# Supplementary material
Source: ML conference proceedings conference paper supplement (https://openreview.net/forum?id=R7pR4dzgAV)
Supplement: supplementary_material [file attachment]

## Sheet: Sheet1
context	Question	Concise_Reference	refined_student_answer_a	refined_student_answer_b	student_answer_a vs student_answer_b	student_answer_a vs student_answer_b	model_answer_a	model_answer_b	model_answer_a vs model_answer_b	stud_answer_a vs model_answer_a	stud_answer_a vs model_answer_b	model_answer_a vs model_answer_b	stud_answer_a vs model_answer_a	stud_answer_a vs model_answer_b
鸦片战争后,中国逐步沦为半殖民地半封建社会。为了探索复兴之路,无数仁人志士，不屈不挠，进行了可歌可泣的斗争，进行了各种各样的尝试，但终究未能改变旧中国社会性质和中国人民的悲惨命运。1917年，十月革命一声炮响，给中国送来了马克思列宁主义。在马克思列宁主义同中国工人运动的结合过程中，1921年中国共产党应运而生。从此，中国人民谋求民族独立、人民解放和国家富强、人民幸福的斗争就有了主心骨。中国人民从精神上由被动转为主动。中国共产党的建立形成了领导中国人民进行革命、建设和改革的领导核心，迎来了中华民族从站起来、富起来到强起来的伟大飞跃。	结合材料并运用政治与法治的知识,说明中国共产党在带领全国人民迎来中华民族从站起来、富起来到强起来的伟大飞跃过程中的历史贡献。	新中国成立后，中国共产党团结带领中国人民，自力更生、发愤图强，创造了社会主义革命和建设的伟大成就，为实现中华民族伟大复兴奠定了根本政治和制度基础。中国共产党团结带领中国人民，解放思想、锐意进取，创造了改革开放和社会主义现代化建设的伟大成就，为实现中华民族伟大复兴提供了充满新的活力的体制保证和快速发展的物质条件。在新时代，中国共产党团结带领中国人民，自信自强、守正创新，统领伟大斗争、伟大工程、伟大事业、伟大梦想，创造了新时代中国特色社会主义的伟大成就，为实现中华民族伟大复兴提供了更为完善的制度保证、更为坚实的物质基础、更为主动的精神力量。	中国共产党带领人民奋发图强,自力更生,取新民主主义胜利1921年中国共产党应运而生,人民的斗争有了主心骨,十一届三中全会，实行了改革开放的历史性决策,改变中国面貌,中国共产党带领人民取得了全面小康社会的胜利成就。中国共产党带领人民打赢了脱贫攻坚战。	中国共产党带领中国人民在经过百年斗争中建立了新中国,取得子新民主义革命的胜利,彻底推翻帝国主义,封建主义和官僚资本主义三座大山。彻底结束当时中国一盘散沙的局面,彻底废除了外国列强，强加在中国的不平等条约,为中华民族伟大复兴提供了保障，中国共产党带领人民实行政革开放的伟大决策,极大地解放和发展了社会生产调动了人民的积极性,将我国的中心工作转移到经济建设上,带领中国人民富强起来	a	b	中国共产党在带领全国人民迎来中华民族从站起来、富起来到强起来的伟大飞跃过程中，展现了其在政治和法治领域的重要历史贡献。以下是几个关键方面： 1. 政治领导：中国共产党的建立为中国人民提供了一个坚定的政治领导核心。党通过其政治理论和实践，引导了中国人民的民族自觉和国家自主意识的觉醒。特别是在1949年后，中国共产党领导的中国政府，通过一系列的政治改革和政策调整，确立了社会主义制度，为国家的长期稳定和发展奠定了基础。 2. 法治建设：中国共产党在执政过程中，重视法治建设，推动了中国法律体系的现代化和完善。例如，1954年颁布的《中华人民共和国宪法》奠定了中国法律体系的基础，之后的一系列法律法规，如《中华人民共和国民法典》等，进一步规范了社会关系，保障了人民的基本权利和自由。 3. 经济发展：中国共产党实施了一系列经济政策，如改革开放政策，推动了中国经济的快速发展。自1978年改革开放以来，中…	中国共产党在带领全国人民迎来中华民族从站起来、富起来到强起来的伟大飞跃过程中发挥了重要的历史贡献。首先，中国共产党通过领导人民进行土地改革、工业化建设和社会主义建设，实现了国家的富起来。通过实行计划经济和进行改革开放，中国的经济得到了快速发展，人民的生活水平不断提高，国家实现了全面建设小康社会的目标。其次，中国共产党领导人民进行革命斗争，推翻了封建主义和帝国主义的统治，实现了国家的站起来。通过抗日战争和解放战争，中国人民摆脱了外国列强的侵略，实现了国家的独立和解放。最后，中国共产党领导人民进行改革开放，推动了国家的强起来。通过实行对外开放政策，中国积极参与国际事务，提高了国家的国际地位和影响力，实现了国家的强起来。总的来说，中国共产党在带领全国人民迎来中华民族从站起来、富起来到强起来的伟大飞跃过程中，发挥了不可替代的作用，为中国的发展和进步做出了重要的历史贡献。	b	b	b	b	model_a	b
2023年3月,全国两会在北京召开。这是在党的二十大胜利闭幕后首次召开的全国两会,也是一次换届大会,意义重大、备受瞩目。作为传递民声、反映民意的桥梁,来自各地各行业的新一届全国人大代表、全国政协委员,把在基层和一线调研中倾听到的群众心声、发现的问题转化为建议、议案、提案,并提交大会 ..小到衣食住行,大到改革发展,人民群众关心什么,代表委员就关注什么,人民群众需要解决哪些问题,代表委员就为解决哪些问题提出真知灼见。2022年国务院部门共办理人大代表建议8721件、政协委员提案5865件,共采纳代表委员所提意见建议4100余条。	运用《政治与法治》的有关知识，分析材料是如何体现全过程人民民主的特点的。	全过程人民民主是最广泛的民主，是全链条、全方位、全覆盖的民主。新一届全国人大代表、全国政协委员来自各地各行各业，具有广泛的代表性。全过程人民民主是最真实的民主。人大代表、政协委员将人民群众的意见和呼声带到两会上。人民的意愿和呼声，经过民主决策程序顺利成为党和国家的方针政策，进而通过政权体系顺利转化为实现人民意愿的具体实践，能够确保人民真正当家作主。全过程人民民主是最管用的民主。代表委员通过调查研究收集民意，将民意和发现的问题以建议、议案、提案的形式上传到全国两会，既发扬民主，又正确集中，能够把党的主张、国家意志、人民意愿紧密融合在一起，使国家和人民朝着共同的奋斗目标前进。	全国人大代表的选举体现了全过程民主的广泛性，因为代表来自不同的民族地区，能够代表各个群体的利益。他们关注的议题也涵盖了人民关心的方方面面，从日常生活中的衣食住行到国家改革发展等重大议题。在人大代表的提案中，可以看到人民的意见和需求得到了充分的表达，这体现了全过程民主的实用性，将人民的关切转化为具体的建议和提案。而人大代表提案数量的增加则反映出了全过程人民民主的广泛性和真实性，说明人民对政治事务的参与程度在不断提高，民主决策的基础更加牢固。	这些材料体现了全过程人民民主的特点。首先，将问题转化为建议、议案并提交大会的过程展示了民主决策的真实性和程序化，确保了人民的意见和建议得到充分的表达和讨论。其次，会议研究的问题涵盖了社会生活的方方面面，体现了全过程民主的广泛性，确保了各种议题和需求都能被充分考虑和解决。再者，国务院部门对大代表建议和政协委员提案进行办理的数据显示了人民民主的真实性和广泛性，政府对人民意见的重视和回应也得以体现。最后，参与全国两会的代表来自各个阶层、民族和地区，这体现了全过程民主的真实性和广泛性，确保了各方面的声音都能被听到和重视。总的来说，这些材料展现了全过程人民民主的特点，即真实性、广泛性和代表性。	b	b	全过程人民民主是中国特色社会主义民主政治的基本制度，它要求在国家的各项事业发展和国家机关工作中，始终坚持以人民为中心的发展思想，确保人民群众的知情权、参与权、表达权和监督权得到实现。材料中，全国两会作为中国的最高人民代表大会和全国政协的年度会议，体现了全过程人民民主的特点，主要体现在以下几个方面： 1. 代表的选举和换届：全国两会的代表和委员是通过普遍、平等、自由、无记名投票的方式选举产生的，这体现了人民群众的直接参与和表达权。换届大会的召开意味着新的代表和委员将带来新的视角和新的建议，这有助于确保代表和委员与人民群众保持紧密联系，反映人民群众的真实意愿。 2. 调研和建议的提出：代表和委员在基层和一线进行调研，倾听群众心声，发现问题，并将这些问题转化为建议、议案、提案。这种方式体现了人民群众的参与权和监督权，确保了政府和相关部门能够及时了解人民群众的需求和关切。 3. 政府的回应和采纳…	材料中体现了全过程人民民主的特点在于代表委员通过调研基层和一线,倾听群众心声,发现问题,并将这些问题转化为建议、议案、提案提交全国两会。这一过程体现了人民群众直接参与国家治理的权利和机会。代表委员在全国两会上代表人民群众的利益和诉求,提出解决问题的真知灼见,通过各种形式的议案和提案向政府部门提出具体改革和发展建议。这种方式使人民民主不仅仅停留在选举投票阶段,更加深入到决策层面,实现了全过程人民民主的特点。 举例来说,2022年国务院部门共办理人大代表建议8721件、政协委员提案5865件,共采纳代表委员所提意见建议4100余条。这说明在国家治理中,人民代表可以通过提出议案和提案,让政府部门采纳他们的意见建议,从而直接参与到国家政策的制定和实施过程中去。	a	a	a	a	stud_a	a
近日，中共中央党史和文献研究院编辑的《习近平关于网络强国论述摘编》一书在全国发行。党的十八大以来，以习近平同志为核心的党中央不断推进网络强国建设，推动网信事业发展,让互联网发展成果更好地造福亿万中国人民.“网信事业要发展,必须贯彻以人民为中心的发展思想。”习近平总书记的相关重要论述深刻阐明了我国互联网发展的丰富内	结合材料，并运用《经济与社会》相关知识，说明如何把我国建设成网络强国。	坚持基本经济制度，毫不动摇鼓励、支持各种所有制企业参与互联网建设。鼓励和支持企业成为研发主体、创新主体、产业主体，鼓励和支持企业布局前沿技术，推动核心技术自主创新，创造和把握更多机会，参与国际竞争，拓展海外发展空间；尊重知识、尊重人才，为人才发挥聪明才智创造良好条件。建立灵活的人才激励机制，让作出贡献的人才有成就感、获得感。	要建设我国成为网络强国，首先必须贯彻以人民为中心的发展思想，保障人民当家作主的地位。这包括适应人民期待和需求，不断满足人民对美好生活的向往。同时，要加快信息化服务普及，降低应用成本，为老百姓提供用得上、用得起、用得好的信息服务，增强人民获得感和幸福感。 其次，要坚持党的领导和社会主义基本经济制度，保障网络空间安全，建设良好生态。这意味着在建设网络强国的过程中，必须确保政治稳定和网络安全，同时保障网络空间的绿色发展，打造一个安全、有序、开放、和谐的网络环境。 总之，只有在以人民为中心的发展思想指导下，充分发挥党的领导作用，保障人民的权益和安全，才能将我国建设成为真正意义上的网络强国。	要把我国建设成网络强国，我们需要坚定不移地巩固和发展公有制经济，加快产业结构优化和布局调整。同时，我们要充分发挥市场在社会主义经济体制中的决定性作用，同时政府要在市场调节中进行宏观科学调控。 另外，我们还要坚持发展为人民、发展依靠人民、发展成果由人民共享的原则，加快信息化服务的普及和建设，降低使用成本，让人民群众从互联网发展中获得更多实际利益。这样才能推动我国成为网络强国，让人民群众在信息化时代中获得更多的获得感。	tie	tie	要把中国建设成网络强国，需要从以下几个方面着手： 1. **加强基础设施建设**：这包括高速互联网基础设施的建设和升级，如宽带、4G、5G等网络基础设施的普及和升级，以及数据中心、云计算等关键基础设施的建设。这些都是网络强国的基础。 2. **推动数字经济发展**：通过政策支持和引导，发展数字经济，促进互联网与实体经济的深度融合。例如，发展电子商务、移动支付、在线教育、远程医疗等新兴产业，促进数字内容创造和服务产业的发展。 3. **加强网络安全和数据安全**：网络安全是网络强国建设的重要保障。需要加强网络安全法规的制定和执行，提升网络安全防护能力，保护用户数据安全，防范和打击网络犯罪。 4. **培养网络人才**：网络强国需要大量的网络技术人才和数字经济人才。需要加强网络技术教育和培训，培养大量的网络技术专家和管理人才。 5. **推动信息化进程**：推动政府信息化、社会信息化和经济信…	根据材料和《经济与社会》相关知识，要把我国建设成网络强国，首先需要贯彻以人民为中心的发展思想，将人民的需求和利益置于首位。这意味着要推动互联网技术的普及和发展，让更多的人能够接触和使用互联网，从而享受到互联网发展带来的便利和福利。同时，要加强网络安全和信息化建设，确保网络空间的安全和稳定，保护人民的个人信息和隐私。 其次，要加强网络监管和治理，建立健全的网络管理制度，打击网络犯罪和不良信息，维护网络空间的清朗和健康。同时，要加强网络文化建设，推动优秀文化资源在互联网上的传播，提升网络文化的质量和水平，培育积极向上的网络文化氛围。 此外，还需要加强网络技术和人才培养，推动我国在互联网技术领域的自主创新和发展，提升我国在全球互联网领域的影响力和竞争力。同时，要加强国际交流与合作，推动构建开放、包容、合作、共赢的互联网治理体系，促进全球互联网发展的共同繁荣。 综上所述，要把我国建设成网络强国，…	a	b	b	a	model_a	b
近年来, H市通过打造公园城市建设工程,共建生态绿色好环境,提升百姓的幸福感。市民出门步行10分钟、骑车5分钟即可到达一个公园。公园建设是百姓的民生福利,让发展成果更公平惠及全体人民,更是通过“公园+” “+公园”的形式促进11城市发展理念的创新,实现从“城市公园”向“公园城市”的转变。这一转变，提高了H城市品位,对于吸引新人才、新产业，刺激旅游发展，带动当地就业均产生了良好效果。	运用《经济与社会》知识，说明 H 市在“公园城市”建设过程中是如何贯彻新发展埋念的？	坚持绿色发展。共建生态绿色好环境，促进人与自然的和谐共生。坚持共享发展。让发展成果更公平惠及全体人民，满足人民对美好生活的追求。坚持创新发展。通过“公园+” “+公园”的形式促进城市发展理念的创新。坚持协调发展。提高城市品位，带动经济发展，促进经济社会协调发展。	H市在“公园城市”建设过程中，通过不断建设公园，坚定不移贯彻绿色新发展理念“绿水青山，就是金山银山”，为人民群众提供了绿色服务环境。同时，H市坚定跟党走，在构建绿色生态环境中不忘贯彻创新新发展理念，实现了从”城市公园”到“公园城市”的创新型转变。此外，H市贯彻了发展的新发展理念，将环境与产业相结合，在多方面促进城市的发展。	H市在“公园城市”建设过程中贯彻了新发展理念。首先，坚持以人民为中心的发展思想，将发展的目标定位为造福人民，依靠人民参与共享发展成果，确保发展成果更多更公平地惠及全体人民。其次，坚持党的领导，积极响应人民需求，提升人民幸福感，增强民生福祉。最后，注重创新，将创新作为引领发展的第一动力，不断培养创新型人才和发展新产业，推动当地旅游产业的发展。	a	a	H市在“公园城市”建设过程中贯彻新发展理念主要体现在以下几个方面： 1. **创新发展理念**：通过打造公园城市，H市不仅仅是为了提供一个美丽的环境，而是将城市建设与居民的生活质量紧密结合起来，体现了以人民为中心的发展思想。这种理念的创新体现在“公园+”和“+公园”的形式上，通过与其他城市功能的结合，如教育、文化、商业等，提升了城市的综合实力和吸引力。 2. **均衡发展**：公园城市建设项目的普及性和便捷性确保了所有市民都能享受到城市绿化带来的好处，无论居住在城市的哪个角落。这种均衡的发展方式有助于缩小城乡差距，提高了社会的公平性。 3. **绿色发展**：通过增加绿地面积和改善城市生态环境，H市在追求经济增长的同时，也注重了环境保护和可持续发展。这种绿色发展理念有助于减少城市污染，改善居民的生活质量，提升城市的整体形象。 4. **开放发展**：公园城市的建设不仅仅是为了本地居民的享…	在H市的“公园城市”建设过程中，市政府贯彻了新发展理念，主要体现在以下几个方面： 1. 绿色发展：通过打造生态绿色的公园，保护城市绿地和生态环境，提升市民的生活质量。这符合现代社会对环境保护和可持续发展的要求。 2. 民生福利：市民出门步行10分钟、骑车5分钟即可到达一个公园，方便市民休闲娱乐，促进身心健康。这体现了政府关注民生、提升民众幸福感的理念。 3. 公平发展：通过公园建设，让发展成果更公平惠及全体人民，缩小城乡发展差距，提高城市品位。这有利于社会稳定和可持续发展。 4. 创新发展：通过“公园+”、“+公园”的形式，促进城市发展理念的创新，实现从“城市公园”向“公园城市”的转变。这有助于激发城市的活力和创新能力。 总的来说，H市在“公园城市”建设过程中贯彻了新发展理念，注重环境保护、民生福利、公平发展和创新发展，从而推动城市的可持续发展和提升市民的生活品质。	a	a	b	a	model_a	b
社会救助是一项托底线、救急难、保民生的基础性制度安排。经过多年发展，我国的社会救助制度不断完善，形成了以最低生活保障、特困人员救助供养、灾害救助、医疗救助、住房救助、教育救助、就业救助以及临时救助为主体，以社会力量参与为补充的制度体系。1999年,国务院颁布施行《城市居民最低生活保障条例》,城市低保制度在全国城镇地区全面建立。2007年,国务院印发《关于在全国建立农村最低生活保障制度的通知》，到 2007年年底，全国全面建立农村低保制度，低保制度实现城乡全覆盖。截至2018年9月底,全国共有城乡低保对象4620万人,其中,城市低保对象1069万人,农村低保对象3551万人。在将需要救助的对象纳入低保范围之余,低保标准也在不断提高。目前,全国平均城市低保标准达到575元1人每月,农村低保标准达到4754元1人每年,分别较2017年同期增长7.6%.12.9%,在“兜底线”之余,也让“底线”…	结合材料和“我国的社会保障”的有关知识,为在“兜底线”之余,也让“底线”越来越有温度提出合理化建议。	建立与经济发展水平相适应、保障适度的社会保障体系，促进社会保障持续发展。要公平对待每个公民并确保其享受相应的社会保障权益，建立起覆盖全民、城乡统筹的社会保障体系，形成没有漏洞的“安全网”。做到权责清晰，各方合理分担责任，严格依法监管。健全社会保障管理和运行机制，确保保障水平持续、有序、合理增长。	我们应当坚持以人民为中心的发展思想，将发展的成果与人民共享，不断提高社会的最低保障水平，让特困人员也能在社会上生存下去。同时，我们还应该优化社会标准的作用，完善社会救助制度的布局和功能，使其能够在多方面发挥作用。另外，我们要不断扩大救助对象的范围，完善民生服务，紧跟中国共产党的领导，全心全意为人民服务。这样，在确保“兜底线”的同时，也让这条“底线”变得更有温度。	建议不断完善我国社会保障体系，确保权责清晰，公平对待每一位公民并保障他们享有相应的社会保障权利。在提高社会保障水平的同时，也要量力而行，让其与经济发展相适应。此外，明确各部门的权责，严格依法监管，以确保社会保障制度的顺利运行和公平公正。	b	b	为了进一步提高我国社会救助制度的效能和温度，确保“兜底线”同时也能让“底线”更加人性化和贴合实际，以下是一些建议： 1. **个性化救助**：根据不同家庭的实际情况，提供更加个性化的救助方案。例如，对于有残疾家庭成员的低保对象，可以提供额外的医疗救助和康复服务；对于有学生的家庭，可以提供教育补贴和学杂费补助。 2. **动态调整标准**：除了定期调整低保标准，还应根据地区经济发展水平、生活成本变化等因素，动态调整低保标准，确保其与实际生活成本保持同步。 3. **加强宣传教育**：提高公众对社会救助制度的认识，减少对救助对象的歧视和偏见。通过媒体、社区等多种渠道，普及社会救助知识，增强公众的社会责任感和同情心。 4. **加强监督管理**：建立健全社会救助的监督机制，确保救助资金的合理使用和救助对象的权益得到保障。通过定期的检查和评估，及时发现问题并采取措施。 5. **鼓励社会力量参与…	建议在提高社会救助标准的同时，加强对低保对象的精准识别和分类管理，确保救助对象真正符合条件。此外，可以加强对低保对象的培训和技能提升，帮助他们脱贫致富，实现自我发展。同时，建议加强对低保对象的心理关怀和社会支持，让他们在获得物质帮助的同时，也能感受到社会的关爱和温暖。通过综合措施，让社会救助不仅是提供物质支持，更是为低保对象带来希望和尊严，让“底线”真正有温度。 。	b	b	b	a	model_a	b
空想社会主义即乌托邦社会主义,流行于19世纪初期的西欧,著名代表人物为莫尔、康帕内拉、欧文、圣西门和傅立叶,主张建立一个没有阶级压迫和剥削以及没有资本主义弊端的理想社会。欧文运用唯物主义对资本主义进行了批判。首次运用政治经济学原理揭示了无产阶级贫困的原因。提出了改造资本主义社会,建立新和谐社会”的方案。1824年欧文在美国印第安纳州买下1214公顷土地,开始新和谐移民区实验,试办共产主义新村“新和谐”村，但实验以失败告终。欧文在《致拉纳克郡报告》中提出消灭私有制,建立财产公有,权利平等和共同劳动的改革社会的理想主张,这标志着他的空想社会主义思想体系的形成。公社实行生产资料公共占有,权利平等,民主管理等原则。欧文的这些想法只能是幻想,行动的结局也必然是失败。	结合材料,运用所学中国特色社会主义的知识,阐述空想社会主义的历史贡献和局限性。	我认为历史贡献是空想社会主义对资本主义进行了揭露和批判，同时表达对未来理想社会的诉求，是科学社会主义的思想来源。空想社会主义者仅从理性、正义等原则出发，揭露资本主义的弊端，提出一些不切实际的社会改造方案。他们主张阶级调和，反对阶级斗争，看不到广大人民群众特别是无产阶级的力量，没有找到消灭资本主义社会和建立新社会的强大力量，也没有找到进行社会变革的正确途径。	空想社会主义在历史上具有重要的贡献。首先，空想社会主义为科学社会主义的建立奠定了基础，为后来马克思主义的产生起到了重要的启蒙作用。其次，空想社会主义唤醒了无产阶级的思想，批判了资本主义制度，提出了建立理想社会的美好向往。然而，空想社会主义也存在一些局限性。首先，缺乏科学理论的指导，导致其行动脱离现实。其次，空想社会主义者们将理想寄托在资产阶级身上，没有意识到无产阶级和资产阶级的对立性，主张阶级调和，忽视了工人和农民的利益。因此，空想社会主义在实践中存在一定局限性。	空想社会主义在历史上具有一定的贡献，首先，它是科学社会主义的思想来源之一，为后来的马克思主义的产生和发展奠定了基础。其次，空想社会主义是工人阶级对美好、自由生活的向往和寄托，为社会主义运动的兴起提供了精神动力。此外，空想社会主义从理性、正义等原则出发，揭露了资本主义的弊端，提出了未来社会的美好蓝图，为人类社会的进步发展提供了重要参考。 然而，空想社会主义也存在着一些局限性，首先，它没有充分看到广大人民群众特别是无产阶级的力量，缺乏对社会现实的深刻分析和把握。其次，空想社会主义主张阶级调和，反对阶级斗争，忽视了阶级斗争在社会发展中的作用，导致其理论脱离了实际阶级斗争的实践基础。因此，空想社会主义在实践中存在着一定的局限性，不能完全解决社会问题，也无法实现社会主义的根本目标。	a	b	空想社会主义作为19世纪初期西欧的一种思想流派，通过其代表人物如莫尔、康帕内拉、欧文、圣西门和傅立叶等的努力，对后世的社会主义思想产生了深远的影响。历史贡献主要体现在以下几个方面： 1. 提出了社会主义理想：空想社会主义者提出了一个没有阶级压迫和剥削的理想社会，这为后来的社会主义运动提供了思想基础和目标指引。 2. 批判资本主义：欧文等人运用唯物主义对资本主义进行了批判，揭示了无产阶级贫困的原因，并提出改造资本主义社会的方案，这些批判和方案为后来的社会主义理论的发展奠定了基础。 3. 实践尝试：欧文在美国印第安纳州的新和谐村实验虽然失败了，但这表明社会主义思想不仅仅是理论上的探索，也有实践的尝试，这对于后来的社会主义实践具有积极的启示意义。 然而，空想社会主义也存在一些局限性： 1. 理想化的社会构想：空想社会主义者往往对社会现实的复杂性缺乏深刻理解，提出的社会构想过于理想化，忽视了人类…	空想社会主义在19世纪初期的西欧提出了建立一个没有阶级压迫和剥削的理想社会的设想，对资本主义进行了批判，并提出了改造资本主义社会的方案。例如，欧文在美国实验新和谐移民区，试图建立共产主义新村，提出消灭私有制，建立财产公有等理想主张。这些思想为后来的社会主义者和共产主义者提供了一定的启示和借鉴，也为人们探讨社会制度的改革提供了新的思路。 然而，空想社会主义也存在着明显的局限性。其理想主张往往脱离实际，无法有效解决现实社会中的问题。例如，欧文的新和谐移民区实验以失败告终，证明了其理想主张在现实中难以实现。空想社会主义缺乏对社会发展规律的深刻理解，无法有效应对社会变革中的复杂问题。相比之下，中国特色社会主义更加注重实践经验和社会主义建设的现实条件，坚持以中国实际情况为基础，积极探索符合国情的社会主义道路。 综上所述，空想社会主义在历史上提出了一些有益的理论探索和社会实践，但其局限性也是显而易见…	a	b	a	tie	stud_a	a
,阅读材料，完成下列要求。《共产党宣言》指出,“共产党人可以把自己的理论概括为一句话:消灭私有制”。生产资料公有制与生产资料私有制是区别社会主义制度与资本主义制度的主要标志。习近平同志指出：“公有制主体地位不能动摇，国有经济主导作用不能动摇，这是保证我国各族人民共享发展成果的制度性保证,也是巩固党的执政地位,坚持我国社会主义制度的重要保证。”改革开放以来，公有制主体地位的巩固和国有经济主导作用的发挥，推动形成了坚实稳定的社会经济基础,有力保障了社会主义现代化强国建设顺利推进和中国特色社会主义事业不断取得新成就。进入新时代,我们要进一步巩固和发展公有制经济,充分发挥其经济社会发展“压舱石”和“稳定器”作用。	结合材料，运用“我国的生产资料所有制”的知识，分析说明我国为什么要坚持公有制主体地位不动摇。	公有制经济是在国家长期发展历程中形成的，为国家建设、国防安全、人民生活改善作出了突出贡献，是社会主义经济制度的基础。我国经济社会发展取得的辉煌成就，离不开公有制经济。以公有制为主体是促进生产力发展的根本要求。生产资料公有制适应社会化大生产要求，是社会主义国家对社会生产和经济发展进行宏观调控的制度基础，有利于推动经济持续健康发展。以公有制为主体是实现共同富裕的基本前提。生产决定分配，不同的生产资料所有制决定不同的分配制度。生产资料公有制决定了社会主义国家必须采取按劳分配制度，体现了人们在生产资料占有上的平等关系，能防止两极分化，有利于人民共享发展成果，实现共同富裕。	我国要坚持公有制主体地位不动摇，是因为生产资料公有制是社会主义的根本特征，国有经济在国民经济中起着主导作用，公有制的主体地位和国有经济的主导作用的发挥，推动形成了坚实稳定的社会经济基础。公有制在经济社会中发挥着“压舱石”和“稳定器”作用，保证了我国各族人民共享发展成果的制度性保证，同时也是巩固党的执政地位，坚持我国社会主义制度的重要保证。因此，坚持公有制主体地位不动摇对于我国的经济发展和社会稳定具有重要意义。	我国的生产资料以按劳分配为主体，多种分配方式并存，公有制主体的地位不可动摇，国有经济主导作用也不能动摇。这是保证我国各族人民共享发展成果的制度性保证，也是巩固党的执政地位，坚持我国社会主义制度的重要保证。坚持公有制主体地位和稳固国有经济主导作用有助于推动形成坚实稳定的社会经济基础，有力保障了社会主义现代化强国的建设顺利推进，中国特色社会主义事业不断取得新成就。因此，进入新时代，我们要进一步巩固和发展公有制经济，充分发挥其经济社会发展的“压舱石和稳定器”作用，要坚持公有制主体地位不动摇。	b	b	我国坚持公有制主体地位不动摇的原因在于《共产党宣言》中提出的消灭私有制的理论基础，以及习近平同志强调的公有制主体地位和国有经济主导作用对于保障社会主义制度、共享发展成果、巩固党的执政地位和推动社会主义现代化强国建设的重要作用。 首先，根据《共产党宣言》的理论，共产党人认为消灭私有制是实现共产主义社会的关键。私有制是资本主义制度的基础，而社会主义制度的建立和发展需要通过公有制来实现生产资料的集体所有权。因此，坚持公有制主体地位是为了推动社会主义制度的建立和完善。 其次，习近平同志的论述指出，公有制主体地位和国有经济主导作用对于保证我国各族人民共享发展成果具有制度性保证。国有企业和集体企业作为公有制经济的重要组成部分，能够在经济发展中起到“压舱石”和“稳定器”的作用，提供稳定的就业机会、保障基本生活水平，并在关键领域和关键时期发挥重要作用。 再者，改革开放以来，我国在坚持公有制主体地位的同时…	我国要坚持公有制主体地位不动摇，是因为公有制是社会主义制度的重要标志，是保证我国各族人民共享发展成果的制度性保证。公有制可以有效地调整资源配置，保障国家经济的稳定和发展。在国有经济主导作用下，我国的经济建设得以有序进行，为社会主义现代化强国建设提供了坚实的经济基础。同时，公有制也可以防止资本主义的私有化倾向，维护社会公平和稳定。因此，坚持公有制主体地位不动摇是巩固党的执政地位、推动社会主义事业发展的重要保证。	tie	a	a	tie	stud_a	a
某班同学以“有为政府，有效作为”为议题开展探究活动时，搜集到以下材料。材料一 为支持实体经济发展，促进综合融资成本稳中有降，中国人民银行于 2023 年 9 月 14日下调金融机构存款准备金率0.25个百分点(不含已执行5%存款准备金率的金融机构)。材料二 国家税务总局数据显示：2023 年 1～4 月，全国已累计新增退税减税降费及缓税缓费约 4 689 亿元。材料三 2023 年上半年中国财政政策执行情况报告指出，全国一般公共预算支出 133 893 亿元，同比增长 3.9%，其中，社会保障和就业支出增长 7.9%;教育支出增长5%；卫生健康支出增长 6.9%；农林水利支出增长 3.7%；科学技术支出增长 2.5%；住房保障支出增长 8.5%。	请运用“更好发挥政府作用”的知识，说明政府实施上述举措的积极意义。	我国政府通过下调金融机构存款准备金率等稳健的货币政策和实施减税降费等积极的财政政策，有利于激发市场活力，保持经济总量平衡，促进经济持续健康发展。我国财政加大对社会保障和就业支出力度，有利于增加就业，改善民生。我国扩大财政支出，支持教育、医疗、体育等领域，有利于加强和优化公共服务，更好满足人民日益增长的美好生活需要。	政府实施更好发挥政府作用的举措具有积极意义。首先，能够减轻人民生活压力，提供更好的公共服务和福利，改善民生水平。其次，有助于促进发展共同富裕，通过政府的引导和支持，实现收入分配更加公平，让更多人分享发展成果。第三，政府的作用对于科技发展至关重要，可以推动科技创新，提升国家竞争力。另外，政府的作用也有助于完善社会保障制度，保障人民的基本权益和福利。最后，政府的介入可以促进人民共同富裕，实现社会稳定和可持续发展。	政府实施更好发挥作用的举措具有重要积极意义。首先，这将为人民提供更好的物质生活，使人民享有更多的福利和保障。其次，这将让人民有成就感、自豪感和幸福感，增强人民对国家的认同感和归属感。再者，政府的服务将更加贴近人民，更加高效便捷，从而真正实现为人民服务的宗旨。此外，更好发挥政府作用有利于建设和谐社会，促进社会稳定和发展。最后，这将增强人民对政府的信任和支持，推动国家各项事业不断向前发展。	a	a	政府通过实施上述举措，展现了其在推动经济发展、优化税收政策以及加强公共服务领域的积极作用。 首先，中国人民银行下调金融机构存款准备金率的决定，旨在支持实体经济发展。这种降息措施有助于增加金融机构的贷款余额，降低企业和个人融资成本，从而促进经济的稳定增长。例如，通过降低贷款成本，企业可以更容易地获得资金来扩大生产、改善产品质量和技术，进而提高竞争力和市场占有率。 其次，国家税务总局的退税减税降费及缓税缓费措施，体现了政府在减轻企业和个人的税负方面的关注。这些措施有助于缓解企业的财务压力，提高企业的盈利能力和市场竞争力。同时，减税降费也能增加消费者购买力，刺激国内需求，从而促进经济的全面恢复和可持续发展。 最后，财政政策执行情况报告显示，政府在社会保障、教育、卫生健康、农林水利、科学技术和住房保障等领域的支出增长，体现了政府在保障民生和推动社会发展的承诺。这些领域的增长不仅能够提升人民的生活…	政府实施上述举措的积极意义在于促进经济发展和社会稳定。下调金融机构存款准备金率有助于降低企业融资成本，促进实体经济发展。新增退税减税降费及缓税缓费可以减轻企业负担，增强企业活力，促进经济增长。同时，财政政策支出增加了对社会保障、教育、卫生健康、农林水利、科学技术和住房保障的投入，有利于改善民生，促进社会公平和稳定。这些举措有助于实现更好发挥政府作用，推动经济社会持续健康发展。 .	a	b	b	a	model_a	tie
某班同学以“有为政府，有效作为”为议题开展探究活动时，搜集到以下材料。材料一 为支持实体经济发展，促进综合融资成本稳中有降，中国人民银行于 2023 年 9 月 14日下调金融机构存款准备金率0.25个百分点(不含已执行5%存款准备金率的金融机构)。材料二 国家税务总局数据显示：2023 年 1～4 月，全国已累计新增退税减税降费及缓税缓费约 4 689 亿元。材料三 2023 年上半年中国财政政策执行情况报告指出，全国一般公共预算支出 133 893 亿元，同比增长 3.9%，其中，社会保障和就业支出增长 7.9%;教育支出增长5%；卫生健康支出增长 6.9%；农林水支出增长 3.7%；科学技术支出增长 2.5%；住房保障支出增长 8.5%。	在探究活动中，有同学认为，在现代经济中，政府对资源的配置效果优于市场，请运用“社会主义市场经济体制”的知识对此加以分析,	这一观点是错误的。在瞬息万变的经济生活中，通过价格、供求、竞争和风险机制，市场能够促使生产要素优化组合，促进商品生产者改善经营管理、提高生产技术，并最终实现资源的优化配置。可见，市场对资源配置起决定性作用。由于市场失灵的存在，单纯依靠市场调节并不能使经济自动趋向于均衡状态，必须要通过国家干预，运用各种政策手段综合调控经济，才能实现经济的良性发展。可见，政府对资源配置起辅助作用。促进市场经济健康发展，实现资源合理配置，在强调市场对资源配置的决定性作用的同时，还要强调优化政府职能，推动有效市场和有为政府更好结合。	是在市场机制的基础上，政府通过宏观调控来引导资源的合理配置，而不是取代市场。⑤政府在资源配置中的作用是保障公平、促进发展、维护稳定，而非完全取代市场。因此，在现代经济中，政府和市场应该相辅相成，共同发挥作用，而不是简单地认为政府对资源的配置效果优于市场。	在探究活动中，有同学认为，在现代经济中，政府对资源的配置效果优于市场。然而，根据社会主义市场经济体制的知识来看，市场调节是一只无形的手，而政府是一只有形的手。在社会主义市场经济体制中，市场经济仍然拥有重要地位，政府的角色是在必要时进行干预和调节，以保障公平和效率。因此，政府对资源的配置效果并非总是优于市场，而是需要在市场的基础上进行合理的引导和监管。	b	b	在探讨政府对资源配置的效果与市场配置的比较时，我们需要理解社会主义市场经济体制的基本原则和特点。社会主义市场经济体制是中国特色社会主义经济体制的核心，是指在社会主义基本经济制度的基础上，建立多种所有制经济共同发展的市场经济体制。这种体制既有市场的活力，又有社会主义的定向和调控。 首先，市场经济体制以价格机制为核心，通过竞争和供需关系来配置资源。市场能够有效地利用资源，实现资源的最优配置，因为价格机制能够反映资源稀缺性和社会偏好。然而，市场经济也存在着信息不对称、市场失败等问题，这些问题可能导致资源配置不均衡或不合理。 政府作为社会主义市场经济体制的重要组成部分，通过宏观调控和微观干预，能够在市场配置不足或市场配置出现偏差时，起到补充和调整的作用。政府可以通过政策引导，促进资源向社会的薄弱环节流动，例如通过税收优惠、补贴等措施，支持实体经济发展，促进就业和社会稳定。 在您提供的材料中，中国…	根据社会主义市场经济体制的原则，政府在资源配置中扮演着重要的角色。在现代经济中，政府通过实施各种宏观调控政策，如调整存款准备金率、实施退税减税政策等，来引导和规范市场经济的运行，促进实体经济的发展。例如，中国人民银行下调金融机构存款准备金率和国家税务总局实施退税减税政策，都是政府为了支持实体经济发展而采取的措施。 在社会主义市场经济体制下，政府可以通过财政政策、货币政策等手段来调节经济发展的速度和方向，确保资源配置的合理性和效率性。政府可以通过增加社会保障和就业支出、教育支出、卫生健康支出等方式，来提高公共服务水平，促进社会公平和经济可持续发展。 因此，社会主义市场经济体制下的政府在资源配置中发挥着重要作用，通过政策引导和调节，可以优化资源配置，促进经济的健康发展。市场在资源配置中的作用是重要的，但政府的干预和引导也是必不可少的，两者相辅相成，共同推动经济的发展和社会的进步。	a	b	b	tie	model_a	b
立国之道，惟在富民。广西为增加居民收入，实施“三年就业促进行动”，其中包括：建立重大政策、重大投资对就业影响评估机制，推动就业岗位与人力资源有效衔接；全力打造“八桂创新创业”活动品牌和人才创业平台，对毕业 5 年内的高校毕业生、返乡创业农民工首次创办小微企业并正常经营1年以上的，给予不少于 5 000元的一次性创业扶持补贴；引导完善创新型中小企业上市股权激励和员工持股计划制度规则，推进国有控股混合所有制企业员工持股试点工作，引导企业员工投资持股；为符合条件对象代缴部分或者最低标准养老保障标准自然增长机制，力争 3 年内广西累计城镇新增就业超过 100 万人。	结合材料，运用“我国的个人收入分配”的知识，说明广西是如何增加居民收入的。	劳动是财富的源泉，广西通过完善就业机制，大力促进就业，增加居民劳动性收入。通过鼓励创新创业，增加居民经营性收入。通过引导企业员工投资持股，增加居民财产性收入。通过健全以转移支付为主要手段的再分配调节机制，健全社会保障体系，兜底保障困难群体，增加居民转移性收入。	广西通过优化就业条件、大力支持创业、通过福利政策给予补贴、鼓励、支持中小企业发展，引导企业员工投资持股，完善养老保障机制等措施来增加居民收入。	广西通过多种途径来增加居民收入。首先，建立了重大政策、重大投资对就业影响评估机制，促进就业岗位与人力资源的有效衔接，为居民提供更多就业机会。其次，鼓励毕业十年内的高校毕业生返乡创业，同时支持农民工创办小微企业，并给予补贴帮扶，帮助他们增加收入。此外，引导完善创新中小企业上市股权激励和员工持股计划制度规则，让更多员工分享企业发展成果。另外，为符合对象代缴部分养老保障标准自然增长机制，提高居民的社会保障水平。同时，鼓励居民创新、劳动，用劳动创造财富，优化资源配置，将潜在的资源转化为现实的资源，为居民增加收入。通过这些举措，广西积极促进居民收入增长，助力经济社会发展。	a	a	广西通过实施“三年就业促进行动”来增加居民收入，这一策略体现了我国个人收入分配的基本原则，即通过促进就业和提高劳动生产率来增加居民收入。具体措施如下： 1. 建立重大政策和重大投资对就业影响评估机制：这有助于优化资源配置，确保投资项目对就业的正面影响最大化。通过评估机制，可以更好地理解不同政策和投资对就业市场的影响，从而制定更加有效的就业政策。 2. 推动就业岗位与人力资源有效衔接：这意味着广西在促进就业的同时，也在提高劳动力市场的效率。通过建立有效的就业服务平台，帮助劳动力与就业岗位匹配，降低就业成本，提高劳动力使用效率，从而提高居民的收入水平。 3. 打造“八桂创新创业”活动品牌和人才创业平台：这不仅为高校毕业生和返乡创业农民工提供了创业的机会，也为他们提供了创业的支持和资源。通过给予创业者一次性创业扶持补贴，可以减轻创业初期的资金压力，降低创业风险，提高创业成功率，从而增加居民的收…	广西通过实施“三年就业促进行动”来增加居民收入。首先，通过建立重大政策、重大投资对就业影响评估机制，推动就业岗位与人力资源有效衔接，促进就业增加，从而增加居民收入。其次，广西打造“八桂创新创业”活动品牌和人才创业平台，给予毕业5年内的高校毕业生、返乡创业农民工创办小微企业并正常经营1年以上的一次性创业扶持补贴，鼓励人们积极创业，增加收入来源。此外，引导完善创新型中小企业上市股权激励和员工持股计划制度规则，推进员工持股试点工作，激励企业员工参与企业发展，分享企业收益。最后，为符合条件对象代缴部分养老保障标准，增加个人收入保障，帮助人们提高收入水平。通过以上措施，广西致力于增加就业机会，鼓励创业和投资，为居民增加收入提供了多方面的支持和保障。 。	tie	b	b	tie	model_a	b
“有一种唯物主义学说，认为人是环境和教育的产物，因而认为改变了的人是另一种环境和改变了的教育的产物。”“从前的一切唯物主义包括费尔巴哈的唯物主义的主要缺点是：对事物、现实、感性只是从客体的或者直观的形式去理解，而不是把它们当作人的感性活动，当作实践去理解，不是从主观方面去理解。所以，结果竟是这样，和唯物主义相反，唯心主义却发展了能动的方面，但只是抽象地发展了”。“哲学家们只是用不同的方式解释世界，而问题在于改变世界。”“环境的改变和人的活动的一致，只能被看作是并合理地理解为革命的实践。”马克思主义哲学正是基于实践观点，打通了主体与客体的彼此对立，实现了哲学史上的伟大革命。	结合材料，从时代精神的精华角度，说明如何理解马克思主义哲学正是基于实践观点实现了哲学史上的伟大革命。	旧唯物主义只从客体方面去理解世界，而没有看到人是通过实践活动去改造环境，具有形而上学性。唯心主义片面强调意识的能动作用，夸大了人的主观能动性。二者均没有立足实践去理解事物。实践观点是马克思主义哲学的核心观点，马克思主义哲学在科学实践的基础上，第一次实现了唯物主义与辩证法的有机结合。马克思主义哲学实现了实践基础上的科学性和革命性的统一，正确揭示了世界的本质和运动规律。马克思主义哲学在人与世界关系方面，从实践出发理解周围世界，在历史观中，从实践出发理解社会存在和发展，在认识论中，把实践作为全部认识的基础。	马克思主义哲学之所以能够实现哲学史上的伟大革命，主要是因为它具有科学性和革命性。首先，马克思主义哲学揭示了事物发展的规律，经过无数实践的检验，被证明是科学的。其次，马克思主义哲学是改变世界的科学，为无产阶级改革世界提供了科学的世界观和方法论的指导。此外，马克思主义哲学正确地回答了哲学的基本问题，即存在决定意识、意识正确地认识存在。最重要的是，马克思主义哲学具有与时俱进的特点，中国共产党结合中国实际和马克思主义基本原理，不断发展中国特色社会主义理论，为中国社会改革发展提供了科学的指导。因此，马克思主义哲学基于实践观点实现了哲学史上的伟大革命。	马克思主义哲学之所以能够实现哲学史上的伟大革命，是因为它根植于实践观点，真正体现了时代精神的精华。马克思主义哲学为无产阶级提供了科学的世界观和方法论，反映了时代的任务，把握时代脉搏，总结时代的经验和教训。通过实践的方式，马克思主义哲学不仅在理论上实现了革命，更在实践中对时代精神进行了深刻的诠释和实践，从而在哲学史上取得了伟大的革命性突破。	a	a	马克思主义哲学之所以能够实现哲学史上的伟大革命，是因为它将实践观点作为其核心，打破了传统唯物主义和唯心主义之间的对立，实现了主体与客体的统一。马克思主义认为，人不是被动地接受环境和教育的产物，而是主动地与环境和教育发生互动，通过实践活动来改变自己和周围的世界。这一点体现在马克思主义的基本原理中，如“人的本质是实践的”和“人的生命活动是多方面的实践活动”。 马克思主义哲学的实践观点强调了人的感性活动和实践的重要性，不仅仅是对事物的直观认识，还包括对事物的主观理解和改变。这种观点超越了传统唯物主义的局限，避免了对事物的被动接受，而是强调了人的主体性和能动性。马克思主义哲学认为，通过实践活动，人们可以改变环境，改造世界，这种环境的改变和人的活动的一致，是革命的实践的体现。 马克思主义哲学的实践观点还体现在它对历史的理解上。马克思主义认为，历史是由人们的实践活动和社会关系的变化推动的，而不是由某…	从时代精神的角度来看，马克思主义哲学正是基于实践观点实现了哲学史上的伟大革命。在马克思主义哲学中，实践被视为认识的源泉和验证的标准，强调通过实践来改变世界和认识世界。这种实践观点的提出，打破了传统哲学对于客体和主体的二元对立，使得人的实践活动与环境的改变能够被理解为革命的实践。 举例来说，马克思主义强调人类历史的发展是由人们的实践活动推动的，而不是超自然力量或者纯粹的意识形态所决定的。通过对生产关系、生产力以及社会结构的实践改变，可以实现社会的革命和进步。这种基于实践观点的革命性理念，为整个哲学史上的思想提供了崭新的视角和方法论。 因此，马克思主义哲学的实践观点正是在时代精神的影响下实现了哲学史上的伟大革命，使得人们能够更加深入地理解和改变世界，而不仅仅是用不同方式解释世界。通过对实践的重视，马克思主义哲学为人类社会的发展提供了坚实的理论基础和实践指导。 .	b	b	b	b	model_a	b
人间烟火气，氤氲武汉城，武汉美食人气旺，“碳水天堂“吸引八方来客，为打造武汉美食名片,武汉市近日出台文件提出,要推进美食“老字号”可持续发展,助推打造武汉文旅品牌。武汉市政府陆续出资千万,对符合要求的美食品牌进行奖补。武汉还将在对接线上平台、组织美食企业参展等方面加大力度,推动“老字号”持续发展。对于“网红”“流量”美食,优化饮食环境同时加强市场监管,狠抓食品安全,铸牢健康防线,减少“昙花一现”式美食,着力培育“长青“新品牌。	结合材料，浅谈武汉市在培育美食名片过程中是如何坚持一切从实际出发的。	武汉市打造美食名片，尊重事物运动的客观规律，从客观存在的事物出发，找出事物本身固有的规律性，作为行动依据，针对“老字号”和网红美食，实施符合规律性的发展策略。武汉市充分发挥主观能动性，解放思想，与时俱进，求真务实，针对各种美食采取不同策略，用科学理论指导实践。武汉市把发挥主观能动性和尊重客观规律结合起来，把高度的革命热情同严谨踏实的科学态度结合起来，精准施策，打造美食名片。	在培育美食名片的过程中，武汉市始终坚持一切从实际出发。这就意味着要遵循客观发展规律，如何打造武汉的美食名片，就要根据市场需求和消费趋势来制定相应的发展策略。同时，也要发挥主观能动性，与线上平台对接，组织美食企业发展，推动武汉美食产业的蓬勃发展。在这个过程中，武汉市也强调了遵循客观规律和发挥主观能动性相结合的原则，反对夸大风气，加强市场监管，确保美食产业健康发展，铸就守护健康防线的重要使命。	武汉市在培育美食名片过程中始终坚持一切从实际出发。首先，武汉美食人气旺盛，享有“碳水天堂”的美誉，吸引了大量游客，这是基于客观存在的事物。其次，武汉政府发挥意识的主观能动性，大力打造“老字号”、武汉文旅品牌，并积极推广宣传，展现出了高度热情和严谨态度。此外，武汉将尊重客观规律和发挥能动作用相结合，不仅大力宣传美食，还加强市场监管，确保美食质量和安全。最重要的是，武汉不夸大意识能动作用，不安于现状，不因循守旧，而是铸牢健康防线，减少“昙花一现”美食，着力培育“长青”新品牌。在培育美食名片的过程中，武汉市始终坚持实事求是，既尊重客观规律又发挥市场主体作用，努力打造具有持久魅力的美食品牌。	a	a	武汉市在培育美食名片过程中坚持一切从实际出发，主要体现在以下几个方面： 1. **针对性奖补**：武汉市政府通过对符合要求的美食品牌进行奖补，直接针对“老字号”这一实际存在的问题，提供资金支持，帮助这些品牌进行可持续发展。这种做法考虑到了“老字号”的历史积淀和品牌价值，既保护了传统文化，又促进了品牌的长期发展。 2. **结合线上线下资源**：武汉市在对接线上平台和组织美食企业参展方面加大力度，既考虑到了现代消费者的线上购物习惯，也利用线下活动的实体优势，形成了线上线下的互补和融合。这种做法既满足了市场的实际需求，也提高了品牌的知名度和影响力。 3. **市场监管与食品安全**：在优化饮食环境的同时，加强市场监管和食品安全管理，确保消费者能够享受到安全、健康的美食。这体现了武汉市政府在保护消费者权益和维护社会稳定的实际考虑。 4. **培育新品牌**：通过减少“昙花一现”式美食，着力培育…	武汉市在培育美食名片过程中坚持一切从实际出发，主要体现在以下几个方面： 首先，武汉市政府出台文件提出推进美食“老字号”可持续发展的举措，这是基于实际情况下对传统美食文化的保护和传承的需求，也是考虑到老字号对于武汉美食文化的重要性。通过出资奖补符合要求的美食品牌，武汉市实际行动支持传统美食文化的传承与发展。 其次，对于“网红”“流量”美食，武汉市在优化饮食环境的同时加强市场监管，狠抓食品安全。这反映了市政府从实际出发，意识到在发展美食文化的过程中，食品安全是至关重要的问题，需要加强监管和保障食品质量，避免出现“昙花一现”式美食，确保市民的健康安全。 最后，武汉市还将在对接线上平台、组织美食企业参展等方面加大力度，推动“老字号”持续发展，培育“长青“新品牌。这些举措都是基于实际情况对市场需求和产业发展的深入调研和分析，有针对性地促进武汉美食文化的传承和发展。 总的来说，武汉市在培育美食名片过…	a	a	a	a	stud_a	a
年轻充满朝气，青春孕育希望。2023 年 7 月 28日，第 31 届世界大学生夏季运动会将在成都拉开帷幕，国家主席习近平激励着广大青年不负时代、不负韶华，在青春的赛道上奋力奔跑。特别是党的十八大以来,广大青年在脱贫攻坚战场摸爬滚打,在科技攻关岗位奋力攀登，在抢险救灾前线冲锋陷阵，在疫情防控一线披甲出征，在奥运竞技赛场奋勇争先，在保卫祖国哨位威武守护，在党和人民最需要的时刻冲得出来、顶得上去，展现出自信自强、刚健有为的精神风貌。“清澈的爱,只为中国”,年轻人要善于把自己的奋斗放到时代的平台上去,融入时代发展的潮流之中。新时代是追梦者的时代，也是广大青年成就梦想的时代。与新时代同向同行、共同前进，当代中国青年生逢盛世、肩负重任；身处中华民族发展的最好时期，将个人奋斗的“小目标”融入党和国家事业的“大蓝图”，方能不负韶华、不负时代、不负人民。	结合材料，运用整体与部分的相关知识，说明如何正确处理国家发展与个人梦想之间的关系。	国家发展与个人梦想是整体与部分的关系，二者相互区别、又相互联系、相互影响。部分服从和服务于整体，部分的功能及其变化影响整体的功能，我们要重视部分的作用。我们要将个人奋斗的“小目标”融入党和国家事业的“大蓝图”，练就过硬本领，坚定理想信念，为祖国的发展贡献自己的力量。整体居于主导地位，统率着部分，我们应当树立全局观念。我们要立足新时代国家的发展实际，调整个人梦，主动肩负起时代重任。	正确处理国家发展与个人梦想之间的关系，需要既看到整体与部分的相互区别，又要意识到二者的相统一。国家发展涵盖多方面，个人梦想只是其中的一部分。因此，年轻人在追逐个人梦想的同时，要将个人奋斗融入时代平台、发展潮流中，促进国家发展。这种整体与部分的关系就如同正统与要素的关系，将个人奋斗的“小目标”融入党和国家事业的“大蓝图”，无数个人梦想的实现将成就国家的发展。因此，个人梦想的实现不仅是对个人的成就，也是对国家发展的贡献。	正确处理国家发展与个人梦想之间的关系，需要树立全局观念，用系统优化方法，着眼于整体性，遵循理性。在祖国需要我们的时候，我们应该冲得出来，顶得上去。我们可以运用思维的方法认识事物，将个人奋斗目标融入伟大中国梦中。立足整体，注重部分发展，我们在青春的道路上奔跑，不负韶华，也不负时代。整体决定部分，部分反映整体，两者在一定条件下可以相互转化。因此，只有在注重国家发展的同时，我们才能实现个人梦想，为祖国的繁荣和富强贡献自己的力量。	a	a	在国家发展与个人梦想之间的关系处理上，整体与部分的相关知识可以提供一个有益的视角。首先，我们可以将国家发展视为整体，而个人梦想则是其中的一个部分。正确处理这两者之间的关系，需要从整体出发，既要实现个人梦想，又要为国家的发展贡献力量。 1. **融入国家发展的大蓝图**：个人梦想应该与国家的发展战略相结合。例如，通过学习和工作，年轻人可以将自己的专业技能和知识应用到国家的发展项目中，如科技创新、环境保护、教育改革等领域。这样，个人梦想不仅能够得到实现，还能为国家的长远发展做出贡献。 2. **个人目标与国家目标的协调**：个人应该设定符合国家发展需要的目标。例如，在脱贫攻坚战场上，年轻人可以通过志愿服务、技术支持等方式帮助贫困地区发展，既实现了个人对社会的贡献，也为国家的全面小康社会建设做出了自己的部分。 3. **个人梦想的实现与国家发展的同步**：个人在追求梦想的过程中，应该关注国家发…	个人梦想与国家发展之间的关系是一个既相互关联又相互促进的过程。作为广大青年，我们应该意识到自己的个人梦想是融入到国家发展大局中的一个重要组成部分。首先，个人梦想需要符合国家的发展战略和政策方向，要有利于国家的长远发展和民族复兴。其次，个人梦想的实现过程中，也需要关注国家的发展需求，为国家的建设和发展贡献自己的力量。例如，积极参与科技创新、社会公益等活动，为国家的现代化进程提供支持。 同时，国家的发展也为个人梦想提供了更广阔的舞台和更多的机遇。国家的繁荣稳定为个人提供了更好的发展环境，为个人梦想的实现提供了更多的可能性。正如习近平主席所说，新时代是追梦者的时代，广大青年应当把个人的奋斗融入国家事业中，共同实现个人梦想和国家发展的双赢。 因此，正确处理国家发展与个人梦想之间的关系，就是要在实现个人梦想的过程中，不忘国家的需要，积极投身国家建设和发展事业，为实现国家发展目标贡献自己的力量，同时…	a	a	a	a	stud_a	a
材料一 新中国成立以来中国共产党对我国不同发展阶段社会主要矛盾做出了准确的判断。这些不同的矛盾反映了我国当时的社会状况和国情变化,也为我们制定发展思路提供了社会依据。	结合材料一，运用“用对立统一的观点看问题”的相关知识，说明为什么把不同时期的主要矛盾当作我们制定发展思路的社会依据。(7分)	在复杂事物的发展过程中存在着许多矛盾，其中主要矛盾的存在和发展决定或影响着其他矛盾的存在和发展，在事物发展过程中处于支配地位，对事物的发展起决定作用。所以我们在分析不同时期国情特点时，必须坚持重点论，着重把握并集中力量解决主要矛盾，只有准确把握并正确解决了当时的主要矛盾，才能推动其他矛盾的解决，推动社会不断进步。具体问题具体分析是正确认识事物的基础，是正确解决矛盾的关键。不同时期的主要矛盾反映了我国当时的社会状况和国情变化，只有从实际出发，具体分析当时的主要矛盾，才能有针对性地解决问题，推动社会发展。	不同时期的主要矛盾是社会发展的动力之一，正是因为整体和部分相互区别，整体和部分相统一的关系，才能够将个人梦想与国家发展有机地结合起来。年轻人要将个人奋斗放入时代发展潮流中，促进国家发展。通过将个人奋斗的“小目标”融入党和国家事业的“大蓝图”，无数个人的梦想最终成就了国家的发展。个人梦想的实现推动了国家的发展，体现了整体和部分的系统性关系，体现了整体的发展需要部分的支持。因此，把不同时期的主要矛盾当作我们制定发展思路的社会依据是必要的。	将不同时期的主要矛盾作为我们制定发展思路的社会依据，有助于我们更准确地把握和认识事物的本质。主要矛盾的主要方面决定了事物的性质，因此，我们需要重点关注不同时期的主要矛盾，以便更好地指导我们的发展方向。同时，矛盾中的两方力量是不平衡的，主要矛盾具有主导作用，次要矛盾是从属地位，因此，解决主要矛盾可以带动次要矛盾的解决。最后，普遍性存在于特殊性中，因此我们需要具体问题具体分析，把握不同时期的主要矛盾，这样才能更好地解决矛盾，推动事物的发展。因此，将不同时期的主要矛盾作为我们制定发展思路的社会依据，能够帮助我们更好地推动社会的发展。	b	b	结合材料一，中国共产党在新中国成立以来，通过不断地分析和判断，成功地识别了我国不同发展阶段的社会主要矛盾。这些主要矛盾不仅反映了当时的社会状况和国情变化，而且也为我们制定发展思路提供了重要的社会依据。 用对立统一的观点看问题是马克思主义的基本观点之一，它强调在社会发展的过程中，存在着不同的对立面（如生产力与生产关系、城市与农村、不同阶级等），这些对立面在一定条件下会发生冲突，但同时也相互依存、相互作用，共同推动社会的发展。中国共产党在运用这个观点时，能够准确地识别出不同发展阶段的主要矛盾，这些矛盾往往是社会发展的关键点，也是推动社会进步的动力。 例如，在新中国成立初期，主要矛盾是“内部矛盾”，即国内的阶级矛盾和反动势力的活动；随着社会主义建设的深入，主要矛盾转变为“经济建设与技术进步的矛盾”；在改革开放后，主要矛盾又转化为“经济建设与社会主义现代化建设的矛盾”。这些矛盾的变化反映了我国社…	根据“用对立统一的观点看问题”的相关知识，我们知道事物的发展是由矛盾的斗争推动的。不同时期的主要矛盾反映了当时社会的主要矛盾方向和焦点，它们是社会发展的动力源泉。因此，通过准确判断不同时期的主要矛盾，我们可以更好地把握社会发展的脉络和规律，有助于制定科学合理的发展思路，加快社会发展进程。 举例来说，新中国成立初期，中国社会主要矛盾是人民对帝国主义、封建主义、官僚资本主义的斗争。因此，共产党制定了以土地改革和社会主义革命为主要任务的发展思路，引领了中国社会的发展方向。而随着社会主要矛盾的变化，比如近年来我国主要矛盾转变为人民日益增长的美好生活需要和不平衡不充分的发展之间的矛盾，共产党也提出了实现高质量发展、推动经济结构优化升级的新发展理念和战略，以适应当前社会的发展需求。 通过对不同时期的主要矛盾进行准确判断，并以此为依据来制定发展思路，可以更好地推动社会的发展进步，实现国家的长足发展。 。	tie	b	b	tie	model_a	b
材料二中国共产党执政以来把握了不同阶段主要矛盾的“变”与“不变”,真正诠释了“以人民为中心”的理念。今年入汛以来,我国多地遭遇严重强降雨,汛情、灾情牵动人心。习近平总书记“时时放心不下”,作出一系列重要指示批示。纵观党的历史,写满了对人民地位的尊重、对人民利益的关切、对人民期待的担当，不变的永远是中国共产党的“民生情怀”。	中国共产党执政以来把握了不同阶段主要矛盾的“变”与“不变”，真正诠释了“以人民为中心”的理念。结合材料二，运用矛盾的普遍性和特殊性的有关知识来解读这一说法。	矛盾具有普遍性，在任何时候，对任何事物，我们都要敢于承认矛盾、勇于直面矛盾，并善于分析和解决矛盾。在不同过程和阶段上，中国共产党始终围绕人民的需求，做到了以人民为中心，正确面对矛盾、解决矛盾。矛盾具有特殊性，同一事物在发展的不同过程和阶段上有不同的矛盾。中国共产党正确把握国情的变化，根据不同阶段我国人民的不同需求，具体分析矛盾，制定出了真正符合人民根本利益的路线、方针。矛盾的普遍性与特殊性相互联结，普遍性寓于特殊性之中并通过特殊性表现出来，特殊性也离不开普遍性。中国共产党把握事物矛盾问题的精髓，做到了矛盾的普遍性与特殊性、共性与个性具体的历史的统一，始终不忘初心，同时又分析不同阶段主要矛盾的变化，实现和维护了最广大人民的根本利益。	中国共产党在执政以来，始终坚持以人民为中心的理念。在面对各种矛盾和挑战时，党始终秉持矛盾的普遍性和特殊性原则，灵活应对，不断推动事物的发展。 在灾情面前，中国共产党作出了一系列重要指示，充分认识到矛盾的存在，积极面对并分析矛盾，努力解决矛盾，体现了矛盾的普遍性。同时，党也深刻理解到矛盾的特殊性，根据不同阶段主要矛盾的变化，制定相应的政策和措施，推动国家的发展。 矛盾的普遍性与特殊性相互联结、推动了事物的发展，中国共产党的实践更好地诠释了“以人民为中心”的理念，不断为人民谋福祉，努力实现国家的长治久安。	深刻理解并贯彻矛盾的普遍性和特殊性的辩证法原则。 在中国共产党执政以来的历程中，我们党始终坚持以人民为中心的思想，不断把握不同阶段主要矛盾的“变”与“不变”。这既体现了矛盾的普遍性，又充分运用了矛盾的特殊性。我们党敢于正视问题，善于分析矛盾的共性和个性，从而找到解决问题的有效途径。 矛盾的普遍性和特殊性是相辅相成的，共性和个性相互交融。我们党深刻理解矛盾的辩证法原则，把握矛盾的共性和个性，不断推动解决矛盾的进程。通过把马克思主义与中国国情、中华文化相结合，我们党在执政中实践“以人民为中心”的理念，不断推动社会主义事业取得新的成就。这正是我们党坚持不懈探索的矛盾普遍性和特殊性的辩证统一的重要体现。	b	b	中国共产党执政以来，始终坚持以人民为中心的发展思想，通过对不同历史时期主要矛盾的深刻把握，实现了从“变”到“不变”的转变。主要矛盾的变与不变体现了矛盾的普遍性和特殊性。 矛盾的普遍性指的是矛盾存在于一切事物之中，不论是自然界还是社会，它是事物发展的内在动力。中国共产党在执政过程中，始终坚持以人民为中心的发展思想，这是对人民利益的关切和对人民期待的担当，是党的根本宗旨和政治本质。这种理念的坚持，体现了矛盾的普遍性，即在党的历史发展中，人民的利益和需求是不断变化的，党必须不断适应这些变化，调整政策和措施以满足人民的需求。 矛盾的特殊性则指的是每个矛盾都有其独特性，具有个体差异。中国共产党在不同历史阶段面临的主要矛盾也不尽相同。例如，在新中国成立初期，主要矛盾是建设社会主义与国内外敌对势力的斗争；在改革开放后，主要矛盾转变为经济建设与其他方面的平衡发展。党通过对这些特殊性矛盾的深刻把握，制定了…	根据材料二的描述以及对矛盾的普遍性和特殊性的了解，我们可以解读中国共产党执政以来把握不同阶段主要矛盾的“变”与“不变”是因为在不同历史条件下，主要矛盾的性质和表现形式会发生变化，但始终坚持“以人民为中心”的理念是中国共产党对人民的责任和担当，这是中国共产党的“民生情怀”的体现。在面对不同阶段的挑战时，中国共产党始终将人民的利益放在首位，积极采取措施保障人民的生命财产安全，体现了矛盾的特殊性，即关注人民群众的具体利益和需求。因此，中国共产党在处理各种矛盾和问题时，始终坚持以人民为中心的原则，这体现了矛盾的普遍性，即坚持人民立场、人民利益至上的原则在不同历史时期都具有普遍意义。通过这种方式，中国共产党实现了对人民的尊重、关怀和担当，真正诠释了“以人民为中心”的理念。 .	tie	b	b	tie	model_a	b
材料二 2023年3月21日至22日,中共中央政治局常委、国务院总理李强在湖南调研并主持召开先进制造规划发展座谈会。李强总理希望湖南加快打造国家重要先进制造业、具有核心竞争力的科技创新、内陆地区改革开放的高地,制造业一直是湖南省经济的根基所在、优势所在。近年来,全省制造业高质量发展步伐全面加快,打好产业基础高级化、产业链现代化攻坚战,推动制造业高质量发展。优化财税支持方式,加大对制造业支持力度:优化制造业企业金融生态,有效引导社会资本加大对制造业领域的投资。加快突破一批“卡脖子”关键核心技术,提升科技自立自强能力,提高自主可控、安全高效水平。紧盯碳达峰碳中和目标,坚决遏制”高污染,高耗能”项目盲目发展,加快淘汰落后产能,化解过剩产能,退出低效产能;深入实施制造业数字化转型行动,加大数字化,网络化,智能化技术改造力度,全面提升传统优势产业现代化水平;高质量参与“一带一路”建设,切实加强与R…	结合材料二，运用《经济与社会》，谈谈湖南如何才能打造成为国家先进制造业的高地。(12分)	优化营商环境，加大财税和金融支持力度，为制造业发展奠定坚实物质基础。深化科技与制造业融合，突破关键核心技术，提升制造业自主可控能力。推动供给侧结构性改革，数字赋能制造业，推动产业体系优化升级。顺应经济全球化潮流，深化国际合作，更好利用全球资源和市场，优势互补，提升湖南制造业国际竞争力。	要打造湖南成为国家先进制造业的高地，首先需要科技引领创新，提高核心竞争力。要加大科技研发力度，将科技创新融入产业中，加快产业现代化和高级化，逐步提高市场核心竞争力。其次，要优化财税支持方式，加大对制造业的支持力度。减税降税，减少企业的资金压力，引导社会资本对制造业领域的投资，有效推动制造业发展。最后，要积极参与国际贸易，强化区域合作。通过参与一带一路倡议，加强国际贸易合作，深化对外合作，实现产业发展和优势互补，共享发展。通过以上措施，湖南可以逐步打造成为国家先进制造业的高地。	要打造湖南成为国家先进制造业的高地，首先要坚持党的领导，发挥党总揽全局，协调各方的优势，领导湖南打造先进制造业。推进政策出台，为湖南提供支持力度，并且坚持党对其领导。其次，要推进科学的宏观调控和有效的政府治理，优化财政政策，加大对制造业支持力度，引导社会资本加大对制造业领域的投资，推动湖南制造业高质量发展。此外，要坚持新发展理念，坚持创新、绿色、开放发展，提高自主创新能力，推进绿色发展，加快淘汰落后产能，化解过剩产能。最后，要推进供给侧结构性改革，加大对外开放力度，形成更高水平的外向型经济，深入实施制造业数字化转型行动，全面提升传统优势产业现代水平，拓展产业契合点，从而使湖南成为国家先进制造业的高地。	a	a	湖南省为了打造成为国家先进制造业的高地，需要在多个方面下功夫。首先，湖南省可以继续优化财税支持方式，加大对制造业的支持力度，优化制造业企业的金融生态，有效引导社会资本增加对制造业领域的投资。例如，通过设立专项资金、税收优惠、贷款担保等措施，减轻制造业企业的财务压力，降低企业成本，提高企业的盈利能力。 其次，湖南省需要加快突破一批“卡脖子”关键核心技术，提升科技自立自强能力。例如，通过建立高新技术企业、科技园区等平台，吸引科研机构和企业合作，共同研发新技术、新产品。同时，加强与国内外知名大学和研究机构的合作，引进先进技术和人才，提升湖南省在高新技术领域的竞争力。 再次，湖南省需要紧盯碳达峰碳中和目标，坚决遏制“高污染、高耗能”项目的盲目发展，加快淘汰落后产能，化解过剩产能，退出低效产能。例如，通过实施绿色制造、循环经济等政策，鼓励企业采用清洁能源、节能减排技术，提高生产效率和产品质量。 最…	湖南要打造成为国家先进制造业的高地，首先需要加快推动制造业高质量发展。这包括优化产业基础，提升产业链现代化水平，加大对制造业的财税支持力度，优化企业金融生态，引导社会资本加大投资。同时，湖南还需要加快突破一批关键核心技术，提升科技自立自强能力，实现自主可控、安全高效的制造水平。 另外，湖南还应该紧盯碳达峰碳中和目标，遏制高污染、高耗能项目的盲目发展，加快淘汰落后产能，化解过剩产能，退出低效产能。同时，要深入实施制造业的数字化转型行动，加大数字化、网络化、智能化技术改造力度，提升传统优势产业的现代化水平。 此外，湖南还应当高质量参与“一带一路”建设，加强与RCEP成员国地方产业合作，强化中日韩区域合作，深化与欧美合作，拓展产业契合点和优势互补点。通过以上措施，湖南可以逐步打造成为国家先进制造业的高地。 。	b	a	a	b	stud_a	a
材料一 高中学生小琪的爸爸在一国有企业上班,妈妈开了一家小卖部,家里有一套房子出租,银行里有存款，还买了国债。下表是小琪家里某季度的收入情况：爸爸的工资、奖金妈妈的收入国债收益银行利息房屋租金分别为52000元、53500元、18200元、7300元、18500元	材料一中小琪的一家人获取收入的途径有哪些？	爸爸的工资、奖金属于劳动性收入，妈妈的收入属于经营性收入，国债、银行、房屋租金属于财产性收入。	收入主要包括财产性收入、劳动收入和经营收入。在要素分配中，劳动要素和资本要素按照劳动分配。	小琪的一家人获取收入的途径有以下几种：小英的爸爸在国有企业上班，获得工资和奖金作为劳动收入；小琪的母亲经营小卖部，获得收入作为经营性收入；家里出租房屋，获得租金收入；同时还有国债和银行存款利息作为生产性收入。	b	a	小琪的一家人获取收入的途径主要有以下几种： 1. 爸爸的工资：小琪的爸爸在一国有企业上班，根据提供的数据，他的工资为52000元。 2. 妈妈的收入：小琪的妈妈开了一家小卖部，这是她的自雇收入，具体金额为53500元。 3. 国债收益：小琪家还投资了国债，获得了18200元的收益。 4. 银行利息：他们在银行存款，获得了7300元的利息收入。 5. 房屋租金：家里有一套房子出租，租金收入为18500元。 这些都是小琪家人在该季度内通过不同的途径获得的收入。	小琪的一家人获取收入的途径包括爸爸的工资和奖金、妈妈的小卖部收入、国债收益、银行利息和房屋租金。这些收入来源可以分为工资收入、经营收入、投资收入和房产租金收入等不同类型。通过这些途径，小琪的家人可以获得稳定的经济来源。	tie	a	a	b	stud_a	a
材料二 党的二十大报告提出以中国式现代化全面推进中华民族伟大复兴的使命任务,从增进民生福祉、提高人民生活品质出发,强调就业是最基本的民生,社会保障体系是人民生活的安全网和社会运行的稳定器，对实施就业优先战略、健全社会保障体系作出专门部署，明确目标要求和工作任务。10年以来,我国社会保障体系建设进入快车道,建成具有鲜明中国特色、世界上覆盖人口规模最大、功能完备的社会保障体系,是社会保障改革力度最大、发展速度最快的时期。深入实施了全民参保计划，基本养老、失业、工伤保险参保人数分别达到10.5 亿人、2.4 亿人、2.9亿人。社保基金运行总体平稳,基金管理不断加强,2022年三项社会保险基金收支规模13.7万亿元,以全覆盖,保基本,多层次,可持续为目标的社会保障制度和体系全面加强,人民群众的基本生活和多样化需求得到了更加可靠的保障。当前,我国已经到了扎实推动共同富裕的历史阶段。我们要进一步织密…	某班同学看到材料二的信息,进行了讨论,有同学认为“社会保障是推进共同富裕的重要抓手,织密社会保障安全网有利于实现共同富裕”。请结合材料,运用经济与社会知识,对此同学的观点予以评析。	社会保障制度能保障社会成员的基本生活权利，够有效维护社会生活秩序的稳定，通过国民经济再分配，能调节不同群体之间的利益关系，化解社会矛盾和冲突，促进社会公平和正义，能充分发挥会互助的功能推动社会持续健康发展。因此，社会保障有利于实现共同富裕，但实现共同富裕不能仅仅依靠社会保障。实现全体人民的共同富裕归根到底要大力发展社会生产力。必须坚持社会主义基本经济制度，全面贯彻新发展理念，加快建设现代化经济体系，通过高质量发展推动实现全体人民共同富裕。	对于同学的观点，可以认为他的观点是正确的。通过建设健全的社会保障体系，可以确保人们的基本生活水平，有利于社会的公平发展。社会保障体系的完善可以促进共同富裕的实现，确保人们的基本生活需求得到可靠的保障。织密社会保障安全网，推进社会保障事业的高质量可持续发展，有助于实现共同富裕的目标。因此，加强社会保障制度的建设，是促进共同富裕的重要途径之一。	总的来说，该同学的观点是正确的。社会保障作为维护弱势群体利益的手段，可以提高人民生活品质，促进社会稳定，推动共同富裕的实现。我国坚持以人民为中心的发展思想，致力于推进社会保障更大程度的发展，这与实现共同富裕的目标是一致的。通过不断加强社会保障制度和体系，可以减轻贫富差距，保障人民群众的基本生活，推动共同富裕的进程。因此，织密社会保障安全网是实现共同富裕的重要抓手，对推动社会公平正义和促进经济社会可持续发展具有积极的意义。	b	b	回答开始： 首先，需要指出的是，材料二确实强调了社会保障体系在推进中华民族伟大复兴中的重要作用，特别是在增进民生福祉和提高人民生活品质方面。社会保障体系被视为人民生活的安全网和社会运行的稳定器，这一点体现在报告中对实施就业优先战略和健全社会保障体系的专门部署上。 从经济与社会知识的角度来看，社会保障体系确实是推进共同富裕的重要抓手。社会保障能够有效地减少贫困和不平等，通过提供基本的生活保障，如养老金、失业保险、医疗保险等，帮助弱势群体和低收入群体缓解生活压力，提高他们的生活质量。同时，社会保障体系的完善也有助于促进社会公平，减少社会不稳定因素，创造一个更加稳定和和谐的社会环境。 在材料二中提到的社会保障体系建设的成就中，基本养老、失业、工伤保险的参保人数达到10.5亿人、2.4亿人、2.9亿人，显示了社会保障体系的覆盖面和作用的广泛性。社保基金的运行总体平稳，基金管理不断加强，表明了社会…	根据材料二的内容，可以看出我国社会保障体系建设取得了显著成就，全面推进社会保障事业的发展对于实现共同富裕具有重要意义。社会保障体系的健全可以为广大人民群众提供可靠的保障，增强他们的获得感和幸福感，从而促进社会的和谐稳定和共同富裕的实现。比如，全民参保计划的深入实施、基本养老、失业、工伤保险参保人数的大幅增加等都为人民群众提供了更多的保障，提升了他们的生活质量。 然而，需要注意的是，社会保障体系的完善并非唯一推动共同富裕的因素。除了社会保障体系，还需要通过加强经济发展、改善收入分配机制、促进教育医疗等公共服务的均等化、加强社会福利等多方面政策的配合来实现共同富裕的目标。因此，织密社会保障安全网虽然是实现共同富裕的重要抓手之一，但仍需与其他政策相互配合，形成多维度、多层次的共同富裕推进机制。 综上所述，虽然社会保障是推进共同富裕的重要抓手，织密社会保障安全网有利于实现共同富裕，但需要与其他政…	b	b	b	b	model_a	b
抉择与奋斗。鸦片战争后,中国逐步成为半殖民地半封建社会。为了探索复兴之路,无数仁人志士,进行了各式各样的尝试，但终究未能改变旧中国的社会性质和中国人民的悲惨命运。1921 年，中国共产党诞生,中国革命面貌从此焕然一新。在近代以来中国人民开展救亡斗争的基础上,中国共产党带领全国人民夺取了新民主主义革命的伟大胜利，建立了中华人民共和国，彻底结束了旧中国半殖民地半封建社会的历史。改造与崛起在过渡时期总路线的指引下，中国共产党创造性地开辟了一条适合中国特点的社会主义改造道路，顺利实现了对生产资料私有制的社会主义改造，在中国建立起社会主义制度，实现了从新民主主义向社会主义的转变，完成了中华民族有史以来最深刻最伟大的社会变革。我国在社会主义建设的探索过程中，虽然经历了严重曲折，但党在社会主义革命和建设中取得的独创性理论成果和巨大成就，为在新的历史时期开创中国特色社会主义提供了宝贵经验、理论准备、物质…	结合材料并运用《只有社会主义才能救中国》的相关知识,就中国共产党为社会主义制度在中国的确立作出巨大贡献,撰写一篇研究报告。	中国共产党领导中国各族人民，在经历了大革命、土地革命战争、抗日战争和解放战争这四个阶段后，夺取了新民主主义革命的伟大胜利，建立了中华人民共和国，顺利实现了对生产资料私有制的社会主义改造，在中国建立起社会主义制度，完成了中华民族有史以来最深刻最伟大的社会变革。中国共产党在社会主义革命和建设中取得的独创性理论成果和巨大成就为在新的历史时期开创中国特色社会主义提供了宝贵经验、理论准备和物质基础。	中国共产党作为领导社会主义事业的先锋队，在推动社会主义制度在中国确立方面发挥了至关重要的作用。党始终坚持马克思主义中国化，深刻理解中国国情，根据实际情况制定并实施了一系列有效措施。 自1921年成立以来，中国共产党就致力于推动社会主义事业的发展，不断开展救国斗争，为社会主义制度的确立奠定了坚实基础。1949年中华人民共和国成立后，党又实施了三大改造，成功地实现了农业、手工业和资本主义工商业的社会主义改造，使生产资料私有制转变为公有制，从而确立了社会主义制度在中国的地位。 这一历史性成就是中国共产党领导下广大人民群众和中华民族通过艰苦卓绝的奋斗取得的。党不断进行自我革命，调整党内秩序，保持党的先进性和纯洁性，为社会主义事业的不断发展提供了坚实保障。 总之，中国共产党为社会主义制度在中国的确立作出了巨大的贡献，是中国社会主义事业的领航者和中流砥柱。在未来的发展中，党将继续紧密团结广大人民群众…	中国共产党在中国社会主义制度确立过程中发挥了重要作用。在新中国成立后，党领导人民进行了一系列改革和建设工作，如土地改革、镇压反革命、三反五反等，确保了社会主义制度的顺利推进。特别是在改革开放时期，中国共产党坚持走中国特色社会主义道路，不断探索适合中国国情的发展道路。通过实施改革开放政策，中国取得了举世瞩目的经济成就，成功建立了社会主义市场经济体制。 中国共产党的领导下，中国社会主义制度在各个领域取得了巨大成就。在政治领域，党建立了中国特色社会主义政治制度，保障了人民民主权利，维护了国家长治久安。在经济领域，中国共产党坚持走社会主义市场经济道路，实现了经济的快速增长和社会的全面发展。在文化领域，党积极倡导社会主义核心价值观，加强了国家文化软实力建设，推动了社会主义文化的繁荣发展。 总的来说，中国共产党为社会主义制度在中国的确立作出了巨大贡献。党的正确领导下，中国社会主义制度在中国实现了伟大…	a	a	研究报告：中国共产党的贡献与社会主义制度的确立 摘要： 本报告旨在探讨中国共产党如何在鸦片战争后的半殖民地半封建社会中，领导中国人民走向社会主义制度的确立。通过分析中国共产党的奋斗历程、理论创新以及实践成果，本报告将阐述党在社会主义革命和建设中的独创性贡献，并论证《只有社会主义才能救中国》的相关知识在这一过程中的重要性。 一、中国共产党的奋斗历程与理论创新 中国共产党的成立标志着中国革命面貌的焕然一新。自1921年成立以来，党领导了新民主主义革命，推翻了旧中国的半殖民地半封建社会，建立了中华人民共和国。党在这一过程中，创造性地开辟了一条适合中国特点的社会主义改造道路，实现了从新民主主义向社会主义的转变。 二、社会主义制度的确立与中国共产党的贡献 中国共产党的领导下，中国成功实现了对生产资料私有制的社会主义改造，建立起社会主义制度。这一成就的背后，是党在理论创新和实践中的巨大努力。党的理论…	在中国共产党的领导下，中国实现了从旧中国半殖民地半封建社会向社会主义社会的转变，实现了中华民族的伟大复兴。中国共产党在社会主义制度在中国的确立过程中，作出了巨大的贡献。 首先，中国共产党领导人民进行了新民主主义革命，成功推翻了国民党反动派的统治，建立了中华人民共和国。这为社会主义制度的确立奠定了基础。中国共产党在革命战争中展现出了坚强的领导力和组织能力，团结了全国人民，取得了革命的胜利。 其次，中国共产党实行了社会主义改造，对生产资料私有制进行了彻底改革。通过土地改革、镇压反革命和资产阶级的反抗等一系列措施，成功建立了社会主义经济基础，为社会主义制度的确立提供了坚实的基础。 此外，中国共产党在社会主义建设的过程中，提出了一系列独具中国特色的理论和政策，如社会主义初级阶段理论、改革开放政策等。这些理论和政策使中国的社会主义建设更加符合中国国情，取得了显著的成就。 综上所述，中国共产党在社会…	b	a	a	b	stud_a	a
“天眼”、大数据与立体交通“三变”以及山地公园省、多彩贵州风“两新”成为当今世界对贵州的新认识，颠覆了贵州“地无三尺平、天无三日晴、人无三分银”的旧形象。山还是过去的山，水也是过去的水，这块中国的宝地，何以从昔日让人抬不起头，变成今天中国人的骄傲？这得益于贵州锐意创新改革,在人民增收、加速发展等方面打破瓶颈,实现了综合经济实力、决战脱贫攻坚、基础设施建设、改革开放创新和增进民生福祉五大推进。目前,贵州与全球190多个国家和地区开展经贸往来。“江南千条水,云贵万重山。五百年后看,云贵胜江南。”如今的贵州人常引用明代刘伯温的诗来表达自己的信心和期待。	结合材料,运用伟大的改革开放的知识,谈谈改革开放对贵州发展的作用。	改革开放极大解放和发展了社会生产力，增强了社会活力，激发了广大人民群众的创造性，增强了贵州与世界的联系，极大改变了贵州的面貌、贵州人民的面貌，使贵州人民实现了从温饱不足到小康富裕的伟大飞跃。实践充分证明，改革开放是贵州大踏步赶上时代的重要法宝，是实现快速发展的必由之路，是决定当代贵州命运的关键一招。	改革开放是中国特色社会主义的必由之路。贵州从“地无三尺平、天无三日晴、人无二分银”的旧形象逐渐转变为“天眼”、“三变”、“两新”，重新塑造了世界对贵州的认识。改革开放极大地改变了中华民族的面貌，也让贵州这种回处环山、交通不便、经济落后的地区加快发展起来。在决战联盘政策的坚定支持下，贵州不断提升综合经济实力，加强基础设施建设，推动改革开放创新，致力于增进民生福祉。通过改革开放，贵州推进了创新改革，提高了人民收入，促进了贵州与海外的经济往来。目前，贵州已与全球190多个国家和地区开展了经贸往来，进一步推动了贵州的发展。	改革开放对贵州发展起到了至关重要的作用。首先，通过利用本地资源优势吸引外部投资和合作发展，促进了贵州经济快速发展，实现了经济高质量发展。其次，贵州积极推动科技创新，将创新置于发展的核心位置，天眼、大数据等领域得到迅速发展，为贵州经济的持续增长提供了强大动力。另外，贵州响应国家政策，积极参与全球经济发展，与全球开展经贸往来，为贵州的对外贸易往来提供了更广阔的发展空间。总的来说，改革开放为贵州的发展打开了新的局面，使贵州在经济、科技和对外贸易领域取得了显著的成就。	a	a	改革开放是中国发展史上的一个重大转折点，对贵州的发展产生了深远的影响。自1978年中国实施改革开放政策以来，贵州省在经济建设、社会发展、民生改善等方面取得了显著成效。 首先，改革开放为贵州的经济发展提供了新的动力。通过实施市场化改革，贵州省推动了经济结构的优化升级，发展了特色产业，如水电、旅游、林业等。例如，贵州的水电资源丰富，通过大力发展水电产业，贵州不仅解决了能源短缺的问题，还为国家的能源安全做出了贡献。 其次，改革开放促进了贵州的基础设施建设。随着对外开放的加深，贵州省加大了对交通、通信、能源等基础设施的投资。例如，贵州省的高速铁路、公路网络的建设和升级，极大地促进了区域内的经济一体化和对外开放。 再次，改革开放推动了贵州的社会进步。通过改革开放，贵州省在教育、医疗、文化等领域取得了显著进步。例如，贵州省在教育领域的改革开放，推动了教育公平和质量提升，提高了居民的教育水平。 最后，…	改革开放政策的实施为贵州的发展提供了重要的动力和机遇。通过改革开放，贵州得以融入全球化的经济体系，与国际社会建立了更加紧密的联系。改革开放政策的推动下，贵州大力发展了产业，加快了基础设施建设，提高了人民的生活水平。同时，改革开放还带来了更多的投资和技术进步，促进了贵州经济的快速增长。通过不断地开放与改革，贵州的经济实力得到了提升，人民生活水平得到了改善，社会稳定和谐。总的来说，改革开放为贵州的发展注入了新的活力和动力，使得贵州在国内外的地位和影响力不断提升，成为中国的骄傲。	a	a	b	tie	tie	tie
当前，中国是世界第二大货物贸易进口国、第二大服务贸易进口国，货物和服务年进口 值均占全球 1/10 左右。2018 年 11 月，中国进一步降低石材、陶瓷、机电等 1585 个税目商品的最惠国税率，关税总水平由 2017 年的 9.8%降至 7.5%，平均降幅达 23%。同月，全球首个以进口为主题的国家级展会——中国国际进口博览会在上海举行，来自 170多个国家、地区的 3600 多家企业参展，现场展示了法国葡萄酒、阿根廷红虾、美国智能车载空气净化器……进博会吸引了 40 多万名境内外采购商，累计意向成交 578. 3 亿美元，其中 1/4 以上为智能及高端设备。中国扩大进口“大蛋糕”的清单上，既包括数控机床、智能终蜗、精密医疗设备、新型汽车、先进民用飞机等高技术产品,也包括个人电子产品、农产品、食品、服装、化妆品等日用消费品。	结合材料并运用经济生活知识,说明中国进一步扩大进口对国内经济的积极影响。	降低关税，增加进口，繁荣生产与消费市场，激发市场竞争，促进供给侧结构性改革，推动产业转型升级，丰富消费品市场供给，降低消费成本，更好满足消费者美好生活需要，带动技术引进，促进产品创新研发，推进经济发展动能转换。	扩大进口对国内经济的积极影响体现在多个方面。首先，通过扩大内需，可以满足人们多样化的需求，刺激消费增长，进而促进国内经济增长。其次，这有利于提高企业发展意识，促使企业加大研发投入，提高自主创新能力，形成良性竞争，从而推动国内经济发展。同时，扩大进口也能吸引更多采购商、消费者和企业，增加利润，进而促进经济平稳运行。此外，保障国内供求需求，避免通货膨胀或紧缩，有利于维护国内经济稳定。最重要的是，扩大进口可以提高效率，在不断做大蛋糕的同时分好蛋糕，保证效率与公平，这才是正确发展经济的道路。通过深化供给性结构性改革，吸引更多投资，壮大我国经济实力，进而促进国内和国际双循环。	进一步扩大进口对国内经济有着积极影响。通过举办中国国际进口博览会，引进更高端设备，可以推动国内经济朝着更高水平发展。同时，进一步扩大进口也可以促进商品技术产品的流入，提高中国产品质量，扩大消费市场。例如，进博博览会吸引了40多万国内外采购商和众多企业参展，有利于提升中国商品的国际竞争力。 此外，进一步促进进口也有助于推进经济全球化朝着更加开放、包容、普惠、共赢的方向发展。通过加强国际交流与合作，推动经济全球化进程，中国可以更好地融入全球经济体系，获取更多发展机遇，助推国内经济的发展。因此，中国进一步扩大进口对经济发展具有重要意义，有助于推动国内经济持续增长。	a	a	中国进一步扩大进口对国内经济产生了积极影响，主要体现在以下几个方面： 1. 提升国内产业升级：通过降低关税，中国吸引了更多的高技术产品进口，如数控机床、智能终端、精密医疗设备等，这些产品对于中国本土产业的技术升级和创新具有重要意义。例如，进口的高端机床可以提高中国制造业的生产效率和产品质量，从而推动中国制造业向高端制造转型。 2. 增强消费者选择：进口的日用消费品，如个人电子产品、农产品、食品、服装、化妆品等，可以为消费者提供更多样化的选择，提高生活质量。同时，这也为国内的零售和服务业带来了新的增长点。 3. 促进国际贸易平衡：中国作为世界第二大货物贸易进口国，扩大进口有助于平衡国际贸易，减少贸易摩擦，提升国际贸易的稳定性和可持续性。 4. 增强国内外市场的互联互通：举办中国国际进口博览会（进博会）不仅展示了中国对外开放的决心，也为国内外企业提供了一个交流合作的平台。通过进博会，中国与世…	中国进一步扩大进口对国内经济有着多种积极影响。首先，进口的增加可以带动国内产业升级和技术进步。通过引进更先进的技术和设备，中国企业可以提高生产效率，降低生产成本，提高产品质量，从而增强竞争力。其次，进口可以丰富国内市场的产品种类，提高消费者的选择权，满足不同层次、不同需求的消费者。同时，进口也可以促进国内产业结构调整，激励企业不断提高自身水平，以适应国际市场的竞争。此外，进口还可以促进国内就业，例如扩大进口消费品可以刺激国内零售业和物流业的发展，创造更多就业机会。总的来说，通过进一步扩大进口，中国可以有效推动经济的转型升级，提高国内生产力水平，实现经济的可持续增长。	a	a	a	a	stud_a	a
党的十八大以来，以习近平同志为核心的党中央把脱贫攻坚工作纳入“五位一体”总体布局和“四个全面”战略布局，全面打响脱贫攻坚战。《中共中央国务院关于打赢脱贫攻坚战的决定》强调,打赢脱贫攻坚战要坚持以下基本原则：一是坚持党的领导，夯实组织基础；二是坚持政府主导，增强社会合力：三是坚持精准扶贫，提高扶贫成效：四是坚持保护生态，实现绿色发展：五是坚持群众主体，激发内生动力；六是坚持因地制宜，创断体制机制。截至2018年末,全国农村贫困人口从2012年末的9899万人减少至1660万人,累计减少8239万人;贫困发生率从2012年的10.2%下降至1.7%,累计下降8.5 个百分点。	我国脱贫攻坚取得决定性进展,是贯彻落实上述六项基本原则的结果。运用政治生活知识,任选其中三项原则,分别阐述坚持这些原则的理由。	消除贫困、改善民生、逐步实现共同富裕，是社会主义的本质要求，是党的重要使命。党是领导一切的，在脱贫攻坚中发挥总览全局、协调各方的领导核心作用，各级党组织是脱贫攻坚的坚强政治保证。政府负有经济、社会等方面建设的重要职能。只有广泛吸纳社会力量、整合社会资源，鼓励先富帮后富，才能汇聚全社会广泛参与脱贫攻坚的磅礴之力。精准扶贫是实现脱贫目标的工作机制。只有提高扶贫成效，才能切实提高扶贫成果可持续性，让贫困人口有更多的获得感。生态保护是为了满足人民群众对优美生态环境的需要。只有走生态优先、绿色发展道路，才能让贫困人口从生态建设中得到更多实惠。从群众中来到群众中去是党的根本的领导方法和工作方法。只有调动贫困地区干部群众积极性、主动性、创造性，才能增强贫困人口自我发展能力。一切从实际出发、求真务实是党和政府的工作作风。只有不断创新和改进工作方式，才能提高扶贫效率，使扶贫脱贫工作经得起实践、群众和历史的…	①坚持党的领导，夯实组织基础.①坚持政府主导，增强社会合力③坚持群众主体，激发人民群众积极性。理由：①坚持党的领导,各项事件用的小前提也是中华民族的历史选择②、坚持政府主导有助于提开决策的优化效率.能更好的适应社会市场需要、是人民的选择②坚持群众主体，因为人民群是历史的创造者，社会变革的主力军	①坚持党的领导，因为中国共产党是我国的执政党、坚持科学执政和依法执政、立党为公执政为民②坚持原则：坚持政府主导、因为政府具有社会经济建设的职能、坚持依法执政、构建法治化政府和阳光型政府、坚持从人民群众中来到人民群众中去的工作方法。③坚持群众路线，激发人民力量.因为我国是人民民主专政的社会主义国家、其本质是人民当家作主	b	b	首先，我将选取坚持党的领导、精准扶贫和群众主体这三项原则，分别阐述其在脱贫攻坚中的重要性和作用。 一、坚持党的领导 党的领导是中国特色社会主义最本质的特征，也是中国特色社会主义事业的根本保证。脱贫攻坚作为国家战略性的工作，必须坚持党的领导，确保工作的方向、重点、力度和效率。党的领导体现在党的组织体系的覆盖和党的工作的深入，通过党组织的领导，确保脱贫攻坚工作的顺利进行，避免工作中的偏差和错误。例如，党组织在乡镇、村庄建立了党组织，通过党组织的领导，确保了扶贫资金的使用和项目的实施，有效地推动了脱贫攻坚工作的深入开展。 二、坚持精准扶贫 精准扶贫是指根据贫困人口的具体情况，精准识别、精准施策、精准监测，确保扶贫资源的高效利用和扶贫成效的最大化。精准扶贫原则的实施，能够确保扶贫资金和资源的精准投入，避免资源的浪费和效益的低下。例如，通过建立贫困人口的详细数据库，精准识别贫困户，实施针对性的扶贫…	首先，我们选取第一条原则，即坚持党的领导，夯实组织基础。这一原则的重要性在于党的领导是脱贫攻坚工作取得成功的关键。只有通过党的领导，才能确保各级政府和相关部门有效协调合作，形成合力推动脱贫工作。党的领导也能够确保脱贫工作的长期性和持续性，避免因为领导层面的变化而影响到脱贫工作的进展。 其次，我们选取第三条原则，即坚持精准扶贫，提高扶贫成效。精准扶贫是脱贫攻坚工作的核心，只有精确识别贫困人口和贫困原因，才能制定出有针对性的扶贫措施，确保扶贫政策精准到位，避免资源浪费和效果不明显的问题。通过精准扶贫，可以确保扶贫工作真正惠及到有需要的人群，提高扶贫的实效性和可持续性。 最后，我们选取第五条原则，即坚持群众主体，激发内生动力。脱贫工作的目的是让贫困群众脱贫致富，因此必须充分尊重和发挥贫困群众的主体作用。只有通过让贫困群众参与脱贫工作的决策制定和实施过程中，才能激发他们的内生动力，增强他们脱贫的…	tie	b	b	tie	model_a	b
历史上，风沙、盐碱、内涝肆虐，兰考民生艰难、百姓贫苦。上世纪六十年代，“县委书记的好榜样”——焦裕禄依靠群众，开启治理“三害”的征程，改善了兰考自然环境，形成了“亲民爱民、艰苦奋斗、科学求实、迎难而上、无私奉献”的焦裕禄精神。2014 年，在党的群众路线教育实践活动中，习近平总书记选择兰考作为联系点，叮嘱当地干部要切实关心贫困群众，带领群众艰苦奋斗，早日脱贫致富。“改变兰考贫困的面貌，让百姓过上好日子。”兰考县委牢记总书记嘱托，把脱贫作为第一民生工程，提出了“三年脱贫，七年小康”的奋斗目标。兰考广大党员干部密切联系群众,深入调查研究,找到了制约经济发展的瓶颈,制定了切实可行的脱贫措施。在焦裕禄精神的鼓舞下，兰考人民团结奋斗，因地制宜，创造性地建立“公司+贫困户” “经营大户+贫困户”等模式,发展温室大棚种植、畜牧业、民族乐器制作等产业,打赢了艰苦卓绝的脱贫攻坚战。2017年,兰考在河南省…	结合材料并运用唯物史观知识,说明在脱贫致富实践中兰考县委是如何贯彻群众路线的。（12分）	群众路线是我们党的根本的领导方法和工作方法，一切为了群众，一切依靠群众，从群众中来，到群众中去。兰考县委心系群众，把扶贫脱贫作为第一民生工程，深入群众调查研究，从群众中获取智慧和办法，带领群众艰苦奋斗，充分发挥群众的积极性、主动性和创造性。	兰考县委在脱贫致富实践中贯彻群众路线的表现主要体现在以下几个方面。首先，兰考县委注重联系具有普遍性，深入了解当地情况，制定切实可行的脱贫方案，避免孤立地看问题。其次，兰考县委坚持具体问题具体分析，根据当地情况和国家能力找到最佳解决方案，力求实现真正的脱贫致富。同时，兰考县委始终坚持群众观点和群众路线，党员干部密切联系群众、深入调查研究，制定切实可行的措施，确保脱贫工作符合群众实际需求。最后，通过不断实践和尝试，兰考县委寻找最优解决办法，在前进中不断发展，始终坚持为人民服务的宗旨，不断推动脱贫事业取得实质性进展。兰考县委的做法充分体现了唯物史观的指导思想，为脱贫致富实践提供了有力的支持和保障。	兰考县委在脱贫致富实践中贯彻群众路线，始终把人民群众利益作为最高价值标准，关心贫困群体，带领群众艰苦奋斗，早日脱贫致富。同时，坚决反对脱离群众路线的任何风气倾向，要求广大党员干部密切联系群众，深入调查研究，制定切实可行的脱贫措施。 兰考县委认识到人民群众是社会物质财富的创造者，是社会变革的决定力量。受到焦裕禄精神的鼓舞，兰考人民团结奋斗，因地制宜，打赢了艰苦卓绝的脱贫攻坚战。在实践中，兰考县委不忘初心，始终以群众路线为指导，不断推动脱贫致富工作取得实实在在的成效。	b	b	在脱贫致富实践中，兰考县委贯彻群众路线的主要体现在以下几个方面： 1. 密切联系群众：兰考县委始终坚持以群众为中心，广大党员干部深入基层，密切联系群众，深入调查研究，了解群众的实际需求和困难。这体现了唯物史观中的历史唯物主义观点，即社会存在决定社会意识，通过了解群众的实际情况，县委能够更好地把握问题的本质，制定出切实可行的脱贫措施。 2. 找出制约发展瓶颈：通过深入调查研究，兰考县委找到了制约经济发展的瓶颈，这是对现实情况的科学分析和认识。唯物史观强调物质生产是社会发展的基础，县委通过分析瓶颈，能够针对性地解决问题，推动经济发展。 3. 制定脱贫措施：兰考县委根据调查研究的结果，制定了切实可行的脱贫措施。这体现了唯物史观中的实践观，即理论是由实践产生的，县委通过实践活动来不断完善和发展理论。 4. 建立创新性产业模式：兰考县委鼓励和支持发展温室大棚种植、畜牧业、民族乐器制作等产业，建立了…	在脱贫致富实践中，兰考县委贯彻群众路线体现在多个方面。首先，兰考县委深入基层，密切联系群众，深入了解贫困群众的实际需求和困难，通过调查研究找到了制约经济发展的瓶颈，制定了切实可行的脱贫措施。其次，兰考县委注重群众的主体地位，积极倡导群众参与脱贫工作，通过建立“公司+贫困户”、“经营大户+贫困户”等模式，让贫困群众参与到产业发展中来，实现了群众自我发展、自我脱贫的目标。再次，兰考县委在脱贫致富实践中充分发挥了党的领导核心作用，引领全县人民团结奋斗，因地制宜，创造性地发展产业，取得了显著成效。最后，兰考县委在实践中不断总结经验，完善措施，实现了脱贫攻坚工作的艰苦卓绝，最终成功摘掉了贫困县的帽子，入选中国“幸福百县榜”，实现了群众的共同富裕。 。	b	tie	b	b	tie	b
历史上，风沙、盐碱、内涝肆虐，兰考民生艰难、百姓贫苦。上世纪六十年代，“县委书记的好榜样”——焦裕禄依靠群众，开启治理“三害”的征程，改善了兰考自然环境，形成了“亲民爱民、艰苦奋斗、科学求实、迎难而上、无私奉献”的焦裕禄精神。2014 年，在党的群众路线教育实践活动中，习近平总书记选择兰考作为联系点，叮嘱当地干部要切实关心贫困群众，带领群众艰苦奋斗，早日脱贫致富。“改变兰考贫困的面貌，让百姓过上好日子。”兰考县委牢记总书记嘱托，把脱贫作为第一民生工程，提出了“三年脱贫，七年小康”的奋斗目标。兰考广大党员干部密切联系群众,深入调查研究,找到了制约经济发展的瓶颈,制定了切实可行的脱贫措施。在焦裕禄精神的鼓舞下，兰考人民团结奋斗，因地制宜，创造性地建立“公司+贫困户” “经营大户+贫困户”等模式,发展温室大棚种植、畜牧业、民族乐器制作等产业,打赢了艰苦卓绝的脱贫攻坚战。2017年,兰考在河南省…	班级学习园地“如何学习焦裕禄艰苦奋斗精神”栏日征稿,请列举两个写作要点。	志存高远，脚踏实地，不畏困难，顽强拼搏，勇于探索，创新创造。	1. 焦裕禄的精神具体体现了那个时代的特殊意义，他的艰苦奋斗、廉洁清廉、无私奉献等品质，成为了当时社会风气的典范和楷模。 2. 青少年要学习焦裕禄的精神，就要从自身做起，培养艰苦奋斗的意志品质，树立正确的人生观和价值观，努力学习、奋发向上，为建设美好家园贡献自己的力量。	1. 勇于奋斗，迎难而上。焦裕禄同志在工作中总是敢于面对困难和挑战，毫不畏惧，坚定地向前推进。这种勇于奋斗的精神激励着我们，让我们明白只有敢于拼搏、迎难而上，才能取得成功。 2. 关爱群众，无私奉献。焦裕禄同志以自己的实际行动践行着“为人民服务”的宗旨，时刻关注群众的生活和需求，无私地奉献自己，为群众谋福祉。这种关爱群众、无私奉献的精神是我们学习的榜样，让我们深刻领会到只有真心实意为人民群众谋利益，才能真正做到心系群众、服务群众。	b	b	写作时，可以围绕以下两个要点来展开： 1. 焦裕禄的艰苦奋斗精神及其对兰考的影响 - 描述焦裕禄如何在面对风沙、盐碱、内涝等自然灾害时，依靠群众的力量，开启了治理“三害”的征程，并改善了兰考的自然环境。 - 强调焦裕禄精神的核心价值观：“亲民爱民、艰苦奋斗、科学求实、迎难而上、无私奉献”，并通过具体事例说明这些精神是如何激励兰考人民团结奋斗，共同克服困难的。 - 引用习近平总书记在党的群众路线教育实践活动中对兰考的关注，以及兰考县委提出的“三年脱贫，七年小康”的奋斗目标，说明焦裕禄精神的持续影响力和当代的实际应用。 2. 通过实践实现脱贫与小康的案例 - 介绍兰考人民通过创新的产业模式，如“公司+贫困户”、“经营大户+贫困户”等，发展温室大棚种植、畜牧业、民族乐器制作等产业，如何有效地解决了经济发展的瓶颈。 - 分析兰考在河南省率先摘掉贫困县的帽子，并入选中国“幸福百县榜”的成就，说明通…	1. 焦裕禄艰苦奋斗精神的内涵：可以从焦裕禄依靠群众、以身作则、无私奉献等方面展开，解读他的精神是如何在兰考脱贫攻坚中发挥作用的。 2. 焦裕禄艰苦奋斗精神的启示：可以从个人奋斗、团结合作、迎难而上等角度分析，探讨这种精神对我们当下的学习、生活、工作等方面有何启示和借鉴意义。 。	b	a	b	b	stud_a	b
“十四五”时期我国产业结构变动趋势预测:年份2019 2020 2021 2022 2023 2024 2025第一产业(%)7.17.77.37.06.86.66.5第二产业（%）38.637.837.336.936.436.035.5第三产业(%)54.354.555.456.156.857.458.0	解读材料所包含的经济信息。	图表预测，在“十四五”期间，我国第一产业和第二产业所占比例整体上呈下降趋势，第三产业所占比重持续上升，产业结构不断优化。	在“十四五”时期，我国的产业结构变动趋势明显，呈现出不断上升的态势。预测显示，第三产业将占据最大比重，第二产业次之，第一产业则占比最小。	在“十四五”时期，我国的内产业结构正朝着优化的方向变动，第一、二产业的占比减少，而第三产业的占比增加。这一趋势得益于我国生产力的提高和经济高质量发展的推进，同时也受益于供给侧结构性改革政策的实施。	b	b	根据提供的数据，"十四五"时期中国的产业结构正在经历一系列变化。从2019年到2025年，我们可以看到第一产业的比重逐年下降，而第二产业和第三产业的比重则逐渐上升。 第一产业的比重从2019年的7.17%降低到2025年的6.5%，这表明农业、林业和渔业等传统农业部门在国民经济中的作用逐渐减弱。这种趋势可能是由于农业生产效率的提高和工业化进程的加快导致的。 第二产业的比重从2019年的38.63%降低到2025年的35.5%，这意味着制造业、建筑业等产业的比重在逐渐下降。这种变化可能是由于中国经济从依赖制造业向服务业转型的过程中所体现的。 第三产业的比重则从2019年的54.35%增加到2025年的58.0%，这表明服务业在国民经济中的作用日益增强。服务业的增长可能是由于消费升级、科技进步和国际贸易的发展带来的。 总体来看，这些数据反映了中国经济结构的优化和升级，服务业成为推动经济增长的…	根据材料显示，从2019年到2025年，我国的产业结构呈现出以下变化趋势： 1. 第一产业的比重逐渐下降，从2019年的7.1%降至2025年的6.5%，这表明农业在国民经济中的比重逐渐减小，可能是由于城市化进程加快，农业劳动力向城市转移等因素所致。 2. 第二产业的比重也在逐年下降，从2019年的38.6%降至2025年的35.5%，这可能是由于制造业结构调整，产业升级等因素导致的。 3. 第三产业的比重逐渐增加，从2019年的54.3%增至2025年的58.0%，这表明服务业在国民经济中的比重逐渐增加，可能是由于消费结构升级，人民生活水平提高等因素所致。 综合来看，我国产业结构变动的趋势是第一、第二产业比重逐渐减小，第三产业比重逐渐增加，经济结构逐渐向着服务业和高附加值产业转变。这种产业结构变动可能会对我国经济增长、就业结构、城乡发展等方面产生深远影响。 。	tie	tie	tie	b	stud_a	b
近年，某社区党总支以党建为龙头，成立多个特色党小组，推行网格化党建“六民”服务，设立邻里守望、水电维护等五个网格党建服务点，搭建便民服务、日间照料、党建联席等平台，打造全市首个家风文化展示区。不断创新“党建+服务”机制，做优特色党建品牌，真心实意解民忧、惠民生。开展基层“行动党支部”建设,持续深化“三个一线”行动、机关能力作风建设“五大行动”，努力把每个基层党组织都建设成为推动发展、服务群众、凝聚人心的坚强堡垒。城乡社区把党组织建在网格里、建在楼栋里、建在群众自治组织里,充分发挥网格、微网格和党员志愿者作用,调动各方力量参与社区建设,让基层党组织在疫情防控、推动发展、服务群众等方面发挥更大作用，不断夯实筑牢基层底板，发挥基层党组织领导核心作用，以实际行动迎接党的二十大胜利召开。	结合材料，运用政治生活知识，说明某社区是如何发挥基层党组织领导核心作用的。	在基层治理中加强党的全面领导，充分发挥党总揽全局、协调各方的作用，调动各方力量参与社区建设。多渠道搭建平台，创新机制，打造党建品牌，着实加强基层党的建设。坚持以人民为中心，把群众路线贯彻到基层治理全过程，有效发挥基层各主体作用，打造共建共治共享的基层治理新格局。践行党的宗旨，发挥基层党员先锋模范作用和基层党组织的战斗堡垒作用，巩固党的领导核心地位。	某社区充分发挥基层党组织领导核心作用的方式有以下几个方面：首先，坚持党的领导，以人民为中心，为人民谋幸福利益。该社区以党建为龙头，推行网络化党建“六民”服务，确保党的政策和决策落实到每个居民。其次，坚持群众路线，为人民服务。在疫情期间，基层党组织在推动社区发展、服务群众等方面发挥着更大作用，始终将群众的需求放在首位。再者，始终坚持党领导全局，充分发挥网格、微网格和党员志愿者的作用，调动各方力量参与社区建设，确保党的政策贯彻执行。最后，加强党建不断创新，使基层党组织能够更好地深入群众服务，从而发挥好基层堡垒作用，为社区的发展和稳定作出积极贡献。	在某社区，党组织始终发挥着领导核心作用。首先，党组织坚持中国共产党是工人阶级先锋队，是中华人民和中国人民的先锋队地位，以党建为龙头，引领和推动社区发展。其次，党组织坚持基层自治组织自我服务、自我管理、自我教育，促进社区自治和居民自治，真心实意解决民生问题，让居民感受到党组织的关怀和服务。再者，党组织坚持我国的本质是人民当家作主，积极倾听民意，解决居民的实际困难，努力提高居民的幸福感和获得感。最后，党组织牢固坚持人民民主专政的理念，让人民群众参与社区事务管理，共同推动社区建设和发展，真心实意解决民生问题，惠民生。可以说，在这个社区中，党组织发挥着核心领导作用，为居民提供了强大的政治引领和服务保障。	a	a	某社区通过将党组织建在网格、楼栋和群众自治组织中，充分发挥了网格、微网格和党员志愿者的作用，有效地调动了各方力量参与社区建设。例如，在疫情防控方面，社区通过建立网格党建服务点，如邻里守望和水电维护等，确保了居民的日常生活需求得到及时满足，同时也增强了社区的防疫能力。 在推动发展方面，社区通过开展基层“行动党支部”建设，深化了“三个一线”行动和机关能力作风建设“五大行动”，使得每个基层党组织都成为推动发展的坚强堡垒。例如，通过党建联席会议的平台，社区能够及时收集群众意见和建议，推动解决实际问题，促进社区经济社会的可持续发展。 在服务群众方面，社区通过创新“党建+服务”机制，打造了特色党建品牌，如家风文化展示区，真心实意地解民忧、惠民生。例如，社区通过日间照料服务点，为老年人提供了便捷的生活服务，提升了他们的生活质量。 总之，某社区通过这些措施，有效地发挥了基层党组织的领导核心作用，确保了党…	某社区通过成立特色党小组、推行网格化党建服务、设立党建服务点等举措，有效发挥基层党组织领导核心作用。首先，通过建立党小组和网格化服务体系，基层党组织能够深入到社区中，了解居民的需求和问题，及时解决矛盾和困难，真正做到服务群众、解民忧。其次，设立党建服务点和搭建各种便民平台，使党组织在社区中发挥引领作用，通过开展各项活动和服务项目，凝聚人心，提升社区凝聚力和向心力。最后，通过开展“行动党支部”建设和深化机关能力作风建设等举措，使基层党组织在推动发展、服务群众等方面发挥更大作用，提升党的凝聚力和战斗力。综上所述，某社区充分发挥基层党组织的领导核心作用，以实际行动迎接党的二十大胜利召开。 。	a	a	a	a	stud_a	a
习近平总书记强调：“守望相助、扶危济困是中华民族的传统美德”“支持志愿服务、慈善事业健康发展”。党的十八大以来，在以习近平同志为核心的党中央坚强领导下，我国制定实施慈善法,推动慈善组织有序发展,慈善事业取得长足进步,慈善力量在打赢脱贫攻坚战、全面建成小康社会、支持民生兜底保障和社会福利事业、助力新冠肺炎疫情防控等方面发挥了积极作用。2022年9月1日,由中华慈善总会组织开展的2021年度全国慈善会系统先进评选结果出炉。武汉伟鹏控股有限公司 2021 年度共捐款 6561 万元，表彰为“全国慈善会系统爱心企业”。伟鹏集团在董事长喻鹏的带领下，近五年累计捐款捐物1.7亿元。企业是慈善事业的重要主体。企业的慈善行为是企业自愿为社会及受益人提供无偿社会救助、援助。企业从社会获得商业利益,企业的慈善投入源于其商业利益,企业参与慈善事业，可以为国家、社会排忧解难，有利于全面建设小康社会，共同富裕，促…	发展慈善事业是社会文明进步的重要标志。结合材料并运用文化生活知识对此加以说明。	中国传统思想对当代中国人的价值观念、生活方式和社会发展具有深刻影响。发展慈善事业，有利于弘扬优秀传统慈善思想。有利于加深人们对慈善事业的认识，提高思想道德修养，增强参与慈善活动的积极性，践行社会主义核心价值观。有利于弘扬传统美德，传播慈善文化，在全社会营造良好的文化氛围，推动慈善事业在全面建设社会主义现代化国家新征程中更好地发挥作用。	发展慈善事业是社会文明进步的重要标志。文化作为一种精神力量，对社会的发展起到推动作用。在新冠肺炎疫情防控中，优秀的文化为我们提供了帮助。中华文化博大精深，强调“守望相助、扶危济困”等传统美德，这种精神也促进了慈善事业的发展。我国坚持走中国特色社会主义文化发展道路，致力于推动慈善事业的发展。通过推动慈善事业，可以促进思想道德建设，进一步提升社会文明水平，推动社会进步。	，发展慈善事业可以促进社会的和谐稳定，增强社会凝聚力，有利于政治经济的健康发展。③文化是社会文明的重要标志，发展慈善事业可以提升社会的文明程度，展现社会的人道主义精神和社会责任感。④总之，发展慈善事业对于社会的文明进步具有重要意义，可以促进社会的和谐发展，提升人们的思想道德素质，增强社会凝聚力，体现社会的人文关怀。	a	a	慈善事业的发展不仅是社会文明进步的重要标志，也是中华民族传统美德的体现。习近平总书记强调了“守望相助、扶危济困”是中华民族的传统美德，并鼓励支持志愿服务和慈善事业的健康发展。党的十八大以来，中国在以习近平同志为核心的党中央的坚强领导下，制定了慈善法，推动了慈善组织的有序发展，慈善事业取得了长足的进步。 慈善事业的发展不仅体现在政府的政策支持和慈善组织的运作上，也体现在企业的参与中。企业作为社会的重要组成部分，其慈善行为不仅能够为国家和社会解决问题，促进社会和谐，还能够提高企业的社会知名度和公信度。在商业利益的基础上，企业的慈善投入能够使其在经济发展的同时获得更好的社会效益。 例如，武汉伟鹏控股有限公司在2021年度的慈善捐款达到了6561万元，获得了“全国慈善会系统爱心企业”的表彰。伟鹏集团在近五年的时间里累计捐款捐物达到1.7亿元。这样的慈善行为不仅体现了企业的社会责任，也是社会文明进…	发展慈善事业是社会文明进步的重要标志，这体现了一个国家的文化和道德水准。在中国传统文化中，“仁爱”、“乐施”、“济困扶危”等概念一直被强调和传承，这也体现了中华民族的传统美德。通过慈善事业的发展，可以促进社会的公平与正义，实现社会共同富裕和和谐发展。同时，慈善事业也有助于提高全社会的文明素质和道德水准，推动社会向更加文明进步的方向发展。 举例来说，武汉伟鹏控股有限公司的慈善行为体现了企业社会责任的担当，为全国慈善会系统爱心企业，为社会作出了积极的贡献。这种行为不仅有利于帮助社会中的弱势群体，也为其他企业树立了榜样，推动了整个社会的慈善事业发展，体现了社会文明的进步。 总的来说，发展慈善事业不仅有助于改善社会的公共福利和社会治理水平，也是提升社会文明程度的重要标志。	b	a	b	b	stud_a	b
习近平总书记强调：“守望相助、扶危济困是中华民族的传统美德”“支持志愿服务、慈善事业健康发展”。党的十八大以来，在以习近平同志为核心的党中央坚强领导下，我国制定实施慈善法,推动慈善组织有序发展,慈善事业取得长足进步,慈善力量在打赢脱贫攻坚战、全面建成小康社会、支持民生兜底保障和社会福利事业、助力新冠肺炎疫情防控等方面发挥了积极作用。2022年9月1日,由中华慈善总会组织开展的2021年度全国慈善会系统先进评选结果出炉。武汉伟鹏控股有限公司 2021 年度共捐款 6561 万元，表彰为“全国慈善会系统爱心企业”。伟鹏集团在董事长喻鹏的带领下，近五年累计捐款捐物1.7亿元。企业是慈善事业的重要主体。企业的慈善行为是企业自愿为社会及受益人提供无偿社会救助、援助。企业从社会获得商业利益,企业的慈善投入源于其商业利益,企业参与慈善事业，可以为国家、社会排忧解难，有利于全面建设小康社会，共同富裕，促…	请你为发挥中华传统美德对发展慈善事业的积极作用提出两条合理化建议。	挖掘中华传统美德中涵养慈善文化，激励慈善活动的资源。为中华传统美德注入新的内涵，适应慈善事业新发展的要求。	一、积极弘扬中华传统美德，倡导助人为乐、乐善好施的精神，激发社会各界参与慈善事业的热情和责任感。 二、注重培养和传承中华传统美德教育，从小培养孩子们的仁爱之心和社会责任感，使其将慈善行为融入日常生活，推动慈善事业持续健康发展。	，可以通过举办演讲比赛的形式来促进学校师生的参与。这样不仅可以增加大家对慈善事业的认识，还能激发大家的参与热情，进一步推动慈善事业的发展。 ②开展中华传统美德对发展慈善事业的积极作用的主题活动：学校可以定期举办相关主题活动，如义卖、公益演出等，让师生亲身参与，感受到中华传统美德对慈善事业的重要性和影响力。这样可以加深大家对慈善事业的认识，培养更多的志愿者，推动慈善事业的持续发展。	a	a	建议一：加强慈善文化教育，弘扬中华传统美德 首先，应在学校教育中加强慈善文化的教育，引导学生从小树立关爱他人、助人为乐的价值观。通过开展慈善教育活动，如志愿服务、公益讲座等，培养学生的社会责任感和公民意识。同时，企业也可以通过内部培训和公益活动，激发员工的社会责任感，鼓励他们参与慈善事业，传承和发扬中华民族的传统美德。 建议二：建立健全慈善激励机制，鼓励企业参与慈善事业 为了鼓励更多企业参与慈善事业，可以建立相应的激励机制。政府可以通过税收优惠、品牌推广、社会认可等方式，激励企业慈善行为。同时，建立一个公正透明的慈善评价体系，对于企业的慈善贡献进行公正评价和表彰，增强企业参与慈善事业的动力。通过这些措施，可以有效地发挥企业在慈善事业中的积极作用，促进社会和谐与共同富裕。	建议一：加强慈善教育，培养社会公民的慈善意识和责任感。通过学校教育、社会宣传等多种途径，普及慈善知识，提高人们对慈善事业的认识和理解，激发人们的爱心和奉献精神。 建议二：建立慈善事业的长效机制，促进慈善活动的可持续发展。通过设立慈善基金、慈善组织等机构，吸引更多社会力量参与慈善事业，确保慈善资金的合理分配和有效利用，推动慈善事业健康发展。 。	a	b	b	a	model_a	b
新发展格局是开放的、相互促进的国内国际双循环。材料一 随着我国广交会、进博会、服贸会等国际经贸平台的搭建，我国进出口数量有了大幅增长。截至2021年底,我国贸易伙伴遍布全球230多个国家和地区,已同145个国家和32个国际组织签署200多份共建“一带一路”合作文件,中欧班列累计开行超过4万列,运输货物品种达5万余种。在国家政策支持下,2021年我国跨境电商综合试验区增加到105个,市场采购贸易试点增加到31个。我国对外贸易呈现出了规模大,发展快、结构优,质量高、伙伴多,合作广的新特点。材料二 许多90后消费者喜欢海淘，并不是热衷于购买国外的商品，而是有些喜欢的东西在国内买不到。2022年的公司员工在生活上更节俭了，供养孩子上学，还要赡养父母，日子总是精打细算才行。直播带货给消费者带来更直观的体验,更方便购物,但流量造假、“大数据杀熟”等负面问题也频出不断，还有待我们打通国内循环的堵点。	结合材料，运用“经济全球化与对外开放”的知识分析我国对外贸易呈现出新特点的原因。（8分）	主动参与经济全球化，实行高水平贸易自由化便利化。加快转变对外经济发展方式，着力培育开放型经济发展新优势。奉行多边贸易体制，同各国共享中国发展机遇。优化营商环境，集聚外贸发展新动能。	我国对外贸易呈现新特点的原因主要有以下几点：首先，经济全球化的趋势使我国的贸易伙伴多样化，同时我国坚持对外开放的国策，促使我国对外贸易呈现出伙伴多特色。其次，我国积极推动一带一路建设，坚持引进来与走出去并重，遵循共商共建共享原则，形成海陆内外联关动中东西双向互通格局，进一步促进了我国对外贸易的发展。此外，我国加快转变对外经济的发展模式，推动经济朝着优化结构、拓展深度、提高效应的方向转化，实行高水平的投资贸易便利化政策，促进国际产能合作，推动我国对外贸易呈现出新特点。	我国对外贸易呈现出新特点的原因有以下几点：首先，我国顺应了经济全球化的发展趋势，与全世界建立了很多国家的贸易关系，并签署了“一带一路”合作文件，从而促进了贸易全球化。其次，我国坚持“引进来”和“走出去”的对外开放策略，通过与贸易国家进行贸易交往、资本投资和技术引进等方式，积极促进了对外贸易的发展。此外，我国立足国内市场，构建国内国际双循环，充分利用两个市场、两种资源，进一步推动了对外贸易的发展。通过以上措施，我国对外贸易呈现出了新的特点。	a	a	结合材料一和材料二，我们可以分析我国对外贸易呈现出新特点的原因如下： 首先，随着我国广交会、进博会、服贸会等国际经贸平台的搭建，我国的进出口数量大幅增长，贸易伙伴遍布全球230多个国家和地区。这表明我国在全球化的背景下，积极参与国际贸易，扩大了国际市场，增强了国际竞争力。国家政策的支持，如跨境电商综合试验区的增加和市场采购贸易试点的扩展，也为我国对外贸易的发展提供了便利条件。 其次，随着“一带一路”合作的深入发展，我国与145个国家和32个国际组织签署了200多份合作文件，中欧班列累计开行超过4万列，运输货物品种达5万余种。这不仅增强了我国与其他国家的经济联系，也促进了我国产品的国际化和多元化。 再次，90后消费者喜欢海淘的现象，主要是因为他们喜欢的商品在国内买不到，这反映了我国国内市场的多样性和丰富性不足，消费者对国际商品的需求仍然存在。同时，随着生活成本的上升，公司员工在生活上更加节…	我国对外贸易呈现出规模大、发展快、结构优、质量高、伙伴多、合作广的新特点的原因主要包括以下几点： 1. 国家政策支持：我国政府通过广交会、进博会、服贸会等国际经贸平台的搭建，以及签署“一带一路”合作文件等举措，为对外贸易提供了政策支持和推动力，促进了贸易伙伴的增多和合作广度的扩大。 2. 电子商务和市场采购贸易试点的发展：我国跨境电商综合试验区和市场采购贸易试点的增加，为对外贸易提供了新的发展机遇，促进了贸易规模的扩大和质量的提升。 3. 消费者需求的变化：许多90后消费者喜欢海淘，并且有些喜欢的东西在国内买不到，这也促进了我国对外贸易的发展。同时，直播带货给消费者带来更直观的购物体验，也促进了对外贸易的增长。 4. 经济全球化和对外开放政策的推动：随着经济全球化的深入和我国对外开放政策的不断推进，我国对外贸易的规模和广度得到了进一步拓展，伙伴关系也更加多元化。 综上所述，我国对外贸易呈…	b	a	a	b	stud_a	a
新发展格局是开放的、相互促进的国内国际双循环。材料一 随着我国广交会、进博会、服贸会等国际经贸平台的搭建，我国进出口数量有了大幅增长。截至2021年底,我国贸易伙伴遍布全球230多个国家和地区,已同145个国家和32个国际组织签署200多份共建“一带一路”合作文件,中欧班列累计开行超过4万列,运输货物品种达5万余种。在国家政策支持下,2021年我国跨境电商综合试验区增加到105个,市场采购贸易试点增加到31个。我国对外贸易呈现出了规模大,发展快、结构优,质量高、伙伴多,合作广的新特点。材料二 许多90后消费者喜欢海淘，并不是热衷于购买国外的商品，而是有些喜欢的东西在国内买不到。2022年的公司员工在生活上更节俭了，供养孩子上学，还要赡养父母，日子总是精打细算才行。直播带货给消费者带来更直观的体验,更方便购物,但流量造假、“大数据杀熟”等负面问题也频出不断，还有待我们打通国内循环的堵点。	针对案例中的堵点,运用经济生活的知识,从国家角度为畅通国内大循环提出合理化建议。	推动供给侧结构性改革，引导企业扩大产品的有效供给。完善个人收入分配，提高居民收入，健全多层次社会保障体系。加强市场监管，规范市场秩序。	加强市场秩序管理，优化营商环境，应对流量造假和“大数据”杀熟等负面问题，提高市场竞争公平性。同时，加强供给侧结构性改革，优化产业结构，提高国内产品的多样性和质量，以满足消费者多元化需求。要贯彻落实新发展理念，重视消费对经济的反作用力，推动实体经济发展，构建现代化经济体系，促进国内经济高质量发展，优化产品供给结构。	国家应该完善相关法律法规，营造良好的市场环境，坚决整治市场乱象，发挥政府作用，打通国内大循环。同时，国家还应坚持完善和发展按劳分配为主体，多种分配方式并存的分配制度，提升居民可支配收入，增强消费信心。此外，国家还应推动供给侧结构性改革，发展生产力，调节生产来带动消费，使消费者能够购买到自己心仪的产品。最后，国家应贯彻落实创新驱动发展战略，鼓励创新发展，从而推动国内大循环的畅通。	b	b	针对案例中提到的堵点，国家可以采取以下措施来促进国内大循环的畅通： 1. 加强消费者需求预测与分析：通过大数据分析和消费者调查，政府可以更好地了解消费者需求，尤其是对于那些在国内市场难以获取的商品。这样可以帮助企业更准确地预测市场需求，从而提高生产效率和供应链的灵活性。 2. 支持跨区域物流发展：政府可以提供税收优惠、补贴等激励措施，鼓励物流企业发展跨区域服务，降低物流成本，提高物流效率。同时，投资于物流基础设施，如高速公路、铁路、港口等，进一步提升物流能力。 3. 推动电子商务发展：加大对电子商务平台的支持，包括跨境电商综合试验区和市场采购贸易试点的扩展和完善。通过政策扶持，降低企业的电子商务运营成本，提高消费者的购物体验。 4. 加强消费者权益保护：针对直播带货中的流量造假、“大数据杀熟”等问题，政府可以出台相关法律法规，严格监管电商平台，保护消费者权益，增强消费者信心。 5. 培养…	针对案例中的堵点，我认为可以从以下几个方面提出合理化建议： 1. 加强监管力度：针对流量造假、大数据杀熟等问题，国家可以加大对电商平台和直播带货行业的监管力度，建立更加严格的监管制度和惩罚机制，确保市场秩序良好。 2. 提升消费者权益保护：加强消费者权益保护，建立健全的消费者维权机制，对于消费者遇到的负面问题能够及时有效解决，增强消费者信心，促进消费升级。 3. 优化跨境电商政策：进一步优化跨境电商政策，推动跨境贸易便利化，降低进口关税和物流成本，提升跨境电商的便利性和实惠性，吸引更多消费者参与。 4. 加强国内市场建设：加大对国内市场的投入和建设，提升国内商品和服务的质量和种类，满足消费者多样化的需求，减少消费者海淘的需求。 通过以上建议，可以更好地畅通国内大循环，促进国内外经济的良性互动和可持续发展。 。	b	b	b	b	stud_a	a
统一战线是党的总路线总政策的重要组成部分,2022年是我们党明确提出统一战线政策 100周年。百年来，统一战线在我国革命、建设、改革不同历史时期发挥了重要作用。民主党派工作、党外知识分子工作、非公有制经济人士工作，民族工作、宗教工作，港澳工作、对台工作、侨务工作,都是统战工作的重要组成部分。2022年7月25日,中共中央在中南海召开党外人士座谈会，就当前经济形势和下半年经济工作听取各民主党派中央、全国工商联负责人和无党派人士代表的意见和建议。在认真听取大家发言后,习近平发表了重要讲话。他表示,2022年上半年,面对复杂严峻的国际形势和艰巨繁重的国内改革发展稳定任务,我们有效统筹疫情防控和经济社会发展工作,有效应对各种风险挑战,保持了经济社会发展大局总体稳定。在这期间，各民主党派中央、全国工商联和无党派人士积极支持疫情防控工作,聚焦扎实推动共同富裕、统筹推进碳达峰碳中和等重大课题深入调研,…	结合材料，运用政治生活知识，分析中国共产党在国家治理过程中应如何发挥好统一战线的优势。	我国是中国共产党执政的社会主义国家，中国共产党在国家和社会治理中必须充分发挥统一战线的重要法宝作用，实行多层次、多渠道的民主协商。中国共产党是我国最高政治领导力量，必须加强党对统战工作的全面领导，确保统战工作的思想统一，坚决拥护党的路线、方针、政策，把党的主张转化为社会各界的共识和行动。中国共产党坚持科学执政、民主执政，把握做好统战工作的规律，调动一切积极因素，广泛凝聚共识，增强决策的民主性、科学性。	中国共产党在国家治理过程中应充分发挥统一战线的优势，首先要坚持党的执政地位，确保党总领全局、协调各方，引领人民不断夺取新胜利。其次，要坚持多党合作和政治协商制度，团结一切可团结的力量，共同建设社会主义。同时，要构建平等团结的民族关系，各民族团结友好，平等互助，共同面对风险挑战，为祖国繁荣贡献力量。最重要的是要以人民为中心，全心全意为人民服务，立党为公、执政为民，科学决策，实现共同富裕的目标。通过这些措施，中国共产党将能更好地发挥统一战线的优势，推动国家治理体系和治理能力现代化，实现中华民族伟大复兴的中国梦。	中国共产党在国家治理过程中应当充分发挥统一战线的优势。首先，作为中国特色社会主义事业的领导核心，中国共产党应当加强政治领导，思想领导，统筹全局，协调各方，确保国家治理工作顺利进行。其次，中国共产党应当坚持协商民主，听取民主党派的意见，实行民主集中制，发挥我国多党合作特色政党制度的优势。最后，中国共产党应当推动国家治理体系和治理能力现代化，坚持科学执政、民主执政、依法执政，践行为人民服务的宗旨。通过这些措施，中国共产党能够更好地发挥统一战线的优势，推动国家治理工作不断向前发展。	b	b	中国共产党在国家治理过程中发挥好统一战线的优势，首先需要坚持和完善党的统一战线工作制度，确保党的总路线总政策得到各民主党派、各人民团体的支持和配合。其次，要加强与党外人士的交流合作，通过座谈会、研讨会等形式，听取他们的意见和建议，形成共识，促进政策的科学性和有效性。 在具体工作中，中国共产党应充分发挥统一战线在推动共同富裕、实现社会主义现代化等方面的作用。例如，在共同富裕的推进中，党外人士和非公有制经济人士可以通过深入调研、建言献策，帮助政府科学决策，有效施策。同时，统一战线还应在推动国家治理体系和治理能力现代化中发挥重要作用，通过加强民族团结、宗教团结，维护国家的长治久安。 此外，中国共产党在国家治理过程中还应注重统一战线的国际作用，通过港澳工作、对台工作、侨务工作等，维护国家的统一和主权安全，推动构建人类命运共同体。在全球化背景下，统一战线的国际合作和交流对于促进国家治理的国际化、多…	中国共产党在国家治理过程中应充分发挥统一战线的优势，可以通过以下几个方面来实现： 首先，要加强与各民主党派、工商联、无党派人士等统一战线成员的沟通和协商，充分听取各方意见和建议，形成广泛的共识。这样可以更好地凝聚全社会的智慧和力量，为国家治理提供更多有益的参考。 其次，要充分发挥统一战线成员在各自领域的专长和优势，实现优势互补、合作共赢。比如民主党派在人才储备和社会资源方面具有一定优势，可以为政府提供更多的专业建议；工商联代表了私营经济人士的利益，可以帮助政府更好地了解市场状况和民营企业需求。 此外，要加强统一战线成员的教育和引导，增强他们的政治意识和责任意识。只有让统一战线成员深刻理解党的总路线总政策，才能更好地与党中央保持一致，共同为实现国家治理目标而努力。 总的来说，中国共产党在国家治理过程中应充分发挥统一战线的优势，通过加强沟通协商、优势互补、教育引导等方式，实现各方合作共赢，共…	a	a	a	a	stud_a	a
2022年5月6日，为宣传褒扬钱海军先进事迹和崇高精神，中共中央宣传部决定，授予钱海军同志“时代楷模”称号。钱海军,中共党员,现为国网浙江慈溪市供电公司客服中心社区经理、钱海军志愿服务中心理事长。他牢记宗旨、爱岗敬业,从事电力服务工作30年,从一名普通的电力工人成长为有口皆碑的“万能电工”;他学用结合、善于创新,总结提出“五解服务法”,为社区提供用电咨询、业务代办、纠纷调解等多种便民服务，开发志愿服务中心云平台，创新推动志愿服务标准建设;他助人为乐,甘于奉献,累计结对帮助100多位空巢,孤寡老人,帮扶学生27名,服务用户1.3万余人次,以实际行动书写了新时代的雷锋故事;他带头示范,灯暖万家,注册成立宁波,慈溪两级志愿服务中心,发起“千户万灯”活动,足迹遍布浙,藏、吉、黔、川五省(区),让光明的灯火照亮和温暖更多家庭。他曾获得全国劳动模范、全国最美志愿者、浙江省优秀共产党员等荣誉,团队被中…	运用人生价值的知识,说明上述材料所蕴含的哲学道理。	钱海军奉献社会并得到国家的高度认可，说明人生价值是社会价值和自我价值的有机统一。钱海军善于创新，从一名普通工人成长为“万能电工”，说明实现人生价值要提高个人综合素质。钱海军牢记宗旨、甘于奉献，说明实现人生价值要坚持以人民为中心的发展理念、以正确的价值观为指引。	人的价值在劳动与奉献中实现，钱海军通过自己的先进事迹和崇高精神展现了自身的价值。实现人生的价值需要融入实践，作为一名中共党员和供电公司客服中心社区经理，社会为他提供了实现自身价值的平台。要实现人生的价值，必须立足于群众，钱海军以助人为乐、生于奉献的精神给13万余人次提供帮助，用实际行动书写了雷锋式的故事。在不断磨砺自我、努力奋斗的过程中走向成功，他学习并应用知识，为社区提供电务办理服务，带头示范志愿活动，为人民作出了贡献，成为了社会的楷模。	积极投身为人民服务的实践是实现人生价值的一条重要途径。钱海军同志做到了真正为人民服务。价值判断和选择是因人而异的。钱海军同志的正确判断和主观价值观念相吻合。实现人生的目标需要遵循社会提供的客观条件。钱海军同志乐于助人，为社会提供了良好的环境。价值观对人的行为起着导向作用。正确的价值观念对人的全面发展具有重要的引导作用，钱海军同志的行为对他人起到了积极的促进作用。	a	a	运用人生价值的知识来分析上述材料所蕴含的哲学道理，我们可以从以下几个方面进行探讨： 1. **实现个人价值与社会价值的统一**：钱海军的生活和工作充分体现了个人价值与社会价值的统一。他不仅在电力服务工作中实现了个人职业价值，还通过志愿服务和创新活动，实现了对社会的贡献。这种对个人价值和社会价值的双重追求，体现了哲学中的“个人与社会”的和谐统一。 2. **爱岗敬业与奉献精神**：钱海军的30年电力服务工作和他对志愿服务的热情投入，展现了他对工作的热爱和对社会的责任感。这种爱岗敬业的精神和对他人的慷慨帮助，体现了哲学中的“责任与义务”的概念。 3. **创新与实践**：钱海军通过提出“五解服务法”和开发志愿服务中心云平台，展现了他在实践中不断创新和改进的精神。这种结合理论与实践的方法，体现了哲学中的“理论与实践相结合”的原则。 4. **助人为乐与社会和谐**：钱海军的助人为乐精神和他为社…	钱海军同志的事迹展示了对人生的深刻理解和积极实践，体现了人生的真谛在于奉献和助人为乐。他通过自己的努力和奉献，不仅提升了自身的职业技能，更是用实际行动影响和改变了周围的人和社会。他所展现的爱岗敬业、助人为乐、创新服务等行为，体现了中华传统文化中的“仁爱”、“勤劳”、“奉献”的核心价值观。钱海军同志的事迹启示人们要珍惜机会，不负使命，用自己的实际行动为社会贡献力量，实现人生的真正价值。	a	b	tie	a	model_a	a
2022年5月6日，为宣传褒扬钱海军先进事迹和崇高精神，中共中央宣传部决定，授予钱海军同志“时代楷模”称号。钱海军,中共党员,现为国网浙江慈溪市供电公司客服中心社区经理、钱海军志愿服务中心理事长。他牢记宗旨、爱岗敬业,从事电力服务工作30年,从一名普通的电力工人成长为有口皆碑的“万能电工”;他学用结合、善于创新,总结提出“五解服务法”,为社区提供用电咨询、业务代办、纠纷调解等多种便民服务，开发志愿服务中心云平台，创新推动志愿服务标准建设;他助人为乐,甘于奉献,累计结对帮助100多位空巢,孤寡老人,帮扶学生27名,服务用户1.3万余人次,以实际行动书写了新时代的雷锋故事;他带头示范,灯暖万家,注册成立宁波,慈溪两级志愿服务中心,发起“千户万灯”活动,足迹遍布浙,藏、吉、黔、川五省(区),让光明的灯火照亮和温暖更多家庭。他曾获得全国劳动模范、全国最美志愿者、浙江省优秀共产党员等荣誉,团队被中…	结合材料,运用发展中国特色社会主义文化的知识,说明弘扬钱海军勤奋好学、乐于奉献的精神的重要意义。	勤奋好学、乐于奉献的精神是发展中国特色社会主义文化的宝贵资源。弘扬钱海军勤奋好学、乐于奉献的精神有利于发展先进文化，建设文化强国，彰显文化自信，践行社会主义核心价值观，加强公民思想道德建设，培养担当民族复兴大任的时代新人。	弘扬钱海军勤奋好学、乐于奉献的精神具有重要意义。首先，这有利于推动中华优秀传统文化的创造性转化和创新性发展。其次，弘扬这种精神有利于传承和弘扬社会主义核心价值观，弘扬社会主义的“主旋律”。同时，这也有助于培养能够担当民族复兴大任的时代新人。最后，弘扬钱海军的精神有利于加强思想道德建设，深入实施居民思想道德工程。通过弘扬这种精神，我们可以在建设社会主义文化强国的道路上更加坚定地前行。	弘扬钱海军勤奋好学、乐于奉献的精神具有重要意义。首先，这有利于培养担当民族复兴大任的新人，并提供良好的思想条件。弘扬乐于奉献的精神能够为培养时代新人注入活力。其次，这有利于将社会主义核心价值观作为凝魂聚气强基国本的基础工程。培养时代新人的乐于奉献的精神有利于社会主义核心价值观的实现。此外，弘扬钱海军精神对建设社会主义文化强国具有重要意义，为国家强大注入不竭的动力。这样的精神传承发展，有助于推动社会主义文化的发展壮大。	a	a	弘扬钱海军勤奋好学、乐于奉献的精神，对于发展中国特色社会主义文化具有重要的意义。首先，勤奋好学是中华民族的传统美德，也是社会主义建设的重要精神支柱。钱海军从一名普通的电力工人成长为有口皆碑的“万能电工”，这说明通过不懈的学习和实践，可以不断提升个人能力，为社会做出更大的贡献。其次，乐于奉献的精神体现了共产党员的先锋模范作用。钱海军通过志愿服务，帮助了许多需要帮助的人，这不仅提升了社会的和谐度，也激励了更多人投身社会服务，共同推动社会的进步。 在发展中国特色社会主义文化的背景下，弘扬钱海军的精神，可以增强全社会的创新精神和实践能力。创新精神是推动社会进步的动力，而实践能力则是将理论转化为实际行动的关键。钱海军通过创新服务模式，如提出“五解服务法”，为社区提供便民服务，展现了在实践中不断创新和改进的精神。这种精神对于推动社会主义现代化建设具有重要的启示意义。 此外，钱海军的奉献精神也体现了社…	弘扬钱海军勤奋好学、乐于奉献的精神对于社会主义文化建设具有重要意义。首先，钱海军以实际行动践行了社会主义核心价值观，展现了共产党员的先锋模范形象，激励着更多人积极投身于志愿服务和社会公益活动中。其次，钱海军所展现出的奉献精神和助人为乐的品质，有助于传承和弘扬中华民族的传统美德，促进社会和谐稳定。再者，钱海军在服务中心中创新推动志愿服务标准建设，为发展中国特色社会主义文化提供了有益探索和实践经验，推动社会主义文化建设不断向纵深发展。总的来说，弘扬钱海军的精神，有助于凝聚社会正能量，促进社会主义核心价值观在全社会的传播和弘扬。 。	a	tie	a	a	tie	a
2022年5月6日，为宣传褒扬钱海军先进事迹和崇高精神，中共中央宣传部决定，授予钱海军同志“时代楷模”称号。钱海军,中共党员,现为国网浙江慈溪市供电公司客服中心社区经理、钱海军志愿服务中心理事长。他牢记宗旨、爱岗敬业,从事电力服务工作30年,从一名普通的电力工人成长为有口皆碑的“万能电工”;他学用结合、善于创新,总结提出“五解服务法”,为社区提供用电咨询、业务代办、纠纷调解等多种便民服务，开发志愿服务中心云平台，创新推动志愿服务标准建设;他助人为乐,甘于奉献,累计结对帮助100多位空巢,孤寡老人,帮扶学生27名,服务用户1.3万余人次,以实际行动书写了新时代的雷锋故事;他带头示范,灯暖万家,注册成立宁波,慈溪两级志愿服务中心,发起“千户万灯”活动,足迹遍布浙,藏、吉、黔、川五省(区),让光明的灯火照亮和温暖更多家庭。他曾获得全国劳动模范、全国最美志愿者、浙江省优秀共产党员等荣誉,团队被中…	某校计划开展向钱海军学习的活动，请为该活动拟定两条宣传标语。	坚定理想信念，奋斗报效国家，提高综合素质，肩负历史重任。	学习“钱海军”精神，实现新时代愿景 以“钱海军”精神之态，筑新时代辉煌之基	向钱海军学习，传承楷模精神，铸就优质品格！ 学习钱海军，熠熠生辉，蒸蒸日上，努力成为时代楷模！	tie	a	1. "跟随钱海军，点亮服务之光，共创温暖人心的未来。" 2. "钱海军精神，引领时代楷模，共同书写新时代的奉献篇章。	1. 学习钱海军，传承雷锋精神，奉献社区、关爱他人。 2. 践行“五解服务法”，用实际行动点亮社区，传播志愿服务的温暖和力量。 。	tie	tie	tie	a	stud_a	a
注:2022年上半年,民营企业进出口增长13.6%,占进出口总额的比重为49.6%,比上年同期提高1.9个百分点。②2022年年上半年，机电产品进出口增长4.2%，占进出口总额的比重为49.1%。服务出口增幅大于进口5.7个百分点,带动服务贸易逆差下降34.3%至791.9亿元。知识密集型服务进出口12144.9亿元,增长9.8%;出口增长较快的领域是电信计算机和信息服务,其他商业服务,分别增长16.3%,13.9%。	请你概括材料一中2022年上半年我国进出口的特点。	2022年上半年，我国进出口贸易保持增长，贸易顺差呈扩大趋势，民营企业、机电产品进出口保持较快增长，知识密集型服务进出口继续平稳增长，东盟、欧盟、美国等世界主要经济体是中国的最大贸易伙伴。	2022年上半年，我国出口额大于进口额，且出口额持续增长。国家发挥了宏观调控的作用，稳定宏观经济大盘，促进外贸进出口稳步增长。	2022年上半年，我国进出口规模同比增速呈上升趋势，但增速较慢。其中出口额上升，而进口额有所降低。与前十大贸易伙伴中，我国与东南亚联盟贸易额最高，但同比增速整体呈下降趋势。在进出口额增长迅速的背景下，我国积极践行一带一路经济发展理念。	b	a	2022年上半年，我国进出口呈现出以下几个特点： 1. 民营企业的活跃：民营企业的进出口增长了13.6%，占比提高到49.6%，比上年同期增加了1.9个百分点。这表明民营企业在国际贸易中扮演着越来越重要的角色，具有较强的市场竞争力和国际化能力。 2. 机电产品的稳定增长：机电产品的进出口增长了4.2%，占比为49.1%。虽然增长速度不如民营企业那么快，但机电产品仍然是我国出口的重要组成部分，显示了我国在制造业方面的稳定优势。 3. 服务贸易的逆差减少：服务出口增幅大于进口5.7个百分点，导致服务贸易逆差下降34.3%至791.9亿元。这说明我国服务出口的增长速度快于进口，服务贸易的结构优化和出口质量提升。 4. 知识密集型服务的快速增长：知识密集型服务的进出口总额增长了9.8%，达到了12144.9亿元。其中，电信计算机和信息服务的出口增长率达到16.3%，其他商业服务增长率为13.9%…	根据材料一中的数据，2022年上半年我国进出口的特点主要包括民营企业进出口增长较快，占比提高；机电产品进出口占比较大；服务出口增幅大于进口；知识密集型服务进出口增长较快。整体来看，我国进出口呈现出稳步增长、结构优化的趋势。 .	a	b	b	tie	stud_a	a
材料二 下一步，随着国内经济持续修复，东部沿海地区进出口将继续回暖，中西部地区继续延续高速增长态势,RCEP协议生效,大市场、低关税将促进我国优势产品出口增长。海关将坚持以习近平新时代中国特色社会主义思想为指导,高效统筹疫情防控和经济社会发展，坚决落实全国稳住经济大盘电视电话会议各项部署，聚焦“守国门、促发展”，强化监管优化服务，着力促进外贸保稳提质，以实际行动迎接党的二十大胜利召开。	结合材料,运用经济生活知识,分析我国下一步应如何着力促进外贸保稳提质,以实际行动迎接党的二十大胜利召开。(10分)	坚持中国共产党的领导，贯彻新发展理念，增强自主创新能力，优化产业结构，提升开放型经济发展水平，助推经济转型升级，加快形成经济发展新格局，提供优质供给。坚持开放发展理念，顺应经济全球化的趋势，深度参与全球化进程，深度参与国际竞争，加快转变对外经济发展方式，优化对外贸易结构，促进对外贸易转型升级，推进贸易强国建设。鼓励、支持和引导非公有制经济积极参与国际竞争、激发市场主体活力，鼓励企业形成以技术、品牌、质量、服务为核心的出口竞争新优势、积极参与“一带一路”建设，拓展对外贸易。充分发挥市场竞争机制的作用，将有效市场与有为政府相结合，建设全国统一大市场、创造良好的营商环境，提升贸易和投资自由化便利化政策，放宽市场准入，营造公平开放竞争有序的市场秩序。	为了促进外贸保稳提质，我国应该着力推动供给侧结构性改革，大力发展生产力，推动产业结构的优化升级。随着国内经济的恢复，东部沿海地区的进出口将持续回暖，而中部地区将延续新的发展态势。同时，我国还应该发展更高层次的开放型经济，构建国内国际双循环格局，重点出口低关税优势产品，以提升外贸质量。另外，规范市场秩序、优化营商环境也是十分重要的，这样可以给经济发展提供更好的保障。最重要的是贯彻创新驱动发展战略，促进经济的高质量发展，强化监管优化服务，从而着力提升外贸质量。通过以上措施，我们就可以在党的二十大胜利召开之际，迎接新的发展机遇。	为了促进外贸保稳提质，我国下一步应该加强对外开放水平，发展更高层次的开放型经济，构建国内国际政循环格局，发挥市场优势。同时，需要规范市场秩序，完善各项法规，营造良好的营商环境，聚焦于国门，促发展，强化监管优化服务，以实际行动迎接党的二十大。此外，还要发挥国家宏观调控作用，促进我国优势产品出口增长，高效统筹疫情防控和经济社会发展，稳往经济大局。另外，构建现代化发展体系，立足于实体经济发展，促进来部沿海地区进出口继续回暖，推动国内经济持续恢复。	a	a	为了着力促进外贸保稳提质，以下是中国可以采取的一些措施： 1. 加强市场调研和产品定位：通过市场调研，了解国际市场的需求变化和竞争格局，优化产品结构和品种布局，提高产品的国际竞争力。 2. 优化出口结构：鼓励高附加值产品的出口，如高科技产品、绿色环保产品等，减少对低附加值产品的依赖，提升出口的综合竞争力。 3. 加强品牌建设：通过品牌建设，提高产品的知名度和市场份额，建立品牌影响力，增强产品的国际市场吸引力。 4. 提升服务质量：改善出口服务，包括物流、贸易金融、市场信息服务等，提高服务的专业性和效率，提升客户满意度。 5. 加强国际合作：利用RCEP协议等多边贸易协议，拓宽市场，降低关税，促进贸易便利化，增强国际合作，共同推动区域经济一体化。 6. 加强监管和风险防控：通过加强监管，防范和减轻外部风险，如贸易摩擦、汇率波动等，确保外贸稳健运行。 7. 培养专业人才：加强对外贸人才的培养…	根据材料中提到的情况，我国下一步应该着力促进外贸保稳提质的措施可以包括以下几个方面： 首先，要继续优化海关监管服务，加强对外贸企业的支持和指导，降低外贸企业的运营成本和时间成本，提高外贸效率。通过简化手续、加快通关速度等措施，促进外贸贸易的便利化和高效化。 其次，要积极推动RCEP协议的实施，充分利用大市场和低关税的优势，加强与相关国家和地区的贸易合作，拓展外贸市场，提升产品竞争力。同时，要加强对RCEP协议规则的熟悉和理解，确保我国企业能够最大程度地受益。 此外，要继续加大对中西部地区的支持和投入，促进这些地区的外贸出口增长。通过加强基础设施建设、技术创新支持等措施，帮助中西部地区企业提升产品质量和市场竞争力。 最后，要密切关注国际市场的变化和动向，及时调整外贸政策和策略，灵活应对外部环境的变化，确保外贸稳定增长。同时，要加强与各国的经贸合作，推动多边贸易体制的发展，为我国外贸发展提供…	a	b	b	a	model_a	a
习近平总书记深刻指出：“人民代表大会制度之所以具有强大生命力和显著优越性，关键在于它深深植根于人民之中。”代表们发挥来自人民、植根人民的特点和优势，听取和反映群众的愿望心声,代表人民参加行使国家权力,在人大会议上讨论决定国家和地方的大事。我们要毫不动摇地坚持、与时俱进完善人民代表大会制度，始终紧跟党中央决策部署，做到党和国家工作重心在哪里,人大工作就跟进到哪里,作用就发挥到哪里。各级人大及其常委会要聚焦党中央重大决策部署,聚焦人民群众所思所盼所愿,要用好宪法赋予人大的各项权力,推动解决制约经济社会发展的突出矛盾和问题。各级“一府一委两院”要严格执行人大及其常委会制定的法律法规和作出的决议决定，依法报告工作，自觉接受人大监督，充分发挥各级部门积极性。人民代表大会的制度优势一定能够转化为治理效能的。	效能。结合材料，运用政治生活知识，说明人民代表大会制度优势为什么能够转化为治理	中国共产党领导是我国最高政治领导力量，中国共产党领导是中国特色社会主义最本质的特征，是中国特色社会主义制度的最大优势，所以在人大工作中紧跟党中央决策部署，坚持党的领导，充分发挥了中国共产党总揽全局、协调各方的作用。人民代表大会制度坚持人民当家作主，坚持以人民为中心，是实现全过程人民民主的重要制度载体，能够调动广大人民群众的积极性、主动性和创造性，实现中华民族伟大复兴中国梦。人民代表大会制度是中国特色社会主义制度重要组成部分，坚持民主集中制原则，保证国家机关协调高效运转，充分发挥各级部门积极性。人民代表大会制度坚持党的领导、人民当家作主和依法治国的统一，聚焦党中央重大决策部署，聚焦人民群众所思所盼所愿，同时用好宪法赋予人大的各项权力，推进了治理体系和治理能力现代化。	我国人民代表大会制度的优势能够转化为治理的力量，主要体现在以下几个方面。首先，人民代表大会制度是我国人民民主专政的重要体现，确保人民当家作主，代表人民行使国家权力。这有利于坚持党的领导、以人民为中心，全心全意为人民服务，保持与党中央一致，凝聚人民群众的意愿和诉求。其次，我国的人民代表大会制度是最真实、最广泛、最有效的民主形式，代表们倾听并反映群众心声，有效运用宪法赋予的权力。此外，人民代表大会制度有助于构建阳光型政府，实行以民为本的工作方式，严格执行人大制定的法律法规，充分发挥各级部门的积极性。通过这些优势特点，人民代表大会制度能够转化为治理的有效手段，为实现国家治理现代化不断注入新的活力。	，他们代表着广大人民的利益和意愿，通过选举产生，直接参与国家事务的决策和监督。因此，人民代表大会制度能够转化为治理的优势在于其体现了人民的民主意志和参与度，使政府更加贴近民意，更加有效地解决问题和推动发展。人民代表大会制度的优势在于其民主性和代表性，能够保证国家的长治久安和人民的幸福安康。	a	a	人民代表大会制度优势能够转化为治理效能，主要体现在以下几个方面： 首先，人民代表大会制度确保了代表的合法性和代表性。根据习近平总书记的指示，代表们是来自人民、植根人民的，这意味着他们能够真实反映人民的意愿和需求。这种制度设计确保了代表大会的决策能够得到广泛的社会支持和认同，从而提高了决策的合理性和有效性。 其次，人民代表大会制度通过定期的选举和监督机制，确保了权力的透明和 Accountability。代表们在人大会议上讨论决定国家和地方的大事，并且要依法报告工作，自觉接受人大监督。这种制度安排有助于防止权力滥用，提高政府工作的透明度和效率。 再次，人民代表大会制度强调了党中央的领导地位和决策部署的统一性。各级人大及其常委会要聚焦党中央重大决策部署，这意味着政府工作的方向和重点能够得到统一和集中，避免了方向不明确和资源分散的弊端，从而提高了治理的效能。 最后，人民代表大会制度通过宪法赋予…	效能是指在特定目标下所取得的成果与投入之间的比率，是一种衡量工作绩效的指标。人民代表大会制度的优势之一在于其深深植根于人民之中，代表们通过听取和反映群众的愿望心声，能够更好地代表人民参与国家权力的行使。通过这种方式，人民代表大会能够确保国家决策更加贴近民生，更具针对性。在实践中，代表们可以通过人大会议讨论决定国家和地方的大事，推动解决制约经济社会发展的突出矛盾和问题，进而提高治理效能。 举例来说，当人民代表大会代表在会议上就某一重要议题展开充分讨论并做出决策时，他们所代表的是人民的利益和意愿，因此这些决策更容易得到广泛的支持和认可，有利于提高政策的执行效能。此外，人大及其常委会对各级“一府一委两院”严格监督的力度也能够促使各级部门更加自觉地履行职责，提高工作效率，确保政策的有效实施。 因此，人民代表大会制度优势能够转化为治理效能，主要体现在代表们充分代表人民利益、贴近民生，以及对各级部门…	a	a	a	a	model_a	a
铸魂培根在近代中国最危急的时刻,马克思主义传入中国,给中国的先进分子带来了先进思想。中国共产党人用马克思主义真理的力量激活了中华民族历经几千年创造的伟大文明,用“马克思主义之矢””“射中国革命之的””,用实践观点赋予了传统文化中“知行合一”的新内涵……找到了决定中国前途和命运的方向和道路。一百年来,中国共产党人在接续奋斗中,点燃了伟大征途上一个个熠熠生辉的精神火矩，激活了中国人民的“家国天下”情怀，唤醒了中华民族最深厚的文化基因，并使之成为团结海内外中华儿女的最大同心圆。古老的中华文明重新迸发出强大活力。	用马克思主义真理的力量激活了中华民族历经几千年创造的伟大文明。结合材料,运用文化传承与文化创新知识，谈谈你对这句话的理解。（10分)	在革命、建设、改革的伟大实践中，中国共产党坚持以马克思主义为指导，对中华优秀传统文化的内涵和表达形式进行创造性转化和创新性发展。形成了以伟大建党精神为源头的精神谱系，丰富和发展了以爱国主义为核心的中华民族精神。创造了革命文化和社会主义先进文化，形成了中国特色社会主义文化，为人民提供精神指引、坚定文化自信。	马克思主义真理的力量激活了中华民族历经几千年创造的伟大文明，这句话深刻阐述了马克思主义在中国文化传承与文化创新中的作用。在近代中国最危急的时刻，马克思主义传入中国，为中华民族带来了先进的思想，为文化发展注入了动力。中国共产党人以马克思主义真理为指导，积极发扬中华民族的优秀传统文化，同时不断进行文化创新，使得中华文明焕发出新的活力。在文化发展的过程中，要继承传统，推陈出新，面向世界，博采众长，尊重文化多样性，不断丰富和发展本民族文化。通过接继奋斗，点燃精神火炬，激活“家国天下”情怀，使得古老的中华文明在当代社会中焕发出强大的生命力。近代文化的发展是一个继承与创新的过程，马克思主义真理的力量为中华民族文明的传承和发展提供了重要动力和指导。	马克思主义的传入，让中国重新激活了古老的中华文明，这一强大的动力源泉来自于对中国传统文化的继承与创新。中华民族历经几千年所创造的伟大文明，是有着美好未来的坚定信念。通过马克思主义的先进思想，中国共产党人以我为主、为我所用，激发了中华民族几千年来积淀的文明力量，为中华民族的繁荣发展注入了新的活力。	a	a	这句话强调了马克思主义在中国的传入和应用对中华民族伟大文明的激活作用。马克思主义作为一种科学的世界观和方法论，提供了一套分析社会现象和推动社会发展的理论框架。中国共产党人将马克思主义与中国的实际情况相结合，运用其真理力量，激活了中华民族几千年来积累的文化遗产和传统智慧。 在文化传承方面，马克思主义帮助中国共产党人认识到中华文明的独特性和普遍价值，强调了文化的历史连续性和民族自豪感。通过对传统文化的深入理解和尊重，中国共产党人能够更好地继承和发扬中华民族的优秀传统，如“知行合一”的思想，这一理念强调理论与实践的统一，鼓励人们将思想和行动相结合，实现个人与社会的和谐发展。 在文化创新方面，马克思主义提供了一种批判性思维的工具，鼓励人们对现存的文化和社会制度进行批判和改造。中国共产党人利用这一工具，结合中国的实际情况，推动了文化的创新和发展。例如，通过实践观点的应用，中国共产党人赋予了“知行合…	通过马克思主义真理的力量激活中华民族历经几千年创造的伟大文明，意味着中国共产党人在传承中华文明的基础上，注入了新的理念和思想，使得这个传统文明焕发出新的活力和能量。马克思主义的实践观点赋予了传统文化中“知行合一”的新内涵，让中华民族的文明得以在当代社会中持续发展。同时，马克思主义的强调社会公平和正义也与中华传统文化中的仁义道德相契合，为中华民族的文明传统注入了新的活力和动力。 举例来说，中国共产党在推动社会主义现代化建设的过程中，结合马克思主义真理，不仅弘扬了中华传统文化中的家国情怀和天下情怀，更注重实现社会公平和人民幸福。这种融合传统文化与现代文明的做法，使得中华文明能够在当今世界中继续发光发热，展现出其独特的魅力与力量。 综上所述，通过马克思主义真理的力量激活中华民族的文明，不仅是在传承中华文明的基础上赋予其新的内涵，更是在融合传统与现代、传承与创新的过程中，使得中华文明能够与时俱进…	b	a	b	b	stud_a	tie
守正创新“致广大而尽精微”出自中国古代经典《中庸》,讲的是顺应大本达道、尽心勉力笃行方能化育成事。““致广大而尽精微,是成事之道。”2021年12月8日,在中央经济工作会议上,习近平强调了工作的方法论:“干事业做工作大方向要正确,重点要明确,战略要得当,同时要把控好细节，把政治经济、宏观微观、战略战术有机结合起来，做到谋划时统揽大局、操作中细致精当”。在 2022 年新年贺词中，习近平再次为我们未来干事创业指明了方法路径，要求我们“致广大而尽精微”。	结合材料,运用整体和部分的知识,分析说明“致广大而尽精微”这句古语对新时代青年干事创业的启示。(10分)	整体居于主导地位，整体统率着部分，要树立全局意识，实现整体的最优目标。干事创业要“致广大”，有远大的目标规划，做到谋划时统揽大局、明确重点，战略得当。部分影响整体，要重视部分的作用，用局部的发展推动整体的发展。要“尽精微”，把远大的目标规划落实落细，积微成著；要统筹兼顾“致广大”和“尽精微”，把远大的目标和脚踏实地的工作作风结合起来。	“致广大而尽精微”这句古语告诉我们，整体和部分是密不可分的，部分的变化会影响整体，关键部分的变化更是至关重要的。要想取得成功，必须全面考虑，同时注重细节，把握大局和细节，做到谋划时顾全大局，操作时精益求精。只有这样，才能在干事创业的道路上取得成功。因此，我们要重视局部的作用，用局部的发展来推动整体的发展，这样才能指明我们未来创业的方法。总之，致广大而尽精微是成事之道，是我们在新时代青年干事创业中应该牢记的重要启示。	“致广大而尽精微”，这句古语告诉我们，在新时代，青年干事创业要注重整体和部分的关系。整体决定部分，青年要明确目标，做好工作大方向，抓住重点，明确重点，树立正确战略，为自身前进提供方向。同时，也要关注部分，把控细节，直视细节，因为细节决定成败。在这个过程中，关键部分的功能甚至会对整体起决定作用。青年要注重部分要素的整体性有序性结构数据化倾向，推动青年干事创业的进步。部分和整体要统筹兼顾，发展顺应时代，共同进步。这句古语为新时代青年干事创业提供了重要启示，只有将整体和部分结合起来，才能取得更大的成功。	a	b	"致广大而尽精微"这句古语源自《中庸》，强调的是在追求广泛性和普遍性的同时，要注重细节和精髓的把握。这对于新时代的青年干事创业来说，具有深远的启示意义。 首先，"致广大"意味着要有远见和宏观的视角，注重整体的发展和大局的把握。在创业的过程中，青年人应该有一个清晰的愿景和目标，理解自己所在行业和社会的整体环境，确保自己的创业项目能够与时俱进，符合社会发展的趋势。 其次，"尽精微"则强调了细节和精确的重要性。无论是产品设计、服务流程还是团队管理，都需要注重细节的把握，确保每一个环节都能达到最佳状态。在创业的过程中，青年人应该具备细致入微的工作态度，注重每一个细节的优化，以提高整体的工作效率和质量。 结合材料中习近平总书记的讲话，我们可以看到这两点在当代的实践中得到了体现。习近平强调了工作的方法论，要求我们既要把握大方向，又要注重细节的把控。这正是"致广大而尽精微"的实践要求。 总之，对于新时…	"致广大而尽精微"这句古语对新时代青年干事创业的启示是，青年在干事创业的过程中要注重整体和部分的结合，既要把握大方向和重点，又要关注细节和操作方法。在实践中，青年干事创业者要明确自己的目标和战略，同时要关注具体的执行细节，做到宏观和微观的有机结合。只有把握好整体和部分的关系，才能真正做到全面、精准地开展工作，取得成功。 举例来说，一个创业者在创业过程中需要设定明确的目标和发展战略，同时要关注市场细分、产品设计、营销策略等细节工作。只有将整体和部分紧密结合起来，才能在竞争激烈的市场中立于不败之地，实现事业的成功。 总之，“致广大而尽精微”这句古语提醒青年干事创业者要注重全局和细节，只有在整体和部分的协同作用下，才能在新时代的激烈竞争中取得更大的成就。 。	a	b	a	a	model_a	a
继往开来2021 年 7月1日，习近平代表党和人民庄严宣告——“在中华大地上全面建成了小康社会”。回望过往的奋斗路,我们以全面建成小康社会的世纪伟业,把光荣与梦想写在了历史深处;眺望前方的奋进路……。	运用所学知识，以“继往开来的世纪伟业”为主题撰写一篇短评。(6分)	对中国人来说，全面建成小康社会，既是国家发展巨变的雄壮交响，也是人民笑颜绽放的鲜活故事。它书写在消除绝对贫困的人间奇迹里，书写在世界上规模最大的社会保障体系中，书写在不断增多的蓝天、不断延伸的绿道、不断改善的居住环境里，书写在让人民生活“一年更比一年好”的不变追求里。回望过往的奋斗路，我们以全面建成小康社会的世纪伟业，把光荣与梦想写在了历史深处；眺望前方的奋进路，我们还要全面建成社会主义现代化强国，继续在人类的伟大时间历史中创造中华民族的伟大复兴。	“继往开来的世纪伟业”是指在前人的基础上，继续发展创新，实现更加辉煌的成就。要实现这一伟业，首先需要深刻理解前人的经验和教训，吸取其中的精华，避免重蹈覆辙。其次，需要不断开拓创新，不断寻求突破，不断进步。只有在不断探索和实践中，才能真正实现“继往开来的世纪伟业”。在这个过程中，需要坚持不懈地努力，保持谦虚和谨慎的态度，不断学习和提高自己的综合素质，不断提升自己的领导能力和团队合作精神。只有这样，才能真正实现“继往开来的世纪伟业”。	“继往开来的世纪伟业”是我们党提出的宏伟目标，需要我们坚持党的领导来完成下一个百年目标。回望过去的世纪伟业，我们看到了党领导人民在各个领域取得的巨大成就，也汲取了许多宝贵经验教训。眺望前方的奋进路，我们需要继续发扬党的优良传统，不断开拓创新，为实现新时代中国特色社会主义事业的更大发展贡献力量。在新的征程上，我们要牢记初心使命，勇于担当，努力奋斗，为推动国家繁荣稳定、人民幸福安康而努力奋斗。愿我们在“继往开来的世纪伟业”中书写新的辉煌篇章！	b	b	继往开来：中华大地上的小康社会 在2021年7月1日，中国共产党的领导人习近平庄严宣告，中华大地上全面建成了小康社会。这一成就是中国共产党成立以来的又一伟大历史转折点，也是中国人民长期奋斗的结果。小康社会的实现，不仅是对过去奋斗成果的继承，也是对未来发展的开创。 小康社会的概念源于中国古代的社会理想，指的是一个社会在物质文化、政治法律、社会精神等方面都比较充实、比较和谐的社会状态。在现代社会，中国政府将小康社会的目标定位为实现人民生活水平的显著提高，消除贫困，保障基本民生，促进社会公平正义，增强国家综合国力。 全面建成小康社会的过程中，中国政府采取了一系列措施，如实施了“一国两制”、“九五”和“十一五”规划，推动了经济发展、科技进步、文化繁荣和社会稳定。这些措施不仅促进了经济的快速增长，也有效地缩小了城乡、区域发展差距，提高了人民生活水平。 然而，实现小康社会并非一蹴而就，它需要长期的努…	"继往开来的世纪伟业"是中国人民长期奋斗的结果，是中国特色社会主义伟大实践的光辉成果。全面建成小康社会不仅使亿万人民过上了幸福美好的生活，也展示了中国特色社会主义制度的优越性。这一世纪伟业的实现离不开中国共产党的正确领导和中国人民的共同奋斗，凝聚了亿万人民的智慧和力量。在继续前行的道路上，我们要继续坚定中国特色社会主义道路自信、理论自信、制度自信、文化自信，不断推进新时代中国特色社会主义伟大事业，实现中华民族伟大复兴的中国梦。 "	b	a	a	b	stud_a	a
材料二 钢铁工业是国民经济的重要基础产业，是我国实现工业化、加快城镇化进程的重要支撑。2022年2月10日,工信部等八部委联合印发《关于加快推动工业资源综合利用实施方案的通知》,提出通过实施再生资源高效循环利用工程,提升再生资源利用价值。加强大数据、区块链等互联网技术在再生资源领域的应用,助力构建线上线下相结合的高效再生资源回收体系。着力延伸再生资源精深加工产业链条,促进铁、铜、铝、锌、镍、钴、锂等战略性金属废碎料的高效再生利用，提高再生资源高值化利用水平。有序推进高端智能装备再制造。	结合材料二并运用经济生活知识，说明我国是如何促进钢铁工业高质量发展的。	实施科学的宏观调控，坚持绿色发展理念，实施再生资源高效循环利用工程，提升再生资源利用价值，推动钢铁工业可持续发展。深化供给侧结构性改革，推动互联网、大数据、人工智能同实体经济深度融合，助力构建线上线下相结合的高效再生资源回收体系。建设创新引领、协同发展的产业体系，延伸再生资源精深加工产业链条，有序推进高端智能装备再制造。	我国通过印发关于促进工业发展的通知，提出实施再生资源循环利用工程，提升再生资源利用价值，从而促进钢铁工业高质量发展。同时，加强互联网技术在再生资源领域的应用，助力构建高效再生资源回收体系，为钢铁重工业发展提供保障。此外，深加工产业链，提高再生资源高值化利用水平，提高钢铁资源利用率，进一步推动钢铁工业的高质量发展。同时，加大科技投入，更新设备，促进钢铁工业转型升级，实现钢铁工业朝着高质量方向持续发展。	为了促进钢铁工业的高质量发展，我国采取了多项措施。首先，工信部出台了实施再生资源高效循环利用工程的方案通知，以提高再生资源的利用价值，实现资源的高效充分利用。其次，着力延伸再生资源精深加工产业链条，增加产品的附加值，促进金属废料的高效再生利用，提高资源利用水平。另外，我国还通过创新推动生产力，有序推进高端智能装备再制造，以提升钢铁工业的技术水平和竞争力。这些举措有助于推动我国钢铁工业向高质量发展的方向迈进。	a	a	结合材料二，中国在促进钢铁工业高质量发展方面采取了一系列措施。首先，通过实施再生资源高效循环利用工程，提升再生资源的利用价值，旨在减少资源浪费，提高资源利用效率。例如，通过大数据和区块链技术的应用，实现了再生资源的追溯和管理，使得资源循环利用更加高效和透明。 其次，加强大数据、区块链等互联网技术在再生资源领域的应用，助力构建线上线下相结合的高效再生资源回收体系。这种体系能够提高资源回收的效率和质量，同时也促进了相关产业链的发展。 再者，中国政府还着力延伸再生资源精深加工产业链条，促进战略性金属废碎料的高效再生利用。例如，通过提高铁、铜、铝、锌、镍、钴、锂等金属的再生利用率，减少对原材料的依赖，降低生产成本，提高产品质量。 最后，中国有序推进高端智能装备再制造，这不仅能够延长产品的使用寿命，还能够减少废弃物的产生，实现资源的最大化利用。此外，这也能够促进相关技术和产业的发展，提升钢铁工业的…	根据材料二提到的工信部等八部委联合印发的通知，我国促进钢铁工业高质量发展的方式主要体现在以下几个方面： 首先，通过实施再生资源高效循环利用工程，提升再生资源利用价值。这意味着我国将加大对再生资源的利用力度，减少资源浪费，提高资源利用效率，从而促进钢铁工业的可持续发展。 其次，加强大数据、区块链等互联网技术在再生资源领域的应用，构建线上线下相结合的高效再生资源回收体系。这将有助于提升再生资源回收的效率和精准度，进一步提高再生资源的利用价值，推动钢铁工业向高质量发展。 此外，着力延伸再生资源精深加工产业链条，促进战略性金属废碎料的高效再生利用，提高再生资源高值化利用水平。这将有助于提高钢铁工业的产品质量和降低生产成本，从而推动钢铁工业朝着高端、高效、高质量发展。 最后，有序推进高端智能装备再制造，进一步提升钢铁工业的生产技术水平和装备水平，推动工业智能化、自动化发展，从而促进钢铁工业的高质量…	tie	a	a	tie	stud_a	a
为了决胜脱负攻坚，贵州省来县推进羊肚菌种植合作杜，共种植羊肚菌350亩。群众通过土地流转、劳务就业等方式积极参与羊肚菌产业发展，在产业带动下,村民的“钱袋子”渐渐鼓起来。为调动村民的生产积极性，该县不断完善相关分配政策，促进生产效率提高；试行财政收入增长与扶贫资金增长的“并行挂钩”机制,确保财政收入的增量切实惠及贫困群众;采取“公司+合作社+农户”的合作模式,实现农民增收与公司效益提高“共赢”;坚持开发扶贫与救济扶贫“双轮驱动”,对丧失劳动能力的贫困人口，织牢社会保障网;社会帮扶持续加力，企业、民众等主体通过捐款捐物等爱心帮扶措施，帮助建档立卡贫困户脱离贫困。	结合材料,运用我国的个人收入分配的相关知识,分析该县加何决胜脱贫攻坚的	大力发展生产，通过产业扶贫，让村民的“钱袋子”鼓起来，不断完善体现效率、促进公平的收入分配政策，实现财政收入与居民收入“同增”，农民增收与公司效益提高“共赢”，健全社会保障、转移支付等为主要手段的再分配调节机制，坚持开发扶贫与救济扶贫相结合，织牢社会保障网，缩小收入差距，推动共同富裕，重视发挥第三次分配作用，发挥社会公益事业的力量，助力建档立卡贫困户脱离贫困。	通过按生产要素分配，带动群众脱贫，群众通过土地流转、劳动就业等方式积极推动羊肚菌产业发展，在产业带动下，村民的收入逐渐增加。同时，不断完善相关政策，切实保障村民的合法利益，促进生产效率提高，带动产业发展。试行财政收入增长与扶贫金增长的“并行挂钩”机制，确保财政收入的增量切实惠及贫困人口，让人民群众更好地根据要求做好工作，提高人民脱贫的信心。同时，织牢社会保障网，实施爱心帮扶措施，切实保障村民的生活需求，增强村民的幸福感，为决胜脱贫攻坚起到积极作用。采取“公司+合作社+农户”的合作模式，实现农民增收与公司效益提高共赢，为脱贫攻坚工作做出积极贡献。	为了决胜脱贫攻坚，该县可以采取以下措施：首先，提高劳动分配在初次分配中的比重，以此来调动村民的生产积极性；其次，政府应出台完善的分配制度，确保财政收入实惠贫困群众；同时，可以采取新的合作模式，实现农民增收与公司效益共赢；最后，政府应完善相应的社会保障体系，为贫困人口提供社会保障。通过这些举措，可以有效促进个人收入分配的公平性，从而帮助该县实现脱贫目标。	a	a	结合材料，贵州省来县在决胜脱贫攻坚的过程中，采取了一系列措施来推进羊肚菌种植合作，并通过土地流转、劳务就业等方式，积极调动村民参与羊肚菌产业发展。这些措施体现了我国个人收入分配的相关知识，尤其是市场化和多元化的收入分配方式。 首先，通过土地流转和劳务就业，村民可以根据市场需求和自身能力选择参与羊肚菌种植的方式，这种选择性参与体现了市场化的收入分配原则。村民可以通过租赁土地或提供劳动力来参与产业，实现了资源的有效配置和劳动力的合理分配。 其次，来县通过完善相关分配政策，促进生产效率提高，体现了政府在收入分配中的作用。政府通过政策支持，提高了生产效率，增强了产业的竞争力，从而提高了村民的收入。 再次，试行财政收入增长与扶贫资金增长的“并行挂钩”机制，确保财政收入的增量惠及贫困群众，这种做法体现了政府在保障基本生活和促进社会公平的收入分配责任。通过这种机制，贫困群众能够从财政收入的增长中获得直…	结合材料，该县通过推进羊肚菌种植合作计划，采取了多种措施促进贫困地区的发展。在个人收入分配方面，该县实行了并行挂钩机制，将财政收入的增长与扶贫资金的增长挂钩，确保财政收入的增量惠及贫困群众。此举有利于提高贫困群众的收入水平，缩小贫富差距。同时，该县采取了公司+合作社+农户的合作模式，实现农民增收与公司效益提高的共赢局面，进一步促进了贫困地区的经济发展。此外，坚持开发扶贫与救济扶贫双轮驱动，织牢社会保障网，确保贫困人口的基本生活需求。最后，社会帮扶持续加力，通过企业、民众等主体的爱心帮扶措施，帮助建档立卡贫困户脱贫。这些措施有助于提高贫困地区居民的收入水平，促进整个地区的经济发展，从而实现脱贫攻坚的目标。	a	b	a	b	stud_a	b
材料- 数字治理是提高城市治理现代化水平的重要路径，一座“会思考”的城市能让百姓生活更美好。早在2016年,杭州市利用“互联网+”和大数据技术组建全国首个“城市大脑”,全面推进数字政府建设,城市综合管理和服务水平不断捉升。率先将全市所有交通信号灯、车辆停泊体系接入“城市大脑”，全市交通通行顺畅度大大提升;随后,杭州从交通“治堵”拓展到各类惠民利民领域,将就医体系接入“城市大脑”,通过网上预约、缴费、取单等“云操作”，杭州各大医院“挂号难、看病慢”等问题得到明显缓解；在“战疫情、促发展”中，杭州依托“城市大脑”率先开发和应用“杭州健康码”等数字平台,实现了精准高效数据收集,为有关部门科学预判和积极响应提供了有力支撑;研发“亲清在线”政商服务平台,实现政企在线活动全留痕、可追溯，让公权力行使过程变得更为透明。	结合材料一,运用为人民服务的政府的有关知识,分析杭州市“城市大脑”建设对推动城市治理现代化的启示。	创新城市管理方式，推动政府职能转变，提高城市公共管理和服务的水平。运用数字治理为人民群众办好事、办实事，践行为人民服务的宗旨和对人民负责的基本原则。借助“城市大脑”，完善信息与智力支持系统，提高决策的科学化水平。借助“亲清在线”加强对政府权力运行的制约与监督，让权力在阳光下运行。	杭州市“城市大脑”建设是一个很好的例子，展示了数字技术在城市治理现代化中的重要作用。推进数字政府的建设，可以提高政府的管理和服务水平。通过数字化手段，政府可以更高效地处理各种事务，提升行政效率。同时，数字化政府建设也有利于提高政府行政的公开度和透明度，使政企活动更容易被追溯。这种方式符合以人民为中心的理念，方便民众办事。因此，杭州市“城市大脑”建设为推动城市治理现代化提供了有益启示。	杭州市“城市大脑”建设的启示在于，政府应当始终以人民为中心，满足人民的需求，推动城市治理现代化。在建设过程中，政府应当积极运用现代科技手段，提高治理效率，解决实际问题，让公权力行使过程更加透明，建设人民满意的政府。特别是在应对突发疫情时，政府可以借助数字平台实现精准数据收集，提供科学预判，为城市治理现代化提供有力支持。因此，政府应当不断创新，与时俱进，不断探索适合当代城市发展的治理模式，为人民谋福祉，推动城市治理现代化。	b	b	杭州市“城市大脑”建设是中国数字治理的典范案例，通过集成“互联网+”和大数据技术，杭州市成功构建了一个高效、智能的城市管理系统，极大地推动了城市治理现代化。以下是杭州市“城市大脑”建设的一些启示： 1. **智能化管理提升效率**：杭州市通过将交通信号灯和车辆停泊体系接入“城市大脑”，实现了智能化管理，有效提升了城市交通的通行顺畅度。这种模式可以应用到其他城市服务领域，如智能垃圾分类、智能监控等，提高服务效率，减少人工成本。 2. **全方位服务提升民生**：杭州市将就医体系接入“城市大脑”，实现了线上预约、缴费、取单等服务，缓解了“挂号难、看病慢”等问题。这种模式可以推广到教育、住房、公共服务等领域，提供更加便捷的服务，提升民众的生活质量。 3. **数据驱动决策**：在疫情防控期间，杭州市利用“城市大脑”开发了“杭州健康码”等数字平台，实现了精准高效的数据收集，为政府决策提供了科学依…	杭州市“城市大脑”建设通过整合各类数据和信息，实现了交通、医疗、疫情防控等领域的智能化管理和服务优化，从而提高了城市治理的现代化水平。这为其他城市提供了一个很好的启示，即数字治理是推动城市治理现代化的重要路径之一。通过利用互联网+和大数据技术，城市可以实现数据共享、智能决策、高效服务等，从而让城市更加智能、便捷、高效，让百姓生活更美好。此外，杭州市建设“城市大脑”还体现了政府为人民服务的宗旨，通过数字化手段提升了政府服务水平，让百姓享受到更好的服务。因此，其他城市可以借鉴杭州市的做法，加强数字化建设，提升政府服务水平，推动城市治理现代化。。	a	b	b	a	model_a	b
材料二 湿地保护是生态文明建设的重要内容,十九大以来,习近平总书记多次对湿地保护作出重要指示，党中央把湿地保护和修复纳入生态文明建设的战略部署。根据习近平总书记重要指示和党中央决策部署，2021年10月，全国人大常委会启动湿地保护法草案修订工作。草案审议和修订过程中,先后3次在全社会公开征求意见,收到了来自各个部门和人民群众意见和建议多达上千条。2021年12月,全国人民代表大会常务委员会通过《中华人民共和国湿地保护法》。2022年2月，全国人大常务委员会启动执法检查工作，检查组在全国积极开展调研,多次视察湿地保护、修复和利用工作。来自国家林草局2022年第一季度新闻发布会的数据显示,国家湿地公园有效保护了240万公顷湿地,带动区域经济增长500多亿元，约 90%的国家湿地公园向公众免费开放，成为人民群众共享的绿色空间和“绿水青山就是金山银山”理念的生动实践。目前，我国湿地保护率已经达到…	结合材料二，运用我国的人民代表大会制度的有关知识，分析全国人大常委会是如何依国法推动湿地保护的 (10分)	坚持党的领导，积极推进党的决策部署通过法定程序上升为国家意志。坚持民主集中制原则，广泛征集民众关于湿地保护的意见和建议，做到立法为民。行使立法权，坚持科学民主立法，完善湿地保护的相关法律，为湿地保护提供法律保障。行使监督权，开展执法调研和检查，促进法律实施，捍卫法律尊严。	全国人大常委会通过中华人民共和国湿地保护法，行使立法权，推动湿地保护工作的开展。在立法过程中，全国人大常委会还开展了积极的调研和视察工作，行使监督权，确保湿地保护法的实施。此外，全国人大常委会还向全社会公开征求意见，体现了政务公开原则，保障了立法工作的民主性和透明度。最终，全国人大常委会行使决定权，决定通过湿地保护法，为湿地保护事业提供了法律保障和支持。	全国人大常委会依据我国的人民代表大会制度，通过启动检查工作、修订湿地保护法草案等方式，积极推动湿地保护工作。检查组织在全国进行出差调研，多次视察湿地保护、修复和利用工作，以依法治理的方式有效推动湿地保护。全国人大常委会还响应号召，贯彻“绿水青山就是金山银山”理念，通过生动实践来带动人们对湿地保护的理解，进一步推进湿地保护工作。	a	a	结合材料二，我们可以看到全国人大常委会在习近平总书记的重要指示和党中央的决策部署下，积极推动湿地保护工作。首先，全国人大常委会启动了湿地保护法草案修订工作，这表明了人大常委会在生态文明建设中的积极参与和主动作为。其次，草案审议和修订过程中，人大常委会在全社会公开征求意见，收集了大量的意见和建议，这体现了人大常委会在法制建设中注重公众参与和意见采纳的民主精神。 在草案通过后，全国人大常委会又启动了执法检查工作，检查组在全国范围内开展了调研和视察，这进一步确保了湿地保护法的有效执行。同时，国家林草局发布的数据显示，国家湿地公园的保护和修复工作取得了显著成效，这也反映了人大常委会在推动湿地保护工作中的成效。 总之，全国人大常委会通过启动法草案修订、公开征求意见、监督执法检查等方式，依法推动了湿地保护工作，体现了人民代表大会制度在生态文明建设中的重要作用。	全国人大常委会是我国人民代表大会制度的最高机构，在湿地保护方面起着重要的推动作用。首先，全国人大常委会依据习近平总书记的重要指示和党中央的战略部署，启动了湿地保护法草案的修订工作，并通过了《中华人民共和国湿地保护法》，从而为湿地保护提供了更加明确的法律保障。其次，全国人大常委会通过了执法检查工作，积极开展调研和视察工作，确保湿地保护、修复和利用工作得到有效执行。此外，全国人大常委会还通过国家林草局发布的数据，对湿地保护工作进行了定期检查和评估，推动了湿地保护工作的持续发展和进步。总的来说，全国人大常委会通过制定法律、开展执法检查等方式，依国法推动湿地保护工作，为我国湿地保护事业的顺利进行提供了有力支持。	a	b	b	a	model_a	b
2021年9月8日,我国农业农村部等6部门联合印发《“十四五”全国农业绿色发展规国划》（以下简称《规划》》，这是我国首部农业绿色发展专项规划。近年来农业农村部会同有关部门，将绿色发展作为实施乡村振兴战略的重要引领，创新工作思路,强化工作举措,转变农业发展方式,农业绿色发展进展明显。但从总体上看,农业绿色发展仍处于起步阶段,需要加大工作力度,推进农业发展全面绿色转型。呈《规划》聚焦绿色发展关键领域和薄弱环节,提出加强农业资源保护利用、加强农业面源污染防治、加强农业生态保护修复、打造绿色低碳农业产业链等重点任务。同时,提出强化科技动能和制度动能。一方面,健全绿色技术创新体系,强化农业绿色发展科技动能;另一方面,健全体制机制,增强农业绿色发展制度动能。规划同时提出,到2035年,农业绿色发展取得显著成效,农村生态环境根本好转,绿色生产生活方式广泛形成,农业生产与资源环境承载力基本匹配,生产生活…	结合材料，运用经济生活的知识，谈谈我国出台农业绿色发展规划的原因。	我认为我国出台农业绿色发展规划是国家通过科学的宏观调控推进农业发展全面绿色转型的必要举措。我国出台农业绿色发展规划，紧抓绿色发展关键领域和薄弱环节，有利于促进农业资源保护和农业发展的统一，促进农业发展方式转变，完善农业绿色产品产业链和供应链。有利于强化科技和制度改革，健全绿色技术创新体系，健全体制机制，增强农业绿色发展新动能，提升我国农业整体竞争力。有利于深入贯彻习近平主席的生态文明思想，促进社会主义新农村建设。	我国出台农业绿色发展规划的原因主要有以下几点。首先，这有利于推动乡村振兴战略的实施，促进经济高质量发展，推进社会主义新乡村基本建成。其次，贯彻落实绿色发展理念，推进农业发展全面绿色转型，有利于建成生产生活生态相协调的农业发展格局。第三，加强农业生态保护和修复，打造绿色低碳农业产业链，形成绿色环保的健康产业，促进农业发展。最后，健全绿色技术创新体系，落实驱动创新发展理念，强化农业绿色发展科技动能，促进农业发展。	我国出台农业绿色发展规划的原因在于要注重生态文明建设，坚持人与自然和谐共处的原则，这样才能打造出一个良好的美好生活环境。我国贯彻“绿水青山就是金山银山”的绿色发展理念，加强生态保护，才能更好地发展农业，促进经济发展。	a	a	我国出台《“十四五”全国农业绿色发展规划》的原因是多方面的，主要体现在以下几个方面： 1. **环境保护和生态修复**：随着经济的快速发展，农业生产活动对环境的影响日益显著，特别是农业面源污染、资源过度开发等问题已经成为制约农业可持续发展的重要因素。出台绿色发展规划是为了加强农业资源保护利用，防治农业面源污染，保护和修复农业生态系统，实现农业生产与环境保护的和谐共生。 2. **应对气候变化**：全球气候变化对农业生产提出了新的挑战，绿色低碳农业产业链的建设有助于减少农业对温室气体排放，提高农业的气候变化适应能力和抵御能力。 3. **推动农业现代化**：绿色发展是农业现代化的重要途径。通过推动农业绿色转型，可以提高农业生产效率，增强农业产业链的竞争力，促进农业结构的优化升级。 4. **实现乡村振兴战略**：农业绿色发展是乡村振兴战略的重要组成部分。通过推进农业绿色发展，可以促进农村经…	我国出台农业绿色发展规划的原因主要包括以下几点： 1. 环境问题日益凸显：随着工业化和城市化进程的加快，农业生产对环境的影响越来越大，包括土壤污染、水资源浪费、生态破坏等问题。为了解决这些环境问题，必须推动农业向绿色、可持续发展方向转变。 2. 农业可持续发展需求：传统农业发展方式存在许多弊端，包括过度使用化肥农药、土地沙化、生态系统破坏等。绿色发展规划的出台旨在促进农业可持续发展，保障农业生产的长期健康发展。 3. 农产品质量安全保障：随着人们对食品质量安全的关注增加，绿色农产品的需求也在逐渐增长。通过推动农业绿色发展，可以提高农产品质量，增强人们对食品的信任。 4. 推动乡村振兴战略：农业是乡村振兴的重要支撑，绿色农业不仅可以改善农民生产生活环境，还可以提升农民的收入水平，推动农村经济发展。 总的来说，我国出台农业绿色发展规划的原因是为了解决环境问题、推动农业可持续发展、保障农产品质…	tie	a	a	tie	stud_a	a
某地创新村民自治机制,探索出“四五三”治村模式,真正实现了依制管人、依法治村。健全以村党组织会议、村民委员会、村民(代表)会议、村务监督委员会“四会管村”的组织架构。村党组织会议重点对土地征用、救贫救济、产业发展、基础设施建设等涉及全体村民切身利益的重点、热点、难点问题把关定向,村民(代表)会议行使决策权,村民委员会行使执行权，村务监督委员会行使监督权。在落实“一事一议”制度基础上，建立“五步议事”民主决策制度。村级重大事项经党组织走访调研提议、“两委”商议论证、党员大会合议会诊、上级部门审议把关、村民(代表)会议拍板后才能实施。在进一步强化责任、落实工作的同时，不断拓宽民主监督新渠道，完善干部履职监督、“三务(党务、村务、财务)公开”监督、村级账务监督的“三项监督”新体系,进一步激发了民主自治活力,保证人民当家作主。	结合材料，运用政治生活知识，说明“四五三”治村模式是如何保证人民当家作主的。	“四五三”治村模式，坚持基层党组织领导，创新基层群众自治方式。坚持全过程民主，依法、依制保障人民群众享有知情权、参与权、监督权等广泛民主权利。通过基层民主协商，广泛集中民智民意，坚持民主决策，推进了决策的科学性、民主性。拓宽民主监督新渠道，坚持人民主体地位，激发了人民群众参与自治的积极性和主动性，保证人民当家作主	通过健全各村的组织架构，规定各村组织的职能，完善各类监督机制，促进决策执行的公开透明化。同时，落实“事一议“制度，建立“五步议事”民主决策手续，确保提议、论证、会诊、把关、拍板等程序完备，进一步强化责任落实和拓宽民主监督渠道，激发了民主自治活力，保证了人民当家作主的权利。同时，创新村民自治机制，推动人民参与积极性，使决策在人民的监督下得以实行，促进了人民当家作主的实现。	“四五三”治村模式通过设立“村党组织会议”“村民委员会”等组织架构，明确各自行使权力，进一步强化了干部责任，落实工作，提高工作效率，保障人民的诉求得到解决。同时，这一模式拓宽了民主监督新渠道，让村民有更便利的方式参与管理，提高了人民的参与管理与提出问题的积极性。通过这些措施，人民当家作主得以有效实现。	b	b	“四五三”治村模式通过建立健全以村党组织会议、村民委员会、村民(代表)会议、村务监督委员会“四会管村”的组织架构，有效地保障了人民当家作主的权利。具体来说： 1. 村党组织会议：作为治村的核心，村党组织会议负责对涉及全体村民切身利益的重点、热点、难点问题进行把关定向。通过党组织的领导和指导，确保村民利益得到充分考虑和保护。 2. 村民(代表)会议：村民(代表)会议是村民的集体组织，行使决策权。通过选举产生的村民代表，代表村民的意愿和利益，参与到村级决策中，确保决策过程中的公平和透明。 3. 村民委员会：村民委员会是村民自治的组织实体，行使执行权。村民委员会负责执行村民会议的决策，管理村务，保障村民的切身利益得到实现。 4. 村务监督委员会：村务监督委员会行使监督权，确保村务的规范和有序进行。通过监督，防止村务管理中的不正之风和腐败现象，维护村民的合法权益。 此外，“四五三”治村模式还建立…	根据材料内容，可以看出“四五三”治村模式通过建立以村党组织会议、村民委员会、村民(代表)会议、村务监督委员会为核心的组织架构，实现了权力的分散和监督。具体来说，村党组织会议对涉及全体村民利益的重点问题进行把关，村民(代表)会议行使决策权，村民委员会行使执行权，村务监督委员会行使监督权。此外，通过“五步议事”民主决策制度，重大事项经过走访、商议、合议、审议和拍板等环节，确保了村级重大事项的民主决策和监督。同时，强化责任、拓宽民主监督渠道，完善监督体系，进一步激发了民主自治活力，保证了人民当家作主的权利得到落实和保障。 通过以上措施，村民在村务管理中具有更大的话语权和决策权，能够更好地参与村庄事务，监督村干部的工作，确保村务公开透明、廉洁高效。因此，“四五三”治村模式在保证人民当家作主方面发挥了重要作用。 。	b	b	b	tie	stud_a	a
含有中医药材的咖啡、从传统年画获取灵感的8K影片《门神》……在2021年服贸会首钢园文旅服务展馆内,与时代碰撞的中国元素熠熠生辉,前来园区内非遗文化体验基地、陶瓷艺术馆的人们络绎不绝。一批“守得住经典，当得了网红”国货走俏的背后，是年轻人对国潮消费品的认可。商务部数据显示,2021年上半年,有关电商平台“618”促销活动期间,国产品牌销售额占比超过70%。越来越多的国货成为网红,“五毒饼”“熬夜水”“大白兔香水”……诸多老字号跨界破传统文化焕发的新活力,也延伸到经济社会发展的方方面面。从嫦娥、玉兔,到鸿蒙、祝融,科技领域从传统文化中汲取素材,中国传统文化与年轻一代以别样方式再次相遇,激发出根植心灵深处的文化密码和精神力量。中国医药、中国科技、中国制造……中国风潮不仅赢得国人的青睐，更在不断创新发展中走出国门，让更多人了解又潮又飒的中国文化	结合材料并运用联系多样性的原理,说明如何增强年轻一代对中国优秀传统文化的坚定自信。	事物联系是多种多样的，要求我们注意分析和把握事物存在和发展的各种条件。我们既要注重直接联系，也要注重间接联系，抓住事物相互联系的中间环节。要充分利用优秀传统文化资源，打造现代文化消费品牌，推动传统文化和现代科技相融合，让年轻一代在消费和感受现代科技的震撼中，了解和认同优秀传统文化，坚定文化自信，我们既要把握事物的内部条件，也要把握事物的外部条件。在国内大力弘扬传统文化的同时，我们也要推动传统文化走向世界，让年轻一代感受中华优秀传统文化的顽强生命力和强大影响力，从而坚定文化自信。	通过结合材料并运用联系多样性的原理，我们可以增强年轻一代对中国优秀传统文化的坚定自信。首先，我们应该让中国元素在科技碰撞接触中得到推广，使中国优秀传统文化在各个领域得以应用。其次，我们要重点发展中国传统文化，让年轻一代对其感到文化自信，同时使用“扬弃”的做法，去除文化的糟粕，保留精华，让传统文化得到推广。此外，我们还要使用系统优化的手段，创新中华文化传播方式，让中国青年对传统文化有坚定的自信。通过以上措施，我们可以增强年轻一代对中国优秀传统文化的认同感和自信心。	加强个人与国家的联系，将中国优秀传统文化发扬光大的理念深入人心，深刻了解、贯彻优秀文化。同时，我们要宣扬文化自信，深入了解中国传统文化，感受传统文学的魅力，增强文化认同感。传统文化应与时代相联系，符合文化主题，焕发更多生机，创新地将传统文化与现代创新相结合，在不断创新中走向世界，让更多人看到、了解到富有活力的中国文化。此外，增加中国优秀传统文化传播渠道，挖掘传统文化的传播力量，让更多人真正了解、感受优秀传统文化，以大众喜闻乐见的方式进行传播。	a	a	增强年轻一代对中国优秀传统文化的坚定自信，可以从以下几个方面入手： 1. **创新与跨界融合**：如咖啡与中医药材的结合，8K影片《门神》从传统年画中汲取灵感，这些创新跨界的尝试能够让年轻一代在现代生活中感受到传统文化的魅力和实用价值。通过将传统文化与现代元素结合，创造出具有时代感和创新性的产品和艺术作品，从而激发年轻一代对传统文化的兴趣和认同感。 2. **数字化传承与推广**：利用电商平台、社交媒体等现代技术手段，数字化传承和推广中国优秀传统文化。例如，通过直播、短视频等形式，展示和讲解传统文化的精髓，增加年轻一代的参与感和了解度。 3. **教育与实践相结合**：在学校教育中增加对中国传统文化的课程内容，同时鼓励学生参与到文化实践活动中，如传统工艺学习、文化节庆参与等。通过实际操作和体验，增强学生对传统文化的理解和认同。 4. **文化与科技的结合**：如嫦娥、玉兔等科技项目中融入…	年轻一代对中国优秀传统文化的坚定自信可以通过多方面来增强。首先，可以通过将传统文化元素融入当代流行文化中，比如在时尚、娱乐、科技等领域中加入传统文化元素，使年轻人更容易接受和喜爱。例如，在电商平台上推出的各种国货产品，通过跨界合作和创新设计，吸引了年轻人的关注和购买欲望，让他们更加了解和喜爱传统文化。 其次，可以通过教育和宣传来增强年轻一代对传统文化的自信。在学校课程中加入传统文化的教育内容，举办各种传统文化活动和展览，让年轻人更深入地了解和体验传统文化，从而增强他们的自信心。同时，通过媒体和网络平台的宣传推广，将传统文化呈现给年轻人，让他们更加了解和认同自己的文化传统。 最后，可以通过激发年轻人的创造力和参与性来增强他们对传统文化的自信。鼓励年轻人参与传统文化的传承和创新，让他们在实践中感受到传统文化的魅力和价值，从而增强他们对传统文化的自信和认同感。同时，也可以通过各种比赛和活动，激…	b	a	b	b	stud_a	a
含有中医药材的咖啡、从传统年画获取灵感的8K影片《门神》……在2021年服贸会首钢园文旅服务展馆内,与时代碰撞的中国元素熠熠生辉,前来园区内非遗文化体验基地、陶瓷艺术馆的人们络绎不绝。一批“守得住经典，当得了网红”国货走俏的背后，是年轻人对国潮消费品的认可。商务部数据显示,2021年上半年,有关电商平台“618”促销活动期间,国产品牌销售额占比超过70%。越来越多的国货成为网红,“五毒饼”“熬夜水”“大白兔香水”……诸多老字号跨界破传统文化焕发的新活力,也延伸到经济社会发展的方方面面。从嫦娥、玉兔,到鸿蒙、祝融,科技领域从传统文化中汲取素材,中国传统文化与年轻一代以别样方式再次相遇,激发出根植心灵深处的文化密码和精神力量。中国医药、中国科技、中国制造……中国风潮不仅赢得国人的青睐，更在不断创新发展中走出国门，让更多人了解又潮又飒的中国文化	只有创新喜闻乐见的形式才能使优秀传统文化焕发新活力。运用文化生活知识对该观点加以评析。(12分)	推动文化形式创新，是文化创新的重要内容。依托现代生活、时尚潮流推动优秀传统文化传承形式创新，使优秀传统文化以人们喜闻乐见、具有广泛参与性方式推广开来，有利于增强优秀传统文化的活力。推动文化创新还要挖掘优秀传统文化内涵，探寻优秀传统文化基因，为经济科技发展提供丰富文化滋养，从而彰显其强大的影响力。推动文化创新还要为优秀传统文化融入新的时代精神，不断丰富和发展优秀传统文化的内涵，从而彰显其顽强的生命力。	该观点不完全正确。创新喜闻乐见的形式只是传播形式上做了改变调整、却没有真正从内涵其本质去做出到新。②要让优秀传统文焕发新活力应该与时代的理念、主题相结合、创新时代融合出符合时代的优秀传统文化、才能焕发出新活力.③也需要每一个人去传承、发杨传统文化、去真正领悟，将认与国家、民族有联系，④中国传统文化是民族的智慧结晶	只有满足消费者需求才能激发消费者的购买欲，从而推动优秀传统文化焕发新活力。推陈出新，革故出新是至关重要的。只有将现代技术与传统文化相结合，才能实现对优秀传统文化的创新，使其焕发出新的生命力。	b	a	创新是推动传统文化焕发新活力的关键。通过将传统文化与现代元素结合，创新的形式能够吸引年轻一代的注意力，并使传统文化在新的语境中焕发活力。例如，咖啡行业的创新者将中医药材融入咖啡中，创造出具有中医药功效的咖啡产品，这种创新不仅保持了传统中医药的精髓，也满足了现代消费者的需求。 在文化创意领域，8K影片《门神》通过年画的传统艺术形式，采用了现代技术手段，创造出一部具有传统文化内涵的高科技影片。这种跨界的创新使得传统文化在现代媒体中得到了新的表现形式和传播途径。 此外，老字号品牌的跨界合作也是创新的一种形式。例如，“五毒饼”和“熬夜水”等老字号通过与时尚、科技等领域的合作，打破了传统的界限，吸引了更多年轻消费者的关注。这种跨界合作不仅为老字号带来了新的生机，也为传统文化注入了新的活力。 总之，创新是使优秀传统文化焕发新活力的重要手段。通过与现代元素的结合，传统文化能够在新的形式中得到传播和发展…	传统文化是一个国家的精神财富，通过创新的方式呈现可以使其焕发新的活力。首先，创新能够吸引更多年轻人参与和关注传统文化，比如通过将传统文化元素融入流行文化中，制作出符合当代审美的产品。例如，将传统年画元素运用到8K影片中，《门神》就是一个很好的例子。其次，创新可以让传统文化更贴近当代生活，让人们更容易接受和理解。比如，将中医药材运用到咖啡中，既保留了传统文化元素，又符合现代人对健康和美味的需求。最后，创新可以使传统文化与现代社会更好地融合，促进文化的传承和发展。通过创新形式，传统文化可以在当今社会中焕发出新的魅力，吸引更多人参与其中，从而实现文化的传承和发展。 。	b	b	b	tie	model_a	b
含有中医药材的咖啡、从传统年画获取灵感的8K影片《门神》……在2021年服贸会首钢园文旅服务展馆内,与时代碰撞的中国元素熠熠生辉,前来园区内非遗文化体验基地、陶瓷艺术馆的人们络绎不绝。一批“守得住经典，当得了网红”国货走俏的背后，是年轻人对国潮消费品的认可。商务部数据显示,2021年上半年,有关电商平台“618”促销活动期间,国产品牌销售额占比超过70%。越来越多的国货成为网红,“五毒饼”“熬夜水”“大白兔香水”……诸多老字号跨界破传统文化焕发的新活力,也延伸到经济社会发展的方方面面。从嫦娥、玉兔,到鸿蒙、祝融,科技领域从传统文化中汲取素材,中国传统文化与年轻一代以别样方式再次相遇,激发出根植心灵深处的文化密码和精神力量。中国医药、中国科技、中国制造……中国风潮不仅赢得国人的青睐，更在不断创新发展中走出国门，让更多人了解又潮又飒的中国文化	请你为2021年服贸会首钢园文旅服务展馆拟写两条宣传标语。	传承弘扬老字号，创新发展老品牌，科技赋能新文旅，创意引领新生活，走进服贸会，再看老品牌。	①融合服贸与首钢，感受新旧交融之美②创新引领发展，传统焕发生机	1. 创新助力中国文化蓬勃发展 2. 培育人们喜爱的文化，共同成长	a	a	1. "时尚碰撞传统，体验中国元素的魅力 — 首钢园文旅服务展馆，2021年服贸会的亮点之选！" 2. "守经典，追网红，探索国货的新风尚 — 首钢园文旅服务展馆，展现中国文化的创新与活力！	1. 传统与现代碰撞，中国元素熠熠生辉！欢迎来到2021年服贸会首钢园文旅服务展馆，感受国潮新魅力！ 2. 跨界创新，传承经典！在这里，发现中国文化的无限可能，体验传统与时尚的完美融合！ .	tie	b	b	b	mode_a	b
某镇全力推行“四建四联”，积极探索乡村治理新模式，收到了较好的效果。一是建组织架构,联治理末端。将党组织延伸到村寨的每个角落,通过设置心愿箱,收集整理群众关心的热点难点问题。二是建“七人议事”,联自然村寨。村寨成立“七人议事”小组,对本村范围内的重点工作、群众合理诉求进行议论,并将议出的结果报村支两委进行决策。三是建数据平台,联千家万户。由镇政府牵头,建立镇村两级数据平台,实行基础数据共享,不断减轻村级负担,达到一劳永逸的效果。四是建激励机制,联村民自治。利用“党建十积分”机制,将环境卫生、乡风文明、遵纪守法、伦理道德、参与社会治理情况等纳入积分管理,每月考核中高分的纳入红榜进行加分奖励,低分的纳入黑榜进行监管整改。	结合材料并运用政治生活知识，说明该镇推行“四建四联”为什么能促进乡村治理。	充分发挥基层党组织在乡村治理中的领导核心作用，发挥基层政府在乡村治理中的指导作用，完善基层群众自治制度，创新基层民主形式，丰富全过程民主实践，有效保障人民当家作主，建立数据平台，降低乡村治理成本，提高乡村治理效率，发挥村民在乡村治理中的主体作用，推动德治、法治、自治相结合，激发村民参与乡村治理的积极性。	推行“四建四联”能促进乡村治理的原因如下：首先，发展党组织的思想引领核心作用延伸到村每个角落，通过设置心愿箱收集整理群众关心的问题，能够引导村民更加关注政治事务，增强党的组织号召力。其次，进行基层群众自治，贯彻国家的基本政治制度，建立七人议事联合自然村寨，报村支两委两套决策系统，有利于增强基层自治能力，促进决策的科学性和民主性。第三，实行智能化的管理，实现信息共享，便利政务处理，反映民意扩展渠道，通过信息技术为基础更好地管理和服务村民，提高治理效率。最后，让村民主动参与社会主义民主建设，建立三党建＋积分制，分别奖励或整改，能够激励村民积极参与村务管理，推动乡村治理的民主化和规范化。	①建立有组织的体系,将党的组织延伸到村赛的每个角落，设置心愿箱，收集整理群众关心的热点难点问题。②建立“七人议事”,针对本村范围内的重心工作,群众合理诉讼求进行议论,并将议出的结果报村支两委进行决策。②建数据平台加强联系,奖行基础数据共享,不断减轻村级负担达到一劳永逸的效果。④建激励机制、联村民自治，将环境卫生、文明、道纪守法，参与社会治理情况等纳入积分管理、进行奖励.	b	b	该镇推行“四建四联”能够促进乡村治理，主要体现在以下几个方面： 首先，通过建立组织架构并将党组织延伸到村寨的每个角落，确保了党的领导和组织的覆盖面。这种做法有助于提高党的组织力，增强党的凝聚力和战斗力，使得党的决策和指示能够迅速传达到基层，有效地引导和推动乡村治理工作。 其次，通过建立“七人议事”小组，村寨居民可以参与到决策过程中，形成了村民参与乡村治理的机制。这种机制有助于提高群众的参与度和满意度，促进了乡村治理的民主化和法制化，确保了决策的合理性和有效性。 再次，建立镇村两级数据平台，实现了基础数据的共享，减轻了村级的负担，提高了乡村治理的效率和透明度。数据平台的运用有助于科学决策，促进了乡村治理的精准化和智能化。 最后，通过建立激励机制，如“党建十积分”机制，有效地激发了村民的积极性和主动性。这种机制通过奖励高分和整改低分，形成了积极向上的治理环境，促进了乡村治理的规范化和长效化。…	该镇推行“四建四联”能促进乡村治理的原因有几个方面。首先，建立组织架构将党组织延伸到村寨的每个角落，可以有效地将党的政策和方针传达到基层，增强基层组织的凝聚力和执行力。其次，建立“七人议事”小组可以让村民参与到村庄事务的讨论和决策中，增强了村民的自治意识和参与感，提高了治理的民主性和透明度。再者，建立数据平台可以提高信息的共享和传递效率，减轻了村级负担，提高了工作效率。最后，建立激励机制可以激励村民积极参与乡村治理，增强了村民的责任感和奉献精神，推动了乡村治理的全面提升。综上所述，该镇推行“四建四联”可以有效地促进乡村治理，提升治理效果和村民满意度。 。	a	b	b	tie	model_a	b
近年来,我国数字政府建设已进入快车道。各级政府业务信息系统建设和应用成效显著,数据共享和开发利用取得积极进展,“最多跑一次”“一网通办”“一网统管”“接诉即办”等创新实践不断涌现。从疫情防控中的人流分析、趋势研判,到城市大脑建设中的智慧交通、应急防汛,大数据、云计算、人工智能等数字技术广泛应用于政务服务、公共服务。2022 年 6月，国务院印发《关于加强数字政府建设的指导意见》，明确提出要大力推行“互联网+监管”,构建全国一体化在线监管平台,推动监管数据和行政执法信息归集共享和有效利用;运用大数据强化经济监测预警,为宏观政策跨周期调节提供数据支撑。	结合材料，运用政治生活知识，说明我国加强数字政府建设的重要意义。	推进政府职能转变，加快构建服务型政府，提升政府治理效能，推进国家治理体系和治理能力现代化，推动政府治理模式创新，优化和提升公共服务能力，为人民群众带来更多获得感，为经济社会发展注入更多新动能。	加强数字政府建设对我国具有重要意义。首先，推动政府业务信息系统的建设可以更好地体现政府的职能，促进政务服务和公共服务的共享，推动智慧交通、应急防御、大数据、云计算、人工智能等数学技术的广泛应用，进而促进社会发展。其次，构建全国一体化在线监管平台，推动“互联网+监管”有效运行，有利于监管数据和行政执法信息的归集共享和有效利用，运用大数据强化监测，为实现政策跨周期调整提供数据支撑。因此，加强数字政府建设对于我国现代化发展具有重要意义。	加强数字政府建设在我国具有重要意义。首先，数字政府的建设可以促进社会经济发展，推动各企业的发展。其次，数字技术在政务服务和公共服务中的广泛应用，例如智慧交通、应急防汛、大数据、大计算、人工智能等，将提高政府管理效率，为市民提供更便捷的服务。建立合理的数字体系，创新发展，将增强政府的决策能力，发挥政府管理机制的作用。构建全国一体化在线监管平台，推动监管数据及执法信息共享和有效利用，明确大数据的经济监测预警，为宏观政策的跨期调节提供数据支撑，推动政府监管工作向更加智能化、高效化的方向发展。	b	b	加强数字政府建设的重要意义在于它能够提高政府工作效率，增强政府治理能力，促进社会治理现代化。以下是几个方面的解释： 1. 提高政府工作效率：数字政府建设通过信息化手段，实现了政府业务信息系统的建设和应用，数据共享和开发利用的积极进展。例如，“最多跑一次”和“一网通办”等创新实践，减少了行政审批的复杂性和繁琐性，提高了服务效率。公众可以通过互联网平台轻松完成各种行政事务，节省时间和精力。 2. 增强政府治理能力：数字技术的应用，如大数据、云计算和人工智能，增强了政府在疫情防控、城市管理等方面的决策支持能力。例如，在疫情防控中，通过人流分析和趋势研判，政府能够及时做出响应，有效控制疫情的传播。城市大脑建设中的智慧交通和应急防汛等，也大大提高了政府应对突发事件的能力。 3. 促进社会治理现代化：数字政府建设推动了监管数据和行政执法信息的归集共享和有效利用，构建了全国一体化在线监管平台。通过大数…	我国加强数字政府建设的重要意义在于提升政府治理能力和效率。通过数字化技术的应用，政府可以更加及时、精准地获取和分析数据，提高决策的科学性和准确性。例如，在疫情防控中，数字技术可以帮助政府实现人流分析和趋势研判，更好地指导防疫工作的开展。此外，数字政府建设也可以推动政府服务的智能化和便捷化，提升政府服务水平，增强人民群众的获得感和满意度。 另外，加强数字政府建设还可以促进政府部门间的信息共享和协同工作，避免信息孤岛和重复劳动，提高行政效能。在国务院提出的《加强数字政府建设的指导意见》中，强调要构建全国一体化在线监管平台，推动监管数据和行政执法信息的归集共享和有效利用，这有助于提高监管的精准度和有效性，减少监管漏洞和腐败现象。 总的来说，加强数字政府建设不仅可以提升政府治理水平，优化政府服务，还可以促进政府工作的透明度和效率，为经济社会发展提供更好的支撑。。	a	b	b	a	model_a	tie
近年来，我国新能源汽车的新型成组技术、高镍无钴电池、半固态电池等突破应用，电池快充和超长续航正在优化新能源汽车的出行,部分车型只需8分钟就可充电80%,续航里程达 500公里。智能化、网联化、信息化等越来越多应用于主流新能源汽车，从防止误操作的功能安全,到智能座舱提供更理想的驾乘姿态,再到声音、触觉、嗅觉等多模态的人机交互……作为全球最大的新能源汽车消费市场，我国累计建成了 398 万个充电桩、1625 座换电站,形成了全球最大规模的充换电网络。2022年上半年,全球新能源汽车销量超过422多万辆,其中中国新能源汽车销量达260多万辆,市场渗透率达21.6%。	结合材料二，运用经济生活知识，说明我国新能源汽车行业快速发展的驱动因素。	新能源汽车自主创新能力提高，市场竞争力增强，新能源车企不断提升产品质量，改善消费者的出行体验，生产出满足消费者需求的优质产品，充换电网络等配套设施不断完善，激发了人们的消费潜能，为扩大新能源汽车消费创造了动力。	我国新能源汽车行业快速发展的驱动因素主要有两点。首先，技术的创新起到了关键作用。新能源汽车是通过新型技术组装而成的，特别是一些化学电池的应用给予了技术性突破。其次，互联网技术的发展也推动了新能源汽车行业的发展。智能化、网联化、信息化越来越多地应用于新能源汽车，使其成为主流。	我国新能源汽车行业快速发展的驱动因素主要包括技术的创新发展、居民消费的增长以及经济的推动。首先，核心技术的突破如新型成组技术、高镍无钴电池、半固态电池等的应用，促进了电池快充、超长续航等方面的优化，推动了新能源汽车的出行体验。其次，智能化、网联化、信息化等技术在新能源汽车中的应用不断增加，从功能安全到驾乘体验的提升，使得新能源汽车越来越受到消费者青睐。最后，我国经济的不断发展也为新能源汽车行业提供了良好的发展前景，带动了整个行业的快速增长。	b	b	我国新能源汽车行业的快速发展受到多重驱动因素的影响，主要包括政策支持、技术创新、市场需求和基础设施建设等方面。 首先，政策支持是推动我国新能源汽车行业发展的重要因素。政府通过制定一系列鼓励政策，如购车补贴、税收优惠、限牌限号等，旨在减少传统燃油车的使用，推动新能源汽车的普及。例如，中国政府曾实施了购车补贴政策，吸引了大量消费者购买新能源汽车。此外，政府还加大了对新能源汽车产业链的投资，支持研发和制造能力的提升。 其次，技术创新是新能源汽车行业发展的关键动力。随着新型成组技术、高镍无钴电池、半固态电池等技术的突破，新能源汽车的电池快充和超长续航能力得到了显著提升。例如，部分车型能够在8分钟内充电80%，续航里程达500公里，这极大地满足了消费者对于出行自由度的需求。 再次，市场需求的增长也是推动新能源汽车行业发展的重要因素。随着环保意识的提升和对新能源汽车技术的认可，消费者对新能源汽车的需…	我国新能源汽车行业快速发展的驱动因素主要包括政策支持、技术创新和市场需求。首先，政府出台了一系列支持新能源汽车发展的政策，比如减少购车税、提供补贴、建设充电桩等，这些政策措施有效地降低了新能源汽车的成本，促进了市场增长。其次，技术创新是推动新能源汽车发展的重要因素，如材料技术的突破、电池技术的改进等都提高了新能源汽车的性能和续航能力，吸引了更多消费者购买。最后，随着环保意识的增强和能源危机的加剧，市场对清洁能源的需求也在不断增加，新能源汽车作为一种环保和节能的交通工具，受到了越来越多消费者的青睐。通过政策支持、技术创新和市场需求的共同作用，我国新能源汽车行业得以快速发展。 。	a	b	b	a	model_a	b
2022年,全国政协及部分全国政协委员围绕“统筹推进绿色低碳高质量发展”做了大量工作。5月20日，全国政协在委员移动履职平台正式开通“统筹推进绿色低碳高质量发展”主题群，及时上传有关参阅材料，组织引导委员参与讨论政协行动6月7日~8日,围绕“发展绿色金融助力传统产业低碳转型”主题,全国政协经济委员会调研组赴贵阳调研,实地考察相关企业,并组织召开座谈会,听取贵阳贵安有关工作情况介绍，同金融机构、企业代表深入交流6月21日，全国政协十三届常委会第二十二次会议，农工党中央代表、民建中央代表等12位常委围绕“统筹推进绿色低碳高质量发展”作大会发言委员建言积极探索市场化运作、可持续的生态产品价值实现路径，建立生态产品交易市场体系；完善金融政策,统筹规划安全可控的绿色科技创新路线图,推动绿色科技创新链产业链融合;将环境法典编纂纳入国家立法规划,采取“适度法典化”模式划定生态保护红线、环境质量底线、资…	结合材料,运用政治生活知识,说明人民政协在推进绿色低碳高质量发展中发挥的作用。	人民政协发挥专门协商机构作用，积极履行政治协商、民主监督和参政议政的职能，为推进绿色低碳高质量发展贡献智慧和力量，人民政协充分发扬民主，为国家绿色低碳高质量发展决策提供参考，人民政协是多党合作的重要机构，紧密团结包括各民主党派在内的各种力量，广泛凝聚共识，为推进绿色低碳高质量发展接续奋斗。	人民政协在推进绿色低碳高质量发展中发挥着重要作用。首先，人民政协组织委员参与讨论，统筹各方意见，形成共识，推动相关政策的制定和落实。其次，人民政协开展实地考察，深入与企业代表等了解情况，提出合理有效的措施，推动企业向绿色低碳发展转型，促进企业升级。同时，人民政协还积极推动市场向绿色低碳发展转型，促进经济的可持续发展。在实践中，人民政协不断发挥着桥梁和纽带的作用，促进各方面的合作，推动绿色低碳高质量发展取得实质性进展。	人民政协在推进绿色低碳高质量发展中发挥着重要作用。首先，人民政协有利于促进我国环境的绿色发展，一定程度上保护环境绿色发展。其次，人民政协有利于积极探索市场化运作，提升可持续的生态产品价值。第三，人民政协有利于我国建立生态产品交易市场体系。最后，人民政协的作用还体现在进一步完善金融政策，促进“一带一路沿线国家能源绿色转型。通过这些作用，人民政协为推进我国绿色低碳高质量发展发挥着重要的推动作用。	b	tie	在推进绿色低碳高质量发展的过程中，人民政协发挥了重要的作用。首先，政协作为中国特色社会主义政治协商制度的重要组成部分，提供了一个多党合作和政治协商的平台。通过政协的工作，各方面的意见和建议得以汇集和交流，形成了更加全面和多元的政策建议。 其次，政协委员的履职活动促进了绿色低碳高质量发展的深入研究和实践。例如，通过委员移动履职平台的开通，政协加强了与委员的联系，确保了委员能够及时了解最新的政策动态和社会需求，并将这些信息反馈到政协的工作中。同时，政协组织的调研活动，如经济委员会调研组赴贵阳的调研，实地考察企业，召开座谈会等，帮助政协更好地了解地方实际，提出切实可行的建议。 再次，政协常委会的会议提供了一个高层次的政策讨论和决策平台。如在2022年6月21日的全国政协十三届常委会第二十二次会议上，常委们围绕“统筹推进绿色低碳高质量发展”进行了深入的讨论和发言，提出了一系列建设性的建议。这些建…	人民政协在推进绿色低碳高质量发展中发挥着重要作用。首先，人民政协通过组织讨论、调研考察等形式，促进了各界人士对绿色低碳发展的深入理解和共识形成。例如，全国政协经济委员会调研组赴贵阳调研，实地考察相关企业，并进行座谈会，有助于了解实际情况，提出可行建议。 其次，人民政协通过提出建言献策，推动相关政策的制定和完善。例如，委员们建议探索市场化运作、生态产品交易市场体系的建立，完善金融政策，推动绿色科技创新等，这些建议有助于指导政府相关部门出台更加有效的政策措施。 最后，人民政协还可以通过发挥舆论监督作用，推动绿色低碳高质量发展的实施。通过常委会会议等形式，委员们就相关议题进行发言，引导舆论关注和支持绿色低碳发展，提高社会各界对此的认识和参与度。 总的来说，人民政协在推进绿色低碳高质量发展中发挥着协商议政、建言献策、舆论监督等多方面的作用，为绿色低碳发展提供了重要支持和推动。。	a	b	b	b	model_a	b
2022年,全国政协及部分全国政协委员围绕“统筹推进绿色低碳高质量发展”做了大量工作。5月20日，全国政协在委员移动履职平台正式开通“统筹推进绿色低碳高质量发展”主题群，及时上传有关参阅材料，组织引导委员参与讨论政协行动6月7日~8日,围绕“发展绿色金融助力传统产业低碳转型”主题,全国政协经济委员会调研组赴贵阳调研,实地考察相关企业,并组织召开座谈会,听取贵阳贵安有关工作情况介绍，同金融机构、企业代表深入交流6月21日，全国政协十三届常委会第二十二次会议，农工党中央代表、民建中央代表等12位常委围绕“统筹推进绿色低碳高质量发展”作大会发言委员建言积极探索市场化运作、可持续的生态产品价值实现路径，建立生态产品交易市场体系；完善金融政策,统筹规划安全可控的绿色科技创新路线图,推动绿色科技创新链产业链融合;将环境法典编纂纳入国家立法规划,采取“适度法典化”模式划定生态保护红线、环境质量底线、资…	运用经济生活知识，分析政协委员的建言对我国推进绿色低碳高质量发展的启示。	充分发挥市场在生态资源配置中的决定性作用，实现生态产品价值的有效转换，综合利用经济手段和法律手段实施科学宏观调控，为推进绿色低碳高质量发展提供货币政策支持和法律保障，贯彻落实新发展理念，推动绿色科技创新，提高产业链供应链的绿色科技水平，提高开放型经济水平，推动绿色生态企业走出去。	政协委员的建言对我国推进绿色低碳高质量发展提供了重要的启示。首先，绿色低碳高质量发展有利于我国形成良好的绿色发展环境，这对于提高生产力和保护环境具有重要意义。其次，绿色发展是生产的重要要素，有利于促进我国的发展，更好地满足人民需求，维护市场环境的健康。最后，推进绿色低碳高质量发展有利于优化经济发展结构，节约能源，保护环境。 因此，我们应该认识到绿色低碳高质量发展的重要性，努力实现金山银山不再是唯一追求，同时也要注重绿水青山的保护。只有在绿色发展的道路上不断前行，我们才能实现经济可持续发展，为未来留下更美好的环境和生活。	建议建立多态产品交易市场体系，有利于推动我国经济增长，完善相关产业链，增强我国生产的韧性。国家立法有助于加强宏观调控，对市场经济体系风险进行弥补。同时，鼓励“走出去”，加强我国对外经济联系，使我国经济发展与实现共同富裕相结合。	b	b	政协委员的建言对于我国推进绿色低碳高质量发展具有重要的启示性和指导意义。首先，委员们提出了积极探索市场化运作和可持续生态产品价值实现路径，这强调了绿色经济的市场机制在推动绿色低碳发展中的作用。通过建立生态产品交易市场体系，可以更有效地将环境保护与经济发展相结合，促进绿色产品的生产和消费。 其次，委员们提出了完善金融政策，统筹规划安全可控的绿色科技创新路线图，以及推动绿色科技创新链产业链融合。这些建议体现了科技创新在绿色低碳发展中的核心作用。通过政策支持和金融激励，可以鼓励企业投入绿色科技研发，推动产业升级和技术进步，从而实现绿色低碳发展的技术和产业链融合。 再者，委员们提出了将环境法典编纂纳入国家立法规划，并采取“适度法典化”模式划定生态保护红线、环境质量底线、资源利用上线。这表明了法律法规在确保绿色低碳发展的重要性。通过明确的法律框架，可以加强环境保护，确保生态系统的健康和可持续利用。…	政协委员的建言体现了在推进绿色低碳高质量发展过程中需要注重市场化运作、生态产品交易、金融政策完善、绿色科技创新、环境法典编纂等多方面的措施。这些建言启示我们，在推进绿色低碳高质量发展过程中，需要多方面的政策支持和产业合作。例如，建立生态产品交易市场体系可以促进绿色产品的发展和市场化运作；完善金融政策可以为绿色科技创新提供更多资金支持；适度法典化模式的环境法典编纂可以为生态保护和资源利用提供法律保障。因此，政协委员的建言为我们指明了在绿色低碳高质量发展中的具体方向和政策举措。 。	a	b	b	a	model_a	b
《人民日报》于2021年11月19日发表评论员文章《增强全面从严治党永远在路上的坚定和执着-—论学习贯彻党的十九届六中全会精神》。文章指出，办好中国的事情，关键在党，关键在党要管党、全面从严治党。党的十九届六中全会深入研究党加强自身建设、推进自我革命的百年历程,充分肯定党的十八大以来在全面从严治党上取得的历史性、开创性成就，把“坚持自我革命”概括为党百年奋斗的十条历史经验之一，强调全党必须铭记生于忧患、死于安乐，常怀远虑、居安思危，继续推进新时代党的建设新的伟大工程，坚持全面从严治党,坚定不移推进党风廉政建设和反腐败斗争,做到难不住、压不垮,推动中国特色社会主义事业航船劈波斩浪、一往无前。	结合材料，运用“中国共产党的先进性”的知识，说明新时代我们党为什么要坚持自我革命、全面从严治党。	中国共产党是我国的执政党，坚持自我革命、全面从严治党，有助于加强党的先进性和纯洁性，坚定不移推进党风廉政建设和反腐败斗争。中国特色社会主义事业以中国共产党为领导核心，坚持自我革命、全面从严治党，有助于提高我们党的执政能力和水平，巩固执政地位，继续推进新时代党的建设新的伟大工程。中国共产党的性质和宗旨决定了它代表最广大人民的根本利益，坚持自我革命、全面从严治党有助于保证党始终把实现好、维护好、发展好最广大人民的根本利益作为一切工作的出发点和落脚点，保证发展成果由人民共享。	新时代我们党要坚持自我革命、全面从严治党，是因为这是中国共产党的先进性的体现。勇于自我革命是我们党区别于其他政党的显著标志，只有不断深化自身建设，推动自我完善，我们党才能永远走在时代前列，确保党领导一切的核心地位。办好中国事情的关键在于党要管党，全面从严治党。只有推动全面从严治党纵深发展，加强党的自身建设，坚定不移地推进党风廉政建设和反腐斗争，才能树立党的威信，确保党的工作在人民群众中顺利开展。坚持自我革命、全面从严治党可以保障党自身的纯洁性，使党的思想与时俱进，确保我们党始终走在时代前列，实现我们党的历史使命。	从而保持党的先进性和纯洁性，确保党始终成为中国人民的主心骨。只有通过自我革命、全面从严治党，才能不断提高党的凝聚力和战斗力，确保党永葆生机、永不腐化，为实现中华民族伟大复兴的中国梦不断奋斗。只有这样，我们党才能始终赢得人民群众的信任和拥护，始终走在时代前列，成为具有强大凝聚力和战斗力的先进政党。	a	a	中国共产党的先进性是指党始终代表中国先进社会生产力的发展要求，代表中国先进文化的前进方向，代表中国最广大人民的根本利益。为了保持和增强党的先进性，中国共产党在新时代中坚持自我革命、全面从严治党是非常必要的。 首先，党的先进性需要不断地通过自我革命来实现。自我革命是指党不断加强自身建设，推进自我净化、自我完善、自我革新、自我提高的过程。通过自我革命，党能够不断更新思想、加强组织、提高能力，从而更好地适应时代发展的需要，确保党始终与时俱进。 其次，全面从严治党是实现党的先进性和纯洁性的重要途径。全面从严治党包括加强党的纪律建设、加强党的组织生活、加强党的监督检查等方面的工作。通过这些措施，可以有效防止和打击腐败现象，确保党的领导力和先进性。 再次，党的十九届六中全会强调了“坚持自我革命”是党百年奋斗的十条历史经验之一。这表明自我革命已经成为党的长期战略和基本方略。通过坚持自我革命，党能够不断…	根据《人民日报》评论员文章的内容和中国共产党的先进性的知识，我们可以得出新时代我们党要坚持自我革命、全面从严治党的重要性和必要性。首先，中国共产党作为执政党，必须始终保持高度的先进性和纯洁性，不断自我净化、自我完善，以保持党的先进性和领导地位。只有通过自我革命，党才能不断提高自身的凝聚力和战斗力，引领全国人民不断向前发展。其次，全面从严治党是确保党始终保持先进性的关键举措。只有通过从严治党，才能有效防止腐败现象的发生，确保党员干部始终忠诚、干净、担当，维护党同人民群众的血肉联系。同时，全面从严治党也能够提高党的执行力和战斗力，使党始终立于不败之地，引领中国特色社会主义事业不断前行。 因此，新时代我们党要坚持自我革命、全面从严治党是为了保持党的先进性、巩固党的执政地位，确保党始终与人民群众心连心、同呼吸、共命运，推动中国特色社会主义事业不断取得新的胜利。 。	b	a	tie	b	stud_a	tie
十三届全国人大常委会第二十二次会议经审议,表决通过修订后的《未成年人保护法》,于2021年6月1日起正式施行。《未成年人保护法》自2018年全国人大常委会启动修订工作,历经全国人大常委会三次审议，三次公开征求社会意见，使法律条款更加完善、充实，尤其是在监护制度方面，做出了很多创新、细化、操作性强的规定，亮点颇多。亮点1:新法对监护人的监护职责作出全面规定,未成年人的父母或者其他监护人应当为未成年人提供生活、健康、安全等方面的保障,关注未成年人的生理、心理状况和情感需求，保障未成年人休息、娱乐和体育锻炼的时间等。亮点2:在预防和处置性侵或者欺凌等问题上,新法特别规定,学校应当建立学生欺凌防控工作制度，对教职员工、学生等开展防治学生欺凌的教育和培训。	运用政治与法治知识，说明《未成年人保护法》的修订是如何体现我国人民民主特点的	新修订的《未成年人保护法》公开征求了社会意见，并经全国人大常委会表决通过，保障了人民的权益，尊重了人民当家作主的地位，体现了社会主义民主是最管用的民主。全国人大常委会审议通过修订后的《未成年人保护法》，进一步完善、充实了监护制度，为未成年人权益的实现提供了法律和制度保障，体现了社会主义民主是最真实的民主。新法对监护人的监护职责、在预防和处置性侵或者欺凌等问题上作出特别规定，保障未成年人的生命健康、休息、娱乐、体育锻炼、被监护的权利等，体现了社会主义民主是最广泛的民主。	修订《未成年人保护法》体现了我国人民民主特点。该法在内容上保障了未成年人的权利，主体上关注未成年人，体现了广泛的民主精神。修订后的法律更加完善、充实，也做出了很多创新，切实保障了未成年人的利益，体现了我国人民民主的实效性。此外，该法三次公开征求社会意见，由人民代表大会常务委员会审议、表决通过，充分体现了我国真实的民主制度。	体现了我国人民在立法过程中的参与和表达权利，充分体现了我国人民民主的特点。通过对未成年人保护法的修订，政府更加重视未成年人权益的保护，保障了未成年人的合法权益，体现了以人民为中心的发展思想。修订后的法律更加符合社会实际情况，更有利于未成年人的成长和健康发展，进一步推动了我国社会主义法治建设的进程。	a	a	《未成年人保护法》的修订体现了我国人民民主特点在以下几个方面： 1. 全面征求社会意见：修订过程中，全国人大常委会不仅仅是内部审议，还通过三次公开征求社会意见，这体现了人民群众的知情权和参与权。社会各界的意见和建议被充分听取，确保了法律的立法过程更加透明和民主。 2. 监护制度的创新：新法对监护人的监护职责作出了全面规定，强调了监护人的责任和义务，这反映了我国法律对保护未成年人权益的重视。这种规定不仅仅是对现有法律的完善，更是对社会公众利益的体现，体现了人民民主的实质，即人民是国家的主体，国家的法律和政策应当服务于人民的根本利益。 3. 预防和处置性侵和欺凌的规定：新法特别强调了学校在预防和处置学生欺凌方面的责任，要求学校建立学生欺凌防控工作制度，并对教职员工和学生进行防治教育和培训。这体现了我国法律对未成年人权益的高度重视，以及对社会公平正义的追求。通过这样的规定，法律不仅仅是对现有问…	《未成年人保护法》的修订体现了我国人民民主特点的几个方面。首先，修订过程中广泛征求社会意见，三次公开征求社会意见，充分尊重了人民群众的意见和诉求，体现了我国民主决策的特点。其次，新法对监护人的监护职责作出全面规定，重点关注未成年人的生理、心理状况和情感需求，保障未成年人的基本权益，体现了以人民为中心的发展思想。最后，新法在预防和处置性侵或者欺凌等问题上做出了特别规定，加强了学校对学生欺凌的防治工作，体现了我国政府对未成年人权益保护的高度重视和承诺。综上所述，修订后的《未成年人保护法》充分体现了我国人民民主特点，尊重人民的意愿，关注未成年人权益，加强了未成年人保护工作。	b	a	a	b	stud_a	a
当前,非法买卖电话卡、银行卡用于电信网络诈骗及其他相关违法犯罪活动的问题日益突出，严重损害人民群众切身利益，严重侵蚀社会诚信根基。最高人民法院、最高人民检察院、公安部、工业和信息化部、中国人民银行联合发布《关于依法严厉打击惩戒治理非法买卖电话卡银行卡违法犯罪活动的通告》,明确以“零容忍”的态度严厉打击非法买卖电话卡、银行卡(以下简称“两卡”)违法犯罪活动,进一步加强行业监管,在全国范围内对涉“两卡”违法犯罪人员实施惩戒,深入推进“断卡”行动,全力斩断非法买卖“两卡”黑灰产业链条。据统计,2020年10月至2021年10月,全国公安机关累计打掉涉“两卡”违法犯罪团伙2.7万个,查处违法犯罪嫌疑人45万名,查处金融机构和通信企业内部人员1000余名,打击了犯罪分子的嚣张气焰,取得了阶段性成效。	结合材料，运用人民民主专政的有关知识，说明国家严厉打击非法买卖“两卡”违法犯罪活动的必要性。	我国是人民民主专政的社会主义国家，人民是国家的主人。国家严厉打击非法买卖“两卡”违法犯罪活动，有利于保障人民当家作主的地位。人民民主专政的国家政权担负着对极少数敌对分子实行专政，国家严厉打击非法买卖“两卡”违法犯罪活动，有利于保障人民群众财产安全，维护社会公共秩序，促进社会和谐。国家对内履行维护国家稳定，促进社会发展的职能。国家严厉打击非法买卖“两卡”违法犯罪活动，有利于促进经济社会健康发展，为社会主义现代化建设提供可靠保障。	因此，国家严厉打击非法买卖“两卡”违法犯罪活动，是确保人民群众的切身利益不受侵害，维护社会的诚信根基，落实全面依法治国的重要举措。只有采取零容忍的态度，实行专政打击，才能有效地保护广大人民的合法权益，确保人民民主专政的顺利实施。在我国，人民至上的原则决定了对“两卡”违法犯罪活动必须严厉打击，才能真正实现人民民主专政的目标。	国家严厉打击非法买卖“两卡”违法犯罪活动的必要性在于我国的国体是人民民主专政。根据人民民主专政的原则，国家有权依法打击危害社会稳定和经济发展的人员。非法买卖“两卡”严重损害了广大人民群众的利益，影响社会秩序和经济发展。因此，国家必须严厉打击这种违法犯罪活动，维护人民群众的合法权益，保障社会的稳定和发展。	b	b	国家严厉打击非法买卖“两卡”违法犯罪活动的必要性在于保护人民群众的切身利益和维护社会诚信基础。非法买卖电话卡和银行卡为电信网络诈骗等犯罪活动提供了工具和途径，这些犯罪活动不仅侵犯了个人财产权和隐私权，还可能导致社会秩序的混乱和信任的破坏。 人民民主专政是中国特色社会主义的基本政治制度之一，它强调通过法律手段和行政手段，通过人民代表大会制度、人民政协制度、人民法院制度、人民检察院制度等，实现对反动派和其他破坏社会秩序的反动分子的一致打击。非法买卖“两卡”违法犯罪活动正是这种破坏行为的体现，因此，国家必须采取有效措施来打击这些活动。 通过联合发布《关于依法严厉打击惩戒治理非法买卖电话卡银行卡违法犯罪活动的通告》，最高人民法院、最高人民检察院、公安部、工业和信息化部、中国人民银行等部门共同发起了对非法买卖“两卡”违法犯罪活动的全面的打击。这些措施包括加强行业监管、断卡行动、打击犯罪团伙和嫌疑人…	国家严厉打击非法买卖“两卡”违法犯罪活动的必要性主要体现在以下几个方面：首先，这些违法犯罪活动严重损害了人民群众的切身利益，给人们的生活和财产安全带来了严重威胁，破坏了社会的和谐稳定。其次，非法买卖“两卡”违法犯罪活动侵蚀了社会诚信根基，破坏了市场经济秩序，影响了国家的经济发展和社会进步。再次，这些活动还有可能导致其他更严重的犯罪活动，如电信网络诈骗等，给社会治安带来极大隐患。因此，国家必须以“零容忍”的态度严厉打击这些违法犯罪活动，维护国家法律权威，保障人民群众的合法权益和社会安全稳定。 。	a	b	b	a	model_a	b
全国人大常委会深入贯彻落实党中央有关生态环境保护的重大决策部署，坚持在法治轨道上推进生态文明建设。三年来，制定土壤污染防治法、长江保护法、生物安全法，修改固体废物污染环境防治法等,共完成了12部生态环境保护法律的制定修改工作。与此同时,开展大气污染防治法、水污染防治法、土壤污染防治法执法检查,还组织开展了海洋环境保护法、可再生能源法,关于全面禁止野生动物非法交易和食品的决定和野生动物保护法的执法检查,重点了解法律制度的落实情况、法定职责的履行情况。对于执法检查中发现的突出违法问题,由国务院有关部门纳入中央生态环保督察“回头看”的范畴加以督促解决。	运用政治与法治知识,说明全国人大常委会在推进生态环境保护工作中行使了哪些职权。（4分）	全国人大常委会完成了12部生态环境保护法律的制定修改工作，行使了立法权。全国人大常委会组织开展生态环境保护相关法律的执法检查，行使了监督权。	全国人大常委会在推进生态环境保护工作中行使了立法权和监督权。在立法方面，他们共完成了12部生态环境保护法律的制定修改工作。而在监督方面，重点关注法律制度的落实情况和法定职责的履行情况。	全国人大常委会在推进生态环境保护工作中行使了最高立法权，这体现在其三年来制定了众多有关环境保护法的举措上。同时，在执法检查过程中，国务院有关部门向其督促解决问题，也显示了全国人大常委会行使了最高监督权。	a	a	全国人大常委会在推进生态环境保护工作中，主要行使了以下职权： 1. 立法职权：全国人大常委会通过制定和修改相关法律，如土壤污染防治法、长江保护法、生物安全法等，来规范生态环境保护的行为，确保法律制度的完善和更新。例如，通过修改固体废物污染环境防治法，进一步加强了废物管理和处理的法律规定。 2. 监督职权：全国人大常委会通过开展执法检查，如大气污染防治法、水污染防治法、土壤污染防治法的检查，来监督政府部门和地方的生态环境保护工作，确保法律的有效执行。同时，通过组织海洋环境保护法、可再生能源法等领域的执法检查，进一步加强了对不同环境领域的监管。 3. 法律监督职权：全国人大常委会通过对执法检查中发现的突出违法问题的跟踪和督促，确保问题得到及时解决。例如，将这些问题纳入中央生态环保督察“回头看”的范畴，加强对地方政府的责任追究，促进生态环境保护的持续改进。	全国人大常委会在推进生态环境保护工作中行使了立法职权和监督职权。通过制定土壤污染防治法、长江保护法、生物安全法等一系列法律，对生态环境保护进行了规范和强化。同时，全国人大常委会还对相关法律的执行情况进行监督检查，督促有关部门切实履行生态环境保护的法定职责，确保法律制度的有效落实。这些举措体现了全国人大常委会在生态环境保护工作中的重要职能，为推动生态文明建设作出了积极贡献。 。	tie	a	a	tie	stud_a	a
全国人大常委会深入贯彻落实党中央有关生态环境保护的重大决策部署，坚持在法治轨道上推进生态文明建设。三年来，制定土壤污染防治法、长江保护法、生物安全法，修改固体废物污染环境防治法等,共完成了12部生态环境保护法律的制定修改工作。与此同时,开展大气污染防治法、水污染防治法、土壤污染防治法执法检查,还组织开展了海洋环境保护法、可再生能源法,关于全面禁止野生动物非法交易和食品的决定和野生动物保护法的执法检查,重点了解法律制度的落实情况、法定职责的履行情况。对于执法检查中发现的突出违法问题,由国务院有关部门纳入中央生态环保督察“回头看”的范畴加以督促解决。	结合材料,运用政治与法治知识,说明全国人大常委会开展生态环境保护相关法律的执法检查的积极作用。（12分)	全国人大常委会开展执法检查是坚持党的领导的要求，有利于促进党中央有关生态环境保护的重大决策部署的贯彻实施。全国人大常委会是全国人大的常设机关，具有监督权。开展执法检查有利于督促政府履职尽责、依法行政，改善生态环境。人民代表大会制度坚持民主集中制，开展执法检查有利于推动各地区各部门切实担负起法定责任，贯彻中央决策部署。	全国人大常委会开展生态环境保护相关法律的执法检查，具有以下积极作用：首先，可以减少违法问题，使法律制度落实更加规范；其次，可以监督法律制度的落实和法定职责的履行，推动生态文明建设，促进绿色发展；另外，执法检查可以打击不法分子，发现违法情况可尽快解决；最后，通过宣传普及法律知识，使其深入人心，增加公民的法治意识。总的来说，全国人大常委会开展生态环境保护相关法律的执法检查，对于维护生态环境、推动社会发展具有重要意义。	全国人大常委会开展生态环境保护相关法律的执法检查，对于维护生态环境起到了重要作用。首先，通过对破坏环境的依法整治，及时作出调整，有效遏制了环境污染的现象，从根本上保护了生态环境的稳定。其次，执法检查中发现的问题能够由国务院有关部门加以督促解决，体现了对环境保护的重视，为营造良好的生态环境奠定了基础。此外，在检查过程中不断完善相关法律法规，推动了法治转道上的生态文明建设，加强了生态建设，保护了人们的身体健康。最终，保障了我国建设社会主义现代化强国的目标，引导着全社会积极投入到社会主义建设当中，共同推动国家发展进程。	a	a	全国人大常委会开展生态环境保护相关法律的执法检查具有积极作用，主要体现在以下几个方面： 1. 法律制度的有效实施：通过执法检查，全国人大常委会能够确保生态环境保护的法律制度得到有效实施，保障环境法规得到正确理解和执行。例如，通过对大气污染防治法、水污染防治法、土壤污染防治法的执法检查，可以确保这些法律的具体规定得到各级政府和相关部门的严格执行。 2. 法定职责的履行监督：执法检查有助于监督各级政府和相关部门履行其在生态环境保护方面的法定职责。通过检查，可以发现并纠正那些未能履行职责的行为，促使相关部门加强环境保护工作。 3. 强化法律威慑力：执法检查能够增强法律的威慑力，减少违法行为的发生。对于那些在执法检查中被发现的突出违法问题，国务院有关部门会将其纳入中央生态环保督察“回头看”的范畴，加以督促解决，这有助于提高违法成本，减少环境污染。 4. 提升公众环境意识：通过执法检查，公众可以更…	全国人大常委会开展生态环境保护相关法律的执法检查具有以下积极作用： 首先，执法检查可以促使地方政府和相关部门切实履行生态环境保护的法定职责，确保法律政策的有效实施。通过对各项法律的执行情况进行检查，可以及时发现和解决违法违规问题，提高全社会对生态环境保护工作的认识和重视程度。 其次，执法检查可以推动立法的完善和修订。通过检查中发现的问题和不足，可以为相关法律的修订提供依据和方向。同时，也可以为新的生态环境保护法律的制定提供经验和借鉴，不断完善法律体系，加强对生态环境的保护。 再次，执法检查可以强化监督和问责机制，促使责任人履行职责。对于发现的违法问题，相关部门必须及时采取有效措施进行整改和处理，确保环境保护工作的顺利进行，避免违法行为对生态环境造成进一步破坏。 综上所述，全国人大常委会开展生态环境保护相关法律的执法检查，能够有效推动生态环境保护法律的贯彻执行，促进法律的完善和修订，加强监…	tie	tie	tie	tie	tie	tie
2022 年 3 月 5 日至 11 日，第十三届全国人民代表大会在北京召开。会议应出席代表 2951 人。全国 55 个少数民族都有自己的代表。会议审议批准了《政府工作报告》和其他报告，审议通过了《关于修改地方组织法的决定》及其它提请审议的议案。会议取得的成果,进一步激发了全国各族人民在以习近平同志为核心的党中夹坚强领导下意气风发、步调一致向前进的坚定决心。柔战书指出，在以习近平同志为核心的党中央坚强领导下，在党和国家事业大踏步前进的时代背景下，本届全国人大及其常委取得的新的成绩得益于依法正确行使权力、履行职责。既支持“一府一委两院”高效推进各项事业,又确保行政权、监察权、审判权、检察权依法正确行使。	结合材料,谈谈十三届全国人大五次会议是如何体现人民代表大会制度的优越性的。	人民代表大会制度保障了人民当家作主。十三届全国人大五次会议审议批准了政府工作报告，审议通过了关于修改地方组织法的决定等，说明全国人大代表代表人民统一行使了国家权力，有利于保障人民当家作主。人民代表大会制度动员了全体人民以国家主人翁的姿态投身社会主义建设。通过本次大会，调动了人民群众的积极性，激发了全国各族人民在习近平同志为核心的党中央坚强领导下，步调一致向前进的坚定决心。人民代表大会制度保证了国家机关协调高效的运转。人大既支持一府一委两院高效推进各项事业，又确保了行政权、监察权、审查权、检察权依法正确行使，提高了工作效率。人民代表大会制度维护了国家统一和民族团结。这次大会，全国55个少数民族都有自己的代表，有利于巩固平等团结互助和谐的社会主义民族关系，实现各民族大团结。人民代表大会制度是坚持党的领导、人民当家作主、依法治国有机统一的根本政治制度的安排，体现了中国特色社会主义制度的优势。全…	在十三届全国人大五次会议上，会议取得的成果进一步激发了全国各族人民在以习近平同志为核心的党中央坚强领导下意气风发，步调一致向前进的坚定决心。全国人民代表大会制度是我国的根本政治制度，在这次会议中，体现了人民代表大会制度的行使行政权、监督权、审查权和检察权，确保依法正确行使。	第十三届全国人大五次会议充分体现了人民代表大会制度的优越性。在会议上，代表们审议批准了《政府工作报告》和其他报告，通过了《关于修订地方组织法的决定》等重要议案。这充分体现了人民代表大会制度的特点，即代表们代表人民的利益，行使立法权和监督权，为国家的政治决策提供民意基础。人民代表大会制度保障了人民的民主权利，使人民能够通过选举产生代表，参与国家事务的管理和监督，保障了国家的长治久安。	a	a	十三届全国人大五次会议体现人民代表大会制度的优越性主要体现在以下几个方面： 1. 全面代表性：会议上有2951名代表出席，覆盖了全国55个少数民族的代表，这保证了会议的代表性，确保了各族人民的利益得到代表和保护。 2. 法治民主：会议审议并批准了《政府工作报告》和其他报告，以及《关于修改地方组织法的决定》等议案，这体现了人民代表大会制度下的法律面前人人平等，决策过程的透明和民主。 3. 高效决策：会议通过的决策有助于推动国家事业的发展，体现了人民代表大会制度下的决策效率和执行力。 4. 权力制约：会议的召开和决策过程体现了人民代表大会制度下的权力制约机制，确保了行政权、监察权、审判权、检察权的正确行使。 5. 坚强领导：在习近平同志为核心的党中央的坚强领导下，全国人大及其常委会取得的新成绩，进一步证明了人民代表大会制度在坚强党领导下的优越性。	根据材料可以看出，十三届全国人大五次会议充分体现了人民代表大会制度的优越性。首先，会议应出席代表2951人，代表了全国各族人民的利益和意愿，实现了代表制度的基本要求。其次，全国55个少数民族都有自己的代表参与会议，体现了尊重和保障少数民族的权益，体现了多民族国家的民主制度优势。此外，会议审议通过了关于修改地方组织法的决定等议案，表明会议代表们在依法行使权力、履行职责方面有所成果，进一步巩固了人民代表大会制度的法治基础。最后，柔战书指出在以习近平同志为核心的党中央坚强领导下，全国人大及其常委取得的新成绩得益于正确行使权力，显示了人民代表大会制度在党的领导下的优越性。综上所述，十三届全国人大五次会议充分体现了人民代表大会制度的优越性，为全国各族人民的发展和进步提供了坚实的制度保障。 。	a	b	a	a	model_a	a
2021年2月25日16时,北京市朝阳区太阳宫北街1号,“国务院扶贫开发领导小组”的牌子已经永久性摘下, “国家乡村振兴局”的牌子正式挂上。这既是我国脱贫攻坚战取得全面胜利的一个标志,也是全面实施乡村振兴,奔向新生活、新奋斗的起点。《乡村振兴战略规划(2018-2022年)》是我国出台的第一个全面推进乡村振兴战略的五年规划。规划指出，健全现代乡村治理体系需要加强农村群众性自治组织建设。规范村民委员会等自治组织选举办法,健全民主决策程序。依托村民会议、村民代表会议、村民议事会、村民理事会等,形成民事民议、民事民办、民事民管的多层次基层协商格局。创新村民议事形式,完善议事决策主体和程序,落实群众知情权和参与权。全面建立健全村务监督委员会,健全务实管用的村务监督机制,推行村级事务阳光工程。充分发挥自治章程、村规民约在农村基层治理中的独特功能,弘扬公序良俗。开展以村民小组或自然村为基本单元的村民…	结合材料,运用基层群众自治的知识,谈谈村民可以通过哪些途径推进乡村振兴。	完善村民委员会等基层自治组织的选举办法，规范村民民主选举。坚持基层民主协商，形成民事民议，民事民办，民事民管的多层次基层协商格局，使民主协商贯穿基层治理的全过程。完善民主决策制度，创新村民议事形式，完善议事决策程序，落实群众知情权和决策权。加强民主管理，发挥村民自治章程，村规民约等在农村基层治理中的作用，规范村民和村干部的行为，推进乡村治理的民主化。加强民主监督，通过健全村务监督机制、推行村级事务阳光工程等方式，保证村民切实监督村委会和村干部的行为，推动乡村振兴战略的落实。	加强农村群众性自发组织建设是现代乡村治理体系的重要组成部分。为推进乡村振兴，村民可以通过规范村民委员会等自治组织的选举办法，完善民主决策程序，依托村民会议、村民代表会议、村民议事会、村民理事会等多层次基层协商制度，实现民事民议、民事民办、民事民管。创新村民议事形式，健全议争决策主体和程序，落实群众知情权和参与权。同时，建立健全村务监督委员会和务实管用的村务监督机制，推行村级事务阳光工程，发挥村规民约在基层治理中的独特功能，弘扬公序良俗。继续开展村民自治试点工作，加强基层监管，促进村民委员会与村民的联系和指导。这些举措将有助于促进乡村振兴，推动现代乡村治理体系的建设。	村民可以通过开展以村民小组或自然村为单位的村民自治试点工作来推进乡村振兴。同时，他们可以充分利用该地区特产和民俗文化，发展经济农村，为乡村振兴注入动力。此外，村民还可以积极参与乡村建设，努力工作，学习相关知识，为乡村振兴贡献力量。	a	a	村民可以通过以下途径推进乡村振兴： 1. 参与村民会议、村民代表会议和村民议事会：这些会议是村民表达意见、参与决策的重要平台。村民可以在这些会议上提出建议和意见，参与到乡村振兴的规划和实施中。 2. 选举和参与村民委员会的选举：村民委员会是乡村振兴的主要执行机构，村民可以通过选举参与到村委会的选举中，选择代表自己的利益和愿望。 3. 参与基层协商：通过村民会议、村民代表会议、村民议事会、村民理事会等多层次的基层协商机制，村民可以参与到乡村振兴的决策过程中，形成民事民议、民事民办、民事民管的多层次基层协商格局。 4. 推动村务监督委员会的建立和完善：村务监督委员会是监督村务决策和执行的机构，村民可以参与到监督委员会的建立和完善中，确保乡村振兴的决策和执行符合村民的利益。 5. 推行村级事务阳光工程：通过阳光工程，村民可以监督村级决策和执行过程，提高乡村治理的透明度和公正性。 6. 发挥自治…	村民可以通过以下途径推进乡村振兴： 1. 参与村民自治组织建设，积极参加村民会议、村民代表会议、村民议事会、村民理事会等活动，形成民事民议、民事民办、民事民管的多层次基层协商格局。 2. 参与村民议事形式的创新，完善议事决策主体和程序，落实群众知情权和参与权，推动村务监督委员会的健全发展，推行村级事务阳光工程，实现基层民主决策。 3. 积极参与自治章程、村规民约的制定和执行，弘扬公序良俗，促进村民自治的规范化和制度化建设。 4. 参与村民自治试点工作，以村民小组或自然村为基本单元，探索基层治理的新模式，推动乡村振兴的全面实施。 5. 加强基层纪委监委对村民委员会的联系和指导，保障基层民主自治的纪律性和规范性。 通过以上途径，村民可以积极参与乡村振兴工作，推动乡村振兴战略的顺利实施，实现乡村经济社会的全面发展。 。	a	b	a	a	model_a	a
家庭是社会的基本细胞,家庭的前途命运同国家和民族命运紧密相连。党的十九届四中全会明确要求将家庭教育立法纳入全国人大常委会立法规划。十三届全国人大三次会议上，有全国人大代表捉出相关议案12件，建议启动家庭教育立法。全国人大常委会将家庭教育立法纳入2020年度立法工作计划,通过向全国31个省人大书面征求意见、实地调研、召开专家座谈会等方式,广泛听取各方意见。在历经三次审议草案后, 2021年10月,第十三届全国人大常委会第三十一次会议审议通过了《中华人民共和国家庭教育促进法》,该法于2022年1月1日起施行。教育部、司法部等部门贯彻部署,加强宣传普及和实践引导，支持家长履行家庭教育责任，把法律规定转化为家长的自觉行动。	结合材料，运用所学政治与法治的知识分析，不同的主体是如何推进全面依法治国的。	党提出立法建议，编纂家庭教育法是落实党的十八届四中全会战略部署的要求，体现了中国共产党领导立法、依法执政。全国人大行使最高立法权，立法草案广泛征求社会公众意见，坚持了民主立法、科学立法，促进了中国特色社会主义法治体系的完善，有利于推进国家治理体系和治理能力现代化。政府坚持依法行政，推进法治政府建设，全面履行政府职能、坚持规范执法、公正执法、文明执法，为促进家庭教育营造安定有序的社会环境。司法机关要公正司法，要严格遵守法律制度，加强对家庭教育相关案件审理工作的监督和指导，充分发挥法律的震慑作用。推动全民守法，加强普法教育，增强公民法律意识、法治观念，依法支持和配合家庭教育工作。	不同主体推进全面依法治国的方式各有侧重，政府和有关部门需要依法执政公平公证，国家依法开展社会治理并完备法律体系、严格实施法律，全面推进依法治国要坚持法治国家法治政府、法治社会一体化推进。人民则需要坚持党的政治领导，做一个知法、守法的好公民，有关部门要贯彻部署、加强宣传普及和实践去引导，支持家长履行家庭教育责任，把法律转化为家长的自觉行动力。通过各个主体的努力和配合，全面依法治国的目标才能够更好地实现。	不同主体推进全面依法治国的方式有以下几个方面：首先，要坚持法律面前人人平等的原则，保障每个人在法律面前都是平等的。其次，要按照科学立法、严格执法、公正司法、全民办法的方针推进法治建设，确保法律的公正性和权威性。此外，还要推进公正司法，保障司法的公开公正性。同时，要让人守法，从人知法、人人学法、人人用法，让法律走进人们的生活，使每个人都能够遵守法律。这些措施将有助于不同主体共同推进全面依法治国的进程。	a	a	在全面依法治国的过程中，推进家庭教育立法是中国政府推动社会主义法治国家建设的重要举措。不同主体在推进这一过程中扮演了关键角色： 1. 政党领导：中国共产党作为国家的领导核心，通过十九届四中全会的决策，明确要求将家庭教育立法纳入全国人大常委会的立法规划。党的领导确保了立法的方向和重点，确保立法工作与国家的整体发展战略相协调。 2. 全国人民代表大会及其常委会：全国人大代表通过提案，提出相关议案，反映了社会各界对家庭教育立法的需求。全国人大常委会将家庭教育立法纳入2020年度立法工作计划，并通过了《中华人民共和国家庭教育促进法》，体现了国家立法机关的职能和作用。 3. 政府部门：教育部、司法部等部门在立法通过后，负责贯彻部署立法精神，加强宣传普及和实践引导。他们通过各种方式支持家长履行家庭教育责任，确保法律规定能够在社会实践中得到有效执行。 4. 社会各界：社会各界，包括家长、教育工作者、专…	在家庭教育立法的过程中，不同主体的积极参与是推进全面依法治国的重要途径之一。首先，作为国家机关的全国人大代表和全国人大常委会，通过立法工作计划的规划和议案的提出，为家庭教育立法的推进提供了法律支持和政策指导。其次，教育部、司法部等部门在贯彻部署中，加强宣传普及和实践引导，为全国各地的家庭提供了相关法律知识和指导，帮助家长履行家庭教育责任。此外，专家座谈会等形式也为各方意见的广泛听取提供了平台，促进了各界对家庭教育立法的共识形成。 通过以上分析可见，不同主体在家庭教育立法中发挥了各自的作用，共同推动了全面依法治国的进程。只有各方共同努力，才能实现法律规定的有效落实，让法律成为社会生活的有力保障，从而促进国家和民族的进步和发展。 。	a	a	a	a	stud_a	a
材料二 煤炭是重要的基础性能源，对经济社会发展、居民生活有重要影响。国家统计局2021年10月公布数据显示,受国际输入性因素叠加国内煤炭价格上涨影响,煤炭加工业价格上涨12.8%,合计影响PPI (PPI指生产价格指数)上涨约0.74个百分点。61家电力上市公司的财报信息发现,各大电力上市企业整体盈利情况不如去年同期。同时,今年冬天寒潮提前来袭，部分地区比以往提前了半个月时间进行供暖，对煤炭的需求暴增。	结合材料二，运用“价格变动影响”的知识，分析煤炭价格上涨会带来哪些影响？	价格变动影响消费。煤炭价格上涨，居民会减少煤炭的使用；但使用煤电的居民生活成本增加，居民负担加重。价格变动调节生产。煤炭价格上涨，煤企利润增加，扩大产能，增加产量。影响相关产品价格。煤炭作为资源类产品，其价格上涨导致下游企业生产成本增加，影响下游企业利润空间。价格变动调节生产要素的投入。煤炭价格上涨，相关企业减少煤炭的使用，增加替代能源的投入，助推能源结构调整。	煤炭价格上涨会对社会经济造成多方面影响。首先，它会减少政府财政收入，从而减缓经济发展速度。其次，煤炭价格上涨会导致居民对煤炭及其互补品电力的价格上涨，降低了民众的生活水平，不利于经济的发展。此外，煤炭价格上涨还会导致发电企业减少火力发电以减少亏损，导致电力供应不足，进而导致电价上涨。最后，生产企业由于煤炭及其互补品的投入减少，生产成本上升，导致商品供给减少，物价上升。因此，煤炭价格上涨会对经济发展和生活水平产生负面影响。	煤炭价格上涨会导致煤炭的加工业价也在增长，同时消费减少，这不利于部分居民的煤炭消费。另外，对煤的需求增加、价格上涨也会影响电力公司的发展。然而，价格上涨也有利于煤炭企业增加经济收入。	a	a	结合材料二，煤炭价格上涨会带来以下影响： 1. **生产成本上升**：煤炭是许多工业生产过程中的重要原料，价格上涨会直接增加企业的生产成本。例如，钢铁、化工、建材等行业的生产成本会因为煤炭价格上涨而增加，从而影响这些行业的产品价格和竞争力。 2. **通货膨胀压力增大**：煤炭价格上涨会推动生产价格指数（PPI）上升，进而可能引发消费者价格指数（CPI）上升，增加通货膨胀的压力。通货膨胀会影响居民的购买力，降低生活质量。 3. **企业盈利能力下降**：如材料二所述，电力上市公司的财报显示，煤炭价格上涨导致企业盈利能力下降。煤炭是电力生产的主要燃料，价格上涨会增加电力生产成本，降低企业的盈利空间。 4. **供暖需求增加**：提前寒潮的来袭导致部分地区提前供暖，这会导致煤炭的需求增加。虽然短期内可能对煤炭价格有支撑作用，但长期来看，可能会导致煤炭库存的快速流失，进而可能引发价格波动。 5…	煤炭价格上涨会带来以下影响： 1. 生产成本上升：煤炭价格上涨将导致能源成本上升，影响到煤炭加工业的生产成本，进而影响到相关产业的生产成本。这可能会导致企业利润下降，甚至出现亏损情况。 2. 通胀压力增加：由于煤炭价格上涨影响到了PPI，进而影响到了整体物价水平。如果煤炭价格一直处于上涨状态，可能会加大通货膨胀的压力，对居民生活造成影响。 3. 能源供应问题：随着煤炭价格上涨，一些企业可能会寻求替代能源，或者尝试提高能源利用效率，从而可能对煤炭需求产生影响。另外，煤炭价格上涨也可能导致一些地区的能源供应紧张，特别是在寒冷季节需要大量煤炭进行供暖的情况下。 总的来说，煤炭价格上涨会给经济社会带来一系列的影响，包括生产成本上升、通胀压力增加、能源供应问题等。需要政府和企业根据实际情况采取相应措施来缓解这些影响。 。	a	b	b	a	model_a	b
材料- 习近平总书记指出:“我们既要绿水青山,也要金山银山。宁要绿水青山,不要金山银山,而且绿水青山就是金山银山。但监测显示,在北京、上海、广州这样的大城市里,使用空调、排放汽车尾气等已成为PM2.5的重要来源。应对pm2,5对每个人来说都是压力和责任。材料二 微博上流传着一个段子：一部高档手机，70%的功能都是没用的；一款高档轿车，70%的速度都是多余的;一幢高档别墅,70%的房间都是空闲的。低配置生活,越来越成为年轻人的生活态度。	运用经济生活的有关知识,谈谈个人应该树立什么样的消费观。	消费者要树立正确的消费观，做理智的消费者；坚持量入为出，适度消费；避免盲从，理性消费；保护环境，绿色消费；勤俭节约，艰苦奋斗。	个人应该树立量入为出，适度消费的消费观。不要盲目购买不必要的物品，避免乱消费。同时，要理性消费，不盲从大众潮流。保护环境也是重要的，提倡绿色消费，如使用布袋代替塑料袋。勤俭节约，艰苦奋斗，节约并不是限制，而是一种正确的消费观念。	个人应该树立量入为出，适度消费的消费观。要在自身的消费能力范围内进行消费，既不应该超出限度，也不应该太过低估自己的消费能力。此外，要理性消费，根据自身的需求购买商品，避免攀比消费或冲动消费，应该在理性思考后再做出购买决定。保护环境，实行绿色消费也是重要的，要在生活中践行可持续发展理念，低碳生活，保护环境，最大化商品价值，认真进行垃圾分类。此外，勤俭节约，艰苦奋斗也是必要的，要继承节俭奋斗的优良传统，不奢侈浪费，不放纵消费，而是在绿色健康的方面进行消费，传承中华民族的传统美德。	tie	tie	在当今社会，个人消费观的树立对于经济的可持续发展和环境保护至关重要。习近平总书记的指示强调了“绿水青山就是金山银山”的理念，意味着我们应该重视环境保护和可持续发展。因此，个人在消费时应该树立以下几种理念： 1. **合理消费**：消费应该符合个人实际需要，避免过度消费和浪费。例如，选择适合自己生活方式的家电产品，避免购买不必要的高端产品，只为追求品牌或功能。 2. **节能减排**：在日常生活中，减少使用高能耗的电器和设备，例如减少使用空调的时间，选择节能型家电，使用公共交通工具或骑自行车代替私家车出行，以减少PM2.5的排放。 3. **环保意识**：在消费时考虑产品的环保性能，选择环保材料制成的产品，减少一次性塑料的使用，支持可持续发展的品牌和产品。 4. **低配置生活**：如微博上流传的段子所示，低配置生活并不意味着生活质量低下，而是指合理安排生活，避免过度消费。例如，选择适合自…	个人应该树立理性消费观。在当今社会，消费已经成为人们生活中不可或缺的一部分，但是过度消费会导致资源浪费和环境污染。因此，个人在消费时应该根据自身需求和经济能力进行合理选择，避免盲目跟风消费和奢侈消费。可以通过精打细算、理性消费和追求实用性等方式来树立正确的消费观。同时，也应该注重保护环境，选择环保产品，减少资源消耗，为可持续发展贡献自己的力量。 举例来说，个人可以选择购买功能齐全但不一定是最高档的手机，避免购买过度功能的产品；可以选择乘坐公共交通工具或骑自行车来减少汽车尾气排放；可以选择共享经济中的产品和服务，如共享单车、共享汽车等，减少资源浪费。 总的来说，个人应该注重实用性和环保性，树立理性消费观，从而在个人消费的同时也为社会和环境做出积极贡献。 。	b	a	a	b	stud_a	a
新冠肺炎疫情是百年来全球发生的最严重的传染病大流行，是新中国成立以来我国遭遇的传播速度最快、感染范围最广、防控难度最大的重大公共卫生事件。为了保护人民生命安全,我国迅速打响疫情防控的人民战争、总体战、阻击战,用3个月左右的时间取得武汉保卫战、湖北保卫战的决定性成果,进而又接连打了黑龙江、北京、河北等几场局部地区聚集性疫情歼灭战,最终夺取了全国抗疫斗争重大战略成果。在中国共产党人波澜壮阔的斗争史中,这场抗疫斗争,无疑是最为感人、最为精彩的篇章之一,中华民族和中国人民众志成城、敢于斗争,铸就了生命至上、举国同心、舍生忘死、尊重科学、命运与共的伟大抗疫精神。在这次抗疫斗争中，14亿中国人民铸就起团结一心、众志成城的强大精神防线。中国人民所具有的不屈不挠的意志力，是战胜前进道路上一切艰难险阻的力量源泉，充分展示了中国精神、中国力量、中国担当。	结合材料,从中华民族精神的角度,分析在抗疫战争中中国人民为什么能够铸就团结一心、众志成城的强大精神防线。	中国人民具有伟大的奋斗精神、伟大的团结精神，疫情期间，我国人民弘扬中华民族精神，凝聚和动员了强大的抗疫力量。爱国主义是中华民族精神的核心，在抗击疫情的过程中，各族人民风雨同舟、自强不息，高举爱国主义旗帜，铸就起团结一心、众志成城的强大精神防线。我国人民弘扬中华民族精神，全力抗击疫情，为中华民族精神增添新的时代内容。	在抗疫战争中，中国人民能够铸就团结一心、众志成城的强大精神防线，首先是因为中华民族精神作为一种文化，能够指导人们的生活和价值取向。其中蕴含的伟大团结精神激励着人们团结一心，共同抗击疫情。抗疫精神作为民族精神的具体表现，在这一时代得到了充分体现，推动了人们团结一心、众志成城，共同抗击疫情。 中华民族精神是中华民族的精神火炬和支柱，植根于中华优秀传统文化，并融合了革命精神和社会主义文化。正是这种精神的引领，使得中华民族形成了团结的美德，共同构筑起强大的精神防线。因此，在抗疫战争中，中国人民能够团结一心、众志成城，正是因为有着中华民族精神的支持和指引。	在抗疫战争中，中国人民能够铸就团结一心、众志成城的强大精神防线，根源于中华民族精神的强大凝聚力。中华民族精神作为民族文化的核心，是历史长期积淀和发展的产物，始终是中华各族人民共同生活的精神纽带。这种精神支柱，不仅支持着中华儿女在困难时刻奋斗，也是推动发展的强大动力。几千年来，中华民族团结一致、战胜一切困难的伟大团结精神，是民族之魂。以爱国义义为核心的民族精神，以改革创新为核心的时代精神，在抗疫战争中凝聚成一股强大力量，让中国人民在困境中共同奋斗，共同战胜疫情。	b	b	在抗疫战争中，中国人民能够铸就团结一心、众志成城的强大精神防线，这是中华民族精神的体现，主要体现在以下几个方面： 1. **生命至上**：中华民族传统的价值观强调生命的重要性。在面对新冠肺炎疫情的威胁时，中国人民深刻认识到每一条生命的宝贵，积极采取措施保护自己和他人的生命安全。这种生命至上的精神促使人们在疫情防控中保持高度警觉和合作。 2. **举国同心**：中国共产党领导下的中国社会强调国家的统一和人民的团结。在抗疫斗争中，政府和社会各界紧密合作，形成了一个强大的团结一心的力量。从政府的政策制定到民众的自我隔离，每个人都在为共同的目标而努力。 3. **舍生忘死**：中华民族在历史上多次证明了在面对民族危机时能够舍生忘死的勇气。在抗疫斗争中，尽管面临巨大的困难和挑战，中国人民仍然坚持不懈，勇敢地面对疫情，甚至有很多医护人员和志愿者在前线冒着生命危险为人民服务。 4. **尊重科学**：…	在抗疫战争中，中国人民能够铸就团结一心、众志成城的强大精神防线，主要得益于中华民族传统文化中蕴含的团结合作、顽强拼搏的精神。中华民族历来重视集体利益高于个人利益，注重团结协作，这种传统文化使得中国人民在面临疫情时能够积极响应政府的号召，齐心协力抗击疫情。同时，中华民族在长期历史中形成了顽强拼搏、不屈不挠的品质，这种精神在抗疫战争中得到了充分展现。中国人民在疫情期间无私奉献、舍小家、顾大家的行为体现了中华民族传统美德，彰显了中国人民团结一心的强大力量。 举例来说，在武汉封城期间，许多医护人员、志愿者和普通市民不顾个人安危，奋战在抗疫一线，展现了众志成城的团结精神。他们用实际行动践行着“舍生忘死、尊重科学”的抗疫理念，为抗击疫情贡献了自己的力量。 总的来说，中国人民能够在抗疫战争中铸就团结一心、众志成城的强大精神防线，既受益于中华民族传统文化的影响，也得益于中国人民自身的顽强拼搏精神。这种精…	b	a	a	b	stud_a	a
2021年6月29日,“七一勋章”颁授仪式在人民大会堂隆重举行。习近平总书记为“七一勋章”获得者颁授勋章并发表重要讲话。习近平指出，在他们身上生动体现了中国共产党人坚定信念、践行宗旨、拼搏奉献、廉洁奉公的高尚品质和崇高精神。“七一勋章”获得者都来自人民、植根人民，是立足本职、默默奉献的平凡英雄。他们的事迹可学可做，他们的精神可追可及。他们用行动证明，只要坚定理想信念、坚定奋斗意志、坚定恒心韧劲，平常时候看得出来、关键时刻站得出来、危难关头豁得出来,每名党员都能够在民族复兴的伟业中为党和人民建功立业!要大力宣传“七一勋章”获得者的感人事迹和崇高品德,在全党全社会形成崇尚先进、见贤思齐的浓厚氛围,激励广大党员、干部牢记党的性质宗旨,牢记党的初心使命,不懈奋斗,永远奋斗,在全面建设社会主义现代化国家新征程上,向着第二个百年奋斗目标、向着中华民族伟大复兴的中国梦奋勇前进！	结合材料,说明大力宣传“七一勋章”获得者的感人事迹对于推动文化强国建设的意义。	有利于发展社会主义先进文化，弘扬主旋律，传播正能量；有利于引导群众积极践行社会主义核心价值观，为建设文化强国凝魂聚力；有利于加强理想信念教育，提高人民群众的道德修养和科学文化修养；有利于增强文化自信，为国家和民族的振兴提供更基本、更深沉、更持久的力量。	的宗旨之一。通过大力宣传“七一勋章”获得者的感人事迹，可以激励广大人民群众向他们学习，传播社会主义核心价值观，弘扬正能量，推动文化强国建设。这些勇于创新、服务人民、奉献社会的楷模们，体现了社会主义核心价值观的实践力量，为社会树立了榜样。他们的事迹将成为人们心中的一盏明灯，引领我们奋勇向前，努力实现中华民族伟大复兴的中国梦。因此，大力宣传“七一勋章”获得者的感人事迹对于推动文化强国建设具有重要意义，可以激发全社会的正能量，促进社会主义核心价值观的传播和弘扬，推动社会主义文化事业的繁荣发展。	大力宣传“七一勋章”获得者的感人事迹对推动文化强国建设具有重要意义。这些获得者身上展现了中国共产党人民的高尚品质和崇高精神，有利于走中国特色社会主义文化发展道路。通过宣传他们的事迹，可以激励每名党员在民族复兴的伟业中为党和人民建功立业，推动社会主义文化繁荣发展。同时，宣传“七一勋章”获得者的感人事迹有助于将意识形态领导权牢牢掌握在手中，坚持正确的舆论导向，使人们学习他们的做法，追随他们的精神，进一步深入贯彻学习习近平新时代中国特色社会主义思想，努力实现中国梦的伟大目标。	a	a	大力宣传“七一勋章”获得者的感人事迹对于推动文化强国建设具有重要意义。首先，这些获得者的事迹不仅仅是对他们个人奉献的肯定，更是对中国共产党人坚定信念、践行宗旨、拼搏奉献、廉洁奉公的高尚品质和崇高精神的展现。通过宣传这些感人事迹，可以在全党全社会中形成崇尚先进、见贤思齐的浓厚氛围，激励广大党员和干部牢记党的性质宗旨，坚定理想信念，奋斗不懈。 其次，宣传“七一勋章”获得者的感人事迹有助于培养和弘扬中华优秀传统文化，传递正能量，引导人民群众树立正确的价值观和世界观。这些事迹往往包含着对国家、社会和人民的深厚情感，以及对理想信念的坚定追求，这些都是文化强国建设所需要的精神支柱。 再者，通过宣传这些感人事迹，可以提高公民的文化素养，增强社会的凝聚力和向心力。人们通过学习这些先进人物的榜样，能够更好地理解和践行社会主义核心价值观，从而在精神上得到充实和提升。 最后，宣传“七一勋章”获得者的感人事迹还…	大力宣传“七一勋章”获得者的感人事迹对于推动文化强国建设有着重要的意义。通过宣传他们的事迹和崇高品德，可以激励广大党员、干部铭记初心使命，坚定理想信念，勇于担当，以更加坚定的决心投身到社会主义现代化国家建设中。这样的宣传可以带动全党全社会形成崇尚先进、见贤思齐的浓厚氛围，促进社会主义核心价值观的传播和践行。同时，通过宣传“七一勋章”获得者的感人事迹，可以将正能量传递给更多的人，激发人们的责任感和使命感，推动社会主义核心价值观在全社会的深入传播，为构建社会主义核心价值观引领下的文化强国奠定坚实基础。	a	b	a	a	model_a	a
2021年11月7日，是新华通讯社成立 90 周年。新华通讯社，简称新华社，是中国国家通讯社和世界性通讯社。新华社的前身是 1931 年 11 月 7日在江西瑞金成立的红色中华通讯社（简称红中社），为党团结带领全国各族人民取得革命、建设和改革的重大胜利作出了重要贡献。中国邮政曾发行新华通讯社建社纪念邮票一套4枚。图名分别为:红色电波、抗战号角、解放战鼓、走向世界,对应了中国共产党自成立以来,充满着苦难与辉煌、曲折与胜利的不平凡历程。	结合材料,运用历史和人民的选择的有关知识,谈谈中国共产党自成立以来对中华民族和中国人民作出了哪些伟大的贡献。	材料中的四枚邮票体现了中国共产党团结带领全国各族人民为争取民族独立、人民解放和实现国家富强、人民幸福而不懈奋斗的光辉历程。中国共产党领导中国各族人民推翻三座大山，取得了新民主主义革命的伟大胜利，建立了新中国。中国共产党作出了改革开放的伟大决策，极大地解放和发展了社会生产力，使人民生活显著改善，综合国力显著增强，国际地位显著提高。中国共产党团结带领全国人民，推动中国特色社会主义进入新时代，取得了决胜全面建成小康社会的胜利，开启了全面建设社会主义现代化强国的新征程。	中国共产党自成立以来对中华民族和中国人民作出了许多伟大的贡献。首先，共产党团结带领全国各族人民取得了革命、建设和改革的重大胜利，成立了中华人民共和国，使人民真正成为国家的主人。其次，共产党作为中华人民的主心骨，为中国的反帝反封建战争提供了思想指导，带领全国各族人民为实现中华民族的伟大复兴而不断奋斗。共产党还使我国国际地位提高，人民生活水平提高，综合国力增强。此外，共产党结束了多数人压迫少数人的历史，团结了中国人民的思想，带领人民走向新时代的历史方位，为解决人类问题作出了贡献。可以说，中国共产党的伟大贡献是中国历史上不可磨灭的光辉篇章。	自成立以来，中国共产党始终把工人阶级的利益放在首位，作为中华民族和中国人民的先锋队，为国家的发展进步作出了重要贡献。通过提出改革开放政策，党领导人民实现了人民生活水平的提高和国家综合国力的增强，使中国走上了新时代的发展道路。这一伟大飞跃，让中国实现了从站起来、富起来到强起来的历史跨越，展现了中国共产党作为中华民族和中国人民的先锋队的伟大作用。	b	b	中国共产党自成立以来，对中华民族和中国人民作出了许多伟大的贡献。首先，中国共产党领导中国人民进行了长期的抗日战争和解放战争，成功地推翻了封建帝制，建立了中华人民共和国，结束了长期的内忧外患和半殖民地半封建的状态，为中华民族的独立、自由和解放奠定了基础。 其次，中国共产党推行了一系列的改革开放政策，引导中国从一个闭关自守的社会主义国家转变为开放向外的社会主义现代化国家。改革开放不仅促进了中国经济的飞速发展，也使中国成为世界第二大经济体，为中国人民带来了更加富裕的生活。 再者，中国共产党坚持以人民为中心的发展思想，推动了社会主义现代化建设，提高了人民的生活水平，实现了从贫穷落后的国家到世界第二大经济体的巨大飞跃。同时，中国共产党还在国际上发挥了重要作用，推动了全球治理体系的改革和创新，特别是在应对全球性挑战如气候变化、公共卫生等方面做出了积极贡献。 最后，中国共产党还注重文化自信和传统文化的…	中国共产党自成立以来对中华民族和中国人民作出了许多伟大的贡献。首先，中国共产党领导人民进行了长期艰苦的革命斗争，最终取得了新中国的成立，实现了中国人民解放和民族独立。其次，中国共产党在新中国成立后，带领全国人民进行了社会主义建设和改革开放，取得了举世瞩目的成就。此外，中国共产党努力实现了国家富强、民族振兴、人民幸福的宏伟目标，为实现中华民族的伟大复兴而不懈奋斗。总的来说，中国共产党在中国近代史上扮演了重要的历史角色，为中华民族和中国人民作出了不可磨灭的贡献。	b	b	b	b	model_a	b
2021 年 12 月 14日，人民日报用 4 个整版推出“奋斗百年路启航新征程”辽宁篇，关注辽宁立足新发展阶段、贯彻新发展理念、构建新发展格局、推动高质量发展，夯实党建根基，全面振兴发展的新局面。文章指出:习近平总书记多次就辽宁振兴发展作出重要指示,为辽宁振兴发展取得新突破明确方向、指明路径。辽宁省委深入学习贯彻习近平总书记重要讲话和重要指示精神,提出坚持把法治环境、信用环境建设作为解决辽宁营商环境问题的突出任务,加快推进法治政府建设,健全完善社会信用制度体系,建立失信联合惩戒机制,严厉打击违法失信行为,加大知识产权保护力度,积极营造公平有序的市场环境,不断提升社会治理法治化水平;坚持以人民为中心的发展思想,把高质量发展同满足人民美好生活需要紧密结合起来,用情用力办好民生实事，在推动高质量发展过程中让群众享受高品质生活；坚持就业优先，扩大就业容量,提升就业质量,多渠道增加居民收入来源;…	结合材料，运用党的执政方式的知识，分析辽宁省委是如何带领全省人民建设美丽辽宁的。	辽宁省委提出，坚持把法治环境作为解决辽宁营商环境问题的突出任务，加快推进法治政府建设，严厉打击违法失信行为等，体现了党坚持依法执政。辽宁省委提出，坚持以人民为中心的发展思想，把高质量发展同满足人民美好生活需要紧密结合起来，坚持就业优先等，体现了党坚持民主执政。辽宁省委提出，深入打好污染防治攻坚战，建设人与自然和谐共生的美丽辽宁，尊重了社会主义建设规律，体现了党坚持科学执政。	辽宁省委通过严格管党治党，要求党员干部务实清廉，创造了一个真实清正廉洁的政治环境。同时，党委以人民为中心，始终坚持全心全意为人民服务的宗旨，关注人民群众的需求和利益，努力改善人民生活。在经济建设方面，党委坚持就业优先，通过扩大就业容量、提升就业质量，为人民群众创造更多的就业机会，推动经济发展。此外，党委还积极践行习近平总书记提出的“绿水青山就是金山银山”自然理念，注重生态环境保护和可持续发展，努力打造美丽的环境和繁荣的经济，实现经济社会双丰收。通过这些举措，辽宁省委带领全省人民建设美丽辽宁，实现经济社会的全面发展。	辽宁省委深入学习贯彻习近平总书记的重要讲话、重要指示精神，充分发挥了党的思想领导，体现了党的执政方式的有效运用。辽宁省将法治环境、社会信用建设作为突出任务，全面依法执政，促进社会公平正义，坚持以人民为中心的发展思想，实现清廉执政，巩固了党的执政地位。同时，辽宁省坚持就业优先，体现了为民执政的宗旨，做好环境保护，推动绿色发展，实现科学执政。通过充分发挥科学执政、民主执政、依法执政的作用，辽宁省带领全省人民建设美丽辽宁取得了显著成效。	a	a	辽宁省委在带领全省人民建设美丽辽宁的过程中，采取了一系列措施和策略，体现了党的执政方式的特点和要求。首先，辽宁省委深入学习贯彻习近平总书记的重要讲话和指示精神，确保了政策的正确性和方向性。通过学习和贯彻这些精神，省委能够及时调整和优化工作重点，确保各项政策与时俱进，符合新发展阶段的要求。 其次，辽宁省委坚持把法治环境和信用环境建设作为解决营商环境问题的突出任务。这体现了党的执政方式中的法治化原则，即通过建立健全的法律法规体系，营造公平、公正的市场环境，保障各方参与者的合法权益。通过加快推进法治政府建设，省委旨在提高政府治理能力，确保决策的透明度和执行力度。 再次，省委提出实施城市更新行动，提升城市发展质量，这体现了党的执政方式中的发展观念，即以人民为中心，推动高质量发展。通过城市更新，省委旨在改善城市环境，提升城市功能，满足人民群众的美好生活需要。 此外，省委还深入打好污染防治攻坚战，推…	辽宁省委通过深入学习贯彻习近平总书记的重要指示精神，提出了一系列关于建设美丽辽宁的具体措施和方向。首先，坚持把法治环境、信用环境建设作为解决营商环境问题的突出任务，加快推进法治政府建设，健全完善社会信用制度体系，严厉打击违法失信行为，提升社会治理法治化水平。这些措施有助于营造公平有序的市场环境，为高质量发展提供有力支撑。其次，坚持以人民为中心的发展思想，将高质量发展与满足人民美好生活需要结合起来，办好民生实事，让群众享受高品质生活。这体现了党的执政理念中人民至上的核心思想。此外，实施城市更新行动、打好污染防治攻坚战等措施也有助于建设美丽辽宁，提升全省人民的生活质量。综上所述，辽宁省委通过制定一系列具体措施和方向，积极引导全省人民建设美丽辽宁，实现了党的执政方式中的以人民为中心的发展理念，并取得了一定成效。 。	b	a	a	b	stud_a	a
内蒙古额济纳旗，因金色胡杨而闻名。新冠肺炎疫情发生后，万余名共产党员如坚韧的胡杨般奋战在抗疫一线，在战疫斗疾中筑起钢墙铁壁。疫情发生以来，额济纳旗的党员们毫不犹豫地投入到疫情防控中。随着确诊病例快速上升，大批党员还从内蒙古各地和外省赶来支援。在额济纳旗 11 万平方公里的土地上，一面面党旗飘扬在社区防控、核酸检测、流调溯源、患者救治等防疫工作一线，一名名党员临危不乱，打头阵、挑大梁，努力为滞留旅客排忧解难，为地方百姓生命安全保驾护航。2021 年10月27日开始，滞留在额济纳旗的游客返程。一位抗疫党员说：“作为党员，再苦再累都无所谓，只要能让大家安全顺利返程。”站台上，看着游客们高兴地朝她挥手告别，她觉得10多天的付出十分值得。2021 年11月2日，内蒙古自治区阿拉善盟新冠肺炎防控工作指挥部表示，额济纳旗发生的疫情，扩散外溢风险已经有效管控，疫情防控已经从社区防控阶段进入攻坚清零新阶段。	结合材料,运用中国共产党的领导的知识,说明额济纳旗疫情防控能够进入到攻坚清零新阶段的原因。	中国特色社会主义制度的最大优势是中国共产党的领导，阿拉善盟坚持党对抗疫斗争的集中统一领导，发挥了党总揽全局、协调各方的领导核心作用。额济纳旗的党员们在疫情防控攻坚战中践行党全心全意为人民服务的宗旨和立党为公、执政为民的执政理念，坚持人民立场，努力为滞留旅客排忧解难，为地方百姓生命安全保驾护航，充分发挥各级党组织的战斗堡垒作用。额济纳旗的党员们临危不乱，打头阵、挑大梁，发挥了共产党员的先锋模范作用。	额济纳旗疫情防控能够进入到攻坚清零新阶段的原因在于以下几点：首先，中国共产党员一直秉持全心全意为人民服务的宗旨，在抗疫战斗中发挥着先锋模范作用，始终与人民群众同呼吸共命运；其次，党员们始终牢记维护人民利益的使命，真正做到了利益为民所谋，权力为民所用，情感与人民血肉相连；第三，党在抗疫过程中充分发挥了协调各方、总揽全局的作用，形成了一方有难、八方支援的良好局面；第四，中国共产党员始终保持着初心和使命，坚定理想信念，谦虚谨慎、不骄不躁、艰苦奋斗；最后，抗疫工作始终坚持党的领导，这为额济纳旗疫情防控工作的进展提供了坚强保障。	额济纳旗疫情防控能够进入到攻坚清零新阶段的原因，在于中国共产党的领导。中国共产党以全心全意为人民服务为行动演旨，以人民立场为党的主要立场。在疫情防控工作中，党始终把人民群众的生命安全和身体健康放在首位，全力保障人民群众的健康和安全。 同时，中国共产党以广大人民群众向往的美好生活为行动目标，勇于放弃个人利益。党员干部积极响应号召，无私奉献，为了人民群众的健康而不辞辛劳，坚决执行防控措施，努力为疫情防控工作取得胜利而努力奋斗。 中国共产党把人民利益放在首位，将人民的利益放在心中最为重要的位置。党的领导机关和干部们始终以人民的利益为重，全力做好疫情防控工作，积极投入到攻坚清零的工作中去。他们愿意挑起大梁，急主动打好头阵，为保障人民群众的生命安全和身体健康而不懈努力。 因此，正是在中国共产党的坚强领导下，额济纳旗疫情防控工作能够进入到攻坚清零新阶段，取得了阶段性胜利。党的领导为人民群众的健康和安…	b	b	额济纳旗疫情防控能够进入到攻坚清零新阶段的原因在于中国共产党的坚强领导和党员的不懈努力。面对疫情的挑战，万余名共产党员如同坚韧的胡杨树，勇敢地站出来，积极投入到疫情防控工作中。他们在社区防控、核酸检测、流调溯源、患者救治等关键岗位上发挥着重要作用，确保了疫情防控的各项措施得到有效执行。 中国共产党的领导确保了疫情防控工作的统一指挥和协调一致。党的领导下，各级政府和相关部门能够迅速响应疫情，采取果断措施，有效控制疫情的扩散。同时，党员的先锋模范作用激励了广大人民群众积极参与到疫情防控中来，形成了全社会共同抗疫的良好氛围。 此外，党员们的奉献精神和无私奉献的行为也极大地鼓舞了大家的士气。他们在疫情防控中展现出的坚韧不拔、无私奉献的精神，体现了中国共产党员的高尚品质和崇高责任感。正是这种精神和行动，帮助额济纳旗在疫情防控中取得了显著成效，成功地将疫情防控从社区防控阶段推进到了攻坚清零新阶段。	额济纳旗疫情防控能够进入到攻坚清零新阶段的原因在于中国共产党的坚强领导。作为中国共产党员，他们以党的领导为准则，积极响应号召，勇于担当，不畏艰险，全力以赴投入到疫情防控工作中。他们组织协调各方力量，制定科学合理的防控方案，统一指挥协调各个环节的工作，确保疫情防控工作的有序进行。此外，中国共产党的组织力量和群众基础也为额济纳旗疫情防控提供了坚实的基础，使得全体党员和群众能够团结一心，共同抗击疫情，最终取得了阶段性胜利。中国共产党的领导作用和号召力使得额济纳旗疫情防控工作得以高效推进，最终实现了攻坚清零的目标。 。	a	b	b	a	model_a	b
2022 年是红军长征胜利 86周年。红军长征是一部气壮山河的英雄史诗，也是一场播撒革命火种之旅。1934 年 12 月初，在苗族地区停留期间，红军各部队反复向苗族群众宣传：“我们是共产党领导的红军,是工人农民及各族人民自己的队伍,绝不乱拿老百姓的一针一线。”红军干部战士严格尊重少数民族的风俗习惯,在进入少数民族地区之前,严格执行“三大纪律八项注意”,一些少数民族青年在党的感召下,毅然参加了红军,壮大了革命队伍。红军也很注意团结回民同胞,1936年5月,红二十五军长征至甘肃等地时,不仅对回民群众秋毫无犯,而且还帮助他们扫院、担水、治病。一位回族老人看到红军的所作所为,十分感动地说:“我活了这么大年纪,还是头一回见到这样的仁义之师!”	结合材料，运用中国共产党的领导的知识，谈谈你对“党和红军是仁义之师”的理解。	中国共产党一经成立，就把为中国人民谋幸福、为中华民族谋复兴确立为自己的初心使命。党和红军处处为人民群众的利益着想，得到了包括少数民族在内的广大人民群众的拥护和支持。党始终坚持全心全意为人民服务。提倡各民族平等，尊重少数民族的风俗习惯，为少数民族老百姓办实事。加强和改进党的建设，不拿群众的一针一线，严格执行“三大纪律八项注意”。中国共产党团结带领全国各族人民抗战，少数民族青年毅然参加红军，壮大了革命队伍的力量，推动了中国革命胜利的进程。	我对“党和红军是仁义之师”的理解是，中国共产党始终将人民群众的利益放在首位，没有自己的特殊利益，始终坚持全心全意为人民服务的宗旨。在进入少数民族地区时，严格执行“三大纪律八项注意”，体现了党始终牢记初心使命，保持先进性和纯洁性。党员发挥先锋模范作用，为人民扫地、担水，始终践行全心全意为人民服务的宗旨。党始终坚持以人民为中心的发展思想，坚持人民的历史主体地位，党的领导是中国特色社会主义的本质特征，也是中国特色社会主义制度的最大优势。因此，党和红军都是仁义之师，以崇高的理想信念和为人民利益的坚定执着，成为了人民的主心骨和保护神。	。③红军则是中国共产党的战斗队伍，始终听党指挥、服务人民、保家卫国。④党和红军始终紧密相连，共同为实现人民利益而奋斗。⑤因此，“党和红军是仁义之师”，体现了他们对人民的忠诚、热爱，以及为人民利益不惜牺牲的精神。⑥他们是人民的坚强后盾，始终站在人民一边，为人民谋幸福、谋未来。	a	a	在中国共产党的领导下，红军长征不仅是一场军事上的伟大胜利，更是一次深刻的民族团结和革命传播的过程。红军在长征途中，特别是在进入少数民族地区时，展现了高度的政治觉悟和文化敏感性。他们严格遵守“三大纪律八项注意”，尊重和保护了各族人民的利益，赢得了广泛的群众支持和理解。 红军的这种做法体现了中国共产党领导下的“仁义之师”的精神。首先，红军坚持以人民为中心的原则，确保了革命的正当性和合法性。他们的行为证明了共产党领导下的军队不仅是为了革命的胜利，更是为了人民的利益和民族的团结。其次，红军在少数民族地区的活动，展现了共产党对民族平等、团结的坚定立场。通过与各族人民的互动和合作，红军不仅传播了革命理念，还促进了民族间的理解和交流。 例如，红军在进入苗族地区时，通过反复宣传，赢得了苗族群众的信任和支持。一些苗族青年在党的感召下加入了红军，壮大了革命队伍。这不仅体现了红军的先进性，也是中国共产党领导下…	在我看来，中国共产党领导的红军确实展现了仁义之师的形象。首先，红军在长征途中尊重少数民族的风俗习惯，并严格执行“三大纪律八项注意”，体现了他们对当地群众的尊重和关爱。其次，红军在与回民同胞接触时，不仅保持了良好的关系，还积极帮助他们解决生活中的困难，展现了他们的仁义之心。总的来说，党和红军作为革命队伍，始终秉持着为人民服务的宗旨，关心群众利益，尊重民族风俗，展现了高尚的品德和精神风貌。 。	a	b	a	a	model_a	a
2022 年是红军长征胜利 86周年。红军长征是一部气壮山河的英雄史诗，也是一场播撒革命火种之旅。1934 年 12 月初，在苗族地区停留期间，红军各部队反复向苗族群众宣传：“我们是共产党领导的红军,是工人农民及各族人民自己的队伍,绝不乱拿老百姓的一针一线。”红军干部战士严格尊重少数民族的风俗习惯,在进入少数民族地区之前,严格执行“三大纪律八项注意”,一些少数民族青年在党的感召下,毅然参加了红军,壮大了革命队伍。红军也很注意团结回民同胞,1936年5月,红二十五军长征至甘肃等地时,不仅对回民群众秋毫无犯,而且还帮助他们扫院、担水、治病。一位回族老人看到红军的所作所为,十分感动地说:“我活了这么大年纪,还是头一回见到这样的仁义之师!”	请你为纪念红军长征 86 周年写两条宣传标语。	传承长征魂、走好新长征、实现中国梦；重温党的伟大成就、回顾党的历史经验、感悟党的伟大精神；长征壮举万世瞩目，红军精神光耀千秋。	1. 跨越雪山、穿越江河，初心不忘，民族幸福。 2. 以人民幸福为中心目标，永不改变。	1. 红军长征86周年，弘扬红色精神。 2. 时光荏苒，弥足珍贵，缅怀红军长征，传承奋斗精神。	b	b	1. "同心协力，共创辉煌：纪念红军长征胜利86周年，传承革命精神，推动民族团结进步！" 2. "英雄长征，火种播撒：红军精神永燃，民族大团结，共筑中国梦！	1. 红军长征，永远记忆！共产党领导，群众支持！ 2. 团结友爱，仁义之师！红军精神，永流传！ 。	a	b	tie	a	model_a	tie
十九大报告指出，实施乡村振兴战略要坚持农业农村优先发展，按照“产业兴旺、生态宜居、乡风文明、治理有效、生活富裕”的总要求，建立健全城乡融合发展体制机制和政策体系,加快推进农业农村现代化。加强农村基层基础工作,健全自治、法治、德治相结合的乡村治理体系。某市在实施乡村振兴战略的过程中大力推进乡村文化建设,不断充实农民群众的精神文化生活。例如,评选、宣传行业能手和劳模,积极培养各类民间艺人,调动农民群众投身新农村建设的积极性;创办各种形式的“农村书推广发家致富知识;借村委会换届选举,举办各种讲座,提高农民群众的政治参与素养,打造和谐村庄;以乡镇文化站为主体,积极开展丰富多彩的乡村文化活动,举办各种文化艺术节,让人民群众自创自乐。	结合上述材料,谈谈乡村文化在实施乡村振兴战略的过程中所发挥的作用。	文化是一种精神力量，能够在人们认识世界和改造世界的过程中转化为物质力量。推进乡村文化建设为乡村振兴战略的实施提供精神动力和智力支持。文化与经济相互影响、相互交融。推进乡村文化建设可以提高农民科技文化素质和农村科技水平，促进农村产业经济的发展，改善农民生活。文化与政治相互影响、相互交融。推进乡村文化建设可以提高农民政治素养和参与政治生活的能力，促进农村基层民主的发展和乡村治理体系的完善。文化塑造人生。推进乡村文化建设有利于促进优秀文化的传承，丰富人的精神世界，增强人的精神力量，促进人的全面发展，培养新型农民。	乡村文化在实施乡村振兴战略中发挥着重要作用。首先，文化与经济、政治相互交融，推动乡村文化的发展有利于构建现代化、民主法治、德治相结合的乡村治理体系，促进新乡村的建设。其次，文化是一种精神力量，推进乡村文化建设可以丰富农民科学文化知识，调动农民群众的积极性，推动乡村振兴发展和提升生活水平。此外，文化能够丰富人的精神生活，举办艺术节等活动可以丰富农民群众的精神世界，拓宽他们的视野，推动文化创新，打造和谐乡村。最后，文化影响人的交流方式和认识，推动乡村文化的发展有利于提高群众素质，消除封建迷信，传播科学文化，为建设和谐文明富强的新乡村提供动力，促进乡村振兴。因此，乡村文化在乡村振兴中具有不可替代的作用。	战略的实施需要依靠乡村文化作为精神支柱，激发乡村居民的自豪感和归属感，增强他们对乡土的热爱和保护意识。④乡村文化还可以传承乡土特色和传统技艺，激发乡村人才的创新创业潜力，推动乡村产业的升级和转型。⑤总的来说，乡村文化在乡村振兴战略中扮演着重要角色，是实施乡村振兴战略的重要支撑和保障。	a	a	乡村文化在实施乡村振兴战略过程中发挥着重要的作用。首先，乡村文化是乡村振兴战略的重要内容之一，它能够丰富农民群众的精神文化生活，提升他们的生活质量。通过评选和宣传行业能手和劳模，培养民间艺人，乡村文化能够增强农民群众的自豪感和归属感，激发他们参与新农村建设的热情和积极性。 其次，乡村文化是乡村治理体系和治理能力现代化的重要组成部分。通过举办讲座，提高农民群众的政治参与素养，乡村文化有助于构建和谐的村庄社会，促进乡村治理的民主化和法治化。 再者，乡村文化是推动乡村经济社会发展的重要手段。通过创办“农村书推广发家致富知识”，乡村文化能够为农民提供知识和技能，帮助他们掌握现代农业生产和经营方法，提高农业产业化水平，促进农民增收。 最后，乡村文化活动，如乡村文化艺术节，能够增强乡村文化的传承和创新，促进乡村旅游的发展，吸引外来游客，带动当地经济的增长。 总之，乡村文化在乡村振兴战略中扮演着桥梁和…	乡村文化在实施乡村振兴战略的过程中扮演了至关重要的角色。首先，乡村文化可以增强农民群众的文化自信和认同感，促进他们对乡村振兴的积极参与和支持。通过评选、宣传行业能手和劳模、培养民间艺人等活动，可以激发农民的创造力和活力，提高他们的文化素养和精神境界，从而推动乡村振兴的进程。 其次，乡村文化可以促进乡村社会的和谐发展。通过举办各种文化活动、开展各种讲座等形式，可以增强农民群众的凝聚力和向心力，促进村民之间的交流和互动，从而构建和谐的乡村社会关系，为乡村振兴提供良好的社会环境。 最后，乡村文化也可以传承和弘扬乡土文化，保护和传承乡村的传统文化遗产。通过举办各种文化艺术节、推广发扬农村书等活动，可以激发农民对自己传统文化的热爱和自豪感，保护和传承乡土文化，促进乡村文化的繁荣与发展。 总之，乡村文化在实施乡村振兴战略中发挥着不可替代的作用，为推动农村现代化、建设美丽乡村提供了重要的支撑和动力。 。	tie	a	a	tie	stud_a	a
作为庆祝中国共产党成立100周年优秀电影, 《长津湖》票房连续打破了多个记录,社会效益空前。该剧通过艺术手法以抗美援朝战争第二次战役中的长津湖战役为背景，讲述了一段波澜壮阔的历史: 71年前,中国人民志愿军赴朝作战,在极寒环境下,东线作战部队凭着钢铁意志和英勇无畏的战斗精神一路追击,奋勇杀敌,扭转了战场态势,打出了军威国威,弘扬了正确的历史观、民族观、国家观、文化观,极大地激发了观众的爱国主义热情。该剧艺术形式创新,视觉效果震撼,充分拉近了主流文化和青年的距离,让90后、00后年轻人心生“信念感”“使命感”,社交网络上形成热议。全剧没有任何说教,而是通过一个个人物的艺术描写,生活化地揭示了抗美援朝精神。主创团队高度重视剧本创作,历时3年,从亲历老战士考证、人物塑造、情节编织等方面反复打磨,完成了一部具有里程碑意义的作品。	结合材料，运用“文化传承与文化创新”的知识，谈谈《长津湖》成功播出对文化发展的启示。	立足中国特色社会主义的伟大实践。《长津湖》以长津湖战役为背景，主创团队向亲历战士考证，让电影从实践中吸取营养。继承传统，推陈出新。深入挖掘长津湖战役中的中华优秀文化和民族精神，推动中华优秀传统文化创造性转化和创新性发展。坚持以人民为中心的创作导向，满足人民群众文化需求。《长津湖》创新艺术形式，拉近与青年人的距离，为人民提供精神食粮。借助现代信息技术和大众传媒的功能，推动中华文化和民族精神在呈现形式中的创新。	《长津湖》成功播出为我们提供了关于文化发展的启示。首先，我们可以看到文化创新必须植根于中国优秀传统文化。抗美援朝中志原军展现的伟大爱国精神、奋斗精神、团结精神正是中国民族精神的体现，这些优秀传统文化的继承是文化创新的基础。其次，文化创新需要不断推动艺术形式、内容和传播手段的创新。《长津湖》在艺术形式上进行了创新，通过震撼的视觉效果和人们喜闻乐见的方式传播主流文化，拉近了青年与主流文化的距离。同时，文化创新也要结合时代精神赋予新的内涵。在复杂的国际形势中，《长津湖》让年轻观众产生了“信念感”和使命感，增强了民族凝聚力，为抗美援朝精神注入了新的活力。最后，文艺工作者应该积极承担起文化传承与创新的责任，创作出人民群众真正喜闻乐见的优秀作品。《长津湖》中的主创团队通过认真打磨剧本和考证，将抗美援朝精神生动地呈现在观众面前，创作出了具有社会效益和经济效益的优秀作品。通过这些启示，我们可以更好地认识…	《长津湖》成功播出给我们带来了许多关于文化发展的启示。首先，这部作品告诉我们文化具有深远持久的特点，可以通过潜移默化的方式影响人们的认识活动、实践活动和思维方式。通过讲述波澜壮阔的历史故事，这部电影不仅拉近了主流文化和青年的距离，还让90后、00后的年轻人心生“信念感、使命感”。其次，文化传播的重要途径是商业贸易和人口教育，而重要手段则是大众传媒。通过商业化的运作和大众传媒的宣传，可以更好地推动优秀传统文化表现形式的更新，使之得以传承和发展。因此，我们可以从《长津湖》的成功中学习，不断探索文化创新的路径，促进文化的传承和发展。	a	a	《长津湖》作为一部纪念中国共产党成立100周年优秀电影，凭借其独特的艺术手法和深刻的历史背景，成功地在文化传承与文化创新之间找到平衡点，展现了其对文化发展的积极启示。 首先，文化传承是《长津湖》的核心内容。通过对抗美援朝战争第二次战役中的长津湖战役的深入描绘，电影传承了中国人民志愿军的英勇事迹和抗美援朝精神，确保了这一重要历史时期的记忆得以传承。这种传承不仅仅是对历史的回顾，更是对民族精神和国家荣誉的传递，激发了观众的爱国主义情感。 其次，文化创新是《长津湖》取得成功的关键。电影在艺术形式上进行了创新，采用了视觉效果震撼的拍摄手法，通过生活化的个人物物描写，展现了战争的残酷与英雄的豪迈。这种创新不仅吸引了年轻观众，更使得主流文化与青年的距离得到拉近，形成了强烈的文化共鸣。 再者，《长津湖》的成功也启示我们，文化发展需要结合时代的需求和观众的兴趣。电影的主创团队在剧本创作上投入了3年的时间…	《长津湖》成功播出展示了文化传承与文化创新相结合的重要性。首先，该电影通过讲述抗美援朝战争历史事件，传承了英雄主义精神和爱国情怀，弘扬了正确的历史观、民族观、国家观、文化观。这种文化传承激发了观众的爱国主义热情，让人们对国家和民族有更深层次的认同感。与此同时，该电影采用了新颖的艺术手法和视觉效果，吸引了年轻一代观众的注意，拉近了主流文化与青年的距离。这种文化创新使得传统文化更具吸引力和影响力，为文化的传承注入了新的活力。 通过《长津湖》的成功播出，我们可以看到，文化传承与文化创新并不是割裂的，而是相辅相成的。传承传统文化是为了让人们了解历史、弘扬传统价值观，而创新则是为了让文化更具现代感、吸引力和包容性。只有在传承和创新相结合的过程中，文化才能不断发展壮大，为社会带来更多正能量和影响力。 。	tie	a	a	tie	stud_a	a
北京时间2021年10月16日0时23分，搭载神舟十三号载人飞船的长征二号F遥十三运载火箭，在酒泉卫星发射中心精准点火发射，顺利将翟志刚、王亚平、叶光富 3名航天员送入太空，发射取得圆满成功。这是我国载人航天工程立项实施以来的第 21 次飞行任务,也是空间站阶段的第2次载人飞行任务。在60多年来的航天事业发展中,在实现航天梦、中国梦的过程中,我们的航天人克服困难、勇于创造、团结协作、敢于追梦,形成宝贵的精神财富,正是这些财富引领我们航空事业的飞速发展,也使我国航天事业发展从无倒有,由弱到强,航天技术多个方面在世界处于领先水平,增强了中华民族的凝聚力和向心力和民族自豪感。	结合材料,运用中华民族精神的知识,分析发扬新时代航天精神对推进建设现代化强国的意义	中华民族精神以爱国主义为核心，新时代航天是中华民族精神的丰富和发展，弘扬新时代航天精神是培育中华民族精神的需要。新时代航天精神是激励中国人民团结奋斗的精神纽带，是支撑中华民族战胜困难、自强不息的精神支柱，是推动中华民族走向繁荣强大的精神动力，是中华民族之魂，有利于实现中华民族的伟大复兴。新时代航天精神是民族精神的具体体现，体现爱国主义精神。弘扬民族精神的意义（地位、作用）。弘扬民族精神的重要性、必要性（综合国力、竞争力、道路）。	发扬新时代航天精神，就是在弘扬中华民族精神，这是建设现代化强国的迫切需要。中华民族精神是推动中华民族克服困难、艰苦奋斗的力量，是我们的精神支柱，可以引领航天人勇于创新、团结协作，推动我国航天工业不断发展壮大，为建设现代化强国贡献力量。中华民族精神具有丰富多彩的民族特性，可以加强民族文化认同和凝聚力，保障国家文化安全，推动现代化强国建设。文化创新必须扎根于中华民族文化精神，这是我们传统优秀文化的基石，只有深深扎根于中华民族精神，我们才能不断推动现代化强国建设。	发扬新时代航天精神对推动建设现代化强国具有重要意义。航天精神是中华民族在实现航天梦、中国梦的过程中逐渐形成的，它体现了克服困难、勇于创造、团结协作、敢于追梦的精神品质。这种精神不仅体现了中华民族伟大的创造精神和团结精神，更增强了中华民族的凝聚力、向心力和民族自豪感。发扬中华民族精神是促进中华民族走向强大、繁荣的精神动力，是中华儿女共同创造祖国美好明天的力量之源，是中华民族之魂、永远的精神火炬。继承和发扬中华民族精神可以维系各民族共同生活的精神纽带，促进民族团结和社会和谐。发扬新时代航天精神，有助于激发全民族的创新创造激情，推动中国向现代化强国的目标迈进。	tie	tie	中华民族精神是指中华民族在长期的历史发展中形成的一系列宝贵的精神财富，包括勇于追梦、克服困难、团结协作和敢于创新的精神。新时代航天精神是对传统中华民族精神的继承和发展，它在中国载人航天工程的发展中得到了充分体现。 发扬新时代航天精神，对于推进建设现代化强国具有重要的意义。首先，航天事业是国家综合国力和科技实力的重要体现。通过发扬航天精神，中国能够在航天技术领域取得更多的突破和进步，提升国家的科技水平和国际地位。例如，神舟十三号任务的成功实施，不仅展示了中国航天技术的成熟和稳定，也显示了中国在载人航天领域的领先地位。 其次，航天精神的传承和发扬能够激发全民族的创新精神和创造力。航天工程的发展需要跨学科的协同创新，需要科学家、工程师、航天员等各方面人才的共同努力。通过发扬航天精神，可以激发更多人的创新热情，推动科技进步和产业升级，为国家的现代化建设提供强大的科技支撑。 再次，航天精神的传承和…	发扬新时代航天精神对推进建设现代化强国具有重要意义。首先，航天精神体现了团结协作、勇于创新、追求卓越的价值观，这些价值观在现代化建设中具有重要作用。团结协作可以促进各领域间的合作与交流，实现资源共享、优势互补，推动科技创新和产业升级。勇于创新可以激发人们的创造力和创新意识，推动科技发展，提升国家综合实力。追求卓越则可以激发人们的进取心和奋斗精神，促进个人和国家的发展进步。 另外，航天精神还体现了敢于追梦的精神，这种精神可以激励人们为实现国家现代化和强国梦而努力奋斗。航天事业的成功不仅仅是一次技术突破，更是中国精神的体现，是民族自信心和自豪感的象征，可以激励全社会积极向上、不断进取，为实现中华民族伟大复兴的中国梦而努力奋斗。 综上所述，发扬新时代航天精神对推进建设现代化强国具有重要意义，它可以激发全社会的创新意识和奋斗精神，促进国家科技创新和经济发展，增强国家的综合实力，推动实现中华民族伟…	a	b	tie	a	model_a	tie
习总书记指出，文化振兴在乡村振兴过程中起着举足轻重的作用。贵州省大力实施乡村文化振兴示范项目，保护、传承、弘扬贵州民俗文化，让传统民俗文化在乡村振兴过程中焕发生机。民俗文化是一种来自于人民、传承于人民,又深藏于人民行为、语言和心理之中的强大精神力量,具有广泛的群众认同性和深远的价值引领力。贵州各民族在长期的历史发展过程中形成了本民族特色的民俗文化,底蕴深厚,内容丰富。侗族大歌、苗族刺绣等民俗艺术享誉中外;贵州夜郎文化、安顺的屯堡文化历史悠久,毕节大方百里杜鹃祭花神、锦屏斗牛节等民间节会兴盛不衰。丰富多样的民俗文化培育了贵州各民族诚信克己、与人为善、精忠爱国等优良素质。近年来,贵州省大力支持优秀传统民俗文化传承发展,设立乡村非遗传承堂或传习所，营造文明乡风和良好家风。充分发掘贵州民俗文化的思想内涵、价值理念、道德意蕴,凝聚民族情感,增进民族文化自信,赋能乡村振兴	结合材料,运用发展中国特色社会主义文化的知识,说明推进贵州民俗文化传承发展展的重要价值。	民俗文化是培育和践行社会主义核心价值观的重要文化资源，具有广泛的群众认同性和深远的价值引领力，丰富多样的民俗文化培育了贵州各民族诚信克己、与人为善、精忠爱国等优良素质，推进贵州民俗文化传承发展有利于培育和践行社会主义核心价值观，使其内化为人们的精神追求。民俗文化底蕴深厚，内容丰富，推进贵州民俗文化传承发展有利于传承中华优秀传统文化，推动中华优秀传统文化创造性转化，创新性发展。贵州省大力支持优秀传统民俗文化传承发展，设立乡村非遗传承堂或传习所，营造文明乡风和良好家风，有利于推进社会主义精神文明建设，提高民族思想道德素质，文化源远流长、博大精深的独特魅力，凝聚民族情感，增进民族文化自信。贵州省充分发掘民俗文化的思想内涵、价值理念、道德意蕴，有利于展现中华民族的优秀传统。	通过深入挖掘贵州各民族的诚信克乙、与人为善、精忠爱国等优良素质，可以充分发掘贵州民俗文化的思想内涵、价值理念和道德意蕴，从而凝聚民族自豪感，增强民族文化自信，为乡村振兴赋能，丰富了中国特色社会主义文化内容。同时，传承和发展中国优秀传统文化，使优秀传统久化兴盛不衰，也是推进贵州民俗文化传承发展的重要价值所在。	推进贵州民俗文化传承发展展的重要价值在于弘扬中国特色社会主义文化，必须坚持马克思主义为指导，为人民服务、为社会主义服务的原则。同时，推动中国传统优秀文化的创造性改造、创新性发展，实现百家齐放、百花争鸣的目标。这样可以更好地传承和发扬贵州民俗文化，让其在当代社会焕发出新的生机和活力，为建设社会主义文化强国贡献力量。	a	a	推进贵州民俗文化传承发展的重要价值主要体现在以下几个方面： 1. **文化自信与民族凝聚力**：民俗文化是民族文化的重要组成部分，它承载着各民族的历史记忆、精神追求和价值观念。通过保护和传承民俗文化，可以增强民族文化自信，促进各民族之间的相互理解和尊重，增强民族凝聚力。 2. **乡村振兴的文化支撑**：民俗文化是乡村文化的重要内容，它能够为乡村振兴提供文化支撑，提升乡村的文化软实力，促进乡村经济社会的和谐发展。 3. **文化多样性与创新**：贵州省各民族的民俗文化多样性强，具有独特的文化特色和创新精神。通过推进民俗文化的传承发展，可以更好地发掘和展示文化多样性，促进文化创新，提升文化竞争力。 4. **旅游发展与经济增值**：民俗文化是旅游文化的重要组成部分，通过保护和传承民俗文化，可以吸引国内外游客，促进旅游业的发展，增加地方经济收入，实现文化资源的经济增值。 5. **传统道德与…	推进贵州民俗文化传承发展的重要价值在于保护和传承本土文化，弘扬中华民族优秀传统文化。贵州民俗文化代表了当地人民的智慧和艺术创造，是贵州文化的瑰宝。通过传承和发展民俗文化，可以增强人们对本土文化的认同感，提升文化自信心，增进民族团结和凝聚力。此外，民俗文化传承也可以促进乡村振兴，吸引更多人来到乡村参与传统文化活动，推动当地经济的发展。同时，民俗文化的传承也有助于培养人们的道德观念，传承优良传统，促进社会和谐发展。总的来说，推进贵州民俗文化传承发展不仅是对历史文化的尊重和传承，更是对当代文化建设和社会进步的贡献。 。	tie	b	b	tie	model_a	b
习总书记指出，文化振兴在乡村振兴过程中起着举足轻重的作用。贵州省大力实施乡村文化振兴示范项目，保护、传承、弘扬贵州民俗文化，让传统民俗文化在乡村振兴过程中焕发生机。民俗文化是一种来自于人民、传承于人民,又深藏于人民行为、语言和心理之中的强大精神力量,具有广泛的群众认同性和深远的价值引领力。贵州各民族在长期的历史发展过程中形成了本民族特色的民俗文化,底蕴深厚,内容丰富。侗族大歌、苗族刺绣等民俗艺术享誉中外;贵州夜郎文化、安顺的屯堡文化历史悠久,毕节大方百里杜鹃祭花神、锦屏斗牛节等民间节会兴盛不衰。丰富多样的民俗文化培育了贵州各民族诚信克己、与人为善、精忠爱国等优良素质。近年来,贵州省大力支持优秀传统民俗文化传承发展,设立乡村非遗传承堂或传习所，营造文明乡风和良好家风。充分发掘责州民俗文化的思想内涵、价值理念、道德意蕴,凝聚民族情感,增进民族文化自信,赋能乡村振兴	学校拟举办“贵州民俗文化进校园”主题活动,以此发展贵州优秀民俗文化,请你围绕该活动提出两条具体建议。	通过校园广播站、黑板报、主题班会等平台介绍贵州民俗文化。开展以拍摄贵州优秀民俗文化为素材的校园微电影大赛。	建议一：活动应该融入社会实践，让学生亲身体验贵州民俗文化，从而凝聚和增强他们对民族的情感认同。 建议二：通过活动培养学生对民族文化的自信，让他们自豪地展示和传承贵州优秀的民俗文化。	建议一：组织专家学者开展民俗文化讲解的讲座，让学生通过专业人士的讲解深入了解贵州的优秀民俗文化，增强对传统文化的认识和理解。 建议二：举办各种形式的优秀民俗文化活动，如传统手工艺品制作展示、民俗乐器演奏比赛等，让学生通过参与亲身体验传统文化的魅力，激发对民俗文化的兴趣和热爱。	tie	tie	建议一：深入挖掘民俗文化元素，融入教育教学 在“贵州民俗文化进校园”主题活动中，可以将民俗文化元素融入到学校的教育教学中。例如，可以通过课程设计，让学生了解和学习侗族大歌、苗族刺绣等传统艺术，通过实践活动，让学生亲身体验和参与到民间节会中，如毕节大方百里杜鹃祭花神、锦屏斗牛节等。同时，学校可以邀请民俗文化专家进行讲座，介绍民俗文化的历史背景、文化内涵和价值意义，增强学生的文化认同感和民族自豪感。 建议二：建立民俗文化传承基地，培养文化传承人才 学校可以在校园内建立民俗文化传承基地，收集和保存贵州各民族的民俗文化遗产，如文物、图书、影像资料等，并定期举办展览、讲座、工作坊等活动，普及民俗文化知识。同时，学校可以设立民俗文化研究社，鼓励学生参与民俗文化的研究和传承，培养学生的文化传承和创新能力。通过这些活动，可以培养一批文化传承人才，为贵州民俗文化的发展注入新的活力。	建议一：邀请当地民俗文化传承人或专家到学校进行讲座或教学，向学生传授传统技艺或知识。通过实地展示或互动体验，让学生深入了解贵州丰富多彩的民俗文化，激发学生对传统文化的兴趣和热爱。 建议二：组织学生参与民俗文化传统活动或手工艺制作，如学习绘制苗族刺绣、制作侗族手工艺品等。通过亲身参与，让学生感受到传统文化的魅力和价值，培养他们对民俗文化的继承和传承意识。 。	tie	tie	tie	tie	tie	tie
2021年3月5日,国务院总理李克强在《政府工作报告》中提出,坚持扩大内需这个战略基点,充分挖掘国内市场潜力。健全城乡流通体系,加快电商、快递进农村,扩大县乡消费。稳定增加汽车、家电等大宗消费，取消对二手车交易不合理限制，增加停车场、充电桩、换电站等设施,加快建设动力电池回收利用体系。发展健康、文化、旅游、体育等服务消费。鼓励企业创新产品和服务,便利新产品市场准入,推进内外贸产品同线同标同质。保障小店商铺等便民服务业有序运营。运用好“互联网+”,推进线上线下更广更深融合,为消费者提供更多便捷舒心的服务和产品。	结合材料和所学经济生活知识，分析说明我国充分挖掘国内市场潜力的积极影响。	有利于拉动经济增长，促进生产发展，增强消费对经济发展的基础性作用，提升产业链供应链现代化水平，优化产业结构，有利于加快发展新业态、新模式、新产品，增加有效供给，规范市场秩序，完善居民的消费环境，改善消费结构，有利于满足人民对美好生活的需要，推进科技创新，促进产业融合，有利于提高供给质量，形成更多新的增长点、增长极。	充分挖掘国内市场潜力的积极影响主要体现在以下几个方面：首先，通过减少城乡差距，健全城乡流通体系，加快电商、快递进农村，扩大县乡消费，能够促进农村地区经济发展，提升居民生活水平。其次，优化社会设施，增加停车场、充电桩、换电站，不仅方便了人们的生活，也为新兴产业发展提供了支持。再者，升级市场配置，提高市场规则，保障小店商铺等民生服务业有序运营，有利于推动市场经济的发展，激发企业创新活力。最后，推动内部贸易产业同线同标同质，有助于提升国内产品质量，增强国内市场竞争力，推动经济持续稳定增长。因此，充分挖掘国内市场潜力对我国经济发展具有重要的积极影响。	充分挖掘国内市场潜力对我国有着积极影响。首先，这有利于健全城乡物流通体系，加快电商快递进农村，扩大县乡消费，促进城乡经济平衡发展。其次，这有利于加快建设动力电池回收利用体系，推动绿色可持续发展。同时，充分挖掘国内市场潜力便利于新节品市场介入，推进内外段产品品同标同价，促进市场公平竞争。最后，这有利于保障小店铺箱铺管便民服务业，促进就业增长，提升居民生活质量。因此，充分挖掘国内市场潜力对我国经济发展具有重要意义。	b	b	充分挖掘国内市场潜力对于中国经济的发展具有积极的影响，主要体现在以下几个方面： 1. **促进经济增长**：扩大内需可以增加消费支出，刺激生产和就业，从而推动经济增长。例如，通过加快电商和快递的进农村，可以提高农村居民的消费能力，促进农村市场的活跃。 2. **提升产业结构**：发展健康、文化、旅游、体育等服务消费，可以促进产业结构的优化升级，减少对传统大宗消费品的依赖，提高经济的综合竞争力。 3. **增强市场活力**：取消对二手车交易不合理限制，增加停车场、充电桩、换电站等设施，可以促进汽车等大宗消费市场的活跃，增强市场的活力和竞争性。 4. **推动技术创新**：鼓励企业创新产品和服务，可以促进技术进步和创新，提高产品和服务的质量和竞争力。 5. **提升居民生活水平**：保障小店商铺等便民服务业有序运营，可以提高居民的生活便利性，提升居民的生活水平和满意度。 6. **促进区域协…	我国充分挖掘国内市场潜力的积极影响主要体现在以下几个方面： 1. 促进经济增长：通过扩大内需，可以刺激消费，拉动GDP增长。尤其是在当前全球经济不确定性增加的情况下，依靠国内市场可以降低对外部市场的依赖，提高经济的韧性。 2. 促进产业结构升级：国内市场需求的增加会带动相关产业的发展，促进产业结构升级和技术创新。比如加快电商、快递进农村，推进动力电池回收利用体系建设等举措，都将有利于促进相关产业的发展和升级。 3. 促进就业：扩大内需将刺激企业生产和服务业的需求，增加就业机会，降低失业率，提高居民收入水平，进而促进社会稳定。 4. 促进区域均衡发展：通过健全城乡流通体系、加快电商、快递进农村等措施，可以促进农村地区的发展，缩小城乡差距，实现区域经济的均衡发展。 综上所述，充分挖掘国内市场潜力将对我国经济发展和社会进步带来积极影响。	a	b	b	a	model_a	b
喊口号、装样子、下表面功夫、做官样文章……人民群众对形式主义、官僚主义深恶痛绝。形式主义不求实效，官僚主义高高在上……问题的后果就是延误工作、疏远群众、败坏风气。紧盯“不担当、不作为、乱作为、假作为”等形式主义、官僚主义典型问题，各级纪检监察机关持续加大查处力度。2020年初，中央纪委国家监委对数据统计指标作出调整，将查处形式主义、官僚主义问题数据纳入公布内容。2020 年 1 至 12 月，全国共查处形式主义、官僚主义问题 78 711 起，批评教育帮助和处理117 606人,其中党纪政务处分62 595人,释放了进一步向形式主义、官僚主义突出问题亮剑的鲜明信号。	结合材料并运用政治生活知识，说明我国政府应如何克服形式主义、官僚主义。	坚持求真务实的工作作风和从群众中来到群众中去的工作方法，深入群众，强化求真务实，使政府工作经得起实践、群众和历史的检验。坚持依法行政，坚持法定职责必须为、法无授权不可为，坚决纠正不担当、不作为、乱作为、假作为。建立全面的行政监督体系，加强纪检监察机关等对政府权力的制约和监督。	为了克服形式主义和官僚主义，我国政府应当坚持以为人民服务为宗旨，始终对人民负责。不能只注重形式，做表面功夫，而应该积极履行政府的职能，简政放权，提高工作效率，不拖延误事，也不疏远群众。政府应该实行政务公开，打造阳光型政府，确保能够接受人民、党和国家的监督，不胡作非为。这样才能真正践行为民务实的承诺。	要克服形式主义和官僚主义，我国政府应该坚持以人民为中心，切实为人民服务。这就要求政府在工作中要实事求是，不做虚假的形式文章，真正解决人民群众的实际困难。同时，政府应当依法行政，科学制定政策，把权力关进制度的笼子里，做到有法可依、有据可循，避免随意扩张权力和滥用权力的情况发生。 此外，政府还应坚持从群众中来到群众中去的工作作风，求真务实、平等相助，依靠群众，听取群众的意见和建议，真正从群众的角度出发，解决问题。最重要的是，政府要坚持全面从严治党，确保党的先进性和纯洁性，严厉打击官僚主义现象的滋生，确保政府工作的高效性和透明度，为人民群众提供更好的服务。这样，政府才能更好地克服形式主义和官僚主义，实现真正为人民服务的宗旨。	a	a	为了克服形式主义和官僚主义，中国政府采取了一系列措施来加强对这些问题的查处，并推动政治生活的健康发展。首先，政府通过加强监督和检查，确保政策的落实和执行力度。例如，通过建立健全监督体系，包括纪检监察机关的日常监督和专项检查，确保各级政府和部门的工作不偏离正确方向。 其次，政府鼓励创新和实效，推动工作方式的变革。例如，通过简化流程、优化服务、提高工作效率，减少不必要的繁文缛节，确保工作的实效性。 再次，政府加强对干部的教育和培训，提高他们的政治素养和业务能力。通过开展形式主义和官僚主义的教育活动，帮助干部认识到这些问题的危害，增强他们的责任感和使命感。 最后，政府通过公开透明的方式，公布查处形式主义和官僚主义的结果，形成社会监督的压力。例如，通过媒体和互联网等渠道，公布查处的数据和案例，提高政府工作的透明度和公信力。 总之，中国政府通过加强监督、推动工作方式变革、加强干部教育和透明公开等措…	我国政府应该采取一系列措施来克服形式主义、官僚主义。首先，政府部门需要加强制度建设，建立健全责任追究机制，确保领导干部真正担当起自己的责任，不敷衍塞责。其次，政府应该加强对干部的教育培训，提高他们的责任意识和服务意识，让他们真正为人民群众服务。此外，政府可以通过加强监督检查，及时发现和纠正形式主义、官僚主义问题，从根本上杜绝这些现象的发生。最重要的是，政府要倡导简政放权，减少繁文缛节，减轻基层干部的工作负担，让他们有更多的时间和精力去解决实际问题，提高工作效率。通过这些措施的实施，相信我国政府能够有效克服形式主义、官僚主义，提高政府的服务水平，赢得人民群众的信任和支持。 。	a	a	a	a	stud_a	a
小康是中华民族的千年梦想和夙愿。100年来，中国共产党团结带领中国人民顽强拼搏，几代人一以贯之、接续奋斗，从“小康之家”到“小康社会”，从“总体小康”到“全面小康”，从“全面建设”到“全面建成”，小康目标不断实现，小康梦想成为现实。2021 年 9 月 28 日，国务院新闻办公室发表《中国的全面小康》白皮书。白皮书指出，在一个底子薄、基础弱、国情复杂的大国，全面建成惠及十几亿人口的小康社会，极不平凡，极不容易,中国共产党和中国人民付出了长期艰辛努力。全面建成小康社会，中国人民过上了好日子，但还不富足，人民日益增长的美好生活需要和不平衡不充分的发展之间的矛盾仍然存在。中国共产党将团结带领人民，向着实现人的全面发展、全体人民共同富裕继续迈进。白皮书还指出、传承弘扬中华优秀传统文化。中华优秀传统文化创造性转化、创新性发展，焕发新的生机活力，延续了民族文化血脉，凝聚了民族精神，点亮了人们的小康生…	结合材料,运用文化生活知识,说明我们应如何让传统文化更可游可感可知、更好懂好听好读。	传统文化是中华民族长期共同生活过程中创造的，要坚持高度的文化自信，传承文化基因，丰富时代内涵，注入时尚元素，融入现代生活。正确处理文化继承和发展的关系，继承传统，推陈出新。挖掘中华优秀传统文化的价值和精神内涵，为中华民族生生不息、实现中华民族伟大复兴提供丰厚精神滋养，凝聚起中国人民的精神力量。综合利用各种资源，对于传统文化进行创造性转化、创新性发展，转化为符合当今时代特点和要求的新内涵和新的呈现形式，使之与当代文化相适应、与现代社会相协调。	要让传统文化更可游可感可知、更好懂好听好读，我们可以采取一些措施。首先，我们要结合现代科技，利用互联网+的方式来传播传统文化，提高其趣味性和娱乐性。其次，我们要不断创新，将传统文化与大众联系起来，激发人们的好奇心和探索欲望，从而更深入地了解传统文化。同时，我们也要推陈出新，取其精华，去其糟粕，发扬传统文化优秀部分，并加以改造，使其更好读、更好听。最后，增强宣传力度，通过社会宣传，让人民在潜移默化中接受传统文化，使其更可感可知。通过这些努力，我们可以让传统文化更好地融入现代生活，被更多人所喜爱和传承。	让传统文化更可游可感可知、更好懂好听好读的方法有很多。首先，我们要让传统文化在创新中发展，激发其创造性和创新性，让中华优秀传统文化焕发生机活力。其次，我们要让传统文化与时俱进，让传统经典进入校园、走进课堂、陈列于博物馆，让更多人有机会接触和了解传统文化。最后，我们可以将传统文物与科技相结合，让收藏在博物馆里的文物、陈列于大地上的遗产书写在书籍里的文字都活起来，让传统文化更加生动有趣，易于理解和传播。通过这些方法，我们可以让更多人喜欢、了解和传承传统文化。	a	a	为了让传统文化更可游可感可知、更好懂好听好读，我们可以采取以下措施： 1. **教育与课程融合**：将传统文化融入学校教育体系中，通过课程设计让学生了解和学习传统文化。例如，通过戏曲、音乐、舞蹈、书画等艺术形式，让学生在实践中体验和理解传统文化。 2. **文化活动推广**：举办各种形式的传统文化活动，如传统节日庆祝、文化节、艺术展览等，鼓励公众参与和体验。例如，春节期间的灯会、端午节的粽子制作、中秋节的月饼分享等，都可以让人们在实践中感受到传统文化的魅力。 3. **数字化传播**：利用现代信息技术，如互联网、社交媒体、移动应用等，数字化传播传统文化。通过视频、音频、图像等多媒体形式，制作和分享传统文化内容，使其更容易被现代人理解和接受。 4. **社区文化建设**：在社区内建立文化中心或活动室，举办各种传统文化讲座、工作坊和展览，鼓励社区居民参与和学习。例如，社区内可以设立书法、绘画…	要让传统文化更可游可感可知、更好懂好听好读，首先可以通过各种形式的文化活动和教育来普及传统文化知识。比如在学校课程中增加传统文化的内容，举办传统文化讲座、展览等活动。同时，可以利用现代科技手段，如互联网、移动应用等，将传统文化资源数字化，让更多人可以通过手机或电脑随时了解传统文化知识。此外，还可以通过文化旅游、文化节庆等方式，让人们亲身感受传统文化的魅力，增强对传统文化的认同和理解。通过这些方式，可以让传统文化更加贴近人们的生活，让更多人能够参与其中，从而实现传统文化更可游可感可知、更好懂好听好读的目的。	a	a	a	tie	stud_a	a
小康是中华民族的千年梦想和夙愿。100年来，中国共产党团结带领中国人民顽强拼搏，几代人一以贯之、接续奋斗，从“小康之家”到“小康社会”，从“总体小康”到“全面小康”，从“全面建设”到“全面建成”，小康目标不断实现，小康梦想成为现实。2021 年 9 月 28 日，国务院新闻办公室发表《中国的全面小康》白皮书。白皮书指出，在一个底子薄、基础弱、国情复杂的大国，全面建成惠及十几亿人口的小康社会，极不平凡，极不容易,中国共产党和中国人民付出了长期艰辛努力。全面建成小康社会，中国人民过上了好日子，但还不富足，人民日益增长的美好生活需要和不平衡不充分的发展之间的矛盾仍然存在。中国共产党将团结带领人民，向着实现人的全面发展、全体人民共同富裕继续迈进。白皮书还指出、传承弘扬中华优秀传统文化。中华优秀传统文化创造性转化、创新性发展，焕发新的生机活力，延续了民族文化血脉，凝聚了民族精神，点亮了人们的小康生…	实现共同富裕是一个长期进程,必须戒骄戒躁,切忌急于求成。就如何推进共同富裕提出两点看法。	坚定实施乡村振兴战略，缩小城乡差距、地域差距和收入差距。坚定实施区域协调发展战略，解决发展的不平衡等难题。	实现共同富裕是一个长期进程，必须戒骄戒躁，切忌急于求成。推进共同富裕应该遵循两点看法：先富带动后富需要经过帮扶过程，不能搞垄断；没有富裕的人民要积极脚踏实地地去干，与社会制度相适应。	共同富裕是一个长期的过程，必须谨慎行事，不能急于求成。我们应该以同样的步伐，共同努力，坚持不懈地朝着共同富裕的目标前进。同时，我们要从基础做起，踏实地一步步前行，扎实地工作，认真努力。	tie	tie	推进共同富裕是一个复杂而深远的社会进程，需要我们既要有远见卓识，又要有实际行动。以下是我对如何推进共同富裕的两点看法： 首先，坚持公平正义原则，完善社会保障体系。共同富裕的核心在于缩小社会经济差距，实现全体人民共同富裕。为此，我们需要建立和完善社会保障体系，确保每个人都能享受到基本的生活保障和社会服务。例如，通过建立更加完善的医疗保障、教育公平和住房保障等制度，确保每个人都能在健康、教育和住房等方面得到基本的保障。这不仅是实现共同富裕的基础，也是维护社会和谐稳定的关键。 其次，鼓励创新和发展，促进经济均衡发展。共同富裕不仅仅是指经济上的均衡，更是指社会的全面发展。我们需要通过激发创新活力，推动经济结构的优化升级，实现经济的均衡发展。例如，通过支持科技创新和产业升级，促进区域经济的协调发展，减少区域之间的发展差距。此外，通过税收政策、财政投资等手段，鼓励资源向社会公共服务和民生领域转移，确…	首先，推进共同富裕需要坚持科学发展观，注重整体规划和长远目标。不能只看眼前的成绩，而要注重长远的可持续发展。例如，要确保经济发展的同时不忽视环境保护，要关注贫困地区的发展，避免贫富差距进一步扩大。 其次，推进共同富裕需要注重制度建设和政策落实。要建立健全的社会保障制度，确保每个人都能享有基本的医疗、教育、养老等服务。同时，要加强对贫困地区和特殊群体的帮扶政策，确保他们能够融入共同富裕的发展大局。 .	a	a	a	model_a	b
看着朱婷和林莉们齐刷刷抬脚轻叩冠军奖台，正在备考的我，眼泪夺眶而出，肆意流淌。略显稚嫩的中国女排从逆境中奋起，杀透重围，最终夺取里约奥运金牌，靠的不只是一流的技能,更是历久弥新的女排精神。场上场下、教练队员,在国旗下集结,为祖国而征战;团结如一人,配合似双手;无论对手如何强大,都毫不畏惧,敢于亮剑;不管比分落后多少,都每球必拼,决不放弃。在这种精神激励下,教练组审时度势,合理调配阵容、打法和战术,通过精妙的指挥贯彻自己的意图;队员们始终保持高昂的斗志、如虹的气势,将自己的体能和技战术水平发挥到极致,将教练组的意图变成精彩的比赛过程,使不可能成为可能….我也该振作起来了。	请问材料是如何体现意识的能动作用的？	意识对改造客观世界有指导作用。教练组审时度势，合理调配阵容、打法和战术，通过精妙的指挥贯彻自己的意图，队员们将教练组的意图变成精彩的比赛过程，使不可能成为可能，就是这种作用的表现。意识对于人体生理活动具有调节和控制作用。队员们始终保持高昂的斗志、如虹的气势，将自己的体能和技术战术水平发挥到极致，就是这种作用的体现。	意识具有能动作用的体现在于它能指导人认识世界和改造世界。首先，意识活动具有目的性，这在材料中体现为为祖国而战的行动。其次，意识活动具有自觉选择性，这在材料中体现为教练根据形势的变化采取不同的战术。再者，意识活动具有主观能动性，这在材料中体现为教练审时度势合理调配方案、打法和技术，以及调节和控制人的生理活动。因此，意识的能动作用使人能够更好地认识和改造世界，发挥自己的潜力和技能。	意识的能动作用体现在能够主动地认识世界、主动地改造世界。另外，意识具有目的性，比如中国女排参加奥运会，就是为了获得金牌，这体现了意识具有目的性。此外，意识还具有自主选择和主动创造性，对改造客观世界具有指导作用，同时也对人体的生理活动具有调节和控制作用。	a	a	材料通过描述中国女排在备战和比赛中的团结、配合、勇敢和不放弃的精神，体现了意识的能动作用。这些精神不仅是队员们在比赛中所表现出来的技能和技术的结果，更是他们内心坚定的信念和积极的态度的体现。 首先，材料强调了“场上场下、教练队员,在国旗下集结,为祖国而征战”的团结精神。这种集体主义的意识激发了队员们的团队合作意识，使他们在比赛中能够协同默契，共同为一个目标而努力。这种团队意识的体现，正是意识能动作用的体现，因为它推动了队员们的行为和决策。 其次，材料中提到“无论对手如何强大,都毫不畏惧,敢于亮剑”的勇敢精神。这种勇敢的意识激励着队员们在面对强大对手时，能够保持冷静和坚定，不畏惧困难和挑战。这种勇敢的态度是意识能动作用的结果，因为它改变了队员们面对挑战的方式，使他们能够积极应对和克服困难。 再次，材料中提到“不管比分落后多少,都每球必拼,决不放弃”的坚持不懈的精神。这种决心和毅力是队员们意…	材料中体现了意识的能动作用主要体现在以下几个方面：首先，中国女排在面对逆境和困难的时候，能够保持高昂的斗志和如虹的气势，这表明队员们有强烈的主动进取心和积极的意识，他们愿意为团队、为国家去奋斗拼搏。其次，教练组审时度势，合理调配阵容、打法和战术，通过精妙的指挥贯彻自己的意图，这体现了教练组具有清晰的目标意识和主动策略意识，在比赛中能够根据形势变化做出正确的决策。最后，中国女排在比赛中展现出不畏强敌、敢于亮剑、每球必拼的精神，这说明他们具有强烈的自我激励和自我调节意识，能够在困难面前保持乐观积极的心态，全力以赴地拼搏奋斗。这些都是意识的能动作用在体育比赛中的具体体现。	tie	a	a	tie	stud_a	a
宪法是国家的根本法,依法治国首先是依宪治国。中国特色社会主义进入新时代,这是我国发展新的历史方位。为了更好发挥宪法在新时代坚持和发展中国特色社会主义、实现中华民族伟大复兴中的重大作用,十三届全国人大第一次会议审议通过的《中华人民共和国宪法修正案》把党的十九大确定的习近平新时代中国特色社会主义思想载入了国家根本法。	结合材料,运用“真正的哲学都是自己时代的精神的精华”的知识说明把习近平新时代中国特色社会主义思想载入宪法的依据。	任何哲学都是一定社会和时代的经济和政治在精神上的反映。经过长期努力，中国特色社会主义进入了新时代，时代的任务和要求发生了变化，新时代中国特色社会主义思想适应了这一时代发展的需要。真正的哲学都是自己时代的精神上的精华。新时代中国特色社会主义思想正确反映了当今时代的任务和要求，总结和概括了时代的实践经验和认识成果，系统回答了新时代坚持和发展什么样的中国特色社会主义、怎样坚持和发展中国特色社会主义这个重大的时代课题。把这一思想载入宪法，可以通过国家根本大法更好地指导我们社会主义现代化建设。真正的哲学是社会变革的先导，它解放人的思想，预见和指明社会的前进方向，提出社会发展的理想目标，引导人们追求美好的未来。通过将这一思想载入宪法，可以为我国社会主义现代化指明方向，通过动员和掌握人民群众，从而转化为变革社会的巨大的物质力量。	习近平新时代中国特色社会主义思想是马克思主义哲学中国化的重要成果，它是真正的哲学在当代中国的体现，是当前时代精神的精华。根据哲学是一定社会和时代精神生活的构成部分，真正的哲学是自己时代的精神的精华的原理，习近平新时代中国特色社会主义思想可以更好地反映时代的任务和要求。在宪法作为国家的根本法，依法治国的基础上，将习近平新时代中国特色社会主义思想载入宪法，符合真正的哲学掌握时代脉搏，总结实践经验和认识结果的特点。这样做可以更好地推动社会变革，解放人们的思想，更新人们的观念，预见和指明社会前进的方向，为实现中华民族伟大复兴提出理想目标，引领人们追求美好的未来。	习近平新时代中国特色社会主义思想的载入宪法是基于“真正的哲学都是自己时代的精神的精华”的原则。这一思想是对当代中国社会政治经济发展的总结和概括，是对时代任务和要求的精神反映，也是对时代脉搏的把握。习近平新时代中国特色社会主义思想的提出，正是在深刻认识当前国内外形势的基础上，总结和借鉴了中国特色社会主义实践经验和认识成果，体现了对时代精神的深刻把握，符合时代的要求和任务，因而有必要将其载入宪法，以指导中国社会主义事业不断前进。	tie	tie	把习近平新时代中国特色社会主义思想载入宪法的依据在于这一思想是对中国特色社会主义理论体系的最新发展，是对党的十九大提出的新时代中国特色社会主义事业发展要求的集中体现。习近平新时代中国特色社会主义思想是对马克思列宁主义、毛泽东思想、邓小平理论、三个代表重要思想、科学发展观的继承和发展，是中国特色社会主义进入新时代的理论成果。 这一思想深刻分析了我国发展新的历史方位，明确了新时代中国特色社会主义的总任务，即坚持和发展中国特色社会主义，实现中华民族伟大复兴的中国梦。它强调了坚持和发展中国特色社会主义的基本方略，包括坚持党的全面领导、坚持人民主体地位、坚持改革开放、坚持全面深化改革、坚持新发展理念、坚持人治和法治、坚持以人民为中心的发展思想等。 将习近平新时代中国特色社会主义思想载入宪法，是为了确保国家治理体系和治理能力现代化，确保依法治国的方向和目标与时代发展保持一致，确保宪法的生命力和前瞻性…	根据"真正的哲学都是自己时代的精神的精华"的原则，我们可以理解为在特定时代的历史条件下，哲学思想应该与时俱进，反映当时社会的发展需求和人们的思想观念。习近平新时代中国特色社会主义思想是在中国特殊国情下形成的，是对当代中国社会主要矛盾变化、国家治理体系现代化、国家治理能力现代化等方面的新认识和新要求的总结和阐述。将这一思想载入宪法，是因为这一思想是当前中国社会发展的需要，是中国特色社会主义发展的指导方针和行动纲领，具有时代性和现实意义。因此，把习近平新时代中国特色社会主义思想载入宪法是符合"真正的哲学都是自己时代的精神的精华"的原则的。	tie	tie	tie	tie	tie	tie
材料一:习近平书记在主持中央政治局第二十次集体学习时强调:实现“两个一百年”奋斗目标、实现中华民族伟大复兴的中国梦,必须不断接受马克思主义哲学智慧的滋养,更加自觉地坚持和运用辩证唯物主义世界观和方法论,增强辩证思维、战略思维能力,努力提高解决我国改革发展基本问题的本领。材料二:马克思主义哲学的产生,实现了哲学史上的伟大变革。它是人类认识史上一次最为美丽的日出,是人类认识发展结出的丰美硕果。	请简述马克思主义哲学的基本特征。	马哲的基本特征是第一次在科学的基础上实现唯物主义和辩证法的有机结合，实现了唯物辩证的自然观和历史观的统一，实现了实践基础上的科学性和革命性的统一。	马克思主义哲学的基本特征包括：实现了“两个有机统一结合，辩证法”的理论基础；实现了在实践基础上科学性与革命性的统一；是科学的世界观与方法论的统一。	马克思主义哲学的基本特征包括辩证法和唯物主义的有机结合，唯物主义的自然观与历史观相统一，以及物质社会实践的科学性与革命性的统一。马克思主义哲学是无产阶级科学的世界观与方法论，反映了物质的本质和规律，所有理论均来源于实践并经过反复检验。它不仅指导人们认识社会，改造社会，还引导人们树立正确的人生观、价值观和信念，是哲学史上的重要变革。	a	a	马克思主义哲学是由卡尔·马克思和弗里德里希·恩格斯共同发展起来的，它在哲学史上具有重要的地位。马克思主义哲学的基本特征主要体现在以下几个方面： 1. 辩证唯物主义：马克思主义哲学的核心是辩证唯物主义，它认为物质是宇宙的基础，意识是物质的反映。辩证唯物主义强调事物的内部矛盾和发展的辩证法则，认为历史发展是阶级斗争的结果。 2. 历史唯物主义：马克思主义哲学认为历史是由经济基础和上层建筑决定的，社会发展是生产力和生产关系的发展过程。历史唯物主义强调经济基础在社会结构中的决定性作用。 3. 科学社会主义：马克思主义哲学提出了科学社会主义的概念，认为社会主义是人类历史发展的必然趋势，是从资本主义社会向共产主义社会过渡的理论基础。 4. 实践观：马克思主义哲学强调实践是认识的源泉，认为理论必须与实践相结合。实践观认为人的认识活动是通过实践活动来获得知识和理解世界的。 5. 人类历史的科学性：马克思…	马克思主义哲学的基本特征包括唯物主义、辩证法和历史唯物主义。首先，马克思主义哲学是唯物主义的，强调物质的存在和发展是决定意识和社会发展的基础。其次，马克思主义哲学运用辩证法，强调事物的矛盾运动和统一规律，提倡抓住事物的本质矛盾，推动事物的发展和变化。最后，马克思主义哲学是历史唯物主义的，认为社会发展具有历史性和阶段性，历史是人类社会发展的动力和规律。通过这些基本特征，马克思主义哲学为人类认识史上带来了重大的革命性变革，对于指导人们认识世界、改造世界具有重要的意义。 。	tie	a	a	tie	stud_a	a
阅读以下材料并回答问题：材料一：某市政府在制定一项新的环保政策时，广泛征求了市民、环保组织、企业代表和专家的意见，并通过社会听证会等形式收集了各方面的反馈。最终，这项政策在得到大多数人支持的基础上得以实施。材料二：为了加强环保政策的执行力度，该市政府还成立了专门的环保执法队伍，并明确了各部门的职责。同时，政府还加强了环保宣传，提高了市民的环保意识和参与度。	1. 根据材料一，分析该市政府在制定环保政策时为何广泛征求各方面的意见？	政策制定的科学性和民主性应当得到加强，以确保政策更好地贴近实际需求和公众利益，促进公民对政策的理解和支持，提高政策的接受度和执行效果。此外，应该充分发挥社会各方面的智慧和力量，形成政策制定的合力，提高政策制定的质量和效率。	政府决策的科学性和民主性应该更加强化，需要广泛征求人民群众的意见和建议，以确保政策更好地反映人民的利益和需求同时，需要借助网络等方式拓宽公民政治参与渠道，呈现出政府依法行政的形象此外，应该充分发挥社会各方面的智慧和力量，形成政策制定的合力，提高政策制定的质量和效率，增强政府工作的透明度和公信力，以树立政府良好形象	政策的制定需要充分考虑当下实际需要和公众利益，同时注重广泛征求各方面的意见，让政策更加贴近人民，促进公众的理解和支持。此外，发挥社会各方智慧，形成合力，在政策制定中产生良好的效果，不断提高其质量和执行效果。	a	a	该市政府在制定环保政策时广泛征求各方面的意见是为了确保政策的合理性、有效性和公众接受度。通过征求市民、环保组织、企业代表和专家的意见，政府能够从不同角度和专业领域获取信息，了解各方面的需求、担忧和建议。这种多元化的意见收集有助于政府更全面地考虑政策的潜在影响，避免可能出现的误区和问题。 例如，市民的意见可以反映出他们对环保政策的实际需求和生活影响，环保组织的意见则可能更侧重于环境保护的长远目标和政策的环保效果。企业代表的意见则可能关注政策对企业运营的影响和可行性，而专家的意见则可能提供科学依据和技术建议。通过综合这些意见，政府可以制定出更加平衡、科学和有效的环保政策。 此外，通过社会听证会等形式收集反馈，可以进一步增强政策的透明度和公众参与感，提高政策实施的社会支持度。这样做有助于减少政策实施过程中的阻力，增强政策的执行力度和持久性。	根据材料一，该市政府在制定环保政策时广泛征求各方面的意见是为了确保政策的合理性和可行性。通过征求市民、环保组织、企业代表和专家的意见，可以更全面地了解各方面的需求和关切，从而更好地平衡不同利益的关系，提高政策的可接受性和执行效果。此举也有助于增强政策的民意基础，确保政策得到大多数人的支持和认可。 .	tie	a	a	tie	stud_a	a
阅读以下材料并回答问题：材料一：某市政府在制定一项新的环保政策时，广泛征求了市民、环保组织、企业代表和专家的意见，并通过社会听证会等形式收集了各方面的反馈。最终，这项政策在得到大多数人支持的基础上得以实施。材料二：为了加强环保政策的执行力度，该市政府还成立了专门的环保执法队伍，并明确了各部门的职责。同时，政府还加强了环保宣传，提高了市民的环保意识和参与度。	2. 结合材料二，说明该市政府在环保政策执行方面采取了哪些具体措施，并指出这些措施的意义。	很高兴回答你的问题，为加强环保政策的执行效果，需要成立专门的环保执法队伍，并明确各相关部门的职责。同时，加强环保宣传，提高市民的环保意识和参与度，营造全社会共同参与环保的良好氛围。这些措施的实施可以确保环保政策得到有效执行，减少政策执行过程中的阻力和障碍，促进形成全民共建共享的环保格局，为经济社会的可持续发展保驾护航，也能留给后代更加美好的生态环境。	为加强环保政策的执行，该市政府采取了一系列具体措施。首先，他们成立了一支专门的环保执法团队，明确各部门的任务，加强了政策的执行力度和效果。其次，他们加强了环保宣传工作，提高了市民的环保意识和参与度，营造了共建共享环保事业的良好氛围。这些措施将确保环保政策得到充分执行，降低了执行过程中的困难和障碍。同时，推动了全民参与共建共享环保格局的发展，促进了经济和社会的可持续发展，为我们的后代留下了更加美好的生态环境。	该市政府在环保政策执行方面采取了多项具体措施。首先，他们加强了环保宣传，提高市民的环保意识和参与度，营造了全社会共同参与环保的良好氛围。其次，他们促进经济社会可持续发展，保护生态环境，为子孙后代留下更好的生活环境。 这些措施的意义在于，通过加强宣传和提高市民的环保意识，可以让更多的人了解环保政策的重要性并积极参与其中，从而减少政策执行过程中的阻力和障碍。同时，促进经济社会可持续发展和保护生态环境，不仅可以改善当下的环境质量，也可以为未来的子孙后代留下更好的生活环境，实现环境和经济的双赢。因此，这些措施对于保护环境、促进经济社会可持续发展具有重要意义。	b	b	结合材料二，该市政府在环保政策执行方面采取了以下具体措施： 1. 成立专门的环保执法队伍：这意味着政府在执行环保政策时有了专业的力量来确保政策的有效执行。专门的执法队伍能够更有效地监测和打击违反环保法规的行为，提高执法效率和力度。 2. 明确各部门的职责：通过明确各部门的职责，政府可以确保环保政策的执行不仅仅依赖于环保部门，而是整个政府体系的共同努力。每个部门都有明确的责任和任务，这样可以避免责任分散，提高政策执行的协调性和效率。 3. 加强环保宣传：通过加强环保宣传，政府提高了市民的环保意识和参与度。宣传可以通过多种渠道进行，如媒体报道、公共活动、教育项目等，帮助市民了解环保的重要性和个人在环保中的作用，从而激发他们的环保行为。 这些措施的意义在于： - 提高了环保政策的执行力度和效率，确保政策能够在实际操作中得到有效实施。 - 促进了社会各界的共同参与，包括市民、企业和政府部门，形成…	该市政府在环保政策执行方面采取了两个具体措施：成立了专门的环保执法队伍和加强了环保宣传。首先，成立专门的环保执法队伍可以确保环保政策得到有效执行，监督各部门的环保工作，及时处理环境违法行为，提高了环保政策执行的效率和效果。其次，加强环保宣传可以提高市民的环保意识和参与度，让更多人了解环保政策的重要性，积极参与到环保工作中，形成全社会共同推动环保事业的良好氛围。 通过这些措施，该市政府可以有效推动环保政策的实施，提高环保政策的执行力度，确保环境保护工作取得实质性成效，从而全面提升城市的环保水平和居民的生活质量。 。	tie	a	a	tie	stud_a	a
阅读下列材料，回答问题：材料一：在现代社会中，政治制度是一个国家的生命。社会主义政治制度，是社会主义国家的根本制度，它体现了社会主义国家的性质，是社会主义国家区别于其他国家的标志。材料二：在我国，中国共产党是最高政治领导力量。它坚持全面领导、长期执政，不断自我革命，通过法治化、制度化的安排把党的领导落实到国家治理体系的各个方面，确保党的领导始终坚强有力。材料三：人民民主专政是我国的国体，它体现了我国社会主义国家的根本性质。我国宪法明确规定：“中华人民共和国是工人阶级领导的、以工农联盟为基础的人民民主专政的社会主义国家。	1.请简述我国社会主义政治制度的特点。	坚持党的领导是保障我国社会主义现代化建设顺利进行的关键要素。我国政治制度是适合我国国情的基本政治制度，它体现着我国人民民主专政国家性质，并为建立其他国家管理制度奠定了基础。坚持党的领导是坚定维护四项基本原则的核心要保障。只有坚决地坚持党的领导，才能确保我国社会主义现代化建设的正确方向、创造出稳定和谐的社会环境以及调动各方积极因素，在社会主义现代化建设中发挥最大的作用。	我国社会主义政治制度的特点包括坚持党的领导是保障我国社会主义现代化建设顺利进行的关键要素。我国政治制度是适合我国国情的基本政治制度，体现了我国人民民主专政国家性质，并为建立其他国家管理制度奠定了基础。我国是一个以人民民主专政为特色的社会主义国家，公民与政府的关系是和谐的新型关系。政府治理城市环境需要公民的积极参与和支持。政府通过投资改善教育、医疗、住房等民生问题，促进了经济的发展和社会的进步。	我国社会主义政治制度的特点在于坚持党的领导是保障现代化建设顺利进行的核心。这种政治制度适合我国国情，体现了人民民主专政的理念，为其他国家管理制度的建立奠定了基础。在我国社会主义国家，政府与公民之间的关系和谐，政府通过投资教育、医疗和住房等领域来推动经济发展和社会进步。	b	b	我国社会主义政治制度的特点主要体现在以下几个方面： 首先，中国共产党的领导地位是社会主义政治制度的核心。根据材料二，中国共产党是最高政治领导力量，坚持全面领导和长期执政，通过法治化和制度化的方式确保党的领导在国家治理体系中得到有效实施。这意味着党的决策和政策在国家的各个方面都有指导作用。 其次，人民民主专政是社会主义国家的根本国体，体现了我国社会主义国家的根本性质。如材料三所述，中华人民共和国是工人阶级领导的、以工农联盟为基础的人民民主专政的社会主义国家。这表明我国的政治制度是以人民为基础，通过民主选举、民主决策、民主管理和民主监督的方式，确保国家的政治权力真正属于人民。 再次，社会主义政治制度强调法治和制度化。社会主义政治制度不仅仅是党的领导形式，更是通过法律和制度来规范国家和社会的行为，确保国家治理的公正性和效率性。这种法治化和制度化的安排有助于提高国家治理的稳定性和可持续性。 最后…	我国社会主义政治制度的特点包括以下几个方面：首先，中国共产党是最高政治领导力量，坚持全面领导、长期执政，通过法治化、制度化的安排确保党的领导始终坚强有力。其次，人民民主专政是我国的国体，体现了我国社会主义国家的根本性质，强调工人阶级领导的、以工农联盟为基础的人民民主专政的社会主义国家。最后，我国社会主义政治制度下，党的领导贯穿于国家治理体系的各个方面，确保政治稳定和国家发展的方向。。	a	b	b	a	model_a	b
阅读下列材料，回答问题：材料一：在现代社会中，政治制度是一个国家的生命。社会主义政治制度，是社会主义国家的根本制度，它体现了社会主义国家的性质，是社会主义国家区别于其他国家的标志。材料二：在我国，中国共产党是最高政治领导力量。它坚持全面领导、长期执政，不断自我革命，通过法治化、制度化的安排把党的领导落实到国家治理体系的各个方面，确保党的领导始终坚强有力。材料三：人民民主专政是我国的国体，它体现了我国社会主义国家的根本性质。我国宪法明确规定：“中华人民共和国是工人阶级领导的、以工农联盟为基础的人民民主专政的社会主义国家。	2.请说明中国共产党在社会主义国家治理中的核心作用。	坚持中国共产党的领导以确保政治制度的正确方向和高效运行。实行人民民主专政，保障人民当家作主的权利，实现最广大人民的根本利益。实行人民代表大会制度，确保国家权力来自人民，体现人民意志。实行民族区域自治制度，保障少数民族的合法权益，促进民族团结和共同发展。实行基层群众自治制度，增强人民群众的参与感和归属感，推动社会主义民主政治的发展。	为确保环境保护政策的有效实施，减少政策执行过程中的阻力和障碍，需要充分发挥中国共产党在社会主义国家治理中的核心作用。除了积极探索民主协商、民主决策、民主管理和民主监督等途径和形式，保障人民当家作主的权利，还应注重提高政府的透明度，公开政务信息，接受公众监督和参与，进一步保证政府的公信力和合法性。	在社会主义国家治理中，中国共产党担当着核心作用。作为执政党，中国共产党领导着国家的政治和社会发展，坚持以人民为中心的发展思想，始终把人民的利益放在首位。在中国共产党的领导下，实行多党合作和政治协商制度，促进各方面的共识和团结，推动国家的长期稳定和发展。此外，中国共产党还倡导并推动基层群众自治制度，让广大人民群众参与国家治理，实现人民当家作主的理念。在社会主义国家治理中，中国共产党的核心作用不可替代，为国家的繁荣和稳定发挥着至关重要的作用。	b	b	中国共产党在社会主义国家治理中的核心作用是其作为最高政治领导力量的角色。根据材料二，中国共产党坚持全面领导和长期执政，通过法治化和制度化的方式确保党的领导在国家治理体系的各个方面得到落实。这意味着党不仅在政策制定和执行上发挥着领导作用，而且在国家的各级政府机构、社会组织和重要领域都有指导和监督权。 这种领导方式体现了社会主义政治制度的特点，即通过党的领导来实现国家的根本制度和国家治理的有效性。中国共产党通过不断的自我革命，确保党的领导始终保持坚强有力，这是中国社会主义国家治理中的一个关键因素。 此外，根据材料一，社会主义政治制度是社会主义国家的根本制度，体现了社会主义国家的性质，并是区别于其他国家的标志。因此，中国共产党在这些政治制度中发挥核心作用，是维护社会主义国家性质和实现国家治理有效性的重要保证。	中国共产党在社会主义国家治理中扮演着核心的领导作用。作为最高政治领导力量，中国共产党坚持全面领导、长期执政，通过不断自我革命，确保党的领导始终坚强有力。党的领导贯穿于国家治理体系的各个方面，通过法治化、制度化的安排，确保党的领导得以落实。中国共产党的核心作用体现在其对国家方针政策的制定、对经济社会发展的引领、对社会稳定的维护等方面。总之，中国共产党在社会主义国家治理中扮演着不可替代的核心角色。	tie	a	a	tie	stud_a	a
阅读下列材料，回答问题：材料一：在现代社会中，政治制度是一个国家的生命。社会主义政治制度，是社会主义国家的根本制度，它体现了社会主义国家的性质，是社会主义国家区别于其他国家的标志。材料二：在我国，中国共产党是最高政治领导力量。它坚持全面领导、长期执政，不断自我革命，通过法治化、制度化的安排把党的领导落实到国家治理体系的各个方面，确保党的领导始终坚强有力。材料三：人民民主专政是我国的国体，它体现了我国社会主义国家的根本性质。我国宪法明确规定：“中华人民共和国是工人阶级领导的、以工农联盟为基础的人民民主专政的社会主义国家。	3.如何理解人民民主专政是我国社会主义国家的根本性质？	中国共产党在中国特色社会主义事业中扮演着不可替代的领导核心角色，它始终坚持以人民为中心的发展思想，并将人民的利益放在首位，不断推动国家发展进步。党坚持全面领导并长期执政，通过法治化和制度化的安排，将党的领导落实到国家治理体系的各个方面，确保党的领导始终坚强有力。党在国家治理中扮演着总揽全局、协调各方的核心作用，推动国家治理体系和治理能力的现代化。	。人民民主专政是我国社会主义国家的根本性质，体现了中国共产党领导下的国家治理特点，是中国特色社会主义制度的重要组成部分。在人民民主专政下，党始终代表人民的利益，保障人民的权益，通过党的领导，实现国家和社会的长治久安，促进经济社会发展，实现国家富强和人民幸福。	人民民主专政是我国社会主义国家的根本性质。中国共产党作为中国特色社会主义事业的领导核心，具有不可替代的作用。协商民主也是党领导的重要方式，在我国社会主义民主政治中具有独特的形式和优势。党始终坚持以人民为中心的发展思想，不断推动国家的发展和进步。此外，坚持民主决策，让人民群众更多地参与决策过程，保障人民群众的知情权、参与权、表达权和监督权，也是党的重要举措。党在国家治理中发挥着总揽全局和协调各方面的核心作用，推动国家治理体系和治理能力的现代化。	b	b	人民民主专政是我国社会主义国家的根本性质，可以理解为在社会主义国家中，人民通过民主选举产生的政府拥有专门的权力来管理国家和社会，确保国家的稳定和社会主义制度的长期执政。这种制度体现了工人阶级的领导地位和以工农联盟为基础的社会结构，保障了人民群众的根本利益。 在中国的具体情况下，中国共产党作为最高政治领导力量，通过全面领导和长期执政，确保了党的领导始终坚强有力。同时，通过法治化和制度化的安排，党的领导被融入到国家治理体系的各个方面，保障了人民民主专政的有效实施。 例如，中国的选举制度、法律制度和政策决策过程都体现了人民民主专政的原则，即通过民主途径选举产生代表，制定和执行法律，确保国家政策服务于人民的根本利益。同时，中国的宪法也明确规定了国家的性质，即中华人民共和国是工人阶级领导的、以工农联盟为基础的人民民主专政的社会主义国家，这进一步强调了人民民主专政在中国社会主义国家中的根本性质。	人民民主专政是指在社会主义国家中，人民作为主体参与国家政治、经济、文化生活并实行民主管理的一种制度。在我国社会主义国家中，人民民主专政体现了工人阶级领导的特点，体现了工农联盟的基础。这种制度确保了人民的权益得到保障，保证了国家的长治久安。通过人民民主专政，实现了人民对国家事务的管理权和决策权，真正实现了人民当家作主。因此，人民民主专政作为我国社会主义国家的根本性质，体现了我国政治制度的特点，也是确保国家长治久安的重要保障。	a	b	a	a	model_a	a
江山就是人民，人民就是江山。中国共产党领导人民打江山、守江山，守的是人民的心。治国有常，利民为本。为民造福是立党为公、执政为民的本质要求。必须坚持在发展中保障和改善民生，鼓励共同奋斗创造美好生活，不断实现人民对美好生活的向往。我们要实现好、维护好、发展好最广大人民根本利益，紧紧抓住人民最关心最直接最现实的利益问题，坚持尽力而为、量力而行，深入群众、深入基层，采取更多惠民生、暖民心举措，着力解决好人民群众急难愁盼问题，健全基本公共服务体系，提高公共服务水平，增强均衡性和可及性，扎实推进共同富裕。中共中央总书记习近平在党的二十大报告中的上述讲话掷地有声，彰显了中国共产党坚持以人民为中心的发展思想。	结合上述材料，运用“中国共产党的先进性”的知识，说明我们党始终坚定人民立场的原因。	党的性质和宗旨要求党坚定人民立场，以保持党的先进性。中国共产党是中国工人阶级的先锋队，同时是中国人民和中华民族的先锋队，全心全意为人民服务是中国共产党的根本宗旨。人民是历史的创造者，是决定党和国家前途命运的根本力量，党必须始终坚持以人民为中心。坚定人民立场，才能巩固党的执政地位，推动社会主义现代化事业不断前进。中国共产党始终坚持立党为公、执政为民，党始终把最广大人民的根本利益作为一切工作的出发点和落脚点。	我们党始终坚定人民立场的原因在于，人民立场是我国的根本立场，我国的初心和使命是为中华民族谋复兴，为中国人民谋幸福。全心全意为人民服务是我国的根本宗旨，立党为公，执政为民是我国的执政理念。我们始终坚持以人民为中心的发展理念，认为人民是决定国家前途命运的重要力量。人民民主的社会主义国家是我国的国体。因此，我们党始终坚定地站在人民的一边，将人民的利益放在首位，以实际行动践行党的宗旨，始终不忘初心，全心全意为人民服务。	我们党始终坚定人民立场的原因在于我们的根本宗旨是全心全意为人民服务，根本立场是人民立场。人民是历史的创造者，为民造福是立党为公、执政为民的本质要求。中国共产党之所以保持先进性和纯洁性，走在时代前列，就在于坚持以人民为中心的发展思想，实事求是，解放思想，脚踏实地，求真务实。这些是我们党永葆生机活力的有力法宝。	a	b	中国共产党始终坚定人民立场的原因在于其坚持以人民为中心的发展思想，这是党的根本宗旨和本质要求。党的宗旨是全心全意为人民服务，这一原则体现在党的各项政策和行动中，旨在保障和改善民生，促进共同富裕，实现人民对美好生活的向往。 党的先进性体现在以下几个方面： 1. **坚持人民主体地位**：中国共产党认识到人民是历史的创造者和社会的主体，始终将人民的利益放在首位，确保党的政策和行动能够真正服务于人民。 2. **深入群众、深入基层**：党通过深入基层、深入群众，了解人民的需求和期望，确保党的决策和行动能够贴近人民、贴近实际，有效解决人民群众的急难愁盼问题。 3. **不断改进和完善制度**：为了更好地服务人民，党不断改进和完善制度，确保公共服务体系的均衡性、可及性，提高公共服务的质量，满足人民群众的日益增长的物质和文化需求。 4. **坚持发展中的保障和改善民生**：党认识到经济发展和社会进步…	中国共产党始终坚定人民立场的原因在于其先进性，即党的性质和宗旨要求党始终代表最广大人民的利益。作为马克思主义政党，中国共产党秉持着以人民为中心的发展思想，将人民的利益摆在首位。在党的领导下，实现民族富强、人民幸福是党的根本使命。为此，党始终关注人民群众的疾苦和期盼，努力解决人民群众的急难愁盼问题，推动共同富裕的实现。只有坚定站在人民立场上，才能真正做到为民造福、执政为民。因此，中国共产党始终坚定人民立场是其先进性的表现之一。 .	b	a	b	a	model_a	tie
中国式现代化是中国共产党领导的社会主义现代化。党的十八大以来,中国共产党不断深化认识,创立了习近平新时代中国特色社会主义思想,实现了马克思主义中国化时代化新的飞跃:健全党的领导制度体系,完善党中央重大决策部署落实机制,确保全党在政治立场、政治方向、政治原则、政治道路上同党中央保持高度一致:注重队伍建设,加强干部斗争精神和斗争本领养成,着力增强防风险、迎挑战、抗打压能力，带头当担作为，成功推进和拓展中国式现代化，取得了新时代十年的伟大成就。	结合材料,运用“坚持和加强党的全面领导”的知识,说明新时代应怎样坚持和加强党的全面领导,开创中国式现代化的新局面。	中国式现代化是中国共产党领导的社会主义现代化，同党中央保持高度一致，说明要坚持党中央集中统一领导，确保中国式现代化奋斗目标行稳致远。创立了习近平新时代中国特色社会主义思想，实现了马克思主义中国化时代化新的飞跃，说明要坚持用习近平新时代中国特色社会主义思想凝心铸魂，为开创中国式现代化新局面提供根本遵循。健全党的领导制度体系，完善党中央重大决策部署落实机制，说明要建立健全党的领导制度体系，为新时代中国式现代化的发展注入强劲动力。注重队伍建设，干部本领养成，带头担当作为，说明要着力建设堪当民族复兴重任的高素质干部队伍，团结带领全国各族人民开创中国式现代化的新局面。	新时代应当坚持和加强党的全面领导，首先要坚持和加强党中央集权统一，确保党中央的权威和统一领导。其次，要健全党的领导制度体系，完善党中央重大决策部署落实机制，使党的领导更加科学、民主和有效。同时，要坚持用习近平新时代特色社会主义思想凝心铸魂，引领全党不忘初心、牢记使命。注重队伍建设，加强干部精神和斗争本领养成，培养一支忠诚、干净、担当的高素质干部队伍。加强党的领导，增强党组织政治功能和组织功能，确保党始终成为中国特色社会主义事业的坚强领导核心。坚持全面从严治党，加强党风廉政建设，保持党的先进性和纯洁性。最后，确保党在政治立场、政治方向、政治原则、政治道路上同中央保持一致，以建党的政治建设为主线，加强党的领导，开创中国式现代化的新局面。	新时代应当毫不动摇地坚持党的全面领导，牢牢坚持党中央集中统一领导，健全党的领导制度，完善党中重大决策部署落实机制，确保全党在政治立场、政治方向、政治原则、政治道路上与党保持高度一致。要坚持全面从严治党，以党的政治建设为统领，坚持科学执政、民主执政、依法执政，将党的意识上升为国家意识，始终坚持维护领导核心的地位。同时，要充分发挥党员的先锋模范作用，注重队伍建设，加强敢于斗争精神，培养增强风险意识，迎接挑战、抵御打击的能力，带头担当、作出表率。只有这样，我们才能在新时代开创中国式现代化的新局面。	a	a	在新时代，坚持和加强党的全面领导是中国式现代化的核心。以下是几个方面的措施来实现这一目标： 1. 完善党的领导制度体系：党的十八大以来，中国共产党不断深化对领导制度的认识，并不断完善和创新制度，确保党的领导能够在各个领域得到有效实施。例如，建立了党的领导体系和国家治理体系相互衔接的机制，确保党的决策能够在各级政府和社会各界得到贯彻执行。 2. 加强党中央重大决策部署的落实机制：中国共产党注重党中央重大决策的有效落实，建立了相应的机制和流程，确保决策能够在各级党委和政府中得到正确理解和执行。例如，通过建立责任追究机制，确保决策责任明确，责任落实到位。 3. 强化党的组织力和凝聚力：党的领导需要强大的组织力和凝聚力。中国共产党通过加强党的建设，提高党员的政治素质和能力，确保党的领导能够在各级组织中得到有效实施。例如，通过开展党的学习教育，提高党员的理论水平和政治觉悟。 4. 加强队伍建设和干…	新时代应当坚持和加强党的全面领导，可以从以下几个方面着手： 首先，加强党的思想引领，推动习近平新时代中国特色社会主义思想深入人心，引导全党全国各族人民在思想上、政治上、行动上与党中央保持高度一致。 其次，加强党的组织建设，健全党的领导制度体系，严格执行党内法规，加强党风廉政建设，确保党始终成为坚强有力的核心领导力量。 再次，加强党的队伍建设，培养一支忠诚干净担当的干部队伍，提高干部的政治素养和业务能力，确保党的领导干部始终做到“两个维护”。 最后，加强党的作风建设，倡导党员干部要勇于担当、敢于斗争，增强党员的斗争精神和斗争本领，勇敢面对各种风险挑战，不断提升党的抗风险、迎挑战、抗打压的能力，推动中国式现代化不断向前发展。 通过以上措施，可以确保党的全面领导始终得以巩固和加强，为开创中国式现代化的新局面奠定坚实基础。 。	tie	b	a	tie	model_a	a
历史上，风沙、盐碱、内涝肆虐，兰考民生艰难、百姓贫苦。上世纪六十年代，“县委书记的好榜样”——焦裕禄依靠群众，开启治理“三害”的征程，改善了兰考自然环境，形成了“亲民爱民、艰苦奋斗、科学求实、迎难而上、无私奉献”的焦裕禄精神。2014 年，在党的群众路线教育实践活动中，习近平总书记选择兰考作为联系点，叮嘱当地干部要切实关心贫困群众，带领群众艰苦奋斗，早日脱贫致富。“改变兰考贫困的面貌，让百姓过上好日子。”兰考县委牢记总书记嘱托，把脱贫作为第一民生工程，提出了“三年脱贫，七年小康”的奋斗目标。兰考广大党员干部密切联系群众,深入调查研究,找到了制约经济发展的瓶颈,制定了切实可行的脱贫措施。在焦裕禄精神的鼓舞下，兰考人民团结奋斗，因地制宜，创造性地建立“公司+贫困户” “经营大户+贫困户”等模式,发展温室大棚种植、畜牧业、民族乐器制作等产业,打赢了艰苦卓绝的脱贫攻坚战。2017年,兰考在河南省…	弘扬焦裕禄精神对于打赢脱贫攻坚战具有重要意义,运用中华民族精神的知识并结合材料加以分析。	民族精神是实现中华民族伟大复兴的强大精神动力。焦裕禄精神是中华民族精神的生动体现，为打赢脱贫攻坚战提供了强大的精神力量；弘扬焦裕禄精神，能够树牢以人民为中心的发展思想，凝聚民心，激励斗志，迎难而上，无私奉献，因地制宜，精准扶贫脱贫。	①弘扬焦裕禄精神对于打赢脱贫攻坚战具有重要意义。爱国主义精神是中华民族精神的核心，推动着我们高举爱国主义旗帜，心怀国家大义，为脱贫事业贡献自己的力量。②伟大奋斗精神是焦裕禄在脱贫攻坚战中的精神支柱。他以不懈努力和奋斗精神，关心民生艰难，依靠群众共同奋斗，改善了兰考的自然环境。③伟大奉献精神是打赢脱贫攻坚战的动力。焦裕禄无私奉献，亲民爱民，为人民谋幸福，这种奉献精神激励着我们在脱贫攻坚的道路上不懈努力，共同创造更加美好的明天。	弘扬焦裕禄精神对于打赢脱贫攻坚战具有重要意义。如果一个国家或民族不重视优秀民族精神的传承与发展，就会失去文化创新的根基。中华民族精神作为中华民族的灵魂，是凝聚中国人民的内核。文化在认识和改造世界中起着重要作用。因此，只有通过弘扬焦裕禄精神等优秀民族精神，才能在脱贫攻坚战中汇聚起强大的精神力量，推动全民族团结一心，共同战胜贫困，实现全面建设小康社会的目标。	a	a	弘扬焦裕禄精神对于打赢脱贫攻坚战具有重要意义，体现在以下几个方面： 首先，焦裕禄精神强调“亲民爱民、艰苦奋斗、科学求实、迎难而上、无私奉献”，这些建设性精神对党员干部的工作态度和行为准则具有深远的影响。党员干部在脱贫攻坚战中，应当以焦裕禄为榜样，密切联系群众，深入调查研究，真正把群众的利益放在首位，切实解决群众的实际困难。 其次，焦裕禄精神鼓励党员干部依靠群众，通过群众的力量和智慧，解决问题。这在脱贫攻坚战中尤为重要。通过建立“公司+贫困户”、“经营大户+贫困户”等模式，兰考县委成功地发挥了群众的积极性和创造性，促进了产业发展和贫困人口的脱贫。 再次，焦裕禄精神强调科学求实，这对于制定切实可行的脱贫措施和解决制约经济发展的瓶颈至关重要。兰考县委在脱贫攻坚战中，通过深入调查研究，找到了制约经济发展的具体问题，并制定了相应的解决方案，有效地推动了经济发展和贫困人口的脱贫。 最后，焦裕禄精神的…	弘扬焦裕禄精神对于打赢脱贫攻坚战具有重要意义，因为焦裕禄精神体现了亲民爱民、艰苦奋斗、科学求实、迎难而上、无私奉献的价值观。这种精神激励着人们勇于面对困难，坚定信念，始终奋斗不止，为改变贫困面貌努力。在兰考的案例中，当地干部和群众秉承焦裕禄精神，找准症结，制定措施，创新模式，最终成功脱贫致富。这表明焦裕禄精神不仅是一种精神信仰，更是一种实践指南，能够指导我们在脱贫攻坚中勇于创新，不畏艰难，团结一心，达成脱贫目标。 结合材料中提到的兰考的情况，我们可以看到焦裕禄精神在脱贫攻坚中的具体体现。通过与群众密切联系，深入调查研究，兰考干部找到了脱贫的关键，并提出了“三年脱贫，七年小康”的奋斗目标。他们结合当地实际，创造性地建立了多种产业模式，取得了显著成效。这些做法都体现了焦裕禄精神中的艰苦奋斗、科学求实和迎难而上的品质。 因此，弘扬焦裕禄精神对于打赢脱贫攻坚战非常重要。只有在这种精神的指引下，我…	tie	a	a	tie	stud_a	a
我国 S 市属于温带大陆性气候，地势海拔高、降水量稀少、日照充足。近年来，s市不断探索在沙漠地区发展光伏产业，已初步形成了光伏十制造十观光旅游的上下游产业。走进中卫市沙漠光伏产业园，成千上万块蓝色光伏板，整齐地排列在黄沙之中，宛如在沙漠上覆盖了一片蓝色的海洋。如今“拔地而起”的光伏板上可以发电,板下可以种植作物,板间还能养殖,一片土地得到三重利用。光伏发的电,实现沙漠地区太阳能资源高效利用和沙漠变绿洲的双重收益。近年来,S市政府减费降税,大力扶持高新技术产业发展,与此同时,严厉打击企业不正当竞争行为,顺应消费市场变化,为企业高质量发展出谋划策。	结合材料二并运用经济生活知识,说明S市高质量发展的驱动因素。	第一、二、三产业融合发展，着力提升产业链供应链韧性，推动了产业结构的优化升级。坚持新发展理念，节约资源、保护环境、重视科技创新，优化产品供给的质量，自觉地推进绿色发展、循环发展、低碳发展的中国式现代化发展。科学的宏观调控维护良好的市场秩序，为企业纾困解难，优化资源配置，推动S市高质量发展。建设现代化产业体系，坚持把发展经济的着力点放在实体经济上，推进新型工业化发展道路。	S市的高质量发展得益于多方面的驱动因素。首先，市政府贯彻落实了创新驱动发展战略，大力扶持高新技术产业的发展，为经济发展提供了强大动力。其次，市政府通过减税降费等政策措施，优化了商业环境，规范了市场秩序，有效保障了企业的正常经营。第三，市政府严厉打击企业不正当竞争行为，维护了公平竞争的市场环境。第四，市政府实施新发展理念，推动经济增长，为企业高质量发展提供了政策支持和指导。最后，市政府关注实体经济发展，不断探索产业发展新路径，推动光伏产业形成了完整的产业链，为城市经济的现代化转型提供了有力支持。综上所述，S市高质量发展的驱动因素在于政府的政策支持和引导，以及市场和企业的共同努力。	S市高质量发展的驱动因素主要有四点。首先，S市贯彻落实新发展理念，促进经济的高质量发展。通过“按地而起”的光伏构建，实现了一片土地的多重利用，推动了经济的可持续发展。其次，加强供给侧结构性改革，优化产业结构，发展上下游产业，形成了“光伏+制造+观光旅游”的产业链，促进了产业的升级。第三，政府实行科学的宏观调控，通过货币政策促进产业发展，减税降费，大力扶持高新技术产业的发展。最后，政府加强对市场的监督，打击企业不正当竞争行为，为企业的健康发展提供良好的市场环境。这些因素共同推动了S市经济的高质量发展。	a	a	S市高质量发展的驱动因素主要体现在以下几个方面： 1. **资源优势的有效利用**：S市地处温带大陆性气候区，具有较高的日照时间和较少的降水量，这为发展光伏产业提供了良好的自然条件。通过在沙漠地区建设光伏产业园，S市成功将光伏板与农业相结合，实现了土地的三重利用，有效地将太阳能资源转化为电力，同时促进了沙漠地区的绿化。 2. **政策支持**：S市政府通过减费降税等措施大力扶持高新技术产业的发展，特别是光伏产业，这为企业提供了良好的政策环境，降低了生产成本，提高了企业的竞争力。 3. **市场导向的发展战略**：S市政府顺应消费市场的变化，为企业提供了高质量发展的方向。通过打击企业不正当竞争行为，保障了市场的公平竞争，促进了产业的健康发展。 4. **创新驱动**：S市在光伏产业的发展中不断探索新技术、新模式，例如在光伏板上种植作物和养殖，展现了S市在高新技术产业发展中的创新精神和能力。…	在S市高质量发展的过程中，有几个主要驱动因素。首先，政府减费降税、扶持高新技术产业发展以及打击不正当竞争行为等政策措施为企业提供了良好的发展环境和政策支持，激励了企业投入研发和创新，推动了产业升级和转型。其次，光伏产业的发展不仅提升了当地的经济效益，还实现了资源的高效利用和环境的改善，为S市的可持续发展注入了新动力。此外，在消费市场变化的背景下，S市政府积极为企业提供出谋划策，帮助企业适应市场需求，促进了企业的高质量发展。综合来看，政府支持政策、新兴产业发展以及市场需求变化是推动S市高质量发展的重要因素。 。	b	a	a	b	stud_a	a
习近平总书记强调：“守望相助、扶危济困是中华民族的传统美德”“支持志愿服务、慈善事业健康发展”。党的十八大以来，在以习近平同志为核心的党中央坚强领导下，我国制定实施慈善法,推动慈善组织有序发展,慈善事业取得长足进步,慈善力量在打赢脱贫攻坚战、全面建成小康社会、支持民生兜底保障和社会福利事业、助力新冠肺炎疫情防控等方面发挥了积极作用。2022年9月1日,由中华慈善总会组织开展的2021年度全国慈善会系统先进评选结果出炉。武汉伟鹏控股有限公司 2021 年度共捐款 6561 万元，表彰为“全国慈善会系统爱心企业”。伟鹏集团在董事长喻鹏的带领下，近五年累计捐款捐物1.7亿元。企业是慈善事业的重要主体。企业的慈善行为是企业自愿为社会及受益人提供无偿社会救助、援助。企业从社会获得商业利益,企业的慈善投入源于其商业利益,企业参与慈善事业，可以为国家、社会排忧解难，有利于全面建设小康社会，共同富裕，促…	结合材料,运用矛盾基本属性的知识分析企业做慈善和追求商业利益的关系。	斗争性和同一性是矛盾的两个基本属性。矛盾的斗争性是矛盾双方相互排斥、相互对立的属性。企业通过生产经营从社会获得商业利益，而做慈善则是一种社会责任，代表着付出，两者强调的内容不同。矛盾的同一性是指矛盾双方的相互依赖、相互贯通。企业做慈善与追求商业利益是相互依存、相辅相成的。企业的慈善投入源于其商业利益，企业追求商业利益为企业做慈善提供资金来源和物质保障，同时，企业做慈善能提高企业的知名度和公信度，为企业的发展提供机遇。矛盾双方既对立又统一，由此推动事物的运动、变化和发展。正确处理好追求商业利益和做慈善的关系有利于促进企业不断发展壮大，使企业在发展经济效益的同时，获得更好的社会效益。	企业在做慈善和追求商业利益之间存在着矛盾的双方属性。首先，作为矛盾的同一性之一，企业可以在追求利润的同时也承担社会责任，使经济效益和社会效益相互转化。其次，双方的斗争性体现在企业发展慈善事业可能会损失一部分利润，因此企业需要在慈善事业和商业利益之间进行权衡。最后，企业在发展慈善事业时可以通过同一性和斗争性的结合，促进社会和谐，实现共同富裕的目标，从而全面建设小康社会。	企业既要做慈善，又要追求商业利润，这两者在某种程度上是相互矛盾的。但是从另一个角度来看，企业做慈善也可以提高企业形象，从而间接地促进商业利润的增长。因此，企业在做慈善和追求商业利润之间存在着矛盾统一的关系。要正确看待这个问题，不能简单地用非此即彼的思维方式来看待。	b	b	企业做慈善和追求商业利益在表面上看似存在矛盾，但实际上它们之间存在着内在的联系和互补性。矛盾的基本属性告诉我们，矛盾是相对的、普遍的、多方面的、复杂的，并且矛盾的双方都有自己的积极性和动力。 在企业的发展过程中，追求商业利益是其基本目标和动力。企业通过创造价值、提供产品和服务来获取利润，这是企业存在和发展的基础。然而，随着社会的发展和人们对企业社会责任的认识加深，企业开始认识到其商业活动不仅仅是为了盈利，还应该对社会和环境产生积极影响。 企业做慈善可以被看作是企业社会责任的一种体现。通过慈善活动，企业不仅能够帮助解决社会问题，改善民生，还能够提升其品牌形象，增强社会信任和支持，从而在长远来看提高其商业竞争力。例如，武汉伟鹏控股有限公司的慈善行为不仅得到了社会的认可，也为其品牌增添了正面形象，可能在潜移默化中带来更多的商业机会。 因此，企业做慈善和追求商业利益之间的关系可以理解为相辅相成的…	企业做慈善和追求商业利益实际上是一个辩证统一的关系。从矛盾基本属性的角度来看，企业做慈善和追求商业利益之间存在着矛盾，即一方面企业需要追求商业利润来保证自身的发展和生存，另一方面企业又需要承担社会责任，做出一定的慈善行为。但是这两者并不是割裂的，而是相互促进、相互转化的关系。企业通过做好慈善可以提升其社会形象和公信力，进而吸引更多的消费者和投资者，从而实现更好的商业利益。同时，参与慈善事业也可以增强企业的社会责任感和使命感，使其更好地融入社会，符合社会发展的需要。因此，企业做慈善与追求商业利益并不矛盾，而是相辅相成的关系。 。	b	b	model_b	b	model_a	a
材料二 湿地保护是生态文明建设的重要内容,十九大以来,习近平总书记多次对湿地保护作出重要指示，党中央把湿地保护和修复纳入生态文明建设的战略部署。根据习近平总书记重要指示和党中央决策部署，2021年10月，全国人大常委会启动湿地保护法草案修订工作。草案审议和修订过程中,先后3次在全社会公开征求意见,收到了来自各个部门和人民群众意见和建议多达上千条。2021年12月,全国人民代表大会常务委员会通过《中华人民共和国湿地保护法》。2022年2月，全国人大常务委员会启动执法检查工作，检查组在全国积极开展调研,多次视察湿地保护、修复和利用工作。来自国家林草局2022年第一季度新闻发布会的数据显示,国家湿地公园有效保护了240万公顷湿地,带动区域经济增长500多亿元，约 90%的国家湿地公园向公众免费开放，成为人民群众共享的绿色空间和“绿水青山就是金山银山”理念的生动实践。目前，我国湿地保护率已经达到…	法治是国家治理体系和治理能力的重要依托。你为坚持在法治轨道上推进国家治理体系和治理能力现代化提出两条合理化建议。	坚持依法治国，把良法善治的要求贯穿到国家治理和社会治理全过程和各方面。要立足新发展阶段的新形势新挑战，强化法治思维、运用法治方式，推进国家治理体系和治理能力现代化。	一、坚持依法治国，提升政府的治理能力。二、开展法治活动，提升自身的治理能力。	1. 坚持依法治国，建立法制型政府，是推进国家治理体系和治理能力现代化的重要依托之一。因此，我们需进一步加强法治意识，加强法治宣传教育，确保各级政府及其工作人员依法行政，切实维护社会公平正义，保障人民合法权益。 2. 贯彻落实新发展理念，也是推进国家治理体系和治理能力现代化的关键举措。我们应积极探索创新发展路径，促进经济社会发展与生态环境保护相协调，推动高质量发展，实现经济持续健康发展。	b	b	在推进国家治理体系和治理能力现代化的过程中，坚持法治轨道至关重要。以下是两条合理化建议： 1. 加强法治教育和公民意识建设：为了确保法治的深入实施和广泛认同，需要在全社会推广法治教育，提高公民的法治意识和法律素养。通过学校教育、媒体宣传、社区活动等多种渠道，普及法律知识，增强公民对法律的尊重和遵守。同时，鼓励社会各界参与法治建设，形成社会共治的良好氛围。 2. 完善法律体系和法治保障机制：为了确保法治能够有效运行，需要不断完善法律体系，确保法律的前瞻性、系统性和科学性。同时，建立健全法治保障机制，包括独立的司法体系、有效的法律监督机制和强有力的执法力量。通过这些措施，可以确保法律的公正实施，维护社会公平正义，增强法治的权威性和稳定性。	首先，建议加强湿地保护法律法规的宣传和教育工作，提高全民对湿地保护法律的认知度和遵守度。通过开展普及法律知识的宣传活动，提升公众对湿地保护法的了解，增强公民的法治意识，促使广大群众自觉遵守法律法规，共同参与湿地保护工作。 其次，建议完善湿地保护法律体系，强化执法效能。加强湿地保护法的实施细则和配套法规的制定，规范湿地保护工作的程序和标准，提高执法的准确性和效率。同时，加大对违法湿地破坏行为的处罚力度，严厉打击违法行为，维护湿地生态环境的完整和稳定。	a	b	a	tie	stud_a	a
100年来,中国共产党带领全国人民为实现中华民族复兴的伟大梦想拔荆斩棘、不懈奋千,创造一个又一个人间奇迹。中国共产党始终坚定理想信念，牢记初心使命，与人民同呼吸共命运；始终坚持理论创新、与时俱进，特别是十八大以来，创立了习近平新时代中国特色社会主义思想,对新时代党和国家事业发展、对推进中华民族伟大复兴历史进程具有决定性意义；始终坚持解放思想、实事求是，把实践作为检验真理的唯一标准，探索出一条与我国国情相适应的中国特色社会主义道路;始终坚持勇于承认错误、纠正错误,不断提高自我完善、自我革新,提高执政能力和反腐防变能力。	结合材料,运用中国共产党的相关知识,说明中国共产党是如何带领中国人民创造让世界惊叹的人间奇迹。	坚持以人民为中心。坚持人民主体地位，坚持立党为公、执政为民，践行全心全意为人民服务的根本宗旨。始终走在时代前列。坚持解放思想，实事求是、与时俱进、求真务实，是中国共产党始终走在时代前列、永葆生机活力的法宝。坚持以习近平新时代中国特色社会主义思想为行动指南。坚持党对一切工作的领导。确保党始终总揽全局、协调各方。坚持党要管党、全面从严治党，不断加强党的自身建设。	中国共产党始终坚定理想信念，与人民同呼吸共命运。在中国共产党的领导下，中国人民创造了让世界惊叹的人间奇迹。中国共产党始终坚持解放思想实事求是，把实践作为检验真理的唯一标准。通过不断实践和探索，中国共产党带领人民找到了一条与我国国情相适应的中国特色社会主义道路。在这条道路上，中国共产党勇于承认错误，不断提高自我完善，自我革新。正是因为中国共产党始终与人民同呼吸共命运，坚持实事求是，不断革新自我，中国人民在中国共产党的领导下创造了让世界惊叹的人间奇迹。	中国共产党始终坚定理想信念，牢记初心使命，与人民共同呼吸共命运。在党的领导下，中国人民创造了让世界惊叹的人间奇迹。中国共产党始终坚持理论创新、与时俱进，特别是十八大以来，创立了习近平新时代中国特色社会主义思想，对新时代党和国家事业发展、对推进中华民族伟大复兴历史进程具有决定性意义。党始终坚持解放思想，实事求是，把实践作为检验真理的唯一标准，探索出一条与我国国情相适应的中国特色社会主义道路。党始终坚持勇于承认错误、纠正错误，不断提高自我完善、自我革新，提高执政能力和反腐能力。在中国共产党的坚强领导下，中国人民以更加昂扬的斗志和更加坚定的信心，开创了经济建设、改革开放、科技创新等各个领域的辉煌成就，为世界树立了一个充满活力和希望的现代化大国形象。	b	b	中国共产党是如何带领中国人民创造让世界惊叹的人间奇迹的，主要体现在以下几个方面： 1. 坚定理想信念和初心使命：中国共产党始终坚持马克思主义的基本原理，结合中国的实际情况，形成了中国特色社会主义理论体系。党的十八大以来，习近平新时代中国特色社会主义思想的提出，为指导新时代的发展提供了坚强的思想保证。党的领导层始终牢记初心使命，与人民群众同呼吸共命运，确保党的政策和行动始终与人民的根本利益相符合。 2. 理论创新与时俱进：中国共产党始终坚持理论创新，不断吸收和借鉴世界先进的科学文化成果，结合中国的实际情况，推动社会主义理论与中国实际相结合。习近平新时代中国特色社会主义思想的提出，是对马克思主义中国化的最新成果，对推动党和国家事业发展具有决定性意义。 3. 解放思想、实事求是：中国共产党始终坚持实事求是的原则，根据中国的国情和发展阶段，探索出一条符合中国国情的中国特色社会主义道路。党的领导层…	中国共产党在过去的100年里，始终坚持与人民同呼吸共命运，牢记初心使命，不断探索适合中国国情的发展道路。通过坚定理想信念，勇于创新，勇于承认错误并纠正错误，中国共产党不断提高自身执政能力，推动国家发展。特别是在习近平新时代中国特色社会主义思想的指引下，中国共产党不断引领中国人民创造人间奇迹。比如在经济领域，中国共产党实施改革开放政策，推动中国经济迅速崛起，取得了举世瞩目的成就；在减贫领域，中国共产党致力于消除贫困，使中国成为首个完成联合国千年发展目标的发展中国家；在环境保护领域，中国共产党采取积极措施治理环境污染，成为全球环保领域的重要力量。总的来说，中国共产党凭借其坚强领导力和人民群众的支持，共同创造了让世界惊叹的人间奇迹。	b	a	a	b	stud_a	a
小康是中华民族的千年梦想和夙愿。100年来，中国共产党团结带领中国人民顽强拼搏，几代人一以贯之、接续奋斗，从“小康之家”到“小康社会”，从“总体小康”到“全面小康”，从“全面建设”到“全面建成”，小康目标不断实现，小康梦想成为现实。2021 年 9 月 28 日，国务院新闻办公室发表《中国的全面小康》白皮书。白皮书指出，在一个底子薄、基础弱、国情复杂的大国，全面建成惠及十几亿人口的小康社会，极不平凡，极不容易,中国共产党和中国人民付出了长期艰辛努力。全面建成小康社会，中国人民过上了好日子，但还不富足，人民日益增长的美好生活需要和不平衡不充分的发展之间的矛盾仍然存在。中国共产党将团结带领人民，向着实现人的全面发展、全体人民共同富裕继续迈进。白皮书还指出、传承弘扬中华优秀传统文化。中华优秀传统文化创造性转化、创新性发展，焕发新的生机活力，延续了民族文化血脉，凝聚了民族精神，点亮了人们的小康生…	结合材料并运用唯物辩证法的发展观知识，说明我国全面小康的建设历程。	世界是永恒发展的，要用发展的观点看问题。从“小康之家”到“小康社会”，从“总体小康”到“全面小康”，从“全面建设”到“全面建成”，小康目标不断实现，小康梦想成为现实。事物的发展是从量变开始的，量变是质变的必要准备，质变是量变的必然结果。100年来，中国共产党团结带领中国人民顽强拼搏，几代人一以贯之、接续奋斗，小康梦想成为现实。事物发展的道路是曲折的，前途是光明的，要做好充分的思想准备，不断克服前进道路上的困难，勇敢地面对挫折与考验。全面建成惠及十几亿人口的小康社会，极不平凡，极不容易，中国共产党和中国人民付出了长期艰辛努力，终于实现建成全面小康社会。	用唯物辩证法的发展观来看，我国全面小康建设的历程是一个不断发展、不断探索的过程。党团结带领人民从追求“小康之家”到实现小康社会的伟大转变，从总体建设到全面建成，展现了党的领导力量和人民的奋斗精神。我们善于发现事物之间的联系，从个体到整体，从家庭到社会，再到全体人民的共同富裕，不断推动着全面小康目标的实现。同时，我们也深入具体问题，深刻分析国情，攻坚克难，逐一解决基础薄弱等问题，努力实现全体人民的全面发展。在党的坚强领导下，我们将继续向着实现人的全面发展和全体人民共同富裕的目标迈进，不断推动我国全面小康建设取得更大成就。	我国全面小康的建设历程是一个充满曲折但不断前进的过程。我们始终坚持以人民群众为主体，重视人民群众的力量，在他们的推动下不断取得进步。我们深知发展是事物的规律，因此不断努力、坚持不懈地奋斗，谱写着时代的辉煌篇章。我们始终以发展的眼光看问题，坚信事物是发展的，秉承着发展的态度，向着美好未来迈进。正是因为我们坚持不断创新，为发展注入动力，才使得我们的发展生机勃勃，实现了从建设到建成的目标。在这条道路上，我们矢志不渝，坚定地相信前途是光明的，梦想一定能够实现。	a	a	我国全面小康社会的建设历程，可以从以下几个阶段来理解： 1. 从“小康之家”到“小康社会”的转变：这是从个体到集体，从家庭到社会的转变。这个过程体现了唯物辩证法的发展观，即量变到质变的转变。从一个家庭的小康到整个社会的小康，体现了量的积累和扩展，最终达到质的飞跃。 2. 从“总体小康”到“全面小康”的提升：这是从广度到深度的转变。从“总体小康”到“全面小康”，意味着小康的目标不仅仅是经济的增长，而是全面提升人民的生活质量，包括教育、医疗、环境等多个方面。这体现了辩证法的统一性，即经济发展与社会发展的统一。 3. 从“全面建设”到“全面建成”的实现：这是从建设阶段到实现阶段的转变。这个过程中，中国共产党和中国人民付出了长期艰辛的努力，通过一系列的政策和措施，推动了社会主义现代化建设，实现了从全面建设到全面建成的转变。这体现了辩证法的否定性，即旧的东西被新的东西所否定，旧的建设阶段被新的实现…	根据材料所述，我国全面小康的建设历程可以从以下几个方面进行说明： 首先，全面小康的建设是一个历经曲折、不断奋斗的过程。在底子薄、基础弱的情况下，中国共产党团结带领人民艰苦奋斗，一代又一代人不懈努力，从“小康之家”逐步实现“小康社会”，再到“全面小康”，这是一个持续漫长的历程。在这个过程中，中国人民付出了长期的艰辛努力，战胜了各种困难和挑战。 其次，全面小康的建设是一个不断发展、不断完善的过程。虽然中国人民过上了好日子，但仍然存在着不平衡不充分的发展问题。人们的美好生活需要与发展之间的矛盾仍然存在。因此，中国共产党要团结带领人民，不断推进人的全面发展、全体人民共同富裕的目标，不断完善小康社会建设。 最后，全面小康的建设也是一个传承和创新相结合的过程。白皮书中提到了传承弘扬中华优秀传统文化，这些传统文化在创新中焕发新的生机活力，成为人们小康生活的一部分。同时，传统文化的传承也使得文化遗产更加…	b	a	a	tie	stud_a	a
坎多尔胡德是马尔代夫北部的较大岛屿，是经过五年时间、耗资数百万英镑而改造出来的。印度洋大地震引发了海啸后，坎多尔胡德一下子变成了“不适宜人类居住“的地方”。岛上的局面伤心地说: “我们毕生的心血都打了水漂。”实际上,早在人工造岛开始之前,这一项目就遭到了国际环保专家和国内有识之士的强烈反对。他们认为,人工造岛不仅不会改造好现有的环境,还有可能破坏原本就十分脆弱的生态系统,在遇到大灾时反而会成为破坏力量。	请运用规律的客观性的知识分析材料。	规律是事物运动过程中固有的本质的、必然的、稳定的联系。规律是普遍的，自然界也有其固有的规律。规律是客观的，是不以人的意志为转移的，它既不能被创造，也不能被消灭。发挥人的主观能动性，必须以尊重客观规律为基础，否则，人工造岛不仅不会改造好现有的环境，还可能会破坏原本就十分脆弱的生态系统，在遇到大灾时反而会成为破坏力量。人可以在认识和把握规律的基础上，预计事物的发展趋势和方向，指导实践活动；也可以改造或创造条件，限制某些规律发生破坏作用的范围，变害为利。	规律是客观存在的，不受人的意志左右，无法被创造或消灭。人们人工造岛在某种程度上违背了自然规律，未能实现人与自然和谐共处，未能符合规律的客观性。规律是固有、本质、必然和稳定的体现，人们尚未真正认识到规律的本质。	规律是客观的，不受个人意识的影响。马尔代夫修建坎多尔胡德时没有遵循自然规律，这将导致受到自然惩罚。规律是固有的，不能被创造或消灭。我们应该调查研究，寻找事物固有的规律，作为我们行动的依据。尽管物质的本质与规律不能违背，但人类可以认识和利用规律改造客观世界，促进发展。在自然界、人类社会和思维的发展中，规律是固有的。只有顺应规律变化的发展才能持续长久，逆行者必将被抛弃。	b	b	坎多尔胡德人工造岛项目的实施，反映出了一种人类对自然环境的干预和改造的尝试。从环境保护的角度来看，这样的项目往往会面临国际环保专家和国内有识之士的批评和反对。他们的担忧基于以下几个方面： 1. 环境破坏：人工造岛可能会破坏原有的生态系统，尤其是在海洋环境中，这样的干预可能会对海洋生物的栖息地和生存环境造成不利影响。 2. 脆弱的生态系统：马尔代夫这样的地区，生态系统通常非常脆弱，任何大规模的人为干预都可能导致不可预测的后果，包括对海洋环境的长期破坏。 3. 灾害风险：如同问题中提到的印度洋大地震和海啸，人工造岛可能在遇到自然灾害时，成为破坏力量，增加受灾风险。 4. 经济和社会成本：虽然人工造岛可能带来短期的经济收益，但长期来看，可能会导致环境成本的上升，包括维护成本、应对自然灾害的成本等。 因此，虽然坎多尔胡德人工造岛项目可能在短期内改善了岛屿的居住条件，但从环境保护和可持续发展的角度…	根据生态学的规律，自然生态系统是一个复杂的相互作用网络，各种生物和非生物因素相互依存、相互制约。人工造岛可能会破坏原有的生态系统平衡，导致生物多样性减少，生态环境恶化。此外，人工造岛还可能会改变海洋环境，对当地的海洋生物造成影响。因此，在面对自然灾害时，人工造岛可能会变成一个弱点，无法承受灾害带来的冲击。 在坎多尔胡德岛的案例中，人工造岛项目在面临海啸等自然灾害时无法承受考验，一旦发生灾害，可能会带来更大的破坏。因此，应当认真考虑生态系统的规律，避免过度干预自然环境，保护现有的生态系统，才能更好地保护自己在自然灾害中的安全。 。	b	b	b	tie	model_a	a
阅读材料，完成下列要求。近年来，我国在互联网、大数据、人工智能等新兴技术的推动下，数字经济发展迅速。数字经济以数字技术创新为核心，以数据资源为关键要素，以现代信息网络为重要载体，为经济社会发展提供了新的强大动力。但与此同时，数字技术的快速发展也带来了一系列挑战，如数据安全、个人信息保护、网络监管等问题。为推动我国数字经济健康发展，政府采取了一系列措施，包括加强数字基础设施建设、优化数字营商环境、完善数字经济法律法规体系等。这些措施的实施，为数字经济的发展提供了有力保障。	1. 简述数字经济对我国经济社会发展的推动作用。	推动经济转型升级，提高经济发展的质量和效益，促进产业结构优化升级，培育新的经济增长点，提升就业水平和劳动力素质，为就业市场注入新的活力，加强国际经济合作与竞争，提升我国经济在全球市场中的地位。	数字经济对我国经济社会发展起到了推动作用。它帮助促进经济结构调整，优化产业结构，推动转型升级，提高经济发展的质量和效益。数字经济也有助于提升就业水平和劳动力素质，为就业市场注入新的活力。此外，数字经济还加强了国际经济合作与竞争，提升了我国经济在全球市场中的地位。	数字经济对我国经济社会发展起到了推动作用。它加快了科技创新和人才培养，提升了国家竞争力，实现了经济转型升级，增强了可持续发展能力。数字经济还提升了就业水平和人才素质，为国家社会注入了新的活力。此外，数字经济还增强了国际经济合作与竞争力，推动我国经济在全球市场中的地位。	a	a	数字经济通过引领数字技术创新、数据资源的有效利用以及现代信息网络的广泛应用，对我国经济社会发展产生了深远的影响。首先，数字经济促进了经济增长，通过电子商务、在线支付等方式，提高了市场的透明度和效率，增强了消费者和企业的互动能力。其次，数字经济推动了产业结构的优化升级，鼓励了新兴产业的发展，如云计算、大数据分析、人工智能等，这些产业不仅创造了新的就业机会，还提高了产业的竞争力。再次，数字经济促进了社会服务的数字化，例如教育、医疗、公共服务等领域的在线服务，使得更多人能够享受到便捷、高效的服务。此外，数字经济还增强了国家治理能力，通过大数据分析和人工智能技术，政府能够更精准地了解民众需求，优化资源配置，提高公共服务的质量和效率。	数字经济以数字技术创新为核心，为我国经济社会发展提供了新的强大动力。通过数字经济的发展，我国可以实现经济结构的升级和转型，提高生产效率和质量，推动传统产业向数字化、智能化转型。数字经济还可以促进创新创业，推动新兴产业的发展，为就业和经济增长提供新的动力。此外，数字经济还可以促进信息化建设、智能化发展，提升我国的国际竞争力。总的来说，数字经济对我国经济社会发展起到了重要的推动作用。	b	a	a	b	stud_a	a
阅读材料，完成下列要求。近年来，我国在互联网、大数据、人工智能等新兴技术的推动下，数字经济发展迅速。数字经济以数字技术创新为核心，以数据资源为关键要素，以现代信息网络为重要载体，为经济社会发展提供了新的强大动力。但与此同时，数字技术的快速发展也带来了一系列挑战，如数据安全、个人信息保护、网络监管等问题。为推动我国数字经济健康发展，政府采取了一系列措施，包括加强数字基础设施建设、优化数字营商环境、完善数字经济法律法规体系等。这些措施的实施，为数字经济的发展提供了有力保障。	2. 分析政府加强数字基础设施建设对数字经济发展的重要意义。	为数字经济提供强有力的技术支持和可靠的基础设施保障，以降低数字经济发展成本，提高发展效率，促进数字经济和实体经济深度融合，推动经济高质量发展，提升数字经济的国际竞争力，并促进全球数字经济的交流和合作。	加强政府数字基础设施建设对数字经济发展具有重要意义。这样做可以为数字经济提供稳健的技术支持和完善的基础设施保障，同时强调了绿色环境保护和可持续发展。这种举措有助于实现经济、社会和环境的平衡协调发展，并能降低数字经济发展的成本，提高效率。通过国际合作，共享资源、技术和经验，可以推动数字经济的发展，实现更为强大的效应。	加强数字基础设施建设对数字经济发展具有重要意义，可以为数字经济提供稳固的技术支持和基础设施，从而保障推动经济持续健康发展，实现高质量经济增长。此外，加强数字基础设施建设也有利于通过国际合作增加资源、技术和知识的交流与合作，提高全球综合应对气候变化和全球性问题的能力和效率。	a	a	政府加强数字基础设施建设对数字经济发展的重要意义在于它为数字经济的健康增长提供了坚实的技术支撑和基础条件。以下是几个方面的分析： 1. 提升网络连接速度和质量：高效的网络连接是数字经济发展的关键。政府投资于高速互联网基础设施的建设，如5G网络、光纤网络等，可以显著提高网络速度和稳定性，满足数字经济对高速数据传输的需求。例如，5G技术的应用可以支持高延迟敏感的应用，如远程医疗、虚拟现实等，这些应用对于提升生活质量和经济效率都至关重要。 2. 增强数据处理能力：数字经济依赖于大量数据的处理和分析。政府加强数据中心和云计算基础设施的建设，可以提高数据处理的速度和效率。这样，企业和个人就可以更快地获取和分析数据，从而做出更精准的决策。 3. 促进数字创新：良好的数字基础设施可以吸引更多的数字创新项目和企业。例如，高质量的网络连接可以支持在线教育、远程工作等模式的发展，这些模式可以促进知识和技能的…	政府加强数字基础设施建设对数字经济发展具有重要意义。首先，数字基础设施是支撑数字经济发展的基础设施，包括网络基础设施、数据中心、云计算等。只有建设完善的数字基础设施，才能更好地支持数字技术的创新应用，促进数字经济的发展。其次，数字基础设施的建设可以提高信息传输和数据处理的效率，降低信息传输成本，推动数字经济的高效运行。另外，数字基础设施建设还可以促进各行业的数字化转型，提升整体经济的竞争力。总的来说，政府加强数字基础设施建设可以为数字经济发展提供坚实的基础和支撑。 举例来说，中国政府在近年来大力推动5G网络建设，加快数字基础设施建设的步伐。5G网络的高速、大容量、低时延等特点，将极大地促进数字经济发展，推动各行业的数字化转型和升级。	b	a	a	b	stud_a	a
阅读材料，完成下列要求。近年来，我国在互联网、大数据、人工智能等新兴技术的推动下，数字经济发展迅速。数字经济以数字技术创新为核心，以数据资源为关键要素，以现代信息网络为重要载体，为经济社会发展提供了新的强大动力。但与此同时，数字技术的快速发展也带来了一系列挑战，如数据安全、个人信息保护、网络监管等问题。为推动我国数字经济健康发展，政府采取了一系列措施，包括加强数字基础设施建设、优化数字营商环境、完善数字经济法律法规体系等。这些措施的实施，为数字经济的发展提供了有力保障。	3. 结合材料，谈谈政府在完善数字经济法律法规体系方面应采取的措施。	制定和完善数字经济相关的法律法规，为数字经济的发展提供法律保障，加强数字经济的监管，保障市场公平竞争和消费者权益，建立健全的数据安全和个人信息保护机制，维护数据安全和个人隐私权益，推动数字经济与其他领域的协同发展，实现数字经济与其他产业的深度融合。	为了完善数字经济的法律法规体系，政府可以采取一些措施。首先，需要加强数据开放共享法规体系，确保政府在数据处理中遵守法律规定，为数据安全提供法律保障。其次，政府应该加强监管，维护市场的公平竞争和消费者权益，防止数据滥用和侵犯个人隐私。同时，建立健全的数据安全和个人信息保护机制，保障数据安全和个人隐私权益。最后，政府还应推动数字经济与其他领域的协同发展，实现数字经济与其他产业的深度融合，促进经济的持续发展和创新。	为了推动数字经济的发展，政府应当采取一系列措施来完善数字经济法律法规体系。首先，需要制定和完善数字经济相关法律法规，为数字经济的发展提供法律保障，并且建立数据开放共享法规体系，以确保数据安全并为政府依法行政提供法律支持。其次，政府还应加强对数字经济的监管，以保障市场的公平竞争和消费者权益。在经济发展过程中，政府需要平衡效率和公平的关系，实现二者的统一。此外，建立健全的数据安全和个人信息保护机制也是必不可少的，以维护数据安全和个人隐私权益。政府在市场调节中扮演着重要角色，通过对违规企业进行严厉处罚，可以规范市场秩序，维护公平竞争。	a	a	政府在完善数字经济法律法规体系方面，应采取以下措施： 1. **加强数据保护法律法规**：制定和完善数据保护法律法规，明确个人数据的收集、使用和保护规则，确保个人隐私权益不受侵犯。例如，中国已经出台了《个人信息保护法》，旨在规范个人信息处理活动，保护个人信息安全。 2. **完善知识产权保护**：加强对数字内容的知识产权保护，防止版权、商标、专利等知识产权的侵权行为。例如，通过数字版权管理系统（如版权管理系统DMCA）来保护数字作品的版权。 3. **建立网络安全法规体系**：制定和完善网络安全法规，防范网络攻击和数据泄露，确保国家安全和社会稳定。例如，中国的《网络安全法》规定了网络安全的基本原则和要求，要求网络运营者加强网络安全管理。 4. **规范电子商务活动**：出台相关法律法规，规范电子商务的发展，保护消费者权益，防范网络欺诈等不正当商业行为。例如，中国的《电子商务法》明确了电子…	政府在完善数字经济法律法规体系方面应采取的措施包括但不限于以下几点： 首先，要及时跟进新兴技术的发展，不断更新法律法规，确保法律法规与技术发展同步。例如，针对人工智能、大数据等新技术的应用，可以制定相应的监管规定，保障数据安全和个人信息保护。 其次，要加强对数字经济领域的监管力度，建立健全监管机制，加大执法力度，严惩违法行为。这可以通过加强对网络监管、数据安全的监督，规范数字经济市场秩序，保护消费者权益。 另外，政府还应该加强对数字经济产业的支持和引导，通过政策扶持，促进数字经济行业的健康发展。比如，鼓励企业加大数字化转型的力度，推动数字经济的蓬勃发展。 总的来说，政府在完善数字经济法律法规体系方面应该综合运用立法、监管、支持等手段，全面提升数字经济法律法规的适应性和有效性，以促进数字经济的健康发展。	b	a	a	b	stud_a	a
