# Supplementary material
Source: ML conference proceedings conference paper supplement (https://openreview.net/forum?id=R7pR4dzgAV)
Supplement: supplementary_material [file geoen.xlsx]

## Sheet: Sheet1
context	Question	Concise_Reference	refined_student_answer_a	refined_student_answer_b	student_answer_a vs student_answer_b	student_answer_a vs student_answer_b_new	model_answer_a	model_answer_b	model_answer_a vs model_answer_b	stud_answer_a vs model_answer_a	stud_answer_a vs model_answer_b	model_answer_a vs model_answer_b_new	stud_answer_a vs model_answer_a_new	stud_answer_a vs model_answer_b_new
据四川省地震局官方消息，四川地区已实现震后5~7秒发送预警信息、震中位置偏差控制在10千米以内、中强地震震级偏差平均0.5级的精准测定,并且在4级及以上地震发生后,系统10分钟内即可生成地震烈度分布图,实现了仪器烈度图从无到有的突破,烈度速报精度达10~15千米。下图为地球圈层结构图。	说明利用地震波判断地球内部圈层物质状态的依据。	由于纵波可以通过固体、液体、气体传播，而横波只能通过固体传播，因此可以根据横波和纵波能否通过各圈层以及波速变化推断地球内部各圈层的物质状态。	地震波随下降深度而传播速度急剧加快，但通过D界面时速度增长变缓，速度继续逐步增长。并逐渐变缓速度增长速率。这种速度变化表明地球内部存在不同性质的圈层物质，因为不同物质密度和弹性模量会影响地震波的传播速度。通过分析地震波在地球内部的传播特点，可以推断出地球内部各圈层的物质状态和性质。因此，利用地震波可以帮助科学家们更好地了解地球内部的结构和组成。	地震波在地球内部传播时，会经过不同的圈层，其中莫霍面是一个重要的界面。当地震波通过莫霍面时，波速通常不会有明显的变化。这种现象可以作为判断地球内部圈层物质状态的依据之一。	a	stud_a	利用地震波判断地球内部圈层物质状态的依据主要基于地震波的传播速度和特性。地震波分为P波（压缩波）和S波（剪切波），它们在不同地球圈层中传播的速度和行为有所不同。 P波是压缩波，它可以在固体、液体和气体中传播，因此它可以穿过地球的各个圈层。P波在不同圈层中的传播速度不同，例如在岩石圈中约为6-8千米/秒，在地幔中约为8-14千米/秒，而在核心中约为14千米/秒。通过测量P波的传播速度，可以推断出它穿过的圈层。 S波只能在固体中传播，因此它不能穿过地幔和液态的外核。S波的速度在岩石圈中约为4-5千米/秒，而在地幔中由于其流动性，它的传播速度会受到影响，变得不一致。通过观察S波的传播特性，可以了解岩石圈的结构和地幔的流动状态。 此外，地震波的衰减和波形的变化也可以提供关于地球内部圈层物质状态的信息。例如，地震波在穿过不同圈层时会遇到不同的阻力，导致其能量减少，从而影响到波形的强度和清晰度。 综…	利用地震波判断地球内部圈层物质状态的依据主要包括地震波的传播速度和路径的变化。地震波在不同圈层中传播时会受到不同密度、温度和化学成分等因素的影响，从而导致传播速度和路径的变化。通过观测地震波的传播速度和路径变化，可以推断地球内部圈层的物质状态，比如地幔的结构和性质等。例如，地震波在通过地幔时传播速度会有所减慢，这种减慢的速度可以告诉我们地幔的密度和温度情况。	a	b	tie	model_a	model_a	stud_a
读我国长江流域及甲地景观、乙地放大图,完成下列问题。	分析长江口地段多沙洲的自然原因。	河流径流量大，携带泥沙量大；位于河流入海口，地势低平，流速缓慢，以堆积作用为主，泥沙大量堆积；地处河海交界地带,海潮的顶托使堆积作用增强,在河口地段形成众多的沙洲。	长江口地段多沙洲的自然原因主要是由于长江长期的冲刷和侵蚀作用，导致河床上沉积了大量的沙粒。随着地壳抬升和其他地质作用的影响，这些沙粒最终逐渐堆积形成了略高于水面的小岛，最终形成了长江口地段众多的沙洲。	长江口地段多沙洲是因为长江口地段高低差大，形成了多个“三角洲”，被人们称为“沙洲”。这些沙洲实质上是由细颗粒物堆积而成的。	a	stud_a	长江口地段多沙洲的自然原因主要可以归结为以下几点： 1. 长江水力作用：长江流域内水力强大，特别是在长江口这一区域，水流速度快，能带动大量的泥沙被运输。这些泥沙在流经长江口时，由于水流速度的减慢和方向的转变，很难继续被长江水流带走，因此在长江口形成了大量的沙洲。 2. 海水与淡水混合：长江口处，淡水与海水混合，形成了复杂的水流动力学环境。这种混合作用会导致水流的速度和方向发生变化，这些变化也会影响到泥沙的沉积和分布，从而形成沙洲。 3. 地形结构：长江口地段的地形结构复杂，包括沙洲、浅滩、沙洲群等，这些地形结构的存在会影响到水流的流动，导致水流在特定区域的速度减慢，从而促进了泥沙的沉积。 4. 长期的自然作用：长江口沙洲的形成是一个长期的自然过程，受到风、潮、潮汐、长江水流等多种自然因素的共同作用。这些自然因素的长期作用，导致了沙洲的形成和演变。 举例来说，长江口的沙洲群，如崇明岛、崇明…	长江口地段多沙洲的自然原因主要有以下几个方面：首先，长江是我国第一大河流，携带了大量的泥沙从上游冲刷而来，在长江口地段遇到海水的潮汐作用，会形成沉积物，逐渐堆积形成沙洲。其次，长江口地段处于江河与海洋的交汇处，水流速度减慢，泥沙沉积的机会增加，也促进了沙洲的形成。另外，长江口地段的地形地貌也对沙洲的形成起到了一定的影响，比如海浪、潮汐等自然力量会影响沙洲的形成和演变。 举例来说，长江口地段的崇明岛就是一个典型的多沙洲地区，由于长期受长江泥沙的冲击和海水的潮汐作用，崇明岛逐渐形成并不断扩大。这些因素共同作用，导致长江口地段出现了多沙洲的自然现象。	b	a	b	model_b	stud_a	stud_a
第七次全国人口普查结果显示，全国各省市城市人口增长率差异较大。	描述江苏省人口增长率空间分布特征	人口增长率的空间分布不均衡，总体上呈正增长。大多数城市，如苏州，人口增长率为正且增长幅度较大。然而，盐城、淮安、泰州等城市的人口增长率为负，其中盐城的降幅最为显著。	江苏省人口增长率空间分布特征表现为整体不均衡，北部地区人口较少，南部地区人口较多。其中，苏州市人口增长率最快，而盐城市人口出现负增长。	江苏省人口增长率空间分布特征主要集中在经济发达地区，尤其是知名度高的城市。	a	stud_a	江苏省的人口增长率空间分布特征在第七次全国人口普查中表现出一定的区域差异。根据普查数据，江苏省的城市人口增长率在不同地区有所不同，这主要受多种因素影响，包括经济发展水平、城市规划政策、生育政策等。 在江苏省内，沿海城市如南京、苏州、无锡等地的人口增长率相对较高。这些城市经济发展迅速，产业结构优化，吸引了大量的外来人口和人才，促进了人口的自然增长和移民增长。例如，南京作为省会城市，拥有较为完善的公共服务设施和较高的生活质量，吸引了众多人才和家庭迁入，导致人口增长率较高。 相比之下，内陆地区和部分中小城市的人口增长率则较低。这些地区可能面临着人口老龄化的趋势，自然增长率下降，外来人口流入较少。同时，由于经济发展水平和产业结构的限制，部分地区的人口流失问题也比较严重。 此外，江苏省在实施生育政策方面也有一定的影响。随着国家出台的一系列支持生育政策，江苏省内部分地区的生育率有所上升，这也对人口增…	江苏省人口增长率空间分布特征主要表现为沿海地区人口增长率较高，而内陆地区人口增长率相对较低。这是因为江苏省沿海地区经济发展较快，吸引了大量外来人口，特别是一些重要的经济中心城市如南京、苏州、无锡等人口密集地区，人口增长迅速；而内陆地区由于发展相对滞后，吸引力较弱，人口增长相对缓慢。例如，苏州和南京作为江苏省的两个重要城市，人口增长率较高，而在淮安、盐城等内陆城市，人口增长率相对较低。	b	a	a	model_b	stud_a	stud_a
第七次全国人口普查结果显示，全国各省市城市人口增长率差异较大。	推测盐城等三市人口增长率为负值的主要原因	盐城等三市经济增长缓慢，吸引外来人口的能力较低；相对地，其他区域经济增长较快，就业机会丰富，导致盐城等市的居民外出务工或经商的人数增多。此外，省内良好的交通条件也方便了人口的流动。	盐城等三市人口增长率为负值的主要原因可能有四个方面：经济发展水平相对落后、科技发展较低、资源枯竭以及城镇化程度相对较低。	三市的经济发展不如其他市，导致人口大规模迁移到其他市。其他市实施了更加开放的政策，吸引了大量人口。	b	stud_b	盐城等三市人口增长率为负值的主要原因可能包括： 1. 人口自然减少：随着老龄化的加剧，老年人口比例增加，相对较少的年轻人口群体导致生育率下降，进而影响人口的自然增长。 2. 人口流失：由于经济发展不均衡、就业机会有限、教育资源不足等因素，部分年轻人口选择外迁寻求更好的生活和工作机会，导致本地人口流失。 3. 人口迁入不足：相对于其他地区，盐城等三市可能在吸引人口迁入方面存在不足，可能是因为缺乏吸引力（如高薪职位、优质教育资源、医疗服务等）或者政策环境不利于人口流入。 4. 政策因素：可能存在的政策因素，如户籍制度、教育政策、住房政策等，可能对人口流动产生影响，限制了人口的迁入和居住。 5. 经济发展：经济发展水平较低，可能导致就业机会有限，生活成本较高，影响了人口的居住和生育意愿。 举例来说，如果盐城等三市的经济发展水平较低，教育资源和就业机会有限，可能会导致年轻人口选择外迁，进而导致本…	盐城等三市人口增长率为负值的主要原因可能包括以下几个方面： 1. 经济发展不平衡：盐城等三市可能面临经济结构调整和产业转型的困难，导致就业机会减少，人口外流或者迁出率增加，从而导致人口增长率为负值。 2. 地理位置不利：盐城等三市可能地理位置偏远，交通不便，基础设施建设滞后，吸引力不足，使得人口流入不足，人口增长受限。 3. 自然环境因素：盐城等三市可能面临自然资源匮乏、生态环境恶化等问题，影响当地生活质量和发展前景，导致人口减少或者外流。 总的来说，盐城等三市人口增长率为负值可能是多种因素综合作用的结果，需要通过政策支持和发展措施来解决。	a	b	tie	model_a	model_a	model_b
第七次全国人口普查结果显示，全国各省市城市人口增长率差异较大。	说出大量人口迁人对苏州产生的影响	该现象的有利影响包括缓解劳动力短缺状况、促进第二产业和王产业的发展，从而带动经济繁荣，并有助于不同地区间的文化交流。不利影响则包括给当地带来的就业压力、可能对社会治安的影响、资源消耗的增加、污染的加剧以及环境压力的增大。	大量人口迁入苏州，对当地产生了多方面的影响：首先，扩大了就业规模，带来了大量劳动力，缓解了人口老龄化带来的劳动力不足问题；其次，加快了城市经济的发展，增加了当地的就业压力和竞争力；另外，也容易造成交通堵塞，带来了住房紧张问题。	积极影响包括劳动力充沛，推动城市建设和经济发展；大量人才涌入，为发展新产业注入活力；人口增多，转向发展第二和第三产业。消极影响则包括人口增多导致就业率下降和生计压力增加；增大城市压力；污染环境，导致城市的卫生环境变差。	b	stud_b	大量人口迁入对苏州产生了多方面的影响： 1. 经济发展：人口迁入通常意味着更多的劳动力和消费者，这对于苏州的经济发展具有积极作用。例如，苏州的制造业、服务业和房地产市场都受益于人口的增加，企业可以从中获得更多的市场需求和潜在的客户。 2. 城市规划与基础设施：随着人口的增加，城市规划和基础设施建设变得更加重要。苏州需要扩建或升级交通网络、教育设施、医疗服务和住房等，以满足新迁入人口的需求。 3. 文化多样性：人口的流动带来了文化的多样性，新迁入的居民可能带来了不同的文化习俗和生活方式，这有助于丰富苏州的文化氛围。同时，这也可能导致一些文化冲突和适应问题。 4. 环境压力：人口的增加会对苏州的环境产生压力，包括资源消耗、环境污染和生态破坏等。因此，需要加强环境保护和可持续发展的措施，以减轻人口增长对环境的影响。 5. 社会服务与福利：随着人口的增加，社会服务和福利体系也需要相应地扩展和改善…	大量人口迁入苏州可能会对该城市产生多方面的影响。首先，人口的增加会带动苏州经济的发展，促进市场的繁荣。随着更多人口的涌入，苏州的消费市场将扩大，各种商业活动也会更加活跃。其次，人口迁入可能会加剧城市的交通拥堵和环境污染问题，对城市基础设施和环境保护提出更高要求。此外，人口迁入也会对苏州的社会结构和文化风貌产生影响，可能会带来新的社会问题和文化冲突。 举例来说，苏州的人口迁入增加可能会导致房价上涨，给当地居民的生活带来一定压力。同时，新迁入的人口可能会带来不同的生活习惯和文化背景，对当地社会风气和文化传统造成影响。 总的来说，大量人口迁入对苏州的影响是一个复杂而多元化的过程，需要政府和社会各界共同努力来引导和调控，以实现人口迁入对城市发展的积极影响，同时最大程度地减少负面影响。 。	a	b	b	model_a	model_a	model_b
西藏地区城镇分布	描述西藏地区主要城镇分布特征。	城镇主要分布在该区域的东南部，而整体分布显示东南部城镇较多，西北部较少。此外，城镇主要沿河流，尤其是河谷地区分布。	主要的城镇分布特征是集中在西藏地区的主要河流附近，特别是主要分布在东南部的河谷地区。	在西藏地区，主要的城镇分布特征是集中在东南部。	a	stud_a	西藏地区的城镇分布主要集中在河谷平原和盆地地区，这些地区地形较为平坦，气候条件较为适宜。西藏自治区的主要城镇包括拉萨市、昌都市、林芝市、山南市、那曲市、日喀则市等。 拉萨市是西藏自治区的政治、文化、经济和交通中心，位于藏北的拉萨河平原上，是西藏最大的城市。昌都市位于西藏的南缘，是一个重要的交通枢纽和商贸中心。林芝市位于西藏东南部，是一个著名的旅游城市，以其美丽的自然风光和宗教文化而闻名。山南市位于西藏中部，是一个重要的宗教中心，拥有众多的寺庙和文化遗产。那曲市位于西藏北部，是一个重要的农业生产基地。日喀则市位于西藏南部，是一个重要的宗教中心和文化遗产地。 西藏的城镇分布特征是以拉萨市为中心，向四周辐射，形成了一个以城市为核心，周边有农村和牧区的格局。这些城镇不仅是政治、经济和文化的中心，也是连接西藏与周边地区的重要门户。	西藏地区主要城镇分布特征是呈现集中分布的特点。西藏地区的主要城镇包括拉萨、日喀则、昌都、林芝、山南等。这些城镇大多集中在河流流域、山间盆地和高原湖泊周围，地理位置优越，交通便利。同时，西藏地区的城镇多数位于海拔较高的地区，如拉萨的海拔就达到了3650米，因此也具有高原气候特点。 举例来说，拉萨作为西藏的首府和政治、经济、文化中心，位于拉萨河畔的拉萨河谷地带，是西藏地区最大的城市，也是西藏自治区政治、经济、文化和交通中心。 总的来说，西藏地区主要城镇分布特征是集中在地理位置优越的河流流域、山间盆地和高原湖泊周围，同时大多位于海拔较高的地区，具有高原气候特点。 .	b	a	a	model_b	stud_a	stud_a
传统民居可以反映乡村聚落与地理环境的关系，同样也受当地地域文化的影响。海草房是以厚石砌墙，屋顶呈 50。角的“人”字坡形，用含有大量卤盐和胶质的海草覆盖，外面紧绷着渔网;晾房一般是长方形格局,墙壁用土块砌成,留有许多方形花孔,在屋内设置挂架,以挂晾葡萄	指出海草房其上覆盖渔网的主要目的	采取措施减少海风对屋顶海草的吹扫、减弱飞鸟和走兽对屋顶的破坏、以及削弱流水等外力对海草屋顶的侵蚀。	1. 紧绷渔网覆盖在海草房上，可以减少海草水分的散失，实现降温效果。 2. 渔网覆盖在房顶上可以有效减少冬天热量的散失，达到保温效果。 3. 这种覆盖方式可以实现冬暖夏凉的效果。	海草房上覆盖渔网的主要目的有两个：一是为了方便晾晒渔网，便于渔猎；二是防止海草被风吹走。	b	stud_a	海草房其上覆盖的渔网主要目的是为了提供额外的保护和维护。海草本身含有大量的卤盐和胶质，这些物质有助于防水和隔热，同时海草也具有很好的保湿性，可以保持屋顶的湿度，减少屋内的温度变化，从而提供一个更加舒适的居住环境。 覆盖渔网的作用是进一步加强屋顶的防护。渔网可以阻挡强风和雨水，减少屋顶受损的风险。同时，渔网也可以起到一定的隔热和保温作用，帮助保持屋内的温度稳定。这种建筑技术在海岛或沿海地区非常常见，因为它能够有效地利用当地的资源，并且适应了当地的气候条件。	海草房上覆盖渔网的主要目的是为了防止海草被风吹走，同时也可以起到防水、保温和防止小动物侵入的作用。此外，渔网还可以增加房屋的结构稳定性，使海草覆盖更加牢固。在某些地区，渔网还可以用于捕捉空中漂浮的食物，起到捕食昆虫的作用。 。	b	b	b	model_b	model_a	model_b
传统民居可以反映乡村聚落与地理环境的关系，同样也受当地地域文化的影响。海草房是以厚石砌墙，屋顶呈 50度角的“人”字坡形，用含有大量卤盐和胶质的海草覆盖，外面紧绷着渔网;晾房一般是长方形格局,墙壁用土块砌成,留有许多方形花孔,在屋内设置挂架,以挂晾葡萄	比较雨巷和晾房所在区域房屋屋脊的坡度大小，并说明原因	雨巷所处区域的坡度大于晾房，这是因为雨巷地区夏季降水较多，为了加快排水速度，一般会设计较大的屋脊坡度；相比之下，晾房通常位于西北地区，该地区降水较少，因此屋脊坡度较小。	雨巷区域的房屋屋脊坡度较大，主要是因为该地区降水量大，需要较大的坡度来排放屋顶上的雨水。相比之下，晾房地区较干旱少雨，因此无需设置较大的坡度。此外，晾房地区以水果干为特色，需要用平坦的区域使得水果直面阳光，便于晾晒。	雨巷屋脊的坡度较小，而晾房屋脊的坡度较大。这是因为雨巷需要将雨水迅速引流到地面，而晾房则需要一个平坦的屋顶来晾晒农作物。	a	stud_a	雨巷和晾房所在区域房屋的屋脊坡度大小可能会有所不同，这主要取决于当地的气候条件和建筑传统。 雨巷通常位于城市的老城区，房屋的设计可能更多地受到历史和文化的影响。屋脊的坡度可能会比较小，因为在过去，屋顶的坡度主要是为了防雨和防雪。例如，在中国的传统建筑中，屋脊的坡度通常在30度到40度之间，这样可以有效地将雨水和雪水引导下来，同时也考虑到了建筑的美观和结构的稳定性。 晾房则通常位于农村地区，特别是葡萄种植的地区。由于晾房主要用于晾晒葡萄等果蔬，因此屋顶的坡度可能会比较大，以便于果蔬的自然晾晒。例如，晾房的屋顶可能会有50度甚至更高的坡度，这样可以确保果蔬在雨水和阳光下得到均匀的晾晒，同时也可以减少果蔬受潮的风险。 总的来说，雨巷和晾房所在区域房屋屋脊坡度大小的差异主要是出于功能和环境的考虑。雨巷地区房屋的屋脊坡度可能更小，而晾房地区房屋的屋脊坡度可能更大，以适应不同的功能需求和气候条件。	雨巷和晾房所在区域房屋屋脊的坡度大小可能存在一定差异。一般来说，雨巷地区的房屋屋脊坡度会相对较大，这是因为雨巷地区降雨量较大，为了防止雨水顺着屋顶滞留，需要设计较大的坡度，以便让雨水快速流下来，减轻房屋承载的压力，防止水渗漏。而晾房所在区域的房屋屋脊坡度相对较小，因为晾房一般是用来晾晒葡萄等农作物的，不需要考虑雨水排放的问题，所以坡度可以设计得相对较小。 举例来说，雨巷地区的海草房由于需要应对大量降雨，通常屋顶的坡度会比较陡峭，以确保雨水迅速排放。而晾房一般并不需要经常面对大量降雨，因此屋脊的坡度可以设计得相对平缓。 。	b	a	tie	model_b	stud_a	stud_a
阅读图文材料，完成下列要求。贵州水城天生桥(由瀑流沿山谷裂隙冲蚀而成)景区位于六盘水的干河流域,境内喀斯特地貌广泛发育。水城天生桥为世界最高的可行驶汽车的公路天生桥,是河道洞穴坍塌后残留洞段，具有重要的研究价值。	说出喀斯特地貌的形成条件。	岩石具有透水性和可溶性，降水丰富时，水具有较强的溶解能力和流动性。	要形成喀斯特地貌，首先地形必须是畸岖、陡峭，并且受到流水侵蚀。其次，地质层中含有大量石灰岩也是必不可少的条件。最后，降水发达、气温湿润也是形成喀斯特地貌的重要因素。	经过长时间的溶蚀和侵蚀，河流逐渐改变了地表的形态，使其变得崎岖不平。随着溶蚀和侵蚀的持续作用，地表出现了溶蚀洼地、石林和峰林。随着河水的进一步下切，一部分水流进入地下形成了暗河。随着时间的推移，暗河逐渐干涸，形成了地下洞穴，而地表则出现了孤立的石峰。	a	stud_a	喀斯特地貌的形成条件主要是由于地下水的侵蚀作用。这种地貌通常出现在含有溶石盐岩石的地区，如石灰岩等。地下水会溶解岩石中的矿物质，逐渐形成一系列的溶洞和裂隙。随着时间的推移，这些溶洞和裂隙会逐渐扩大，形成独特的喀斯特地貌特征，如洞穴、峡谷、天生桥等。 在贵州省水城天生桥的例子中，瀑流沿山谷裂隙冲蚀而成的天生桥，正是喀斯特地貌形成条件的典型体现。这里的石灰岩地层被地下水侵蚀，形成了独特的天生桥结构。	喀斯特地貌的形成条件主要包括地质条件和水文条件。地质条件是指地下岩溶岩层丰富、易溶解的岩石地质条件，例如石灰岩、石膏岩等，这些岩石受水的侵蚀容易形成溶洞、地下河流等地貌特征。水文条件是指地下水的丰富程度和活跃性，地下水的运动对岩溶地貌的形成至关重要，它通过溶解、冲蚀、沉积等作用，塑造了喀斯特地貌的独特形态。 举例来说，贵州水城天生桥景区中的天生桥就是由于瀑布冲刷溶洞地形而形成，地下水活跃，加速了岩溶地貌的形成过程，形成了这一独特的景观。	tie	b	b	model_a	model_a	stud_a
冰川泥石流是由冰雪融水或冰湖渍决冲蚀形成的含有大量泥砂石块的特殊洪流，其形成的堆积体常对河道产生影响。藏东南帕隆藏布江流域是我国冰川泥石流的多发地区,随着气温升高,该流域冰川泥石流发生的频率增加。	说明图中冰川泥石流堆积体对虚线框内河岸形态变化的影响过程	冰川堆积体在河流的左岸形成凸岸，导致河道变窄和河水变深，使得主河道靠近右岸，流速加快，从而加强了对右岸的侵蚀，经过长期的侵蚀，右岸逐渐形成凹岸，河岸也由直变弯。	冰川泥石流堆积体对虚线框内河岸形态变化的影响过程是这样的：首先，冰堆积物改变了流水的方向；接着，河流长期蚀变冰堆积物，使河岸逐渐呈现出弯曲的河道形态；最终，河流的流向也被改变，逐渐形成复杂的曲流形态。	大量冰川泥石流堆积体堆积在河流原本的岸边，导致河流靠岸处被堵塞无法流通，河流开始向外侧蚀，侧蚀程度逐渐加大。在持续的侧蚀过程中，冰川泥石流堆积体逐渐形成河岸，使河岸的形态从原本的顺直转变为了“S”形。	b	stud_b	冰川泥石流堆积体对河岸形态的影响是一个逐步的过程，通常包括以下几个阶段： 1. **堆积初期**：当冰川泥石流发生时，它会携带大量的泥砂石块和碎冰流向下山坡。这些物质在冲击过程中会对河岸造成侵蚀，形成新的河床和河岸线。 2. **堆积加深**：随着泥石流的持续，堆积物逐渐堆叠起来，形成新的河岸线和河床。这些堆积物可能会阻塞河流的正常流向，导致河道变窄或变弯。 3. **河岸退缩**：在堆积物的影响下，河岸可能会因为受到冲击和侵蚀而退缩。这种退缩可能会导致河岸线向内侧移动，形成新的河岸线。 4. **河床抬高**：随着泥石流堆积物的不断堆积，河床的平均高度会上升。这可能会导致河流的水面下降，或者在某些情况下，河流可能会改变其流向寻找新的低洼路径。 5. **长期稳定**：一旦泥石流堆积物稳定下来，它们可能会形成新的河岸线和河床。这些堆积物可能会长期影响河道的形态，直到新的泥石流事件发生。 …	冰川泥石流堆积体对河岸形态变化的影响过程可以通过以下步骤来说明： 1. 冰川泥石流堆积体进入河道后，会造成河道水流速度突然增大，导致河岸侵蚀加剧。 2. 泥砂石块堆积在河岸一侧，形成堤坝状结构，阻碍了河水流动，使得河水冲击力增大，进一步加剧了河岸侵蚀。 3. 随着时间的推移，堆积体内的泥砂石块逐渐沉积，堆积体逐渐稳定，但仍会对河岸形态产生持续影响，可能导致河岸塌方或者改变河道流向。 综上所述，冰川泥石流堆积体对河岸形态的影响是通过加剧河岸侵蚀、形成堤坝状结构和持续性的影响来实现的。 。	b	tie	b	model_b	model_a	model_b
材料一：卫星发射窗口是允许运载火箭发射的时间范围，其宽窄受发射地的气象气候条件影响。文昌发射基地的发射窗口很窄	从气象气候条件方面分析文昌卫星发射中心发射窗口窄的原因。	该地区多雷电和强降雨天气；位于沿海地带，湿度大，云雾多，能见度较低；由于地处我国东南沿海，受夏季风影响时间长，雨季较长；此外，该地区容易受到台风等灾害的影响。	文昌卫星发射中心发射窗口较窄的原因是因为该地区属于热带季风气候，高温多雨，且靠近海洋，可能会受台风等自然灾害的影响。	文昌卫星发射中心发射窗口较窄的原因有三点：首先，该地邻近海洋，水汽较多，容易出现雨天情况；其次，气候变化较快，难以准确预测发射时机；最后，受地形阻挡，东北风易在此滞留，导致多发大风天气，影响发射安全。	b	stud_b	文昌卫星发射中心位于中国海南省文昌市，地处热带地区，其气候条件主要为热带海洋性气候。这种气候特点导致了以下几个因素，使得文昌发射基地的卫星发射窗口相对较窄： 1. **降水量较高**：热带地区的降水量通常较大，尤其是在雨季期间。频繁的降雨可能会影响发射场的操作，降低发射的可靠性和成功率。因此，为了确保发射条件，发射窗口需要在降雨较少的时间段内进行。 2. **风速和风向不稳定**：热带地区的风速和风向可能会突然变化，这可能对运载火箭的稳定性和飞行轨迹造成影响。为了保证火箭发射的安全，需要选择风速和风向相对稳定的时间段进行发射。 3. **高温和湿度**：热带地区的温度和湿度通常较高，这可能对火箭的发射和卫星的部署造成额外的挑战。高温可能导致火箭发射过程中的性能下降，而高湿度可能影响电子设备的正常工作。 4. **雷暴频发**：热带地区的天气容易出现雷暴，这可能对卫星发射造成干扰。雷暴期间…	回答: 文昌卫星发射中心发射窗口很窄的原因主要是受到当地气象气候条件的影响。文昌地处热带海洋气候区，受季风影响较大，常年有较强的东南季风，造成风向变化频繁，风速较大。这种气候条件下，发射窗口需要考虑风向、风速等因素，以确保火箭发射过程中的安全性。因此，为了避免恶劣的气象气候条件对发射过程造成影响，文昌卫星发射中心的发射窗口较窄。 举例来说，如果发射窗口设计得过宽，可能会因为风向突变或风速突然增大而导致发射风险增加，甚至影响到卫星发射的成功率。因此，为了提高发射的安全性和成功率，文昌卫星发射中心会根据实际气象气候条件设定较窄的发射窗口。 总的来说，文昌卫星发射中心发射窗口较窄的原因是为了充分考虑当地气象气候条件对发射过程的影响，确保发射的安全性和成功率。	a	a	a	model_a	stud_a	model_b
贵州高原为喀斯特高原,其生态环境十分脆弱,昼夜水热条件及其对植被变化的影响,可为该地区生态保护和防灾减灾提供理论支撑。	说明贵州省生态环境十分脆弱的原因。	贵州省地形崎岖，主要是喀斯特地貌，地形成形缓慢，土层薄，降水丰沛导致流水侵蚀作用强，土壤易流失。地下多溶洞和裂隙，地表水下渗多，导致地表缺水。	贵州省生态环境十分脆弱的原因主要有四个：其一，贵州属于喀斯特地貌，地势起伏，地形复杂；其二，水土流失严重，土地资源受到严重损耗；其三，贵州省平原少，大部分地区为山地，容易受到自然灾害的影响；其四，地形崎岖，交通不便，给生态环境保护和修复带来一定困难。	贵州省生态环境十分脆弱的原因主要有三个：首先，由于喀斯特地貌特殊，容易受到流水侵蚀和溶蚀的影响，形成了独特的地形；其次，气候湿润，降水丰富，导致侵蚀作用加剧；最后，夜间降水量极其丰富，而植被覆盖不足，导致水土流失严重。	b	stud_a	贵州省作为中国南部的喀斯特高原地区，其生态环境脆弱的原因主要包括以下几点： 1. 地形地质特征：喀斯特地貌以溶岩为主，地表岩石多为石灰岩、硅质岩等，易受水流侵蚀，形成了独特的山峰、峡谷、洞穴等地貌。这种地形结构使得贵州省的地质稳定性较差，容易发生地质灾害，如山体滑坡、地陷等。 2. 气候条件：贵州省位于亚热带季风气候区，气候变化剧烈，四季分明，雨量集中，导致水热条件的极端变化。夏季高温多雨，冬季寒冷干燥，这种昼夜水热条件对植被生长和生态系统的平衡产生了重大影响。 3. 植被类型：贵州省的植被类型多样，包括亚热带常绿阔叶林、针叶林、灌木丛等，但由于气候条件的变化和地理环境的限制，植被分布不均匀，易受自然灾害影响，如干旱、洪水、火灾等。 4. 生物多样性：贵州省是生物多样性丰富的地区，拥有许多珍稀濒危物种。然而，由于生态环境脆弱，许多物种面临着生存环境的威胁，例如森林砍伐、生态系统的破坏等。…	贵州省生态环境十分脆弱的原因主要包括以下几个方面： 1. 喀斯特地貌：贵州高原为喀斯特地貌，地表岩溶作用强烈，地下水系统发育，容易形成地下溶洞和地表塌陷等地质灾害，对生态环境造成破坏。 2. 多山地形：贵州省地势复杂，多山地形，山地林地占比高，易发生山体滑坡、泥石流等自然灾害，对生态环境造成严重影响。 3. 植被覆盖不足：部分地区植被覆盖率较低，土壤侵蚀严重，导致土地沙化和水土流失，加剧了生态环境的脆弱性。 4. 气候变化：贵州高原昼夜温差大，水热条件不稳定，气候变化频繁，对植被生长、动植物繁衍等生态环境因素产生影响。 综上所述，贵州省生态环境之所以十分脆弱，主要是受地貌、地形、植被覆盖以及气候变化等因素共同影响所致。 。	a	b	tie	model_a	model_a	model_b
贵州高原为喀斯特高原,其生态环境十分脆弱,昼夜水热条件及其对植被变化的影响,可为该地区生态保护和防灾减灾提供理论支撑。	据图概括贵州省气候特征。	该地区夏季高温多雨，冬季温和少雨，雨热同期，常有夜间降水，气温的年较差和日较差都较小。	贵州省的气候特点是夏季炎热，冬季凉爽，气温差异较大。同时，该地区气候湿润，降水相对丰富。在降水分布上，夜间降水比白天多，属于夜雨型气候。	贵州省属于亚热带季风气候，夏季高温多雨，冬季少雨。昼夜温差较大，春末夏初昼夜降水量季节变化明显。	a	stud_b	由于我是一个文本模式的AI，无法直接提供图像或图表。但是，我可以描述贵州省的气候特征，并解释这些特征是如何影响该地区生态环境的。 贵州省位于中国西南部，是一个典型的喀斯特高原地区。该地区的气候特点包括： 1. 温带季风气候：贵州省受亚洲大陆和太平洋的气候影响，具有明显的季节变化。冬季寒冷而干燥，夏季温暖湿润。 2. 昼夜温差大：由于贵州省地处高原，日照充足，昼夜温差较大。这种条件对当地的植被和生态系统产生了重要影响。 3. 水热条件：贵州省内有众多的洞穴和溶洞，这是喀斯特地貌的典型特征。这些洞穴和溶洞在雨季时会积水，形成季节性水库，这种水热条件对当地的生态环境和植被分布产生了深远的影响。 4. 植被变化：贵州省的植被主要由温带阔叶林和亚热带湿润林组成。随着气候条件的变化，植被类型和分布也会发生变化。例如，高温干旱的条件可能导致某些植物物种的退化，而适应高温和干旱的物种可能会变得更加普遍。…	贵州省气候特征主要表现为四季分明，夏季雨量充沛，冬季干燥，昼夜温差大。夏季气温高，多降雨，气候湿润，有利于植被生长；冬季气温较低，降水较少，气候干燥。昼夜温差大，白天温暖，夜晚凉爽，有利于植被的生长和调节。这些气候特征对贵州省的生态环境和植被变化具有重要影响。 举例来说，贵州省的气候特点使得该地区适宜茶叶、水稻等作物的种植，也有利于森林覆盖率的保持。但同时，也需要注意气候变化可能带来的灾害风险，比如干旱、洪涝等灾害对植被和生态环境的影响。 。	b	a	a	model_b	stud_a	stud_a
贵州高原为喀斯特高原,其生态环境十分脆弱,昼夜水热条件及其对植被变化的影响,可为该地区生态保护和防灾减灾提供理论支撑。	分析贵州多夜间降水的原因。	地形起伏，多山谷，夜间谷地盛行上升气流，水汽凝结，易形成降水。该地区植被较多，蒸发蒸腾作用强，山区水汽不易逸散，水汽充足。	贵州地处喀斯特地貌区，受流水侵蚀作用影响，形成了众多山脉。夜间，这些山脉吹来的山风使得各地相对较热，并且贵州地区河流纵横交错。热空气在夜间上升时带着水汽，经过冷却后形成降雨。因此，贵州地区多在夜间出现降水现象。	贵州多夜间降水的原因有三点。首先，昼夜温差大，导致暖空气在夜间遇冷后液化形成降雨。其次，受准静止锋影响，加上地区植被较多，蒸发蒸腾作用强，也促使了夜间降水的出现。	b	stud_b	贵州高原作为喀斯特高原，其地形地貌特征导致了多夜间降水的现象。喀斯特地貌是由溶岩和洞穴系统构成的，地表岩石主要是石灰岩，这种岩石在水的作用下具有很高的溶解率。白天，由于太阳辐射的热量，地表温度升高，空气中的水蒸气会升华成云雾，并在高空凝结形成云层。随着夜间温度的降低，云层中的水汽凝结成雨水，并在喀斯特地形的山峦、岩石表面上降落下来，形成了夜间降水。 此外，喀斯特地貌的多孔结构和丰富的洞穴系统也为夜间降水提供了条件。在白天，洞穴内的空气温度较低，能够吸收地表上的水汽，夜间随着外界温度的降低，洞穴内的水汽会凝结成露水，形成夜间的地下水流。 贵州多夜间降水的原因还包括其地理位置，位于亚热带和热带交界处，气候湿润，空气中的水汽含量较高。这些因素共同作用，导致了贵州高原的夜间降水现象。	贵州高原多夜间降水的原因主要有以下几点：首先，贵州高原地势复杂，山地密布，山谷深邃，空气容易凝结成云，夜间温度下降，水汽凝结成雨水。其次，贵州高原植被茂密，蒸发作用昼夜不断，夜间植物释放的水汽也会凝结成雨水。另外，贵州高原地处亚热带，气候湿润，水汽含量大，夜间降温时水汽凝结成雨水的可能性较大。总的来说，贵州高原多夜间降水的原因是由于地形、植被和气候等因素共同作用所致。	b	a	b	model_b	stud_a	model_b
玉米油是利用玉米胚芽生产的一种谷物油脂,营养丰富,口味清香。玉米油生产流程由毛油提取和毛油精炼等环节构成,胚芽的毛油提取率为40%,由毛油到精炼油的转化率为90%。山东邹平某公司通辽铁岭是我国建设最早、目前规模最大的玉米油鄂尔多斯惠民产品研发和生产企业,其玉米油销售量邹平占国内市场的50%。该公司在山东惠民辽宁铁岭、内蒙古通辽和鄂尔多斯建有毛油压榨工厂,在公司本部、浙江杭州广东广州建有精炼油和小包装产品生产基地,将毛油运输至精炼油生产基地多使用集装箱液袋(一次性使用的储存和运输各种非危险液体货物的软体包装容器),使用罐箱或铁桶运输则越来越少。杭州公司总部广州毛油压榨工厂精炼油和小包装产品生产基地	分析该公司在杭州、广州建设精炼油和小包装产品生产基地的主要原因。	接近市场，辐射人口多，市场规模大，符合当地消费者需求；运输毛油与运输精炼油的成本相近，由精炼油生产到小包装的工艺衔接紧密，产品可快速投放市场，有利于保证产品的新鲜度。	该公司选择在杭州、广州建设精炼油和小包装产品生产基地的主要原因包括以下几点：首先，这两个地区都位于发达地区，具有充足的资金支持；其次，杭州、广州的科技水平较高，拥有优秀的精炼技术；第三，这两个地区的交通线路较为便利，有利于将产品运输到多个市场；最后，选择在当地上市可以保持产品的新鲜度，为公司的发展提供更好的保障。	该公司选择在杭州和广州建设精炼油和小包装产品生产基地的主要原因包括以下几点：首先，广州和杭州等地制造业发达，有利于提高生产效率和降低成本；其次，杭州靠近市场，交通便利，便于产品的流通和销售；此外，这两处城市靠近沿海，有利于产品出口到国外市场；最后，技术先进，机械发展迅速，有利于提高产品质量和生产效率。	a	stud_b	该公司在杭州、广州建设精炼油和小包装产品生产基地的主要原因可能包括： 1. 便捷的市场接近：杭州和广州都是中国重要的经济中心和消费市场，建设生产基地可以更快地响应市场需求，减少运输时间和成本。 2. 人才资源优势：杭州和广州都拥有众多高等教育机构和专业人才，公司可以吸引和培养高素质的员工，提高生产效率和产品质量。 3. 政策和支持：中国政府鼓励在不同地区发展经济，提供各种支持措施，如税收优惠、资金补贴等，公司可以利用这些政策优势来降低运营成本。 4. 供应链整合：建设在不同地区的生产基地可以帮助公司更好地整合供应链，减少对单一地区供应商的依赖，提高供应链的稳定性和灵活性。 5. 市场多样化：通过在不同地区建设生产基地，公司可以更好地适应不同市场的需求，提供更多样化的产品，满足不同地区消费者的需求。 6. 环境和社会责任：公司可能考虑到在不同地区建设生产基地可以更好地履行其环境和社会责任，…	该公司在杭州、广州建设精炼油和小包装产品生产基地的主要原因可能是因为这两个地区有较为便利的交通条件和发达的物流网络。杭州和广州作为经济发达的城市，拥有完善的交通和物流设施，便于原材料的运输和产品的销售。此外，这两个地区人口密集，市场需求大，有利于公司产品的销售。在这两个地区建立生产基地也有利于降低生产成本，提高生产效率。另外，可能还存在当地政策支持或者资源优势等因素。总的来说，选择在杭州、广州建设生产基地的原因是多方面的，包括交通便利、市场需求、成本考量等因素。	b	a	a	model_b	stud_a	stud_a
地处云南元阳哈尼梯田世界文化遗产核心区的阿者科村，保留着完好的梯田生态系统、独特的哈尼传统民居和文化。曾经有的村民将传统民居出租给外地经营者,自己搬出村寨。为了保护哈尼传统文化,改变贫困落后状况,2018年某科研团队应当地政府邀请,经多方调研和探索,提出阿者科村实行内源式村集体企业主导的开发模式:不租不售、不靠外来资本介入;通过智力援助和当地政府支持,组织村民成立旅游发展公司,自我经营和管理,公司收入归全村所有,村集体公司留成30%,村民分红占70%。村民分红按传统民居40%、梯田30%、居住20%、户籍 10%执行。提高当地村民的收入和生活水平；留住原住民，保留原住民的部分生活方式，有利于传承独特的地方文化；使村民主人翁意识更强，更能自觉注重民居、梯田等遗产的保护；	说明阿者科村实行村集体企业主导的旅游开发模式的优势。	主要收入归还村合理分配收益，兼顾公平和效率，利于乡风和谐，减少矛盾；通过智力援助，提升村民的文化水平和技能。	优势：村集体企业主导的旅游开发模式有利于发挥本地独特文化的作用，激发了村民的服务热情，给游客更好的体验感。同时，这种模式发掘了村民的导游作用，引导游客更好地游览项目。此外，这种模式有利于保护哈尼传统文化，将天然旅游优势转化为经济优势。	优势：首先，村集体企业主导的旅游开发模式能够有效提高当地居民收入，改善贫困落后状况。其次，村集体企业能够展示完整独特的哈尼传统民居和文化，吸引游客前往参观。此外，这种模式可以避免外来经营者对当地传统民风民俗和梯田生态系统造成破坏。最后，村民配合度更高，推进政策改革更加顺利。	tie	stud_b	阿者科村实行村集体企业主导的旅游开发模式具有以下优势： 1. 保护传统文化：通过不租不售、不靠外来资本介入的方式，阿者科村成功保护了哈尼传统民居和梯田生态系统，保留了原住民的生活方式，有利于传承独特的地方文化。 2. 提高村民收入：通过组织村民成立旅游发展公司，自我经营和管理，公司收入归全村所有，村集体公司留成30%，村民分红占70%，有效提高了当地村民的收入和生活水平。 3. 增强村民主人翁意识：这种模式使村民更加重视对传统民居、梯田等遗产的保护，因为他们直接从中获得收益，增强了村民对保护文化遗产的自觉性。 4. 促进可持续发展：内源式发展模式减少了对外部资本的依赖，降低了环境破坏的风险，实现了旅游开发与生态保护的平衡，有利于长期的可持续发展。 5. 促进地方经济发展：通过旅游业的发展，阿者科村不仅提升了村民的生活质量，还为地方经济注入了新的活力，促进了当地经济的多元化和稳定增长。	阿者科村实行村集体企业主导的旅游开发模式有以下优势： 1. 保护哈尼传统文化：通过村集体企业主导的开发模式，村民可以更好地保护和传承自己的传统文化，不会被外来资本的影响改变原有的生活方式和文化习俗。 2. 增加村民收入和改善生活水平：通过村集体企业的经营，村民可以获得更多的分红，增加收入，改善生活水平，有利于减少贫困落后状况。 3. 增强村民主人翁意识：村集体企业的经营让村民更加参与和关注村子的发展，增强他们的主人翁意识，更有动力和积极性去保护和发展村子的传统文化和遗产。 4. 提高当地旅游业发展水平：通过村集体企业的经营，可以提高当地旅游业的发展水平，吸引更多的游客前来，促进当地经济的发展。 5. 社会效益和经济效益兼顾：村集体企业经营的模式不仅能带来经济效益，还能带来社会效益，有利于村民和整个村子的长远发展。	tie	tie	tie	model_b	model_a	model_b
竹排江是南宁市主要的内河之一，由北向南贯穿市区，其上游河段叫那考河。20 世紀 90 年 代开始，沿河养殖业兴起，大量污水和垃圾进入那考河，那考河一度变成“纳污河”。从2015年起,当地政府按照海绵城市建设理念,实施了河道截污、河道生态、沿岸景观工程以及污水厂建设等,由“点源治理”转变为“造度集中、就地处理、就地回用”的流域综合治理。如今那考河沿岸成为水清岸绿的滨江公园。	简述采用“适度集中、就地处理、就地回用”模式治理那考河污染的意义。	通过节约治污成本，提高水的循环利用率，实现垃圾的无害化处理和资源化利用，有效减少污染物入河，降低污染物的影响范围和强度，改善全流域的环境和城市人居环境。	采用“适度集中、就地处理、就地回用”模式治理那考河污染具有以下重要意义：首先，有利于快速减轻污染、不造成新污染；其次，有利于降低处理过程及运输成本；同时，节约资源并实现回收利用；此外，能够提高当地就业收入，促进消费增长；还能避免盲从，加快治理速度；最后，有助于加强绿色化建设，贯彻新发展理念，实现绿色流域建设的目标。	采用“适度集中、就地处理、就地回用”模式治理那考河污染具有重要意义。首先，可以减少脏水和垃圾进入河流，从而有效保护河流水质。其次，有利于改善那考河的生态环境，为污染治理提供清晰的方向。此外，这种模式有利于回收利用资源，推动资源的最大化利用。最后，可以促进那老河治理的有序进行，提高治理效率。这种模式的实施将对那考河的环境保护和可持续发展产生积极影响。	b	stud_b	采用“适度集中、就地处理、就地回用”模式治理那考河污染的意义在于实现了河流的全面治理和可持续发展。这种模式的核心在于将污水处理和资源回收结合起来，既解决了污染问题，又提高了资源利用效率。 首先，“适度集中”意味着将散乱的污水排放点集中到一定的处理设施中，这样可以更有效地进行污水处理和管理。通过集中处理，可以减少污染物对河流的直接影响，降低水质污染的风险。 其次，“就地处理”强调在河流沿岸进行污水处理，减少污水运输过程中的污染和能耗。这种方式可以减少对环境的影响，同时也能减少运输成本，提高处理效率。 最后，“就地回用”则是指将处理后的水资源用于农业灌溉、生态修复等，或者作为城市的再生水资源。这不仅可以减少对地下水的依赖，还能减少对外部水源的需求，实现水资源的循环利用。 通过这种模式的实施，那考河不仅水质得到显著改善，还形成了沿岸的滨江公园，提升了城市的生态环境和居民的生活质量。这种模式的成…	采用“适度集中、就地处理、就地回用”模式治理那考河污染的意义在于可以有效地解决河道污染问题，同时实现资源的最大化利用。通过集中污水处理，可以减少污染物的排放，提高水质，改善河流生态环境。同时，就地处理和回用污水可以减少水资源的浪费，提高水资源的利用效率。这种模式不仅可以保护环境，还可以实现资源的循环利用，促进经济可持续发展。。	b	b	b	model_b	model_a	model_b
区位熵是评价产业专业化水平、衡量产业比较优势常用的指标。如果值大于1,表业具有比较优势,值越大,产业具有的比较优势越显著,专业化程度越高。东北地区是的粮食主产区之一，负担着保障国家粮食安全的重任。	分别描述1990~2018年东北三省农业生产区位熵的变化特点。	黑龙江省在2000年前增长率略低于1，增长缓慢；2000年后快速增长，目前仍有增长趋势。吉林省长期维持在略高于1的水平，变化幅度小，近几年略有下降。辽宁省总体呈小幅度上升趋势，2004年以前略低于1，2004年之后维持在1上下，近年来略有提升。21 黑龙江省地广人稀,人均耕地面积大;农业生产规模和机械化水平高;黑土分布广,水热组合条件较好,适宜发展粮食生产;国家巩固、提升东北地区商品粮的核心地位,政策激发了农民种粮的积极性。	东北三省农业生产区位熵在1990~2018年间呈现出明显的变化特点。总体趋势是呈上升的态势。其中，吉林省的区位熵变化不大，总体水平较高，而辽宁省的水平相对较低。而黑龙江省的区位熵变化较大，水平显著提高。	1990年至2018年间，东北三省农业生产区位熵的变化特点如下：黑龙江的农业生产区位熵上升幅度最大，吉林呈波动增长，变化幅度较小，而辽宁则呈缓慢增长，变化幅度较稳缓。	b	stud_a	由于我无法提供具体的数据和图表，我将基于一般的理解和可能的趋势来描述东北三省农业生产区位熵的变化特点。 1990年至2018年间，东北三省（辽宁、吉林、黑龙江）作为中国的粮食主产区，其农业生产区位熵的变化主要受以下因素影响： 1. 政策支持：中国政府一直以来对东北地区的农业发展给予了较多的政策支持，包括土地改革、技术改造、资金投入等，这些都有助于提高农业生产的专业化水平和效率。 2. 技术进步：随着农业技术的进步，如种植技术、灌溉系统、机械化程度的提高等，东北地区的农业生产效率和专业化程度有所提升。 3. 市场需求变化：随着中国经济的快速发展，市场对粮食的需求量增加，东北地区的粮食生产也随之增加，以满足国内市场的需求。 4. 环境和气候变化：东北地区的气候条件较为恶劣，特别是近年来气候变化导致的极端天气事件，如干旱、洪水等，对农业生产造成了影响，这可能导致农业生产区位熵的波动。 5. 国…	1990~2018年东北三省农业生产区位熵的变化特点可以描述为：在1990年，东北三省的农业生产区位熵可能较高，因为东北地区是粮食主产区之一，具有比较优势。随着时间的推移，随着农业现代化和产业结构调整的推进，东北三省的农业生产区位熵可能有所下降，即专业化程度逐渐提高，比较优势逐渐显著。然而，在某些年份可能会有波动，受到不同因素的影响，比如政策调整、市场需求变化等等。总体来说，随着时间的推移，东北三省农业生产区位熵可能会呈现逐渐下降的趋势，反映出农业产业在专业化方面的持续改善和发展。 。	a	a	a	model_a	stud_a	stud_a
区位熵是评价产业专业化水平、衡量产业比较优势常用的指标。如果值大于1,表业具有比较优势,值越大,产业具有的比较优势越显著,专业化程度越高。东北地区是的粮食主产区之一，负担着保障国家粮食安全的重任。	近年来，黑龙江省粮食生产在全国比较优势十分突出。试分析主要原因。	黑龙江省地广人稀，人均耕地面积大，农业生产规模和机械化水平高，黑土分布广且水热组合条件较好，适宜发展粮食生产，同时国家政策支持巩固提升东北地区商品粮的核心地位，这激发了农民种粮的积极性。	近年来，黑龙江省粮食生产在全国比较优势十分突出的主要原因有以下几点。首先，黑龙江省地广人稀，人均面积较多，农业机械化水平高，这为粮食生产提供了良好的条件。其次，黑龙江省黑土广布且肥沃，土层深厚，适合农作物生长，有利于提高粮食产量。另外，黑龙江省气候较温润，适宜农作物生长，也是粮食生产比较优势的重要因素之一。综上所述，地理条件和气候优势是黑龙江省粮食生产在全国比较优势突出的主要原因。	近年来，黑龙江省在粮食生产方面展现出了明显的比较优势。主要原因有三点：首先，粮食农业生产的专业化程度不断提高，农民技术水平不断提升，种植技术不断改进，这有助于提高粮食产量和质量。其次，黑龙江省拥有广阔的耕作面积和大规模的生产，这为粮食生产提供了良好的基础条件。最后，黑龙江省土壤条件优越，土壤肥沃，这也是提高粮食产量的重要因素之一。综上所述，这些因素共同作用，使得黑龙江省的粮食生产在全国表现突出。	a	stud_a	黑龙江省粮食生产近年来在全国比较优势十分突出，主要原因可以从以下几个方面来分析： 1. 气候条件：黑龙江省位于中国东北地区，拥有典型的温带季风气候，四季分明，降水充沛，特别是夏季降水丰富，为农作物的生长提供了良好的条件。这种气候条件有利于大豆、玉米等作物的生长，提高了粮食产量。 2. 土地资源：黑龙江省拥有广阔的土地资源，特别是黑土带的肥沃土地，为粮食生产提供了坚实的物质基础。黑土带的土壤肥力高，水分保留能力强，适合种植各种粮食作物。 3. 政策支持：近年来，中国政府对于粮食安全问题给予了高度重视，实施了一系列支持农业发展的政策，如土地承包制度改革、农业补贴、农机化等。这些政策有助于提高粮食生产效率和产量，增强粮食生产的竞争力。 4. 科技进步：科技进步是提高粮食生产效率和产量的关键因素。黑龙江省在农业科技方面投入较多，推广了高产、高效的作物品种，如高产玉米、优质大豆等，提高了粮食产量。…	黑龙江省粮食生产在全国比较优势突出的主要原因包括以下几点： 1. 地理优势：黑龙江省地处东北地区，气候条件适宜粮食生产，土地资源丰富，拥有大片肥沃的黑土地，适合种植粮食作物，如水稻、玉米等。 2. 技术支持：黑龙江省注重农业科技创新，推广高产高效的农业生产技术，提高粮食产量和质量。例如，引进先进的种植技术、育种技术和农机化设备。 3. 政策支持：政府出台了一系列扶持农业发展的政策措施，包括财政补贴、农业保险、土地流转等，促进了农业生产的发展。 4. 产业集聚效应：黑龙江省农业产业链完整，形成了完善的粮食生产体系，包括种植、加工、物流等环节，形成了产业集聚效应，提高了整体产业竞争力。 5. 人才优势：黑龙江省拥有丰富的农业人才资源，从事农业生产的技术人员和管理人员水平较高，为粮食生产提供了人力保障。 综上所述，黑龙江省粮食生产在全国比较优势突出的原因是综合地理、技术、政策、产业和人才等多方…	tie	a	a	model_a	stud_a	stud_a
区位熵是评价产业专业化水平、衡量产业比较优势常用的指标。如果值大于1,表业具有比较优势,值越大,产业具有的比较优势越显著,专业化程度越高。东北地区是的粮食主产区之一，负担着保障国家粮食安全的重任。	调查发现,辽宁省的渔业生产区位熵明显高于其种植业、畜牧业、林业等其他农业部分。试说明其渔业区位熵高的主要原因。	辽宁省毗邻渤海和黄海，具有漫长的海岸线和丰富的海洋渔业资源，地理位置紧靠京津冀都市圈和东北地区，消费市场广阔，海洋捕捞业历史悠久且船舶制造技术先进，国家政策支持海洋牧场和国家级海洋牧场示范区的建设，从而促进了渔业经济的发展。	辽宁省的渔业生产区位熵明显高于其种植业、畜牧业、林业等其他农业部分的主要原因是位于沿海地区，渔业发展优势大。这里有广阔的浅海大陆架，发展规模大；海水温度适宜，适合鱼类生长；同时，饵料丰富，海水上浮游生物多，满足了食物需求。	调查发现，辽宁省的渔业生产区位熵明显高于其种植业、畜牧业、林业等其他农业部分。这主要原因在于，一是纬度较低，气候温暖，热量条件较好；二是湿地较多，水深鱼肥；三是地形适宜，渔业资源丰富；四是具有悠久的历史传统，渔民经验丰富。这些因素共同作用，使得辽宁省的渔业生产区位熵相对较高。	b	stud_b	辽宁省的渔业区位熵高，主要原因可以从以下几个方面来解释： 1. 地理位置优势：辽宁省位于中国东北沿海地区，拥有长 coastline 和众多岛屿，这为渔业的发展提供了丰富的海洋资源和多样的渔场。辽宁省的渔业能够充分利用海洋资源，捕捞各种海洋生物，包括鱼类、贝类、藻类等。 2. 气候条件：辽宁省的气候条件适宜渔业发展，具有季风气候特征，冬季温和，夏季凉爽，水温变化较小，这有利于海洋生物的生长和繁殖，为渔业生产提供了良好的自然条件。 3. 政策支持：中国政府一直重视渔业的发展，特别是在东北地区，为了促进当地经济的可持续发展，政府提供了诸多政策支持，如渔业发展规划、渔船改造补贴、渔业技术培训等，这些都有助于提升辽宁省渔业的生产效率和专业化程度。 4. 产业结构调整：随着中国经济的发展，特别是东北地区的产业结构调整，渔业作为一种具有比较优势的产业，得到了更多的投资和发展。企业和政府在渔业的现代化…	辽宁省渔业区位熵高于其他农业部分的主要原因可能是由于辽宁省具有较长的海岸线和丰富的海洋资源。作为一个沿海省份，辽宁省拥有广阔的海域，适宜于各种渔业资源的生长和繁衍，例如各类海鱼、贝类、虾类等。这些海洋资源的丰富，使得辽宁省在渔业领域具有较大的比较优势，也使得其渔业生产的专业化程度较高，区位熵相对较大。 举例来说，辽宁省拥有辽河口、渤海湾等重要的渔业渔场，这些地区的水域适宜于各类渔业资源的生长，为渔业生产提供了良好的环境条件。此外，辽宁省在渔业方面也有较为完善的生产体系和技术支持，使得其渔业生产更加高效和专业化。 总而言之，辽宁省渔业区位熵高的主要原因是其丰富的海洋资源、优越的地理位置和较为完善的生产体系。这些因素共同作用，使得辽宁省的渔业在农业部分中表现出较高的专业化水平和比较优势。	a	b	tie	model_a	model_a	model_b
区位熵是评价产业专业化水平、衡量产业比较优势常用的指标。如果值大于1,表业具有比较优势,值越大,产业具有的比较优势越显著,专业化程度越高。东北地区是的粮食主产区之一，负担着保障国家粮食安全的重任。	请你为东北地区保障国家粮食安全献计献策。	我们应大力发展粮食生产，支持主产区建设粮食生产核心区，确保粮食种植而积和产量保持稳定，巩固提升全国粮食生产基地的地位，推进高标准农田建设，提高机械化水平，加强种质资源的保护和利用，支持高效旱作农业的发展，并高质量推进粮食生产功能区、重要农产品生产保护区和特色农产品优势区的建设，打造绿色农产品生产加工供应基地。	为了保障东北地区国家粮食安全，我们可以采取以下措施： 首先，加大科技投入，以提高粮食产量。其次，实行科学管理，提高储粮能力。最后，保护环境，实现可持续发展。通过这些措施，我们可以有效地保障东北地区的粮食安全。	为了保障东北地区的国家粮食安全，我们可以采取以下措施： 1. 建立粮食审核机制，确保粮食储备充足； 2. 提升粮食生产技术，增加产量，保持粮食数量的稳定供应； 3. 提高农业专业水平，改进种植方式，确保粮食质量； 4. 制定政策措施，为东北地区粮食安全提供保障。	b	stud_a	为了进一步提升东北地区在保障国家粮食安全方面的能力，可以采取以下策略： 1. **产业链优化与升级**：鼓励东北地区的粮食产业链进行优化和升级，特别是在种植、加工、储存和运输等环节。通过引进先进的种植技术和机械化生产，提高粮食产量和质量。同时，发展粮食加工产业，增加附加值，提高产品的竞争力。 2. **技术创新与研发投入**：加大对农业科技研发的投入，推广适合东北地区气候条件的高产、抗病、抗旱的作物品种。同时，利用现代信息技术，如大数据、云计算等，提高农业生产的智能化水平，实现精准农业。 3. **生态农业与可持续发展**：推广生态农业模式，注重土壤保肥、水资源的合理利用和生态平衡。通过减少化肥和农药的使用，保护环境，同时提高粮食的安全性和可持续性。 4. **市场营销与品牌建设**：建立东北地区粮食的品牌，通过市场营销策略提升产品的知名度和市场占有率。同时，拓展国内外市场，增加粮食的出…	为东北地区保障国家粮食安全，可以从以下几个方面提出建议： 1. 提高粮食生产效率：通过推广科学种植技术和现代农业设施，提高农田利用率和作物产量，确保粮食生产的稳定性和高效性。 2. 加强农业科研和技术支持：增加对农业科研机构的投入，加强科技创新，培育高产优质新品种，提高抗逆性和适应性，以应对气候变化和病虫害等挑战。 3. 完善农业产业链：发展农业产业集群，促进产业升级和农业现代化，提高农产品附加值，增强东北地区的产业比较优势。 4. 加强粮食储备和保障体系：建立健全的粮食储备体系，确保粮食的供应和安全，应对突发情况和市场波动。 5. 推动农村产业发展：通过发展农村产业，增加农民收入，改善农民生活水平，提高农民的生产积极性和参与度，促进农业可持续发展。	b	b	b	model_b	model_a	model_b
色楞格河是蒙古最大和水量最充沛的一条河流,源于蒙古杭爱山北坡,流经蒙古北部,注入俄罗斯贝加尔湖，是贝加尔湖主要的补给水源之一。色楞格河全长约1024公里,苏赫巴托尔以上河段水流湍急,河床落差约720米,以下河段5月之后可通航。蒙古南部水资源缺乏,为缓解缺水问题,提出“北水南调”构想,即在蒙俄边境的苏赫巴托尔市附近筑坝拦水,将北流的河水堵截在蒙古境内,然后挖运河将水引至扎门乌德。	指出色楞格河主要的水文特征	该地区以雨水、地下水、冰雪融水为主要水源补给，存在春汛和夏汛，导致径流量季节变化大，结冰期长且含沙量大，有凌汛现象，苏赫巴托市以上河段水能资源丰富。	指出色朗格河的主要水文特征包括流量大、流程长和流域面积广。	指出色朗格河主要的水文特征包括：上河段水流湍急，流速快，水量充沛，流量较大，落差大，含沙量大，结冰期长，易产生凌汛现象。	b	stud_b	色楞格河的主要水文特征包括： 1. 水量充沛：作为蒙古最大河流，色楞格河的水量丰富，是蒙古北部地区的主要水源。 2. 长度：全长约1024公里，流经蒙古北部并注入俄罗斯的贝加尔湖。 3. 水流特性：河流的湍急程度因地理位置而异，苏赫巴托尔以上的河段水流湍急，河床落差约为720米，这表明该河段具有较大的水能潜力。 4. 航运条件：色楞格河的下游河段在5月之后水量充足，河道平稳，适宜通航。 5. 水资源分配：由于蒙古南部地区水资源相对缺乏，为了缓解这一问题，提出了“北水南调”计划，即在蒙古和俄罗斯边境的苏赫巴托尔市附近筑坝，控制水流，并通过挖掘运河将水引至蒙古南部的扎门乌德地区。	色楞格河的主要水文特征包括其水量充沛、流域面积广阔、河道长度较长等。由于色楞格河源自高山，河水来自融化的雪水和降雨，因此在苏赫巴托尔以上河段水流湍急，河床落差较大。另外，色楞格河的水量在5月之后逐渐增加，下游河段也可以通航，这说明色楞格河具有明显的季节性变化。 举例来说，由于色楞格河是贝加尔湖的主要补给水源之一，其水量对于维持贝加尔湖水位的稳定起着重要作用。因此，色楞格河的水文特征对于整个生态系统和当地居民的生活都具有重要意义。	b	tie	b	model_b	stud_a	model_b
色楞格河是蒙古最大和水量最充沛的一条河流,源于蒙古杭爱山北坡,流经蒙古北部,注入俄罗斯贝加尔湖，是贝加尔湖主要的补给水源之一。色楞格河全长约1024公里,苏赫巴托尔以上河段水流湍急,河床落差约720米,以下河段5月之后可通航。蒙古南部水资源缺乏,为缓解缺水问题,提出“北水南调”构想,即在蒙俄边境的苏赫巴托尔市附近筑坝拦水,将北流的河水堵截在蒙古境内,然后挖运河将水引至扎门乌德。	分析色楞格河航运价值不高的主要原因。	流域内降水量较少，河流径流量较小，纬度较高导致结冰期长，流域大部分区域位于山区，流程短且河流落差大，加之流域内人口稀少，货运量小。	分析色楞格河航运价值不高的主要原因包括：河道曲折，不适宜开发航运；河床落差大，影响航运的安全；水流流速快，造成航运的安全隐患；流经城市少，货运需求较低；河流有结冰期，航运时间受限。	分析色朗格河航运价值不高的主要原因包括：有结冰期，通航时间短；河床落差较大，不利于航运；货物运输量较低，对航运需求小；河流中的含沙量较大，不利于航运。	b	stud_b	色楞格河航运价值不高的主要原因包括： 1. 地理位置和流域特性：色楞格河主要流经蒙古北部地区，河流的上游水流湍急，河床落差大，这使得河流的航运条件在上游部分并不适宜。河流的下游在5月之后才可通航，这限制了整个河流的航运季节。 2. 水量分配：色楞格河是贝加尔湖的主要补给水源之一，其水量主要用于维持湖泊的水位和生态平衡。因此，河水的主要目的地是贝加尔湖，而不是用于航运。 3. “北水南调”计划：为了缓解蒙古南部地区的水资源短缺问题，提出了“北水南调”计划，即在蒙俄边境的苏赫巴托尔市附近筑坝拦水，将河水引至蒙古南部地区。这个计划的实施意味着河水的主要用途是用于水资源的南北调度，而不是航运。 4. 技术和经济因素：在色楞格河流域，水运技术和基础设施的发展相对落后，相比之下，陆运方式更加成熟和经济。因此，尽管河流有航运潜力，但实际上航运的成本和效率可能不如陆运。	色楞格河航运价值不高的主要原因可能有几个方面。首先，色楞格河上游的水流湍急，河床落差大，这使得上游河段不易通航，限制了船只的使用范围。其次，色楞格河下游的航道在5月之后才能通航，这也限制了河流的航运时间，使得航运效率不高。此外，色楞格河在蒙古南部地区并不是主要的交通干道，周边地区交通发达程度不高，也导致了色楞格河航运价值不高的情况。 举例来说，如果将色楞格河与中国的长江相比，可以看到长江沿岸有众多大城市和工业基地，航运起到了重要的作用，而色楞格河周边地区相对较为荒凉，交通需求不大，这也影响了色楞格河航运的价值。 综上所述，色楞格河航运价值不高的主要原因可能是受限于上游河段的湍急水流和下游通航时间的限制，以及周边地区交通发达程度不高等因素的影响。 .	b	a	a	model_b	stud_a	stud_a
色楞格河是蒙古最大和水量最充沛的一条河流,源于蒙古杭爱山北坡,流经蒙古北部,注入俄罗斯贝加尔湖，是贝加尔湖主要的补给水源之一。色楞格河全长约1024公里,苏赫巴托尔以上河段水流湍急,河床落差约720米,以下河段5月之后可通航。蒙古南部水资源缺乏,为缓解缺水问题,提出“北水南调”构想,即在蒙俄边境的苏赫巴托尔市附近筑坝拦水,将北流的河水堵截在蒙古境内,然后挖运河将水引至扎门乌德。	评价蒙古“北水南调”工程对下游自然环境的影响。	不利影响包括：筑坝拦水导致下游径流量减少，汇入贝加尔湖的水量减少可能导致湖区周围温差增大，同时河流流速减慢引起泥沙淤积，导致下游河床抬升，流速减慢减弱了水体自净能力，河流及湖泊水质可能变差，筑坝阻断部分鱼类的洄游线路，破坏了水坝周边的地理环境，可能导致生物多样性减少，含沙量减少可能导致河口三角洲萎缩和湖区鱼类营养物质减少，但有利影响是可以有效地缓解下游的洪涝灾害。	蒙古“北水南调”工程对下游自然环境的影响存在着两面性。一方面，该工程为下游地区提供了丰富的水资源，有助于保证下游地区生物多样性的稳定。然而，另一方面，该工程可能会导致地表河流和河床抬升的问题，并且可能会导致水资源的污染。因此，在实施该工程时需要谨慎考虑，以确保对下游自然环境的影响最小化。	对下游自然环境造成负面影响。	a	stud_a	"北水南调"工程是蒙古为了缓解南部地区水资源短缺而提出的一个构想。从自然环境的角度来看，这个工程可能会对下游地区产生一系列影响。 首先，堵截色楞格河的水流可能会对河流的自然生态产生影响。色楞格河是蒙古北部的重要河流，它的水流湍急，河床落差大，这些都是河流生态系统的重要组成部分。堵截河流可能会改变水流的动力学，影响鱼类和其他水生生物的迁徙和生存环境。 其次，引水至扎门乌德可能会改变当地的水文条件，影响地下水的循环和地表水的质量。长期来看，这可能会对当地的生态平衡和农业生产造成影响。 再者，工程的实施可能会对贝加尔湖的水量和水质产生影响。色楞格河是贝加尔湖的主要补给水源之一，改变河流的水量和水质可能会对湖泊的生态系统产生连锁反应。 最后，尽管"北水南调"旨在缓解水资源短缺，但工程的实施也可能会对下游地区的气候条件产生影响。改变水文条件可能会影响当地的微气候，进而影响农业生产和生态系统。 综上…	蒙古的“北水南调”工程对下游自然环境可能会产生一些潜在影响。首先，拦截色楞格河的水流可能会导致贝加尔湖水位下降，影响湖区生态系统的平衡。此外，挖运河的过程可能会破坏周边地区的生态环境，影响当地的植被和野生动物栖息地。另外，引水过程中可能会导致水质污染，对下游水域的水生生物产生影响。因此，在实施“北水南调”工程时，需要进行全面的环境影响评估，并采取相应的保护措施，以最大程度地减少对下游自然环境的不利影响。	a	b	b	model_a	model_a	model_b
黄金是一种稀缺的贵金属，也是国际上的通用货币，近年来，全球各地区的黄金开采量逐年降低。瓦图科拉金矿是一个高品位金矿，位于斐济最大岛屿——维提岛北部，平均品位达10.8克/吨。2022年上半年,斐济瓦图科拉金矿共生产黄金约12132盎司。金矿的开采为当地带来了巨大的财富,但也对当地地理环境产生了诸多不利影响。	推测瓦图科拉金矿开采对维提岛地理环境产生的不利影响,并说明为减轻这些不利影响可采取的措施。	金矿开采产生的不利影响包括大量废水、废渣的排放，造成水污染、大气污染和土壤污染，破坏了地表形态和矿区植被，导致水土流失、滑坡、坍塌等现象频发，开采和矿渣堆放释放的大量污水和有毒物质严重污染了海洋环境，破坏了海洋生物群落的生存环境，减少了生物多样性，措施包括提高技术和设备水平，减少金矿开采过程中产生的废水、废渣、废气，采取综合措施治理矿区环境污染问题，加大矿山地质环境保护执法力度，加强矿区生态环境保护，对矿区土地复垦和整治，提高被破坏土地的利用率和植被覆盖率，对采空区进行填充，减少地表沉降塌陷，利用地理信息技术加强对矿区的环境监测。	不利影响：推测瓦图科拉金矿开采对维提岛地理环境的不利影响包括：破坏当地生态环境，因岛屿自我调节能力不强；植被覆盖率减少，易导致水土流失；河流中流入大量矿物质，易使水体富营养化；大量金矿被采，易使地面沉降。 措施：为减轻这些不利影响，可采取以下措施：合理有效地对资源开发利用；施行植物工程等措施，多植树造林；宣传保护环境，提高环境保护意识；政府出台相关政策并加强监管和约束。	推测瓦图科拉金矿开采可能对维提岛地理环境造成的不利影响包括破坏生态环境、污染空气和地下水。为减轻这些不利影响，可以采取以下措施：管理开发，规划好开发地段，降低不必要的破坏；提高开采效率和质量，减少对地表结构的破坏；做好相关污染处理措施，降低污染。	a	stud_a	瓦图科拉金矿的开采对维提岛的地理环境可能产生了一系列的负面影响，包括但不限于水资源污染、生态系统破坏、土壤侵蚀、噪音和振动污染以及对当地生物多样性的影响。例如，开采过程中可能会使用大量的水来提取金矿，这可能会导致地下水位下降，影响当地的水资源供应。此外，开采活动可能会破坏原生植被和动物栖息地，导致生态系统的不稳定。 为了减轻这些不利影响，可以采取以下措施： 1. **环境监测和管理**：定期监测开采活动对环境的影响，并采取适当的措施来控制和减少污染。例如，可以建立监测站点来跟踪水质和土壤质量的变化。 2. **恢复和再生植被**：在开采完成后，应进行土地恢复工作，种植适合当地环境的植被，以促进生态系统的恢复。 3. **水资源管理**：采取措施减少开采过程中的水资源消耗，例如通过提高水的循环利用率或采用更节水的提取技术。 4. **生态保护区**：在开采区域周围设立保护区，以保护未受开采…	瓦图科拉金矿的开采对维提岛地理环境可能产生的不利影响包括土地破坏、水资源污染、空气污染等问题。开采过程中可能会导致土地裸露，植被破坏，造成土壤侵蚀和水土流失。同时，开采过程中使用的化学物质和有害废弃物可能会污染当地水资源，对生态系统造成破坏。另外，开采过程中释放的粉尘和废气可能导致空气污染，对当地居民的健康构成威胁。 为减轻这些不利影响，可以采取一些措施，如加强环境监测和管理，制定严格的环境保护法规和措施，确保开采过程中的环境影响得到有效监测和控制。同时，可以推行绿色采矿技术，减少化学品的使用和废弃物的排放，提高资源利用率，降低对环境的影响。此外，可以加强社会责任投资，开展环境修复和生态保护工作，以缓解开采对当地生态系统的破坏，并为当地居民提供更好的生活环境。 。	b	a	tie	model_b	stud_a	model_b
康养旅游是以健康养生为目的的旅游活动。德国是世界上发展康养旅游产业最早的国家,目前共有约350处康养旅游目的地,形成了以国家自然景观为核心的康养旅游体系。巴登巴登小镇位于德国西南部的巴登一符腾堡州黑森林国家公园内,它是世界著名的文化遗产小镇和温泉小镇,同时也是德国重要的森林康养小镇。小镇除了森林和温泉康养设施外,还拥有国际赛马会、世界舞蹈晚会、国际会议展览等多类休闲活动项目,提供森林、温泉疗养和完善的旅游度假服务。	说明德国巴登巴登小镇成为世界著名康养小镇的区位条件。	该地区的森林和温泉等自然条件优越，非常适宜康养，地处世界发达地区，居民消费能力强，市场广阔，地理位置在欧洲中部，海陆空交通便捷，是一个传统的旅游胜地，基础设施完善，接待能力强，经济发达，医疗康养等服务水平高，历史悠久，是一个世界著名的文化遗产小镇，知名度高。	巴登巴登小镇成为世界著名康养小镇的区位条件包括：具有温带海洋性气候，全年温和湿润、气候宜人；森林覆盖率高，空气质量好；温泉广布，提供温泉疗养服务；休闲娱乐项目丰富多样，促进身心健康；政府有政策鼓励支持；拥有世界著名文化遗产地，文化有蕴丰厚；基础设施完善，康养地建设经验丰富。	巴登巴登小镇成为世界著名康养小镇的区位条件主要包括以下几点：首先，该小镇地处旅游发展资源丰富的德国，拥有得天独厚的旅游背景；其次，小镇位于国家森林公园内，环境清幽优美；再者，巴登巴登小镇拥有丰富的优势资源供给，能够满足不同游客的需求；此外，小镇提供多样化的休闲活动项目，让游客能够尽情放松身心；最后，巴登巴登小镇还提供着许多令人赞赏的旅游度假服务，为游客提供舒适便捷的体验。	a	stud_b	德国巴登巴登小镇成为世界著名的康养小镇，主要得益于其独特的地理位置和丰富的自然资源。首先，巴登巴登位于德国西南部的巴登一符腾堡州黑森林国家公园内，这个位置使得小镇拥有优美的自然景观和丰富的森林资源。黑森林以其清新空气、宁静的环境和丰富的植物资源而闻名，这些都是康养旅游的理想条件。 其次，巴登巴登拥有丰富的温泉资源，这些温泉被广泛用于医疗和放松目的。温泉疗养是康养旅游的一个重要组成部分，它可以帮助人们放松身心，缓解压力，并且有助于治疗一些疾病。 再者，巴登巴登小镇不仅仅依靠自然资源，它还提供了多样化的休闲活动项目，如国际赛马会、世界舞蹈晚会和国际会议展览等。这些活动丰富了小镇的文化生活，吸引了更多的游客来此体验不同的文化和娱乐。 最后，巴登巴登小镇的历史和文化遗产也是其成为世界著名康养小镇的重要因素。小镇被誉为世界文化遗产，这意味着它拥有丰富的历史和文化价值，游客可以在这里体验到独特的文化…	德国巴登巴登小镇成为世界著名康养小镇的区位条件主要包括以下几个方面： 1. 地理位置优越：巴登巴登小镇位于德国西南部的巴登一符腾堡州黑森林国家公园内，周围环境清幽，空气清新，适宜居住和养生。同时，小镇距离法国和瑞士边界不远，交通便利，吸引了来自世界各地的游客。 2. 丰富的自然资源：小镇拥有丰富的自然资源，如森林、温泉等，这些资源为康养旅游提供了良好的基础。森林可以提供清新的空气和美丽的风景，温泉则具有疗养功效，吸引了大量寻求养生的游客。 3. 多样化的休闲活动：除了森林和温泉康养设施外，巴登巴登小镇还拥有国际赛马会、世界舞蹈晚会、国际会议展览等多类休闲活动项目，为游客提供了丰富多彩的休闲娱乐选择，使其成为人们远离城市喧嚣、放松身心的理想去处。 4. 完善的旅游服务：巴登巴登小镇拥有完善的旅游度假服务，包括各类酒店、餐饮、购物等设施，为游客提供了舒适便利的旅行体验，吸引了众多游客前来体验…	b	b	b	model_b	model_a	model_b
冰雹灾害是强对流天气系统引起的一种剧烈的气象灾害，是对流云中产生的球状或不规则冰块形式的降水，0℃层高度影响着冰雹的生成。地处青藏高原东北部的青海省，冰雹灾害多发。冰雹灾害突发性强,一旦发生往往造成较严重的雹灾,对农牧业生产、人类生活和生态系统带来严重影响。研究发现,降雹频次和持续时间与平均气温、气温日较差显著相	调查发现，近年来青海省的降雹频次和持续时间显著减少，分析主要原因。	我是赞同的，理由是全球气候变暖导致蒸发加剧，青海地区大气中水汽减少，同时近地面大气温度升高，0℃层高度也随之升高；受退耕还林还草等生态工程建设的影响，近年来青海省气温日较差减小，对流活动相对偏弱。	近年来，调查发现青海省的降冰雹频次和持续时间显著减少。这主要是由于强对流天气系统的减少，导致了降雹现象的减少。同时，气温日较差减小，也对减少降雹频次和持续时间起到了一定作用。另外，年均气温上升也是影响降雹的重要因素之一。	青海省加强了气象监测和预警工作，及时发布预警信息，有助于减少降雹的发生。	a	stud_a	青海省近年来降雹频次和持续时间显著减少的主要原因可能与全球气候变化和区域气候模式的变化有关。首先，全球气温上升导致0℃层高度上升，这可能减少了对流云中冰雹的生成条件。其次，青海省地处青藏高原东北部，气候特征为冷干，随着全球平均气温的上升，青海省的平均气温可能有所上升，这也可能降低了冰雹的生成概率。此外，区域气候模式的变化，如西伯利亚高压的强度变化，也可能影响到青海省的降水模式，进而影响冰雹的发生频率。 此外，研究还表明，气温日较差，即日最高气温与日最低气温之间的差值，显著影响冰雹的生成。随着气温日较差的减小，冰雹的生成条件也可能受到限制。因此，青海省降雹频次和持续时间的减少可能是多种气候因素共同作用的结果。	近年来青海省的降雹频次和持续时间显著减少的主要原因可能是气候变化影响。气候变化导致气温升高，0℃层高度可能上升，使得冰雹的生成条件变得不太容易达到。此外，气候变化也可能导致大气环流变化，减少了青海省遭受强对流天气系统的频率，从而减少了冰雹灾害的发生。除此之外，人类活动导致的环境污染也可能会对冰雹的生成产生一定的影响，如减少了冰核的数量，降低了冰雹发生的可能性。因此，气候变化和环境污染是导致青海省降雹频次和持续时间显著减少的主要原因之一。 。	a	b	b	model_a	model_a	model_b
冰雹灾害是强对流天气系统引起的一种剧烈的气象灾害，是对流云中产生的球状或不规则冰块形式的降水，0℃层高度影响着冰雹的生成。地处青藏高原东北部的青海省，冰雹灾害多发。冰雹灾害突发性强,一旦发生往往造成较严重的雹灾,对农牧业生产、人类生活和生态系统带来严重影响。研究发现,降雹频次和持续时间与平均气温、气温日较差显著相	说明冰雹灾害对青海省农牧业影响较大的原因。	冰雹降落会砸伤作物和牲畜，造成农业减产，此外冰雹灾害历时短且难以预测。	冰雹灾害对青海省农牧业影响较大的原因主要有两点。首先，冰雹灾害危害巨大，会破坏农作物和牧草，给农牧业带来严重损失。其次，冰雹灾害具有突发性强，往往来势迅猛，难以预防和避免。因此，农牧业在面对冰雹灾害时往往难以有效保护作物和牲畜。	冰雹灾害对青海省农牧业影响较大的原因包括：破坏力强、强度大；农牧业为主、规模普遍大；预防措施水平较低。	a	stud_a	冰雹灾害对青海省农牧业生产影响较大，主要原因如下： 1. 农作物损害：冰雹的落击可能导致农作物的叶片破裂、果实损伤甚至完全摧毁。例如，玉米、水稻、果树等作物在冰雹袭击后，可能会出现严重的减产甚至全产损失。 2. 牧业生产受阻：冰雹不仅会破坏牧场上的草地，还可能对牧草的生长造成长期影响。同时，冰雹还可能导致牲畜受伤或死亡，影响牧业生产的正常进行。 3. 生态系统破坏：冰雹灾害可能破坏生态系统的平衡，影响野生动植物的生存环境。例如，冰雹可能破坏植被，影响昆虫和小动物的栖息地，从而影响整个生态系统的健康。 4. 人类生活影响：冰雹灾害可能导致房屋和基础设施的损坏，影响居民的生活安全和生产生活秩序。农牧业生产受损后，可能会导致农牧民的收入减少，影响当地经济的稳定。 综上所述，冰雹灾害对青海省的农牧业生产、人类生活和生态系统都有着深远的影响。因此，了解冰雹灾害的形成机制和预测方法，对于减轻其对青海…	冰雹灾害对青海省农牧业影响较大的原因主要包括以下几个方面： 1. 损坏农作物和牲畜：冰雹灾害会直接摧毁农作物和牲畜，导致农田和牧场受损严重，降低了农牧业生产的产量和质量。例如，冰雹可能砸坏庄稼、果树和蔬菜，造成农作物大面积凋零，影响农民的收入来源。同时，冰雹对牲畜的伤害也会给畜牧业带来损失。 2. 破坏农业基础设施：冰雹灾害还可能破坏农业基础设施，如温室大棚、灌溉系统等，影响农业生产的正常进行。修复和重建这些设施需要投入大量资金和人力，给农业生产带来不小的困难。 3. 影响生态环境：冰雹灾害对生态系统造成破坏，破坏植被、土壤，影响水资源等，对生态环境造成一定程度的破坏，导致生态平衡受到破坏，进而影响农牧业生产的可持续发展。 4. 经济损失：冰雹灾害造成的损失不仅包括农业生产和牲畜损失，还包括因为灾害导致的市场价格波动、劳动力成本增加等因素，给农牧业带来经济上的巨大损失。 因此，冰雹灾害对…	tie	a	a	model_b	stud_a	stud_a
加拿大是一个汽车生产大国,汽车制造业的产量位居世界第六,但长期以来该国在吸引汽车投资方面一直落后于美国。2018年加拿大政府决定将安大略省打造为仅次于底特律的北美第二大汽车中心。2019年，新能源汽车领域的龙头车企——比亚迪汽车公司在加拿大汽车工业基地安大略省(位置如下图所示)开设了第一家汽车工厂,主要为多伦多市设计和组装电动公交车。2022年，该公司将在加拿大建设首个电动卡车组装工厂，建厂初期生产所需的零部件将从中国进口,这些材料未来将在加拿大采购,并将于2023年正式投产。	推测加拿大在吸引汽车投资方面一直落后于美国的原因。	与美国相比，加拿大纬度较高，导致用电和物流等成本偏高；加拿大人口较少，劳动力成本高；政府支持力度不够，本国消费市场较小，基础设施和产业协作能力相对较差。	加拿大在吸引汽车投资方面一直落后于美国的原因有三点。首先，资金不如美国充足。其次，市场需求没有美国广阔。最后，技术人才不如美国强大。	加拿大在吸引汽车投资方面一直落后于美国的原因包括：美国拥有先进的科研技术，市场较为广阔且汽车需求量大；加拿大的纬度较高，导致对外交通不便，同时气候条件也相对较差。	b	stud_b	加拿大在吸引汽车投资方面一直落后于美国的原因可能包括以下几点： 1. 政策和税收优惠：美国政府长期以来提供了诸如税收减免、补贴和其他激励措施来吸引汽车制造商投资。这些政策有助于降低企业的成本，提高其在美国的竞争力。 2. 成熟的供应链和基础设施：美国拥有一个成熟的汽车制造业基础设施和供应链网络，这为汽车制造商提供了稳定的生产环境和便捷的物流服务。相比之下，加拿大可能在这些方面还不够成熟。 3. 地理位置和市场优势：美国的广阔市场和地理位置使得汽车制造商能够更容易地出口产品到世界各地。美国的市场规模和潜力吸引了许多汽车制造商的投资。 4. 研发和创新环境：美国拥有世界级的研究机构和创新企业，这为汽车制造商提供了丰富的技术和研发资源。加拿大的研发和创新环境可能在某些方面不如美国。 5. 政治稳定和投资环境：美国的政治环境相对稳定，投资者对未来有较为清晰的预期，这有助于吸引长期投资。相比之下，…	加拿大在吸引汽车投资方面一直落后于美国的原因可能有多个方面。首先，美国拥有更大的市场规模和更多的消费者，对汽车制造商来说更具吸引力。其次，美国政府在汽车产业领域有更多的支持政策和补贴措施，吸引了更多的汽车投资。此外，加拿大的劳动力成本相对较高，对汽车制造商的投资也构成了一定的挑战。最后，加拿大的地理位置相对较偏远，与美国相比在物流和供应链方面可能存在一些不便之处。 举例来说，美国拥有多个汽车制造中心，如底特律、密歇根州等地，形成了完善的汽车产业集群，吸引了大量的汽车投资。相比之下，加拿大的汽车产业相对分散，缺乏类似规模和影响力的汽车制造中心。 综上所述，加拿大在吸引汽车投资方面一直落后于美国的原因包括市场规模、政策支持、劳动力成本以及地理位置等因素。随着加拿大政府采取措施打造汽车产业中心，未来可能会有所改善。 。	b	a	b	model_b	stud_a	model_b
加拿大是一个汽车生产大国,汽车制造业的产量位居世界第六,但长期以来该国在吸引汽车投资方面一直落后于美国。2018年加拿大政府决定将安大略省打造为仅次于底特律的北美第二大汽车中心。2019年，新能源汽车领域的龙头车企——比亚迪汽车公司在加拿大汽车工业基地安大略省(位置如下图所示)开设了第一家汽车工厂,主要为多伦多市设计和组装电动公交车。2022年，该公司将在加拿大建设首个电动卡车组装工厂，建厂初期生产所需的零部件将从中国进口,这些材料未来将在加拿大采购,并将于2023年正式投产。	简述加拿大吸引比亚迪公司投资建厂的主要区位优势。	工业基础良好，配套设施完善；政策支持力度大，优惠政策多；市场进入门槛低，营商环境友好；汽车产业历史悠久，人才众多；此外，还可以避开贸易壁垒，扩大市场份额。	加拿大具有吸引比亚迪公司投资建厂的主要区位优势。首先，作为汽车生产大国，加拿大拥有较好的产业基础。其次，加拿大拥有丰富的新能源资源和充足的原料供应。再者，加拿大经济较为发达，拥有先进的技术设备。此外，加拿大临近美国，市场需求广阔，为比亚迪公司提供了发展空间。最后，加拿大政府对新能源汽车产业有政策支持，为比亚迪公司在当地建厂提供了良好的政策环境。	加拿大具有吸引比亚迪公司投资建厂的主要区位优势。首先，加拿大地处靠近海洋，可实现陆海联运，交通条件优越，有利于产品的运输。其次，加拿大毗邻美国，靠近市场，便于产品销售。此外，加拿大政府对外资企业提供政策优惠和支持，为企业发展提供有力保障。最后，加拿大靠近美国，便于技术交流与合作，有利于企业在技术创新和发展方面取得更大进步。	b	stud_b	加拿大吸引比亚迪公司投资建厂的主要区位优势包括： 1. 丰富的自然资源：加拿大拥有丰富的自然资源，如水力资源、矿产资源等，这为汽车制造业提供了稳定的原材料供应。比亚迪在开设工厂时可以依赖当地的资源，减少对外部供应链的依赖。 2. 高素质劳动力：加拿大拥有高度教育水平的劳动力，特别是在安大略省，拥有众多的高等教育机构和专业技术人才，这对于汽车制造业来说是非常重要的。 3. 政策支持和税收优惠：加拿大政府为了吸引汽车制造业投资，提供了诸如税收优惠、补贴和其他激励措施。比亚迪在选择加拿大作为投资地点时，可能会受到这些政策的吸引。 4. 优越的地理位置：加拿大位于北美，地理位置便利，能够方便地将产品运输到美国和其他国家市场。同时，加拿大的交通网络也非常发达，适合汽车制造业的物流需求。 5. 环境友好政策：加拿大政府对新能源汽车和电动车产业有着积极的政策支持，提供了良好的发展环境。比亚迪作为新能源…	加拿大吸引比亚迪公司投资建厂的主要区位优势包括以下几点： 1. 地理位置优势：安大略省位于加拿大最繁荣的经济区域，毗邻美国底特律市，交通便利，有利于原材料和零部件的进出口，以及成品车辆的销售。 2. 劳动力优势：加拿大拥有高素质的劳动力，工人技术水平高，工作态度端正，这有助于提高生产效率和产品质量。 3. 政策支持：加拿大政府对新能源汽车产业给予了重要支持，包括财政补贴、税收优惠等政策，为企业提供了良好的发展环境。 4. 环境保护意识：加拿大作为一个环保意识较强的国家，对新能源汽车的发展有着积极的态度，这也符合比亚迪公司的发展理念。 5. 潜在市场需求：加拿大对于环保和节能的意识逐渐增强，新能源汽车市场需求潜力大，这为比亚迪公司在加拿大的发展提供了广阔的市场空间。	a	b	b	model_a	model_a	model_b
加拿大是一个汽车生产大国,汽车制造业的产量位居世界第六,但长期以来该国在吸引汽车投资方面一直落后于美国。2018年加拿大政府决定将安大略省打造为仅次于底特律的北美第二大汽车中心。2019年，新能源汽车领域的龙头车企——比亚迪汽车公司在加拿大汽车工业基地安大略省(位置如下图所示)开设了第一家汽车工厂,主要为多伦多市设计和组装电动公交车。2022年，该公司将在加拿大建设首个电动卡车组装工厂，建厂初期生产所需的零部件将从中国进口,这些材料未来将在加拿大采购,并将于2023年正式投产。	简述比亚迪公司为多伦多市设计的电动车需要重点突出的汽车性能及原因。	加拿大的抗寒能力和防滑能力较强；由于纬度较高，冬季漫长，气温极低；同时冬季冰雪天气频发，路面结冰期长。	为了适应多伦多市的气候条件，比亚迪公司设计的电动车需要特别注重防滑和防冻性能。这是因为加拿大纬度较高，道路容易结冰，为了保证行车安全，防滑性能至关重要。另外，加拿大的气候条件较差，电动车需要能够抵御严寒，因此防冻性能也是必不可少的。因此，这些性能的突出设计将确保电动车在多伦多市的使用中更加可靠和安全。	降低运营成本，提高整体效率。汽车油箱防凝冻可以保障车辆在寒冷天气下的正常运行，确保驾驶安全。	a	stud_a	比亚迪公司为多伦多市设计的电动公交车在性能上有几个重点突出的特点： 1. 环保性：作为新能源汽车的代表，电动公交车不排放尾气，对环境污染有显著减少的作用。特别是在多伦多这样人口密集的城市，减少尾气排放有助于改善空气质量，降低城市的环境压力。 2. 能源效率：电动车的能源转换效率远高于传统燃油车，尤其是当使用可再生能源如水力发电时。这种高效率有助于减少能源消耗，降低运营成本。 3. 安全性：比亚迪的电动公交车采用先进的电池技术和安全设计，确保在紧急情况下不会发生火灾或其他安全事故。这些设计符合或超过了国际安全标准。 4. 可靠性：电动车的机械结构相对简单，维护成本较低。电动公交车的设计旨在确保长时间、频繁运行的可靠性，满足城市公共交通的需求。 5. 适应性：电动公交车可以根据城市的需求进行定制，例如，通过调整电池容量和充电系统，可以适应不同路线的需求，确保车辆能够在有限的充电设施下正常运行…	比亚迪公司为多伦多市设计的电动车需要重点突出的汽车性能是环保和高效。这是因为多伦多作为加拿大最大的城市之一，面临着严重的空气污染和交通拥堵问题。电动车可以减少尾气排放，降低对环境的影响，同时提高能源利用率，减少能源消耗。因此，比亚迪公司设计的电动车在多伦多市需要具有高效的动力系统和优良的续航能力，以满足当地居民对环保和高效出行方式的需求。	tie	a	b	model_b	stud_a	model_b
加拿大是一个汽车生产大国,汽车制造业的产量位居世界第六,但长期以来该国在吸引汽车投资方面一直落后于美国。2018年加拿大政府决定将安大略省打造为仅次于底特律的北美第二大汽车中心。2019年，新能源汽车领域的龙头车企——比亚迪汽车公司在加拿大汽车工业基地安大略省(位置如下图所示)开设了第一家汽车工厂,主要为多伦多市设计和组装电动公交车。2022年，该公司将在加拿大建设首个电动卡车组装工厂，建厂初期生产所需的零部件将从中国进口,这些材料未来将在加拿大采购,并将于2023年正式投产。	推测比亚迪公司的电动卡车组装工厂在建厂初期生产所需的零部件将从中国进口的原因。	与加拿大相比，我国的劳动力和原料成本较低，汽车零部件生产成本也相对较低；由于国内产能过剩，从中国进口可以有效消耗国内的部分产能。	比亚迪公司的电动卡车组装工厂在建厂初期选择从中国进口生产所需的零部件有两个主要原因。首先，建设初期对当地供应商不够了解，因此选择从中国供应零部件可以保证质量较为稳定。其次，由于初期尚无足够资金积累，资金较为紧张，因此从中国供货相对便宜实惠。	原因是因为中国零部件生产量大，且便于运输，能够满足建厂初期所需。此外，建厂初期耗资耗能过大，且产业链不够完善。	a	stud_a	推测比亚迪公司的电动卡车组装工厂在建厂初期生产所需的零部件将从中国进口的原因可能包括以下几点： 1. 成熟供应链：中国作为比亚迪的家园地，拥有成熟的供应链网络，能够提供高质量的零部件。比亚迪可能已经与中国的供应商建立了长期合作关系，确保了零部件的可靠性和效率。 2. 技术优势：中国在新能源汽车领域拥有较强的技术研发能力，尤其是在电池、电机等关键零部件的研发方面。比亚迪可能希望利用中国的技术优势来确保其电动卡车的性能。 3. 成本效益：中国的生产成本相对较低，这对于初期生产来说可能是一个重要考虑因素。通过从中国进口零部件，比亚迪可以降低初期生产的成本，提高产品的竞争力。 4. 试生产和测试：在正式投产之前，比亚迪可能希望先在中国进行试生产和测试，以确保生产流程的稳定性和产品质量。通过这种方式，可以在正式投产前发现并解决潜在的问题。 5. 政策和贸易因素：中国与加拿大的贸易关系可能提供了更有…	比亚迪公司选择在建厂初期从中国进口零部件的原因可能是因为中国在新能源汽车领域具有领先的技术和成熟的供应链体系。中国拥有丰富的资源和便利的生产环境，能够提供高质量的零部件，并且这些零部件可能在其他国家难以找到或者价格更高。此外，中国与加拿大之间的贸易关系也可能使得进口零部件更加便捷和经济。最终，通过进口中国的零部件，比亚迪公司可以更快地建立起在加拿大的生产基地，并在2023年正式投产。 。	a	b	a	model_a	model_a	stud_a
私设“景点”即未经相关部门许可，违规为游客提供游览服务、违规开展旅游经营活动的景点,我国各地私设“景点”现象泛滥。2022年9月至11月,文化和旅游部在全国范围内开展私设“景点”问题专项整治工作。	说明我国各地私设“景点”现象泛滥的可能原因及私设“景点”对景区造成的危害。	可能原因是我国经济发展水平提高，导致旅游市场需求量大；现有正规景点总量偏少且收费高；现有各景点同质化严重，游客体验感较差；此外，开设景点的相关手续办理程序繁琐复杂，成本高；这些因素破坏了景区资源，导致景区生态环境恶化；缺少安全设施，游客生命财产安全得不到保障；存在不正当竞争，扰乱了正常旅游市场。	私设“景点”现象泛滥可能的原因包括就业岗位技术条件差、文化水平素养普遍低下、当地城管管理力度不强以及当地提供的就业岗位较少。私设“景点”对景区造成的危害包括破坏景区本来的服务功能、打破景区的规范程度和秩序、可能会造成环境破坏，以及传播与泛滥景区不良现象。	造成我国各地私设“景点”现象泛滥的可能原因主要包括政府相关部门监管力度较弱、小老板追求利益的心理较强以及景区管理力度不足。私设“景点”给景区带来的危害包括景区环境遭到污染、旅游景区经济发展受到限制以及景区知名度遭到破坏。	a	stud_a	私设“景点”现象泛滥的可能原因主要包括： 1. 经济利益驱动：一些个人或企业为了追求短期经济利益，未经相关部门许可，擅自将自己的房产、土地等作为旅游景点提供游览服务。他们可能认为通过提供旅游服务可以快速获得收益，而忽视了可能面临的法律风险和长远的负面影响。 2. 管理监管缺失：在一些地方，相关部门的监管力度不足，或者监管不严，导致私设“景点”者得以逃避法律的约束。这种情况下，违规经营者可能会认为自己可以在监管不严的环境中行事而不受惩罚。 3. 信息不对称：游客可能对当地的旅游资源缺乏足够的了解，容易被私设“景点”提供的低价优惠吸引，而不了解这些景点未经官方认证，可能无法提供安全和质量保证的旅游服务。 私设“景点”对景区造成的危害主要体现在以下几个方面： 1. 破坏景区的整体形象：私设的景点往往缺乏科学规划和合理管理，可能会破坏原有的自然景观和文化遗产，影响景区的整体美观和旅游体验。 2.…	可能原因包括： 1. 缺乏有效监管：有些地方的管理部门对私设“景点”的监管不到位，导致私设“景点”得以存在和发展。 2. 利益驱动：一些私设“景点”可能是为了牟取暴利而违规开展旅游经营活动，对于一些不法分子来说，这是一个赚钱的机会。 3. 缺乏规范意识：一些私设“景点”的经营者可能缺乏对法律法规的认识，或者对于维护景区环境和游客安全的重要性认识不足，从而私自擅自开展经营活动。 私设“景点”对景区造成的危害包括： 1. 安全隐患：私设“景点”可能没有经过专业机构的安全评估，存在安全隐患，一旦发生事故，可能导致人员伤亡。 2. 环境破坏：私设“景点”可能会破坏景区原有的生态环境，影响景区的生态平衡和景观质量。 3. 影响景区形象：私设“景点”可能经营混乱，服务质量低下，给景区形象带来负面影响，影响游客体验和景区的口碑。	tie	b	b	model_a	model_a	model_b
中蒙俄经济走廊是“一带一路”六大经济走廊中第一个规划实施的经济走廊，跨越中蒙俄三国多个地区。其地理环境复杂多样,生态环境脆弱敏感,是全球气候变化剧烈响应区和我国重要的生态安全保障区。为推进中蒙俄经济走廊的绿色高质量发展,基于生态经济区的生态环境和经济社会发展特征与地域分异规律,将其确定为优化发展区(经济发达、生态优良)、重点发展区(经济滞后、生态较好)和保育发展区(经济落后、生态脆弱)三类。下图示意中蒙俄经济走廊生态经济区绿色发展空间格局。	说明建设中蒙俄经济走廊对中国发展的积极影响,并针对中蒙俄经济走廊优化发展区、重点发展区、保育发展区的绿色可持续发展提出合理建议。	积极影响包括有利于提高中国外贸出口，增加外汇收入；促进中国与蒙古、俄罗斯的文化交流；拓宽能源进口渠道，保障中国能源安全；带动西北地区经济发展，有助于国家稳定；合理建议是进一步优化产业结构和发展模式，发展绿色、低碳的循环经济，实现人与自然的持续协调发展；维持社会经济稳定的基础上，避免对生态环境的进一步干扰和破坏；加强生态保育和修复，优先发展对生态干扰或破坏较小的绿色产业和生态产业，在生态保育中适度发展经济。	对中蒙俄经济走廊的建设对中国发展产生了积极影响，包括推动中国经济发展、促进中国生态环境保护、为中国发展提供机遇、促进和深化中国对外开放程度以及加强了与各国的联系，推进各个要素的流通。为了实现绿色可持续发展，建议在中蒙俄经济走廊的优化发展区中稳步推进经济发展，推动绿色产业发展，开发清洁能源。在重点发展区方面，可以依托优美环境发展旅游业和林业。对于保育发展区，应该建设生态自然保护区，适当发展旅游业和绿色产业。	对于中蒙俄经济走廊对中国发展的积极影响，首先可以促进两国的贸易往来，增加经济收益，同时也有利于促进中国与两地及周边地区的文化交流，互相学习。其次，经济走廊的开通加强了基础设施建设，带动了旅游业的发展，增加了经济收入，同时也加强了地区之间的联系。 为了实现中蒙俄经济走廊的绿色可持续发展，建议在优化发展区、重点发展区、保育发展区方面采取一些措施。首先，在生态脆弱地区应加强生态改善工作，如植树造林、种草等措施，以保护当地生态环境。其次，对地区的污染类产业进行严格管控，减少环境污染，确保生态环境的健康。最后，不断提高各地的生产创新力，推动产业结构调整优化，以绿色开放共享的原则促进绿色可持续发展。	b	stud_b	建设中蒙俄经济走廊对中国发展具有多方面的积极影响： 1. 经济合作加深：中蒙俄经济走廊的建设促进了三国之间的经济合作，加强了区域内的贸易往来和投资流动，提升了区域经济的整体竞争力。 2. 促进区域一体化：走廊的建设有助于推动亚欧大陆东部和西部的经济一体化，增强区域内的互联互通，促进了区域经济的平衡发展。 3. 绿色发展模式：通过将中蒙俄经济走廊划分为优化发展区、重点发展区和保育发展区，并提出相应的绿色可持续发展建议，可以有效地实现经济发展与生态保护的平衡，推动绿色发展模式的形成。 针对不同类型的区域，以下是针对绿色可持续发展的合理建议： 1. 优化发展区（经济发达、生态优良）： - 加强环境监管和保护措施，确保生态环境的持续优良。 - 推广清洁能源技术，鼓励使用可再生能源，减少对化石燃料的依赖。 - 促进绿色产业发展，如环保材料、节能产品等，提升产业结构的绿色水平。 - 实施高质量的城市…	建设中蒙俄经济走廊对中国的积极影响包括：促进区域经济合作与发展、增加贸易往来、提升基础设施建设、推动产业升级与技术创新、拓展市场空间等。在优化发展区方面，可以加强生态环境保护，推动绿色产业发展，鼓励科技创新，提高资源利用效率。在重点发展区方面，可以加强基础设施建设，支持农业现代化，推动教育与培训，促进就业机会。在保育发展区方面，可以加强生态环境保护，推动生态旅游业发展，实施生态补偿机制，促进当地居民可持续发展。综合来看，通过合理规划和管理，中蒙俄经济走廊可以为中国的可持续发展提供更多机遇和动力。 .	tie	tie	a	model_a	model_a	stud_a
瑞典驯鹿养殖地区位于瑞典北部,主要采取半驯养和游牧方式。驯鹿夏季以高山植被为食，冬季则以波罗的海沿岸积雪下的地衣过冬，植物绿芽是驯鹿的优质牧草。气候变化对瑞典驯鹿夏季和冬季牧草萌芽时间早晚存在潜在影响。甲图示意瑞典驯鹿牧区的分布范围(阴影区域,其中深色阴影区域为高山地区),乙图示意某种理论模型下对瑞典21世纪末的气候各月变化的预测。	说明瑞典的自然环境特征。	该地区以温带大陆性气候为主，冬季寒冷，夏季温和，冬季南北温差较大；由于地形影响，降水量西多东少，降水季节分配较均匀；地势西北高、东南低；植被主要为亚寒带针叶林；河流短小流急，水量丰沛，通航价值低，水能资源丰富，河流有较长的结冰期。	瑞典的自然环境特征包括地中海气候，夏季少雨，冬季温和湿润。地形以山地平原为主，地势北高南低。由于纬度较高，气候寒冷。境内存在波罗的海，食物来源丰富。植被以寒带针叶林为主。	①气候为温带海洋性气候、温和湿润、降水平均②地形南低北高、气温平均多雨雪天气.③植被在夏秀为高山植被，冬季为地衣．主要以温带落叶阔叶林	a	stud_a	瑞典位于北欧，北纬60°至70°之间，拥有典型的北纬高纬度地理环境。其自然环境特征主要包括： 1. 气候：瑞典的气候属于温带和亚寒带气候，四季分明，冬季寒冷且漫长，夏季相对较短而温和。随着纬度的增加，气候逐渐变冷，北部地区的冬季可以持续数月。 2. 地形：瑞典地形多样，包括山脉、丘陵、平原和湖泊。北部的山脉如斯卡夫山脉和北部山脉等，为驯鹿提供了高山草甸的栖息地。 3. 植被：瑞典的植被随着纬度和海拔的变化而变化。北部地区的植被较为稀少，主要是低矮的灌木和草本植物，而南部地区则有更丰富的森林和草甸。 4. 水资源：瑞典拥有众多的湖泊和河流，尤其是北部地区的许多湖泊和河流在冬季冻结，成为驯鹿冬季食物的重要来源。 5. 动物：瑞典的野生动物种类繁多，包括驯鹿、灰熊、狼、狐狸等。驯鹿是瑞典北部的标志性动物，主要分布在高山地区。 6. 气候变化：瑞典正面临着全球气候变化的影响，导致温度上升、降水模…	瑞典的自然环境特征包括北部地区的高山植被和波罗的海沿岸的积雪地衣，这些地区为驯鹿提供了夏季和冬季的食物来源。瑞典的气候变化也对驯鹿的生存环境产生影响，可能导致牧草萌芽时间的变化。此外，瑞典北部的地理位置也使得该地区更容易受到极端气候事件的影响，需要采取相应的应对措施来保护驯鹿的生存环境。	a	a	a	model_a	stud_a	stud_a
埃及开罗是世界上最拥挤的城市之一,目前拥有约2400万人,预计到2050年将超过4 000 万人。2015 年 3月，埃及政府宣布在开罗以东 45 千米的沙漠空地上建造新首都，面积几乎是开罗的两倍,政府主要通过土地销售来抵消新首都的建设成本。2017年10月11日,中国建筑股份有限公司和埃及住房、公共工程与城市化部签署了埃及新首都商务区项目总承包含同。从2021年12月1日起，新首都开始为期6个月的“试运营”。下图示意埃及新首都地理位置及周边地区。	分析埃及新首都选址的优势条件。	该地区距离开罗较近，有利于承担人口及产业转移；位于沙漠空地，用地充足；距离苏伊士运河较近，便于物资转运。	1. 面积较大，有利于规划和发展。 2. 地处有利于海运和河运，便于与世界各地进行贸易往来。 3. 沙漠空地修建成本较低，有利于节约建设资金。	①选址于临海和运河地带，有利于商品贸易和经济发展。②运河和海路交通发达，便利了交通。	a	stud_a	埃及新首都选址的优势条件主要体现在以下几个方面： 1. 空间扩展：新首都位于开罗以东45千米的沙漠地区，面积几乎是开罗的两倍，这为城市的发展提供了广阔的空间，能够有效缓解开罗的过度拥挤问题，提供更多的居住和办公空间。 2. 政策支持：埃及政府通过土地销售的方式来抵消新首都的建设成本，这意味着政府在政策上给予了新首都建设充分的支持和资源，确保了项目的顺利进行。 3. 国际合作：中国建筑股份有限公司与埃及住房、公共工程与城市化部签署了埃及新首都商务区项目总承包合同，体现了国际合作的优势。中国在城市规划和建筑领域的经验和技术可以帮助新首都更快地实现发展目标。 4. 试运营阶段：从2021年12月1日起，新首都开始了为期6个月的试运营阶段，这有助于政府和建设方评估城市基础设施的运作情况，及时调整和优化城市规划，以确保城市的长期可持续发展。 5. 地理位置：新首都位于开罗以东，虽然距离开罗有一定距…	埃及新首都选址的优势条件包括以下几点： 1. 地理位置优越：新首都选址于开罗以东 45 千米的沙漠空地，这个位置较开罗更为靠近埃及的主要机场和主要交通枢纽，便于人员和物资的流动，也有利于新首都与其他城市的联系。 2. 空间充裕：新首都的面积几乎是开罗的两倍，有更多的空间来规划和建设城市基础设施，同时也有利于新首都的城市扩张和人口增长。 3. 沙漠空地可开发性强：沙漠空地的开发成本相对较低，而且可以根据规划要求进行灵活的设计和建设，有利于打造一个现代化、宜居的城市。 4. 土地销售弥补建设成本：政府通过土地销售来抵消新首都的建设成本，这样可以减轻财政压力，有助于新首都的可持续发展。 5. 合作项目带来技术和资金支持：与中国建筑股份有限公司合作签署的商务区项目总承包合同，将为新首都带来技术和资金支持，促进项目的顺利实施和发展。 综上所述，埃及新首都选址的优势条件有利于新首都的发展和建设，为其…	tie	a	a	model_b	stud_a	stud_a
埃及开罗是世界上最拥挤的城市之一,目前拥有约2400万人,预计到2050年将超过4 000 万人。2015 年 3月，埃及政府宣布在开罗以东 45 千米的沙漠空地上建造新首都，面积几乎是开罗的两倍,政府主要通过土地销售来抵消新首都的建设成本。2017年10月11日,中国建筑股份有限公司和埃及住房、公共工程与城市化部签署了埃及新首都商务区项目总承包含同。从2021年12月1日起，新首都开始为期6个月的“试运营”。下图示意埃及新首都地理位置及周边地区。	推测埃及新首都建设面临的主要困难。	新首都位于沙漠地带，自然环境恶劣；水资源消耗量大，水资源压力大；建设规模大，建设资金不足；通过土地销售来抵消新首都的建设成本，可能会推高入住成本。	1. 位于地中海地区，受地中海气候影响，夏季炎热干燥，不利于工程施工。 2. 面临运输货物困难，需要大量物资和建设，物流成本较高。 3. 工程建设需要高素质的人员，但工作人员素质普遍较低，难以保质保量完成工作。	1. 沙漠气候的恶劣条件增加了新首都建设的施工难度。 2. 资金和技术的短缺是新首都建设面临的主要困难之一。 3. 缺乏有经验的工人也是一个挑战，可能影响工程的进展。	b	stud_b	埃及新首都建设面临的主要困难可能包括： 1. 环境挑战：开罗以东的沙漠地区环境条件较为恶劣，缺水、极端气候变化等问题可能会对新首都的基础设施建设和居民生活造成影响。 2. 人口迁移与社会适应：将大量人口从开罗迁移到新首都将是一个巨大的社会工程挑战，包括住房供应、教育、医疗、就业等方面的适应问题。 3. 经济负担：新首都的建设成本高昂，政府主要通过土地销售来抵消成本，这可能会导致土地价格上涨，影响社会公平性，并可能引发房地产市场的不稳定。 4. 技术和管理难题：在沙漠地区建设一个现代化的首都需要高级的技术和管理能力，包括水资源的引进和利用、城市规划、交通系统的设计等。 5. 地缘政治考量：新首都的建设可能会涉及到多个利益相关者，包括政府、企业、居民等，如何平衡这些利益并确保项目顺利进行是一个挑战。 6. 国际合作与资金筹集：虽然中国建筑股份有限公司参与了新首都的商务区项目，但国际合作和资金…	埃及新首都建设面临的主要困难可能包括但不限于以下几点： 1. 资金问题：新首都的建设成本巨大，政府主要依靠土地销售来抵消建设成本，但可能会出现资金短缺的情况，导致建设进度受阻。 2. 基础设施建设困难：新首都的建设需要大规模的基础设施建设，包括道路、供水、供电等，这些建设可能会受到地理环境的限制和挑战，增加建设难度。 3. 人口迁移问题：随着新首都的建设，可能会引发大量人口迁移至新首都附近，这将给当地的社会管理、就业、教育、医疗等方面带来巨大压力。 4. 环境保护问题：新首都的建设可能会对周边环境造成影响，包括生态破坏、水资源浪费、空气污染等问题，需要采取有效措施来保护环境。 5. 政治稳定问题：新首都的建设需要政府的支持和稳定的政治环境，政治动荡可能会影响建设进程和投资环境。 .	a	b	a	model_a	model_a	stud_a
湛江东海岛位于雷州半岛东侧,降水集中在5~10月,夏季盛行偏东风,冬季盛行偏北风。该岛东海岸发育有近20 km的砂质海滩,海滩后缘为几道高大的海岸沙堤,沙堤东部生长着优良的海边固沙植物-老鼠书,老鼠节草丛沙堆(是沙粒在风力作用下遇到草丛阻拦后堆积形成的一种典型地貌,形态多为蝌蚪形和锥形)分布集中。下图示意东海岛地理位置和海滩草丛沙堆分布。	简述东海岛草丛沙堆的分布特征。	该地区的植被主要呈条带状沿海岸线平行分布；主要分布在海岸沙丘与沙滩之间；东北部分布数量较西南部少。	东海岛草丛沙堆的分布特征包括：分布在涉堤区域、间隔比较密集、多在3～5米之间、多形成在背风坡。	东海岛草丛沙堆的分布特征主要表现为不均匀，主要分布在3~7m之间，呈西南至东北走向。分布比较集中，多集中在距离海岸20~60m之间。	b	stud_b	东海岛草丛沙堆的分布特征主要体现在以下几个方面： 1. 地理位置：草丛沙堆主要分布在东海岛的海岸沙滩后缘，沿着几道高大的海岸沙堤线分布。这些沙堤是由于风力和海浪的作用下形成的自然屏障。 2. 形成原因：这些草丛沙堆是由于风力作用下沙粒在遇到草丛阻拦时堆积形成的。这种地貌形态多为蝌蚪形和锥形，体现了风力作用下沙粒堆积的特征。 3. 集中分布：草丛沙堆在东海岛的某些区域集中分布，这可能与当地的风向和风速有关。夏季盛行偏东风可能有助于沙粒在这些区域的积累。 4. 植被覆盖：沙堆东部生长着优良的海边固沙植物，如老鼠书，这些植物有助于固定沙土，减缓沙子的侵蚀，进一步加强了草丛沙堆的稳定性。 综上所述，东海岛草丛沙堆的分布特征体现了风力作用下沙粒堆积的自然地貌形成过程，同时也反映了当地风向、风速和植物生长的影响。	东海岛草丛沙堆的分布特征主要表现在以下几个方面： 1. 分布集中：草丛沙堆主要分布在东海岛的海岸沙堤东部，占据了较大的面积。 2. 形态多样：草丛沙堆的形态多为蝌蚪形和锥形，这是由于沙粒在风力作用下遇到草丛阻拦后堆积形成的典型地貌。 3. 植被丰富：草丛沙堆生长着优良的海边固沙植物-老鼠书和老鼠节草，这些植物有助于固定沙丘，保护海岸线免受风蚀侵蚀。 4. 占据重要位置：草丛沙堆的存在对维护海滩生态平衡、防止海岸侵蚀具有重要意义。	a	b	a	model_a	model_a	stud_a
平陆三湾大天鹅景区位于山西平陆黄河湿地国家级自然保护区，是濒危种国家1级重点保护动物大天鹅和其他水禽(如灰鹤和苍鹭等)的重要越冬地。该景区游客数量季节变化大。每年11月底到次年2月,大天鹅成群结队从繁殖地陆续迁徙到三门峡越冬,吸引了众多的游客和摄影爱好者。下图示意平陆三湾大天鹅景区文化服务需求(指一定时期和一定范围内人类实际使用和消费的产品和服务总和)总量等级分布。	指出影响平陆三湾大天鹅景区文化服务需求分布的主要因素,并分析该景区游客数量季节变化大的原因。	主要因素包括经济消费水平和与景区的距离；受大天鹅迁徙周期的影响，景区的文化服务供给能力具有季节性周期变化特点；黄河径流量的季节变化大，影响湿地景观的观赏；大天鹅湿地景区为国家级自然保护区，其他人工景点少，游客人数少。	地形和水文是影响平陆三湾大天鹅景区文化服务需求分布的主要因素。冬季是大天鹅成群越冬的最佳时期，给景区带来了游客数量季节变化大的原因。这是因为冬季大天鹅的壮丽景象吸引了各种类型的游客，他们对文化服务水平有着中等需求，对大天鹅充满了兴趣。此外，冬季正值春节前后，游客的工作时间安排得以安排观赏旅游。而大天鹅的生活习性以及政府对大天鹅保护工作的积极推动也是吸引游客的原因。最重要的是，景区自然保护工作到位，让游客在保护环境的同时享受大天鹅的美丽。	影响平陆三湾大天鹅景区文化服务需求分布的主要因素包括该地的接待条件和基础设施条件、经济发展水平以及动物所迁徒位置。其中，景区游客数量季节变化大的原因可能是由于季节性景观变化、气候条件以及动物迁徙等因素造成的。	b	stud_b	影响平陆三湾大天鹅景区文化服务需求分布的主要因素包括： 1. 季节性迁徙：大天鹅的越冬行为直接影响了景区的游客数量。每年11月底到次年2月，大天鹅从繁殖地迁徙至三门峡越冬，这个时期游客数量会显著增加。摄影爱好者和鸟类观察者也会聚集在此地，进一步推高了游客数量。 2. 生态环境：作为黄河湿地国家级自然保护区的一部分，平陆三湾大天鹅景区提供了一个理想的生态环境，吸引了众多水禽，包括灰鹤和苍鹭等。这种丰富的生物多样性也是景区文化服务需求的重要因素。 3. 促销活动和旅游政策：当地政府和旅游部门可能会开展各种促销活动和旅游政策，以吸引游客，增加景区的文化服务需求。 4. 交通便利性：景区的交通状况也会影响游客数量。交通便利的景区更容易吸引游客，而交通不便的景区则可能会导致游客数量减少。 至于平陆三湾大天鹅景区游客数量季节变化大的原因，可以归结为大天鹅的季节性迁徙行为。这种迁徙行为导致了游客数量的…	影响平陆三湾大天鹅景区文化服务需求分布的主要因素包括大天鹅迁徙季节、气候条件、景区设施和服务水平等。大天鹅迁徙季节是一个重要的因素，因为在11月底到次年2月这段时间，大天鹅聚集在景区越冬，吸引了大量游客和摄影爱好者。气候条件也是影响因素之一，冬季时节黄河湿地的气温适宜，景色宜人，吸引了更多游客前来观赏大天鹅。此外，景区设施和服务水平也会影响文化服务需求分布，如果景区设施完善、服务质量高，游客体验会更好，吸引更多游客。 该景区游客数量季节变化大的原因主要是因为大天鹅迁徙季节的特殊性。在11月底到次年2月这段时间，大天鹅成群结队迁徙到三门峡越冬，这是景区最吸引人的时候，也是游客最多的时候。由于大天鹅是国家1级重点保护动物，其迁徙季节吸引了众多游客和摄影爱好者前来观赏，导致景区在这个季节的游客数量激增。另外，冬季时节黄河湿地的气温适宜，景色优美，也是吸引游客的原因之一。 。	tie	b	b	model_a	model_a	model_b
天山中山带海拔 1600~2800 m之间分布有带状的雪岭云杉林，研究人员通过考察云杉林带生物量积累的具体过程和影响因素，获得天山雪岭云杉林带生物量随海拔的变化，并发现自西南向东北天山雪岭云杉林带生物量呈降低趋势。	描述天山云杉林带生物量的垂直变化特征。	随着海拔的升高，云杉林带的生物量呈现先增加后减少的“单峰”变化；最大值出现在海拔 2100～2400 m 处，最小值出现在 1500~1800 m处。	天山云杉林带生物量的垂直变化特征表现为不均匀，主要集中在海拔2100米到2800米之间，而在海拔较低处数量较少。	天山云杉林带生物量的垂直变化特征表现为随着海拔的增加而增加，北支夫山生物量较多，而南交天山生物量较少。总体来看，这种垂直分布不均，北部地区的生物量较多，而南部地区的生物量较少。	a	stud_a	天山云杉林带生物量的垂直变化特征主要体现在随着海拔的升高，生物量逐渐减少。研究表明，天山中山带的雪岭云杉林分布在海拔1600~2800米之间。在这个海拔范围内，云杉林带的生物量随着海拔的上升而呈现出一个逐渐降低的趋势。 具体来说，海拔较低的地区（如1600米左右），云杉林带的生物量较高，因为这里的气候条件更适宜植物生长，光照充足，温度适宜，水分供应充足，这些都有利于植物的生长和生物量的积累。随着海拔的上升，气候条件逐渐恶化，光照减弱，温度降低，水分供应减少，这些都对植物生长产生了负面影响，从而导致生物量的减少。 例如，在海拔2000米左右，云杉林带的生物量可能会比海拔1600米的生物量低约20%；而在海拔2800米的高海拔地区，生物量可能会进一步减少，可能低于海拔2000米的生物量。这种垂直变化的生物量特征反映了植物生态系统对环境因素的响应，以及海拔变化对植物生长的影响。	根据研究结果显示，天山中山带海拔 1600~2800 m之间的雪岭云杉林带生物量呈现出一定的垂直变化特征。通常来说，随着海拔的增加，云杉林带的生物量会逐渐降低，这是由于海拔对气温、降水量、光照等因素的影响导致植被生长条件逐渐变差所致。在天山雪岭云杉林带中，自西南向东北的方向，生物量也呈现逐渐降低的趋势，这可能与气候、土壤条件等因素在不同方向上的差异有关。 在较低海拔处，云杉林带的生物量可能较高，因为气温适宜、降水充足，植被生长条件较好，但随着海拔的增加，气温逐渐降低、降水量减少，植被生长受到限制，导致生物量逐渐减少。因此，天山云杉林带的生物量在垂直方向上呈现出递减的特征。 总的来说，天山雪岭云杉林带的生物量随着海拔的增加呈现出逐渐降低的趋势，同时在不同方向上也存在一定的差异。这些特征反映了气候、土壤、植被等因素在垂直方向上的变化对云杉林带生物量的影响。 。	tie	a	b	model_b	stud_a	model_b
天山中山带海拔 1600~2800 m之间分布有带状的雪岭云杉林，研究人员通过考察云杉林带生物量积累的具体过程和影响因素，获得天山雪岭云杉林带生物量随海拔的变化，并发现自西南向东北天山雪岭云杉林带生物量呈降低趋势。	说明南支天山南坡缺失云杉林的原因。	南支天山南坡处于西风带背风坡，降水较少；南支天山南坡处于阳坡，太阳辐射强，土壤水分蒸散量大，含水量少，不能满足云杉林生长的水分需求，因此未出现云杉林。	南支天山南坡缺失云杉林的原因主要有三个：首先，南支天山的纬度较北支天山低，这不利于云杉的生长；其次，南支天山南坡的海拔较低，也不利于云杉的生长；最后，由于人类不合理的采伐，导致了云杉林的减少。	南支天山南坡缺失云杉林的原因是多方面的。首先，南坡位于盆地边缘，热量较高且水含量低，这种气候条件并不适宜云杉林的生长。其次，南坡处于冬季风的背风坡，高大的山脉阻挡了冷空气的扩散，使得气温相对较高，而云杉林喜湿不耐热，对这种气候条件也不适应。因此，南支天山南坡缺失云杉林的主要原因在于区域气候的不适宜。	b	stud_b	在南支天山南坡上，可能存在多种因素导致缺失云杉林带。首先，气候条件可能是主要原因。南坡通常比北坡更受日照影响，温度可能更高，降水量可能更少，这可能不利于云杉林的生长。另外，南坡的植被可能更容易受到干旱和极端气候事件的影响，这可能导致云杉林的生存环境变得不适宜。 其次，地理和地形因素也可能起到作用。南坡的坡度可能更陡峭，土壤侵蚀更严重，这可能导致土壤质量下降，影响云杉林的生长。同时，南坡可能有更多的人类活动，如农业开发和牧业放牧，这些活动可能破坏了原有的植被结构，导致云杉林的缺失。 最后，生物学因素也不能忽视。云杉作为一种特定的树种，可能对特定的生境有较高的适应性要求。如果南坡的生境条件与云杉的适应范围不符，那么云杉林的形成和维持将变得困难。 综上所述，南支天山南坡上云杉林的缺失可能是由气候、地理、地形和生物学因素综合作用的结果。这些因素可能相互作用，共同影响了云杉林的分布和生存。	南支天山南坡缺失云杉林的原因可能是由于气候和环境因素的影响。南支天山南坡地处低纬度地区，受到暖湿气流的影响，相对来说气温较高，降水较多，这些条件并不适宜云杉的生长。云杉通常生长在海拔较高的地区，对温度和湿度有一定的要求，南支天山南坡的气候条件可能并不符合云杉的生长需求。此外，南支天山南坡地形复杂，地势陡峭，土壤贫瘠，这也会对云杉的生长产生不利影响。 举例来说，南支天山南坡的昼夜温差可能较大，这种气候条件并不适合云杉的生长，云杉更适合生长在气温较为稳定的高海拔地区。另外，南支天山南坡的降水量可能过多或不均匀，也会对云杉的生长造成影响。总体来说，南支天山南坡的气候和环境条件并不适合云杉的生长，这可能是造成缺失云杉林的主要原因。 。	a	b	tie	model_a	model_a	model_b
天山中山带海拔 1600~2800 m之间分布有带状的雪岭云杉林，研究人员通过考察云杉林带生物量积累的具体过程和影响因素，获得天山雪岭云杉林带生物量随海拔的变化，并发现自西南向东北天山雪岭云杉林带生物量呈降低趋势。	分析自西南向东北天山云杉林带生物量呈降低趋势的原因。	从南到北，云杉林带所处的纬度逐渐升高，热量逐渐减少；从西到东，云杉林带的年降水量逐渐减少；受热量和降水的共同影响，从西南向东北，云杉林带的生物量逐渐降低。	分析表明，西南向东北天山云杉林带生物量呈降低趋势的原因有三点。首先是由于纬度逐渐提高，植物在东北地区获得的太阳辐射较少，不利于光合作用，从而阻碍了生长。其次，西南地区与东北地区在地形和气候条件上存在较大差异，西南地区水热条件充足，生长环境适宜，而东北地区气候干燥，不利于云杉林的生长。最后，西南地区处于谷地，水源条件优越，而东北地区水源大渗严重，土壤中水分含量低，肥力差，也限制了云杉林的生长。	西南向东北天山云杉林带生物量呈降低趋势的原因包括：随着纬度增大，气温变低，不利于生物生存；海拔较低导致环境条件相对恶劣；位于山脉背风坡，降水较少；土壤面积小，松树被白雪覆盖，影响光合作用和生长发育。	b	stud_b	天山云杉林带生物量随海拔升高而呈现降低趋势，这一现象可能由多种因素共同作用引起。首先，海拔的增加意味着气候条件的变化，温度降低、降水量减少和光照时间缩短，这些都对植物生长产生负面影响。随着海拔的升高，云杉林带的生长季节缩短，光合作用效率降低，导致生物量积累减少。 其次，海拔越高，土壤质量和营养含量通常会随之下降。土壤的酸化和营养元素的稀释会限制植物的生长和生物量的积累。例如，高海拔地区的土壤可能缺乏足够的养分来支持云杉的快速生长。 再者，高海拔地区的风力和极端气候条件也可能对云杉林带的生物量积累产生影响。强风可能导致树木的死亡和生物量的损失，而极端的低温和干旱则可能限制植物的生长和繁殖。 此外，自西南向东北的天山山脉可能存在地理和气候的渐变，这也可能影响生物量的分布。例如，西南坡可能比东北坡更受阳光照射，导致西南坡的云杉林带生物量比东北坡更高。 总之，天山云杉林带生物量随海拔降低的趋势可…	天山云杉林带生物量自西南向东北呈降低趋势可能受到多种因素的影响。其中，主要原因可能包括以下几点： 1. 气候因素：随着海拔的升高，气温会逐渐降低，降雨量和光照强度也会有所减少，这些气候条件不利于植物的生长和生物量的积累。 2. 土壤质量：随着海拔的增加，土壤的质量和肥力可能会逐渐减弱，导致植物吸收养分和水分的能力下降，从而影响了生物量的积累。 3. 物种竞争：在高海拔地区，植被种类可能更加单一，不同植物物种之间的竞争会加剧，导致生物量减少。 4. 人为活动：人类的开发活动、砍伐和放牧等行为也会对天山云杉林带的生态环境造成影响，进而导致生物量的降低。 综上所述，天山云杉林带生物量自西南向东北呈降低趋势可能是气候、土壤质量、物种竞争以及人为活动等多种因素综合作用的结果。 。	a	b	tie	model_a	model_a	model_b
沙丁鱼适宜的水温范围为14~20℃。生活在非洲最南端厄加勒斯浅滩渔场的沙丁鱼每年5月至9月的迁徙吸引了大批游客前往观赏	说明厄加勒斯浅滩渔场的成因。	寒暖流交汇，海水扰动，底层营养物质上泛，浮游生物生长繁盛，鱼类饵料丰富；寒暖流交汇处形成水障，促进鱼群集聚；位于近海大陆架海域，有陆地淡水汇入，营养盐类丰富，浮游生物繁盛；海水较浅，光照条件好，有利于浮游生物进行光合作用。	厄加勒斯浅滩渔场之所以形成，原因如下：首先，该地有洋流经过，带来丰富的饵料，并形成一个上升滚，为鱼类提供了充足的食物来源；其次，该地位于纬度较低，温度较高，有利于鱼类生存；再者，生存空间广阔，为鱼类提供了良好的生存环境；最后，由于受人类活动影响小，污染程度也较小，使得渔场的生态环境相对较好。	①寒暖交汇处，使水域温度稳定。②该渔场位于大陆架上，海水较浅，有利于吸收阳光。③流滩地区土壤肥沃，使大量浮游生物在此繁殖。④河流海口处，水体营养丰富，为鱼类提供大量饵料。	a	stud_a	厄加勒斯浅滩渔场位于非洲最南端，是由特定的地理和气候条件共同作用形成的。首先，厄加勒斯浅滩位于南非的西海岸，靠近开普点塔山脉，这个山脉阻挡了来自南方的冷水，导致该地区的海水相对较暖。其次，开普点塔山脉的海岸线曲折，形成了许多半岛和海湾，这些地形特征导致了水流的分散和复杂，形成了许多适宜沙丁鱼栖息的浅滩。 沙丁鱼适宜的水温范围为14~20℃，厄加勒斯浅滩渔场恰好位于这个温度范围内，因此成为了沙丁鱼的理想栖息地。在每年5月至9月，沙丁鱼会在这个区域进行迁徙，形成壮观的鱼群，这一现象吸引了大量的游客前来观赏。	厄加勒斯浅滩渔场的形成是由于多种因素共同作用的结果。首先，该地区地质构造复杂，地形起伏，海底地形呈现出较大的梯度变化，这为沙丁鱼提供了适宜的生存环境。其次，该地区潮汐变化较大，潮流湍急，这有利于搅动水体，提供了适宜的氧气和食物来源。此外，暖湿的季风气候也为沙丁鱼提供了适宜的生长环境。最后，沙丁鱼在这里繁衍生息，形成了一个独特的渔场。这些因素共同作用，使得厄加勒斯浅滩渔场成为沙丁鱼的理想栖息地。	b	a	a	model_b	stud_a	stud_a
沙丁鱼适宜的水温范围为14~20℃。生活在非洲最南端厄加勒斯浅滩渔场的沙丁鱼每年5月至9月的迁徙吸引了大批游客前往观赏	推测沙丁鱼每年5月至9月向德班附近海域迁徙的原因。	从5月至9月，随着太阳直射点的北移，气压带和风带也随之北移；德班附近海域（非洲30°40°S大陆东侧海域）受西北风控制，盛行离岸风，引发上升流；深层海水上泛导致浮游生物繁盛，饵料丰富；西风漂流加强，厄加勒斯浅滩渔场水温降低，沙丁鱼向水温适宜的东岸海域迁徙。	沙丁鱼每年5月至9月向德班附近海域迁徙的原因是因为此时南北半球处于秋冬季节，气温寒冷，水域温度较低，不利于鱼类生存。同时，盛行中纬雨风，强风大浪也不利于鱼类繁殖。而德班附近海域的水温适宜沙丁鱼生存，且在这个时候天敌较少，相对安全，因此沙丁鱼选择在这里生长。	沙丁鱼每年5月至9月向德班附近海域迁徙的原因可能是因为当地这个时候处于冬季气候寒冷，低纬度地区温度较高，适宜生存。同时，5月至9月期间气压带和风带北移，受西北风影响较大，而德班受西风北影响较小，这也可能是吸引沙丁鱼迁徙的原因之一。此外，从六月至九月，太阳向赤道移动，德班光照充足，适宜鱼类生存，也可能是沙丁鱼选择这个时候迁徙的原因之一。	b	stud_b	推测沙丁鱼每年5月至9月向德班附近海域迁徙的原因与它们适宜的水温范围有关。在这个时期，南非沿海的水温通常会升高，接近或超过沙丁鱼的适宜水温范围（14~20℃），为它们的生长和繁殖提供了理想的环境条件。 此外，厄加勒斯浅滩渔场在这个季节可能会出现丰富的食物资源，吸引沙丁鱼聚集。这种食物丰富的环境有利于沙丁鱼的繁殖和后代的成长。游客们被这些壮观的鱼群吸引，来到现场观赏，形成了一个重要的旅游活动。	沙丁鱼每年5月至9月向德班附近海域迁徙的原因可能是因为德班附近海域的水温适宜，符合沙丁鱼的生存需求。在这个时间段，水温可能在沙丁鱼适宜的14~20℃范围内，使得它们能够更好地生存和繁殖。此外，德班附近海域可能还有丰富的食物资源，吸引沙丁鱼迁徙至该地区觅食。另外，沙丁鱼在迁徙过程中可能还会遇到其他海洋生物，形成壮观的迁徙景观，吸引了大量游客前往观赏。 举例来说，沙丁鱼可能会选择德班附近海域迁徙是因为在那里它们可以找到大量的浮游生物作为食物，同时水温也适宜它们的生长和繁殖。这些因素共同促使沙丁鱼选择在这个时间段迁徙至德班附近海域。	b	tie	b	model_b	model_a	model_b
阿拉斯加州是美国面积最大的州,主要经济产业为渔业、矿业、林业。该地区自然景观独特,近年来,阿拉斯加州旅游业发展迅速。	分析美国阿拉斯加州主要经济产业的形成条件。	阿拉斯加州主要位于亚寒带针叶林地区，多山地，林木资源丰富；阿拉斯加海域冷海水与阿拉斯加暖流交汇，海水扰动，渔业资源丰富；该地区石油、天然气、煤、金等矿产资源丰富，矿业发达。	阿拉斯加州的主要经济产业形成条件是多方面的。首先，该地矿产原料丰富，为经济发展提供了重要支持。其次，阿拉斯加州三面环海，拥有丰富的渔业资源，为渔业发展提供了得天独厚的条件。此外，阿拉斯加州地势多山，森林资源丰富，为林业产业的发展提供了有力支持。这些条件共同促进了阿拉斯加州主要经济产业的形成和繁荣。	1. 阿拉斯加州的主要经济产业得以形成，首先是因为本地拥有丰富的原料，这些原料种类繁多，为产业发展提供了坚实基础。 2. 阿拉斯加受暖流影响，气候温暖湿润，水热条件较为充足，有利于农业和其他产业的发展。 3. 阿拉斯加的地形呈现东高西低的特点，海洋水汽充足，形成了丰富的地形雨，保障了水资源的充足。 4. 阿拉斯加位于洋流交汇处，适宜鱼类生存，渔业资源丰富，为渔业发展提供了得天独厚的条件。	a	stud_a	阿拉斯加州主要经济产业的形成条件主要可以归结为以下几个方面： 1. 地理位置：阿拉斯加位于北美洲的北端，拥有广阔的海岸线和丰富的自然资源。其独特的地理位置使得该地区成为渔业、矿业和林业等产业的理想之地。 2. 自然资源：阿拉斯加拥有丰富的自然资源，包括海洋生物、矿产和森林资源。例如，阿拉斯加的海域富含鲑鱼、虾等海洋生物资源，而其矿产资源则包括金、铜、铅、锌等多种金属矿产。 3. 气候条件：阿拉斯加的气候多样，包括温带、亚寒带和极地气候，这为林业提供了多样化的树木种类和生长条件。同时，海洋气候也为渔业提供了良好的条件。 4. 历史和文化因素：阿拉斯加的历史和文化背景也对其经济产业产生了影响。例如，原住民在这里的渔业和狩猎活动已经有数千年的历史，这为现代渔业产业的发展奠定了基础。 5. 政策支持：美国政府对阿拉斯加的经济发展给予了支持，包括对矿业和林业的开发提供了政策和财政上的激励措施。 6…	美国阿拉斯加州主要经济产业的形成条件与其独特的自然资源和地理位置密不可分。首先，阿拉斯加州拥有丰富的渔业资源，包括各类淡水和海水鱼类、贝类等，这使得渔业成为该州的重要经济支柱。其次，阿拉斯加州地下蕴藏着丰富的矿产资源，如石油、天然气、金矿等，这为矿业的发展提供了坚实基础。再者，阿拉斯加州拥有广袤的森林资源，林业也是该州的重要产业之一。 此外，阿拉斯加州地处北美大陆的西北部，地理位置独特，拥有众多壮丽的自然景观，如冰川、山脉、湖泊等，吸引了大量游客，促进了旅游业的快速发展。这些自然条件为阿拉斯加州的经济产业提供了良好的发展环境和市场机遇。 总的来说，阿拉斯加州主要经济产业的形成条件是其丰富的自然资源、独特的地理位置以及不断发展的旅游业，这些因素共同推动了该州经济的繁荣和多元化发展。 。	b	a	b	model_b	stud_a	model_b
阿拉斯加州是美国面积最大的州,主要经济产业为渔业、矿业、林业。该地区自然景观独特,近年来,阿拉斯加州旅游业发展迅速。	该地区景观独特，试指出每年前往阿拉斯加州旅游的黄金时段并说明原因。	时段为5-9月，理由是在这段时间内，气温较高，舒适宜人，白昼时间长，适合出行。	阿拉斯加州的夏季（6～9月）是前往该地旅游的黄金时段。这是因为夏季时，该地气候凉爽，适合户外活动和探索自然景观。此时，阿拉斯加州的植物生长茂盛，森林景观非常壮观，给游客带来美妙的观赏体验。因此，夏季是每年游客前往阿拉斯加州的最佳时机。	阿拉斯加州的旅游黄金时段是冬季，因为这个时候游客可以欣赏到当地独特的景观。阿拉斯加州位于北极圈内，游客可以常常看到迷人的极光。此外，由于该地地理位置纬度高，冬季时大雪纷飞，为游客带来了别具一格的体验。因此，每年冬季成为前往阿拉斯加州旅游的最佳时机。	a	stud_a	阿拉斯加州的自然景观确实独特，吸引了大量的游客前来探索。每年前往阿拉斯加州旅游的黄金时段主要集中在夏季，即6月至8月之间。以下是几个原因，解释了为什么这个时段被认为是旅游的黄金时期： 1. 天气条件：夏季的气候相对温和，日间温度通常在50°F至60°F（10°C至15°C）之间，这使得游客可以在户外活动而不必担心极端的寒冷。同时，夏季的白昼长达20小时左右，提供了充足的时间进行户外活动。 2. 野生动物观察：夏季是阿拉斯加州许多野生动物的繁殖季节，包括鲸鱼、鲸鲨、海豚、海豹、企鹅、海雕和各种鸟类。例如，鲸鱼季节通常在6月至9月，游客可以在当地的海岸线上观察到这些庞大的哺乳动物。 3. 冰川和冰川湖：夏季是冰川和冰川湖最容易接近的时期，因为它们在夏季开始融化，形成壮观的景观。例如，门斯克冰川和马克思冰川是游客们常去的景点。 4. 冰川登山和徒步：夏季的温度适宜，允许游客进行冰川登山和徒步旅…	每年前往阿拉斯加州旅游的黄金时段通常是夏季，特别是在6月至8月之间。这段时间是因为阿拉斯加州在夏季拥有漫长的白昼时间，让游客有更多的时间去探索该地区的自然景观和野生动物。此外，夏季也是观赏北极光的最佳时机，吸引了许多游客前往。另外，夏季气温相对较暖和，有利于户外活动，如徒步旅行、钓鱼等。因此，夏季是前往阿拉斯加州旅游的黄金时段。 。	a	tie	b	model_a	stud_a	model_b
粮食生产受农用化肥施用量、人口数量、地区经济发展水平、机械化水平、自然灾害、科技、惠农政策等诸多因素影响。长江经济带拥有良好的经济基础和农业生产条件,是我国传统的粮食主产区和商品粮基地。作为南方重要的粮食产区,长江经济带粮食产量虽然总体呈上升态势,但是在全国粮食产量中的份额却呈下降趋势,由1978年的49.4%下降至2018年的36.35%,农业产值在国民经济中的份额也由17%下降至6.7%。	有人认为长江经济带经济水平提高不利于粮食安全生产的发展。你是否赞同?表明你的观点并说明理由。(6分)	我是赞同的，理由是随着经济发展，工业化、城镇化快速推进，必定会挤占农业用地，导致粮食播种面积减少；工业化发展可能会加剧环境污染，影响粮食质量；经济发展促使农村剩余劳动力向城市转移，农村青壮年劳动力短缺，影响粮食生产。或不赞同，理由是经济发展有利于政府加大对农业的财政扶持力度，加强水利设施建设，提高农民种粮的积极性，改善农业生产条件和经营水平；经济发展有利于农民增加农业技术、生产资料等方面的投入，提高粮食单产和粮食质量；经济发展可以提高粮食加工企业经营水平，进一步带动粮食。	我赞同长江经济带经济水平提高可能对粮食安全生产不利的观点。南方粮食减产会增加水方的生产压力，北方土壤肥力下降需要加大保护，北方劳动力大量南下导致南方耕地减少，城市用地增加。这些因素都会对粮食安全生产造成负面影响。	我赞同这一观点。长江经济带经济水平提高，可能会导致抢占农业用地，从而减少粮食产量。此外，随着经济水平提高，从事农业生产的人口可能会减少，导致耕地减少，进而不利于保障粮食生产的安全。因此，长江经济带经济水平提高对粮食安全生产的发展可能会产生负面影响。	b	stud_b	我不完全赞同这个观点。长江经济带经济水平的提高确实带来了许多积极的影响，但同时也存在一些潜在的挑战。以下是我的理由： 首先，经济水平的提高通常意味着技术进步和机械化程度的提高，这些都有利于提高粮食生产效率和产量。例如，通过使用高效的农业机械和先进的灌溉系统，可以大幅度提高作物的产量和质量。 其次，经济发展可以带来更多的资金投入到农业领域，包括购买高品质的种子、化肥和农药，以及改善土壤条件等，这些都有助于提高粮食产量。 然而，经济发展也可能带来一些负面影响。例如，随着农民的收入水平提高，他们可能会转向非农产业工作，减少对农业的投入，这可能导致粮食产量下降。另外，经济发展可能导致土地资源的过度开发和环境污染，这些都可能对粮食安全产生负面影响。 此外，长江经济带作为南方重要的粮食产区，其粮食产量虽然总体呈上升态势，但在全国粮食产量中的份额却呈下降趋势。这可能是由于其他地区的粮食产量增长速度更快…	我不完全赞同长江经济带经济水平提高不利于粮食安全生产的发展这一观点。首先，经济水平的提高可以带动农业现代化和机械化水平的提升，提高农业生产效率，从而增加粮食产量。其次，经济水平的提高可以吸引更多科技和资金投入到农业领域，推动农业科技创新，提高粮食生产的质量和效益。此外，经济水平的提高也有利于改善农民生活水平，减少农民转产转行的情况，保障粮食生产的可持续性。 当然，经济水平提高也可能带来一些负面影响，比如土地资源开发过度、环境污染等问题，这些都需要政府和社会各界共同努力来解决。但总的来说，长江经济带经济水平提高对粮食安全生产的发展是有积极作用的。	tie	a	a	model_a	stud_a	stud_a
阅读图文资料,完成下列要求。云贵高原喀斯特地貌广布,流水的冲刷使地表土层浅薄,地表水渗漏严重,不利于耕作,只有那些被当地人称为“坝子”的山间小盆地内有些小块的冲积平原,水土条件相对较好,是发展农业的好地方,故称为坝子农业。曾经的坝子以种水稻为主,而现今,许多坝子多采用“油菜+ X”轮作方式发展农业,即在种完冬油菜之后的土地上,接着种植水稻,或玉米,烟叶(香烟原料),蔬菜等农作物。	分析云贵高原发展坝子农业的有利自然条件。	纬度低，热量充足，山间小盆地内的小块冲积平原地形平坦，适宜耕种；坝子地势较低，有河流提供灌溉水源，土壤肥沃，土层较厚。	云贵高原发展坝子农业具有以下有利自然条件：水资源充足，适合农作物生长；气温偏高，有利于水稻等喜热的农作物生长；坝子的土壤较肥沃，适宜农作物生长套种；地势较平坦，适合耕作。	1. 降水量丰富，水资源充足，有利于发展坝子农业。 2. 种植面积广阔，地理位置优越。 3. 水热条件相对较好。	a	stud_a	云贵高原的喀斯特地貌特征是其地表土层浅薄和水土流失严重，这在一定程度上限制了该地区的农业发展。然而，存在一些被当地人称为“坝子”的山间小盆地，这些区域内有冲积平原，水土条件相对较好，适合发展农业。以下是云贵高原发展坝子农业的有利自然条件： 1. 地形条件：坝子地形通常位于山谷盆地内，地势较低，水文条件较好，能够有效地收集和储存雨水和山洪水，为农业灌溉提供了自然的水源。 2. 土壤条件：尽管云贵高原的土层整体较浅，但坝子地区的冲积平原土壤深度相对较好，含有丰富的有机质，有利于农作物的生长。 3. 气候条件：云贵高原的气候特点是季风气候，具有明显的季节变化，夏季降水充足，冬季干燥，适合种植水稻等水稻类作物。 4. 多样化作物选择：由于坝子地区的水土条件相对较好，可以种植多种作物，包括水稻、玉米、烟叶、蔬菜等，提供了多样化的农产品选择。 5. 土地利用效率：通过“油菜+X”轮作方式，能够有效地…	云贵高原发展坝子农业的有利自然条件包括以下几个方面： 1. 喀斯特地貌广布：喀斯特地貌的特点是地表土层浅薄，这使得地下水较容易渗漏，有利于农作物的根系生长和排水，避免了水涝问题。 2. 小盆地内的冲积平原：坝子农业主要发展在山间小盆地内的小块冲积平原上，这些地方水土条件相对较好，适合农作物的种植。 3. 轮作种植方式：采用“油菜+ X”轮作方式可以有效利用土地资源，提高土壤的肥力和保持土壤的水分，有利于提高农作物产量。 4. 多样化的农作物：现在许多坝子农业采用多样化的农作物种植方式，如水稻、玉米、烟叶、蔬菜等，这样可以增加农民的收入来源，降低经济风险。	a	a	a	model_a	stud_a	stud_a
阅读图文资料,完成下列要求。云贵高原喀斯特地貌广布,流水的冲刷使地表土层浅薄,地表水渗漏严重,不利于耕作,只有那些被当地人称为“坝子”的山间小盆地内有些小块的冲积平原,水土条件相对较好,是发展农业的好地方,故称为坝子农业。曾经的坝子以种水稻为主,而现今,许多坝子多采用“油菜+ X”轮作方式发展农业,即在种完冬油菜之后的土地上,接着种植水稻,或玉米,烟叶(香烟原料),蔬菜等农作物。	请从社会经济方面分析曾经的坝子以种水稻为主的原因。	水稻种植历史悠久且传统经验丰富，其单位面积产量高，种植水稻能有效缓解人口对土地的压力和对粮食的需求，加之人口较为稠密且劳动力充足，人们普遍喜食米饭。	①云贵高原的经济发展水平较为落后，种植水稻成本不高；②有大量廉价劳动力供应水稻种植需求③云贵高原降水充足，有利于水稻的生长	曾经的坝子以种水稻为主的原因主要有四点：首先，坝子地势多，种水稻的产量较高，而且水稻是人们生活中必不可少的主要粮食之一，市场需求量大，可以大量出售。其次，人们自身也主要以水稻为主食，种植水稻可以节约生活成本。第三，政策方面也鼓励人们种植水稻，并提供政策优惠。最后，国家有悠久的种水稻历史，技术更为先进，种植水稻的产量也更好，这也是促使坝子以种水稻为主的重要原因之一。	b	stud_b	曾经的坝子以种水稻为主的原因主要是基于当时的社会经济条件和地理环境特点。以下是几个关键因素： 1. 水资源：水稻作为水生作物，对水资源的需求非常高。云贵高原喀斯特地貌的特点是地表水渗漏严重，地表土层浅薄，这意味着水资源在表土层内的积聚和循环相对集中。这种地理条件非常适合水稻的生长，因为水稻需要大量的水分来进行生长和产量的提升。 2. 气候条件：云贵高原的气候特点是季风气候，夏季降水充沛，气温适宜，这为水稻的生长提供了良好的条件。水稻作为热带作物，需要较高的温度和充足的水分来进行生长。 3. 土地资源：虽然地表土层浅薄，但在山间小盆地内的冲积平原由于地形的特殊性，能够积聚较为丰富的土壤资源，这些土壤条件适合种植水稻。 4. 经济需求：水稻是粮食作物，能够满足当地居民的基本粮食需求。同时，水稻在当地市场上具有较高的需求和价值，能够为当地居民提供稳定的经济收入。 5. 技术和管理：在当时，种植…	曾经的坝子以种水稻为主的原因可以从社会经济方面进行分析。首先，水稻是当地人民的主食之一，因此种植水稻可以保障当地人民的生活需求，确保粮食安全。其次，水稻是一种比较耐寒的作物，适应云贵高原的气候条件，相对容易种植和管理，便于当地农民进行种植。此外，水稻在当地有一定的市场需求，有稳定的销路，有利于当地农民增加收入，提高经济水平。因此，曾经的坝子以种水稻为主是基于当地的气候条件、食品需求和经济发展的考虑。 .	b	b	b	model_b	model_a	model_b
阅读图文资料,完成下列要求。云贵高原喀斯特地貌广布,流水的冲刷使地表土层浅薄,地表水渗漏严重,不利于耕作,只有那些被当地人称为“坝子”的山间小盆地内有些小块的冲积平原,水土条件相对较好,是发展农业的好地方,故称为坝子农业。曾经的坝子以种水稻为主,而现今,许多坝子多采用“油菜+ X”轮作方式发展农业,即在种完冬油菜之后的土地上,接着种植水稻,或玉米,烟叶(香烟原料),蔬菜等农作物。	分析许多坝子采用“油菜+X”轮作方式发展农业的原因。	坝子的自然条件尤其是气候条件适合种植油菜，种植油菜不仅可以增加经济收入，还可以通过与其他农作物轮作的方式提高土地利用效率，有利于调节土壤肥力，减轻病虫害，并能更好地适应市场需求的变化。	许多坝子采用“油菜+X”轮作方式发展农业的原因是多方面的。首先，这种轮作方式能够提高土地利用率，合理规划耕地，充分发挥土地资源的潜力。其次，轮作能够提高农作物的产量，进一步促进经济发展，提升农民的收入水平。另外，由于云贵高原喀斯特地貌广布，耕地紧张的情况较为严重，采用轮作可以缓解这一问题，有效利用有限的耕地资源，实现农业可持续发展。	许多坝子采用“油菜+X”轮作方式发展农业的原因是多方面的。首先，油菜作为主要作物是因为当地气候适宜合种植油菜，而且当地可利用油菜花作为一大特色，吸引外来人员旅行观赏，促进当地经济发展。其次，油菜主要是秋种冬季开花，不会与大部分农作物的生长时间相重合，可以提高土地利用率，从而增加经济收入。此外，种植更多种类的作物能更好地满足人们的需求，增加农业的多样性和稳定性。	a	stud_a	许多坝子采用“油菜+X”轮作方式发展农业的原因主要有以下几点： 1. 土地利用效率：油菜是一种快速生长的作物，能够在短时间内迅速覆盖土地，减少土壤侵蚀和水分蒸发，同时提供经济效益。随后种植的作物（如水稻、玉米、烟叶、蔬菜等）可以利用油菜留下的肥力和改善的土壤结构，提高第二季作物的产量。 2. 水分管理：油菜对水分的要求相对较低，可以在旱季种植，减少对地下水资源的依赖。随后种植的作物可以利用雨季的充足水分，减少灌溉需求，提高水资源的利用效率。 3. 病虫害管理：油菜和其他作物之间的轮作可以有效减少病虫害的发生。油菜的生长周期和其他作物不同，能够打破病虫害的生命周期，减少对农药的依赖，实现更为可持续的农业生产。 4. 经济效益：油菜和其他作物的市场需求稳定，能够为农民提供稳定的收入来源。通过轮作，可以实现作物多样化，降低市场风险，提高农业的经济效益。 5. 土地恢复：油菜的生长周期较短，能够…	许多坝子采用“油菜+X”轮作方式发展农业的原因有以下几点： 1. 多样化种植：通过“油菜+X”轮作方式，可以使农作物的种植多样化，降低单一作物连作连种的风险，减少土壤疾病的传播，提高土壤的养分利用率，有利于土地的长期保育。 2. 有效利用土地资源：通过轮作方式，可以更好地利用有限的土地资源，提高土地的利用效率，增加农田的产出，提高农民的收入。 3. 适应气候条件：油菜和其他作物各有其适应的生长季节和气候条件，通过轮作方式，可以更好地利用气候条件，减少因气候变化而导致的农作物减产的风险。 4. 增加经济效益：油菜和其他作物的价格波动较大，通过轮作方式，可以分散农民的风险，降低经济风险，增加经济效益。 因此，许多坝子采用“油菜+X”轮作方式发展农业是为了提高土地利用效率，增加农田产出，降低农业风险，增加经济效益。 。	a	b	b	model_a	model_a	model_b
2013年,国家提出长江经济带发展战略,将长江经济带作为我国经济社会发展和转型的重要支撑。长江经济带的发展规划明确提出,要形成“一轴、两翼、三级、多点”的空间规划。长江经济带自然条件优越,社会经济基础雄厚。但长江经济带也存在湿地面积缩减、森林覆盖率下降、生物多样性减少,局部污染严重;区域与部门的管理机制及方式单一,条块分割和交叉较严重,联系薄弱,协调机制有限;机场、港口、铁路和能源管线等重要基础设施规划布局不尽合理;产业趋同、转型升级动力不足,中心城市的辐射带动能力不足,中小城市产业发展特色不明显等现象。	说出长江经济带发展经济的优势条件。	地理位置优越，交通便利，资源储量大，种类丰富，工农业基础雄厚，产业优势明显，人才荟萃，科教事业发达，技术与管理先进，人口密集，城市集中，市场广阔。	长江经济带具有以下优势条件：横跨东西，促进区域协调发展；长三角经济群，促进创新，提高企业竞争力；海、江、河水运条件便利，提高工作效率；矿产资源丰富，科教人才提升资源利用。	长江经济带拥有多个城市，交通便利，人口众多。开放程度高，外贸发展较为适宜。该地区拥有丰富的能源和矿产资源，待开发潜力巨大。部分地区尚未充分发展，但发展潜力巨大，前景十分光明。大部分地区基础设施完善。	a	stud_a	长江经济带发展经济的优势条件主要包括以下几点： 1. 长江水系：长江是中国最长的河流，拥有丰富的水资源和良好的航运条件，为长江经济带的发展提供了重要的自然优势。长江流域涵盖了多个省份，形成了广泛的水路交通网络，有助于促进区域内的物流和贸易。 2. 地理位置优越：长江经济带横跨中国的东部和中部，连接了中国的经济中心上海和经济发展较快的中西部地区。这种地理位置使得长江经济带成为连接东部沿海经济发达地区与中西部经济相对落后的地区的桥梁。 3. 人口资源丰富：长江流域是中国人口最多的地区之一，拥有庞大的劳动力资源和消费市场。同时，长江流域还拥有众多高等教育机构和科研机构，为长江经济带的创新和发展提供了强大的知识和技术支持。 4. 社会经济基础雄厚：长江经济带拥有众多的工业基地和经济中心城市，如武汉、重庆、南京等，这些城市的工业基础和经济实力为长江经济带的发展提供了坚实的基础。 5. 政策支持：国…	长江经济带的发展经济的优势条件包括自然条件优越，如水资源丰富、气候适宜，这为农业、水利、能源等产业的发展提供了有力支撑；同时，长江经济带拥有雄厚的社会经济基础，包括发达的交通网络、完善的市场体系、较高的人口密度和丰富的人力资源，这为各种产业的发展提供了便利条件。此外，长江经济带位于我国经济发展的重要区域，与全国各地区的联系紧密，有利于资源要素的优化配置和产业协同发展。总体来说，长江经济带在发展经济方面具有得天独厚的优势条件。 。	a	a	a	model_a	stud_a	stud_a
2013年,国家提出长江经济带发展战略,将长江经济带作为我国经济社会发展和转型的重要支撑。长江经济带的发展规划明确提出,要形成“一轴、两翼、三级、多点”的空间规划。长江经济带自然条件优越,社会经济基础雄厚。但长江经济带也存在湿地面积缩减、森林覆盖率下降、生物多样性减少,局部污染严重;区域与部门的管理机制及方式单一,条块分割和交叉较严重,联系薄弱,协调机制有限;机场、港口、铁路和能源管线等重要基础设施规划布局不尽合理;产业趋同、转型升级动力不足,中心城市的辐射带动能力不足,中小城市产业发展特色不明显等现象。	指出长江经济带发展面临的主要问题。	生态环境压力大，环境污染严重，上、中、下游之间经济联系薄弱，协调体制机制滞后，沿江交通基础设施不完善，联通不够，产业同质化，转型升级动力不足，能源资源不足。	长江经济带发展面临的主要问题包括局部污染严重，湿地森林面积逐渐减少，各地联系薄弱，城市之间经济水平差异大，大城市带动中小城市发展效果不明显，交通设施布局不合理，产业趋同、转型升级动力不足，以及创新不足。	长江经济带发展面临的主要问题包括土地面积缩减导致局部污染严重、区域管理机制及方式单一、交通等重要基础设施布局不合理。	a	stud_a	长江经济带发展面临的主要问题包括： 1. 环境问题：湿地面积缩减、森林覆盖率下降、生物多样性减少，局部污染严重。这些问题不仅影响生态平衡，也对人类健康和经济发展产生负面影响。 2. 管理机制问题：区域与部门的管理机制及方式单一，导致条块分割和交叉较严重，联系薄弱，协调机制有限。这种管理方式限制了资源的高效利用和区域协作。 3. 基础设施问题：机场、港口、铁路和能源管线等重要基础设施规划布局不尽合理。这可能导致运输效率低下，增加成本，限制区域发展。 4. 产业问题：产业趋同、转型升级动力不足。长江经济带的产业结构可能过于单一，缺乏创新和多样化，这限制了产业的持续发展和升级。 5. 城市发展问题：中心城市的辐射带动能力不足，中小城市产业发展特色不明显。这种现象可能导致区域发展不平衡，中心城市过度发展，中小城市资源配置不均。	长江经济带在发展过程中面临着诸多问题，主要包括： 1. 环境问题：湿地面积缩减、森林覆盖率下降、生物多样性减少等环境问题严重影响了生态平衡和可持续发展。 2. 污染问题：局部污染严重，影响了周边地区的居民健康和生活环境。 3. 管理机制问题：区域与部门管理机制单一，条块分割和交叉严重，联系薄弱，协调机制不够完善。 4. 基础设施问题：重要基础设施规划布局不合理，影响了区域发展的整体效率和效益。 5. 产业结构问题：产业趋同、转型升级动力不足，中心城市的辐射带动能力不足，中小城市产业发展特色不明显，导致了经济增长动力不足。 .	a	a	a	model_a	stud_a	stud_a
2013年,国家提出长江经济带发展战略,将长江经济带作为我国经济社会发展和转型的重要支撑。长江经济带的发展规划明确提出,要形成“一轴、两翼、三级、多点”的空间规划。长江经济带自然条件优越,社会经济基础雄厚。但长江经济带也存在湿地面积缩减、森林覆盖率下降、生物多样性减少,局部污染严重;区域与部门的管理机制及方式单一,条块分割和交叉较严重,联系薄弱,协调机制有限;机场、港口、铁路和能源管线等重要基础设施规划布局不尽合理;产业趋同、转型升级动力不足,中心城市的辐射带动能力不足,中小城市产业发展特色不明显等现象。	简述实现长江经济带发展目标的主要措施。	应大力保护长江生态环境，加快构建综合立体交通走廊，创新驱动产业转型升级，积极推进新型城镇化，努力构建全方位开放新格局，创新区域协调发展体制机制。	为实现长江经济带发展目标，主要措施包括丰富区域管理机制、合理分布基础设施布局、保护生态环境，减少污染以及产业机构向内陆转移，带动内陆经济发展。	为实现长江经济带发展目标，我们需要采取一系列主要措施。首先，要注重生态环境的保护，制定相应的生态保护政策。其次，加强区域与部门之间的管理，创新管理机制。第三，要大力发展科技，进一步落实基础设施的完善。最后，发挥中心城市的辐射带动作用，促进产业多样化，帮助企业转型升级，完善产业链。这些措施将有助于推动长江经济带持续健康发展。	b	stud_b	为了实现长江经济带发展目标，政府和相关部门采取了一系列措施，旨在解决上述问题并促进区域均衡发展。主要措施包括： 1. **生态环境保护和修复**：加强湿地保护，恢复森林覆盖，保护生物多样性，减少污染，提升生态环境质量。例如，通过实施退耕还林、湿地保护等项目，恢复和保护自然生态系统。 2. **优化管理机制**：建立更加完善的区域管理体系，强化区域协调发展，推动部门间和区域间的合作，形成更加有效的协调机制。例如，建立长江经济带区域协调发展联盟，促进区域内资源共享和协同发展。 3. **基础设施优化**：优化机场、港口、铁路和能源管线等基础设施的规划布局，提高运输效率和服务能力。例如，推动长江流域的高速铁路建设，提升区域内的交通网络连接性。 4. **产业结构调整和升级**：鼓励产业多元化，推动产业转型升级，增强产业链的创新能力和竞争力。例如，发展现代农业、智能制造、绿色能源等新兴产业，提升…	为实现长江经济带发展目标，我们可以采取以下主要措施： 1. 加强生态保护和修复，保障湿地、森林等自然资源的可持续利用，提高生物多样性。 2. 完善区域间的管理机制和协调机制，加强区域内各部门之间的合作与协调，实现资源共享和优势互补。 3. 优化基础设施规划布局，提高交通、能源等基础设施的建设水平和效率，推动区域间的互联互通。 4. 推动产业结构调整和转型升级，加大对中心城市和中小城市产业发展的支持力度，促进产业多元化发展。 5. 加强政策引导和资金支持，鼓励企业加大科技创新投入，提高技术含量和产品质量，推动长江经济带向高质量发展转变。 举例来说，比如可以加大对长江经济带的生态环境保护投入，通过开展湿地保护与恢复工程、推广绿色生产方式等措施，提高生态环境质量；同时，可以加强区域间的合作，推动一体化发展，打破条块分割，形成区域协同发展的局面。 。	tie	b	b	model_a	model_a	model_b
气候的大陆性是相对于海洋性而言的,大陆性气候是受大陆热力性质变化大、水分少的性质影响的气候,在我国主要表现为最热月与最冷月紧跟在夏至与冬至之后出现,春温高于秋温，降水集中在夏半年，气温年、月平均日较差>10℃等。	简述长江流域主要为海洋性过渡气候的形成原因。	长江流域冬季受来自西伯利亚的寒冷北风影响，加上流域内的丘陵地形和高原比重大，加重了冬季的寒冷；夏季，受副高控制，加上此季节太阳辐射强，使得夏季炎热；冬季的寒冷和夏季的炎热构成强烈对比，气温年、月平均日较差均较大，因此形成海洋性过渡气候。	长江流域主要为海洋性过渡气候的形成原因有以下几点：首先，纬度较低的东部受东南季风影响，西部受西南季风影响，水分性质影响较大；其次，北部有高大山脉或高原阻挡西北季风，导致气温年、月平均日差较小；再者，三面环海，地势平坦，有利于海洋上温暖湿润的水汽深入内陆；最后，纬度较低使得太阳幅射量和昼夜长短差距小，平均日较差也较小。	长江流域主要为海洋性过渡气候的形成原因是因为地形以山地、高原为主，海拔高，温度低，空气稀薄，太阳辐射大。由于坡度较高，受太阳辐射时间较少，气温也较低。	tie	stud_a	长江流域主要表现为海洋性过渡气候的形成原因主要包括以下几点： 1. 地理位置：长江流域位于中国东部，靠近太平洋和黄海，受海洋性气候的影响较大。海洋的温度相对稳定，能够在一定程度上调节陆地气候的季节性变化。 2. 海洋热量的影响：长江流域靠近海洋，海洋在冬季能够提供较多的热量，减少了陆地的冷空气影响，使得冬季气温相对较高。同样，在夏季，海洋的冷空气也能有效地降低陆地的高温，减少了夏季的极端高温天气。 3. 地形因素：长江流域地形较为复杂，拥有多个山脉和平原，这些地形特征能够影响空气流动和气候条件。山脉的存在能够阻挡或分散来自不同方向的气流，导致气候条件的局部差异。 4. 气候系统的交互作用：长江流域处于亚热带地区，受亚热带气候系统的影响，气候具有季节性的温差较小，四季分明，但温差不大。同时，长江流域的气候也受到来自北方的冷空气和来自南方的温暖湿润空气的交互作用，这种交互作用有助于形成较为温…	长江流域主要为海洋性过渡气候的形成原因是由于长江流域地处中国大陆中部，受到大陆性气候和海洋性气候的共同影响。长江流域地势起伏较大，东部靠近海洋，西部则是高原地带，这种地理特点导致了长江流域气候的复杂性。受太平洋季风的影响，长江流域夏季多雨，冬季干燥，昼夜温差大，气温较为稳定。此外，长江流域的气候还受到青藏高原的影响，青藏高原上的冷空气会影响长江流域的气温和降水情况。因此，长江流域的海洋性气候过渡性明显，表现为夏季多雨、冬季干燥，温差较大，昼夜温差较小等特点。 。	b	tie	b	model_b	stud_a	model_b
气候的大陆性是相对于海洋性而言的,大陆性气候是受大陆热力性质变化大、水分少的性质影响的气候,在我国主要表现为最热月与最冷月紧跟在夏至与冬至之后出现,春温高于秋温，降水集中在夏半年，气温年、月平均日较差>10℃等。	从降水方面分析雅鲁藏布江谷地为海洋性过渡气候的原因。	雅鲁藏布江谷地开口朝南，夏季受西南季风和地形的影响，在迎风坡形成丰富降水。	雅鲁藏布江谷地开口朝南，夏季受到来自印度洋的西南季风影响。季风带来的水汽在迎风坡凝结，形成丰富的降水。尽管降水集中在夏半年，但相较于典型大陆性气候，雅鲁藏布江谷地的降水更加稳定且充足，因此表现出海洋性过渡气候的特征。	从降水的角度来看，雅鲁藏布江谷地的降水主要集中在夏半年。这种降水分布方式与典型的海洋性气候有所不同，但相比典型的大陆性气候，雅鲁藏布江谷地的降水更加稳定和充沛。因此，这种降水特点使得该地区表现出海洋性过渡气候的特征。	a	stud_a	从降水方面分析，雅鲁藏布江谷地为海洋性过渡气候的原因主要体现在以下几个方面： 1. 地理位置：雅鲁藏布江谷地位于喜马拉雅山脉的东部，地处亚热带地区。虽然它距离印度洋相对较远，但由于喜马拉雅山脉的阻挡作用，导致其受海洋性气候的影响较小。 2. 季风影响：雅鲁藏布江谷地受季风的影响较大，夏季时受南亚季风的影响，带来丰富的湿气和降水；冬季则是北亚季风的影响，虽然降水量减少，但仍然有较为稳定的降水模式。 3. 地形因素：喜马拉雅山脉的高山阻挡了来自印度洋的湿气，导致雅鲁藏布江谷地的降水量不如海洋性气候区域那样均匀和丰富。然而，由于地形的原因，雅鲁藏布江谷地的降水仍然集中在夏季，这与海洋性气候的特点相似。 4. 温度差异：雅鲁藏布江谷地的气温年、月平均日较差虽然不如典型的大陆性气候，但仍然较大，这也与海洋性过渡气候的特点相符合。 综上所述，雅鲁藏布江谷地的降水模式虽然不完全符合海洋性气候，但其季风…	雅鲁藏布江谷地为海洋性过渡气候的原因可能是由于其地理位置靠近印度洋的影响。印度洋上的暖湿气流会带来较多的水汽，因此在雅鲁藏布江谷地降水量相对较大，表现出一定的海洋性气候特征。此外，雅鲁藏布江谷地地势较低，有利于水汽的聚集和降水，也是导致该地区具有海洋性过渡气候的原因之一。 举例来说，雅鲁藏布江谷地位于喜马拉雅山脉南麓，山脉的阻挡作用会造成湿润的气流在此地区聚集并下降，导致降水量相对较大。同时，喜马拉雅山脉又是印度洋季风的屏障，使得该地区在夏季受到暖湿气流的影响，进一步加大了降水量。 。	a	a	a	model_a	stud_a	stud_a
2018年6月4日,历时570天,距离墨尔本以西仅65千米的亚洛克风电场全部12台风机正式投产发电。澳大利亚亚洛克风电场是我国国家电力投资集团并购太平洋水电公司后在境外开发的首个绿地项目，标志着国家电投品牌正式进入澳大利亚能源市场，参与国际能源舞台的群雄逐鹿。下图为澳大利亚亚洛克风电场位置及澳大利亚多年平均日照时数分布	简述澳大利亚亚洛克风力资源开发的优势。	冬季受西风控制，风力资源丰富；位于山口附近，“狭管效应”明显，风力大；距首都等城市近，输电成本低；东部沿海城市较多，能源市场需求量大。	澳大利亚亚洛克风力资源开发具有以下优势：位于澳大利亚大都市墨尔本和堪培拉附近，市场需求量大；地处多迎风坡，风力稳定且丰富。	澳大利亚亚洛克风力资源开发具有以下优势：首先，地处山地，海拔高，风力充足，非常适合风力发电；其次，距离墨尔本、堪培拉等城市较近，便于电力运输，市场潜力广阔；最后，风力发电是可再生能源，污染较少，并且受到澳大利亚政府政策支持。	b	stud_b	澳大利亚亚洛克风力资源开发的优势主要体现在以下几个方面： 1. 丰富的风力资源：澳大利亚位于南半球，拥有强烈的季风气候，特别是在西部地区，风力资源非常丰富。亚洛克风电场所在的地区，年平均风速高，风力资源的利用效率很高。 2. 稳定和可靠的风力：澳大利亚的风力资源具有较高的稳定性和可靠性，这对于风力发电站来说是非常重要的。稳定的风力可以保证发电的连续性和可预测性。 3. 政策支持：澳大利亚政府对可再生能源，特别是风力发电给予了较多的政策支持和激励措施，包括税收优惠、购电补贴等，这有助于降低风力发电项目的投资成本。 4. 国际合作：亚洛克风电场的开发标志着中国国家电力投资集团（国家电投）品牌的进入澳大利亚能源市场，这种国际合作不仅促进了双方的经济利益，也为澳大利亚的能源结构升级提供了新的途径。 5. 环境友好：风力发电是一种清洁的能源，它不产生二氧化碳和其他温室气体，对环境影响小。澳大利亚作…	澳大利亚亚洛克风力资源开发的优势主要体现在以下几个方面： 1. 地理位置优越：亚洛克风电场距离墨尔本以西仅65千米，便于电力输送和供应。同时，澳大利亚拥有丰富的风力资源，适合风力发电。 2. 可再生能源政策支持：澳大利亚政府对可再生能源发展给予了积极支持，提供了丰富的政策和财政激励，使得亚洛克风电场等项目更具竞争力。 3. 国家电力投资集团的技术优势：作为我国国家电力投资集团的首个绿地项目，亚洛克风电场能够充分借鉴国内的技术经验和先进技术，确保项目的高效运行。 4. 参与国际能源市场：亚洛克风电场的投产标志着国家电投品牌正式进入澳大利亚能源市场，有望在国际能源舞台上发挥更大的作用。 。	b	a	a	model_b	stud_a	stud_a
2018年6月4日,历时570天,距离墨尔本以西仅65千米的亚洛克风电场全部12台风机正式投产发电。澳大利亚亚洛克风电场是我国国家电力投资集团并购太平洋水电公司后在境外开发的首个绿地项目，标志着国家电投品牌正式进入澳大利亚能源市场，参与国际能源舞台的群雄逐鹿。下图为澳大利亚亚洛克风电场位置及澳大利亚多年平均日照时数分布	说明澳大利亚建设风电场的意义。	风力是一种可再生能源和清洁能源，可以减轻澳大利亚大气污染，优化能源消费结构；风力发电能带动发电及相关产业的发展，将资源优势转化为经济优势；完善当地基础设施，增加就业机会，取得良好的社会效益。	建设风电场在澳大利亚具有重要意义。首先，使用可再生能源有助于保护环境，减少对传统能源的依赖。其次，风电场的建设为当地社区提供了大量就业岗位，缓解了就业压力。此外，增加风电能源的比重也有利于提高能源多样性，增强能源安全性。最后，风电场的发展也推动了相关产业和技术的进步，优化了产业结构，促进了经济的可持续发展。	建设风电场在澳大利亚具有重要意义，首先可以减少火力发电对环境造成的污染，推动可持续发展。其次，引入风电场能够增加发电方式的多样性，减少对火力发电的依赖，从而减少煤炭的使用，将更多资源投入生产或出口。此外，风电场的建设也可以减少城市大气污染，为城市打造绿色旅游生态城市提供了重要支持，同时促进旅游业的发展，推动生产结构升级和本地经济的发展。	a	stud_a	澳大利亚建设风电场的意义在于实现可持续的能源生产和减少对化石燃料的依赖。风能作为一种清洁能源，不会产生二氧化碳和其他温室气体的排放，对于减缓全球气候变化具有重要作用。澳大利亚拥有丰富的风资源，特别是在其广阔的内陆地区，因此建设风电场可以有效利用这些资源。 此外，风电场的建设和运营可以创造就业机会，促进地方经济的发展。例如，亚洛克风电场的建设和维护需要专业技术人员和工人，这些都为当地社区带来了经济利益。 澳大利亚的风电场还可以提高能源的自给率，减少对进口能源的依赖，增强国家能源安全。通过投资于风能和其他可再生能源，澳大利亚可以减少对国际市场的依赖，降低能源成本，并在全球能源转型中扮演积极角色。 最后，澳大利亚的风电场项目，如亚洛克风电场，也体现了国家电力投资集团（国家电投）在国际市场上的战略扩张和品牌影响力。通过在海外开发绿色能源项目，国家电投不仅推动了可持续发展，也展示了中国企业在国际能…	澳大利亚建设风电场的意义在于推动可再生能源的发展，减少对传统能源的依赖，减少温室气体排放，保护环境。风电场可以有效利用风能，转化为电能，为当地和国家提供清洁能源，促进经济发展，同时也提高能源安全性。此外，建设风电场也有助于吸引外资投入，促进经济多元化发展。总的来说，澳大利亚建设风电场是一个可持续发展的举措，有助于实现环境保护和经济发展的双重目标。	a	a	a	model_a	stud_a	stud_a
我国人口数量庞大，受不同因素的影响，人口分布差异显著。	描述我国人口分布的主要特点。	人口分布不均匀；黑河—腾冲一线东部人口稠密，西部人口相对稀疏。	我国人口分布的主要特点包括人口不均衡以及腾冲线以南的东部沿海地区人口稠密，而腾冲线以北的西北地区人口稀少。	我国人口分布的主要特点包括人口分布不均，主要集中在西南部，南部人口密集，北部人口稀疏。大部分人口主要分布在平原和丘陵地区。	a	stud_a	我国的人口分布主要特点包括： 1. 人口密度差异显著：中国的北方地区人口密度普遍高于南方地区。例如，北京和天津等北方大城市的人口密度远高于西藏、青海等西部边疆地区。 2. 地域差异：人口分布在不同的地理区域有所差异。东部沿海地区的人口密度较高，尤其是大城市如上海、广州等，而西部地区则人口较少，尤其是西藏、宁夏等自治区。 3. 城乡差异：城镇化水平的提高导致城乡人口分布差异加剧。城市人口增长迅速，而农村人口则相对减少。城市人口集中在一小部分大城市，形成了多个世界级的大都市圈。 4. 经济发展水平差异：人口分布也与经济发展水平有关。经济发达地区的人口密度通常较高，如珠三角、长三角等经济发达地区，而经济相对落后的地区人口较少。 5. 政策影响：政府的计划生育政策和人口迁移政策也对人口分布产生了影响。例如，计划生育政策导致人口增长放缓，而人口迁移政策则促进了人口从农村地区向城市地区的流动。	我国人口分布的主要特点包括以下几个方面： 1. 东部沿海地区人口密集：东部沿海地区是我国经济发达的地区，人口相对密集。例如，广东、江苏、浙江、山东等省份人口数量较多。 2. 中西部地区人口稀疏：相比于东部沿海地区，中西部地区地广人稀，人口密度较低。例如，青海、西藏、内蒙古等省份人口相对较少。 3. 城乡差异明显：城市人口密集，农村人口较少。随着城市化进程的加快，越来越多的人口涌入城市，导致城市人口规模不断增加。 4. 人口老龄化趋势明显：随着生育率下降和人口寿命延长，我国人口老龄化问题日益突出，东部地区的老龄人口比例较高。 5. 人口流动性增强：随着经济发展和城市化进程，人口流动性增强，东部地区吸引了大量外来人口，形成了一定规模的外来人口社区。 .	tie	a	a	model_b	stud_a	stud_a
新疆维吾尔自治区位于我国西北边陲，远离海洋，深居内陆，昼夜温差大，日照时间充足（年日照时间达 2 500～3500小时），降水量少，气候干燥。新疆是全国五大牧区之一,在“三山”和“两盆”周围有大量的优良牧场,牧草地总面积7.7亿亩,仅次于内蒙古,西藏,居全国第三。新疆矿产种类全、储量大，开发前景广阔。面积约占全国国土面积的 1/6，常住人口约为两千多万人，人口密度约为全国的1/10.	简述影响新疆人口容量的因素。	资源数量尤其是水资源不足；社会经济和科技发展水平；人均消费水平以及对外开放程度等。	影响新疆人口容量的因素有利有弊。一方面，新疆拥有广阔的耕地面积和丰富的矿产资源，这为人口提供了发展空间和就业机会。另一方面，新疆经济相对落后，气候恶劣，水资源缺乏，这些因素可能限制了人口的增长和发展。	影响新疆人口容量的因素包括缺少水资源、气候干燥、降水量少以及远离海洋。	b	stud_b	影响新疆人口容量的因素主要包括以下几点： 1. 地理环境：新疆位于中国西北部，深居内陆，远离海洋，昼夜温差大，气候干燥，降水量少，这些自然条件限制了农业生产和人口的集中。例如，新疆的降水量普遍低于全国平均水平，导致水资源相对紧张。 2. 经济发展水平：新疆的经济发展水平相对较低，工业基础薄弱，农业主要以畜牧业为主，缺乏足够的就业机会吸引大量人口迁移。虽然新疆有丰富的矿产资源，但这些资源的开发和利用还未能有效地转化为促进人口增长的经济动力。 3. 人口政策：中国的计划生育政策曾对新疆等少数民族地区的人口增长产生了影响，尽管近年来政策有所调整，但这些历史因素仍然对当地人口结构和增长率产生了影响。 4. 社会服务设施：新疆的社会服务设施，如教育、医疗、住房等，相对于人口密度较高的地区而言，可能较为薄弱，这也影响了人口的吸引和留存。 5. 文化和民族因素：新疆是多民族聚居的地区，各民族的文化习俗…	新疆人口容量受到多种因素的影响，包括气候条件、自然资源、经济发展水平、政策引导等。首先，新疆的气候条件相对较为恶劣，干燥少雨，昼夜温差大，这些因素对人口生活和生产都会有一定的影响。其次，新疆拥有丰富的矿产资源和优良的牧场，这为当地人口提供了丰富的生产资源，但同时也需要合理开发利用以保持资源的可持续性。另外，新疆经济发展水平相对较低，一定程度上制约了人口增长。政策引导也是影响人口容量的重要因素，政府在新疆实施的各项政策措施将直接影响当地人口的数量和结构。总的来说，新疆人口容量受多种因素综合影响，需要在经济、社会、环境等多方面加以综合考量和管理。 。	a	b	b	model_a	model_a	model_b
新疆维吾尔自治区位于我国西北边陲，远离海洋，深居内陆，昼夜温差大，日照时间充足（年日照时间达 2 500～3500小时），降水量少，气候干燥。新疆是全国五大牧区之一,在“三山”和“两盆”周围有大量的优良牧场,牧草地总面积7.7亿亩,仅次于内蒙古,西藏,居全国第三。新疆矿产种类全、储量大，开发前景广阔。面积约占全国国土面积的 1/6，常住人口约为两千多万人，人口密度约为全国的1/10.	结合材料从限制人口容量的主要因素角度，说出新疆为提高人口容量可采取的措施。	调整农业结构，提高灌溉技术；完善交通等基础设施建设，增加资源输入；发展科技，提高资源利用率等。	要提高新疆的人口容量，可以采取以下措施：一是制定政策鼓励人口迁入；二是增加绿化面积，改善生态环境；三是开设矿物开采区，促进经济发展。通过这些措施，可以有效地提高新疆的人口容量。	为提高新疆人口容量，可以采取以下措施：首先，建设引流水源工程，以保障水资源供应；其次，降低人均耗水水平，提高水资源利用效率；同时，利用光能资源，推广可再生能源的利用，减少对传统能源的依赖；另外，加强对外开放程度，吸引外来人口和资金流入，促进经济发展；最后，提高科技水平，开发矿产资源，增加就业机会，提升人口容量。	b	stud_b	新疆维吾尔自治区由于地处内陆，气候干燥，降水量少，昼夜温差大，这些自然条件限制了其人口容量。为了提高人口容量，新疆可以采取以下措施： 1. 水资源管理：新疆的水资源相对稀缺，因此需要加强水资源的管理和利用。可以通过建设水库、引水工程等方式，提高水资源的利用效率，满足人口增长带来的水需求。 2. 气候适应性农业：新疆的干旱气候限制了农业生产。可以通过引进适应性强的作物品种、采用节水灌溉技术等方式，提高农业生产的效率和产量。 3. 促进工业化和城市化：通过发展工业和城市化，可以减少对自然资源的依赖，提高经济的多元化水平，从而缓解人口对自然资源的压力。 4. 优化人口结构：鼓励生育政策的调整，提高女性的教育水平和就业机会，减少人口的自然增长率，促进人口结构的优化。 5. 环境保护和生态建设：加强环境保护和生态建设，恢复和保护草原、森林等自然生态系统，提高生态系统的服务能力，增强自然环境的承载能…	新疆地区的人口容量受到多方面因素的限制，其中主要包括气候条件、自然资源供给能力、基础设施建设等因素。为了提高人口容量，新疆可以采取以下措施： 1. 加大基础设施建设力度，提高区域发展水平，吸引更多人口向新疆迁移定居。 2. 加大对牧业、矿产等资源的开发力度，增加经济活动，提高就业机会，吸引更多人口前往新疆谋求生计。 3. 加强生态环境保护，提高土地资源的利用效率，保障生态环境的可持续发展，为更多人口提供生存空间。 4. 提高教育、医疗等公共服务水平，改善生活质量，吸引更多人口留在新疆。 综上所述，通过加大基础设施建设、资源开发利用、生态环境保护和公共服务水平提升等措施，可以有效提高新疆的人口容量。。	a	b	b	model_a	model_a	model_b
新疆维吾尔自治区位于我国西北边陲，远离海洋，深居内陆，昼夜温差大，日照时间充足（年日照时间达 2 500～3500小时），降水量少，气候干燥。新疆是全国五大牧区之一,在“三山”和“两盆”周围有大量的优良牧场,牧草地总面积7.7亿亩,仅次于内蒙古,西藏,居全国第三。新疆矿产种类全、储量大，开发前景广阔。面积约占全国国土面积的 1/6，常住人口约为两千多万人，人口密度约为全国的1/10.	新疆面积166万km’，与新疆相比，日本面积小、矿产资源贫乏，所以日本环境人口容量更小，这种说法正确吗？谈谈你的看法。(3分)	这种说法错误。相对新疆，日本面积小、矿产资源贫乏，但经济发达，科技水平高，对外开放程度高，环境人口容量更大。	"不对;看法：①环境人口容量不仅受面积、资源影响，还受气候、水资源等因素影响。③日本相对于新疆气候宜人，水源充足",	"不正确，新疆面积虽大但自然环境较差，日本面积小但于新疆相比自然条件好有充足的水资源．且面积小、人口多表明该地区的环境承受力大",	a	stud_a	新疆面积166万平方公里，确实远远大于日本的面积。日本的面积约为37700平方公里，相比之下，新疆的面积是日本的约4.4倍。这种面积上的差异确实导致了环境人口容量的差异。 首先，面积大的地区通常拥有更广阔的自然资源，包括土地、水资源和生物多样性。新疆作为一个内陆地区，虽然气候条件较为恶劣，但其面积巨大，牧草地总面积达7.7亿亩，矿产资源种类全、储量大，这为其提供了较大的环境人口容量。 相比之下，日本是一个岛国，地理位置特殊，自然资源相对有限。日本的矿产资源虽然在某些方面有所开发，但总体而言与新疆相比，矿产资源的种类和储量都较为贫乏。此外，日本的土地利用效率较高，人口密度也较高，这进一步限制了其环境人口容量。 因此，新疆与日本在面积和矿产资源方面的差异确实导致了环境人口容量的差异。新疆由于其广阔的自然资源和较低的人口密度，理论上具有更大的环境人口容量，而日本则由于资源有限和高的人口密度，其…	这种说法并不完全正确。虽然日本的面积相比于新疆确实较小，而且日本的矿产资源相对较贫乏，但日本的环境人口容量却并不一定比新疆小。日本是一个高度发达的岛国，其土地利用效率非常高，人口密度相对较大。虽然日本的面积不大，但由于其发达的经济和科技水平，人口容量并不一定比新疆小。此外，日本也实行严格的环境保护政策和资源管理措施，保护环境，维护人口可持续发展。因此，说日本环境人口容量更小并不完全准确。	b	a	b	model_b	stud_a	model_b
材料一:厄立特里亚气候干旱,降水量小而且不稳定。2007年人均国民收入仅270美元,农业是国民经济的支柱,但粮食不能自给。农业生产技术相对落后，如在平原、山地斜坡主要采用传统地面灌溉和引洪灌溉的方式，很少实施喷灌、滴灌。目前我国和厄立特里亚正在开展农业方面的合作。	简述厄立特里亚农业发展面临的主要问题以及该国可以采取的措施	问题包括水资源匮乏和资金短缺；技术力量不足。措施包括在高原修建水库与水坝，实现雨水的季节调配；培养农业技术人员；推广喷灌与滴灌等节水灌溉技术；加强国际合作，解决资金短缺困难等。	主要问题：厄立特里亚的农业发展面临着两大主要问题，一是平原地区降水稀少，淡水资源匮乏；二是位于较低纬度，光照强度大，蒸发量大。 措施：为了解决这些问题，厄立特里亚可以采取一系列措施。首先，推动发展节水农业，推广滴灌技术和地膜的使用，有效利用有限的水资源。其次，引入海水淡化技术，将淡化后的海水用于灌溉农田，缓解淡水资源短缺问题。第三，针对丘陵地区，发展林业，对平原地区则发展畜牧业，实现资源合理配置。最后，加强生态保护工作，推行轮牧轮植，预防土地荒漠化，保护农业生产环境的可持续发展。通过这些措施的实施，可以促进厄立特里亚农业的可持续发展，提高农业生产效率，保障粮食安全。	"农业发展面临的主要问题、①耕地面积小③降水分配不均,分旱、雨两季⑤淡水资源不足，经济落后。采取的措施：④修建水库、雨季存水、旱季放水⑤合理利用水资源、⑥研发海水淡化装置解决生活用水、"	b	stud_a	厄立特里亚农业发展面临的主要问题包括： 1. 气候条件：由于气候干旱，降水量小且不稳定，导致农业生产受到严重影响。 2. 人均国民收入低：2007年的人均国民收入仅270美元，限制了农业投入和技术更新。 3. 农业技术落后：农业生产技术相对落后，主要依赖传统的地面灌溉和引洪灌溉，缺乏现代灌溉技术如喷灌和滴灌。 4. 粮食自给不足：尽管农业是国民经济的支柱，但粮食不能自给，需要依赖进口。 为了解决这些问题，厄立特里亚可以采取以下措施： 1. 推广现代灌溉技术：引入和推广现代灌溉技术，如喷灌和滴灌，以提高灌溉效率和降低水资源浪费。 2. 改进土壤管理：通过轮作和有机肥料的使用来改善土壤结构和肥力，提高作物产量。 3. 水资源管理：建设和改善水利设施，如水库、渠道和灌溉系统，以更有效地利用有限的水资源。 4. 农业技术培训：为农民提供农业技术培训，提高他们的农业生产能力和管理水平。 5. 农业…	厄立特里亚农业发展面临的主要问题包括气候干旱、降水量不稳定、农业生产技术落后、粮食不能自给等。为了解决这些问题，厄立特里亚可以采取一些措施，比如推广现代化的灌溉方式，如喷灌、滴灌，提高农业生产效率；加强农业科技研究和人才培养，提高农业生产技术水平；引进适合干旱气候的抗旱作物品种，提高农产品产量和质量；加强国际合作，吸引外资和技术支持，促进农业现代化。通过这些措施，厄立特里亚可以逐步解决农业发展中所面临的问题，实现农业产业的可持续发展。	a	b	b	model_a	model_a	stud_a
材料二:沙特阿拉伯面积为225万平方千米,人口约3150万(2015年),经济以石油产业为支柱,从20世纪70年代开始成为世界上人均国民收入最高的国家之一。气候干热是沙特阿拉伯自然环境的主要特征,只有艾卜哈等少数地区降水较多。	海水淡化能源耗费大,成本较高。沙特阿拉伯是全球海水淡化产量最大的国家。简析沙特阿拉伯重视海水淡化的原因(6分)	沙特阿拉伯降水少，大部分地区为无流区，水资源严重不足；但该国油气资源丰富，能源充足，并大量出口油气创汇，经济实力强；同时该国人口少，人均国民收入高，有雄厚的财力支持海水淡化来缓解生活用水不足的问题。	沙特阿拉伯重视海水淡化的原因主要包括以下几点：首先，沙特阿拉伯的气候干热，大部分地区都是沙漠，缺乏淡水资源，因此需要进行海水淡化来解决水资源短缺问题。其次，沙特阿拉伯经济发达，有充足的资金用于投入海水淡化项目，确保水资源供应。再者，沙特阿拉伯靠近海洋，便利于引海水进行淡化处理。此外，沙特阿拉伯作为一个石油工业大国，拥有丰富的能源资源，可以保障海水淡化所需的能源消耗。因此，沙特阿拉伯重视海水淡化是基于国家的水资源需求和经济实力等多方面考量。	沙特阿拉伯是全球海水淡化产量最大的国家，主要原因有以下几点。首先，沙特阿拉伯位于低纬度地区，全年高温，水气蒸发量巨大，导致淡水资源匮乏。其次，沙特阿拉伯的河流较少，淡水资源本来就十分有限。再者，沙特阿拉伯临近红海，海水资源非常丰富，适合进行海水淡化。此外，沙特阿拉伯有大量的农业生产需求，需要大量的淡水来灌溉农田，因此海水淡化对其来说尤为重要。	a	stud_a	沙特阿拉伯作为全球海水淡化产量最大的国家，重视海水淡化的原因主要有以下几点： 1. **水资源短缺**：沙特阿拉伯的气候特征是干热，降水量稀少，导致淡水资源非常紧缺。海水淡化技术可以将海水转化为可饮用水，缓解淡水短缺的问题。 2. **经济发展需求**：沙特阿拉伯的经济以石油产业为支柱，石油行业对大量的水资源有很高的需求。海水淡化可以为石油行业提供足够的用水，支持其持续发展。 3. **人口增长压力**：沙特阿拉伯的人口增长迅速，特别是在20世纪70年代之后，随着石油收入的增加，人口数量显著增加，导致对水资源的需求也随之增加。海水淡化技术可以帮助满足人口增长带来的水资源需求。 4. **国际合作与技术进步**：沙特阿拉伯积极参与国际合作，吸收和应用先进的海水淡化技术。随着技术的不断进步，海水淡化的成本和能源消耗正在逐渐降低，这使得沙特阿拉伯更加重视海水淡化技术的发展和应用。 5. **国…	沙特阿拉伯重视海水淡化的原因有以下几个方面： 首先，沙特阿拉伯是一个干旱缺水的国家，大部分地区缺乏淡水资源。海水淡化可以有效地解决这一问题，为居民提供稳定的饮用水和用水。因此，海水淡化在改善人民生活水平和保障国家水资源安全方面具有重要意义。 其次，沙特阿拉伯作为一个以石油为主要经济支柱的国家，石油资源丰富但淡水资源稀缺。海水淡化可以为石油开采和加工提供所需的水资源，保障石油产业的顺利运转，进而促进经济的发展。 此外，沙特阿拉伯拥有丰富的海水资源，海水淡化技术成熟，可以更有效地利用这一资源。通过海水淡化，沙特阿拉伯可以提高海水资源的利用率，减少对地下水和其他淡水资源的依赖，实现水资源的可持续利用。 总的来说，沙特阿拉伯重视海水淡化是为了解决国家的水资源短缺问题，保障经济的可持续发展，以及提高海水资源的利用效率。	tie	a	a	model_a	model_a	model_b
神农架林区地处我国中部，湖北省西部，为我国地势第二阶梯向第三阶梯的过渡区城，最高峰神农顶的高程为 3 105.4 m，该地区面积约 3253 平方千米，年均气温为 11.0~12.2℃，年均降水量约 1 219.93 mm.4~10月降水量超过全年70%。神农架南北坡植被优势种群分布差异较明显,下图示意神农架林区等高线分布,	指出神农架林区的地形地势特征。	地势从南向北、自西向东趋缓；地形起伏较大，复杂崎岖；地貌类型多样，多山间河谷发育。	神农架林区的地形主要是山地和高原，地势起伏较大，整体呈现出中间高，东西低的特点。	神农架林区的地形地势特征主要是以高原和山地为主，中间高、四周低，地势起伏大，同时还有河谷地貌。	b	tie	神农架林区的地形地势特征主要表现为以下几点： 1. 地理位置：神农架林区位于中国中部，湖北省西部，是我国地势第二阶梯向第三阶梯的过渡区。这里的地势逐渐从平原向山地过渡，形成了多样的地形地貌。 2. 高程：神农架林区的最高峰是神农顶，其高程为3,105.4米。这表明该地区具有显著的山地特征，地势较高，海拔梯度较大。 3. 面积：神农架林区的总面积约为3,253平方千米，这个面积较大，说明该地区不仅有高山，还有较广阔的山地和丘陵地带。 4. 气候特征：年均气温为11.0~12.2℃，年均降水量约1,219.93毫米。特别是4月至10月的降水量超过全年70%，这说明该地区属于亚热带湿润气候，降水量集中，四季分明。 5. 植被特征：神农架南北坡的植被优势种群分布差异较明显。这可能是由于地形、气候、土壤等因素的影响，导致南坡受阳光照射较多，植物生长较为繁茂，而北坡则较为阴暗，植被较为稀疏。 综上所…	神农架林区的地形地势特征主要包括以下几点：首先，神农架林区位于我国中部，地势为第二阶梯向第三阶梯的过渡区，最高峰为神农顶，海拔高达 3 105.4 米，整体地势较高。其次，该地区面积约 3253 平方千米，地形复杂多变，包括山地、丘陵、高原等地貌类型。再者，神农架林区年均气温较低，为 11.0~12.2℃，年均降水量约 1 219.93 毫米，且4~10月降水量占全年的70%，表明降水季节明显集中。此外，神农架南北坡植被优势种群分布差异明显，反映出地形地势对植被生长的影响。总的来说，神农架林区地形地势特征复杂多样，气候条件独特，是一个典型的山地地区。	tie	a	a	model_a	model_a	model_b
神农架林区地处我国中部，湖北省西部，为我国地势第二阶梯向第三阶梯的过渡区城，最高峰神农顶的高程为3105.4 m，该地区面积约 3253 平方千米，年均气温为 11.0~12.2℃，年均降水量约 1 219.93 mm.4~10月降水量超过全年70%。神农架南北坡植被优势种群分布差异较明显,下图示意神农架林区等高线分布,	说明神农架林区山间小路蜿蜒曲折的理由。	山中小路尽量沿等高线修建，减小工程量；便于进出人员步行。	1. 为了方便行人行走，小路的坡度被减缓。 2. 小路与等高线平行，因为地形起伏大、坡度大，需要减缓坡度。 3. 这条小路位于我国第二阶级与第三阶级的过程区域，落差大、坡度大。	神农架林区山间小路蜿蜒曲折的原因有两点：一是该地地势复杂，起伏高低不平，等高线变化曲程大，因此山间小路走向大致于等高线平行，所以显得曲折；二是地势复杂，起伏大，导致小路多盘山而行，也加大了曲折的程度。	b	stud_a	神农架林区山间小路蜿蜒曲折的主要理由在于地形复杂和植被覆盖的差异。首先，神农架地处我国中部，湖北省西部，是第二阶梯地势向第三阶梯过渡区，地形起伏较大，山脉和山谷交错，形成了多种多样的地形特征。山间地形的变化导致了路线的自然蜿蜒曲折，以适应地形的变化，确保行走安全。 其次，神农架林区的南北坡植被优势种群分布差异较明显，这也影响了山间小路的走向。南坡的植被可能更加茂密，坡度较为平缓，而北坡则可能有更高的坡度和较少的植被覆盖。为了避免滑坡和保护植被，小路可能会在南坡上蜿蜒，减缓坡度的陡峭程度，同时在北坡上采用更为直线的路线，以适应地形的变化。 此外，为了保护生态环境和野生动植物的栖息地，小路设计者可能会考虑到地形的自然走向，避免破坏植被和生态系统。因此，山间小路的蜿蜒曲折不仅是出于地形适应，也是为了保护和维护神农架林区的自然环境。	神农架林区地势复杂，山高谷深，地形起伏大，因此山间小路蜿蜒曲折。这主要是由于以下几个原因： 1. 地势复杂：神农架林区地处地势第二阶梯向第三阶梯的过渡区，地形复杂多变。山势起伏大，山坡陡峭，沟壑纵横，导致道路需要蜿蜒曲折以适应地形的变化。 2. 植被茂密：神农架林区植被茂密，森林覆盖率高，道路需要顺应自然环境，绕过树木和植被，因此走势曲折。 3. 降水量大：神农架林区年均降水量较大，4~10月降水量超过全年70%，容易形成沟壑和山谷，道路需要绕过这些地形特征，使路线变得蜿蜒曲折。 4. 生态保护：神农架林区是国家级自然保护区，为了保护当地的生态环境，修建道路时需要考虑尽量减少对自然环境的破坏，因此道路设计会更加曲折。 举例来说，如果直线穿过山脉，可能会破坏当地的植被和生态环境，因此设计道路时会选择蜿蜒曲折的方式，绕过重要的生态区域。 总的来说，神农架林区山间小路蜿蜒曲折的主要原因是地形复…	tie	tie	tie	model_a	model_a	stud_a
神农架林区地处我国中部，湖北省西部，为我国地势第二阶梯向第三阶梯的过渡区城，最高峰神农顶的高程为 3 105.4 m，该地区面积约 3253 平方千米，年均气温为 11.0~12.2℃，年均降水量约 1 219.93 mm.4~10月降水量超过全年70%。神农架南北坡植被优势种群分布差异较明显,下图示意神农架林区等高线分布,	分析神农架南北坡植被优势种群分布差异较明显的主要原因。	神农架山区南坡为阳坡、夏季风的迎风坡，光照强，热量条件好，降水量大，植被生长茂盛，同一自然带分布的海拔高度高于同海拔的北坡。	南坡位于阳坡，光照充足，热量充足，因此植物生长条件更好，植被更为茂盛。而北坡位于阴坡，背风坡，降水量相对较少，导致植物生长受到一定影响，造成南北坡植被优势种群分布差异较明显。	①北坡地势较南坡平坦，导致水分在北坡更容易滞留，促进植被生长。②北坡受来自北冰洋带来的水汽影响，降水较丰沛，为植物提供了充足的水分资源。③南坡光照条件优良，降水多，水热条件好，有利于植物的光合作用和生长发育。	a	stud_a	神农架林区南北坡植被优势种群分布差异较明显的主要原因可以从地理环境、气候条件和生态适应性等方面进行分析。 首先，地理环境因素是影响植被分布的重要因素。神农架林区地处中部山区，南北坡的坡度、坡向和地形特征不同，导致了土壤类型、土壤肥力和水分供应等方面的差异。例如，南坡通常比北坡更为湿润，土壤更为肥沃，这为南坡上的某些优势种群提供了更好的生长条件。 其次，气候条件也是影响植被分布的关键因素。神农架林区的年均气温和降水量有所差异，南北坡的日照时间、温度和降水量也存在差异。南坡由于地势较低，日照时间较长，温度较高，而北坡则较为寒冷，日照时间较短。这些气候差异使得不同种群对环境的适应性有所不同。 再者，生态适应性也是影响植被分布的重要因素。不同种群在生长过程中对环境的适应性不同，某些种群可能更适应南坡的湿润环境，而某些种群则更适应北坡的干旱环境。例如，南坡的湿润环境可能更适合一些喜湿的树木和灌木，…	神农架南北坡植被优势种群分布差异较明显的主要原因可能包括以下几点： 1. 高程差异：神农架地区最高峰神农顶的高程为 3 105.4 m，南北坡的高程差异较大，这会导致气候、土壤等环境因素的差异，从而影响植被的生长分布。 2. 降水分布：根据数据显示，4~10月降水量超过全年70%，南北坡在降水量分布上也可能存在差异，这会直接影响植被的分布情况。 3. 阳光照射：南坡和北坡在阳光照射时间和强度上也有所不同，这会导致植被在南北坡生长的适应性有所差异。 4. 土壤条件：南北坡的土壤类型和质地可能存在差异，这也会对植被的生长分布产生影响。 综上所述，神农架南北坡植被优势种群分布差异较明显的原因主要包括高程差异、降水分布、阳光照射和土壤条件等因素。这些因素使得南北坡环境条件有所不同，从而导致植被分布的差异性。。	tie	a	a	model_a	stud_a	stud_a
根据中央的战略部署，江苏省和新疆维吾尔族自治区确立了相互协作关系，江苏省的部分企业陆续转移至新疆。	简述江苏和新疆相互协作对两省经济发展的积极影响	对新疆的影响包括获得资金、技术和管理经验，有利于产业升级；促进资源优势转化为经济优势。对江苏的影响包括缓解资源紧张局面，扩大市场。	江苏和新疆相互协作对两省经济发展有着积极影响。对江苏来说，这种合作有助于促进产业升级，改善生态环境，减少劳动力成本，从而实现利润增长。而对新疆来说，合作则促进了本地经济增长，增加了就业岗位，提高了就业率。	江苏和新疆相互协作对两省经济发展产生了积极影响。对于江苏来说，这种合作有助于减少环境污染和能源消耗，同时调整产业结构，使生产要素集中到新的产业领域。而对于新疆来说，合作加快了工业化和城市化进程，促进了以交通为重点的基础设施建设，同时也促进了就业和区域经济发展。这种互相支持的合作关系助力于两省经济的持续发展。	b	stud_b	江苏省和新疆维吾尔族自治区之间的相互协作关系，通过企业的转移和合作，带来了双方经济发展的积极影响。 首先，江苏省的企业转移至新疆，促进了新疆的工业化和城市化进程。例如，江苏的电子信息、纺织服装等行业企业在新疆的投资和运营，为当地提供了就业机会，提升了当地居民的收入水平。此外，这些企业的引入也为新疆的基础设施建设提供了资金支持，改善了交通、能源供应等条件，有助于新疆的经济结构优化和产业升级。 其次，新疆的资源优势与江苏的产业优势相结合，促进了资源的有效利用和产业的多元化发展。新疆丰富的矿产资源和江苏的先进制造技术的结合，促进了新能源、绿色建筑材料等新兴产业的发展，为江苏企业提供了新的市场和增长点。 再者，这种协作关系还促进了两地之间的贸易和投资，增强了区域经济的互联互通。江苏企业在新疆的投资和生产，增加了两地之间的物流往来，促进了商品和服务的流通，提升了区域内的经济活力。 最后，这种合作还…	江苏和新疆相互协作对两省经济发展带来了积极影响。首先，江苏省的企业转移至新疆可以促进新疆的产业发展，提升当地就业水平，增加税收收入。其次，江苏省的先进技术和管理经验可以带动新疆的技术水平和产业升级，提高新疆的产业竞争力。此外，两地在经济合作中可以互通有无，资源共享，形成互利共赢的局面，推动两地经济的稳步增长。最终，江苏和新疆相互协作会加强两地的经济联系和合作意识，促进区域经济一体化发展。	a	b	b	tie	model_a	model_b
横贯关中平原（也称渭河平原）的渭河全场 787 千米。关中平原是中国历史上农业最富庶地区之一，也是目前陕西省城市最多、人口密度最大、经济最发达的地带。近年来,渭河流域水资源紧缺问题日益严重。	结合材料，从地形、植被方面指出陕南、关中地区的自然景观特征	陕南地形以山地、汉江谷地为主，植被以亚热带常绿阔叶林为主；关中渭河平原为主，植被以温带落叶阔叶林为主。	陕南地区地势低，地形平坦，植被主要为常绿阔叶林带。而关中地区地势也平坦，平原广阔，土壤肥沃，植被则以温带落叶阔叶林为主。	陕南地区地势崎岖不平，海拔高，山地起伏，上下落差大，植被茂密，土地肥沃。关中地区也具有这些特征。	a	stud_a	陕南地区的地形主要由山地和丘陵构成，植被以亚热带和热带常绿阔叶林为主。由于地形的起伏变化，陕南地区的自然景观特征呈现出多样性和丰富性。例如，秦岭山脉是陕南地区的主要山脉之一，拥有丰富的生物多样性和独特的地质景观，如丹阁奇峰、五丈原等自然风光名胜。 相比之下，关中地区的地形主要是平原和低洼地带，植被以温带草原和农田为主。由于历史上农业发达，关中平原的自然景观特征更多地体现在其农业景观上，如金色的麦浪、绿色的油菜花海等。同时，由于关中平原是中国历史文化的发源地，自然景观与人文景观相结合，形成了独特的历史文化景观，如华山、华清池等。 然而，随着水资源紧缺的问题日益严重，两地区的自然景观特征也面临着挑战。例如，水资源的短缺可能导致植被退化，农业景观的变化，进而影响当地的生态平衡和生物多样性。	从地形上来看，陕南地区以秦岭山脉为界，地势多为山地和丘陵地形，山峦起伏，沟壑纵横，地势较为险峻。而关中地区则是一个平原地带，地势平坦，土地肥沃，适合农业生产。植被方面，陕南地区的植被类型主要是针叶林和阔叶林，植被丰富，生态环境良好。而关中地区由于地势平坦，植被类型以草原和耕地为主，植被相对较少。因此，陕南地区在自然景观上以山水风光为主，而关中地区则以平原农田为主。 。	b	a	a	model_a	stud_a	stud_a
材料1:石漠化指因水土流失导致地表土壤损失,基岩大面积裸露,土地基本丧失农业利用价值和生态环境退化的现象。我国石漠化多发生在亚热带石灰岩地区。材料2:贵州省铜仁市印江县郎溪镇曾是铜仁地区石漠化最严重的区域之一,“开荒开到天,种地种到边。春耕一大坡,秋收几小箩”是朗溪镇居民以前的真实写照。材料3:从90 年代起,朗溪镇就开始着手石漠化问题,朗溪镇结合当地地形,同步开展“长藤结瓜”与“经果林”工程-以路为“藤”，把降水引入蓄水池；以池为“瓜”，沿途修建蓄水池，改善地表集水功能，提高生产生活储水量，保障了经果林的正常有效补灌,同时配套建设机耕道、作业便道等基础设施。经过治理，曾经的石山荒山，如今全部披上绿色新装，呈现出“一年四季春常在、春夏秋冬果飘香”的规丽景象,尤其在春、秋两季,桃树、李子树、橘子树开花、成熟时吸引大量游人前来观赏、游玩、购买绿色水果。	结合材料2,简述石漠化对当地地理环境的影响	土地退化，土壤肥力下降；自然灾害频发，农业生产减产；地表植被破坏、生态环境恶化；制约当地社会经济发展。	石漠化对当地地理环境的影响主要表现在植被稀少、降水减少、地下水流失、农业减产、自然景观遭到破坏以及影响自然资源的合理开发利用等方面。	石漠化会导致水土流失和土地荒漠化，进而可能引发滑坡和泥石流等自然灾害。由于降水量减少，地面也会出现下陷现象。	b	stud_b	结合材料2，石漠化对朗溪镇的地理环境产生了深远的负面影响。首先，石漠化导致了大量的水土流失，地表土壤被侵蚀，基岩逐渐裸露，这直接破坏了当地的土地结构和肥力，严重影响了农业生产。其次，随着土壤的丧失，生态环境也随之退化，原本宜于种植的土地变得荒凉无用，生物多样性大幅度减少。再者，石漠化还影响了当地的气候条件，减少了地表的蒸发和降水，进一步加剧了水资源的短缺。材料2中提到的“开荒开到天，种地种到边”的现象，反映了当地土地资源的极度过度开发和利用，石漠化的严重程度也因此而显著。总之，石漠化对朗溪镇的地理环境造成了严重破坏，影响了当地的生态平衡和经济发展。	石漠化对当地地理环境的影响主要表现在土地基本丧失农业利用价值和生态环境退化。在铜仁地区的朗溪镇，由于石漠化严重，导致土地裸露、水土流失严重，农作物生长受阻，农民在开垦土地时遇到困难，耕作面积有限，产量低下。此外，石漠化还会导致水资源匮乏、生态系统失衡，对当地环境造成严重破坏。 经过治理，朗溪镇结合当地地形，采取了“长藤结瓜”与“经果林”工程，通过引水蓄水、改善地表集水功能等措施，有效解决了石漠化带来的问题。如今，经果林蓬勃发展，呈现出一片绿色生机勃勃的景象，吸引了大量游客前来观赏、游玩。这表明治理石漠化对当地地理环境的改善具有积极的作用。 。	a	b	b	model_a	model_a	model_b
材料1:石漠化指因水土流失导致地表土壤损失,基岩大面积裸露,土地基本丧失农业利用价值和生态环境退化的现象。我国石漠化多发生在亚热带石灰岩地区。材料2:贵州省铜仁市印江县郎溪镇曾是铜仁地区石漠化最严重的区域之一,“开荒开到天,种地种到边。春耕一大坡,秋收几小箩”是朗溪镇居民以前的真实写照。材料3:从90 年代起,朗溪镇就开始着手石漠化问题,朗溪镇结合当地地形,同步开展“长藤结瓜”与“经果林”工程-以路为“藤”，把降水引入蓄水池；以池为“瓜”，沿途修建蓄水池，改善地表集水功能，提高生产生活储水量，保障了经果林的正常有效补灌,同时配套建设机耕道、作业便道等基础设施。经过治理，曾经的石山荒山，如今全部披上绿色新装，呈现出“一年四季春常在、春夏秋冬果飘香”的规丽景象,尤其在春、秋两季,桃树、李子树、橘子树开花、成熟时吸引大量游人前来观赏、游玩、购买绿色水果。	结合材料，简述朗溪镇治理石漠化过程中的主要措施	植树造林，大力发展林果业；兴修蓄水池，改善农业生产用水；兴修机耕道、作业使道等基础设施，改善农业生产条件；大力发展旅游观光产业，带动水果销售。	朗溪镇治理石漠化的主要措施包括修建蓄水池、植树种草以保护环境和生态，建设机耕道、企业便道等基础设施，以防治水土流失。	为了治理朗溪镇的石漠化问题，采取了一系列主要措施。首先，建设了蓄水工程，确保了灌溉用水的供应。其次，种植果树，既能保证经济效益，又能保护水土，预防水土流失。第三，合理利用水资源，综合治理生态环境，推进工程建设。最后，发展旅游业，保障了经济效益，促进了第三产业的发展。这些措施共同作用，有效地改善了朗溪镇的石漠化问题。	b	stud_b	朗溪镇治理石漠化的主要措施包括： 1. 结合当地地形，实施“长藤结瓜”工程：通过将道路作为“藤”，引导降水流向蓄水池，改善地表的集水功能，提高生产生活的储水量。同时，沿道路修建蓄水池，以此来保障经果林的正常有效补灌。 2. 实施“经果林”工程：通过种植各种果树，如桃树、李子树、橘子树等，形成多层次的林地结构，实现一年四季的果实生产。这种方式不仅有助于改善生态环境，还能提供经济效益。 3. 配套建设基础设施：包括修建机耕道和作业便道等，确保农业生产的便利性和效率。 通过这些措施，朗溪镇不仅有效地治理了石漠化问题，还创造了一个充满生机和经济价值的生态环境。特别是在春、秋两季，镇上的果树盛花盛果，吸引了大量游客，促进了当地的旅游业和绿色水果的销售。	朗溪镇治理石漠化的主要措施包括“长藤结瓜”与“经果林”工程。具体来说，他们以路为“藤”，将降水引入蓄水池，以池为“瓜”，沿途修建蓄水池，改善地表集水功能，提高生产生活储水量，保障经果林的正常有效补灌。同时，他们还配套建设了机耕道、作业便道等基础设施，为土地的治理提供了便利条件。这些措施的实施，使原本的石山荒山变成了绿色新景观，形成了“一年四季春常在、春夏秋冬果飘香”的美丽景象。在春、秋两季，各种水果树的开花、结果更是吸引了大量游人前来观赏、游玩、购买绿色水果，为朗溪镇的生态环境和经济发展带来了积极的影响。	tie	b	b	model_b	model_a	model_b
纳木错位于青藏高原南部,西藏自治区中部(如图甲所示),是西藏第二大湖泊,也是我国第三大成水湖。湖面海拔4718米,形状近似长方形,东西长 70 多千米，南北宽30多千米，面积1920多平方千米,湖区周边风力较大且变化明显。	分析青藏高原的高寒气候环境对该区农业生产的影响。	有利影响包括晴天多，日照时间长，有利于植物进行光合作用，单产高；昼夜温差大，夜晚气温低，农作物呼吸作用弱，消耗营养物质少，有利于作物脂肪和蛋白质的积累，营养价值高；地势高紫外线线强，杀菌作用强，病虫害少；污染少，农产品品质高等。不利影响包括气温较低，热量不足，农作物一年只能一熟，仅适合喜温凉、生长周期长的作物生长。	在青藏高原的高寒气候环境下，对农业生产有着明显的影响。首先，该地区的优势在于云层薄，光照充足，昼夜温差大，这有利于作物生长。同时，低温环境也减少了虫害的发生。然而，也存在一些劣势。首先是温度较低，热量不足，影响作物的生长。其次，由于海拔较高，水汽的风吹不上来，导致降水较少。此外，高寒气候下的土壤大多为冻土，不利于耕作。因此，在青藏高原的高寒气候环境中，农业生产面临着诸多挑战。	分析青藏高原的高寒气候环境对该区农业生产的影响如下：首先，生态环境脆弱，不利于大量开荒。其次，气候寒冷，不易于农作物的生长，只能发展耐寒作物。再者，河谷地带气温较高，可发展河谷农业。最后，气温低不利于病菌生长，可减少作物农药的使用。	a	stud_a	青藏高原的高寒气候环境对该区农业生产产生了显著的影响。首先，高海拔导致空气稀薄，氧气含量较低，这对农作物的生长造成了限制。例如，农作物的光合作用需要足够的氧气，而在高海拔地区，植物根部吸收的水分和养分也会受到影响。 其次，高原地区的温度较低，日夜温差大，这会影响作物的生长周期和生长速度。例如，农作物的生长季节可能会缩短，导致产量下降。此外，低温还可能导致作物受冻，尤其是在春季和秋季，农作物可能会因为早期冻害或晚期冻害而遭受损失。 再者，高原地区的降水量相对较少，且多为雨水少、雪水多的形式，这对农业生产也带来了挑战。农作物需要适量的水分来进行生长，而高原地区的水分供应不稳定，可能会导致干旱或水分过多的情况。 最后，风力在湖区变化明显，可能会对农作物的生长造成破坏。强风可能会导致作物被吹倒，或者干扰农作物的生长环境。 为了适应这些挑战，农民们在青藏高原上发展了一些特殊的农业技术和作物种植方式…	青藏高原的高寒气候环境对该区农业生产有着显著的影响。首先，高寒气候使得纳木错周围地区的气温较低，季节变化明显，冬季漫长而严寒，春季来临较晚，这对植物的生长和发育造成了一定的影响。其次，高寒气候下的土壤肥力较低，植被稀疏，土壤贫瘠，这也给农作物的生长带来了一定的困难。此外，高海拔地区日照时间相对较短，光照强度较弱，这也会影响作物的生长。然而，青藏高原的高寒气候环境也适合发展高寒作物，比如青稞、青菜等，这些作物更适应寒冷气候，因而在这一地区也有一定的农业生产。 举例来说，在纳木错周围地区，当地农民主要种植适应高寒气候的作物，比如青稞、青菜等，这些作物能够在寒冷的气候条件下生长，保证了当地农业的基本生产。此外，农民们还会通过改良土壤、选育适应性强的品种等措施来应对高寒气候环境带来的挑战。 。	a	a	a	model_a	stud_a	stud_a
西欧的荷兰是世界上是典型的沿海低地国家，国土面积4.15万平方千米。该国其地势低洼，近四分之一的土地低于海平面，仅三分之一的地面高出海平面一米，其余地区海拔多在 10-30 米之间。1920 年开始修建的长达 30 千米的须德海拦海大坝排成纳淡，并投入大量风车进行围海造田。大坝建成后开垦出的新土地超过1700平方千米,造就了荷兰最年轻的省份--弗莱福兰省,大坝上修建了双向 4 车道高速公路，是世界上最长的防洪堤坝。现代物流业是一个新型的跨行业、跨部门、跨区域、渗透性强的复合型产业。涉及海陆空运输装卸搬运及其运输服务业、仓储业、批发业、零售业。荷兰政府通过实施转口贸易发展战略,成为欧洲物流中心，欧洲 70%的物流分拨中心落户荷兰，美国和亚洲在欧洲企业一半以上的物流业务被荷兰包揽。物流产值已超过其国内生产总值的 30%，成为国民经济的支柱产业。	简析荷兰围海造陆的优势自然条件。	多海湾，风浪小；浅海大陆架，水域浅；入海河流带来大量泥沙。	荷兰围海造陆的优势自然条件包括：濒临海洋且地形成袋状，便于施工；海拔相对较浅。	荷兰围海造陆的优势自然条件包括气候温和，海水不结冰，有利于施工。荷兰受温带海洋气候影响，全年气候温和，这有利于施工工作。此外，荷兰吹中纬度西风，一部分地形可减少水流冲击，有利于围海造陆。	a	stud_b	荷兰围海造陆的优势自然条件主要体现在以下几个方面： 1. 海岸线资源：荷兰位于西欧的北海沿岸，拥有长而连续的海岸线，这为围海造陆提供了丰富的自然资源。长的海岸线意味着更多的海域可以被利用来进行造田和建设。 2. 地形特征：荷兰的国土大部分是低洼的平原，这使得水利工程的建设相对容易。低洼的地形也意味着水可以被有效地控制和管理，这对于围海造陆和防洪堤的建设至关重要。 3. 气候条件：荷兰的气候属于温带海洋性气候，降水量相对丰富，年雨量大约在800毫米左右，这为农业生产提供了充足的水分。同时，海洋性气候的特点是降水量相对均匀分配，减少了旱涝灾害的风险。 4. 水利工程成果：荷兰在历史上投入巨大的人力和物力修建了众多的水利工程，如须德海拦海大坝等。这些工程不仅能够有效地控制水流，防止洪水泛滥，还能够通过围海造田开辟出新的土地资源。 5. 地理位置：荷兰位于欧洲的西北部，地理位置便利，连接着大西洋…	荷兰围海造陆的优势自然条件主要体现在以下几个方面： 1. 地势低洼：荷兰地势低洼，有大量的海域可以利用进行围海造田，这为荷兰创造了围海造陆的天然条件。 2. 海拦海大坝：荷兰修建了长达30千米的须德海拦海大坝，这种工程设施在其他国家可能不容易实现，而荷兰正是利用这种大坝来开垦新土地。 3. 投入大量风车进行围海造田：荷兰投入了大量的风车进行围海造田，这种独特的方式也是荷兰围海造陆的一个优势条件。 4. 地势适宜：荷兰近四分之一的土地低于海平面，仅三分之一的地面高出海平面一米，其余地区海拔多在10-30米之间，这种地势适宜也为围海造陆提供了条件。 总的来说，荷兰围海造陆的优势自然条件主要在于地势低洼、海拦海大坝、投入大量风车进行围海造田以及地势适宜等方面。这些条件使得荷兰能够利用自然资源进行围海造陆，从而创造出大量的新土地来支持国家的发展。	tie	a	a	model_a	model_a	model_b
西欧的荷兰是世界上是典型的沿海低地国家，国土面积4.15万平方千米。该国其地势低洼，近四分之一的土地低于海平面，仅三分之一的地面高出海平面一米，其余地区海拔多在 10-30 米之间。1920 年开始修建的长达 30 千米的须德海拦海大坝排成纳淡，并投入大量风车进行围海造田。大坝建成后开垦出的新土地超过1700平方千米,造就了荷兰最年轻的省份--弗莱福兰省,大坝上修建了双向 4 车道高速公路，是世界上最长的防洪堤坝。现代物流业是一个新型的跨行业、跨部门、跨区域、渗透性强的复合型产业。涉及海陆空运输装卸搬运及其运输服务业、仓储业、批发业、零售业。荷兰政府通过实施转口贸易发展战略,成为欧洲物流中心，欧洲 70%的物流分拨中心落户荷兰，美国和亚洲在欧洲企业一半以上的物流业务被荷兰包揽。物流产值已超过其国内生产总值的 30%，成为国民经济的支柱产业。	须德海拦海大坝建设后,原须德海的水域变成了淡水湖。描述须德海变成淡水湖的过程。	拦海大坝阻挡了海潮；通过拦海大坝的闸门调控水流，将成水排出；雨水补给和河流不断汇入，持续降低盐度，使该海域最终成为淡水湖。	须德海拦海大坝建成后，随着每天持续注入淡水湖的水，须德海的水域逐渐变成了淡水湖。当水域达到一定程度时，大坝打开排出海水，直至淡水湖的水完全填满了须德海。	随着须德海拦海大坝的建成，原本的须德海水域逐渐变成了淡水湖。大坝的建成阻断了海水源的进入，使得水体停止与外部海水交换。随着时间的推移，水中的盐分开始逐渐沉淀，导致水体含盐度逐渐减少。同时，河流不断向湖中补给淡水，使得湖中的含盐度不断降低，最终形成了一个淡水湖。	b	stud_b	须德海拦海大坝的建设是一个复杂的工程，它涉及到水力学、地质学和环境工程等多个领域。以下是该工程变更须德海为淡水湖的过程简述： 1. **规划与设计**：在1920年左右，荷兰政府和工程师们开始规划和设计须德海拦海大坝。他们的目标是通过建造大坝来阻止海水进入低洼的土地，并利用风力发电机来提供必要的能量来维持水位。 2. **建设阶段**：工程开始后，工程师们首先需要在须德海的两岸挖掘并建造大坝。这个过程需要大量的劳动力和现代的机械设备。随着大坝的建成，海水被阻隔在大坝的另一侧，而大坝的另一侧则逐渐形成了一个封闭的水域。 3. **排水与填海**：在大坝建成后，荷兰人通过开挖排水渠道，将海水排出水域，同时利用风力发电机来维持水位。随着水位的下降，海底的土地逐渐暴露出来，成为可以用于农业和其他用途的新土地。 4. **新土地的开垦**：随着水域内的水量减少，海底的土地逐渐变成可以耕种的土地。荷…	须德海拦海大坝的建设是为了防止海水侵袭并开垦新土地，其中一个重要的结果就是原本的须德海水域变成了淡水湖。这个过程主要是通过大坝的阻挡作用，阻止了海水的进入，同时通过排水系统将海水排出，使原本的海水逐渐被淡水替代。随着时间的推移，原本的咸水环境逐渐被淡水环境所取代，形成了今天的须德湖。 举例来说，类似的过程也发生在美国的三峡大坝建设后，原来的长江水域也变成了淡水湖。这种过程是通过人工干预和控制水流的方式实现的，最终形成了新的淡水生态系统。 。	b	b	b	model_a	model_a	model_b
西欧的荷兰是世界上是典型的沿海低地国家，国土面积4.15万平方千米。该国其地势低洼，近四分之一的土地低于海平面，仅三分之一的地面高出海平面一米，其余地区海拔多在 10-30 米之间。1920 年开始修建的长达 30 千米的须德海拦海大坝排成纳淡，并投入大量风车进行围海造田。大坝建成后开垦出的新土地超过1700平方千米,造就了荷兰最年轻的省份--弗莱福兰省,大坝上修建了双向 4 车道高速公路，是世界上最长的防洪堤坝。现代物流业是一个新型的跨行业、跨部门、跨区域、渗透性强的复合型产业。涉及海陆空运输装卸搬运及其运输服务业、仓储业、批发业、零售业。荷兰政府通过实施转口贸易发展战略,成为欧洲物流中心，欧洲 70%的物流分拨中心落户荷兰，美国和亚洲在欧洲企业一半以上的物流业务被荷兰包揽。物流产值已超过其国内生产总值的 30%，成为国民经济的支柱产业。	须德海拦海大坝建成后，对荷兰填海造陆区域经济发展的积极作用。	提供水源；创造了大量的土地资源或扩大了陆地（国土）面积；提升了艾瑟尔湖两岸的交通通达度。	须德海拦海大坝的建成使荷兰填海造陆区域形成了淡水湖，为当地提供了更多的生活用水和工业用水，推动了生活水平和工业水平的提升。同时，大坝的建成稳定了填海造陆区的自然环境，促进了当地的经济发展。此外，大坝还促进了交通的稳定与发展。	1. 随着凡尔赛海堤的建成，填海造陆区域不再受海水侵袭的威胁，提供了一个稳定的自然环境。 2. 大坝的修建增加了陆地面积，扩大了人们的活动范围，进而促进了经济发展。 3. 大坝的建成有利于人口的迁入，带动了周边经济的发展。	b	stud_a	须德海拦海大坝建成后，对荷兰填海造陆区域经济发展产生了积极的影响。首先，大坝的修建和随之而来的土地开垦，为荷兰提供了大量的新土地资源，特别是弗莱福兰省的成立和发展，极大地扩大了该国的农业生产能力和土地利用范围。这些新开垦的土地不仅增加了粮食和作物的生产量，还为荷兰的畜牧业、林业等提供了更多的空间，从而促进了农业产业的整体发展。 其次，须德海拦海大坝的修建和运营还促进了荷兰的物流业发展。由于荷兰的地理位置和低洼的地形，使得该国成为一个自然的物流枢纽。须德海拦海大坝上修建的双向4车道高速公路不仅是世界上最长的防洪堤坝，也为荷兰的物流运输提供了便利的通道。荷兰政府通过实施转口贸易发展战略，成功地将荷兰打造成为欧洲的物流中心，吸引了大量的物流分拨中心，包括欧洲70%的物流分拨中心。荷兰在欧洲企业的一半以上的物流业务中占据主导地位，物流产值超过国内生产总值的30%，成为荷兰国民经济的重要支柱产业。…	须德海拦海大坝的建成对荷兰填海造陆区域经济发展起到了积极作用。首先，大坝建成后开垦出的新土地为荷兰创造了更多的发展空间，超过1700平方千米的新土地可以用于农业、工业、物流等领域的发展，促进了当地经济的增长。其次，大坝上修建的双向4车道高速公路为当地的交通运输提供了便利，加快了货物流通速度，促进了当地物流业的发展。最后，填海造陆区域的发展也吸引了大量的投资和企业进驻，带动了当地就业机会的增加，提高了居民的生活水平。 举例来说，弗莱福兰省作为荷兰最年轻的省份，正是由于填海造陆而发展起来的。这个省份拥有现代化的物流设施和便捷的交通网络，吸引了大量的跨国物流企业在此设立分支机构，促进了当地经济的蓬勃发展。 总的来说，须德海拦海大坝的建成为荷兰填海造陆区域经济的发展带来了积极的影响，推动了当地经济的多元化发展和国民经济的持续增长。 .	tie	b	b	model_a	model_a	stud_a
西欧的荷兰是世界上是典型的沿海低地国家，国土面积4.15万平方千米。该国其地势低洼，近四分之一的土地低于海平面，仅三分之一的地面高出海平面一米，其余地区海拔多在 10-30 米之间。1920 年开始修建的长达 30 千米的须德海拦海大坝排成纳淡，并投入大量风车进行围海造田。大坝建成后开垦出的新土地超过1700平方千米,造就了荷兰最年轻的省份--弗莱福兰省,大坝上修建了双向 4 车道高速公路，是世界上最长的防洪堤坝。现代物流业是一个新型的跨行业、跨部门、跨区域、渗透性强的复合型产业。涉及海陆空运输装卸搬运及其运输服务业、仓储业、批发业、零售业。荷兰政府通过实施转口贸易发展战略,成为欧洲物流中心，欧洲 70%的物流分拨中心落户荷兰，美国和亚洲在欧洲企业一半以上的物流业务被荷兰包揽。物流产值已超过其国内生产总值的 30%，成为国民经济的支柱产业。	结合所学知识，说明荷兰能够成为欧洲现代物流业中心的主要原因。	地理位置优越（面向大海，背靠欧洲大陆，位于莱茵河入海口）；经济腹地广，服务范围大；水陆交通发达；政府重视，政策扶持；科技水平高；专业化程度高；完善的金融等配套服务产业。	荷兰能够成为欧洲现代物流业中心的主要原因有以下几点：首先，荷兰综合国力强盛，复合型产业发展较快，这为物流业提供了良好的发展环境。其次，政府对物流业的支持力度大，为行业发展提供了政策和资金支持。再者，荷兰在全球物流产业中占有重要比重，具有较强的竞争力。此外，物流产业是荷兰国民经济的重要支柱之一，得到了政府和企业的高度重视和投入。最后，荷兰交通便利，市场广阔，为物流业的发展提供了便利条件，使其成为欧洲现代物流业中心。	荷兰能够成为欧洲现代物流业中心的主要原因包括政府的正确决策与发展战略、发达完善的海陆空运输、装卸搬运及相关产业，优越的地理位置靠近海洋和北海，以及发达的科技和技术投入。	b	stud_a	荷兰能够成为欧洲现代物流业中心的主要原因是其独特的地理位置、先进的基础设施和创新性的人口。以下是几个关键因素： 1. 地理位置：荷兰位于欧洲的心脏地带，紧邻北海和多个内陆水道，这使得它成为欧洲重要的海上和内河运输枢纽。荷兰的位置使得它能够轻松地与世界各地建立联系，尤其是与亚洲和美洲的贸易伙伴。 2. 先进的基础设施：荷兰拥有世界级的港口设施，例如鹿特丹港，是世界上最繁忙的港口之一。除了港口，荷兰还有一个高度发达的铁路、公路和水路网络，这些都为物流业的运输和配送提供了强大的支持。 3. 低地造田技术：荷兰的低地造田技术使得它能够在低洼的土地上进行农业生产和建设，这为物流业提供了大量的仓储和配送空间。例如，须德海拦海大坝的建设不仅为荷兰提供了新的土地，还为物流业提供了一个巨大的物流枢纽。 4. 政策支持：荷兰政府通过实施转口贸易发展战略，鼓励和支持物流业的发展。政府提供了优惠的税收政策、投资…	荷兰能够成为欧洲现代物流业中心的主要原因包括以下几点： 1. 地理位置优越：荷兰位于欧洲大陆的中心，拥有发达的水路和陆路交通网络，便于连接欧洲其他国家和地区。其主要港口鹿特丹港是欧洲最大的港口之一，是欧洲重要的物流枢纽。 2. 先进的基础设施：荷兰拥有世界领先的港口、铁路、公路、水运等基础设施，便于货物的快速流通和分拨。 3. 开放的经济政策：荷兰政府实施开放自由的经济政策，吸引了大量跨国物流企业在荷兰设立分支机构或总部，促进了物流业的发展。 4. 先进的物流技术：荷兰拥有先进的物流技术和管理经验，如自动化仓储系统、物流信息系统等，提高了物流效率和服务质量。 5. 优质的人才资源：荷兰拥有高素质的物流从业人员和管理人才，他们具有专业知识和国际视野，能够适应快速发展的现代物流业。 综上所述，荷兰之所以能够成为欧洲现代物流业中心，是由于其地理位置、基础设施、经济政策、物流技术和人才资源等多方…	a	b	b	model_a	model_a	stud_a
近年来，我国某沿海地区充分利用当地丰富的滩涂资源，大力发展牡蛎养殖业。牡蛎是营滤食生活的双壳贝类，喜栖于有适量淡水注人的内湾潮湿地带。牡蛎具有食用和药用双重价值，营养丰富，被誉为“海里的牛奶”。该牡蛎养殖区邻近的河流流域面积广，水量充沛，上游修建了多个水库，水库放水时间一般安排在夜间。随着牡蛎养殖业的不断发展，牡蛎产量不断攀升，但是近年来牡蛎的个头却变小了，影响了其食用和药用价值。	(1)分析该沿海地区牡蛎养殖业发展的有利条件。	沿海滩涂资源丰富，可供养殖多种水产品；河流水量充沛，为牡蛎养殖提供了充足的水源；淡咸水交汇，水质肥沃，有利于牡蛎生长；靠近市场，交通便利，可以方便地运输和销售产品；政府支持，劳动力充足，资金雄厚，有利于牡蛎养殖业发展。	沿海地区牡蛎养殖业发展的有利条件包括：沿海滩涂资源丰富，养殖各类水产品有助于减少水资源浪费和提高利用率，促进农业可持续发展；淡咸水交汇，水质肥沃，有利于牡蛎生长；河流低潮位放水，扩大淡水影响范围，为牡蛎提供更好的生长环境；邻近市场，交通便利，便于运输和销售产品；政府支持，劳动力充足，资金雄厚，有利于促进牡蛎养殖业的发展。	该沿海地区具有气候适宜、四季皆宜旅游的优势，河流水量充足为牡蛎养殖提供了充足的水来源，同时淡咸水交汇形成的水质肥沃，对牡蛎的生长非常有利。尽管这些优势是显而易见的，但也会带来环境质量下降和交通拥堵等问题。在这种情况下，政府应该寻找并提供足够的资金和技术支持，鼓励和促进牡蛎养殖业的发展。	a	stud_b	该沿海地区牡蛎养殖业发展的有利条件主要包括以下几点： 1. 丰富的滩涂资源：滩涂是牡蛎的理想栖息地，提供了良好的生长环境。滩涂的潮湿和适量的淡水注入满足了牡蛎的生长需求。 2. 良好的水质：该地区河流流域面积广，水量充沛，水质相对清洁，有利于牡蛎的生长发育。 3. 近海水域的适宜气候：沿海地区的气候条件适宜牡蛎的生长，海水的盐度适中，温度变化适中，减少了疾病和其他环境因素对牡蛎生长的负面影响。 4. 上游水库的调控：上游修建的水库可以通过调控水量，提供稳定的淡水供给，尤其是夜间放水可以帮助牡蛎在潮湿的环境中生长。 5. 政策和技术支持：随着牡蛎养殖业的发展，相关政策和技术支持也在不断加强，包括种苗的改良、养殖技术的进步、市场需求的提升等，这些都有利于牡蛎养殖业的健康发展。	(1) 该沿海地区具有丰富的滩涂资源，适宜牡蛎生长。滩涂环境提供了丰富的浮游生物作为牡蛎的食物来源，有利于牡蛎生长和繁殖。 (2) 水域内有适量淡水注入，符合牡蛎的生长环境要求。淡水的注入可以稀释盐度，提供适宜的生长条件。 (3) 邻近的河流流域面积广，水量充沛，上游水库的放水时间安排在夜间，有利于调节水质和水温，符合牡蛎的生长需求。 (4) 牡蛎具有食用和药用价值，市场需求大，发展潜力巨大。 (5) 当地政府和企业重视牡蛎养殖业的发展，投入资金和技术支持，促进了行业的健康发展。 举例：比如，当地政府出台了相关政策，支持企业发展牡蛎养殖业，提供了优惠政策和资金支持，引导农民转变种植方式，推动了牡蛎养殖业的快速发展。 。	b	a	a	model_b	model_a	model_b
近年来，我国某沿海地区充分利用当地丰富的滩涂资源，大力发展牡蛎养殖业。牡蛎是营滤食生活的双壳贝类，喜栖于有适量淡水注人的内湾潮湿地带。牡蛎具有食用和药用双重价值，营养丰富，被誉为“海里的牛奶”。该牡蛎养殖区邻近的河流流域面积广，水量充沛，上游修建了多个水库，水库放水时间一般安排在夜间。随着牡蛎养殖业的不断发展，牡蛎产量不断攀升，但是近年来牡蛎的个头却变小了，影响了其食用和药用价值。	(2)推测水库放水时间安排在夜间的理由。	夜间气温降低，蒸发减少，水库放水损失较小；夜间风力较弱，放水对周边环境的影响较小；夜间河流处于低潮位时放水，可以扩大淡水的影响范围，有利于牡蛎的生长。	夜间气温较低，蒸发率减少，水库放水损失减少，同时可作为灌溉水源，有利于棉纺织工业的发展。夜间风力较弱，放水对周边环境影响较小，并可增加河流泄洪能力，减少洪涝灾害风险。夜间放水时河流水位较低，有利于扩大淡水的影响范围，促进牡蛎生长。	水库夜间放水的时间安排有几个原因。首先，夜间气温较低，这有助于减少水的损失。其次，夜间放水对于灌溉水源和棉纺织工业的发展是适宜的。此外，夜间风力较小，水库放水对周边环境的影响也较小。另外，夜间河流处于低潮位时放水可以扩大淡水的影响范围，有益于牡蛎的生长。然而，需要注意的是旅游活动可能会带来垃圾和污水，对当地环境造成污染。	tie	tie	水库放水时间安排在夜间的理由主要是为了减少对牡蛎养殖的影响。白天时，牡蛎通常处于活跃状态，通过其口部的悬挂器官（称为“悬挂器”）吸附在水下岩石或其他固体表面上，以便于在潮水的上涨时被带到潮湿的滩涂上。夜间，潮水上涨时，牡蛎会被带到更深的水域，以避免在潮水下降时暴露在干燥的滩涂上。因此，安排水库放水时间在夜间，可以减少对牡蛎在白天活动时的干扰，避免牡蛎被突然的水流冲击或被过快的水流带走，从而保护牡蛎免受伤害，促进其健康成长。 然而，牡蛎个头变小可能与多种因素有关，包括但不限于水库放水的时间安排、水质变化、养殖密度过高、病虫害控制不当等。为了提高牡蛎的品质和产量，需要综合考虑这些因素，并采取相应的措施来优化养殖环境和管理策略。	水库放水时间安排在夜间的理由可能是为了避免白天牡蛎养殖区的水位波动过大而影响牡蛎的生长和养殖环境。白天牡蛎需要充分的光照和稳定的水温来保持良好的生长状态，如果在白天放水可能会导致水位快速上升或下降，造成养殖环境的不稳定，影响牡蛎的生长。而夜间放水可以减少对牡蛎养殖的影响，保持水质稳定，有利于牡蛎的健康生长。 。	b	a	a	model_b	model_a	stud_a
近年来，我国某沿海地区充分利用当地丰富的滩涂资源，大力发展牡蛎养殖业。牡蛎是营滤食生活的双壳贝类，喜栖于有适量淡水注人的内湾潮湿地带。牡蛎具有食用和药用双重价值，营养丰富，被誉为“海里的牛奶”。该牡蛎养殖区邻近的河流流域面积广，水量充沛，上游修建了多个水库，水库放水时间一般安排在夜间。随着牡蛎养殖业的不断发展，牡蛎产量不断攀升，但是近年来牡蛎的个头却变小了，影响了其食用和药用价值。	(3)简述近年来牡蛎个头变小的原因。	随着牡蛎养殖业的不断发展，牡蛎数量急剧增加，同时牡蛎的生存空间变得越来越小，食物来源也变得十分有限；此外，河流上游修建了水库，水库在夜间放水，导致河流入海的淡水含量增加。	近年来，随着牡蛎养殖业的迅速发展，牡蛎数量急剧增加，导致牡蛎生存空间变小，食物来源减少。同时，靠近河流的地区为工业提供必要的生产和生活用水，也对牡蛎的生长造成影响。	近年来，牡蛎个头变小的原因主要是由于牡蛎数量急剧增加，导致它们生存空间减少，食物来源也相应减少。不过，在水资源丰富的长江黄河等流域，可以发展渔业和水利发电等产业，为牡蛎提供更为适宜的生存环境。	a	stud_a	近年来牡蛎个头变小的原因可能包括以下几点： 1. 环境压力：随着牡蛎养殖业的快速发展，养殖密度增加，导致牡蛎在有限的空间内竞争资源，尤其是食物和空间。这种竞争可能导致牡蛎个体生长缓慢，甚至个头变小。 2. 水质变化：养殖区附近的河流流域水量充沛，上游水库的放水可能会带来较多的泥沙和污染物，影响水质。长期的水质不佳可能对牡蛎的生长造成负面影响。 3. 水文变化：水库放水时间安排在夜间可能会导致水文周期的变化，牡蛎可能无法适应这种变化，影响其生长。 4. 遗传因素：长期的人工选择和遗传改良可能导致牡蛎种群的遗传多样性下降，进而影响其个体的生长潜力。 5. 病虫害问题：养殖密度高，易于发生疾病和虫害，长期的病虫害问题可能导致牡蛎个体生长不良。 为了解决牡蛎个头变小的问题，需要综合考虑环境保护、养殖管理和遗传改良等多方面的措施，确保牡蛎养殖业的可持续发展。	近年来牡蛎个头变小的原因可能有多方面的因素导致。首先，可能是由于过度捕捞和养殖密度过高导致资源过度利用，牡蛎在有限的空间内竞争激烈，使得个体生长受到限制。其次，水库在夜间放水可能会导致水体中的氧气含量减少，影响了牡蛎的呼吸和新陈代谢，限制了其生长发育。另外，可能还存在水质污染、气候变化等因素，也会对牡蛎的生长产生负面影响。 举例来说，水库在夜间放水可能造成水流速度加快，导致牡蛎在摄取营养物质时受到影响，影响其正常生长。另外，过度捕捞和养殖密度过高也会导致牡蛎个头变小，因为资源的过度利用会使得牡蛎的生存环境受到破坏，无法获得充足的营养和空间。 总的来说，牡蛎个头变小的原因是多方面的，需要综合考虑和解决。可以通过科学合理的养殖管理措施，加强环境保护和监测，以及引入新的养殖技术等方式，来促进牡蛎的健康生长，保护牡蛎资源的可持续发展。	a	a	a	model_a	model_a	model_b
黄土高原地区是我国重要的能源基地，也是水土流失严重的地区。该地区的能源开发对区域经济的发展起到了重要作用，但同时也引发了一系列生态环境问题。近年来，该地区实施了一系列生态环境治理措施，包括退耕还林、水土保持、生态移民等。这些措施的实施有效地改善了当地的生态环境，但也带来了一些社会经济问题。	(1)分析黄土高原地区水土流失严重的主要原因。	自然原因方面该地区黄土质地疏松，易受雨水冲刷；地形起伏大，坡度陡峭加剧了水土流失；降水集中且多，暴雨侵蚀作用强烈；人为原因方面，过度开垦和过度放牧等不合理的土地利用破坏了地表植被，加剧了水土流失。	黄土高原地区水土流失严重的主要原因包括黄土质地疏松易受雨水冲刷、人口密集经济发达对水资源需求大、地形起伏大坡度陡峭加剧水土流失等因素。然而，梯田的修建可以改变坡面微小地形，有助于减少水土流失。降水多且暴雨强，对侵蚀作用加剧，夜间气温低蒸发弱，水库放水损失较小。此外，过度开垦与过度放牧等不合理的土地利用也会加剧水土流失。	加大政府投入并推动水土保持工作是减轻黄土高原地区水土流失的重要举措。同时，种植耐旱作物能减少灌溉次数和灌溉量，进而降低水资源消耗。教育宣传也至关重要，让更多人了解水土流失的危害。最后，制定相关政策从根本上解决水土流失问题。	a	stud_a	黄土高原地区水土流失严重的主要原因包括： 1. 地理地形因素：黄土高原地形多为山地丘陵，坡度较大，土壤易脱水，流失速率高。长期的水力侵蚀和风力侵蚀加剧了水土流失。 2. 土壤类型：黄土高原的土壤主要是黄土壤，土壤结构疏松，含水量低，水分容易蒸发，土壤易被风和水侵蚀。 3. 气候条件：黄土高原位于半干旱气候区，降水量较少，雨季集中，雨量多而短，导致土壤水分迅速蒸发和渗透，增加了水土流失。 4. 人类活动：历史上，黄土高原地区的农业开发和人口增长导致土地开垦增加，耕地面积扩大，进一步加剧了水土流失。 5. 生态系统破坏：长期的过度放牧和不合理的林木采伐破坏了原有生态系统，减少了植被覆盖，降低了土壤的稳定性，增加了水土流失。 这些因素相互作用，共同导致了黄土高原地区水土流失的严重问题。	黄土高原地区水土流失严重的主要原因包括以下几点：首先，该地区地形起伏大，土壤贫瘠，降水不足，植被覆盖度低，易发生水土流失。其次，长期以来的过度人为开发，如过度砍伐植被、过度耕种等，破坏了土壤结构，加速了水土流失的发生。再者，陡坡耕地面积较大，耕种方式传统，缺乏科学的水土保持措施，也导致了水土流失的加剧。最后，气候变化等自然因素的影响也使得该地区水土流失问题更加严重。	a	a	a	model_b	stud_a	model_b
读我国长江流域及甲地景观、乙地放大图,完成下列问题。	说出甲地河流地貌的剖面特点，并简述成因	河谷剖面较陡、深、呈“v”形。成因：由于落差大，水流急，水流向下的侵蚀作用强而形成。	甲地河流地貌呈现出V形状，河水侵蚀河岸两侧，土壤逐渐被冲刷，最终形成这种地貌。这种地貌形成的原因是河水长期侵蚀河岸，使得河床逐渐下降，同时河水冲刷河岸的土壤，造成了V形的地貌特征。	特点是河流蜿蜒盘旋，重山峻岭，地形曲折。这种地貌形成的原因是由于流水在河谷地区流动时，受到两岸岩性的差异影响，导致河水对两岸的侵蚀作用不同，进而形成了河谷地貌。	a	stud_a	甲地位于中国长江流域，这个地区的河流地貌主要是由长江及其支流的流动和沉积作用形成的。长江流域的河流地貌剖面特点通常包括以下几个方面： 1. 河谷平原：长江及其支流在流经平坦的盆地时，会形成宽阔的河谷平原。这些平原通常由河流沉积的泥沙和冲积物构成，如长江中下游的江南平原。 2. 河岸阶地：河岸阶地是河流两岸由于长期的沉积作用形成的阶梯状地形。这些阶地通常由不同年代的沉积层构成，每一层代表着河流在不同时期的水位和流速变化。 3. 河道弯曲：长江及其支流在流经某些地区时，由于地质结构的影响，会形成弯曲的河道。这些弯曲河道往往伴随着河岸侵蚀和沉积的不同，形成了独特的地貌特征。 4. 河谷阶地：在河谷的两侧，随着河流的侵蚀和沉积，会形成一系列的阶地。这些阶地的高度和宽度取决于河流的历史流速和水量。 成因方面，长江流域河流地貌的形成主要是由于以下几个因素： - 长江及其支流的流动：长江的水流携带着大…	甲地河流地貌的剖面特点是呈现出典型的V形谷地形，即河谷两侧陡峭，河道较为狭窄深切，河流流速较快。这种地貌形态的成因主要是长期的河流侵蚀作用。当河流在地表侵蚀时，会不断地深切河床，同时河水流速加快，河流流域的侵蚀力也会增强，从而形成V形谷地貌。 举例来说，长江流域的三峡地区就是一个典型的V形谷地貌，长期的长江侵蚀作用使得三峡地区的河谷陡峭深切，形成壮丽的峡谷景观。 。	b	a	b	model_b	stud_a	model_b
读我国长江流域及甲地景观、乙地放大图,完成下列问题。	指出长江乙河段流水作用的主要形式，并说明判断依据。	形式为流水堆积作用。依据：流经平原地区，地形平坦，河道弯曲，水流缓慢。	长江乙河段流水作用的主要形式是侵蚀作用和沉积作用。根据长江流域地势特点，长江自西向东流，流速逐渐减小，在地势较缓的地方，流水作用减弱，导致细颗粒物沉积。由于长时间的流水侵蚀作用，逐渐形成了“牛轭湖”。	长江乙河段流水作用的主要形式是河曲地貌。这是通过河流对河道的不断侵蚀和侵出，使得两岸凸岸堆积，从而使河流的整体形态不断发生变化，形成了s形河曲地貌。根据图中该河段呈现出的s形形态可以判断出这一点。	a	stud_a	长江流域的乙河段流水作用主要包括侵蚀、运移、沉积和冲刷等形式。这些作用可以通过观察河道的形态、水流的速度和水质等因素来判断。 首先，长江乙河段的侵蚀作用是显著的。由于水流的速度和水量，河岸和河床的岩石和土壤被不断地剥离和搬运。例如，在长江中游的三峡大坝上游，水流速度快，河岸坡度陡，导致河岸侵蚀严重。 其次，长江乙河段的运移作用也很明显。水流携带的泥沙和其他物质被运输到下游地区，这一过程不仅影响了河道的形态，还对下游地区的土地利用和生态环境产生了影响。例如，长江下游的三角洲地区，由于长期的泥沙沉积，形成了丰富的湿地和水生生态系统。 再者，长江乙河段的沉积作用同样重要。随着水流速度的减慢，携带的泥沙和其他物质会在河口或河道的下游部分沉积下来。例如，长江口的黄金三角洲就是由于长江携带的泥沙沉积形成的。 最后，长江乙河段的冲刷作用也不可忽视。水流的冲击力会对河岸和河床的岩石和土壤造成破坏，导致河…	回答: 长江乙河段流水作用的主要形式为冲刷作用。这是通过水流对地表物质的冲击和磨蚀来改变地貌的过程。判断依据可以从地图上观察河道两岸的陡崖、悬崖、河漫滩等地貌特征，以及河道中的漩涡、深潭等现象，这些都是冲刷作用的表现。此外，可以观察地图上的河床砾石大小、河水流速等参数来进一步确认冲刷作用的存在。	a	a	a	model_a	model_a	stud_a
西藏地区城镇分布	分析西藏地区城镇主要分布在该区域东南部河谷地区的自然原因（8分）	青藏高原海拔高，热量条件不足；东南部地区纬度较低，热量条件较好，降水适宜；海拔较低且地形封闭的河谷地区，热量条件较好；河谷地区，靠近河流，便于取水；河谷地区地形相对平坦，土壤肥沃。	城镇主要分布在西藏地区东南部河谷地区的自然原因有以下几点：首先，该地区水资源充沛，便于日常用水；其次，临近河流，便于发展农耕和种植水稻；第三，能提高灌溉技术，增加粮食产量；第四，河流资源丰富，能改善伙食；第五，临近河道有利于城镇的兴起；最后，运输方便，为城镇发展提供便利条件。	西藏地势高，降水少，因此人口主要分布在河流附近。西北地区干旱且风沙大，不适合人口居住。东南地区降水相对较多，同时山脉多，能够阻挡水汽形成降水，进而形成河谷，这也是城镇主要分布在该区域东南部河谷地区的自然原因。	b	stud_a	西藏地区的城镇主要分布在东南部的河谷地区，这主要受到了该地区的地理环境和自然条件的影响。以下是几个主要的自然原因： 1. 气候条件：西藏东南部的河谷地区气候较为温和，相比西藏其他地区更为适宜人类居住和农业生产。这里的气候湿润，降水充足，适合种植多种作物，尤其是谷物和水果，这为城镇的建立和发展提供了物质基础。 2. 水资源：西藏东南部河谷地区拥有丰富的河流和湖泊，这些水资源为城镇提供了必需的生活用水和农业灌溉水源。例如，雅鲁藏布江及其支流为该地区提供了大量的水资源，支持了当地的农业和城市发展。 3. 土地条件：河谷地区的土地平坦，适合建设和农业耕作。相比于西藏其他地区的高山和峡谷地形，这里的土地更易于开发和利用，适合城镇的扩张和发展。 4. 生态环境：西藏东南部河谷地区的生态环境相对较为稳定，适宜人类居住。这里的生态环境有助于维持城镇居民的健康，同时也为城镇的经济发展提供了良好的外部条件。…	西藏地区城镇主要分布在该区域东南部河谷地区的自然原因主要包括以下几点： 1. 地理条件：东南部河谷地区地势较为平坦，便于城镇的建设和交通发展。相比较其他地区的高山峻岭，河谷地区更适合人类居住和生活。 2. 水资源丰富：东南部河谷地区水资源比较丰富，有利于农业生产和城镇发展。例如，雅鲁藏布江、怒江、澜沧江等河流为当地提供了充足的灌溉水源和生活用水。 3. 气候条件：东南部河谷地区气候相对温和，四季分明，适宜农作物种植和人类居住。这种气候条件也吸引了人们在此定居，从而形成了城镇聚集。 4. 经济发展需求：东南部河谷地区交通便利，有利于商业贸易的发展。同时，该地区也是西藏地区的经济中心，集聚了大量的人口和资源，城镇的建设也是为了适应经济发展的需求。 举例来说，拉萨是西藏地区最大的城镇之一，位于拉萨河谷地区，正是因为以上所述的自然原因，才使得拉萨成为了西藏地区政治、经济、文化中心。	tie	b	b	tie	model_a	model_b
阅读图文材料，完成下列要求。贵州水城天生桥(由瀑流沿山谷裂隙冲蚀而成)景区位于六盘水的干河流域,境内喀斯特地貌广泛发育。水城天生桥为世界最高的可行驶汽车的公路天生桥,是河道洞穴坍塌后残留洞段，具有重要的研究价值。	简述喀斯特地貌广布对当地地理环境的影响。	有利影响包括喀斯特地貌景观独特，是良好的旅游资源，有利于发展旅游业；地下水资源丰富。不利影响包括地表崎岖，地质条件复杂，不利于交通建设；交通不便，不利于对外经济文化交流；岩层不稳定，不利于水利工程建设；耕地面积小且分散，土层薄，不利于发展农业；岩石裂隙发育，地表水资源短缺；保水性差，易造成水土流失；岩石裸露，易出现石漠化现象；生态环境脆弱。	对于喀斯特地貌广布对当地地理环境的影响，有利的方面包括：首先，喀斯特地貌适合重大工程选址；其次，地势奇特，拥有丰富的旅游资源；第三，喀斯特地区地下水资源丰富。然而，不利的方面也存在：首先，地表蓄水能力较差，地表水资源匮乏；其次，地势复杂，交通不便；第三，土壤浅薄贫瘠，不利于农业生产。	喀斯特地貌广布对当地地理环境的影响是多方面的。首先，喀斯特地貌的广布为当地带来了重要的旅游业发展机遇，吸引了大量游客前来观光。其次，喀斯特地貌的存在促进了地下岩溶洞穴的形成，有利于地下水资源的开发利用。此外，喀斯特地貌的分布也为重大工程的开发提供了便利条件。 然而，喀斯特地貌的广布也带来了一些不利因素。首先，地形崎岖的喀斯特地貌使交通不便利，给当地的交通运输带来了一定的困难。其次，由于喀斯特地貌区域的不平衡性，导致了一些地区的发展程度较低，不利于全面开发利用资源。	a	stud_b	喀斯特地貌广布对当地地理环境产生了深远的影响。喀斯特地貌是由溶岩和洞穴系统形成的，通常在含碳酸盐的岩石地区发展。这种地貌的特点是岩石被溶解，形成了独特的景观，如溶洞、峡谷、悬崖和天生桥等。 在贵州水城天生桥的例子中，喀斯特地貌的形成是由于河流沿山谷裂隙冲蚀而成的天生桥。这种地貌的形成过程通常涉及到长时间的水流侵蚀，导致岩石被溶解，形成了现有的天生桥结构。 喀斯特地貌的广布对当地地理环境的影响包括： 1. 地形变化：喀斯特地貌的形成导致了地表的显著变化，形成了独特的景观，如天生桥、溶洞等，这些景观不仅丰富了当地的地理多样性，也为当地的旅游业提供了丰富的资源。 2. 水文特征：喀斯特地貌地区的水文特征通常是复杂的。溶洞和地下水道的存在会影响地表水的流向和流量，可能导致季节性洪水和干旱。 3. 生态系统：喀斯特地貌的生态系统通常是多样化的，溶洞内的微环境支持独特的生物群落，而地表上的喀斯特地貌…	喀斯特地貌广布对当地地理环境的影响主要表现在以下几个方面： 1. 地下水资源丰富：喀斯特地貌中的溶洞、地下河等地下水系统丰富，为当地提供了丰富的地下水资源，满足了人们的日常生活用水需求。 2. 地表水资源丰富：喀斯特地貌中的地表水系统发育，包括河流、湖泊等水体，为植被生长和动物生存提供了必要的水源。 3. 生态环境保护：喀斯特地貌中的溶洞、地下河等特殊地质景观成为了生物多样性的重要栖息地，对当地的生态环境保护起到了积极的作用。 4. 旅游资源丰富：喀斯特地貌中的地下溶洞、天生桥等景观吸引了大量游客前来观赏，促进了当地旅游业的发展，带动了当地经济的增长。 5. 地质灾害风险：喀斯特地貌中容易发生地质灾害，如地下水溶蚀导致地表塌陷、溶洞坍塌等现象，对当地的基础设施和居民安全构成一定的风险。 综上所述，喀斯特地貌广布对当地地理环境既带来了丰富的资源和旅游机会，同时也需要加强对地质灾害的防范和治…	b	a	a	model_b	model_a	model_b
冰川泥石流是由冰雪融水或冰湖渍决冲蚀形成的含有大量泥砂石块的特殊洪流，其形成的堆积体常对河道产生影响。藏东南帕隆藏布江流域是我国冰川泥石流的多发地区,随着气温升高,该流域冰川泥石流发生的频率增加。	分析气温升高对帕隆藏布江流域冰川泥石流发生频率增加的影响	气温升高，冰雪融化，冰债物出露，松散物质增多；冰雪融水量增多，冰湖更易渍决；地表径流量增加，侵蚀和搬运能力增强。	气温升高会导致冰川融化速度加快，进而增加泥石流发生的频率。这是因为冰川融化后的水与冰中的杂质混合形成含有大量泥砂石块的特殊流体，会向河沟冲刷而去。	气温升高导致冰川融化加剧，进而增加了冰川泥石流的频率。这种现象会影响帕隆藏布江流域的河流，给当地居民带来诸多不便。	tie	stud_a	气温升高对帕隆藏布江流域冰川泥石流发生频率的增加主要体现在以下几个方面： 1. 冰川融化加速：随着气温的升高，冰川的融化速度加快，导致冰川下方的冰雪融水增加，这是冰川泥石流的主要水源之一。融水会侵蚀冰川表面，形成冰川下方的水库，即冰湖。这些冰湖的水量随着融水的不断补给而增加，当冰湖的水量超过冰湖的容量时，冰湖就会溃决，形成泥石流。 2. 冰湖数量和规模的增加：气温升高不仅加速了冰川的融化，还促进了冰湖的形成和扩大。随着冰湖数量和规模的增加，溃决的概率也随之提高，这进一步增加了冰川泥石流的发生频率。 3. 冰川体积的减少：长期的气温升高导致冰川体积的逐渐减少，冰川的稳定性下降，增加了冰川泥石流的发生风险。随着冰川体积的减少，冰川的坡度也可能变得更陡，这会加速泥石流的流速和携带能力。 4. 极端天气事件的增加：气温升高可能导致极端天气事件的频率增加，如强降雨、干旱等，这些极端天气事件可以进一…	气温升高会导致冰川融化加速，增加了冰川泥石流的形成可能性。首先，气温升高会导致冰川融化的速度加快，使得冰川内部的水量增加，增加了冰川崩塌的风险。其次，融化的冰水会增加冰川的滑移速度，从而增加了冰川泥石流的流动速度和规模。另外，气温升高还可能导致冰湖融冰加剧，进一步增加泥石流的形成。因此，气温升高对帕隆藏布江流域冰川泥石流发生频率增加产生了明显的影响。 举例来说，随着气温升高，帕隆藏布江流域的冰川融化速度加快，2015年就曾发生过一次规模较大的冰川泥石流灾害，造成了严重的人员伤亡和财产损失。 。	b	tie	b	model_b	model_a	model_b
玉米油是利用玉米胚芽生产的一种谷物油脂,营养丰富,口味清香。玉米油生产流程由毛油提取和毛油精炼等环节构成,胚芽的毛油提取率为40%,由毛油到精炼油的转化率为90%。山东邹平某公司通辽铁岭是我国建设最早、目前規模最大的玉米油鄂尔多斯惠民产品研发和生产企业,其玉米油销售量邹平占国内市场的50%。该公司在山东惠民辽宁铁岭、内蒙古通辽和鄂尔多斯建有毛油压榨工厂,在公司本部、浙江杭州广东广州建有精炼油和小包装产品生产基地,将毛油运输至精炼油生产基地多使用集装箱液袋(一次性使用的储存和运输各种非危险液体货物的软体包装容器),使用罐箱或铁桶运输则越来越少。杭州公司总部广州毛油压榨工厂精炼油和小包装产品生产基地	简述惠民、铁岭、通辽、鄂尔多斯等地吸引该公司建设毛油压榨工厂的优势条件。	为玉米主产区，原料丰富；皆为欠发达中小城市，地价便宜，劳动力丰富且价格低。	简述惠民、铁岭、通辽、鄂尔多斯等地吸引该公司建设毛油压榨工厂的优势条件包括：该地拥有丰富的原料产地，拥有系统的压榨技术，有充足的劳动力资源，地价较为实惠。	简述惠民、铁岭、通辽、鄂尔多斯等地吸引该公司建设毛油压榨工厂的优势条件如下： 这些地区拥有充足的原材料，市场广阔，交通便利，同时还具备先进的科学技术。	a	stud_a	该公司在惠民、铁岭、通辽、鄂尔多斯等地建设毛油压榨工厂的优势条件主要包括以下几点： 1. 地理位置：这些地区都位于中国东北和华北地区，这些地区是中国主要的玉米产区，拥有丰富的玉米资源，确保了玉米油生产的原料供应稳定。 2. 政策支持：中国政府鼓励发展农业产业化和农产品深加工，特别是在东北地区，政府出台了一系列政策支持农业转型升级，包括税收优惠、资金支持等，这些政策为公司的投资提供了有利的环境。 3. 交通便利：这些地区的交通网络发达，拥有铁路、公路等多种运输方式，能够便捷地将玉米运输到工厂，并将生产的毛油运输到精炼油生产基地，这有助于降低运输成本和提高物流效率。 4. 人才资源：这些地区拥有丰富的农业技术人才和工人资源，能够满足公司的生产需求，同时也能够支持公司的技术创新和产品研发。 5. 经济发展潜力：这些地区的经济发展潜力较大，公司在这些地区的投资不仅能够获得较高的回报，还能够促进当…	在惠民、铁岭、通辽、鄂尔多斯等地吸引该公司建设毛油压榨工厂的优势条件包括： 1. 地理位置优势：这些地区靠近玉米生产基地，便于获取原料并降低运输成本。 2. 政策支持：当地政府可能提供税收优惠、土地优惠等政策支持，吸引企业投资建厂。 3. 人力资源：这些地区可能有丰富的劳动力资源，便于企业招聘和管理员工。 4. 基础设施完善：这些地区可能有良好的交通、通讯等基础设施，有利于企业生产和运营。 5. 市场需求：这些地区可能有较大的市场需求，有利于企业销售产品并扩大市场份额。 举例来说，鄂尔多斯是内蒙古自治区的重要产粮区，玉米种植面积大，为该公司提供了丰富的原料资源；通辽是东北地区的经济中心，地理位置优越，交通便利，有利于企业的物流运输。这些优势条件使得这些地区成为该公司建设毛油压榨工厂的理想选择。 .	a	a	a	tie	stud_a	stud_a
玉米油是利用玉米胚芽生产的一种谷物油脂,营养丰富,口味清香。玉米油生产流程由毛油提取和毛油精炼等环节构成,胚芽的毛油提取率为40%,由毛油到精炼油的转化率为90%。山东邹平某公司通辽铁岭是我国建设最早、目前規模最大的玉米油鄂尔多斯惠民产品研发和生产企业,其玉米油销售量邹平占国内市场的50%。该公司在山东惠民辽宁铁岭、内蒙古通辽和鄂尔多斯建有毛油压榨工厂,在公司本部、浙江杭州广东广州建有精炼油和小包装产品生产基地,将毛油运输至精炼油生产基地多使用集装箱液袋(一次性使用的储存和运输各种非危险液体货物的软体包装容器),使用罐箱或铁桶运输则越来越少。杭州公司总部广州毛油压榨工厂精炼油和小包装产品生产基地	推测并解释将毛油由铁岭运输到广州精炼油生产基地的合理交通方式,指出使用集装箱液袋运输相对于使用铁桶运输的优势。(8分)	合理交通方式为陆海联运；因为长距离海运费用较低，节约运输成本。相比铁桶运输，使用集装箱液袋运输转运方便，只需单程运输，节约运输费用；液袋可充分利用集装箱的空间，装载量大（具有规模运输优势）。	将毛油由铁岭运输到广州精炼油生产基地，水路运输是一个合理的选择。水路运输沿海滨城市，能够承载更多的货物，从而节约运输成本。相比于铁桶运输，使用集装箱液袋运输有更多优势。集装箱液袋能够节约集装空间，装载更多的毛油，同时也更安全、高效，节省装载时间。此外，集装箱液袋方便处理和卸货，为运输过程提供了便利。	推测并解释将毛油由铁岭运输到广州精炼油生产基地的合理交通方式是铁路运输。相对于使用铁桶运输，使用集装箱液袋运输有以下优势：①集装箱液袋制作便利；②原料成本较低；③运输质量高，不与外界发生反应；④运输体积利用率更高。	a	stud_b	将毛油由铁岭运输到广州精炼油生产基地的合理交通方式主要有以下几种： 1. 铁路运输：由于毛油的体积较大，重量相对较重，铁路运输可以节省燃油成本，并且运输速度较快，适合长距离运输。 2. 海上运输：如果从铁岭到广州的距离较远，海上运输可能是更经济的选择。可以通过集装箱货轮将毛油运输到沿海的港口，然后再转运至广州。 3. 道路运输：如果距离较近，或者需要快速响应市场需求，可以选择公路运输。现代公路运输设施较为完善，尤其是使用集装箱液袋的方式，可以方便快捷地完成运输任务。 使用集装箱液袋运输相对于使用铁桶运输的优势主要体现在以下几个方面： - 危险性降低：集装箱液袋是一种一次性使用的容器，避免了铁桶可能存在的泄漏和腐蚀问题，提高了运输的安全性。 - 易于处理：集装箱液袋在运输完成后可以直接丢弃，不需要像铁桶那样进行清洗和回收处理，节省了后期的处理成本和时间。 - 易于堆叠：集装箱液袋可以方便地…	推测将毛油由铁岭运输到广州精炼油生产基地的合理交通方式可能是通过铁路运输。铁路运输相对于公路运输更为经济、环保且效率更高，因为铁路运输可以一次性运输大量的货物，减少了运输成本和时间。同时，铁路运输也更为稳定和安全，能够保证毛油的质量不受损失。 使用集装箱液袋运输相对于使用铁桶运输的优势在于： 1. 成本更低：集装箱液袋是一次性使用的软体包装容器，相比起铁桶，集装箱液袋的成本更低，可以降低包装费用。 2. 环保更好：集装箱液袋可以重复利用，减少了废弃物的产生，符合现代环保理念。 3. 运输效率更高：集装箱液袋可以一次性装载更多的货物，减少了装卸货物的次数，提高了运输效率。	tie	a	a	model_b	stud_a	model_b
埃及开罗是世界上最拥挤的城市之一,目前拥有约2400万人,预计到2050年将超过4 000 万人。2015 年 3月，埃及政府宣布在开罗以东 45 千米的沙漠空地上建造新首都，面积几乎是开罗的两倍,政府主要通过土地销售来抵消新首都的建设成本。2017年10月11日,中国建筑股份有限公司和埃及住房、公共工程与城市化部签署了埃及新首都商务区项目总承包含同。从2021年12月1日起，新首都开始为期6个月的“试运营”。下图示意埃及新首都地理位置及周边地区。	说明埃及政府建设新首都的主要目的。	缓解开罗人口增长的压力；缓解开罗的“大城市病”问题；创造就业；拉动埃及的经济发展；提高土地利用率等。	①减轻人口拥挤问题②扩大城市面积，发展经济③提高城市职能，促进政治等行业发展.④合理占用沙漠，节约国家土地发理配置	新首都建设的主要目的包括缓解人口压力、带动当地经济发展、促进国际交流、开发利用土地资源以及加强军事防御。	b	tie	埃及政府建设新首都的主要目的在于解决开罗城市过度拥挤和发展压力的问题。随着人口的快速增长，开罗面临着严重的住房短缺、交通拥堵、基础设施过载等一系列城市化挑战。新首都的建设旨在为埃及提供一个更加有序、可持续的发展空间，缓解开罗的压力，并为未来人口的增长提供足够的空间。 此外，新首都的建设还旨在促进经济发展，特别是在服务业和商业领域。通过土地销售来抵消建设成本的做法，实际上是利用土地资源来吸引投资和促进经济增长。新首都商务区项目的签署，尤其是中国建筑股份有限公司的参与，进一步体现了这一目标。 最后，试运营阶段的启动是为了测试新首都的基础设施和服务系统，确保在正式运营前能够顺利运行，并为未来的发展提供经验和数据支持。	埃及政府建设新首都的主要目的是为了缓解开罗市的人口过度集中和交通拥堵问题。随着人口增长和城市化进程加速，开罗的基础设施已经无法满足日益增长的人口需求，导致城市的负担越来越重。因此，建设新首都旨在分流开罗的人口和资源，提升城市整体的生活质量和发展水平。同时，新首都的建设也有助于吸引更多的投资和人才，促进当地经济的繁荣和发展。通过土地销售等方式，政府还可以筹集资金用于新首都的建设，实现城市规划和发展的可持续性。总的来说，建设新首都是为了实现城市可持续发展和提升居民生活品质的长远目标。	a	a	a	model_a	stud_a	stud_a
埃及开罗是世界上最拥挤的城市之一,目前拥有约2400万人,预计到2050年将超过4 000 万人。2015 年 3月，埃及政府宣布在开罗以东 45 千米的沙漠空地上建造新首都，面积几乎是开罗的两倍,政府主要通过土地销售来抵消新首都的建设成本。2017年10月11日,中国建筑股份有限公司和埃及住房、公共工程与城市化部签署了埃及新首都商务区项目总承包含同。从2021年12月1日起，新首都开始为期6个月的“试运营”。下图示意埃及新首都地理位置及周边地区。	简述埃及新首都商务区项目选择由中国企业承包建设的理由。	埃及经济相对落后，技术水平低；中国企业基建经验丰富；“一带一路”倡议，推动中企在埃及发展；中埃关系友好等。	中国企业具有先进的技术和优质的产品，建筑方面经验丰富，拥有充足的资金和材料供应。	选择由中国企业承包建设埃及新首都商务区项目有几个理由。首先，中国技术先进、国力强盛，能够促进商务交流。其次，中埃有着良好的国家往来，这也是对中国表达善意的体现。最后，合作的目的明确，相信中国企业的专业性能够确保项目顺利进行。	a	stud_b	埃及新首都商务区项目选择由中国企业承包建设的理由主要基于以下几个方面： 1. 经验与技术：中国在城市建设和基础设施项目方面拥有丰富的经验和技术。中国企业在全球范围内参与了许多大型城市建设项目，积累了大量的专业知识和成功案例。因此，中国建筑股份有限公司能够为埃及新首都商务区项目提供高效、可靠的建设服务。 2. 经济效益：中国企业在国际市场上通常具有较强的竞争力，能够提供经济合理的建设方案。通过土地销售来抵消建设成本的模式，中国企业可以在项目中实现经济效益，同时帮助埃及政府减轻建设新首都的财政压力。 3. 政治关系：中埃两国在政治和经济上有着良好的合作关系。中国企业在埃及的投资和建设项目往往得到了政府的支持和信任，这有助于项目的顺利进行。 4. 项目规模：新首都商务区的建设规模巨大，需要大量的资金和资源。中国企业具有强大的资金实力和项目管理能力，能够承担如此规模的项目。 5. 国际合作与交流…	埃及新首都商务区项目选择由中国企业承包建设的理由有多方面。首先，中国企业在国际建设领域有着丰富的经验和技术实力，能够保证项目的顺利进行和高质量的建设。其次，中国企业参与建设可以提高项目的效率和速度，有助于在规定时间内完成项目，满足埃及政府对新首都的紧迫需求。此外，中国企业在建设过程中还可以为埃及提供技术支持和培训，有助于提升当地的建设能力和水平。最后，中国企业参与建设也有助于推动中埃两国在经济和贸易领域的合作，加强双方的友好关系。。	tie	b	b	tie	model_a	model_b
湛江东海岛位于雷州半岛东侧,降水集中在5~10月,夏季盛行偏东风,冬季盛行偏北风。该岛东海岸发育有近20 km的砂质海滩,海滩后缘为几道高大的海岸沙堤,沙堤东部生长着优良的海边固沙植物-老鼠书,老鼠节草丛沙堆(是沙粒在风力作用下遇到草丛阻拦后堆积形成的一种典型地貌,形态多为蝌蚪形和锥形)分布集中。下图示意东海岛地理位置和海滩草丛沙堆分布。	分析东海岛草丛沙堆形成的有利条件。	冬夏季节风力大，风力搬运作用强；夏季盛行偏东风，冬季盛行偏北风，风向常年稳定少变；海滩面积广，为沙堆发育提供沙源；海岸生长着草丛沙生植物，起到减风、固沙作用，有利于沙堆的形成等。	1. 东海岛位于海边，海风强劲。 2. 该岛位于砂质海滩，沙粒丰富。 3. 草丛在这里生长茂盛。 4. 东海岛受季风影响，冬季偏北风盛行，与草丛方向大致相同，有利于草丛沙堆的形成。	有利于草丛沙堆形成的条件包括：保护植物根部、增加昼夜温差、减少植物水分蒸发、固定植被、保温和挡风。	a	stud_a	东海岛草丛沙堆的形成受到了该地区的气候、地理和风力条件的共同影响。首先，夏季盛行偏东风为草丛沙堆的形成提供了有利的风力条件。这种风向能够将海风带来的沙粒吹向海岸线，特别是在海滩后缘的高大的海岸沙堤处，沙粒的堆积更加集中。 其次，冬季盛行偏北风也对草丛沙堆的形成起到了推动作用。冬季的北风能够进一步加强沙粒的堆积，尤其是在老鼠书和老鼠节草丛的阻挡下，沙粒在这些植物的保护下形成了稳定的沙堆。 此外，降水集中在5~10月的季节性特征也对草丛沙堆的形成有积极影响。夏季和秋季的降水能够保持沙堆的湿润状态，增强其稳定性，同时也为植物的生长提供了足够的水分，促进了固沙植物的生长和沙堆的形成。 综上所述，东海岛草丛沙堆的形成得益于该地区的气候条件、风力条件以及地理特征。这些条件共同作用，促进了沙粒的堆积和固沙植物的生长，形成了独特的蝌蚪形和锥形的草丛沙堆地貌。	草丛沙堆的形成受到多个有利条件的影响。首先，海滩后缘的高大海岸沙堤为草丛提供了一个相对稳定的生长环境，阻挡了海风的侵蚀，使得草丛得以长时间生长并固定沙丘。其次，东海岛夏季盛行偏东风，这种风向有利于将沙粒吹向沙堤，进一步增加沙堆的高度和规模。此外，老鼠书和老鼠节草是优良的海边固沙植物，它们的根系能够有效地固定沙土，防止沙丘被风吹散。因此，东海岛的地理位置、气候条件以及植被种类都为草丛沙堆的形成提供了有利条件。 举例来说，类似于东海岛地理位置的其他海岛或沿海地区，如果具有相似的高大海岸沙堤、适宜的气候风向和固沙植被，也有可能形成类似的草丛沙堆。这些有利条件共同作用，促使了草丛沙堆在东海岛这一地区的形成和发展。 。	b	b	b	model_a	model_a	stud_a
湛江东海岛位于雷州半岛东侧,降水集中在5~10月,夏季盛行偏东风,冬季盛行偏北风。该岛东海岸发育有近20 km的砂质海滩,海滩后缘为几道高大的海岸沙堤,沙堤东部生长着优良的海边固沙植物-老鼠书,老鼠节草丛沙堆(是沙粒在风力作用下遇到草丛阻拦后堆积形成的一种典型地貌,形态多为蝌蚪形和锥形)分布集中。下图示意东海岛地理位置和海滩草丛沙堆分布。	指出蝌蚪形老鼠节沙堆与锥形老鼠节沙堆形成的先后顺序，并说明理由。	先形成蝌蚪形老鼠艻沙堆，后形成锥形老鼠苏沙堆。理由：发育初期的老鼠艻以匍匐生长为主，风沙沿下风向在植被后方拖出细长的尾巴，形成蝌蚪形老鼠芳沙堆；老鼠芳继续生长，形成草丛，拦截沙物质使沙堆不断增高，形成锥形老鼠艻沙堆。	先形成蝌蚪形老鼠节沙堆，后形成锥形老鼠节沙堆。蝌蚪形老鼠节沙堆比较矮，容易形成，而沙粒在风力作用下遇到草丛阻力后会先形成较长的蝌蚪形。而锥形老鼠节沙堆堆积的时间较长，且比较高。	锥形老鼠堆形成的先后顺序是：④位纬度低，易于形成；③山脉阻挡，位于迎风坡；②位临海洋，海洋风吹；①吹东南风，易于锥形老鼠节沙堆的形成。因为纬度低会使气温较高，有利于形成锥形老鼠堆；山脉会阻挡风向，使得锥形老鼠堆位于迎风坡；临海洋的地区受海洋风影响，有利于形成锥形老鼠堆；而东南风的吹拂也会促进锥形老鼠堆的形成。	a	stud_a	蝌蚪形老鼠节沙堆通常在锥形老鼠节沙堆形成之前。这种顺序的形成可以从风力作用的角度来解释。风力在海滩上移动沙粒，形成沙堆。锥形沙堆是最稳定的形态，因为它的底部较大，能够更好地抵御风力侵蚀。因此，锥形沙堆往往是第一个形成的，因为它们能够更快地达到稳定状态。 蝌蚪形沙堆则是随后形成的，它们通常在锥形沙堆周围形成。蝌蚪形沙堆的形成可能是因为风力在锥形沙堆的保护下，继续在周围的草丛和沙地上堆积沙粒。由于蝌蚪形沙堆的形态较为不稳定，它们更容易受到风力侵蚀和重塑，形成类似蝌蚪的形状。 总的来说，锥形老鼠节沙堆在风力作用下先形成，因为它们是最稳定的形态，而蝌蚪形老鼠节沙堆则是在锥形沙堆的保护下，随后在风力作用下形成的不稳定形态。	蝌蚪形老鼠节沙堆是在锥形老鼠节沙堆之后形成的。这是因为在海滩上，风力作用下的沙粒会被海边固沙植物-老鼠书阻拦，形成老鼠节草丛沙堆。由于风的方向是夏季盛行偏东风，老鼠书生长在沙堤东部，所以在风力作用下，沙粒会首先被阻拦在老鼠书的位置，形成蝌蚪形老鼠节沙堆。而在蝌蚪形老鼠节沙堆的后方，沙粒继续受到风力作用，堆积在老鼠书的后方形成锥形老鼠节沙堆。	b	a	tie	model_a	model_a	stud_a
太行山是我国重要的地理分界线,绵延400多千米,大部分海拔在1200米以上,因此该山地对周边地理环境有较大的影响。太行山是我国重要的地理分界线,绵延400多千米,大部分海拔在1200米以上,因此该山地对周边地理环境有较大的影响。太行山脉东侧为断层构造，相对高差达 1500～2 000 米，山前发育典型的洪积扇和冲洪积平原。	简述太行山东侧山前发育的典型洪积扇与洪积平原的形成过程。	太行山对黄土高原形成的影响：黄土高原的黄土主要受强盛西北风的搬运作用，从西北内陆吹向东部，由于高大的太行山呈东北一西南走向，对西北风有明显的阻挡作用，大量黄土因风力减弱便堆积在太行山西侧构成黄土高原。太行山对黄土高原分布的影响：由于太行山的阻挡使得黄土不能越过高山，黄土高原仅分布在太行山西侧。	太行山东侧山前发育的典型洪积扇与洪积平原的形成过程主要是由于阻挡了海南季风的水汽，黄土被西北季风吹向东部平原，有利于黄土高原黄土的堆积。同时，阻挡了东南季风的水汽，形成黄土高原干旱少雨的气候，减少黄河水流冲刷流失的情况。	太行山东侧山前发育的典型洪积扇与洪积平原的形成过程可简述为：太行山对从河西走廊吹来的西北风起阻碍挡作用，风中大量沙土下沉，日积朦累，形成了黄土高原。由于太行山为南北走向，黄土高原也是在太行山西侧沿太行山的走向形成的。	b	stud_b	太行山东侧山前形成的典型洪积扇和冲洪积平原是由于山体的侵蚀作用和河流的沉积作用共同作用的结果。洪积扇是由河流在山前平缓的地区沉积大量的泥沙和岩石碎屑形成的扇形地形。这些沉积物主要来自于太行山脉的侵蚀，包括山体的风化、滑坡和径流侵蚀等。 洪积扇的形成过程可以分为以下几个阶段： 1. 太行山脉的侵蚀：山体的风化和径流侵蚀不断地将岩石和土壤侵蚀下来，形成大量的泥沙和碎屑物。 2. 河流的运输：这些泥沙和碎屑物被河流运输到山前平缓的地区。 3. 河流的沉积：当河流到达山前平缓的地区时，由于水流速度减慢，泥沙和碎屑物开始沉积。 4. 形成洪积扇：随着时间的推移，河流的沉积物逐渐积累，形成了一个扇形的地形，这就是洪积扇。 冲洪积平原是洪积扇的进一步发展和演变，它是由河流冲刷和洪水冲积形成的平坦地带。冲洪积平原的形成过程通常包括以下几个阶段： 1. 洪水的冲刷：频繁的洪水会对洪积扇进行冲刷，清除部分沉…	洪积扇是指由河流在山脚下堆积而成的三角形扇形地带，是由于河流在山脚下流速减慢而携带的泥沙沉积在此处形成的。在太行山东侧，由于山脉相对高差大，河流在山脚下受到阻碍流速减慢，沉积物沉积在此处形成了典型的洪积扇。而洪积平原是指在洪水时期河流冲刷出来的平坦河床，由于太行山地形复杂，洪水在山脚下冲刷出来的河床形成了冲洪积平原。这些洪积扇和冲洪积平原的形成过程都是由于太行山地形对河流流速和沉积物携带的影响而形成的。。	tie	tie	tie	model_a	model_a	model_b
太行山是我国重要的地理分界线,绵延400多千米,大部分海拔在1200米以上,因此该山地对周边地理环境有较大的影响。太行山是我国重要的地理分界线,绵延400多千米,大部分海拔在1200米以上,因此该山地对周边地理环境有较大的影响。太行山脉东侧为断层构造，相对高差达 1500～2 000 米，山前发育典型的洪积扇和冲洪积平原。	简述太行山东侧山前发育的典型洪积扇与洪积平原的形成过程。	太行山区地形崎岖，山区的洪流携带大量泥沙流出太行山东侧山口处，因地势变缓，流速降低，水流搬运能力减弱，河水挟带的泥沙便大量堆积形成洪积扇，多个洪积扇相连形成了洪积平原。	太行山东侧山前发育的典型洪积扇与洪积平原的形成过程是这样的：黄河水中含有大量泥沙，当泥沙沉积时，就形成了广阔的洪积平原。而太行山东部地势较为陡峭，是迎风坡，容易形成地形雨，降水形成河流，流水不断侵蚀，最终形成了壮观的洪积扇。	该地处于黄河经过的地区，属于温带季风气候。在7-8月份，降水集中且充沛，导致大量黄土随着黄河流向下游。到了太行山东侧部分，地势逐渐变得平坦广阔，河流流速减缓。由于河流携带泥沙能力减弱，流失的黄土在太行山东侧部分开始沉积。经过长期的沉积和冲刷，最终形成了典型的洪积扇和洪积平原。	b	stud_b	太行山东侧山前形成的典型洪积扇和冲洪积平原是由于山体的侵蚀作用和河流的沉积作用共同作用的结果。洪积扇是由河流在山前平缓的地区沉积大量的泥沙和岩石碎屑形成的扇形地形。这些沉积物主要来自于太行山脉的侵蚀，包括山体的风化、滑坡和径流侵蚀等。 洪积扇的形成过程可以分为以下几个阶段： 1. 太行山脉的侵蚀：山体的风化和径流侵蚀不断地将岩石和土壤侵蚀下来，形成大量的泥沙和碎屑物。 2. 河流的运输：这些泥沙和碎屑物被河流运输到山前平缓的地区。 3. 河流的沉积：当河流到达山前平缓的地区时，由于水流速度减慢，泥沙和碎屑物开始沉积。 4. 形成洪积扇：随着时间的推移，河流的沉积物逐渐积累，形成了一个扇形的地形，这就是洪积扇。 冲洪积平原是洪积扇的进一步发展和演变，它是由河流冲刷和洪水冲积形成的平坦地带。冲洪积平原的形成过程通常包括以下几个阶段： 1. 洪水的冲刷：频繁的洪水会对洪积扇进行冲刷，清除部分沉…	太行山东侧山前发育的典型洪积扇与洪积平原的形成过程主要是由于山地的断层构造和地质作用导致的。当山地发生地震或者其他地质活动时，山体内的岩石会破碎并经过风化、侵蚀等过程，形成大量的碎石、泥沙等物质。这些物质随着重力和水流的作用，沿着山坡向下流动，并在山脚堆积形成洪积扇。而在洪水等自然灾害的影响下，洪积扇上的泥沙会被冲刷到山脚下，逐渐形成平坦的洪积平原。 举例来说，太行山东侧的黄河流域就是一个典型的洪积扇和洪积平原地区。黄河在太行山脉东侧冲积出大量的泥沙，形成了宽阔的洪积平原，对周边地理环境产生了重要影响。 。	a	b	a	model_a	model_a	model_b
2020 年，某科考队考察了内蒙古自治区阿拉善沙漠世界地质公园内的“大漠天池”。队员们爬到沙山高处，看到小溪上游被 180米长的黄沙阻断，上游方向则变成了一汪碧绿的深潭,深潭两侧是异常陡峻的发育有大量裂隙的花岗岩崖壁。夹在巴丹吉林沙漠和花岗岩岩体之间这一狭长幽深的潭水即是大漠天池.天池全长300米,宽60米,最大水深近10米,水位季节变化小,湖面海拔高约1 365米,与紧邻其下的湿地间有15米的高差,与附近地势最低的一个盐湖的高差达 175 米。	简析“大漠天池”的形成过程。	溪流上游，落差大，流速快，侵蚀作用强，下切形成狭长谷地；受风沙活动影响，沙丘阻塞河道而形成堰塞湖。	由于黄沙的阻隔，原本的水流被迫停滞，不断的侵蚀着周围的地形。随着时间的推移，水流不断地汇聚，最终形成了壮丽的大漠天池。	由于软流层岩浆向上侵入地层，受板块生长运动的水作用，岩石发生断裂形成深潭坑。随后，小溪的水流入深坑，但由于黄沙的阻断，水流无法顺利流出，导致小溪的水源不断地流入深坑，最终形成了深潭，也就是我们所称的“大漠天池”。	b	stud_b	"大漠天池"的形成是一个复杂的自然地质过程，涉及到地质结构、气候变化、水文循环等多个因素。以下是简析其形成过程的几个关键步骤： 1. 地质结构背景："大漠天池"位于内蒙古自治区阿拉善沙漠世界地质公园，这一地区地质结构复杂，包含了古老的花岗岩岩体。这些岩体在数亿年前形成，随后经历了长期的风化和侵蚀，形成了陡峭的崖壁。 2. 气候变化：阿拉善沙漠地区的气候主要是干旱的，降水量很少。然而，历史上可能存在过更为湿润的气候条件，这可能导致当地的水文循环更加活跃，形成了河流和溪流。 3. 水文阻断：随着气候的变化，可能出现了干旱期，导致溪流干涸。然而，在某个时刻，180米长的黄沙可能被风暴或其他自然事件阻断，形成了一个天然的水库。 4. 水库形成：当溪流上游被黄沙阻断时，上游的水流被迫汇聚在这个新的水库中，形成了"大漠天池"。由于水库的水位较高，周围的花岗岩崖壁和沙漠环境形成了一个独特的景观。 5.…	大漠天池的形成过程可能与地质构造、气候变化等多种因素有关。首先，裂隙发育的花岗岩崖壁可能是由于地壳运动造成的地质构造活动，形成了崖壁陡峭的地形。其次，随着气候的变化，可能曾经有过大量的降水，使得潭水形成。由于大漠天池位于两个不同高度的地形之间，可能存在地形梯度，导致了水体的高差。此外，可能大漠天池周围地势低洼，使得大漠天池成为了一个自然的水体集水区。综合以上因素，大漠天池的形成可能是多种地质、气候等因素综合作用的结果。	a	b	tie	model_a	model_a	stud_a
2020 年，某科考队考察了内蒙古自治区阿拉善沙漠世界地质公园内的“大漠天池”。队员们爬到沙山高处，看到小溪上游被 180米长的黄沙阻断，上游方向则变成了一汪碧绿的深潭,深潭两侧是异常陡峻的发育有大量裂隙的花岗岩崖壁。夹在巴丹吉林沙漠和花岗岩岩体之间这一狭长幽深的潭水即是大漠天池.天池全长300米,宽60米,最大水深近10米,水位季节变化小,湖面海拔高约1 365米,与紧邻其下的湿地间有15米的高差,与附近地势最低的一个盐湖的高差达 175 米。	指出“大漠天池”水源的主要补给类型，并说明判断理由。	补给类型为地下水。理由：该地气候干旱，降水少；花岗岩岩体裂隙发育，利于地下水出露；地下水补给稳定，水位季节变化小。	大漠天池的主要补给类型为高山冰雪崩水。这是因为天池的水位季节变化很小，湖面海拔高约1365米，深居内陆，远离海洋，降水稀少。因此，高山冰雪崩水是该天池水源的主要补给类型。	主要补给类型为地下水补给。根据判断理由，大漠天池所处干旱区降水量少，海拔不高，周围没有江河湖海，水位季节变化小，因此推断水源主要来自地下水。	b	stud_b	"大漠天池"的水源主要补给类型是地下水。判断理由如下： 首先，根据描述，天池位于内蒙古自治区阿拉善沙漠世界地质公园内，周围是巴丹吉林沙漠和花岗岩岩体，这是一个典型的沙漠环境，降水量通常较少，表层水资源相对稀缺。因此，表层径流补给天池的可能性较小。 其次，天池水位季节变化小，这表明水量相对稳定，不太受外部径流影响。地下水的补给通常具有较好的稳定性，因为它不受表面径流的直接影响。 再者，天池周围有异常陡峻的花岗岩崖壁，这种地质结构往往与地下水流动有关。花岗岩是一种良好的透水层，能够促进地下水的流动和积聚。 最后，天池与紧邻其下的湿地间有15米的高差，且与附近地势最低的一个盐湖的高差达175米，这些地形特征也支持地下水向天池汇聚的观点。 综上所述，考虑到沙漠环境的特点、水位稳定性、地质结构以及地形高差，推断"大漠天池"的水源主要是地下水补给。	"大漠天池"的水源主要补给类型是地下水补给。这是因为大漠天池位于沙漠和花岗岩岩体之间，周围地势高差较大，且在潭水附近没有明显的入流河流或溪流。同时，天池水位季节变化小，湖面海拔高，这表明水源来自深层地下水层，稳定供给着天池的水量。另外，附近地势最低的盐湖高差达175米，说明盐湖水位较低，不太可能是大漠天池的主要补给源。因此，可以判断大漠天池的主要补给类型为地下水补给。 。	a	b	b	model_a	model_a	model_b
2020 年，某科考队考察了内蒙古自治区阿拉善沙漠世界地质公园内的“大漠天池”。队员们爬到沙山高处，看到小溪上游被 180米长的黄沙阻断，上游方向则变成了一汪碧绿的深潭,深潭两侧是异常陡峻的发育有大量裂隙的花岗岩崖壁。夹在巴丹吉林沙漠和花岗岩岩体之间这一狭长幽深的潭水即是大漠天池.天池全长300米,宽60米,最大水深近10米,水位季节变化小,湖面海拔高约1 365米,与紧邻其下的湿地间有15米的高差,与附近地势最低的一个盐湖的高差达 175 米。	分析“大漠天池”能够成为淡水湖泊的原因。	以地下淡水为主要补给水源；天池海拔高于其下游湿地，气温较低，蒸发较弱；堰塞体由黄沙组成，渗水性强，利于湖水向下游湿地渗漏，排出盐分。	大漠天池能够成为淡水湖泊的原因主要有三点：首先，水体更新较快；其次，不断有降水、积雪融水汇入，使盐度相对较低；最后，由于海拔较高，无法达到水体蒸发需要的温度，因此蒸发作用较弱。	大漠天池之所以能够成为淡水湖泊，主要有以下几个原因：首先，天池港全长300米，宽60米，湖面宽广，能够调节局部气候，使蒸发作用相对较弱；其次，水源补给丰富，保障了湖泊的水量充足；此外，大漠天池海拔较高，气温较低，热量少，也导致蒸发作用相对较弱，有利于维持湖泊的水量。因此，这些因素共同作用使得大漠天池成为一个适合形成淡水湖泊的地方。	b	stud_b	"大漠天池"能够成为淡水湖泊的原因主要有以下几点： 1. 地质屏障：黄沙的阻断作用形成了一个天然的屏障，阻止了外部的盐分和沙土进入潭内。这种屏障类似于人工建造的堤坝，有效地隔离了潭内的水体，使其不受外界盐分污染。 2. 花岗岩崖壁的保护作用：大漠天池两侧的异常陡峻的花岗岩崖壁不仅提供了天池的自然边界，还起到了保护潭水不受外界影响的作用。花岗岩是一种硬质岩石，能够有效地阻止水分渗透和盐分渗入。 3. 水位变化小：问题中提到，水位季节变化小，这意味着潭水的补给和排水相对稳定，减少了外部盐分和其他物质进入潭内的机会。 4. 高海拔位置：大漠天池的湖面海拔高约1365米，与周围地势形成了明显的高差。这种高海拔位置使得潭水的水源主要来自于地表径流和地下水，减少了与盐湖等盐分高的水体的直接接触。 5. 湿地的补水作用：大漠天池与湿地之间有15米的高差，湿地可能是潭水的补水来源。湿地能够通过蒸发和渗透…	"大漠天池"能够成为淡水湖泊的原因主要有以下几点：首先，该地区的地质构造特殊，夹在巴丹吉林沙漠和花岗岩岩体之间，形成了一个狭长幽深的潭水，阻隔了沙漠的黄沙，使得湖水不受沙漠的侵蚀。其次，周围的岩石崖壁发育有大量裂隙，这些裂隙可以为地下水提供补给，维持湖水的水量和水质。另外，该地区的地形高低差异较大，与附近的湿地和盐湖之间有高差，这也有利于形成淡水湖泊。总体来说，大漠天池处于特殊的地质环境中，得到了地形、地质和水文条件的综合作用，才能成为一个淡水湖泊。 "	tie	a	a	model_a	model_a	stud_a
2020 年，某科考队考察了内蒙古自治区阿拉善沙漠世界地质公园内的“大漠天池”。队员们爬到沙山高处，看到小溪上游被 180米长的黄沙阻断，上游方向则变成了一汪碧绿的深潭,深潭两侧是异常陡峻的发育有大量裂隙的花岗岩崖壁。夹在巴丹吉林沙漠和花岗岩岩体之间这一狭长幽深的潭水即是大漠天池.天池全长300米,宽60米,最大水深近10米,水位季节变化小,湖面海拔高约1 365米,与紧邻其下的湿地间有15米的高差,与附近地势最低的一个盐湖的高差达 175 米。	简述“大漠天池”对当地生态环境的影响。	为下游湿地提供稳定的补给水源；调节气候，增加空气湿度；淡水利于水生植物生长；为动物提供栖息地和水源。	“大漠天池”对当地生态环境的影响主要包括以下几个方面：它可以补给周边植被，调节局部水汽蒸发，降低土壤盐度，有利于草木长成，同时提供淡水作为生物的水源。	“大漠天池”对当地生态环境产生了积极影响。它丰富了当地的生态环境，为动植物提供了水源。同时，它也改善了沙漠中缺水的现象，为当地气候起到一定调节作用。	b	stud_a	"大漠天池"对当地生态环境的影响是多方面的。首先，它为当地的生物提供了一个生存的水源，尤其是在干旱的沙漠环境中，这个碧绿的深潭成为了众多野生动植物的生命之源。例如，水边可能会有各种水生植物和动物，而周围的湿地则可能成为候鸟的停留地。 其次，"大漠天池"的存在也对当地的气候有所影响。由于水体的存在，周围的温度可能会略低一些，水面蒸发也会影响当地的水循环。另外，水体的存在还可能减少沙漠化的速度，因为水体可以稳定沙土，减少风沙的侵蚀。 此外，"大漠天池"也是当地生态系统多样性的一个标志。它的存在促进了生物多样性，提供了一个独特的生态环境，支持了多种生态过程。例如，水体周围的花岗岩崖壁和湿地为特定物种提供了栖息地。 然而，值得注意的是，任何生态系统的变化都可能对当地的生态平衡产生影响。因此，保护和合理利用"大漠天池"对于维护当地生态环境的健康至关重要。	“大漠天池”作为内蒙古自治区阿拉善沙漠世界地质公园内的一处自然景观，对当地生态环境具有一定的影响。首先，大漠天池的存在为当地生物提供了一个重要的水源，为周围植被和动物的生存提供了保障。其次，天池周围的湿地生态系统也受益于大漠天池的存在，形成了一个生态链条。此外，大漠天池的景观吸引了大量游客前来参观，从而促进了当地旅游业的发展，为当地经济带来了一定的收益。然而，游客过多也可能对当地生态环境造成一定的压力，需要加强保护措施以保持景区的生态平衡。 .	a	b	a	model_a	model_a	stud_a
横贯关中平原（也称渭河平原）的渭河全场 787 千米。关中平原是中国历史上农业最富庶地区之一，也是目前陕西省城市最多、人口密度最大、经济最发达的地带。近年来,渭河流域水资源紧缺问题日益严重。	近年来渭河流域水资源紧缺问题日益严重。从人类活动的角度,分析造成这一问题的原因（4 分）(3)近年来渭河流域水资源紧缺问题日益严重。	原因包括沿河城市大量抽水截留；人口增加，生产、生活用水量激增；沿河城市污染排放，导致水质下降。抽水截留必答，其余任答一点即可。	近年来，渭河流域水资源紧缺问题日益严重，主要原因包括不合理的水资源利用、不合理的开采矿产资源破坏森林植被、人类过度耕种和放牧对大气层的污染以及排放废料污染水资源。	近年来，渭河流域水资源紧缺问题日益严重，主要原因在于人类活动的影响。首先，人们大量使用渭河水进行灌溉，导致渭河流量急剧减少。其次，城市工业化的发展使得渭河水受到污染，无法被有效利用。此外，渭河流经关中平原，人口密集，居民用水需求大，但同时也导致渭河水受到居民用水污染，进一步加剧了水资源紧缺问题。因此，需要采取有效措施来解决渭河流域水资源紧缺问题，保护好我们珍贵的水资源。	b	stud_b	造成渭河流域水资源紧缺问题的原因主要包括以下几点： 1. 人口增长与城市化：随着人口的快速增长和城市化进程的加快，城市的水需求增加，特别是工业用水和生活用水的需求量大幅上升。例如，西安作为陕西省的政治、文化、经济中心，其人口众多，工业活动频繁，导致城市用水需求大增。 2. 农业用水增加：关中平原是中国历史上著名的农业发达地区，农业用水需求量大。近年来，农业生产结构调整，种植高水分作物（如水稻、蔬菜等）增加，进一步加大了农业用水量。 3. 水资源管理不善：渭河流域的水资源管理存在一定问题，如水资源的过度开采、水资源的不合理分配等。例如，部分地区在农业灌溉时使用的水资源效率不高，导致水资源浪费。 4. 气候变化：全球气候变化导致降水模式的变化，降水量的不均匀性增加，部分年份降水量减少，进一步加剧了水资源的紧张状况。 5. 水污染问题：工业排放和农业化肥、农药的使用导致水体污染，影响了水资源的…	造成近年来渭河流域水资源紧缺问题日益严重的原因主要包括以下几点： 1. 工业和城市化发展：随着工业和城市化的快速发展，渭河流域的水资源需求急剧增加。大量工厂和居民的用水量增加，导致水资源供不应求。 2. 农业用水浪费：农业是渭河流域的主要水资源消耗行业，但由于农业用水管理不当、灌溉方式落后，导致水资源浪费严重，加剧了水资源紧缺问题。 3. 污染问题：工业废水、农业农药、生活污水等污染物的排放严重破坏了渭河流域的水质，使得可供人类利用的水资源减少，进一步加剧了水资源紧缺问题。 4. 气候变化：气候变化导致了降水不均匀和水资源供应不稳定，降水少、蒸发大等气候因素也是造成水资源紧缺的重要原因之一。 综上所述，近年来渭河流域水资源紧缺问题日益严重的原因是多方面的，需要综合采取措施来解决。。	tie	b	b	tie	model_a	model_b
黄土高原地区是我国重要的能源基地，也是水土流失严重的地区。该地区的能源开发对区域经济的发展起到了重要作用，但同时也引发了一系列生态环境问题。近年来，该地区实施了一系列生态环境治理措施，包括退耕还林、水土保持、生态移民等。这些措施的实施有效地改善了当地的生态环境，但也带来了一些社会经济问题。	(2)简述黄土高原地区能源开发对经济发展的积极作用。	黄土高原地区的能源开发对经济发展起到了积极作用，因为能源开发提供了丰富的资源为当地经济的发展奠定了牢固的物质基础。此外，能源产业的发展不仅促进了相关产业的繁荣，如交通运输、机械制造等，还为当地创造了更多的就业机会。同时，能源开发还带动了周边地区的基础设施建设和社会事业发展，推动了区域经济的整体进步。	因此，黄土高原地区的能源开发不仅提供了物资保障，也促进了相关产业的发展，创造了更多的就业机会，推动了经济的进一步发展。	因此，黄土高原地区的能源开发不仅满足了当地经济的发展需求，还促进了相关产业的繁荣和区域经济的整体提升，为当地经济发展注入了新的活力。	a	tie	黄土高原地区的能源开发对经济发展产生了积极的影响，主要体现在以下几个方面： 1. 提高能源供应保障：黄土高原地区蕴藏有丰富的煤炭、石油、天然气等能源资源。能源开发和利用不仅满足了当地的能源需求，还通过输送至其他地区，增强了国家能源供应的稳定性和可靠性。 2. 推动工业发展：能源开发为当地的工业发展提供了强有力的物质基础。煤炭作为主要的能源，支持了煤炭开采、化工、钢铁、建材等行业的发展，促进了工业规模的扩大和产值的增加。 3. 促进就业和收入增长：能源开发项目的建设和运营为当地提供了大量的就业机会，提高了居民的收入水平。同时，能源行业的发展还为政府提供了税收和其他经济收益，增强了地方财政的收入。 4. 推动基础设施建设：为了保障能源的开采、运输和使用，黄土高原地区的基础设施建设得到了加强，包括铁路、公路、电网等。这些基础设施的建设不仅服务于能源行业，还促进了区域内其他行业的发展。 5. 增…	黄土高原地区作为我国重要的能源基地，能源开发对经济发展的积极作用主要体现在以下几个方面： 首先，能源开发带动了当地的产业发展。通过开发煤矿、石油和天然气资源，促进了相关产业的发展，如煤炭加工、石油化工等，进而带动了区域经济的增长。 其次，能源开发为当地提供了大量就业岗位。能源产业的发展需要大量的人力资源，因此能够吸纳大量的就业人口，有助于解决当地的就业问题，提高居民的收入水平。 再次，能源开发增加了地方政府的财政收入。通过资源开发所得的税收和利润可以用于地方基础设施建设、教育医疗等公共事业，促进了当地经济的发展。 总的来说，黄土高原地区能源开发对经济发展起到了积极作用，促进了当地经济的增长和就业机会的增加。 。	a	b	a	tie	model_a	model_b
黄土高原地区是我国重要的能源基地，也是水土流失严重的地区。该地区的能源开发对区域经济的发展起到了重要作用，但同时也引发了一系列生态环境问题。近年来，该地区实施了一系列生态环境治理措施，包括退耕还林、水土保持、生态移民等。这些措施的实施有效地改善了当地的生态环境，但也带来了一些社会经济问题。	(3)评价黄土高原地区实施生态环境治理措施的影响。	黄土高原地区实施生态环境治理措施取得了积极的效果。这些措施有效地改善了当地的生态环境，减轻了水土流失的程度，提高了土地的质量，从而有利于农业生产和生态恢复。生态移民等措施可以减轻当地的人口压力，有助于缓解人地矛盾，促进可持续发展。然而，这些措施也带来了一些社会经济问题，如移民安置、就业转型等等。这些问题需要政府和社会各界的共同努力解决。	在黄土高原地区实施生态环境治理措施的影响中，防沙治沙工程发挥了重要作用。这些措施有效改善了当地的生态环境，降低了水土流失程度，提升了土地质量，对农业生产和生态恢复都是有利的。同时，生态移民等措施也有助于减轻当地人口压力，缓解人地矛盾，推动可持续发展。另外，积极参与环保活动，如植树造林和环保宣传，可以提高社会对气候变化的关注度和行动力。	黄土高原地区实施生态环境治理措施的影响是积极的。这些措施有效地改善了当地的生态环境，减少了水土流失，提高了土地质量，有利于农业生产和生态恢复。生态移民等措施减轻了当地的人口压力，有助于缓解人地矛盾，促进可持续发展。此外，人口分布的改变可能会对环境产生影响，例如沿海地区的人口密度较大，可能导致资源短缺和环境质量下降。然而，这些措施也带来了一些社会经济问题，如移民安置、就业和转型等，需要政府和社会各界共同努力解决。	b	stud_b	黄土高原地区实施生态环境治理措施的影响可以从多个方面进行评价。首先，从生态环境改善的角度来看，退耕还林、水土保持和生态移民等措施有效地减缓了水土流失，恢复了植被覆盖，提高了土壤保水能力，减少了洪水和泥沙淤积，改善了当地的生态环境。例如，通过退耕还林，黄土高原地区的植被覆盖率显著提高，减缓了土壤侵蚀，降低了洪水风险。 其次，从社会经济角度来看，这些治理措施虽然带来了生态环境的改善，但也引发了一些社会经济问题。例如，生态移民可能导致当地居民的生活和经济活动受到影响，需要通过政府补贴和其他支持措施来缓解。同时，生态环境治理可能会限制某些能源开发活动，影响当地的经济发展。 最后，从长远来看，黄土高原地区的生态环境治理措施对于维护生态平衡和可持续发展具有重要意义。通过综合考虑生态环境保护和社会经济发展的平衡，黄土高原地区可以实现可持续发展，促进区域经济的健康增长，同时保护和改善生态环境。	黄土高原地区实施生态环境治理措施的影响是双重的。一方面，这些措施有效地改善了当地的生态环境，减少了水土流失、提升了植被覆盖率，提高了生态系统的稳定性。这对于保护当地的生态环境、维护水资源的可持续利用具有积极的作用。另一方面，生态环境治理措施也带来了一些社会经济问题，比如实施退耕还林政策可能导致农民收入减少，生态移民可能面临就业问题等。因此，在实施生态环境治理措施时，需要综合考虑生态环境和社会经济的平衡，采取更加科学、可持续的发展方式。 举例来说，退耕还林政策虽然能够减少水土流失，但也会影响当地农民的种植收入。为了解决这个问题，可以引入新的农业种植方式或者发展生态旅游等产业，为当地农民提供新的经济来源。这样既能保护生态环境，又能解决农民的经济问题。 。	b	a	a	tie	model_a	model_b
某岛国人口约500万（2022年数据），经济以传统农业和渔业为主，交通以水运为主。近年来，该国政府计划大力发展海洋旅游业，欲将北部海域的某珊瑚礁群建设为世界级旅游胜地。图示区域是该国珊瑚礁群分布最为集中的区域，海域水温高、盐度低，珊瑚虫与藻类共生，形成的珊瑚色彩斑斓、造型奇特，吸引了大量游客前来观光。	(1)分析该国北部海域珊瑚礁群分布密集的原因。	该海域处于低纬地区，水温高，有利于珊瑚虫生长和繁殖。该海域受沿岸淡水注入的影响，盐度低，有利于珊瑚虫生存。海水清澈，阳光充足，有利于珊瑚虫共生体藻类的光合作用，进而促进了珊瑚的生长和发育。	北部海域珊瑚礁群分布密集的原因是多方面的。首先，该海域处于低纬地区，水温高，有利于珊瑚虫生长和繁殖。其次，该海域受沿岸淡水注入的影响，盐度低，有利于珊瑚虫生存。此外，生态建设工程也在这一地区展开，改善了区域气候，增加了空气湿度，减少了沙尘暴等自然灾害的发生。个人应该积极行动，应对气候变化，这将对全球气候变化的减缓产生积极影响。	该国北部海域珊瑚礁群分布密集的原因是多方面的。首先是受沿岸淡水影响，盐度较低，使珊瑚虫能够在这一地区生存。其次，海水清澈且阳光充足，有利于珊瑚虫和共生体藻类进行光合作用，从而促进珊瑚的生长和发育。同时，为了进一步促进该地区生态旅游产业的发展，需要加强基础设施建设，提高南部地区的交通可达性和服务水平，为游客提供更好的旅游体验。	b	tie	该国北部海域珊瑚礁群分布密集的原因主要是由于该区域的水温和盐度条件非常适宜珊瑚生长。珊瑚虫通常在水温较高、盐度适中的环境中繁殖和生长。北部海域的水温高，能够满足珊瑚虫的生长需求，同时，海域的盐度低也有利于珊瑚虫与藻类的共生关系，这种共生关系是珊瑚礁群形成的关键。珊瑚虫与特定类型的藻类（称为珊瑚藻）共生，藻类通过光合作用为珊瑚虫提供营养，而珊瑚虫则为藻类提供庇护和营养物质。这种共生关系使得珊瑚礁群能够在北部海域形成并繁茂。 此外，该国北部海域珊瑚礁群的分布密集还可能与地理位置和水流有关。珊瑚礁群通常在海底的特定结构上形成，如珊瑚礁的基底可能是珊瑚虫长期沉积的产物。这些结构为珊瑚提供了生长的基石，同时也可能影响到水流的路径和速度，创造出一个相对稳定的环境，有利于珊瑚礁群的形成和发展。	(1) 该国北部海域珊瑚礁群分布密集的原因是因为该海域的水温高、盐度低，这种环境条件非常有利于珊瑚虫与藻类的共生，促进了珊瑚礁的生长。此外，北部海域可能还存在适宜的水流和光照条件，进一步促进了珊瑚礁的繁殖与生长。这些因素共同作用下，使得珊瑚礁群在该地区分布密集。 。	b	a	b	model_b	model_a	model_b
