# Supplementary material
Source: ML conference proceedings conference paper supplement (https://openreview.net/forum?id=R7pR4dzgAV)
Supplement: supplementary_material [file geoen_mismatches.xlsx]

## Sheet: Sheet1
id	reference	stud_answer_a	stud_answer_b	model_answer_a	model_answer_b
6	采取措施减少海风对屋顶海草的吹扫、减弱飞鸟和走兽对屋顶的破坏、以及削弱流水等外力对海草屋顶的侵蚀。	1. 紧绷渔网覆盖在海草房上，可以减少海草水分的散失，实现降温效果。 2. 渔网覆盖在房顶上可以有效减少冬天热量的散失，达到保温效果。 3. 这种覆盖方式可以实现冬暖夏凉的效果。	海草房上覆盖渔网的主要目的有两个：一是为了方便晾晒渔网，便于渔猎；二是防止海草被风吹走。
11	贵州省地形崎岖，主要是喀斯特地貌，地形成形缓慢，土层薄，降水丰沛导致流水侵蚀作用强，土壤易流失。地下多溶洞和裂隙，地表水下渗多，导致地表缺水。	贵州省生态环境十分脆弱的原因主要有四个：其一，贵州属于喀斯特地貌，地势起伏，地形复杂；其二，水土流失严重，土地资源受到严重损耗；其三，贵州省平原少，大部分地区为山地，容易受到自然灾害的影响；其四，地形崎岖，交通不便，给生态环境保护和修复带来一定困难。	贵州省生态环境十分脆弱的原因主要有三个：首先，由于喀斯特地貌特殊，容易受到流水侵蚀和溶蚀的影响，形成了独特的地形；其次，气候湿润，降水丰富，导致侵蚀作用加剧；最后，夜间降水量极其丰富，而植被覆盖不足，导致水土流失严重。
12	该地区夏季高温多雨，冬季温和少雨，雨热同期，常有夜间降水，气温的年较差和日较差都较小。	贵州省的气候特点是夏季炎热，冬季凉爽，气温差异较大。同时，该地区气候湿润，降水相对丰富。在降水分布上，夜间降水比白天多，属于夜雨型气候。	贵州省属于亚热带季风气候，夏季高温多雨，冬季少雨。昼夜温差较大，春末夏初昼夜降水量季节变化明显。
14	接近市场，辐射人口多，市场规模大，符合当地消费者需求；运输毛油与运输精炼油的成本相近，由精炼油生产到小包装的工艺衔接紧密，产品可快速投放市场，有利于保证产品的新鲜度。	该公司选择在杭州、广州建设精炼油和小包装产品生产基地的主要原因包括以下几点：首先，这两个地区都位于发达地区，具有充足的资金支持；其次，杭州、广州的科技水平较高，拥有优秀的精炼技术；第三，这两个地区的交通线路较为便利，有利于将产品运输到多个市场；最后，选择在当地上市可以保持产品的新鲜度，为公司的发展提供更好的保障。	该公司选择在杭州和广州建设精炼油和小包装产品生产基地的主要原因包括以下几点：首先，广州和杭州等地制造业发达，有利于提高生产效率和降低成本；其次，杭州靠近市场，交通便利，便于产品的流通和销售；此外，这两处城市靠近沿海，有利于产品出口到国外市场；最后，技术先进，机械发展迅速，有利于提高产品质量和生产效率。
15	主要收入归还村合理分配收益，兼顾公平和效率，利于乡风和谐，减少矛盾；通过智力援助，提升村民的文化水平和技能。	优势：村集体企业主导的旅游开发模式有利于发挥本地独特文化的作用，激发了村民的服务热情，给游客更好的体验感。同时，这种模式发掘了村民的导游作用，引导游客更好地游览项目。此外，这种模式有利于保护哈尼传统文化，将天然旅游优势转化为经济优势。	优势：首先，村集体企业主导的旅游开发模式能够有效提高当地居民收入，改善贫困落后状况。其次，村集体企业能够展示完整独特的哈尼传统民居和文化，吸引游客前往参观。此外，这种模式可以避免外来经营者对当地传统民风民俗和梯田生态系统造成破坏。最后，村民配合度更高，推进政策改革更加顺利。
17	黑龙江省在2000年前增长率略低于1，增长缓慢；2000年后快速增长，目前仍有增长趋势。吉林省长期维持在略高于1的水平，变化幅度小，近几年略有下降。辽宁省总体呈小幅度上升趋势，2004年以前略低于1，2004年之后维持在1上下，近年来略有提升。21 黑龙江省地广人稀,人均耕地面积大;农业生产规模和机械化水平高;黑土分布广,水热组合条件较好,适宜发展粮食生产;国家巩固、提升东北地区商品粮的核心地位,政策激发了农民种粮的积极性。	东北三省农业生产区位熵在1990~2018年间呈现出明显的变化特点。总体趋势是呈上升的态势。其中，吉林省的区位熵变化不大，总体水平较高，而辽宁省的水平相对较低。而黑龙江省的区位熵变化较大，水平显著提高。	1990年至2018年间，东北三省农业生产区位熵的变化特点如下：黑龙江的农业生产区位熵上升幅度最大，吉林呈波动增长，变化幅度较小，而辽宁则呈缓慢增长，变化幅度较稳缓。
20	我们应大力发展粮食生产，支持主产区建设粮食生产核心区，确保粮食种植而积和产量保持稳定，巩固提升全国粮食生产基地的地位，推进高标准农田建设，提高机械化水平，加强种质资源的保护和利用，支持高效旱作农业的发展，并高质量推进粮食生产功能区、重要农产品生产保护区和特色农产品优势区的建设，打造绿色农产品生产加工供应基地。	为了保障东北地区国家粮食安全，我们可以采取以下措施： 首先，加大科技投入，以提高粮食产量。其次，实行科学管理，提高储粮能力。最后，保护环境，实现可持续发展。通过这些措施，我们可以有效地保障东北地区的粮食安全。	为了保障东北地区的国家粮食安全，我们可以采取以下措施： 1. 建立粮食审核机制，确保粮食储备充足； 2. 提升粮食生产技术，增加产量，保持粮食数量的稳定供应； 3. 提高农业专业水平，改进种植方式，确保粮食质量； 4. 制定政策措施，为东北地区粮食安全提供保障。
25	该地区的森林和温泉等自然条件优越，非常适宜康养，地处世界发达地区，居民消费能力强，市场广阔，地理位置在欧洲中部，海陆空交通便捷，是一个传统的旅游胜地，基础设施完善，接待能力强，经济发达，医疗康养等服务水平高，历史悠久，是一个世界著名的文化遗产小镇，知名度高。	巴登巴登小镇成为世界著名康养小镇的区位条件包括：具有温带海洋性气候，全年温和湿润、气候宜人；森林覆盖率高，空气质量好；温泉广布，提供温泉疗养服务；休闲娱乐项目丰富多样，促进身心健康；政府有政策鼓励支持；拥有世界著名文化遗产地，文化有蕴丰厚；基础设施完善，康养地建设经验丰富。	巴登巴登小镇成为世界著名康养小镇的区位条件主要包括以下几点：首先，该小镇地处旅游发展资源丰富的德国，拥有得天独厚的旅游背景；其次，小镇位于国家森林公园内，环境清幽优美；再者，巴登巴登小镇拥有丰富的优势资源供给，能够满足不同游客的需求；此外，小镇提供多样化的休闲活动项目，让游客能够尽情放松身心；最后，巴登巴登小镇还提供着许多令人赞赏的旅游度假服务，为游客提供舒适便捷的体验。
53	长江流域冬季受来自西伯利亚的寒冷北风影响，加上流域内的丘陵地形和高原比重大，加重了冬季的寒冷；夏季，受副高控制，加上此季节太阳辐射强，使得夏季炎热；冬季的寒冷和夏季的炎热构成强烈对比，气温年、月平均日较差均较大，因此形成海洋性过渡气候。	长江流域主要为海洋性过渡气候的形成原因有以下几点：首先，纬度较低的东部受东南季风影响，西部受西南季风影响，水分性质影响较大；其次，北部有高大山脉或高原阻挡西北季风，导致气温年、月平均日差较小；再者，三面环海，地势平坦，有利于海洋上温暖湿润的水汽深入内陆；最后，纬度较低使得太阳幅射量和昼夜长短差距小，平均日较差也较小。	长江流域主要为海洋性过渡气候的形成原因是因为地形以山地、高原为主，海拔高，温度低，空气稀薄，太阳辐射大。由于坡度较高，受太阳辐射时间较少，气温也较低。
61	问题包括水资源匮乏和资金短缺；技术力量不足。措施包括在高原修建水库与水坝，实现雨水的季节调配；培养农业技术人员；推广喷灌与滴灌等节水灌溉技术；加强国际合作，解决资金短缺困难等。	主要问题：厄立特里亚的农业发展面临着两大主要问题，一是平原地区降水稀少，淡水资源匮乏；二是位于较低纬度，光照强度大，蒸发量大。 措施：为了解决这些问题，厄立特里亚可以采取一系列措施。首先，推动发展节水农业，推广滴灌技术和地膜的使用，有效利用有限的水资源。其次，引入海水淡化技术，将淡化后的海水用于灌溉农田，缓解淡水资源短缺问题。第三，针对丘陵地区，发展林业，对平原地区则发展畜牧业，实现资源合理配置。最后，加强生态保护工作，推行轮牧轮植，预防土地荒漠化，保护农业生产环境的可持续发展。通过这些措施的实施，可以促进厄立特里亚农业的可持续发展，提高农业生产效率，保障粮食安全。	"农业发展面临的主要问题、①耕地面积小③降水分配不均,分旱、雨两季⑤淡水资源不足，经济落后。采取的措施：④修建水库、雨季存水、旱季放水⑤合理利用水资源、⑥研发海水淡化装置解决生活用水、"
63	地势从南向北、自西向东趋缓；地形起伏较大，复杂崎岖；地貌类型多样，多山间河谷发育。	神农架林区的地形主要是山地和高原，地势起伏较大，整体呈现出中间高，东西低的特点。	神农架林区的地形地势特征主要是以高原和山地为主，中间高、四周低，地势起伏大，同时还有河谷地貌。
64	山中小路尽量沿等高线修建，减小工程量；便于进出人员步行。	1. 为了方便行人行走，小路的坡度被减缓。 2. 小路与等高线平行，因为地形起伏大、坡度大，需要减缓坡度。 3. 这条小路位于我国第二阶级与第三阶级的过程区域，落差大、坡度大。	神农架林区山间小路蜿蜒曲折的原因有两点：一是该地地势复杂，起伏高低不平，等高线变化曲程大，因此山间小路走向大致于等高线平行，所以显得曲折；二是地势复杂，起伏大，导致小路多盘山而行，也加大了曲折的程度。
71	多海湾，风浪小；浅海大陆架，水域浅；入海河流带来大量泥沙。	荷兰围海造陆的优势自然条件包括：濒临海洋且地形成袋状，便于施工；海拔相对较浅。	荷兰围海造陆的优势自然条件包括气候温和，海水不结冰，有利于施工。荷兰受温带海洋气候影响，全年气候温和，这有利于施工工作。此外，荷兰吹中纬度西风，一部分地形可减少水流冲击，有利于围海造陆。
73	提供水源；创造了大量的土地资源或扩大了陆地（国土）面积；提升了艾瑟尔湖两岸的交通通达度。	须德海拦海大坝的建成使荷兰填海造陆区域形成了淡水湖，为当地提供了更多的生活用水和工业用水，推动了生活水平和工业水平的提升。同时，大坝的建成稳定了填海造陆区的自然环境，促进了当地的经济发展。此外，大坝还促进了交通的稳定与发展。	1. 随着凡尔赛海堤的建成，填海造陆区域不再受海水侵袭的威胁，提供了一个稳定的自然环境。 2. 大坝的修建增加了陆地面积，扩大了人们的活动范围，进而促进了经济发展。 3. 大坝的建成有利于人口的迁入，带动了周边经济的发展。
74	地理位置优越（面向大海，背靠欧洲大陆，位于莱茵河入海口）；经济腹地广，服务范围大；水陆交通发达；政府重视，政策扶持；科技水平高；专业化程度高；完善的金融等配套服务产业。	荷兰能够成为欧洲现代物流业中心的主要原因有以下几点：首先，荷兰综合国力强盛，复合型产业发展较快，这为物流业提供了良好的发展环境。其次，政府对物流业的支持力度大，为行业发展提供了政策和资金支持。再者，荷兰在全球物流产业中占有重要比重，具有较强的竞争力。此外，物流产业是荷兰国民经济的重要支柱之一，得到了政府和企业的高度重视和投入。最后，荷兰交通便利，市场广阔，为物流业的发展提供了便利条件，使其成为欧洲现代物流业中心。	荷兰能够成为欧洲现代物流业中心的主要原因包括政府的正确决策与发展战略、发达完善的海陆空运输、装卸搬运及相关产业，优越的地理位置靠近海洋和北海，以及发达的科技和技术投入。
75	沿海滩涂资源丰富，可供养殖多种水产品；河流水量充沛，为牡蛎养殖提供了充足的水源；淡咸水交汇，水质肥沃，有利于牡蛎生长；靠近市场，交通便利，可以方便地运输和销售产品；政府支持，劳动力充足，资金雄厚，有利于牡蛎养殖业发展。	沿海地区牡蛎养殖业发展的有利条件包括：沿海滩涂资源丰富，养殖各类水产品有助于减少水资源浪费和提高利用率，促进农业可持续发展；淡咸水交汇，水质肥沃，有利于牡蛎生长；河流低潮位放水，扩大淡水影响范围，为牡蛎提供更好的生长环境；邻近市场，交通便利，便于运输和销售产品；政府支持，劳动力充足，资金雄厚，有利于促进牡蛎养殖业的发展。	该沿海地区具有气候适宜、四季皆宜旅游的优势，河流水量充足为牡蛎养殖提供了充足的水来源，同时淡咸水交汇形成的水质肥沃，对牡蛎的生长非常有利。尽管这些优势是显而易见的，但也会带来环境质量下降和交通拥堵等问题。在这种情况下，政府应该寻找并提供足够的资金和技术支持，鼓励和促进牡蛎养殖业的发展。
81	青藏高原海拔高，热量条件不足；东南部地区纬度较低，热量条件较好，降水适宜；海拔较低且地形封闭的河谷地区，热量条件较好；河谷地区，靠近河流，便于取水；河谷地区地形相对平坦，土壤肥沃。	城镇主要分布在西藏地区东南部河谷地区的自然原因有以下几点：首先，该地区水资源充沛，便于日常用水；其次，临近河流，便于发展农耕和种植水稻；第三，能提高灌溉技术，增加粮食产量；第四，河流资源丰富，能改善伙食；第五，临近河道有利于城镇的兴起；最后，运输方便，为城镇发展提供便利条件。	西藏地势高，降水少，因此人口主要分布在河流附近。西北地区干旱且风沙大，不适合人口居住。东南地区降水相对较多，同时山脉多，能够阻挡水汽形成降水，进而形成河谷，这也是城镇主要分布在该区域东南部河谷地区的自然原因。
82	有利影响包括喀斯特地貌景观独特，是良好的旅游资源，有利于发展旅游业；地下水资源丰富。不利影响包括地表崎岖，地质条件复杂，不利于交通建设；交通不便，不利于对外经济文化交流；岩层不稳定，不利于水利工程建设；耕地面积小且分散，土层薄，不利于发展农业；岩石裂隙发育，地表水资源短缺；保水性差，易造成水土流失；岩石裸露，易出现石漠化现象；生态环境脆弱。	对于喀斯特地貌广布对当地地理环境的影响，有利的方面包括：首先，喀斯特地貌适合重大工程选址；其次，地势奇特，拥有丰富的旅游资源；第三，喀斯特地区地下水资源丰富。然而，不利的方面也存在：首先，地表蓄水能力较差，地表水资源匮乏；其次，地势复杂，交通不便；第三，土壤浅薄贫瘠，不利于农业生产。	喀斯特地貌广布对当地地理环境的影响是多方面的。首先，喀斯特地貌的广布为当地带来了重要的旅游业发展机遇，吸引了大量游客前来观光。其次，喀斯特地貌的存在促进了地下岩溶洞穴的形成，有利于地下水资源的开发利用。此外，喀斯特地貌的分布也为重大工程的开发提供了便利条件。 然而，喀斯特地貌的广布也带来了一些不利因素。首先，地形崎岖的喀斯特地貌使交通不便利，给当地的交通运输带来了一定的困难。其次，由于喀斯特地貌区域的不平衡性，导致了一些地区的发展程度较低，不利于全面开发利用资源。
83	气温升高，冰雪融化，冰债物出露，松散物质增多；冰雪融水量增多，冰湖更易渍决；地表径流量增加，侵蚀和搬运能力增强。	气温升高会导致冰川融化速度加快，进而增加泥石流发生的频率。这是因为冰川融化后的水与冰中的杂质混合形成含有大量泥砂石块的特殊流体，会向河沟冲刷而去。	气温升高导致冰川融化加剧，进而增加了冰川泥石流的频率。这种现象会影响帕隆藏布江流域的河流，给当地居民带来诸多不便。
85	合理交通方式为陆海联运；因为长距离海运费用较低，节约运输成本。相比铁桶运输，使用集装箱液袋运输转运方便，只需单程运输，节约运输费用；液袋可充分利用集装箱的空间，装载量大（具有规模运输优势）。	将毛油由铁岭运输到广州精炼油生产基地，水路运输是一个合理的选择。水路运输沿海滨城市，能够承载更多的货物，从而节约运输成本。相比于铁桶运输，使用集装箱液袋运输有更多优势。集装箱液袋能够节约集装空间，装载更多的毛油，同时也更安全、高效，节省装载时间。此外，集装箱液袋方便处理和卸货，为运输过程提供了便利。	推测并解释将毛油由铁岭运输到广州精炼油生产基地的合理交通方式是铁路运输。相对于使用铁桶运输，使用集装箱液袋运输有以下优势：①集装箱液袋制作便利；②原料成本较低；③运输质量高，不与外界发生反应；④运输体积利用率更高。
86	缓解开罗人口增长的压力；缓解开罗的“大城市病”问题；创造就业；拉动埃及的经济发展；提高土地利用率等。	①减轻人口拥挤问题②扩大城市面积，发展经济③提高城市职能，促进政治等行业发展.④合理占用沙漠，节约国家土地发理配置	新首都建设的主要目的包括缓解人口压力、带动当地经济发展、促进国际交流、开发利用土地资源以及加强军事防御。
87	埃及经济相对落后，技术水平低；中国企业基建经验丰富；“一带一路”倡议，推动中企在埃及发展；中埃关系友好等。	中国企业具有先进的技术和优质的产品，建筑方面经验丰富，拥有充足的资金和材料供应。	选择由中国企业承包建设埃及新首都商务区项目有几个理由。首先，中国技术先进、国力强盛，能够促进商务交流。其次，中埃有着良好的国家往来，这也是对中国表达善意的体现。最后，合作的目的明确，相信中国企业的专业性能够确保项目顺利进行。
95	为下游湿地提供稳定的补给水源；调节气候，增加空气湿度；淡水利于水生植物生长；为动物提供栖息地和水源。	“大漠天池”对当地生态环境的影响主要包括以下几个方面：它可以补给周边植被，调节局部水汽蒸发，降低土壤盐度，有利于草木长成，同时提供淡水作为生物的水源。	“大漠天池”对当地生态环境产生了积极影响。它丰富了当地的生态环境，为动植物提供了水源。同时，它也改善了沙漠中缺水的现象，为当地气候起到一定调节作用。
97	黄土高原地区的能源开发对经济发展起到了积极作用，因为能源开发提供了丰富的资源为当地经济的发展奠定了牢固的物质基础。此外，能源产业的发展不仅促进了相关产业的繁荣，如交通运输、机械制造等，还为当地创造了更多的就业机会。同时，能源开发还带动了周边地区的基础设施建设和社会事业发展，推动了区域经济的整体进步。	因此，黄土高原地区的能源开发不仅提供了物资保障，也促进了相关产业的发展，创造了更多的就业机会，推动了经济的进一步发展。	因此，黄土高原地区的能源开发不仅满足了当地经济的发展需求，还促进了相关产业的繁荣和区域经济的整体提升，为当地经济发展注入了新的活力。
99	该海域处于低纬地区，水温高，有利于珊瑚虫生长和繁殖。该海域受沿岸淡水注入的影响，盐度低，有利于珊瑚虫生存。海水清澈，阳光充足，有利于珊瑚虫共生体藻类的光合作用，进而促进了珊瑚的生长和发育。	北部海域珊瑚礁群分布密集的原因是多方面的。首先，该海域处于低纬地区，水温高，有利于珊瑚虫生长和繁殖。其次，该海域受沿岸淡水注入的影响，盐度低，有利于珊瑚虫生存。此外，生态建设工程也在这一地区展开，改善了区域气候，增加了空气湿度，减少了沙尘暴等自然灾害的发生。个人应该积极行动，应对气候变化，这将对全球气候变化的减缓产生积极影响。	该国北部海域珊瑚礁群分布密集的原因是多方面的。首先是受沿岸淡水影响，盐度较低，使珊瑚虫能够在这一地区生存。其次，海水清澈且阳光充足，有利于珊瑚虫和共生体藻类进行光合作用，从而促进珊瑚的生长和发育。同时，为了进一步促进该地区生态旅游产业的发展，需要加强基础设施建设，提高南部地区的交通可达性和服务水平，为游客提供更好的旅游体验。
9	冰川堆积体在河流的左岸形成凸岸，导致河道变窄和河水变深，使得主河道靠近右岸，流速加快，从而加强了对右岸的侵蚀，经过长期的侵蚀，右岸逐渐形成凹岸，河岸也由直变弯。	冰川泥石流堆积体对虚线框内河岸形态变化的影响过程是这样的：首先，冰堆积物改变了流水的方向；接着，河流长期蚀变冰堆积物，使河岸逐渐呈现出弯曲的河道形态；最终，河流的流向也被改变，逐渐形成复杂的曲流形态。		冰川泥石流堆积体对河岸形态的影响是一个逐步的过程，通常包括以下几个阶段： 1. **堆积初期**：当冰川泥石流发生时，它会携带大量的泥砂石块和碎冰流向下山坡。这些物质在冲击过程中会对河岸造成侵蚀，形成新的河床和河岸线。 2. **堆积加深**：随着泥石流的持续，堆积物逐渐堆叠起来，形成新的河岸线和河床。这些堆积物可能会阻塞河流的正常流向，导致河道变窄或变弯。 3. **河岸退缩**：在堆积物的影响下，河岸可能会因为受到冲击和侵蚀而退缩。这种退缩可能会导致河岸线向内侧移动，形成新的河岸线。 4. **河床抬高**：随着泥石流堆积物的不断堆积，河床的平均高度会上升。这可能会导致河流的水面下降，或者在某些情况下，河流可能会改变其流向寻找新的低洼路径。 5. **长期稳定**：一旦泥石流堆积物稳定下来，它们可能会形成新的河岸线和河床。这些堆积物可能会长期影响河道的形态，直到新的泥石流事件发生。 …
15	主要收入归还村合理分配收益，兼顾公平和效率，利于乡风和谐，减少矛盾；通过智力援助，提升村民的文化水平和技能。	优势：村集体企业主导的旅游开发模式有利于发挥本地独特文化的作用，激发了村民的服务热情，给游客更好的体验感。同时，这种模式发掘了村民的导游作用，引导游客更好地游览项目。此外，这种模式有利于保护哈尼传统文化，将天然旅游优势转化为经济优势。		阿者科村实行村集体企业主导的旅游开发模式具有以下优势： 1. 保护传统文化：通过不租不售、不靠外来资本介入的方式，阿者科村成功保护了哈尼传统民居和梯田生态系统，保留了原住民的生活方式，有利于传承独特的地方文化。 2. 提高村民收入：通过组织村民成立旅游发展公司，自我经营和管理，公司收入归全村所有，村集体公司留成30%，村民分红占70%，有效提高了当地村民的收入和生活水平。 3. 增强村民主人翁意识：这种模式使村民更加重视对传统民居、梯田等遗产的保护，因为他们直接从中获得收益，增强了村民对保护文化遗产的自觉性。 4. 促进可持续发展：内源式发展模式减少了对外部资本的依赖，降低了环境破坏的风险，实现了旅游开发与生态保护的平衡，有利于长期的可持续发展。 5. 促进地方经济发展：通过旅游业的发展，阿者科村不仅提升了村民的生活质量，还为地方经济注入了新的活力，促进了当地经济的多元化和稳定增长。
21	该地区以雨水、地下水、冰雪融水为主要水源补给，存在春汛和夏汛，导致径流量季节变化大，结冰期长且含沙量大，有凌汛现象，苏赫巴托市以上河段水能资源丰富。	指出色朗格河的主要水文特征包括流量大、流程长和流域面积广。		色楞格河的主要水文特征包括： 1. 水量充沛：作为蒙古最大河流，色楞格河的水量丰富，是蒙古北部地区的主要水源。 2. 长度：全长约1024公里，流经蒙古北部并注入俄罗斯的贝加尔湖。 3. 水流特性：河流的湍急程度因地理位置而异，苏赫巴托尔以上的河段水流湍急，河床落差约为720米，这表明该河段具有较大的水能潜力。 4. 航运条件：色楞格河的下游河段在5月之后水量充足，河道平稳，适宜通航。 5. 水资源分配：由于蒙古南部地区水资源相对缺乏，为了缓解这一问题，提出了“北水南调”计划，即在蒙古和俄罗斯边境的苏赫巴托尔市附近筑坝，控制水流，并通过挖掘运河将水引至蒙古南部的扎门乌德地区。
33	积极影响包括有利于提高中国外贸出口，增加外汇收入；促进中国与蒙古、俄罗斯的文化交流；拓宽能源进口渠道，保障中国能源安全；带动西北地区经济发展，有助于国家稳定；合理建议是进一步优化产业结构和发展模式，发展绿色、低碳的循环经济，实现人与自然的持续协调发展；维持社会经济稳定的基础上，避免对生态环境的进一步干扰和破坏；加强生态保育和修复，优先发展对生态干扰或破坏较小的绿色产业和生态产业，在生态保育中适度发展经济。	对中蒙俄经济走廊的建设对中国发展产生了积极影响，包括推动中国经济发展、促进中国生态环境保护、为中国发展提供机遇、促进和深化中国对外开放程度以及加强了与各国的联系，推进各个要素的流通。为了实现绿色可持续发展，建议在中蒙俄经济走廊的优化发展区中稳步推进经济发展，推动绿色产业发展，开发清洁能源。在重点发展区方面，可以依托优美环境发展旅游业和林业。对于保育发展区，应该建设生态自然保护区，适当发展旅游业和绿色产业。		建设中蒙俄经济走廊对中国发展具有多方面的积极影响： 1. 经济合作加深：中蒙俄经济走廊的建设促进了三国之间的经济合作，加强了区域内的贸易往来和投资流动，提升了区域经济的整体竞争力。 2. 促进区域一体化：走廊的建设有助于推动亚欧大陆东部和西部的经济一体化，增强区域内的互联互通，促进了区域经济的平衡发展。 3. 绿色发展模式：通过将中蒙俄经济走廊划分为优化发展区、重点发展区和保育发展区，并提出相应的绿色可持续发展建议，可以有效地实现经济发展与生态保护的平衡，推动绿色发展模式的形成。 针对不同类型的区域，以下是针对绿色可持续发展的合理建议： 1. 优化发展区（经济发达、生态优良）： - 加强环境监管和保护措施，确保生态环境的持续优良。 - 推广清洁能源技术，鼓励使用可再生能源，减少对化石燃料的依赖。 - 促进绿色产业发展，如环保材料、节能产品等，提升产业结构的绿色水平。 - 实施高质量的城市…
43	从5月至9月，随着太阳直射点的北移，气压带和风带也随之北移；德班附近海域（非洲30°40°S大陆东侧海域）受西北风控制，盛行离岸风，引发上升流；深层海水上泛导致浮游生物繁盛，饵料丰富；西风漂流加强，厄加勒斯浅滩渔场水温降低，沙丁鱼向水温适宜的东岸海域迁徙。	沙丁鱼每年5月至9月向德班附近海域迁徙的原因是因为此时南北半球处于秋冬季节，气温寒冷，水域温度较低，不利于鱼类生存。同时，盛行中纬雨风，强风大浪也不利于鱼类繁殖。而德班附近海域的水温适宜沙丁鱼生存，且在这个时候天敌较少，相对安全，因此沙丁鱼选择在这里生长。		推测沙丁鱼每年5月至9月向德班附近海域迁徙的原因与它们适宜的水温范围有关。在这个时期，南非沿海的水温通常会升高，接近或超过沙丁鱼的适宜水温范围（14~20℃），为它们的生长和繁殖提供了理想的环境条件。 此外，厄加勒斯浅滩渔场在这个季节可能会出现丰富的食物资源，吸引沙丁鱼聚集。这种食物丰富的环境有利于沙丁鱼的繁殖和后代的成长。游客们被这些壮观的鱼群吸引，来到现场观赏，形成了一个重要的旅游活动。
45	时段为5-9月，理由是在这段时间内，气温较高，舒适宜人，白昼时间长，适合出行。	阿拉斯加州的夏季（6～9月）是前往该地旅游的黄金时段。这是因为夏季时，该地气候凉爽，适合户外活动和探索自然景观。此时，阿拉斯加州的植物生长茂盛，森林景观非常壮观，给游客带来美妙的观赏体验。因此，夏季是每年游客前往阿拉斯加州的最佳时机。		阿拉斯加州的自然景观确实独特，吸引了大量的游客前来探索。每年前往阿拉斯加州旅游的黄金时段主要集中在夏季，即6月至8月之间。以下是几个原因，解释了为什么这个时段被认为是旅游的黄金时期： 1. 天气条件：夏季的气候相对温和，日间温度通常在50°F至60°F（10°C至15°C）之间，这使得游客可以在户外活动而不必担心极端的寒冷。同时，夏季的白昼长达20小时左右，提供了充足的时间进行户外活动。 2. 野生动物观察：夏季是阿拉斯加州许多野生动物的繁殖季节，包括鲸鱼、鲸鲨、海豚、海豹、企鹅、海雕和各种鸟类。例如，鲸鱼季节通常在6月至9月，游客可以在当地的海岸线上观察到这些庞大的哺乳动物。 3. 冰川和冰川湖：夏季是冰川和冰川湖最容易接近的时期，因为它们在夏季开始融化，形成壮观的景观。例如，门斯克冰川和马克思冰川是游客们常去的景点。 4. 冰川登山和徒步：夏季的温度适宜，允许游客进行冰川登山和徒步旅…
53	长江流域冬季受来自西伯利亚的寒冷北风影响，加上流域内的丘陵地形和高原比重大，加重了冬季的寒冷；夏季，受副高控制，加上此季节太阳辐射强，使得夏季炎热；冬季的寒冷和夏季的炎热构成强烈对比，气温年、月平均日较差均较大，因此形成海洋性过渡气候。	长江流域主要为海洋性过渡气候的形成原因有以下几点：首先，纬度较低的东部受东南季风影响，西部受西南季风影响，水分性质影响较大；其次，北部有高大山脉或高原阻挡西北季风，导致气温年、月平均日差较小；再者，三面环海，地势平坦，有利于海洋上温暖湿润的水汽深入内陆；最后，纬度较低使得太阳幅射量和昼夜长短差距小，平均日较差也较小。		长江流域主要表现为海洋性过渡气候的形成原因主要包括以下几点： 1. 地理位置：长江流域位于中国东部，靠近太平洋和黄海，受海洋性气候的影响较大。海洋的温度相对稳定，能够在一定程度上调节陆地气候的季节性变化。 2. 海洋热量的影响：长江流域靠近海洋，海洋在冬季能够提供较多的热量，减少了陆地的冷空气影响，使得冬季气温相对较高。同样，在夏季，海洋的冷空气也能有效地降低陆地的高温，减少了夏季的极端高温天气。 3. 地形因素：长江流域地形较为复杂，拥有多个山脉和平原，这些地形特征能够影响空气流动和气候条件。山脉的存在能够阻挡或分散来自不同方向的气流，导致气候条件的局部差异。 4. 气候系统的交互作用：长江流域处于亚热带地区，受亚热带气候系统的影响，气候具有季节性的温差较小，四季分明，但温差不大。同时，长江流域的气候也受到来自北方的冷空气和来自南方的温暖湿润空气的交互作用，这种交互作用有助于形成较为温…
64	山中小路尽量沿等高线修建，减小工程量；便于进出人员步行。	1. 为了方便行人行走，小路的坡度被减缓。 2. 小路与等高线平行，因为地形起伏大、坡度大，需要减缓坡度。 3. 这条小路位于我国第二阶级与第三阶级的过程区域，落差大、坡度大。		神农架林区山间小路蜿蜒曲折的主要理由在于地形复杂和植被覆盖的差异。首先，神农架地处我国中部，湖北省西部，是第二阶梯地势向第三阶梯过渡区，地形起伏较大，山脉和山谷交错，形成了多种多样的地形特征。山间地形的变化导致了路线的自然蜿蜒曲折，以适应地形的变化，确保行走安全。 其次，神农架林区的南北坡植被优势种群分布差异较明显，这也影响了山间小路的走向。南坡的植被可能更加茂密，坡度较为平缓，而北坡则可能有更高的坡度和较少的植被覆盖。为了避免滑坡和保护植被，小路可能会在南坡上蜿蜒，减缓坡度的陡峭程度，同时在北坡上采用更为直线的路线，以适应地形的变化。 此外，为了保护生态环境和野生动植物的栖息地，小路设计者可能会考虑到地形的自然走向，避免破坏植被和生态系统。因此，山间小路的蜿蜒曲折不仅是出于地形适应，也是为了保护和维护神农架林区的自然环境。
83	气温升高，冰雪融化，冰债物出露，松散物质增多；冰雪融水量增多，冰湖更易渍决；地表径流量增加，侵蚀和搬运能力增强。	气温升高会导致冰川融化速度加快，进而增加泥石流发生的频率。这是因为冰川融化后的水与冰中的杂质混合形成含有大量泥砂石块的特殊流体，会向河沟冲刷而去。		气温升高对帕隆藏布江流域冰川泥石流发生频率的增加主要体现在以下几个方面： 1. 冰川融化加速：随着气温的升高，冰川的融化速度加快，导致冰川下方的冰雪融水增加，这是冰川泥石流的主要水源之一。融水会侵蚀冰川表面，形成冰川下方的水库，即冰湖。这些冰湖的水量随着融水的不断补给而增加，当冰湖的水量超过冰湖的容量时，冰湖就会溃决，形成泥石流。 2. 冰湖数量和规模的增加：气温升高不仅加速了冰川的融化，还促进了冰湖的形成和扩大。随着冰湖数量和规模的增加，溃决的概率也随之提高，这进一步增加了冰川泥石流的发生频率。 3. 冰川体积的减少：长期的气温升高导致冰川体积的逐渐减少，冰川的稳定性下降，增加了冰川泥石流的发生风险。随着冰川体积的减少，冰川的坡度也可能变得更陡，这会加速泥石流的流速和携带能力。 4. 极端天气事件的增加：气温升高可能导致极端天气事件的频率增加，如强降雨、干旱等，这些极端天气事件可以进一…
90	太行山对黄土高原形成的影响：黄土高原的黄土主要受强盛西北风的搬运作用，从西北内陆吹向东部，由于高大的太行山呈东北一西南走向，对西北风有明显的阻挡作用，大量黄土因风力减弱便堆积在太行山西侧构成黄土高原。太行山对黄土高原分布的影响：由于太行山的阻挡使得黄土不能越过高山，黄土高原仅分布在太行山西侧。	太行山东侧山前发育的典型洪积扇与洪积平原的形成过程主要是由于阻挡了海南季风的水汽，黄土被西北季风吹向东部平原，有利于黄土高原黄土的堆积。同时，阻挡了东南季风的水汽，形成黄土高原干旱少雨的气候，减少黄河水流冲刷流失的情况。		太行山东侧山前形成的典型洪积扇和冲洪积平原是由于山体的侵蚀作用和河流的沉积作用共同作用的结果。洪积扇是由河流在山前平缓的地区沉积大量的泥沙和岩石碎屑形成的扇形地形。这些沉积物主要来自于太行山脉的侵蚀，包括山体的风化、滑坡和径流侵蚀等。 洪积扇的形成过程可以分为以下几个阶段： 1. 太行山脉的侵蚀：山体的风化和径流侵蚀不断地将岩石和土壤侵蚀下来，形成大量的泥沙和碎屑物。 2. 河流的运输：这些泥沙和碎屑物被河流运输到山前平缓的地区。 3. 河流的沉积：当河流到达山前平缓的地区时，由于水流速度减慢，泥沙和碎屑物开始沉积。 4. 形成洪积扇：随着时间的推移，河流的沉积物逐渐积累，形成了一个扇形的地形，这就是洪积扇。 冲洪积平原是洪积扇的进一步发展和演变，它是由河流冲刷和洪水冲积形成的平坦地带。冲洪积平原的形成过程通常包括以下几个阶段： 1. 洪水的冲刷：频繁的洪水会对洪积扇进行冲刷，清除部分沉…
0	由于纵波可以通过固体、液体、气体传播，而横波只能通过固体传播，因此可以根据横波和纵波能否通过各圈层以及波速变化推断地球内部各圈层的物质状态。	地震波随下降深度而传播速度急剧加快，但通过D界面时速度增长变缓，速度继续逐步增长。并逐渐变缓速度增长速率。这种速度变化表明地球内部存在不同性质的圈层物质，因为不同物质密度和弹性模量会影响地震波的传播速度。通过分析地震波在地球内部的传播特点，可以推断出地球内部各圈层的物质状态和性质。因此，利用地震波可以帮助科学家们更好地了解地球内部的结构和组成。			利用地震波判断地球内部圈层物质状态的依据主要包括地震波的传播速度和路径的变化。地震波在不同圈层中传播时会受到不同密度、温度和化学成分等因素的影响，从而导致传播速度和路径的变化。通过观测地震波的传播速度和路径变化，可以推断地球内部圈层的物质状态，比如地幔的结构和性质等。例如，地震波在通过地幔时传播速度会有所减慢，这种减慢的速度可以告诉我们地幔的密度和温度情况。
1	河流径流量大，携带泥沙量大；位于河流入海口，地势低平，流速缓慢，以堆积作用为主，泥沙大量堆积；地处河海交界地带,海潮的顶托使堆积作用增强,在河口地段形成众多的沙洲。	长江口地段多沙洲的自然原因主要是由于长江长期的冲刷和侵蚀作用，导致河床上沉积了大量的沙粒。随着地壳抬升和其他地质作用的影响，这些沙粒最终逐渐堆积形成了略高于水面的小岛，最终形成了长江口地段众多的沙洲。			长江口地段多沙洲的自然原因主要有以下几个方面：首先，长江是我国第一大河流，携带了大量的泥沙从上游冲刷而来，在长江口地段遇到海水的潮汐作用，会形成沉积物，逐渐堆积形成沙洲。其次，长江口地段处于江河与海洋的交汇处，水流速度减慢，泥沙沉积的机会增加，也促进了沙洲的形成。另外，长江口地段的地形地貌也对沙洲的形成起到了一定的影响，比如海浪、潮汐等自然力量会影响沙洲的形成和演变。 举例来说，长江口地段的崇明岛就是一个典型的多沙洲地区，由于长期受长江泥沙的冲击和海水的潮汐作用，崇明岛逐渐形成并不断扩大。这些因素共同作用，导致长江口地段出现了多沙洲的自然现象。
3	盐城等三市经济增长缓慢，吸引外来人口的能力较低；相对地，其他区域经济增长较快，就业机会丰富，导致盐城等市的居民外出务工或经商的人数增多。此外，省内良好的交通条件也方便了人口的流动。	盐城等三市人口增长率为负值的主要原因可能有四个方面：经济发展水平相对落后、科技发展较低、资源枯竭以及城镇化程度相对较低。			盐城等三市人口增长率为负值的主要原因可能包括以下几个方面： 1. 经济发展不平衡：盐城等三市可能面临经济结构调整和产业转型的困难，导致就业机会减少，人口外流或者迁出率增加，从而导致人口增长率为负值。 2. 地理位置不利：盐城等三市可能地理位置偏远，交通不便，基础设施建设滞后，吸引力不足，使得人口流入不足，人口增长受限。 3. 自然环境因素：盐城等三市可能面临自然资源匮乏、生态环境恶化等问题，影响当地生活质量和发展前景，导致人口减少或者外流。 总的来说，盐城等三市人口增长率为负值可能是多种因素综合作用的结果，需要通过政策支持和发展措施来解决。
7	雨巷所处区域的坡度大于晾房，这是因为雨巷地区夏季降水较多，为了加快排水速度，一般会设计较大的屋脊坡度；相比之下，晾房通常位于西北地区，该地区降水较少，因此屋脊坡度较小。	雨巷区域的房屋屋脊坡度较大，主要是因为该地区降水量大，需要较大的坡度来排放屋顶上的雨水。相比之下，晾房地区较干旱少雨，因此无需设置较大的坡度。此外，晾房地区以水果干为特色，需要用平坦的区域使得水果直面阳光，便于晾晒。			雨巷和晾房所在区域房屋屋脊的坡度大小可能存在一定差异。一般来说，雨巷地区的房屋屋脊坡度会相对较大，这是因为雨巷地区降雨量较大，为了防止雨水顺着屋顶滞留，需要设计较大的坡度，以便让雨水快速流下来，减轻房屋承载的压力，防止水渗漏。而晾房所在区域的房屋屋脊坡度相对较小，因为晾房一般是用来晾晒葡萄等农作物的，不需要考虑雨水排放的问题，所以坡度可以设计得相对较小。 举例来说，雨巷地区的海草房由于需要应对大量降雨，通常屋顶的坡度会比较陡峭，以确保雨水迅速排放。而晾房一般并不需要经常面对大量降雨，因此屋脊的坡度可以设计得相对平缓。 。
8	岩石具有透水性和可溶性，降水丰富时，水具有较强的溶解能力和流动性。	要形成喀斯特地貌，首先地形必须是畸岖、陡峭，并且受到流水侵蚀。其次，地质层中含有大量石灰岩也是必不可少的条件。最后，降水发达、气温湿润也是形成喀斯特地貌的重要因素。			喀斯特地貌的形成条件主要包括地质条件和水文条件。地质条件是指地下岩溶岩层丰富、易溶解的岩石地质条件，例如石灰岩、石膏岩等，这些岩石受水的侵蚀容易形成溶洞、地下河流等地貌特征。水文条件是指地下水的丰富程度和活跃性，地下水的运动对岩溶地貌的形成至关重要，它通过溶解、冲蚀、沉积等作用，塑造了喀斯特地貌的独特形态。 举例来说，贵州水城天生桥景区中的天生桥就是由于瀑布冲刷溶洞地形而形成，地下水活跃，加速了岩溶地貌的形成过程，形成了这一独特的景观。
10	该地区多雷电和强降雨天气；位于沿海地带，湿度大，云雾多，能见度较低；由于地处我国东南沿海，受夏季风影响时间长，雨季较长；此外，该地区容易受到台风等灾害的影响。	文昌卫星发射中心发射窗口较窄的原因是因为该地区属于热带季风气候，高温多雨，且靠近海洋，可能会受台风等自然灾害的影响。			回答: 文昌卫星发射中心发射窗口很窄的原因主要是受到当地气象气候条件的影响。文昌地处热带海洋气候区，受季风影响较大，常年有较强的东南季风，造成风向变化频繁，风速较大。这种气候条件下，发射窗口需要考虑风向、风速等因素，以确保火箭发射过程中的安全性。因此，为了避免恶劣的气象气候条件对发射过程造成影响，文昌卫星发射中心的发射窗口较窄。 举例来说，如果发射窗口设计得过宽，可能会因为风向突变或风速突然增大而导致发射风险增加，甚至影响到卫星发射的成功率。因此，为了提高发射的安全性和成功率，文昌卫星发射中心会根据实际气象气候条件设定较窄的发射窗口。 总的来说，文昌卫星发射中心发射窗口较窄的原因是为了充分考虑当地气象气候条件对发射过程的影响，确保发射的安全性和成功率。
11	贵州省地形崎岖，主要是喀斯特地貌，地形成形缓慢，土层薄，降水丰沛导致流水侵蚀作用强，土壤易流失。地下多溶洞和裂隙，地表水下渗多，导致地表缺水。	贵州省生态环境十分脆弱的原因主要有四个：其一，贵州属于喀斯特地貌，地势起伏，地形复杂；其二，水土流失严重，土地资源受到严重损耗；其三，贵州省平原少，大部分地区为山地，容易受到自然灾害的影响；其四，地形崎岖，交通不便，给生态环境保护和修复带来一定困难。			贵州省生态环境十分脆弱的原因主要包括以下几个方面： 1. 喀斯特地貌：贵州高原为喀斯特地貌，地表岩溶作用强烈，地下水系统发育，容易形成地下溶洞和地表塌陷等地质灾害，对生态环境造成破坏。 2. 多山地形：贵州省地势复杂，多山地形，山地林地占比高，易发生山体滑坡、泥石流等自然灾害，对生态环境造成严重影响。 3. 植被覆盖不足：部分地区植被覆盖率较低，土壤侵蚀严重，导致土地沙化和水土流失，加剧了生态环境的脆弱性。 4. 气候变化：贵州高原昼夜温差大，水热条件不稳定，气候变化频繁，对植被生长、动植物繁衍等生态环境因素产生影响。 综上所述，贵州省生态环境之所以十分脆弱，主要是受地貌、地形、植被覆盖以及气候变化等因素共同影响所致。 。
15	主要收入归还村合理分配收益，兼顾公平和效率，利于乡风和谐，减少矛盾；通过智力援助，提升村民的文化水平和技能。	优势：村集体企业主导的旅游开发模式有利于发挥本地独特文化的作用，激发了村民的服务热情，给游客更好的体验感。同时，这种模式发掘了村民的导游作用，引导游客更好地游览项目。此外，这种模式有利于保护哈尼传统文化，将天然旅游优势转化为经济优势。			阿者科村实行村集体企业主导的旅游开发模式有以下优势： 1. 保护哈尼传统文化：通过村集体企业主导的开发模式，村民可以更好地保护和传承自己的传统文化，不会被外来资本的影响改变原有的生活方式和文化习俗。 2. 增加村民收入和改善生活水平：通过村集体企业的经营，村民可以获得更多的分红，增加收入，改善生活水平，有利于减少贫困落后状况。 3. 增强村民主人翁意识：村集体企业的经营让村民更加参与和关注村子的发展，增强他们的主人翁意识，更有动力和积极性去保护和发展村子的传统文化和遗产。 4. 提高当地旅游业发展水平：通过村集体企业的经营，可以提高当地旅游业的发展水平，吸引更多的游客前来，促进当地经济的发展。 5. 社会效益和经济效益兼顾：村集体企业经营的模式不仅能带来经济效益，还能带来社会效益，有利于村民和整个村子的长远发展。
19	辽宁省毗邻渤海和黄海，具有漫长的海岸线和丰富的海洋渔业资源，地理位置紧靠京津冀都市圈和东北地区，消费市场广阔，海洋捕捞业历史悠久且船舶制造技术先进，国家政策支持海洋牧场和国家级海洋牧场示范区的建设，从而促进了渔业经济的发展。	辽宁省的渔业生产区位熵明显高于其种植业、畜牧业、林业等其他农业部分的主要原因是位于沿海地区，渔业发展优势大。这里有广阔的浅海大陆架，发展规模大；海水温度适宜，适合鱼类生长；同时，饵料丰富，海水上浮游生物多，满足了食物需求。			辽宁省渔业区位熵高于其他农业部分的主要原因可能是由于辽宁省具有较长的海岸线和丰富的海洋资源。作为一个沿海省份，辽宁省拥有广阔的海域，适宜于各种渔业资源的生长和繁衍，例如各类海鱼、贝类、虾类等。这些海洋资源的丰富，使得辽宁省在渔业领域具有较大的比较优势，也使得其渔业生产的专业化程度较高，区位熵相对较大。 举例来说，辽宁省拥有辽河口、渤海湾等重要的渔业渔场，这些地区的水域适宜于各类渔业资源的生长，为渔业生产提供了良好的环境条件。此外，辽宁省在渔业方面也有较为完善的生产体系和技术支持，使得其渔业生产更加高效和专业化。 总而言之，辽宁省渔业区位熵高的主要原因是其丰富的海洋资源、优越的地理位置和较为完善的生产体系。这些因素共同作用，使得辽宁省的渔业在农业部分中表现出较高的专业化水平和比较优势。
24	金矿开采产生的不利影响包括大量废水、废渣的排放，造成水污染、大气污染和土壤污染，破坏了地表形态和矿区植被，导致水土流失、滑坡、坍塌等现象频发，开采和矿渣堆放释放的大量污水和有毒物质严重污染了海洋环境，破坏了海洋生物群落的生存环境，减少了生物多样性，措施包括提高技术和设备水平，减少金矿开采过程中产生的废水、废渣、废气，采取综合措施治理矿区环境污染问题，加大矿山地质环境保护执法力度，加强矿区生态环境保护，对矿区土地复垦和整治，提高被破坏土地的利用率和植被覆盖率，对采空区进行填充，减少地表沉降塌陷，利用地理信息技术加强对矿区的环境监测。	不利影响：推测瓦图科拉金矿开采对维提岛地理环境的不利影响包括：破坏当地生态环境，因岛屿自我调节能力不强；植被覆盖率减少，易导致水土流失；河流中流入大量矿物质，易使水体富营养化；大量金矿被采，易使地面沉降。 措施：为减轻这些不利影响，可采取以下措施：合理有效地对资源开发利用；施行植物工程等措施，多植树造林；宣传保护环境，提高环境保护意识；政府出台相关政策并加强监管和约束。			瓦图科拉金矿的开采对维提岛地理环境可能产生的不利影响包括土地破坏、水资源污染、空气污染等问题。开采过程中可能会导致土地裸露，植被破坏，造成土壤侵蚀和水土流失。同时，开采过程中使用的化学物质和有害废弃物可能会污染当地水资源，对生态系统造成破坏。另外，开采过程中释放的粉尘和废气可能导致空气污染，对当地居民的健康构成威胁。 为减轻这些不利影响，可以采取一些措施，如加强环境监测和管理，制定严格的环境保护法规和措施，确保开采过程中的环境影响得到有效监测和控制。同时，可以推行绿色采矿技术，减少化学品的使用和废弃物的排放，提高资源利用率，降低对环境的影响。此外，可以加强社会责任投资，开展环境修复和生态保护工作，以缓解开采对当地生态系统的破坏，并为当地居民提供更好的生活环境。 。
40	南支天山南坡处于西风带背风坡，降水较少；南支天山南坡处于阳坡，太阳辐射强，土壤水分蒸散量大，含水量少，不能满足云杉林生长的水分需求，因此未出现云杉林。	南支天山南坡缺失云杉林的原因主要有三个：首先，南支天山的纬度较北支天山低，这不利于云杉的生长；其次，南支天山南坡的海拔较低，也不利于云杉的生长；最后，由于人类不合理的采伐，导致了云杉林的减少。			南支天山南坡缺失云杉林的原因可能是由于气候和环境因素的影响。南支天山南坡地处低纬度地区，受到暖湿气流的影响，相对来说气温较高，降水较多，这些条件并不适宜云杉的生长。云杉通常生长在海拔较高的地区，对温度和湿度有一定的要求，南支天山南坡的气候条件可能并不符合云杉的生长需求。此外，南支天山南坡地形复杂，地势陡峭，土壤贫瘠，这也会对云杉的生长产生不利影响。 举例来说，南支天山南坡的昼夜温差可能较大，这种气候条件并不适合云杉的生长，云杉更适合生长在气温较为稳定的高海拔地区。另外，南支天山南坡的降水量可能过多或不均匀，也会对云杉的生长造成影响。总体来说，南支天山南坡的气候和环境条件并不适合云杉的生长，这可能是造成缺失云杉林的主要原因。 。
41	从南到北，云杉林带所处的纬度逐渐升高，热量逐渐减少；从西到东，云杉林带的年降水量逐渐减少；受热量和降水的共同影响，从西南向东北，云杉林带的生物量逐渐降低。	分析表明，西南向东北天山云杉林带生物量呈降低趋势的原因有三点。首先是由于纬度逐渐提高，植物在东北地区获得的太阳辐射较少，不利于光合作用，从而阻碍了生长。其次，西南地区与东北地区在地形和气候条件上存在较大差异，西南地区水热条件充足，生长环境适宜，而东北地区气候干燥，不利于云杉林的生长。最后，西南地区处于谷地，水源条件优越，而东北地区水源大渗严重，土壤中水分含量低，肥力差，也限制了云杉林的生长。			天山云杉林带生物量自西南向东北呈降低趋势可能受到多种因素的影响。其中，主要原因可能包括以下几点： 1. 气候因素：随着海拔的升高，气温会逐渐降低，降雨量和光照强度也会有所减少，这些气候条件不利于植物的生长和生物量的积累。 2. 土壤质量：随着海拔的增加，土壤的质量和肥力可能会逐渐减弱，导致植物吸收养分和水分的能力下降，从而影响了生物量的积累。 3. 物种竞争：在高海拔地区，植被种类可能更加单一，不同植物物种之间的竞争会加剧，导致生物量减少。 4. 人为活动：人类的开发活动、砍伐和放牧等行为也会对天山云杉林带的生态环境造成影响，进而导致生物量的降低。 综上所述，天山云杉林带生物量自西南向东北呈降低趋势可能是气候、土壤质量、物种竞争以及人为活动等多种因素综合作用的结果。 。
61	问题包括水资源匮乏和资金短缺；技术力量不足。措施包括在高原修建水库与水坝，实现雨水的季节调配；培养农业技术人员；推广喷灌与滴灌等节水灌溉技术；加强国际合作，解决资金短缺困难等。	主要问题：厄立特里亚的农业发展面临着两大主要问题，一是平原地区降水稀少，淡水资源匮乏；二是位于较低纬度，光照强度大，蒸发量大。 措施：为了解决这些问题，厄立特里亚可以采取一系列措施。首先，推动发展节水农业，推广滴灌技术和地膜的使用，有效利用有限的水资源。其次，引入海水淡化技术，将淡化后的海水用于灌溉农田，缓解淡水资源短缺问题。第三，针对丘陵地区，发展林业，对平原地区则发展畜牧业，实现资源合理配置。最后，加强生态保护工作，推行轮牧轮植，预防土地荒漠化，保护农业生产环境的可持续发展。通过这些措施的实施，可以促进厄立特里亚农业的可持续发展，提高农业生产效率，保障粮食安全。			厄立特里亚农业发展面临的主要问题包括气候干旱、降水量不稳定、农业生产技术落后、粮食不能自给等。为了解决这些问题，厄立特里亚可以采取一些措施，比如推广现代化的灌溉方式，如喷灌、滴灌，提高农业生产效率；加强农业科技研究和人才培养，提高农业生产技术水平；引进适合干旱气候的抗旱作物品种，提高农产品产量和质量；加强国际合作，吸引外资和技术支持，促进农业现代化。通过这些措施，厄立特里亚可以逐步解决农业发展中所面临的问题，实现农业产业的可持续发展。
62	沙特阿拉伯降水少，大部分地区为无流区，水资源严重不足；但该国油气资源丰富，能源充足，并大量出口油气创汇，经济实力强；同时该国人口少，人均国民收入高，有雄厚的财力支持海水淡化来缓解生活用水不足的问题。	沙特阿拉伯重视海水淡化的原因主要包括以下几点：首先，沙特阿拉伯的气候干热，大部分地区都是沙漠，缺乏淡水资源，因此需要进行海水淡化来解决水资源短缺问题。其次，沙特阿拉伯经济发达，有充足的资金用于投入海水淡化项目，确保水资源供应。再者，沙特阿拉伯靠近海洋，便利于引海水进行淡化处理。此外，沙特阿拉伯作为一个石油工业大国，拥有丰富的能源资源，可以保障海水淡化所需的能源消耗。因此，沙特阿拉伯重视海水淡化是基于国家的水资源需求和经济实力等多方面考量。			沙特阿拉伯重视海水淡化的原因有以下几个方面： 首先，沙特阿拉伯是一个干旱缺水的国家，大部分地区缺乏淡水资源。海水淡化可以有效地解决这一问题，为居民提供稳定的饮用水和用水。因此，海水淡化在改善人民生活水平和保障国家水资源安全方面具有重要意义。 其次，沙特阿拉伯作为一个以石油为主要经济支柱的国家，石油资源丰富但淡水资源稀缺。海水淡化可以为石油开采和加工提供所需的水资源，保障石油产业的顺利运转，进而促进经济的发展。 此外，沙特阿拉伯拥有丰富的海水资源，海水淡化技术成熟，可以更有效地利用这一资源。通过海水淡化，沙特阿拉伯可以提高海水资源的利用率，减少对地下水和其他淡水资源的依赖，实现水资源的可持续利用。 总的来说，沙特阿拉伯重视海水淡化是为了解决国家的水资源短缺问题，保障经济的可持续发展，以及提高海水资源的利用效率。
63	地势从南向北、自西向东趋缓；地形起伏较大，复杂崎岖；地貌类型多样，多山间河谷发育。	神农架林区的地形主要是山地和高原，地势起伏较大，整体呈现出中间高，东西低的特点。			神农架林区的地形地势特征主要包括以下几点：首先，神农架林区位于我国中部，地势为第二阶梯向第三阶梯的过渡区，最高峰为神农顶，海拔高达 3 105.4 米，整体地势较高。其次，该地区面积约 3253 平方千米，地形复杂多变，包括山地、丘陵、高原等地貌类型。再者，神农架林区年均气温较低，为 11.0~12.2℃，年均降水量约 1 219.93 毫米，且4~10月降水量占全年的70%，表明降水季节明显集中。此外，神农架南北坡植被优势种群分布差异明显，反映出地形地势对植被生长的影响。总的来说，神农架林区地形地势特征复杂多样，气候条件独特，是一个典型的山地地区。
64	山中小路尽量沿等高线修建，减小工程量；便于进出人员步行。	1. 为了方便行人行走，小路的坡度被减缓。 2. 小路与等高线平行，因为地形起伏大、坡度大，需要减缓坡度。 3. 这条小路位于我国第二阶级与第三阶级的过程区域，落差大、坡度大。			神农架林区地势复杂，山高谷深，地形起伏大，因此山间小路蜿蜒曲折。这主要是由于以下几个原因： 1. 地势复杂：神农架林区地处地势第二阶梯向第三阶梯的过渡区，地形复杂多变。山势起伏大，山坡陡峭，沟壑纵横，导致道路需要蜿蜒曲折以适应地形的变化。 2. 植被茂密：神农架林区植被茂密，森林覆盖率高，道路需要顺应自然环境，绕过树木和植被，因此走势曲折。 3. 降水量大：神农架林区年均降水量较大，4~10月降水量超过全年70%，容易形成沟壑和山谷，道路需要绕过这些地形特征，使路线变得蜿蜒曲折。 4. 生态保护：神农架林区是国家级自然保护区，为了保护当地的生态环境，修建道路时需要考虑尽量减少对自然环境的破坏，因此道路设计会更加曲折。 举例来说，如果直线穿过山脉，可能会破坏当地的植被和生态环境，因此设计道路时会选择蜿蜒曲折的方式，绕过重要的生态区域。 总的来说，神农架林区山间小路蜿蜒曲折的主要原因是地形复…
71	多海湾，风浪小；浅海大陆架，水域浅；入海河流带来大量泥沙。	荷兰围海造陆的优势自然条件包括：濒临海洋且地形成袋状，便于施工；海拔相对较浅。			荷兰围海造陆的优势自然条件主要体现在以下几个方面： 1. 地势低洼：荷兰地势低洼，有大量的海域可以利用进行围海造田，这为荷兰创造了围海造陆的天然条件。 2. 海拦海大坝：荷兰修建了长达30千米的须德海拦海大坝，这种工程设施在其他国家可能不容易实现，而荷兰正是利用这种大坝来开垦新土地。 3. 投入大量风车进行围海造田：荷兰投入了大量的风车进行围海造田，这种独特的方式也是荷兰围海造陆的一个优势条件。 4. 地势适宜：荷兰近四分之一的土地低于海平面，仅三分之一的地面高出海平面一米，其余地区海拔多在10-30米之间，这种地势适宜也为围海造陆提供了条件。 总的来说，荷兰围海造陆的优势自然条件主要在于地势低洼、海拦海大坝、投入大量风车进行围海造田以及地势适宜等方面。这些条件使得荷兰能够利用自然资源进行围海造陆，从而创造出大量的新土地来支持国家的发展。
73	提供水源；创造了大量的土地资源或扩大了陆地（国土）面积；提升了艾瑟尔湖两岸的交通通达度。	须德海拦海大坝的建成使荷兰填海造陆区域形成了淡水湖，为当地提供了更多的生活用水和工业用水，推动了生活水平和工业水平的提升。同时，大坝的建成稳定了填海造陆区的自然环境，促进了当地的经济发展。此外，大坝还促进了交通的稳定与发展。			须德海拦海大坝的建成对荷兰填海造陆区域经济发展起到了积极作用。首先，大坝建成后开垦出的新土地为荷兰创造了更多的发展空间，超过1700平方千米的新土地可以用于农业、工业、物流等领域的发展，促进了当地经济的增长。其次，大坝上修建的双向4车道高速公路为当地的交通运输提供了便利，加快了货物流通速度，促进了当地物流业的发展。最后，填海造陆区域的发展也吸引了大量的投资和企业进驻，带动了当地就业机会的增加，提高了居民的生活水平。 举例来说，弗莱福兰省作为荷兰最年轻的省份，正是由于填海造陆而发展起来的。这个省份拥有现代化的物流设施和便捷的交通网络，吸引了大量的跨国物流企业在此设立分支机构，促进了当地经济的蓬勃发展。 总的来说，须德海拦海大坝的建成为荷兰填海造陆区域经济的发展带来了积极的影响，推动了当地经济的多元化发展和国民经济的持续增长。 .
74	地理位置优越（面向大海，背靠欧洲大陆，位于莱茵河入海口）；经济腹地广，服务范围大；水陆交通发达；政府重视，政策扶持；科技水平高；专业化程度高；完善的金融等配套服务产业。	荷兰能够成为欧洲现代物流业中心的主要原因有以下几点：首先，荷兰综合国力强盛，复合型产业发展较快，这为物流业提供了良好的发展环境。其次，政府对物流业的支持力度大，为行业发展提供了政策和资金支持。再者，荷兰在全球物流产业中占有重要比重，具有较强的竞争力。此外，物流产业是荷兰国民经济的重要支柱之一，得到了政府和企业的高度重视和投入。最后，荷兰交通便利，市场广阔，为物流业的发展提供了便利条件，使其成为欧洲现代物流业中心。			荷兰能够成为欧洲现代物流业中心的主要原因包括以下几点： 1. 地理位置优越：荷兰位于欧洲大陆的中心，拥有发达的水路和陆路交通网络，便于连接欧洲其他国家和地区。其主要港口鹿特丹港是欧洲最大的港口之一，是欧洲重要的物流枢纽。 2. 先进的基础设施：荷兰拥有世界领先的港口、铁路、公路、水运等基础设施，便于货物的快速流通和分拨。 3. 开放的经济政策：荷兰政府实施开放自由的经济政策，吸引了大量跨国物流企业在荷兰设立分支机构或总部，促进了物流业的发展。 4. 先进的物流技术：荷兰拥有先进的物流技术和管理经验，如自动化仓储系统、物流信息系统等，提高了物流效率和服务质量。 5. 优质的人才资源：荷兰拥有高素质的物流从业人员和管理人才，他们具有专业知识和国际视野，能够适应快速发展的现代物流业。 综上所述，荷兰之所以能够成为欧洲现代物流业中心，是由于其地理位置、基础设施、经济政策、物流技术和人才资源等多方…
75	沿海滩涂资源丰富，可供养殖多种水产品；河流水量充沛，为牡蛎养殖提供了充足的水源；淡咸水交汇，水质肥沃，有利于牡蛎生长；靠近市场，交通便利，可以方便地运输和销售产品；政府支持，劳动力充足，资金雄厚，有利于牡蛎养殖业发展。	沿海地区牡蛎养殖业发展的有利条件包括：沿海滩涂资源丰富，养殖各类水产品有助于减少水资源浪费和提高利用率，促进农业可持续发展；淡咸水交汇，水质肥沃，有利于牡蛎生长；河流低潮位放水，扩大淡水影响范围，为牡蛎提供更好的生长环境；邻近市场，交通便利，便于运输和销售产品；政府支持，劳动力充足，资金雄厚，有利于促进牡蛎养殖业的发展。			(1) 该沿海地区具有丰富的滩涂资源，适宜牡蛎生长。滩涂环境提供了丰富的浮游生物作为牡蛎的食物来源，有利于牡蛎生长和繁殖。 (2) 水域内有适量淡水注入，符合牡蛎的生长环境要求。淡水的注入可以稀释盐度，提供适宜的生长条件。 (3) 邻近的河流流域面积广，水量充沛，上游水库的放水时间安排在夜间，有利于调节水质和水温，符合牡蛎的生长需求。 (4) 牡蛎具有食用和药用价值，市场需求大，发展潜力巨大。 (5) 当地政府和企业重视牡蛎养殖业的发展，投入资金和技术支持，促进了行业的健康发展。 举例：比如，当地政府出台了相关政策，支持企业发展牡蛎养殖业，提供了优惠政策和资金支持，引导农民转变种植方式，推动了牡蛎养殖业的快速发展。 。
77	随着牡蛎养殖业的不断发展，牡蛎数量急剧增加，同时牡蛎的生存空间变得越来越小，食物来源也变得十分有限；此外，河流上游修建了水库，水库在夜间放水，导致河流入海的淡水含量增加。	近年来，随着牡蛎养殖业的迅速发展，牡蛎数量急剧增加，导致牡蛎生存空间变小，食物来源减少。同时，靠近河流的地区为工业提供必要的生产和生活用水，也对牡蛎的生长造成影响。			近年来牡蛎个头变小的原因可能有多方面的因素导致。首先，可能是由于过度捕捞和养殖密度过高导致资源过度利用，牡蛎在有限的空间内竞争激烈，使得个体生长受到限制。其次，水库在夜间放水可能会导致水体中的氧气含量减少，影响了牡蛎的呼吸和新陈代谢，限制了其生长发育。另外，可能还存在水质污染、气候变化等因素，也会对牡蛎的生长产生负面影响。 举例来说，水库在夜间放水可能造成水流速度加快，导致牡蛎在摄取营养物质时受到影响，影响其正常生长。另外，过度捕捞和养殖密度过高也会导致牡蛎个头变小，因为资源的过度利用会使得牡蛎的生存环境受到破坏，无法获得充足的营养和空间。 总的来说，牡蛎个头变小的原因是多方面的，需要综合考虑和解决。可以通过科学合理的养殖管理措施，加强环境保护和监测，以及引入新的养殖技术等方式，来促进牡蛎的健康生长，保护牡蛎资源的可持续发展。
78	自然原因方面该地区黄土质地疏松，易受雨水冲刷；地形起伏大，坡度陡峭加剧了水土流失；降水集中且多，暴雨侵蚀作用强烈；人为原因方面，过度开垦和过度放牧等不合理的土地利用破坏了地表植被，加剧了水土流失。	黄土高原地区水土流失严重的主要原因包括黄土质地疏松易受雨水冲刷、人口密集经济发达对水资源需求大、地形起伏大坡度陡峭加剧水土流失等因素。然而，梯田的修建可以改变坡面微小地形，有助于减少水土流失。降水多且暴雨强，对侵蚀作用加剧，夜间气温低蒸发弱，水库放水损失较小。此外，过度开垦与过度放牧等不合理的土地利用也会加剧水土流失。			黄土高原地区水土流失严重的主要原因包括以下几点：首先，该地区地形起伏大，土壤贫瘠，降水不足，植被覆盖度低，易发生水土流失。其次，长期以来的过度人为开发，如过度砍伐植被、过度耕种等，破坏了土壤结构，加速了水土流失的发生。再者，陡坡耕地面积较大，耕种方式传统，缺乏科学的水土保持措施，也导致了水土流失的加剧。最后，气候变化等自然因素的影响也使得该地区水土流失问题更加严重。
82	有利影响包括喀斯特地貌景观独特，是良好的旅游资源，有利于发展旅游业；地下水资源丰富。不利影响包括地表崎岖，地质条件复杂，不利于交通建设；交通不便，不利于对外经济文化交流；岩层不稳定，不利于水利工程建设；耕地面积小且分散，土层薄，不利于发展农业；岩石裂隙发育，地表水资源短缺；保水性差，易造成水土流失；岩石裸露，易出现石漠化现象；生态环境脆弱。	对于喀斯特地貌广布对当地地理环境的影响，有利的方面包括：首先，喀斯特地貌适合重大工程选址；其次，地势奇特，拥有丰富的旅游资源；第三，喀斯特地区地下水资源丰富。然而，不利的方面也存在：首先，地表蓄水能力较差，地表水资源匮乏；其次，地势复杂，交通不便；第三，土壤浅薄贫瘠，不利于农业生产。			喀斯特地貌广布对当地地理环境的影响主要表现在以下几个方面： 1. 地下水资源丰富：喀斯特地貌中的溶洞、地下河等地下水系统丰富，为当地提供了丰富的地下水资源，满足了人们的日常生活用水需求。 2. 地表水资源丰富：喀斯特地貌中的地表水系统发育，包括河流、湖泊等水体，为植被生长和动物生存提供了必要的水源。 3. 生态环境保护：喀斯特地貌中的溶洞、地下河等特殊地质景观成为了生物多样性的重要栖息地，对当地的生态环境保护起到了积极的作用。 4. 旅游资源丰富：喀斯特地貌中的地下溶洞、天生桥等景观吸引了大量游客前来观赏，促进了当地旅游业的发展，带动了当地经济的增长。 5. 地质灾害风险：喀斯特地貌中容易发生地质灾害，如地下水溶蚀导致地表塌陷、溶洞坍塌等现象，对当地的基础设施和居民安全构成一定的风险。 综上所述，喀斯特地貌广布对当地地理环境既带来了丰富的资源和旅游机会，同时也需要加强对地质灾害的防范和治…
85	合理交通方式为陆海联运；因为长距离海运费用较低，节约运输成本。相比铁桶运输，使用集装箱液袋运输转运方便，只需单程运输，节约运输费用；液袋可充分利用集装箱的空间，装载量大（具有规模运输优势）。	将毛油由铁岭运输到广州精炼油生产基地，水路运输是一个合理的选择。水路运输沿海滨城市，能够承载更多的货物，从而节约运输成本。相比于铁桶运输，使用集装箱液袋运输有更多优势。集装箱液袋能够节约集装空间，装载更多的毛油，同时也更安全、高效，节省装载时间。此外，集装箱液袋方便处理和卸货，为运输过程提供了便利。			推测将毛油由铁岭运输到广州精炼油生产基地的合理交通方式可能是通过铁路运输。铁路运输相对于公路运输更为经济、环保且效率更高，因为铁路运输可以一次性运输大量的货物，减少了运输成本和时间。同时，铁路运输也更为稳定和安全，能够保证毛油的质量不受损失。 使用集装箱液袋运输相对于使用铁桶运输的优势在于： 1. 成本更低：集装箱液袋是一次性使用的软体包装容器，相比起铁桶，集装箱液袋的成本更低，可以降低包装费用。 2. 环保更好：集装箱液袋可以重复利用，减少了废弃物的产生，符合现代环保理念。 3. 运输效率更高：集装箱液袋可以一次性装载更多的货物，减少了装卸货物的次数，提高了运输效率。
88	冬夏季节风力大，风力搬运作用强；夏季盛行偏东风，冬季盛行偏北风，风向常年稳定少变；海滩面积广，为沙堆发育提供沙源；海岸生长着草丛沙生植物，起到减风、固沙作用，有利于沙堆的形成等。	1. 东海岛位于海边，海风强劲。 2. 该岛位于砂质海滩，沙粒丰富。 3. 草丛在这里生长茂盛。 4. 东海岛受季风影响，冬季偏北风盛行，与草丛方向大致相同，有利于草丛沙堆的形成。			草丛沙堆的形成受到多个有利条件的影响。首先，海滩后缘的高大海岸沙堤为草丛提供了一个相对稳定的生长环境，阻挡了海风的侵蚀，使得草丛得以长时间生长并固定沙丘。其次，东海岛夏季盛行偏东风，这种风向有利于将沙粒吹向沙堤，进一步增加沙堆的高度和规模。此外，老鼠书和老鼠节草是优良的海边固沙植物，它们的根系能够有效地固定沙土，防止沙丘被风吹散。因此，东海岛的地理位置、气候条件以及植被种类都为草丛沙堆的形成提供了有利条件。 举例来说，类似于东海岛地理位置的其他海岛或沿海地区，如果具有相似的高大海岸沙堤、适宜的气候风向和固沙植被，也有可能形成类似的草丛沙堆。这些有利条件共同作用，促使了草丛沙堆在东海岛这一地区的形成和发展。 。
89	先形成蝌蚪形老鼠艻沙堆，后形成锥形老鼠苏沙堆。理由：发育初期的老鼠艻以匍匐生长为主，风沙沿下风向在植被后方拖出细长的尾巴，形成蝌蚪形老鼠芳沙堆；老鼠芳继续生长，形成草丛，拦截沙物质使沙堆不断增高，形成锥形老鼠艻沙堆。	先形成蝌蚪形老鼠节沙堆，后形成锥形老鼠节沙堆。蝌蚪形老鼠节沙堆比较矮，容易形成，而沙粒在风力作用下遇到草丛阻力后会先形成较长的蝌蚪形。而锥形老鼠节沙堆堆积的时间较长，且比较高。			蝌蚪形老鼠节沙堆是在锥形老鼠节沙堆之后形成的。这是因为在海滩上，风力作用下的沙粒会被海边固沙植物-老鼠书阻拦，形成老鼠节草丛沙堆。由于风的方向是夏季盛行偏东风，老鼠书生长在沙堤东部，所以在风力作用下，沙粒会首先被阻拦在老鼠书的位置，形成蝌蚪形老鼠节沙堆。而在蝌蚪形老鼠节沙堆的后方，沙粒继续受到风力作用，堆积在老鼠书的后方形成锥形老鼠节沙堆。
90	太行山对黄土高原形成的影响：黄土高原的黄土主要受强盛西北风的搬运作用，从西北内陆吹向东部，由于高大的太行山呈东北一西南走向，对西北风有明显的阻挡作用，大量黄土因风力减弱便堆积在太行山西侧构成黄土高原。太行山对黄土高原分布的影响：由于太行山的阻挡使得黄土不能越过高山，黄土高原仅分布在太行山西侧。	太行山东侧山前发育的典型洪积扇与洪积平原的形成过程主要是由于阻挡了海南季风的水汽，黄土被西北季风吹向东部平原，有利于黄土高原黄土的堆积。同时，阻挡了东南季风的水汽，形成黄土高原干旱少雨的气候，减少黄河水流冲刷流失的情况。			洪积扇是指由河流在山脚下堆积而成的三角形扇形地带，是由于河流在山脚下流速减慢而携带的泥沙沉积在此处形成的。在太行山东侧，由于山脉相对高差大，河流在山脚下受到阻碍流速减慢，沉积物沉积在此处形成了典型的洪积扇。而洪积平原是指在洪水时期河流冲刷出来的平坦河床，由于太行山地形复杂，洪水在山脚下冲刷出来的河床形成了冲洪积平原。这些洪积扇和冲洪积平原的形成过程都是由于太行山地形对河流流速和沉积物携带的影响而形成的。。
91	太行山区地形崎岖，山区的洪流携带大量泥沙流出太行山东侧山口处，因地势变缓，流速降低，水流搬运能力减弱，河水挟带的泥沙便大量堆积形成洪积扇，多个洪积扇相连形成了洪积平原。	太行山东侧山前发育的典型洪积扇与洪积平原的形成过程是这样的：黄河水中含有大量泥沙，当泥沙沉积时，就形成了广阔的洪积平原。而太行山东部地势较为陡峭，是迎风坡，容易形成地形雨，降水形成河流，流水不断侵蚀，最终形成了壮观的洪积扇。			太行山东侧山前发育的典型洪积扇与洪积平原的形成过程主要是由于山地的断层构造和地质作用导致的。当山地发生地震或者其他地质活动时，山体内的岩石会破碎并经过风化、侵蚀等过程，形成大量的碎石、泥沙等物质。这些物质随着重力和水流的作用，沿着山坡向下流动，并在山脚堆积形成洪积扇。而在洪水等自然灾害的影响下，洪积扇上的泥沙会被冲刷到山脚下，逐渐形成平坦的洪积平原。 举例来说，太行山东侧的黄河流域就是一个典型的洪积扇和洪积平原地区。黄河在太行山脉东侧冲积出大量的泥沙，形成了宽阔的洪积平原，对周边地理环境产生了重要影响。 。
92	溪流上游，落差大，流速快，侵蚀作用强，下切形成狭长谷地；受风沙活动影响，沙丘阻塞河道而形成堰塞湖。	由于黄沙的阻隔，原本的水流被迫停滞，不断的侵蚀着周围的地形。随着时间的推移，水流不断地汇聚，最终形成了壮丽的大漠天池。			大漠天池的形成过程可能与地质构造、气候变化等多种因素有关。首先，裂隙发育的花岗岩崖壁可能是由于地壳运动造成的地质构造活动，形成了崖壁陡峭的地形。其次，随着气候的变化，可能曾经有过大量的降水，使得潭水形成。由于大漠天池位于两个不同高度的地形之间，可能存在地形梯度，导致了水体的高差。此外，可能大漠天池周围地势低洼，使得大漠天池成为了一个自然的水体集水区。综合以上因素，大漠天池的形成可能是多种地质、气候等因素综合作用的结果。
97	黄土高原地区的能源开发对经济发展起到了积极作用，因为能源开发提供了丰富的资源为当地经济的发展奠定了牢固的物质基础。此外，能源产业的发展不仅促进了相关产业的繁荣，如交通运输、机械制造等，还为当地创造了更多的就业机会。同时，能源开发还带动了周边地区的基础设施建设和社会事业发展，推动了区域经济的整体进步。	因此，黄土高原地区的能源开发不仅提供了物资保障，也促进了相关产业的发展，创造了更多的就业机会，推动了经济的进一步发展。			黄土高原地区作为我国重要的能源基地，能源开发对经济发展的积极作用主要体现在以下几个方面： 首先，能源开发带动了当地的产业发展。通过开发煤矿、石油和天然气资源，促进了相关产业的发展，如煤炭加工、石油化工等，进而带动了区域经济的增长。 其次，能源开发为当地提供了大量就业岗位。能源产业的发展需要大量的人力资源，因此能够吸纳大量的就业人口，有助于解决当地的就业问题，提高居民的收入水平。 再次，能源开发增加了地方政府的财政收入。通过资源开发所得的税收和利润可以用于地方基础设施建设、教育医疗等公共事业，促进了当地经济的发展。 总的来说，黄土高原地区能源开发对经济发展起到了积极作用，促进了当地经济的增长和就业机会的增加。 。
98	黄土高原地区实施生态环境治理措施取得了积极的效果。这些措施有效地改善了当地的生态环境，减轻了水土流失的程度，提高了土地的质量，从而有利于农业生产和生态恢复。生态移民等措施可以减轻当地的人口压力，有助于缓解人地矛盾，促进可持续发展。然而，这些措施也带来了一些社会经济问题，如移民安置、就业转型等等。这些问题需要政府和社会各界的共同努力解决。	在黄土高原地区实施生态环境治理措施的影响中，防沙治沙工程发挥了重要作用。这些措施有效改善了当地的生态环境，降低了水土流失程度，提升了土地质量，对农业生产和生态恢复都是有利的。同时，生态移民等措施也有助于减轻当地人口压力，缓解人地矛盾，推动可持续发展。另外，积极参与环保活动，如植树造林和环保宣传，可以提高社会对气候变化的关注度和行动力。			黄土高原地区实施生态环境治理措施的影响是双重的。一方面，这些措施有效地改善了当地的生态环境，减少了水土流失、提升了植被覆盖率，提高了生态系统的稳定性。这对于保护当地的生态环境、维护水资源的可持续利用具有积极的作用。另一方面，生态环境治理措施也带来了一些社会经济问题，比如实施退耕还林政策可能导致农民收入减少，生态移民可能面临就业问题等。因此，在实施生态环境治理措施时，需要综合考虑生态环境和社会经济的平衡，采取更加科学、可持续的发展方式。 举例来说，退耕还林政策虽然能够减少水土流失，但也会影响当地农民的种植收入。为了解决这个问题，可以引入新的农业种植方式或者发展生态旅游等产业，为当地农民提供新的经济来源。这样既能保护生态环境，又能解决农民的经济问题。 。
8	岩石具有透水性和可溶性，降水丰富时，水具有较强的溶解能力和流动性。			喀斯特地貌的形成条件主要是由于地下水的侵蚀作用。这种地貌通常出现在含有溶石盐岩石的地区，如石灰岩等。地下水会溶解岩石中的矿物质，逐渐形成一系列的溶洞和裂隙。随着时间的推移，这些溶洞和裂隙会逐渐扩大，形成独特的喀斯特地貌特征，如洞穴、峡谷、天生桥等。 在贵州省水城天生桥的例子中，瀑流沿山谷裂隙冲蚀而成的天生桥，正是喀斯特地貌形成条件的典型体现。这里的石灰岩地层被地下水侵蚀，形成了独特的天生桥结构。	喀斯特地貌的形成条件主要包括地质条件和水文条件。地质条件是指地下岩溶岩层丰富、易溶解的岩石地质条件，例如石灰岩、石膏岩等，这些岩石受水的侵蚀容易形成溶洞、地下河流等地貌特征。水文条件是指地下水的丰富程度和活跃性，地下水的运动对岩溶地貌的形成至关重要，它通过溶解、冲蚀、沉积等作用，塑造了喀斯特地貌的独特形态。 举例来说，贵州水城天生桥景区中的天生桥就是由于瀑布冲刷溶洞地形而形成，地下水活跃，加速了岩溶地貌的形成过程，形成了这一独特的景观。
15	主要收入归还村合理分配收益，兼顾公平和效率，利于乡风和谐，减少矛盾；通过智力援助，提升村民的文化水平和技能。			阿者科村实行村集体企业主导的旅游开发模式具有以下优势： 1. 保护传统文化：通过不租不售、不靠外来资本介入的方式，阿者科村成功保护了哈尼传统民居和梯田生态系统，保留了原住民的生活方式，有利于传承独特的地方文化。 2. 提高村民收入：通过组织村民成立旅游发展公司，自我经营和管理，公司收入归全村所有，村集体公司留成30%，村民分红占70%，有效提高了当地村民的收入和生活水平。 3. 增强村民主人翁意识：这种模式使村民更加重视对传统民居、梯田等遗产的保护，因为他们直接从中获得收益，增强了村民对保护文化遗产的自觉性。 4. 促进可持续发展：内源式发展模式减少了对外部资本的依赖，降低了环境破坏的风险，实现了旅游开发与生态保护的平衡，有利于长期的可持续发展。 5. 促进地方经济发展：通过旅游业的发展，阿者科村不仅提升了村民的生活质量，还为地方经济注入了新的活力，促进了当地经济的多元化和稳定增长。	阿者科村实行村集体企业主导的旅游开发模式有以下优势： 1. 保护哈尼传统文化：通过村集体企业主导的开发模式，村民可以更好地保护和传承自己的传统文化，不会被外来资本的影响改变原有的生活方式和文化习俗。 2. 增加村民收入和改善生活水平：通过村集体企业的经营，村民可以获得更多的分红，增加收入，改善生活水平，有利于减少贫困落后状况。 3. 增强村民主人翁意识：村集体企业的经营让村民更加参与和关注村子的发展，增强他们的主人翁意识，更有动力和积极性去保护和发展村子的传统文化和遗产。 4. 提高当地旅游业发展水平：通过村集体企业的经营，可以提高当地旅游业的发展水平，吸引更多的游客前来，促进当地经济的发展。 5. 社会效益和经济效益兼顾：村集体企业经营的模式不仅能带来经济效益，还能带来社会效益，有利于村民和整个村子的长远发展。
18	黑龙江省地广人稀，人均耕地面积大，农业生产规模和机械化水平高，黑土分布广且水热组合条件较好，适宜发展粮食生产，同时国家政策支持巩固提升东北地区商品粮的核心地位，这激发了农民种粮的积极性。			黑龙江省粮食生产近年来在全国比较优势十分突出，主要原因可以从以下几个方面来分析： 1. 气候条件：黑龙江省位于中国东北地区，拥有典型的温带季风气候，四季分明，降水充沛，特别是夏季降水丰富，为农作物的生长提供了良好的条件。这种气候条件有利于大豆、玉米等作物的生长，提高了粮食产量。 2. 土地资源：黑龙江省拥有广阔的土地资源，特别是黑土带的肥沃土地，为粮食生产提供了坚实的物质基础。黑土带的土壤肥力高，水分保留能力强，适合种植各种粮食作物。 3. 政策支持：近年来，中国政府对于粮食安全问题给予了高度重视，实施了一系列支持农业发展的政策，如土地承包制度改革、农业补贴、农机化等。这些政策有助于提高粮食生产效率和产量，增强粮食生产的竞争力。 4. 科技进步：科技进步是提高粮食生产效率和产量的关键因素。黑龙江省在农业科技方面投入较多，推广了高产、高效的作物品种，如高产玉米、优质大豆等，提高了粮食产量。…	黑龙江省粮食生产在全国比较优势突出的主要原因包括以下几点： 1. 地理优势：黑龙江省地处东北地区，气候条件适宜粮食生产，土地资源丰富，拥有大片肥沃的黑土地，适合种植粮食作物，如水稻、玉米等。 2. 技术支持：黑龙江省注重农业科技创新，推广高产高效的农业生产技术，提高粮食产量和质量。例如，引进先进的种植技术、育种技术和农机化设备。 3. 政策支持：政府出台了一系列扶持农业发展的政策措施，包括财政补贴、农业保险、土地流转等，促进了农业生产的发展。 4. 产业集聚效应：黑龙江省农业产业链完整，形成了完善的粮食生产体系，包括种植、加工、物流等环节，形成了产业集聚效应，提高了整体产业竞争力。 5. 人才优势：黑龙江省拥有丰富的农业人才资源，从事农业生产的技术人员和管理人员水平较高，为粮食生产提供了人力保障。 综上所述，黑龙江省粮食生产在全国比较优势突出的原因是综合地理、技术、政策、产业和人才等多方…
27	冰雹降落会砸伤作物和牲畜，造成农业减产，此外冰雹灾害历时短且难以预测。			冰雹灾害对青海省农牧业生产影响较大，主要原因如下： 1. 农作物损害：冰雹的落击可能导致农作物的叶片破裂、果实损伤甚至完全摧毁。例如，玉米、水稻、果树等作物在冰雹袭击后，可能会出现严重的减产甚至全产损失。 2. 牧业生产受阻：冰雹不仅会破坏牧场上的草地，还可能对牧草的生长造成长期影响。同时，冰雹还可能导致牲畜受伤或死亡，影响牧业生产的正常进行。 3. 生态系统破坏：冰雹灾害可能破坏生态系统的平衡，影响野生动植物的生存环境。例如，冰雹可能破坏植被，影响昆虫和小动物的栖息地，从而影响整个生态系统的健康。 4. 人类生活影响：冰雹灾害可能导致房屋和基础设施的损坏，影响居民的生活安全和生产生活秩序。农牧业生产受损后，可能会导致农牧民的收入减少，影响当地经济的稳定。 综上所述，冰雹灾害对青海省的农牧业生产、人类生活和生态系统都有着深远的影响。因此，了解冰雹灾害的形成机制和预测方法，对于减轻其对青海…	冰雹灾害对青海省农牧业影响较大的原因主要包括以下几个方面： 1. 损坏农作物和牲畜：冰雹灾害会直接摧毁农作物和牲畜，导致农田和牧场受损严重，降低了农牧业生产的产量和质量。例如，冰雹可能砸坏庄稼、果树和蔬菜，造成农作物大面积凋零，影响农民的收入来源。同时，冰雹对牲畜的伤害也会给畜牧业带来损失。 2. 破坏农业基础设施：冰雹灾害还可能破坏农业基础设施，如温室大棚、灌溉系统等，影响农业生产的正常进行。修复和重建这些设施需要投入大量资金和人力，给农业生产带来不小的困难。 3. 影响生态环境：冰雹灾害对生态系统造成破坏，破坏植被、土壤，影响水资源等，对生态环境造成一定程度的破坏，导致生态平衡受到破坏，进而影响农牧业生产的可持续发展。 4. 经济损失：冰雹灾害造成的损失不仅包括农业生产和牲畜损失，还包括因为灾害导致的市场价格波动、劳动力成本增加等因素，给农牧业带来经济上的巨大损失。 因此，冰雹灾害对…
30	加拿大的抗寒能力和防滑能力较强；由于纬度较高，冬季漫长，气温极低；同时冬季冰雪天气频发，路面结冰期长。			比亚迪公司为多伦多市设计的电动公交车在性能上有几个重点突出的特点： 1. 环保性：作为新能源汽车的代表，电动公交车不排放尾气，对环境污染有显著减少的作用。特别是在多伦多这样人口密集的城市，减少尾气排放有助于改善空气质量，降低城市的环境压力。 2. 能源效率：电动车的能源转换效率远高于传统燃油车，尤其是当使用可再生能源如水力发电时。这种高效率有助于减少能源消耗，降低运营成本。 3. 安全性：比亚迪的电动公交车采用先进的电池技术和安全设计，确保在紧急情况下不会发生火灾或其他安全事故。这些设计符合或超过了国际安全标准。 4. 可靠性：电动车的机械结构相对简单，维护成本较低。电动公交车的设计旨在确保长时间、频繁运行的可靠性，满足城市公共交通的需求。 5. 适应性：电动公交车可以根据城市的需求进行定制，例如，通过调整电池容量和充电系统，可以适应不同路线的需求，确保车辆能够在有限的充电设施下正常运行…	比亚迪公司为多伦多市设计的电动车需要重点突出的汽车性能是环保和高效。这是因为多伦多作为加拿大最大的城市之一，面临着严重的空气污染和交通拥堵问题。电动车可以减少尾气排放，降低对环境的影响，同时提高能源利用率，减少能源消耗。因此，比亚迪公司设计的电动车在多伦多市需要具有高效的动力系统和优良的续航能力，以满足当地居民对环保和高效出行方式的需求。
32	可能原因是我国经济发展水平提高，导致旅游市场需求量大；现有正规景点总量偏少且收费高；现有各景点同质化严重，游客体验感较差；此外，开设景点的相关手续办理程序繁琐复杂，成本高；这些因素破坏了景区资源，导致景区生态环境恶化；缺少安全设施，游客生命财产安全得不到保障；存在不正当竞争，扰乱了正常旅游市场。			私设“景点”现象泛滥的可能原因主要包括： 1. 经济利益驱动：一些个人或企业为了追求短期经济利益，未经相关部门许可，擅自将自己的房产、土地等作为旅游景点提供游览服务。他们可能认为通过提供旅游服务可以快速获得收益，而忽视了可能面临的法律风险和长远的负面影响。 2. 管理监管缺失：在一些地方，相关部门的监管力度不足，或者监管不严，导致私设“景点”者得以逃避法律的约束。这种情况下，违规经营者可能会认为自己可以在监管不严的环境中行事而不受惩罚。 3. 信息不对称：游客可能对当地的旅游资源缺乏足够的了解，容易被私设“景点”提供的低价优惠吸引，而不了解这些景点未经官方认证，可能无法提供安全和质量保证的旅游服务。 私设“景点”对景区造成的危害主要体现在以下几个方面： 1. 破坏景区的整体形象：私设的景点往往缺乏科学规划和合理管理，可能会破坏原有的自然景观和文化遗产，影响景区的整体美观和旅游体验。 2.…	可能原因包括： 1. 缺乏有效监管：有些地方的管理部门对私设“景点”的监管不到位，导致私设“景点”得以存在和发展。 2. 利益驱动：一些私设“景点”可能是为了牟取暴利而违规开展旅游经营活动，对于一些不法分子来说，这是一个赚钱的机会。 3. 缺乏规范意识：一些私设“景点”的经营者可能缺乏对法律法规的认识，或者对于维护景区环境和游客安全的重要性认识不足，从而私自擅自开展经营活动。 私设“景点”对景区造成的危害包括： 1. 安全隐患：私设“景点”可能没有经过专业机构的安全评估，存在安全隐患，一旦发生事故，可能导致人员伤亡。 2. 环境破坏：私设“景点”可能会破坏景区原有的生态环境，影响景区的生态平衡和景观质量。 3. 影响景区形象：私设“景点”可能经营混乱，服务质量低下，给景区形象带来负面影响，影响游客体验和景区的口碑。
33	积极影响包括有利于提高中国外贸出口，增加外汇收入；促进中国与蒙古、俄罗斯的文化交流；拓宽能源进口渠道，保障中国能源安全；带动西北地区经济发展，有助于国家稳定；合理建议是进一步优化产业结构和发展模式，发展绿色、低碳的循环经济，实现人与自然的持续协调发展；维持社会经济稳定的基础上，避免对生态环境的进一步干扰和破坏；加强生态保育和修复，优先发展对生态干扰或破坏较小的绿色产业和生态产业，在生态保育中适度发展经济。			建设中蒙俄经济走廊对中国发展具有多方面的积极影响： 1. 经济合作加深：中蒙俄经济走廊的建设促进了三国之间的经济合作，加强了区域内的贸易往来和投资流动，提升了区域经济的整体竞争力。 2. 促进区域一体化：走廊的建设有助于推动亚欧大陆东部和西部的经济一体化，增强区域内的互联互通，促进了区域经济的平衡发展。 3. 绿色发展模式：通过将中蒙俄经济走廊划分为优化发展区、重点发展区和保育发展区，并提出相应的绿色可持续发展建议，可以有效地实现经济发展与生态保护的平衡，推动绿色发展模式的形成。 针对不同类型的区域，以下是针对绿色可持续发展的合理建议： 1. 优化发展区（经济发达、生态优良）： - 加强环境监管和保护措施，确保生态环境的持续优良。 - 推广清洁能源技术，鼓励使用可再生能源，减少对化石燃料的依赖。 - 促进绿色产业发展，如环保材料、节能产品等，提升产业结构的绿色水平。 - 实施高质量的城市…	建设中蒙俄经济走廊对中国的积极影响包括：促进区域经济合作与发展、增加贸易往来、提升基础设施建设、推动产业升级与技术创新、拓展市场空间等。在优化发展区方面，可以加强生态环境保护，推动绿色产业发展，鼓励科技创新，提高资源利用效率。在重点发展区方面，可以加强基础设施建设，支持农业现代化，推动教育与培训，促进就业机会。在保育发展区方面，可以加强生态环境保护，推动生态旅游业发展，实施生态补偿机制，促进当地居民可持续发展。综合来看，通过合理规划和管理，中蒙俄经济走廊可以为中国的可持续发展提供更多机遇和动力。 .
35	该地区距离开罗较近，有利于承担人口及产业转移；位于沙漠空地，用地充足；距离苏伊士运河较近，便于物资转运。			埃及新首都选址的优势条件主要体现在以下几个方面： 1. 空间扩展：新首都位于开罗以东45千米的沙漠地区，面积几乎是开罗的两倍，这为城市的发展提供了广阔的空间，能够有效缓解开罗的过度拥挤问题，提供更多的居住和办公空间。 2. 政策支持：埃及政府通过土地销售的方式来抵消新首都的建设成本，这意味着政府在政策上给予了新首都建设充分的支持和资源，确保了项目的顺利进行。 3. 国际合作：中国建筑股份有限公司与埃及住房、公共工程与城市化部签署了埃及新首都商务区项目总承包合同，体现了国际合作的优势。中国在城市规划和建筑领域的经验和技术可以帮助新首都更快地实现发展目标。 4. 试运营阶段：从2021年12月1日起，新首都开始了为期6个月的试运营阶段，这有助于政府和建设方评估城市基础设施的运作情况，及时调整和优化城市规划，以确保城市的长期可持续发展。 5. 地理位置：新首都位于开罗以东，虽然距离开罗有一定距…	埃及新首都选址的优势条件包括以下几点： 1. 地理位置优越：新首都选址于开罗以东 45 千米的沙漠空地，这个位置较开罗更为靠近埃及的主要机场和主要交通枢纽，便于人员和物资的流动，也有利于新首都与其他城市的联系。 2. 空间充裕：新首都的面积几乎是开罗的两倍，有更多的空间来规划和建设城市基础设施，同时也有利于新首都的城市扩张和人口增长。 3. 沙漠空地可开发性强：沙漠空地的开发成本相对较低，而且可以根据规划要求进行灵活的设计和建设，有利于打造一个现代化、宜居的城市。 4. 土地销售弥补建设成本：政府通过土地销售来抵消新首都的建设成本，这样可以减轻财政压力，有助于新首都的可持续发展。 5. 合作项目带来技术和资金支持：与中国建筑股份有限公司合作签署的商务区项目总承包合同，将为新首都带来技术和资金支持，促进项目的顺利实施和发展。 综上所述，埃及新首都选址的优势条件有利于新首都的发展和建设，为其…
38	主要因素包括经济消费水平和与景区的距离；受大天鹅迁徙周期的影响，景区的文化服务供给能力具有季节性周期变化特点；黄河径流量的季节变化大，影响湿地景观的观赏；大天鹅湿地景区为国家级自然保护区，其他人工景点少，游客人数少。			影响平陆三湾大天鹅景区文化服务需求分布的主要因素包括： 1. 季节性迁徙：大天鹅的越冬行为直接影响了景区的游客数量。每年11月底到次年2月，大天鹅从繁殖地迁徙至三门峡越冬，这个时期游客数量会显著增加。摄影爱好者和鸟类观察者也会聚集在此地，进一步推高了游客数量。 2. 生态环境：作为黄河湿地国家级自然保护区的一部分，平陆三湾大天鹅景区提供了一个理想的生态环境，吸引了众多水禽，包括灰鹤和苍鹭等。这种丰富的生物多样性也是景区文化服务需求的重要因素。 3. 促销活动和旅游政策：当地政府和旅游部门可能会开展各种促销活动和旅游政策，以吸引游客，增加景区的文化服务需求。 4. 交通便利性：景区的交通状况也会影响游客数量。交通便利的景区更容易吸引游客，而交通不便的景区则可能会导致游客数量减少。 至于平陆三湾大天鹅景区游客数量季节变化大的原因，可以归结为大天鹅的季节性迁徙行为。这种迁徙行为导致了游客数量的…	影响平陆三湾大天鹅景区文化服务需求分布的主要因素包括大天鹅迁徙季节、气候条件、景区设施和服务水平等。大天鹅迁徙季节是一个重要的因素，因为在11月底到次年2月这段时间，大天鹅聚集在景区越冬，吸引了大量游客和摄影爱好者。气候条件也是影响因素之一，冬季时节黄河湿地的气温适宜，景色宜人，吸引了更多游客前来观赏大天鹅。此外，景区设施和服务水平也会影响文化服务需求分布，如果景区设施完善、服务质量高，游客体验会更好，吸引更多游客。 该景区游客数量季节变化大的原因主要是因为大天鹅迁徙季节的特殊性。在11月底到次年2月这段时间，大天鹅成群结队迁徙到三门峡越冬，这是景区最吸引人的时候，也是游客最多的时候。由于大天鹅是国家1级重点保护动物，其迁徙季节吸引了众多游客和摄影爱好者前来观赏，导致景区在这个季节的游客数量激增。另外，冬季时节黄河湿地的气温适宜，景色优美，也是吸引游客的原因之一。 。
39	随着海拔的升高，云杉林带的生物量呈现先增加后减少的“单峰”变化；最大值出现在海拔 2100～2400 m 处，最小值出现在 1500~1800 m处。			天山云杉林带生物量的垂直变化特征主要体现在随着海拔的升高，生物量逐渐减少。研究表明，天山中山带的雪岭云杉林分布在海拔1600~2800米之间。在这个海拔范围内，云杉林带的生物量随着海拔的上升而呈现出一个逐渐降低的趋势。 具体来说，海拔较低的地区（如1600米左右），云杉林带的生物量较高，因为这里的气候条件更适宜植物生长，光照充足，温度适宜，水分供应充足，这些都有利于植物的生长和生物量的积累。随着海拔的上升，气候条件逐渐恶化，光照减弱，温度降低，水分供应减少，这些都对植物生长产生了负面影响，从而导致生物量的减少。 例如，在海拔2000米左右，云杉林带的生物量可能会比海拔1600米的生物量低约20%；而在海拔2800米的高海拔地区，生物量可能会进一步减少，可能低于海拔2000米的生物量。这种垂直变化的生物量特征反映了植物生态系统对环境因素的响应，以及海拔变化对植物生长的影响。	根据研究结果显示，天山中山带海拔 1600~2800 m之间的雪岭云杉林带生物量呈现出一定的垂直变化特征。通常来说，随着海拔的增加，云杉林带的生物量会逐渐降低，这是由于海拔对气温、降水量、光照等因素的影响导致植被生长条件逐渐变差所致。在天山雪岭云杉林带中，自西南向东北的方向，生物量也呈现逐渐降低的趋势，这可能与气候、土壤条件等因素在不同方向上的差异有关。 在较低海拔处，云杉林带的生物量可能较高，因为气温适宜、降水充足，植被生长条件较好，但随着海拔的增加，气温逐渐降低、降水量减少，植被生长受到限制，导致生物量逐渐减少。因此，天山云杉林带的生物量在垂直方向上呈现出递减的特征。 总的来说，天山雪岭云杉林带的生物量随着海拔的增加呈现出逐渐降低的趋势，同时在不同方向上也存在一定的差异。这些特征反映了气候、土壤、植被等因素在垂直方向上的变化对云杉林带生物量的影响。 。
46	我是赞同的，理由是随着经济发展，工业化、城镇化快速推进，必定会挤占农业用地，导致粮食播种面积减少；工业化发展可能会加剧环境污染，影响粮食质量；经济发展促使农村剩余劳动力向城市转移，农村青壮年劳动力短缺，影响粮食生产。或不赞同，理由是经济发展有利于政府加大对农业的财政扶持力度，加强水利设施建设，提高农民种粮的积极性，改善农业生产条件和经营水平；经济发展有利于农民增加农业技术、生产资料等方面的投入，提高粮食单产和粮食质量；经济发展可以提高粮食加工企业经营水平，进一步带动粮食。			我不完全赞同这个观点。长江经济带经济水平的提高确实带来了许多积极的影响，但同时也存在一些潜在的挑战。以下是我的理由： 首先，经济水平的提高通常意味着技术进步和机械化程度的提高，这些都有利于提高粮食生产效率和产量。例如，通过使用高效的农业机械和先进的灌溉系统，可以大幅度提高作物的产量和质量。 其次，经济发展可以带来更多的资金投入到农业领域，包括购买高品质的种子、化肥和农药，以及改善土壤条件等，这些都有助于提高粮食产量。 然而，经济发展也可能带来一些负面影响。例如，随着农民的收入水平提高，他们可能会转向非农产业工作，减少对农业的投入，这可能导致粮食产量下降。另外，经济发展可能导致土地资源的过度开发和环境污染，这些都可能对粮食安全产生负面影响。 此外，长江经济带作为南方重要的粮食产区，其粮食产量虽然总体呈上升态势，但在全国粮食产量中的份额却呈下降趋势。这可能是由于其他地区的粮食产量增长速度更快…	我不完全赞同长江经济带经济水平提高不利于粮食安全生产的发展这一观点。首先，经济水平的提高可以带动农业现代化和机械化水平的提升，提高农业生产效率，从而增加粮食产量。其次，经济水平的提高可以吸引更多科技和资金投入到农业领域，推动农业科技创新，提高粮食生产的质量和效益。此外，经济水平的提高也有利于改善农民生活水平，减少农民转产转行的情况，保障粮食生产的可持续性。 当然，经济水平提高也可能带来一些负面影响，比如土地资源开发过度、环境污染等问题，这些都需要政府和社会各界共同努力来解决。但总的来说，长江经济带经济水平提高对粮食安全生产的发展是有积极作用的。
52	应大力保护长江生态环境，加快构建综合立体交通走廊，创新驱动产业转型升级，积极推进新型城镇化，努力构建全方位开放新格局，创新区域协调发展体制机制。			为了实现长江经济带发展目标，政府和相关部门采取了一系列措施，旨在解决上述问题并促进区域均衡发展。主要措施包括： 1. **生态环境保护和修复**：加强湿地保护，恢复森林覆盖，保护生物多样性，减少污染，提升生态环境质量。例如，通过实施退耕还林、湿地保护等项目，恢复和保护自然生态系统。 2. **优化管理机制**：建立更加完善的区域管理体系，强化区域协调发展，推动部门间和区域间的合作，形成更加有效的协调机制。例如，建立长江经济带区域协调发展联盟，促进区域内资源共享和协同发展。 3. **基础设施优化**：优化机场、港口、铁路和能源管线等基础设施的规划布局，提高运输效率和服务能力。例如，推动长江流域的高速铁路建设，提升区域内的交通网络连接性。 4. **产业结构调整和升级**：鼓励产业多元化，推动产业转型升级，增强产业链的创新能力和竞争力。例如，发展现代农业、智能制造、绿色能源等新兴产业，提升…	为实现长江经济带发展目标，我们可以采取以下主要措施： 1. 加强生态保护和修复，保障湿地、森林等自然资源的可持续利用，提高生物多样性。 2. 完善区域间的管理机制和协调机制，加强区域内各部门之间的合作与协调，实现资源共享和优势互补。 3. 优化基础设施规划布局，提高交通、能源等基础设施的建设水平和效率，推动区域间的互联互通。 4. 推动产业结构调整和转型升级，加大对中心城市和中小城市产业发展的支持力度，促进产业多元化发展。 5. 加强政策引导和资金支持，鼓励企业加大科技创新投入，提高技术含量和产品质量，推动长江经济带向高质量发展转变。 举例来说，比如可以加大对长江经济带的生态环境保护投入，通过开展湿地保护与恢复工程、推广绿色生产方式等措施，提高生态环境质量；同时，可以加强区域间的合作，推动一体化发展，打破条块分割，形成区域协同发展的局面。 。
57	人口分布不均匀；黑河—腾冲一线东部人口稠密，西部人口相对稀疏。			我国的人口分布主要特点包括： 1. 人口密度差异显著：中国的北方地区人口密度普遍高于南方地区。例如，北京和天津等北方大城市的人口密度远高于西藏、青海等西部边疆地区。 2. 地域差异：人口分布在不同的地理区域有所差异。东部沿海地区的人口密度较高，尤其是大城市如上海、广州等，而西部地区则人口较少，尤其是西藏、宁夏等自治区。 3. 城乡差异：城镇化水平的提高导致城乡人口分布差异加剧。城市人口增长迅速，而农村人口则相对减少。城市人口集中在一小部分大城市，形成了多个世界级的大都市圈。 4. 经济发展水平差异：人口分布也与经济发展水平有关。经济发达地区的人口密度通常较高，如珠三角、长三角等经济发达地区，而经济相对落后的地区人口较少。 5. 政策影响：政府的计划生育政策和人口迁移政策也对人口分布产生了影响。例如，计划生育政策导致人口增长放缓，而人口迁移政策则促进了人口从农村地区向城市地区的流动。	我国人口分布的主要特点包括以下几个方面： 1. 东部沿海地区人口密集：东部沿海地区是我国经济发达的地区，人口相对密集。例如，广东、江苏、浙江、山东等省份人口数量较多。 2. 中西部地区人口稀疏：相比于东部沿海地区，中西部地区地广人稀，人口密度较低。例如，青海、西藏、内蒙古等省份人口相对较少。 3. 城乡差异明显：城市人口密集，农村人口较少。随着城市化进程的加快，越来越多的人口涌入城市，导致城市人口规模不断增加。 4. 人口老龄化趋势明显：随着生育率下降和人口寿命延长，我国人口老龄化问题日益突出，东部地区的老龄人口比例较高。 5. 人口流动性增强：随着经济发展和城市化进程，人口流动性增强，东部地区吸引了大量外来人口，形成了一定规模的外来人口社区。 .
62	沙特阿拉伯降水少，大部分地区为无流区，水资源严重不足；但该国油气资源丰富，能源充足，并大量出口油气创汇，经济实力强；同时该国人口少，人均国民收入高，有雄厚的财力支持海水淡化来缓解生活用水不足的问题。			沙特阿拉伯作为全球海水淡化产量最大的国家，重视海水淡化的原因主要有以下几点： 1. **水资源短缺**：沙特阿拉伯的气候特征是干热，降水量稀少，导致淡水资源非常紧缺。海水淡化技术可以将海水转化为可饮用水，缓解淡水短缺的问题。 2. **经济发展需求**：沙特阿拉伯的经济以石油产业为支柱，石油行业对大量的水资源有很高的需求。海水淡化可以为石油行业提供足够的用水，支持其持续发展。 3. **人口增长压力**：沙特阿拉伯的人口增长迅速，特别是在20世纪70年代之后，随着石油收入的增加，人口数量显著增加，导致对水资源的需求也随之增加。海水淡化技术可以帮助满足人口增长带来的水资源需求。 4. **国际合作与技术进步**：沙特阿拉伯积极参与国际合作，吸收和应用先进的海水淡化技术。随着技术的不断进步，海水淡化的成本和能源消耗正在逐渐降低，这使得沙特阿拉伯更加重视海水淡化技术的发展和应用。 5. **国…	沙特阿拉伯重视海水淡化的原因有以下几个方面： 首先，沙特阿拉伯是一个干旱缺水的国家，大部分地区缺乏淡水资源。海水淡化可以有效地解决这一问题，为居民提供稳定的饮用水和用水。因此，海水淡化在改善人民生活水平和保障国家水资源安全方面具有重要意义。 其次，沙特阿拉伯作为一个以石油为主要经济支柱的国家，石油资源丰富但淡水资源稀缺。海水淡化可以为石油开采和加工提供所需的水资源，保障石油产业的顺利运转，进而促进经济的发展。 此外，沙特阿拉伯拥有丰富的海水资源，海水淡化技术成熟，可以更有效地利用这一资源。通过海水淡化，沙特阿拉伯可以提高海水资源的利用率，减少对地下水和其他淡水资源的依赖，实现水资源的可持续利用。 总的来说，沙特阿拉伯重视海水淡化是为了解决国家的水资源短缺问题，保障经济的可持续发展，以及提高海水资源的利用效率。
63	地势从南向北、自西向东趋缓；地形起伏较大，复杂崎岖；地貌类型多样，多山间河谷发育。			神农架林区的地形地势特征主要表现为以下几点： 1. 地理位置：神农架林区位于中国中部，湖北省西部，是我国地势第二阶梯向第三阶梯的过渡区。这里的地势逐渐从平原向山地过渡，形成了多样的地形地貌。 2. 高程：神农架林区的最高峰是神农顶，其高程为3,105.4米。这表明该地区具有显著的山地特征，地势较高，海拔梯度较大。 3. 面积：神农架林区的总面积约为3,253平方千米，这个面积较大，说明该地区不仅有高山，还有较广阔的山地和丘陵地带。 4. 气候特征：年均气温为11.0~12.2℃，年均降水量约1,219.93毫米。特别是4月至10月的降水量超过全年70%，这说明该地区属于亚热带湿润气候，降水量集中，四季分明。 5. 植被特征：神农架南北坡的植被优势种群分布差异较明显。这可能是由于地形、气候、土壤等因素的影响，导致南坡受阳光照射较多，植物生长较为繁茂，而北坡则较为阴暗，植被较为稀疏。 综上所…	神农架林区的地形地势特征主要包括以下几点：首先，神农架林区位于我国中部，地势为第二阶梯向第三阶梯的过渡区，最高峰为神农顶，海拔高达 3 105.4 米，整体地势较高。其次，该地区面积约 3253 平方千米，地形复杂多变，包括山地、丘陵、高原等地貌类型。再者，神农架林区年均气温较低，为 11.0~12.2℃，年均降水量约 1 219.93 毫米，且4~10月降水量占全年的70%，表明降水季节明显集中。此外，神农架南北坡植被优势种群分布差异明显，反映出地形地势对植被生长的影响。总的来说，神农架林区地形地势特征复杂多样，气候条件独特，是一个典型的山地地区。
64	山中小路尽量沿等高线修建，减小工程量；便于进出人员步行。			神农架林区山间小路蜿蜒曲折的主要理由在于地形复杂和植被覆盖的差异。首先，神农架地处我国中部，湖北省西部，是第二阶梯地势向第三阶梯过渡区，地形起伏较大，山脉和山谷交错，形成了多种多样的地形特征。山间地形的变化导致了路线的自然蜿蜒曲折，以适应地形的变化，确保行走安全。 其次，神农架林区的南北坡植被优势种群分布差异较明显，这也影响了山间小路的走向。南坡的植被可能更加茂密，坡度较为平缓，而北坡则可能有更高的坡度和较少的植被覆盖。为了避免滑坡和保护植被，小路可能会在南坡上蜿蜒，减缓坡度的陡峭程度，同时在北坡上采用更为直线的路线，以适应地形的变化。 此外，为了保护生态环境和野生动植物的栖息地，小路设计者可能会考虑到地形的自然走向，避免破坏植被和生态系统。因此，山间小路的蜿蜒曲折不仅是出于地形适应，也是为了保护和维护神农架林区的自然环境。	神农架林区地势复杂，山高谷深，地形起伏大，因此山间小路蜿蜒曲折。这主要是由于以下几个原因： 1. 地势复杂：神农架林区地处地势第二阶梯向第三阶梯的过渡区，地形复杂多变。山势起伏大，山坡陡峭，沟壑纵横，导致道路需要蜿蜒曲折以适应地形的变化。 2. 植被茂密：神农架林区植被茂密，森林覆盖率高，道路需要顺应自然环境，绕过树木和植被，因此走势曲折。 3. 降水量大：神农架林区年均降水量较大，4~10月降水量超过全年70%，容易形成沟壑和山谷，道路需要绕过这些地形特征，使路线变得蜿蜒曲折。 4. 生态保护：神农架林区是国家级自然保护区，为了保护当地的生态环境，修建道路时需要考虑尽量减少对自然环境的破坏，因此道路设计会更加曲折。 举例来说，如果直线穿过山脉，可能会破坏当地的植被和生态环境，因此设计道路时会选择蜿蜒曲折的方式，绕过重要的生态区域。 总的来说，神农架林区山间小路蜿蜒曲折的主要原因是地形复…
65	神农架山区南坡为阳坡、夏季风的迎风坡，光照强，热量条件好，降水量大，植被生长茂盛，同一自然带分布的海拔高度高于同海拔的北坡。			神农架林区南北坡植被优势种群分布差异较明显的主要原因可以从地理环境、气候条件和生态适应性等方面进行分析。 首先，地理环境因素是影响植被分布的重要因素。神农架林区地处中部山区，南北坡的坡度、坡向和地形特征不同，导致了土壤类型、土壤肥力和水分供应等方面的差异。例如，南坡通常比北坡更为湿润，土壤更为肥沃，这为南坡上的某些优势种群提供了更好的生长条件。 其次，气候条件也是影响植被分布的关键因素。神农架林区的年均气温和降水量有所差异，南北坡的日照时间、温度和降水量也存在差异。南坡由于地势较低，日照时间较长，温度较高，而北坡则较为寒冷，日照时间较短。这些气候差异使得不同种群对环境的适应性有所不同。 再者，生态适应性也是影响植被分布的重要因素。不同种群在生长过程中对环境的适应性不同，某些种群可能更适应南坡的湿润环境，而某些种群则更适应北坡的干旱环境。例如，南坡的湿润环境可能更适合一些喜湿的树木和灌木，…	神农架南北坡植被优势种群分布差异较明显的主要原因可能包括以下几点： 1. 高程差异：神农架地区最高峰神农顶的高程为 3 105.4 m，南北坡的高程差异较大，这会导致气候、土壤等环境因素的差异，从而影响植被的生长分布。 2. 降水分布：根据数据显示，4~10月降水量超过全年70%，南北坡在降水量分布上也可能存在差异，这会直接影响植被的分布情况。 3. 阳光照射：南坡和北坡在阳光照射时间和强度上也有所不同，这会导致植被在南北坡生长的适应性有所差异。 4. 土壤条件：南北坡的土壤类型和质地可能存在差异，这也会对植被的生长分布产生影响。 综上所述，神农架南北坡植被优势种群分布差异较明显的原因主要包括高程差异、降水分布、阳光照射和土壤条件等因素。这些因素使得南北坡环境条件有所不同，从而导致植被分布的差异性。。
66	对新疆的影响包括获得资金、技术和管理经验，有利于产业升级；促进资源优势转化为经济优势。对江苏的影响包括缓解资源紧张局面，扩大市场。			江苏省和新疆维吾尔族自治区之间的相互协作关系，通过企业的转移和合作，带来了双方经济发展的积极影响。 首先，江苏省的企业转移至新疆，促进了新疆的工业化和城市化进程。例如，江苏的电子信息、纺织服装等行业企业在新疆的投资和运营，为当地提供了就业机会，提升了当地居民的收入水平。此外，这些企业的引入也为新疆的基础设施建设提供了资金支持，改善了交通、能源供应等条件，有助于新疆的经济结构优化和产业升级。 其次，新疆的资源优势与江苏的产业优势相结合，促进了资源的有效利用和产业的多元化发展。新疆丰富的矿产资源和江苏的先进制造技术的结合，促进了新能源、绿色建筑材料等新兴产业的发展，为江苏企业提供了新的市场和增长点。 再者，这种协作关系还促进了两地之间的贸易和投资，增强了区域经济的互联互通。江苏企业在新疆的投资和生产，增加了两地之间的物流往来，促进了商品和服务的流通，提升了区域内的经济活力。 最后，这种合作还…	江苏和新疆相互协作对两省经济发展带来了积极影响。首先，江苏省的企业转移至新疆可以促进新疆的产业发展，提升当地就业水平，增加税收收入。其次，江苏省的先进技术和管理经验可以带动新疆的技术水平和产业升级，提高新疆的产业竞争力。此外，两地在经济合作中可以互通有无，资源共享，形成互利共赢的局面，推动两地经济的稳步增长。最终，江苏和新疆相互协作会加强两地的经济联系和合作意识，促进区域经济一体化发展。
67	陕南地形以山地、汉江谷地为主，植被以亚热带常绿阔叶林为主；关中渭河平原为主，植被以温带落叶阔叶林为主。			陕南地区的地形主要由山地和丘陵构成，植被以亚热带和热带常绿阔叶林为主。由于地形的起伏变化，陕南地区的自然景观特征呈现出多样性和丰富性。例如，秦岭山脉是陕南地区的主要山脉之一，拥有丰富的生物多样性和独特的地质景观，如丹阁奇峰、五丈原等自然风光名胜。 相比之下，关中地区的地形主要是平原和低洼地带，植被以温带草原和农田为主。由于历史上农业发达，关中平原的自然景观特征更多地体现在其农业景观上，如金色的麦浪、绿色的油菜花海等。同时，由于关中平原是中国历史文化的发源地，自然景观与人文景观相结合，形成了独特的历史文化景观，如华山、华清池等。 然而，随着水资源紧缺的问题日益严重，两地区的自然景观特征也面临着挑战。例如，水资源的短缺可能导致植被退化，农业景观的变化，进而影响当地的生态平衡和生物多样性。	从地形上来看，陕南地区以秦岭山脉为界，地势多为山地和丘陵地形，山峦起伏，沟壑纵横，地势较为险峻。而关中地区则是一个平原地带，地势平坦，土地肥沃，适合农业生产。植被方面，陕南地区的植被类型主要是针叶林和阔叶林，植被丰富，生态环境良好。而关中地区由于地势平坦，植被类型以草原和耕地为主，植被相对较少。因此，陕南地区在自然景观上以山水风光为主，而关中地区则以平原农田为主。 。
69	植树造林，大力发展林果业；兴修蓄水池，改善农业生产用水；兴修机耕道、作业使道等基础设施，改善农业生产条件；大力发展旅游观光产业，带动水果销售。			朗溪镇治理石漠化的主要措施包括： 1. 结合当地地形，实施“长藤结瓜”工程：通过将道路作为“藤”，引导降水流向蓄水池，改善地表的集水功能，提高生产生活的储水量。同时，沿道路修建蓄水池，以此来保障经果林的正常有效补灌。 2. 实施“经果林”工程：通过种植各种果树，如桃树、李子树、橘子树等，形成多层次的林地结构，实现一年四季的果实生产。这种方式不仅有助于改善生态环境，还能提供经济效益。 3. 配套建设基础设施：包括修建机耕道和作业便道等，确保农业生产的便利性和效率。 通过这些措施，朗溪镇不仅有效地治理了石漠化问题，还创造了一个充满生机和经济价值的生态环境。特别是在春、秋两季，镇上的果树盛花盛果，吸引了大量游客，促进了当地的旅游业和绿色水果的销售。	朗溪镇治理石漠化的主要措施包括“长藤结瓜”与“经果林”工程。具体来说，他们以路为“藤”，将降水引入蓄水池，以池为“瓜”，沿途修建蓄水池，改善地表集水功能，提高生产生活储水量，保障经果林的正常有效补灌。同时，他们还配套建设了机耕道、作业便道等基础设施，为土地的治理提供了便利条件。这些措施的实施，使原本的石山荒山变成了绿色新景观，形成了“一年四季春常在、春夏秋冬果飘香”的美丽景象。在春、秋两季，各种水果树的开花、结果更是吸引了大量游人前来观赏、游玩、购买绿色水果，为朗溪镇的生态环境和经济发展带来了积极的影响。
71	多海湾，风浪小；浅海大陆架，水域浅；入海河流带来大量泥沙。			荷兰围海造陆的优势自然条件主要体现在以下几个方面： 1. 海岸线资源：荷兰位于西欧的北海沿岸，拥有长而连续的海岸线，这为围海造陆提供了丰富的自然资源。长的海岸线意味着更多的海域可以被利用来进行造田和建设。 2. 地形特征：荷兰的国土大部分是低洼的平原，这使得水利工程的建设相对容易。低洼的地形也意味着水可以被有效地控制和管理，这对于围海造陆和防洪堤的建设至关重要。 3. 气候条件：荷兰的气候属于温带海洋性气候，降水量相对丰富，年雨量大约在800毫米左右，这为农业生产提供了充足的水分。同时，海洋性气候的特点是降水量相对均匀分配，减少了旱涝灾害的风险。 4. 水利工程成果：荷兰在历史上投入巨大的人力和物力修建了众多的水利工程，如须德海拦海大坝等。这些工程不仅能够有效地控制水流，防止洪水泛滥，还能够通过围海造田开辟出新的土地资源。 5. 地理位置：荷兰位于欧洲的西北部，地理位置便利，连接着大西洋…	荷兰围海造陆的优势自然条件主要体现在以下几个方面： 1. 地势低洼：荷兰地势低洼，有大量的海域可以利用进行围海造田，这为荷兰创造了围海造陆的天然条件。 2. 海拦海大坝：荷兰修建了长达30千米的须德海拦海大坝，这种工程设施在其他国家可能不容易实现，而荷兰正是利用这种大坝来开垦新土地。 3. 投入大量风车进行围海造田：荷兰投入了大量的风车进行围海造田，这种独特的方式也是荷兰围海造陆的一个优势条件。 4. 地势适宜：荷兰近四分之一的土地低于海平面，仅三分之一的地面高出海平面一米，其余地区海拔多在10-30米之间，这种地势适宜也为围海造陆提供了条件。 总的来说，荷兰围海造陆的优势自然条件主要在于地势低洼、海拦海大坝、投入大量风车进行围海造田以及地势适宜等方面。这些条件使得荷兰能够利用自然资源进行围海造陆，从而创造出大量的新土地来支持国家的发展。
72	拦海大坝阻挡了海潮；通过拦海大坝的闸门调控水流，将成水排出；雨水补给和河流不断汇入，持续降低盐度，使该海域最终成为淡水湖。			须德海拦海大坝的建设是一个复杂的工程，它涉及到水力学、地质学和环境工程等多个领域。以下是该工程变更须德海为淡水湖的过程简述： 1. **规划与设计**：在1920年左右，荷兰政府和工程师们开始规划和设计须德海拦海大坝。他们的目标是通过建造大坝来阻止海水进入低洼的土地，并利用风力发电机来提供必要的能量来维持水位。 2. **建设阶段**：工程开始后，工程师们首先需要在须德海的两岸挖掘并建造大坝。这个过程需要大量的劳动力和现代的机械设备。随着大坝的建成，海水被阻隔在大坝的另一侧，而大坝的另一侧则逐渐形成了一个封闭的水域。 3. **排水与填海**：在大坝建成后，荷兰人通过开挖排水渠道，将海水排出水域，同时利用风力发电机来维持水位。随着水位的下降，海底的土地逐渐暴露出来，成为可以用于农业和其他用途的新土地。 4. **新土地的开垦**：随着水域内的水量减少，海底的土地逐渐变成可以耕种的土地。荷…	须德海拦海大坝的建设是为了防止海水侵袭并开垦新土地，其中一个重要的结果就是原本的须德海水域变成了淡水湖。这个过程主要是通过大坝的阻挡作用，阻止了海水的进入，同时通过排水系统将海水排出，使原本的海水逐渐被淡水替代。随着时间的推移，原本的咸水环境逐渐被淡水环境所取代，形成了今天的须德湖。 举例来说，类似的过程也发生在美国的三峡大坝建设后，原来的长江水域也变成了淡水湖。这种过程是通过人工干预和控制水流的方式实现的，最终形成了新的淡水生态系统。 。
73	提供水源；创造了大量的土地资源或扩大了陆地（国土）面积；提升了艾瑟尔湖两岸的交通通达度。			须德海拦海大坝建成后，对荷兰填海造陆区域经济发展产生了积极的影响。首先，大坝的修建和随之而来的土地开垦，为荷兰提供了大量的新土地资源，特别是弗莱福兰省的成立和发展，极大地扩大了该国的农业生产能力和土地利用范围。这些新开垦的土地不仅增加了粮食和作物的生产量，还为荷兰的畜牧业、林业等提供了更多的空间，从而促进了农业产业的整体发展。 其次，须德海拦海大坝的修建和运营还促进了荷兰的物流业发展。由于荷兰的地理位置和低洼的地形，使得该国成为一个自然的物流枢纽。须德海拦海大坝上修建的双向4车道高速公路不仅是世界上最长的防洪堤坝，也为荷兰的物流运输提供了便利的通道。荷兰政府通过实施转口贸易发展战略，成功地将荷兰打造成为欧洲的物流中心，吸引了大量的物流分拨中心，包括欧洲70%的物流分拨中心。荷兰在欧洲企业的一半以上的物流业务中占据主导地位，物流产值超过国内生产总值的30%，成为荷兰国民经济的重要支柱产业。…	须德海拦海大坝的建成对荷兰填海造陆区域经济发展起到了积极作用。首先，大坝建成后开垦出的新土地为荷兰创造了更多的发展空间，超过1700平方千米的新土地可以用于农业、工业、物流等领域的发展，促进了当地经济的增长。其次，大坝上修建的双向4车道高速公路为当地的交通运输提供了便利，加快了货物流通速度，促进了当地物流业的发展。最后，填海造陆区域的发展也吸引了大量的投资和企业进驻，带动了当地就业机会的增加，提高了居民的生活水平。 举例来说，弗莱福兰省作为荷兰最年轻的省份，正是由于填海造陆而发展起来的。这个省份拥有现代化的物流设施和便捷的交通网络，吸引了大量的跨国物流企业在此设立分支机构，促进了当地经济的蓬勃发展。 总的来说，须德海拦海大坝的建成为荷兰填海造陆区域经济的发展带来了积极的影响，推动了当地经济的多元化发展和国民经济的持续增长。 .
78	自然原因方面该地区黄土质地疏松，易受雨水冲刷；地形起伏大，坡度陡峭加剧了水土流失；降水集中且多，暴雨侵蚀作用强烈；人为原因方面，过度开垦和过度放牧等不合理的土地利用破坏了地表植被，加剧了水土流失。			黄土高原地区水土流失严重的主要原因包括： 1. 地理地形因素：黄土高原地形多为山地丘陵，坡度较大，土壤易脱水，流失速率高。长期的水力侵蚀和风力侵蚀加剧了水土流失。 2. 土壤类型：黄土高原的土壤主要是黄土壤，土壤结构疏松，含水量低，水分容易蒸发，土壤易被风和水侵蚀。 3. 气候条件：黄土高原位于半干旱气候区，降水量较少，雨季集中，雨量多而短，导致土壤水分迅速蒸发和渗透，增加了水土流失。 4. 人类活动：历史上，黄土高原地区的农业开发和人口增长导致土地开垦增加，耕地面积扩大，进一步加剧了水土流失。 5. 生态系统破坏：长期的过度放牧和不合理的林木采伐破坏了原有生态系统，减少了植被覆盖，降低了土壤的稳定性，增加了水土流失。 这些因素相互作用，共同导致了黄土高原地区水土流失的严重问题。	黄土高原地区水土流失严重的主要原因包括以下几点：首先，该地区地形起伏大，土壤贫瘠，降水不足，植被覆盖度低，易发生水土流失。其次，长期以来的过度人为开发，如过度砍伐植被、过度耕种等，破坏了土壤结构，加速了水土流失的发生。再者，陡坡耕地面积较大，耕种方式传统，缺乏科学的水土保持措施，也导致了水土流失的加剧。最后，气候变化等自然因素的影响也使得该地区水土流失问题更加严重。
84	为玉米主产区，原料丰富；皆为欠发达中小城市，地价便宜，劳动力丰富且价格低。			该公司在惠民、铁岭、通辽、鄂尔多斯等地建设毛油压榨工厂的优势条件主要包括以下几点： 1. 地理位置：这些地区都位于中国东北和华北地区，这些地区是中国主要的玉米产区，拥有丰富的玉米资源，确保了玉米油生产的原料供应稳定。 2. 政策支持：中国政府鼓励发展农业产业化和农产品深加工，特别是在东北地区，政府出台了一系列政策支持农业转型升级，包括税收优惠、资金支持等，这些政策为公司的投资提供了有利的环境。 3. 交通便利：这些地区的交通网络发达，拥有铁路、公路等多种运输方式，能够便捷地将玉米运输到工厂，并将生产的毛油运输到精炼油生产基地，这有助于降低运输成本和提高物流效率。 4. 人才资源：这些地区拥有丰富的农业技术人才和工人资源，能够满足公司的生产需求，同时也能够支持公司的技术创新和产品研发。 5. 经济发展潜力：这些地区的经济发展潜力较大，公司在这些地区的投资不仅能够获得较高的回报，还能够促进当…	在惠民、铁岭、通辽、鄂尔多斯等地吸引该公司建设毛油压榨工厂的优势条件包括： 1. 地理位置优势：这些地区靠近玉米生产基地，便于获取原料并降低运输成本。 2. 政策支持：当地政府可能提供税收优惠、土地优惠等政策支持，吸引企业投资建厂。 3. 人力资源：这些地区可能有丰富的劳动力资源，便于企业招聘和管理员工。 4. 基础设施完善：这些地区可能有良好的交通、通讯等基础设施，有利于企业生产和运营。 5. 市场需求：这些地区可能有较大的市场需求，有利于企业销售产品并扩大市场份额。 举例来说，鄂尔多斯是内蒙古自治区的重要产粮区，玉米种植面积大，为该公司提供了丰富的原料资源；通辽是东北地区的经济中心，地理位置优越，交通便利，有利于企业的物流运输。这些优势条件使得这些地区成为该公司建设毛油压榨工厂的理想选择。 .
85	合理交通方式为陆海联运；因为长距离海运费用较低，节约运输成本。相比铁桶运输，使用集装箱液袋运输转运方便，只需单程运输，节约运输费用；液袋可充分利用集装箱的空间，装载量大（具有规模运输优势）。			将毛油由铁岭运输到广州精炼油生产基地的合理交通方式主要有以下几种： 1. 铁路运输：由于毛油的体积较大，重量相对较重，铁路运输可以节省燃油成本，并且运输速度较快，适合长距离运输。 2. 海上运输：如果从铁岭到广州的距离较远，海上运输可能是更经济的选择。可以通过集装箱货轮将毛油运输到沿海的港口，然后再转运至广州。 3. 道路运输：如果距离较近，或者需要快速响应市场需求，可以选择公路运输。现代公路运输设施较为完善，尤其是使用集装箱液袋的方式，可以方便快捷地完成运输任务。 使用集装箱液袋运输相对于使用铁桶运输的优势主要体现在以下几个方面： - 危险性降低：集装箱液袋是一种一次性使用的容器，避免了铁桶可能存在的泄漏和腐蚀问题，提高了运输的安全性。 - 易于处理：集装箱液袋在运输完成后可以直接丢弃，不需要像铁桶那样进行清洗和回收处理，节省了后期的处理成本和时间。 - 易于堆叠：集装箱液袋可以方便地…	推测将毛油由铁岭运输到广州精炼油生产基地的合理交通方式可能是通过铁路运输。铁路运输相对于公路运输更为经济、环保且效率更高，因为铁路运输可以一次性运输大量的货物，减少了运输成本和时间。同时，铁路运输也更为稳定和安全，能够保证毛油的质量不受损失。 使用集装箱液袋运输相对于使用铁桶运输的优势在于： 1. 成本更低：集装箱液袋是一次性使用的软体包装容器，相比起铁桶，集装箱液袋的成本更低，可以降低包装费用。 2. 环保更好：集装箱液袋可以重复利用，减少了废弃物的产生，符合现代环保理念。 3. 运输效率更高：集装箱液袋可以一次性装载更多的货物，减少了装卸货物的次数，提高了运输效率。
88	冬夏季节风力大，风力搬运作用强；夏季盛行偏东风，冬季盛行偏北风，风向常年稳定少变；海滩面积广，为沙堆发育提供沙源；海岸生长着草丛沙生植物，起到减风、固沙作用，有利于沙堆的形成等。			东海岛草丛沙堆的形成受到了该地区的气候、地理和风力条件的共同影响。首先，夏季盛行偏东风为草丛沙堆的形成提供了有利的风力条件。这种风向能够将海风带来的沙粒吹向海岸线，特别是在海滩后缘的高大的海岸沙堤处，沙粒的堆积更加集中。 其次，冬季盛行偏北风也对草丛沙堆的形成起到了推动作用。冬季的北风能够进一步加强沙粒的堆积，尤其是在老鼠书和老鼠节草丛的阻挡下，沙粒在这些植物的保护下形成了稳定的沙堆。 此外，降水集中在5~10月的季节性特征也对草丛沙堆的形成有积极影响。夏季和秋季的降水能够保持沙堆的湿润状态，增强其稳定性，同时也为植物的生长提供了足够的水分，促进了固沙植物的生长和沙堆的形成。 综上所述，东海岛草丛沙堆的形成得益于该地区的气候条件、风力条件以及地理特征。这些条件共同作用，促进了沙粒的堆积和固沙植物的生长，形成了独特的蝌蚪形和锥形的草丛沙堆地貌。	草丛沙堆的形成受到多个有利条件的影响。首先，海滩后缘的高大海岸沙堤为草丛提供了一个相对稳定的生长环境，阻挡了海风的侵蚀，使得草丛得以长时间生长并固定沙丘。其次，东海岛夏季盛行偏东风，这种风向有利于将沙粒吹向沙堤，进一步增加沙堆的高度和规模。此外，老鼠书和老鼠节草是优良的海边固沙植物，它们的根系能够有效地固定沙土，防止沙丘被风吹散。因此，东海岛的地理位置、气候条件以及植被种类都为草丛沙堆的形成提供了有利条件。 举例来说，类似于东海岛地理位置的其他海岛或沿海地区，如果具有相似的高大海岸沙堤、适宜的气候风向和固沙植被，也有可能形成类似的草丛沙堆。这些有利条件共同作用，促使了草丛沙堆在东海岛这一地区的形成和发展。 。
89	先形成蝌蚪形老鼠艻沙堆，后形成锥形老鼠苏沙堆。理由：发育初期的老鼠艻以匍匐生长为主，风沙沿下风向在植被后方拖出细长的尾巴，形成蝌蚪形老鼠芳沙堆；老鼠芳继续生长，形成草丛，拦截沙物质使沙堆不断增高，形成锥形老鼠艻沙堆。			蝌蚪形老鼠节沙堆通常在锥形老鼠节沙堆形成之前。这种顺序的形成可以从风力作用的角度来解释。风力在海滩上移动沙粒，形成沙堆。锥形沙堆是最稳定的形态，因为它的底部较大，能够更好地抵御风力侵蚀。因此，锥形沙堆往往是第一个形成的，因为它们能够更快地达到稳定状态。 蝌蚪形沙堆则是随后形成的，它们通常在锥形沙堆周围形成。蝌蚪形沙堆的形成可能是因为风力在锥形沙堆的保护下，继续在周围的草丛和沙地上堆积沙粒。由于蝌蚪形沙堆的形态较为不稳定，它们更容易受到风力侵蚀和重塑，形成类似蝌蚪的形状。 总的来说，锥形老鼠节沙堆在风力作用下先形成，因为它们是最稳定的形态，而蝌蚪形老鼠节沙堆则是在锥形沙堆的保护下，随后在风力作用下形成的不稳定形态。	蝌蚪形老鼠节沙堆是在锥形老鼠节沙堆之后形成的。这是因为在海滩上，风力作用下的沙粒会被海边固沙植物-老鼠书阻拦，形成老鼠节草丛沙堆。由于风的方向是夏季盛行偏东风，老鼠书生长在沙堤东部，所以在风力作用下，沙粒会首先被阻拦在老鼠书的位置，形成蝌蚪形老鼠节沙堆。而在蝌蚪形老鼠节沙堆的后方，沙粒继续受到风力作用，堆积在老鼠书的后方形成锥形老鼠节沙堆。
90	太行山对黄土高原形成的影响：黄土高原的黄土主要受强盛西北风的搬运作用，从西北内陆吹向东部，由于高大的太行山呈东北一西南走向，对西北风有明显的阻挡作用，大量黄土因风力减弱便堆积在太行山西侧构成黄土高原。太行山对黄土高原分布的影响：由于太行山的阻挡使得黄土不能越过高山，黄土高原仅分布在太行山西侧。			太行山东侧山前形成的典型洪积扇和冲洪积平原是由于山体的侵蚀作用和河流的沉积作用共同作用的结果。洪积扇是由河流在山前平缓的地区沉积大量的泥沙和岩石碎屑形成的扇形地形。这些沉积物主要来自于太行山脉的侵蚀，包括山体的风化、滑坡和径流侵蚀等。 洪积扇的形成过程可以分为以下几个阶段： 1. 太行山脉的侵蚀：山体的风化和径流侵蚀不断地将岩石和土壤侵蚀下来，形成大量的泥沙和碎屑物。 2. 河流的运输：这些泥沙和碎屑物被河流运输到山前平缓的地区。 3. 河流的沉积：当河流到达山前平缓的地区时，由于水流速度减慢，泥沙和碎屑物开始沉积。 4. 形成洪积扇：随着时间的推移，河流的沉积物逐渐积累，形成了一个扇形的地形，这就是洪积扇。 冲洪积平原是洪积扇的进一步发展和演变，它是由河流冲刷和洪水冲积形成的平坦地带。冲洪积平原的形成过程通常包括以下几个阶段： 1. 洪水的冲刷：频繁的洪水会对洪积扇进行冲刷，清除部分沉…	洪积扇是指由河流在山脚下堆积而成的三角形扇形地带，是由于河流在山脚下流速减慢而携带的泥沙沉积在此处形成的。在太行山东侧，由于山脉相对高差大，河流在山脚下受到阻碍流速减慢，沉积物沉积在此处形成了典型的洪积扇。而洪积平原是指在洪水时期河流冲刷出来的平坦河床，由于太行山地形复杂，洪水在山脚下冲刷出来的河床形成了冲洪积平原。这些洪积扇和冲洪积平原的形成过程都是由于太行山地形对河流流速和沉积物携带的影响而形成的。。
94	以地下淡水为主要补给水源；天池海拔高于其下游湿地，气温较低，蒸发较弱；堰塞体由黄沙组成，渗水性强，利于湖水向下游湿地渗漏，排出盐分。			"大漠天池"能够成为淡水湖泊的原因主要有以下几点： 1. 地质屏障：黄沙的阻断作用形成了一个天然的屏障，阻止了外部的盐分和沙土进入潭内。这种屏障类似于人工建造的堤坝，有效地隔离了潭内的水体，使其不受外界盐分污染。 2. 花岗岩崖壁的保护作用：大漠天池两侧的异常陡峻的花岗岩崖壁不仅提供了天池的自然边界，还起到了保护潭水不受外界影响的作用。花岗岩是一种硬质岩石，能够有效地阻止水分渗透和盐分渗入。 3. 水位变化小：问题中提到，水位季节变化小，这意味着潭水的补给和排水相对稳定，减少了外部盐分和其他物质进入潭内的机会。 4. 高海拔位置：大漠天池的湖面海拔高约1365米，与周围地势形成了明显的高差。这种高海拔位置使得潭水的水源主要来自于地表径流和地下水，减少了与盐湖等盐分高的水体的直接接触。 5. 湿地的补水作用：大漠天池与湿地之间有15米的高差，湿地可能是潭水的补水来源。湿地能够通过蒸发和渗透…	"大漠天池"能够成为淡水湖泊的原因主要有以下几点：首先，该地区的地质构造特殊，夹在巴丹吉林沙漠和花岗岩岩体之间，形成了一个狭长幽深的潭水，阻隔了沙漠的黄沙，使得湖水不受沙漠的侵蚀。其次，周围的岩石崖壁发育有大量裂隙，这些裂隙可以为地下水提供补给，维持湖水的水量和水质。另外，该地区的地形高低差异较大，与附近的湿地和盐湖之间有高差，这也有利于形成淡水湖泊。总体来说，大漠天池处于特殊的地质环境中，得到了地形、地质和水文条件的综合作用，才能成为一个淡水湖泊。 "
97	黄土高原地区的能源开发对经济发展起到了积极作用，因为能源开发提供了丰富的资源为当地经济的发展奠定了牢固的物质基础。此外，能源产业的发展不仅促进了相关产业的繁荣，如交通运输、机械制造等，还为当地创造了更多的就业机会。同时，能源开发还带动了周边地区的基础设施建设和社会事业发展，推动了区域经济的整体进步。			黄土高原地区的能源开发对经济发展产生了积极的影响，主要体现在以下几个方面： 1. 提高能源供应保障：黄土高原地区蕴藏有丰富的煤炭、石油、天然气等能源资源。能源开发和利用不仅满足了当地的能源需求，还通过输送至其他地区，增强了国家能源供应的稳定性和可靠性。 2. 推动工业发展：能源开发为当地的工业发展提供了强有力的物质基础。煤炭作为主要的能源，支持了煤炭开采、化工、钢铁、建材等行业的发展，促进了工业规模的扩大和产值的增加。 3. 促进就业和收入增长：能源开发项目的建设和运营为当地提供了大量的就业机会，提高了居民的收入水平。同时，能源行业的发展还为政府提供了税收和其他经济收益，增强了地方财政的收入。 4. 推动基础设施建设：为了保障能源的开采、运输和使用，黄土高原地区的基础设施建设得到了加强，包括铁路、公路、电网等。这些基础设施的建设不仅服务于能源行业，还促进了区域内其他行业的发展。 5. 增…	黄土高原地区作为我国重要的能源基地，能源开发对经济发展的积极作用主要体现在以下几个方面： 首先，能源开发带动了当地的产业发展。通过开发煤矿、石油和天然气资源，促进了相关产业的发展，如煤炭加工、石油化工等，进而带动了区域经济的增长。 其次，能源开发为当地提供了大量就业岗位。能源产业的发展需要大量的人力资源，因此能够吸纳大量的就业人口，有助于解决当地的就业问题，提高居民的收入水平。 再次，能源开发增加了地方政府的财政收入。通过资源开发所得的税收和利润可以用于地方基础设施建设、教育医疗等公共事业，促进了当地经济的发展。 总的来说，黄土高原地区能源开发对经济发展起到了积极作用，促进了当地经济的增长和就业机会的增加。 。
98	黄土高原地区实施生态环境治理措施取得了积极的效果。这些措施有效地改善了当地的生态环境，减轻了水土流失的程度，提高了土地的质量，从而有利于农业生产和生态恢复。生态移民等措施可以减轻当地的人口压力，有助于缓解人地矛盾，促进可持续发展。然而，这些措施也带来了一些社会经济问题，如移民安置、就业转型等等。这些问题需要政府和社会各界的共同努力解决。			黄土高原地区实施生态环境治理措施的影响可以从多个方面进行评价。首先，从生态环境改善的角度来看，退耕还林、水土保持和生态移民等措施有效地减缓了水土流失，恢复了植被覆盖，提高了土壤保水能力，减少了洪水和泥沙淤积，改善了当地的生态环境。例如，通过退耕还林，黄土高原地区的植被覆盖率显著提高，减缓了土壤侵蚀，降低了洪水风险。 其次，从社会经济角度来看，这些治理措施虽然带来了生态环境的改善，但也引发了一些社会经济问题。例如，生态移民可能导致当地居民的生活和经济活动受到影响，需要通过政府补贴和其他支持措施来缓解。同时，生态环境治理可能会限制某些能源开发活动，影响当地的经济发展。 最后，从长远来看，黄土高原地区的生态环境治理措施对于维护生态平衡和可持续发展具有重要意义。通过综合考虑生态环境保护和社会经济发展的平衡，黄土高原地区可以实现可持续发展，促进区域经济的健康增长，同时保护和改善生态环境。	黄土高原地区实施生态环境治理措施的影响是双重的。一方面，这些措施有效地改善了当地的生态环境，减少了水土流失、提升了植被覆盖率，提高了生态系统的稳定性。这对于保护当地的生态环境、维护水资源的可持续利用具有积极的作用。另一方面，生态环境治理措施也带来了一些社会经济问题，比如实施退耕还林政策可能导致农民收入减少，生态移民可能面临就业问题等。因此，在实施生态环境治理措施时，需要综合考虑生态环境和社会经济的平衡，采取更加科学、可持续的发展方式。 举例来说，退耕还林政策虽然能够减少水土流失，但也会影响当地农民的种植收入。为了解决这个问题，可以引入新的农业种植方式或者发展生态旅游等产业，为当地农民提供新的经济来源。这样既能保护生态环境，又能解决农民的经济问题。 。
