# Supplementary material
Source: ML conference proceedings conference paper supplement (https://openreview.net/forum?id=R7pR4dzgAV)
Supplement: supplementary_material [file hisen.xlsx]

## Sheet: Sheet1
context	Question	Concise_Reference	student_answer_a	student_answer_b	student_answer_a vs student_answer_b	student_answer_a vs student_answer_b_new	model_answer_a	model_answer_b	model_answer_a vs model_answer_b	stud_answer_a vs model_answer_a	stud_answer_a vs model_answer_b	model_answer_a vs model_answer_b_new	stud_answer_a vs model_answer_a_new	stud_answer_a vs model_answer_b_new
材料一先秦儒学是在特定的时代气候之下，植根于前代文化的丰厚土壤而成长起来的。它既承担着前代文化传统传承接续的历史使命,也必须回答当时社会所面临的实际问题。春秋时代剧烈变化着的中国社会,在政治、经济、军事、伦理、文化等方面都向当时的思想家们提出了许多迫切需要解决的现实问题。这些问题大多是由于生产力发展到一定水平之上以后，人群之间的社会关系、社会交往、社会组织日趋复杂化而引发出来的，而其核心问题是社会政治与伦理道德问题。这也是先秦儒学所要着重解决的问题。摘编自徐克谦《先秦儒学及其现代阐释》材料二韩非子曾说：“世之显学，儒、墨也。”然而，实际情况却复杂得很。孔子为了宣传自己的学术理想,寄希望于周游列国,却以失败告终;孟子时代,则是“杨朱、墨翟之言盈天下”;秦始皇更是实行了“焚书坑儒”的决策。虽然，汉初儒学偶有机会露面，但很快就被道、法强势逼退，至汉武帝时，这一局面才逐渐被打破。公元前 134 …	根据材料二并结合所学知识，简述先秦至汉代儒学地位的变化，并分析这一变化产生的原因。	变化从位居显学但不受统治者重视到成为官方正统学说。不受重视的原因是法家思想迎合了春秋战国时期社会变革的需要。汉朝成为正统学说的原因包括汉武帝对儒学的重视和支持、汉武帝时期国家强盛治国理念需要革新、先秦以来儒士的不懈坚持以及董仲舒积极吸收诸家思想使儒学适应了封建专制统治的需要。	先秦时期，儒学受到了抵制，其地位并不显著。然而到了汉代，儒学却得到了广泛推行和发展。这种变化的原因主要有三点：首先，汉武帝时期实行了政治清明的统治，重视儒学思想，将其视为国家的官方学说，从而提升了儒学的地位；其次，董仲舒提出“罢黜百家，独尊儒术”的观点，使得儒学成为主流学术；最后，儒家思想适应了当时社会现实的需要，提出了以仁义礼智为核心的教育思想，得到了社会各阶层的认可和支持。这些因素共同促成了儒学在汉代的地位变化。	先秦至汉代儒学地位的变化可以说是从被打压到得到承认和推崇的过程。在先秦时期，儒学一直处于边缘地位，默默无闻，未能得到社会的广泛认可和推崇。这主要是因为在战国时期，社会动荡不安，各国争霸，实行儒家所提倡的仁政并不现实，儒家的思想很难在这种混乱的局势下得以实践和推广。 然而，随着西汉经过了文景之治的时期，社会逐渐安定下来，经济繁荣，国家变得富强起来。在这种背景下，汉武帝采纳了董仲舒的建议，开始“独尊术”，将儒家学说确立为封建社会的正统思想。这种变化的原因在于统治者需要一种有利于维护社会稳定和统治秩序的思想体系，而儒家所提倡的仁政、礼乐、忠恕等观念正符合这种需要。因此，儒学在汉代得以崛起，成为中国封建社会的主流思想，对社会的影响也变得更加深远和持久。	b	b	先秦至汉代儒学的地位经历了显著的变化，这些变化可以从材料二中韩非子的观点和历史事件中窥见一二。 在先秦时期，儒学虽然是“世之显学”，但并非统治阶级的官方思想。孔子周游列国宣传自己的学术理想，未能取得成功，反映出儒学在当时并未成为统治阶级的主导思想。孟子时代，儒学面临着来自杨朱、墨翟等其他学派的竞争，说明儒学在思想领域并非无可挑战。秦始皇的焚书坑儒政策更是直接剥夺了儒学在政治上的地位。 然而，到了汉代，尤其是汉武帝时期，儒学的地位开始得到提升。董仲舒提出的“五经”成为法定的经典，儒学开始被纳入官方的教育体系和政治制度中。董仲舒的“邪辟之说灭息，然后统纪可一而法度可明，民知所从矣”主张，强调通过儒学的教化来统一思想和行为，进一步巩固了儒学的地位。 这一变化产生的原因主要有以下几点： 1. 政治需要：汉武帝需要一个稳定的思想基础来巩固其统治，儒学的传统文化和伦理道德观念能够为其提供合理化的支持…	根据材料二所述，先秦至汉代儒学地位经历了起伏变化。在先秦时期，儒学虽然被韩非子称为显学之一，但孔子和孟子等儒家思想家在当时并没有获得太大的影响力，而墨家等学派更为流行。同时，秦始皇实行了“焚书坑儒”的政策，对儒家学说造成了重大打击。直到汉代初期，董仲舒提出“邪辟之说灭息”的主张，使儒学逐渐复兴，成为法定经典。 这种地位变化的原因可以从多个方面来解释。首先，先秦至汉代社会的政治、经济等方面发生了巨大变化，导致了不同学派的兴起与衰落。儒家所强调的仁义道德、礼乐制度等在这种社会背景下更加符合人们对社会秩序和伦理道德的需求，因此在汉代得到了更多的认可。其次，个别君主对儒学的态度也对其地位产生了影响。比如汉武帝对董仲舒的重视和支持，使得儒学得以在政治上占据重要地位。最后，儒学本身在适应时代需求的同时也在不断发展和完善，使得其思想更加深入人心，获得更多人的认同与支持。 综上所述，先秦至汉代儒学地位的…	b	b	b	b	b	b	why
《史记·秦本纪》中曰：“秦王政立二十六年，初并天下为三十六郡，号为始皇帝。”其国家的形态结构与夏商西周最大的区别就在于:在全国范围内废除诸侯,建立起单一的由中央政府直接管辖的郡、县二级地方行政体制，这是一种“中央—郡县”一元化的行政体制。全国境内的“多民族”被纳入都县这样的行政管辖范围之内，由行政管理所带来的政治上的统合可打散乃至融化族群上的差异。郡县控制了地方，有利于集权和统一。摘编自王震中《“大一统”思想的由来与演进》	根据材料二并结合所学知识，概述郡县制的特点及其影响。	特点包括中央垂直管理地方、郡县长官由皇帝任免调动以及实行官僚政治。影响是强化了对地方的控制、加强了中央集权、有利于维护国家的统一并对此后2000多年的中国政治与社会产生了重要影响。	郡县制的特点是在全国范围内废除诸侯，建立起“中央一郡展”的一元化行政体制。这一制度的影响主要体现在两个方面：一是一定程度上打散乃至融化族群上的差异，促进了民族融合；二是通过郡县控制地方，加强了中央集权，维护国家统一。	有利于加强中央政府对地方的控制和管理，提高行政效率和统一管理水平。同时也可能导致地方官员的权力过大，容易产生腐败和滥用职权的问题。	a	a	郡县制是中国古代的一种地方行政体制，它在秦朝被广泛推行，并对后世产生了深远的影响。其特点主要包括： 1. 中央集权：郡县制下，中央政府对地方实行直接管辖，废除了诸侯国的存在，实现了中央集权。这意味着中央政府拥有对全国的绝对控制权，地方官员对中央的依赖性增强。 2. 二级行政区划：郡县制将全国划分为较大的郡和较小的县两个层级，这种划分有助于更有效地管理和统治广阔的领土。 3. 行政管理的统一：郡县制下，全国范围内的行政管理体系趋于统一，减少了地方的自治权，提高了行政效率。 4. 政治统合：郡县制的实施有助于打散和融化民族和地区的差异，通过行政管理的方式实现了政治上的统合。 5. 法律和制度的统一：秦朝实行了严格的法律和制度，郡县制的推行有助于在全国范围内推广和执行这些法律和制度。 郡县制的影响主要体现在： - 加强了中央政府的控制力，促进了国家的长期稳定和统一。 - 促进了文化、经济和法律…	郡县制是秦始皇建立的一种中央集权的地方行政体制。其特点包括废除诸侯，建立由中央政府直接管辖的郡、县二级地方行政体制；将全国范围内的多民族纳入都县的行政管辖范围之内，通过行政管理实现政治统一；加强了中央对地方的控制，有利于集权和统一。这种体制的实施使得地方行政更加统一和规范，减少了地方豪强的势力，有利于国家的统一和稳定。同时，也为后来中国的封建制度奠定了基础，成为中国封建制度的一个重要特点。总体来说，郡县制的实施对中国古代政治制度和社会结构产生了深远的影响。 。	b	a	a	b	a	a	what
唐代租庸调税制的特点是“有田则有租，有家则有调，有身则有庸”。在这种税制下，皇室贵成、官僚贵族、孝子顺孙、义夫节妇、透户流民为了生存投靠地主豪强做荫户,不承担国家的租税徭役。由此,只有30%至50%的户和14%的人口承担国家的全部租税,租税负担处于极不合理状态。建中元年(780年),德宗下令:“令黜陟观察使及州县长官,据旧征税数,及人户土客,定等第钱数多少,为夏、秋两税”。两税法在预算上实行“量出为入”的原则。每年财政经费先计算数额,然后按照各地的土地、人口、条件等实际情况进行分配,分配时坚持贫富有差，税负均等。这一原则防止了地方官吏强取豪夺,多收多征,加重民众的负担。	根据材料二并结合所学知识，指出唐代两税法实施的背景，并说明其引发的赋税变化。	背景包括土地兼并盛行、均田制遭破坏、租庸调制无法推行和国家财政收入减少。变化是征税标准以资产为主、征税时间固定、税收明目简化、收税对象增加以及赋税衡量权进一步上归朝廷。	唐代实施两税法的背景是在推翻了租庸调制之后。在这种背景下，税收制度发生了变化。原先的税收制度是以身份为依据的，而在实施两税法之后，采用了“量出为入”的原则。在税收分配方面，坚持了贫富有差，税负均等的原则，这样可以防止地方官吏强取豪夺，多收多征，进一步加重了民众的负担。	唐代实施两税法的背景是由于租庸调制制度的完全废弃，导致许多人为了生计成为地主豪强的荫户，不承担国家的租税摇役，使得少部分人承担了国家全部税收，造成了租税负担严重不合理的情况。这种情况下，需要进行赋税制度的变革。 实施两税法后，不再只以丁身为依据，不考虑其他因素，也不考虑百姓实际占有土地的情况，而是根据各地的土地、人口、条件等实际情况进行分配，坚持贫富有差，税负均等的原则。这样使得赋税更加公平合理，减轻了贫苦百姓的税负，也增加了国家税收的稳定性和可预测性，有利于社会的稳定和发展。	b	b	唐代两税法的实施背景主要是为了解决唐代租庸调税制下出现的极不合理的税收负担问题。在租庸调税制下，仅有30%至50%的户和14%的人口承担国家的全部租税，而其他人则通过成为荫户来逃避徭役和税收。这种情况导致了税收的极不均等，民众的负担过重，地方官吏也趋向于强取豪夺，增加民众的负担。 两税法的实施是对这种情况的一种改革，它在预算上实行了“量出为入”的原则，即先计算财政经费数额，然后根据各地的土地、人口、条件等实际情况进行分配，坚持贫富有差，税负均等。这一原则有助于防止地方官吏的滥用权力，减轻民众的税收负担，实现税收的合理分配。 两税法实施后，赋税的变化主要体现在以下几个方面： 1. 税收的合理化：两税法通过统一税收的征收方式，减少了税收的不公平性，实现了税收的合理化。 2. 税收的减轻：通过减少地方官吏的权力，防止了税收的滥收，减轻了民众的税收负担。 3. 税收的规范：两税法明确规定了税收的…	唐代两税法实施的背景主要是租庸调制度的不合理性，导致只有少部分人负担了大部分的租税，造成了社会财富的不公平分配。为了解决这一问题，德宗下令实行两税法，根据各地实际情况进行税收的分配，坚持贫富有差，税负均等的原则，防止了地方官吏滥用职权多收多征，减轻了民众的负担。由于两税法的实施，赋税的变化在于实现了贫富之间的税负均等，减轻了底层人民的负担，同时也加强了中央政府对财政的控制，提高了税收的效率和公平性。 。	a	b	b	b	b	b	what
材料一 希腊的自然地理环境和其城邦的鲜明个性,使古代希腊有关对人的价值的看法沿着一条人本主义的道路发展。而吹响古代西方人类精神觉醒之号角的,应该是古希腊的智者学派。笔者认为古代西方人文主义最为显著的特点也就是古代中国的人道主义所没有的,那就是尊重人的个体价值和从人的自然性上得出的人生而平等的思想。这些特点在以后历史发展过程中日益发展成熟,构筑了以后西方的人文主义传统和价值观念。春秋战国时期民本思潮主要有两点:在人与自然关系(即天人关系)方面,突出人的地位和作用:在人类社会关系(主要体现为君---民关系)方面,特别强调民的作用。以时间顺序来看,前者体现于春秋时代,后者则勃兴于战国时期。	根据材料一、二,对比中西方思想家对“人”的认识的异同。	相同点是都认识到了人的地位和作用体现了人类精神的觉配。不同点在于西方思想家强调人的个体价值，中国思想家强调人的群体价值；西方思想家从人的自然本性出发倡导人人平等思想，中国思想家从统治阶级的立场和利益出发提倡民本思想，更具有等级色彩。	对于不同点来说，西方思想家更加尊重人的个体价值，沿着人文主义的道路不断发展。他们注重从人的自然状态中得出人生而平等的思想。而中国思想家对理性思考以及人性方面的研究相对较少。 然而，在相同点方面，西方的人文主义与中国的民本思潮都体现了人的重要性。两者都强调了人的重要性，尊重人的价值，并且都试图探讨人类的本质和意义。	根据材料一、二的比较可知，西方思想家强调人生而平等，而中国思想家则强调君民关系。西方的人文主义强调以人为本，而中国的道家思想强调天人合一。此外，中国注重整体，而西方注重局部。然而，两者的共同点在于都强调了人的作用，并且都受自然地理环境的影响。	a	a	根据材料一和二，我们可以对比中西方思想家对“人”的认识，发现一些异同之处。 在中西方思想中，对“人”的认识有着不同的侧重点和发展轨迹。古代希腊的自然地理环境和城邦的鲜明个性促使希腊思想家沿着人本主义的道路发展，特别是智者学派的思想家，如赫拉克利特和普罗泰戈拉，他们强调人的理性和个体价值，认为人的自然状态是平等的。这种思想在后来的西方哲学中有着深远的影响，例如古罗马哲学家塞内卡和现代哲学家如约翰·洛克，都在不同程度上继承和发展了这种人本主义的思想。 相比之下，古代中国的思想家，如孔子和荀子，他们的思想更侧重于社会秩序和人与自然的和谐关系。孔子强调“仁”和“礼”来规范人与人之间的关系，而荀子则认为人的本性是“好恶”，需要通过礼教来修正。这种思想更注重社会秩序和人与社会关系的和谐，而不是像希腊哲学那样强调个体价值和自然平等。 在春秋战国时期的中国，民本思潮也出现了，但它更多地关注于人与自然的关…	根据材料一和材料二，可以看出中西方思想家在对“人”的认识上有一些异同之处。在西方，古希腊的智者学派强调尊重人的个体价值和人生而平等的思想，体现了人本主义的精神。而在中国，春秋战国时期的民本思潮则突出了人在自然和社会关系中的作用，特别强调了民众的作用。可以看出，西方思想更加强调个体的独立和平等，而中国思想更着重于人在整体社会中的角色和作用。不过，两种思想都强调了人的重要性和价值，只是侧重点略有不同。 举例来说，古希腊哲学家苏格拉底强调了个体的思维和自我认知的重要性，而中国的孔子则注重了人在家庭和社会中的角色和义务。这些思想家们虽然在强调方面有所不同，但都体现了对人的重视和尊重。 总的来说，中西方思想家对“人”的认识都体现了人本主义的精神，尊重人的价值和作用。只是在强调的方面有所不同。	b	a	a	b	a	a	what
材料二 春秋时的诸子百家所研究的基本上是围绕如何治国平天下,如何统治人民的经术,也就是王道和霸道之辩;对于自然科学的研究是比较少的,对于个人理性思考方面以及人性方面的研究也是很少的。中华文明的思维注重整体,考虑各个因素之间的相互联系,是一种整体观的思维，	综合以上材料并结合所学知识，谈一谈你对人类文明发展的认识。	人类文明的发展具有统一性和多样性，不同文明都对人类文明的发展做出了重要贡献，推动了人类文明的发展。我们应尊重和借鉴不同地区不同文明的成果。	人类文明的发展受到自然地理环境和文化影响。随着历史的推移，人类文明逐渐变得更加成熟。不同的时期，人类文明也会呈现出多元化的特点。而不同的政治制度也会影响人类文明的发展方向和特点。因此，人类文明的发展是一个复杂而多样化的过程，需要不断地探索和发展，以推动人类社会的进步和发展。	人类文明的发展离不开文化的交流，这是其重要基础。我们应该注重整体思考，考虑各个地区人类文明之间的相互联系，尊重每个文化的独特价值，并且在融合各地区文化的过程中实现共生共荣。将世界连为一个整体有利于人类文明的发展，促进不同文化之间的交流与合作，推动人类文明走向更加繁荣与进步。	a	a	人类文明的发展是一个复杂而漫长的过程，它涉及到文化、科技、哲学、艺术等多个层面。从古代到现代，人类文明经历了不同的阶段，每个阶段都有其独特的特点和贡献。 在古代，诸如春秋时期的中国，诸子百家如孔子、孟子、荀子等人主要关注的是如何治理国家、统治人民以及如何成为一个完美的君子。他们的思想和理论对于后世的政治、伦理、教育等方面产生了深远的影响。然而，自然科学和个人理性思考方面的研究在当时相对较少，这可能是因为当时社会的主要任务是维持社会秩序和防御外来侵略。 随着时间的推移，特别是在近现代，人类文明开始更加注重科学和技术的发展。工业革命带来了生产力的巨大飞跃，科学发现和技术创新成为推动社会进步的主要力量。同时，个人理性思考和人性研究也变得更加重要，哲学、心理学、社会学等学科的发展帮助人们更好地理解自己和社会。 整体观的思维方式在中华文明中有着深厚的根基，这种思维方式强调了事物之间的相互联系和整体…	人类文明的发展是一个不断演进的过程，涵盖了政治、经济、社会、文化等多个方面。从材料中可以看出，古代中国的思维注重整体，考虑各个因素之间的相互联系，这种整体观的思维在人类文明的发展中起着重要作用。人类文明的发展需要不断探索和创新，不仅要注重政治和经济的发展，还需要关注人类的理性思考和人性方面的研究。 在人类文明的发展过程中，不同文明之间的交流和融合也起着重要作用。通过文明的交流，人们可以相互学习借鉴，促进文明的进步，实现各个文明之间的共同发展。同时，人类文明的发展也需要注重环境保护和可持续发展，保护地球资源，实现人类与自然的和谐共处。 总的来说，人类文明的发展是一个综合性的过程，需要整体观的思维方式，多方面的探索和创新，以及不同文明之间的交流与融合。只有这样，人类文明才能不断发展，实现持久繁荣和和谐共存。 。	b	a	a	a	a	a	others
材料一 通过一百多年的征服,阿拉伯人建立起地跨亚、非、欧三洲的大帝国,结束了这些地区长期的混乱局面,促进了工农业的恢复和发展,为商品生产和商旅往来提供了条件。这个帝国不仅控制了东西方的主要商道,取得了在东西方贸易中的决定性优势,而且以它强大业看作国家税收的重要来源,大力保护商业活动,统一货币。的中央集权统治保证了国内外贸易活动的正常进行。阿拉伯帝国是政教合一的国家,伊新兰教认为商业是真主喜爱的事业。帝国政府把商摘编自戴小江《阿拉伯帝国商业繁荣的原因》	根据材料一,概括阿拉伯帝国商业繁荣的原因。(6分)	原因包括帝国实行中央集权统治政局稳定、国内工商业经济的恢复和发展、控制了东西方的主要商道、帝国政府对商业的重视和扶植以及伊斯兰教文化的影响。	阿拉伯帝国商业繁荣的原因在于连年征战建立起了地跨亚非欧三洲的帝国，结束了长期混乱局面。同时，他们控制了东西方的主要商道，征收税物，实行政教合一，政府把商业看作税收来源，大力发展和保护商业。此外，工农业的恢复和发展也为商品生产和商旅来往提供了条件。	阿拉伯帝国商业繁荣的原因包括国家统一结束混乱局面，为商业贸易提供了良好的社会环境；工农业的恢复促进了商品生产和商旅往来；控制了商道，在东西方贸易中取得了决定性优势；宗教影响使得商业受到伊斯兰教的喜爱；政府的支持包括统一货币和大力保护商业，促使其长期发展。	b	b	阿拉伯帝国商业繁荣的原因主要有以下几点： 1. 长期的征服和统一：阿拉伯人通过一百多年的征服，建立起跨越亚、非、欧三洲的大帝国，结束了这些地区长期的混乱局面，创造了一个稳定的商业环境。 2. 工农业的恢复和发展：阿拉伯帝国的建立促进了工农业的恢复和发展，为商品生产提供了坚实的基础。 3. 主导东西方主要商道：阿拉伯帝国控制了东西方的主要商道，取得了在东西方贸易中的决定性优势，促进了商品的流通和商业活动的发展。 4. 国家税收的重要来源：帝国的强大经济实力使其成为国家税收的重要来源，政府能够大力保护商业活动，创造了一个有利于商业发展的环境。 5. 统一货币：阿拉伯帝国统一货币制度有助于简化交易，降低交易成本，促进了商业活动的流畅进行。 6. 中央集权统治：中央集权的统治保证了国内外贸易活动的正常进行，提供了稳定的政治环境。 7. 政教合一和对商业的鼓励：阿拉伯帝国是政教合一的国家，伊斯兰教…	根据材料一,阿拉伯帝国商业繁荣的原因主要包括以下几点：通过征服建立起地跨亚、非、欧三洲的大帝国，控制了东西方的主要商道，取得了在东西方贸易中的决定性优势；以强大的商业看作国家税收的重要来源，大力保护商业活动，统一货币，中央集权统治保证了国内外贸易活动的正常进行；政教合一的国家，伊斯兰教认为商业是真主喜爱的事业，因此帝国政府积极推动商业发展。综上所述，阿拉伯帝国商业繁荣的原因在于其政治、宗教、和经济体系的相互配合，为商品生产和商旅往来提供了条件，促进了工农业的恢复和发展。 .	a	b	b	a	b	b	what
材料二 阿拉伯文化对世界文化发展的推动作用是巨大的。9世纪初兴起的“百年翻译运动”是翻译史上的伟大工程，大批阿拉伯的研究者翻译、注释了古希腊、印度和罗马的著作,使人类古典文明的辉煌成果得以继承。这些翻译著作还引发了欧洲的文艺复兴运动。阿拉伯人不但善于吸收其他文化，而且还在钻研的基础上加以发展，在数学、天文学、医学、物理学、化学、建筑学、文学、地理等领域，都取得了巨大成就。阿拉伯人把古印度、中国文化成就介绍到西方,又把阿拉伯的天文医学知识和伊斯兰教传播到中国等东方国家，这对于东西方文化的交流起到了很大的促进作用。	根据材料二并结合所学知识,简要说明阿拉伯文化对世界文化发展的推动作用。	作用是保存并传播了西方古典文化、为欧洲的文艺复兴提供了思想文化来源、推动了世界科学的发展、成为东西方文化交流的桥梁并促进了东西方文化的交流。	阿拉伯文化对世界文化发展起到了推动作用。它使人类古典文明成果得以继承，推动了欧洲的文艺复兴运动，吸收并融合其他国家优秀文化，促进了各个领域的知识发展。同时，阿拉伯文化也保存并传播了古代文化，成为东西方文化之间的桥梁。	阿拉伯文化在世界文化发展中发挥了重要推动作用。首先，阿拉伯人的“百年翻译”运动使人类古典文明得以继承，引发了文艺复兴运动。其次，在数学、天文学、医学、地理等领域取得了重大成就，为世界科学发展做出了贡献。此外，阿拉伯人的商人和旅行家作为东西方交流的桥梁，促进了东西方文化的交流。他们还传播了印度数学，被称为“阿拉伯数学”，在数学领域取得了突出成就。此外，阿拉伯人收集了大量各国历史资料及故事，为后世提供了重要资料。最后，阿拉伯文化培养了大批具有丰富精神食粮的人才，为西方文艺复兴提供了重要的人才资源。因此，阿拉伯文化对世界文化发展起到了积极推动作用。	a	a	阿拉伯文化对世界文化发展的推动作用是显著的，尤其是在“百年翻译运动”这一历史时期。从9世纪初开始，这一运动汇聚了大量的阿拉伯学者，他们致力于翻译和注释古希腊、印度和罗马的著作。这些翻译工作不仅保留了人类古典文明的宝贵遗产，而且还促进了知识的传播和文化的交流。 例如，通过这些翻译工作，欧洲学者得以接触到古希腊哲学家如亚里士多德的作品，这对欧洲的文艺复兴运动产生了深远的影响。阿拉伯学者在数学、天文学、医学、物理学、化学、建筑学、文学和地理等领域的成就，也为世界文化的发展做出了巨大贡献。他们不仅吸收了其他文化的精髓，还在此基础上进行了创新和发展。 此外，阿拉伯人还在东西方文化交流中起到了桥梁的作用。他们将古印度和中国的文化成就介绍到了西方，同时将阿拉伯的天文医学知识和伊斯兰教传播到了东方国家。这种文化的互动和融合，促进了世界各地文化的繁荣和发展。 总之，阿拉伯文化通过翻译运动、学术贡献和文化交…	阿拉伯文化在世界文化发展中发挥了重要的推动作用。通过“百年翻译运动”，阿拉伯研究者将古希腊、印度和罗马的著作翻译成阿拉伯文，使人类古典文明的辉煌成果得以传承。这些翻译著作不仅在阿拉伯地区推动了科学、文学、建筑等领域的发展，也在欧洲引发了文艺复兴运动。同时，阿拉伯人还在数学、天文学、医学、物理学、化学、建筑学、文学、地理等领域取得了巨大成就，将古印度、中国文化成就介绍到西方，同时也将阿拉伯的天文医学知识和伊斯兰教传播到中国等东方国家，促进了东西方文化的交流与融合。因此，可以说阿拉伯文化对世界文化发展起到了重要的推动作用。	a	a	a	a	a	a	what
材料一 16世纪时,中国已是一个银本位的社会。但是,中国银的储量极其匮乏。与此相对，西班牙美洲殖民地盛产银矿，光是秘鲁银矿，1581-1600 的产量就占当时世界总产量的 60%以上，丰富的银产量使银的价格逐步跌落。因此,当西班牙人将白银运往马尼拉之后,中国商人便蜂拥前去了，由于中国银价昂贵，以银标示的丝价很低，中国的产品贩运到马尼拉能获100%的利润,而马尼拉大帆船将其贩运到美洲，获利仍可高达 100%—300%。西班牙占领美洲以后，大量的人员投入到殖民、征服以及开发金银矿山的活动中,造成了本国制造业与农业的衰落，西班牙不得不从其他国家进口大量制造业产品。此时,明朝则具备了强大的供给能力。嘉靖时期发生的倭患,使明廷意识到完全海禁已不能适应形势需要,于是隆庆元年有限地开放了海禁。于是，“丝-银贸易”得以迅速发展起来。——摘编自王涛《明至清中期中国与西属美洲丝银贸易的演变及其影响因素》	根据材料一并结合所学知识，概括“丝---银贸易”兴起的主要历史背景。(6分)	历史背景包括地理大发现和新航路的开辟、中西方经济结构的差异、西方重商主义经济政策的刺激、明朝农业和手工业发达以及隆庆开关政策的推动。	明朝时期，西班牙人将大量白银运往马尼拉，中国商人纷纷前来采购。同时，西班牙在美洲的殖民统治导致本国制造业和农业的衰落，迫使他们寻找新的贸易伙伴。此时，明朝在面临倭患的压力下有限开放了海禁，为“丝一银贸易”的兴起提供了机会。这一历史背景使得“丝一银贸易”得以迅速发展起来，成为当时重要的贸易活动。	“丝---银贸易”兴起的主要历史背景是：处于新航路开辟的时期，各殖民国家扩张殖民地，世界正播兴起人口迁移和物种交换。同时，指南针和地圆说的出现，季风、洋流知识的丰富，以及造船技术的提高，都为“丝---银贸易”的兴起提供了有力的支持。此外，西方强大国家王室的支持也为这一贸易活动的发展起到了促进作用。	b	b	根据材料一和结合所学知识，“丝-银贸易”兴起的主要历史背景可以概括为以下几点： 1. 中国为银本位社会，但银储量极其匮乏，导致银价昂贵。与此同时，西班牙美洲殖民地的银矿产量丰富，导致银价下跌。 2. 西班牙人运送白银至马尼拉后，中国商人趁机大量购买，利用中国银价昂贵和以银标示的丝价低廉，进行丝绸产品的出口贸易，获得高额利润。 3. 西班牙在美洲的殖民活动导致本国制造业和农业的衰落，迫使西班牙大量进口其他国家的制造业产品，这为中国的出口产品提供了市场需求。 4. 明朝由于嘉靖时期的倭患，明廷意识到完全的海禁政策已经不能满足国家的需要，因此在隆庆元年开始有限地开放海禁，允许一定程度的对外贸易。 5. “丝-银贸易”的兴起是中国和西属美洲之间经济互动的结果，反映了当时全球贸易网络的扩展和经济全球化的初步趋势。	"丝-银贸易"兴起的主要历史背景是中国银储量匮乏，西班牙美洲殖民地盛产银矿，导致银价逐步下跌。西班牙将大量白银运往马尼拉，中国商人因中国银价昂贵而前往购买银，使得丝绸在马尼拉的价格较低。中国产品运往马尼拉能获得高额利润，而马尼拉大帆船将其运往美洲，获利更高。西班牙殖民地开发金银矿山导致本国制造业与农业衰落，需要从其他国家进口产品。明朝具备强大供给能力，隆庆元年开放了海禁，促进了丝-银贸易的迅速发展。 "	a	tie	tie	a	b	b	what
材料二 据估算,自隆庆元年(1567)后的数十年间,漳州与马尼拉的贸易大约增长了 8 至 10 倍。中国商品不仅畅销，而且利润颇高。特别是当阿卡普尔科帆船比中国商船早到马尼拉时，中国商人习惯于将价格提高 1 倍。最重要的是，由于菲律宾几无物产可交换，而西班牙人除了美洲的白银以外，也没有其他令中国人渴求的物品，所以，中国商船载回的基本上是白银，这些白银在一定程度上满足了明中叶以后中国对白银的大量需求。中菲贸易促进了中国商品经济的发展,增加了就业机会。随着海外贸易的蓬勃展开，不少中国人移居吕宋，在某种程度上缓解了国内因人口过剩而招致的生计压力。此外,万历年间从菲岛引进中国的番薯、烟草等作物均成为重要的农业经济作物。	根据材料一、二并结合所学知识，分析“丝--—银贸易”对当时东西方社会产生的影响。(8分)	影响是推动了菲律宾经济的发展、为中国人提供了大量的就业机会、客观上缓和了中国的人口压力、促进了商品经济的发展、有利于东西方经济文化的交流和西方社会的资本原始积累。	根据材料一、二以及所学知识分析，“丝绸—银贸易”对当时东西方社会产生的影响主要体现在以下几个方面：首先，这种贸易促进了中国资本主义的萌芽和进步。其次，由于“丝绸—银贸易”带来了大量的银元流入中国，进而提高了粮食产量，丰富了人们的饮食。第三，这种贸易活动推动了工商业的发展，促进了经济的繁荣。第四，由于“丝绸—银贸易”主要集中在沿海沿岸地区，因此也刺激了这些地区的经济发展。最后，这种贸易活动还促进了人口的增长，为社会的发展创造了更多的劳动力资源。综上所述，“丝绸—银贸易”对当时东西方社会产生了深远的影响，推动了经济和社会的发展。	通过丝银贸易，中国商品在西方市场上畅销，推动了中国的商品经济发展。大量白银流入中国，缓解了货币紧张问题，使得货币充沛，进而引发了中国的币制改革。商品经济的发展增加了中国的就业机会，缓解了人口的生计压力。同时，从外引进的经济作物成为重要农业经济作物，增加了粮食产量。丝银贸易也有助于推动西方经济的发展。这种贸易往来促进了不同文明之间的交流与合作，为世界经济的繁荣做出了重要贡献。	tie	a	根据材料一、二和结合所学知识，我们可以分析“丝—银贸易”对当时东西方社会产生的影响。 首先，“丝—银贸易”是指中国出口丝绸等商品到西班牙在美洲的殖民地，换取白银。这种贸易关系在当时是非常重要的，因为中国的丝绸在西班牙等国家非常受欢迎，而西班牙的白银则是中国所需的重要商品之一。 这种贸易对东西方社会产生了以下几个方面的影响： 1. 经济影响：丝绸的出口为中国带来了大量的外汇收入，特别是白银，这对于满足中国对白银的需求非常重要。白银不仅用于货币流通，也是中国传统的财富象征。同时，白银的流入也促进了中国的经济发展，增加了就业机会。 2. 社会影响：丝—银贸易促进了中国商品经济的发展，推动了中国与世界的经济联系。同时，这也促进了中国人口的流动，许多中国商人和移民前往菲律宾等地从事贸易活动，缓解了中国国内人口过剩带来的生计压力。 3. 文化影响：丝—银贸易还促进了文化的交流。例如，菲律宾岛上的番薯…	根据材料一、二以及所学知识，可以看出“丝--—银贸易”对当时东西方社会产生了多方面的影响。 首先，这种贸易促进了中国商品经济的发展，增加了就业机会，推动了中国社会的繁荣。中国商品在海外市场畅销，利润颇高，这也带动了中国的制造业和商业的发展。 其次，这种贸易也对西方社会产生了影响。西方社会对中国商品的需求推动了海上贸易的发展，尤其是在马尼拉与中国之间的贸易。同时，西方社会的需求也带动了对白银的大量需求，这在一定程度上满足了中国对白银的需求，对中国经济起到了支撑作用。 另外，这种贸易也促进了中西文化的交流。随着中国商品的输出，中国文化也传播到了西方社会，同时西方文化也逐渐进入中国。这种文化交流对双方社会的发展和进步都起到了积极的作用。 总的来说，“丝--—银贸易”对当时的东西方社会产生了积极影响，推动了经济发展、文化交流，促进了社会的繁荣与进步。	a	b	b	b	a	a	why
材料一： 自明朝中期起，高产作物玉米、番薯、马铃著自海外传入中国，它们不仅单位亩产量大，而且适应性强，不与五谷争地。明清时期，棉、麻、桑、茶、甘蔗、蔬菜、果树的种植日益广泛，产品大量流入市场。-摘编自张帆《中国古代商史（第二版》》	根据材料一，结合所学归纳这一时期社会经济“新”发展的表现。	表现是美洲高产作物引入中国，江南等地区农业多种经营方式兴盛，经济作物品种繁多，很多农民还兼营产品初级加工或相关副业。	根据材料一所述，这一时期社会经济呈现出了一些新的发展表现。首先，大量外来高产作物的引入，使农民在满足自身需求的同时还有余粮，这推动了商品经济的发展。其次，商品经济的发展又进一步推动了全体社会经济的发展。可以看出，这一时期社会经济的“新”发展表现主要体现在农作物引进带来的农产品丰富和商品经济的兴起，这些现象相辅相成，共同推动了社会经济的发展。	在明朝中期，海外引进了高产作物，这些作物亩产量大，适应性强，不与传统五谷争地。到了明清时期，棉花、麻、桑、茶、甘蔗、蔬菜、果树的种植日益普及，大量产品涌入市场。	a	a	根据材料一，我们可以看到自明朝中期起，中国的农业和经济出现了一系列的新发展。首先，玉米、番薯和马铃薯等高产作物的引入极大地提高了农业生产效率和产量，这些作物不仅单位亩产量高，而且适应性强，不与传统的五谷作物争地资源。这种变化为社会提供了更多的粮食资源，减轻了土地的压力。 其次，棉、麻、桑、茶、甘蔗、蔬菜和果树等作物的种植日益广泛，这表明中国的农业生产已经开始多元化，种植结构发生了变化。这些作物不仅能够满足国内市场的需求，还能够出口到其他地区，促进了国际贸易的发展。 此外，随着产品的多样化和产量的增加，市场需求也在不断增长，这为商业活动的发展提供了良好的条件。商人可以通过种植、加工、贩卖这些作物和产品来获取利润，商业资本的积累和商业活动的扩展为社会经济的发展奠定了基础。 总的来说，这一时期社会经济的“新”发展表现为农业生产的提高、农业结构的多元化、市场需求的增长以及商业活动的兴盛。这些变化…	根据材料一，我们可以看到在明清时期，中国社会经济出现了一些新的发展表现。首先，高产作物如玉米、番薯、马铃著的引入，增加了农作物的种类，提高了农业产量，有助于解决粮食问题。其次，棉、麻、桑、茶、甘蔗、蔬菜、果树的种植也日益广泛，这表明农业生产结构逐渐多样化，农产品种类丰富，市场供应量增加。这些发展表现说明明清时期中国社会经济开始呈现出多元化、丰富化的趋势，农业生产水平有所提高，市场经济逐渐兴盛。	a	b	b	a	a	a	what
材料二：清朝皇帝在写给英国国王的手谕中说：天朝物产丰盈，无所不有，原不借外夷货物以通有无。特因天朝所产茶叶、瓷器、丝斤为西洋各国及尔国必需之物,是以加恩体恤……今尔国使臣于定例之外多有陈乞,大乖仰体天朝加惠远人、抚育四夷之道。且天朝统驭万国，一视同仁，即在广东贸易者亦不仅尔英吉利一国，若俱纷纷效尤，以难行之事妄行干渎，岂能曲徇所请？念尔国僻居荒远，间隔重瀛，于天朝体制原未谙悉。是以命大臣等向使臣等详加开导,遣令回国……《清高宗实录》卷 1435 乾隆五十八年八月己卯	根据材料二，结合所学，概括英国使团对消政府提出了怎样的要求？并从对外政策的角度，概述清政府对此的回应。	英国要求扩大对华贸易开拓中国市场，回应是清朝统治者仍以“天朝上国”自居对外闭关锁国。	要求于定例之外有陈气	要求②需要清朝所生产的瓷器茶叶等特产.②开放海外贸易的限制:①清朝众人狂妄自大以为自己实力很强②缺乏对外国发展的认识、固步自封、②没有认识到对外交流的重要性	b	b	根据材料二，英国使团在定例之外多有陈乞，提出了一系列要求，这些要求可能包括但不限于贸易协议的扩展、更优惠的贸易条件、对英国商品的更大市场开辟等。英国作为一个僻居荒远的国家，间隔重瀛，对于清朝的体制可能并不完全了解，因此在贸易和外交方面可能会提出一些特殊的要求。 从对外政策的角度来看，清政府对此的回应是坚持一视同仁的原则，即使是广东贸易中的英国，也不应独占特权。清政府认为，如果允许英国或其他国家无限制地提出要求，将会违背了加惠远人、抚育四夷的原则。因此，清政府命大臣等向使臣详加开导，遣令回国。这一回应体现了清政府在对外交往中坚持的平等和自主原则，同时也体现了清朝统治集团对于中央集权和统治秩序的重视。	根据材料二，英国使团对清政府提出了多次乞求增加贸易额度的要求。他们希望清政府能够开放更多的贸易渠道，以满足英国对茶叶、瓷器、丝绸等商品的需求。然而，清政府在手谕中表示，虽然天朝物产丰富，但并不需要依赖外国商品，因此并不愿意随意增加贸易额度。清政府认为，如果所有国家都纷纷提出类似要求，将会破坏天朝的贸易体制，违背对外政策的原则。因此，清政府决定不随意满足英国使团的要求，而是要求他们回国并对他们进行开导，以维持天朝的贸易规则和对外政策。 。	b	b	b	b	b	b	what
材料一： 自明朝中期起，高产作物玉米、番薯、马铃著自海外传入中国，它们不仅单位亩产量大，而且适应性强，不与五谷争地。明清时期，棉、麻、桑、茶、甘蔗、蔬菜、果树的种植日益广泛，产品大量流入市场。-摘编自张帆《中国古代商史（第二版》》	根据材料一，指出清政府对签订《南京条约》的认识，并结合所学知识分析其原因。	清政府不认为《南京条约》是不平等条约，认为该条约使清政府获得了更多好处。原因是清政府长期闭关自守，坚持天朝上国、自大闭塞的观念，同时缺少近代外交经验。	清政府对签订《南京条约》的认识是不够清醒的，他们仍然沾沾自喜，认为这只是一件小事。这种认识的原因有两方面：一方面是清政府长期闭关锁国，自以为是，最终导致国家发展落后于他国，被迫接受屈辱性条约；另一方面是清政府官员对国家的发展状况认识不足，没有意识到《南京条约》的屈辱性。这种认识不足和自大狂妄的态度，导致清政府在面对外国的压力时，没有正确判断形势，最终导致了《南京条约》的签订。	清政府认为签订《南京条约》是一次外交上的巨大成功，把条约当作减轻管辖任务的方式。这种认识的原因在于清政府不愿意接受现实，希望通过签订条约来缓解压力，同时也是为了防止国人了解真相，避免引发起义运动。	a	a	根据材料一，并结合历史背景，清政府对签订《南京条约》的认识可能是出于对外国资本和技术的需求，以及对外国商品的依赖。明清时期，中国的农业生产已经取得了显著的进步，玉米、番薯、马铃薯等高产作物的引入极大地提高了粮食产量，同时棉、麻、桑、茶、甘蔗、蔬菜、果树的种植也日益广泛，产品大量流入市场。然而，这一时期的中国经济也面临着外部挑战，特别是随着鸦片战争的爆发，清政府意识到自身在军事、科技等方面的不足，开始寻求与外国的贸易和投资合作，以改善国内经济和军事实力。 《南京条约》的签订，标志着中国正式开启了对外开放的新时代，允许外国商人进入中国市场，引进外国资本和技术。清政府可能认为，这将有助于加速中国的现代化进程，通过吸收外国的先进技术和管理经验，促进国内产业的发展和生产力的提高。同时，通过与外国的贸易，清政府希望能够平衡国内外贸易的不平衡，减少对外国商品的依赖，同时也能够通过出口中国的产品来获取外…	清政府对签订《南京条约》的认识主要是认识到了中国在农业方面面临的挑战。随着海外高产作物的引入和农业产品的大量流入市场，中国传统的农业经济模式受到了冲击，许多农产品面临着竞争压力。因此，清政府意识到需要改革现有的农业政策和经济结构，以适应新的市场需求和农业生产方式。 此外，清政府还意识到需要与外国进行贸易往来，以获取更多先进的农业技术和资源，促进农业现代化。签订《南京条约》是为了开放贸易，引进外资和技术，以促进中国农业的发展和现代化。 因此，清政府认识到签订《南京条约》是为了应对农业领域的挑战，推动中国农业现代化进程，提高农产品的竞争力和产量。 。	b	a	a	a	a	a	what
材料一:从孔、墨开始,中国的学术思想空前活跃,思想文化异彩纷呈,群星璀璨,人才济济，史称百家争鸣的时代。这一时期和印度的佛陀时代，希腊的苏格拉底时代正好相当，有人把世界史上的这一时代成为“轴心时期”,是人类精神的大觉醒时期。—马克垚《世界文明史》	根据材料一,结合所学指出“百家争鸣”时期法家、墨家的代表人物及主张,并分析该运动对当时社会产生的影响。	代表人物韩非子主张以法为工具管理国家控制臣民体现中央集权的政治思想；墨子主张“兼爱”、“非攻”和尚贤。两者的思想为新兴地主阶级登上历史舞台奠定了思想理论基础。	在“百家争鸣”时期，法家的代表人物是韩非子，他主张以法为工具管理国家，强调法律的严明和执行。而墨家的代表人物是墨子，他倡导“兼爱”和“非攻”，主张以爱和和平来解决社会问题。 这场思想的较量对当时社会产生了深远影响。法家的主张为新地主阶级的出现奠定了基础，强调法律的约束和统治，为社会秩序的稳定提供了重要支持。而墨家的“兼爱”和“非攻”思想则对当时的战争和冲突产生了启发，引导人们追求和平与和谐，影响了社会的价值观和行为准则。因此，“百家争鸣”时期的法家、墨家思想在当时社会的发展中起到了重要作用，塑造了中国古代思想史的多元面貌。	法家代表人物是商鞅，主张“依法治国”。墨家代表人物是墨子，主张“兼爱、非攻”。这一时期的“百家争鸣”运动使中国学术空前活跃，思想文化异彩纷呈，群星璀璨，人才济济。同时，这一运动也促进了中国学术的繁荣。	a	a	在“百家争鸣”的时代，中国的学术思想确实在孔子和墨子之后迎来了空前的繁荣。法家和墨家是当时两大重要的学派，它们各自有着独特的代表人物和主张。 法家的代表人物主要有韩非子和李斯。韩非子（约公元前210-前233年）著有《韩非子》，其思想强调法治、严格的等级制度和中央集权。他主张通过严格的法律和行政手段来维护国家的秩序和统治。韩非子认为，法律是治国的根本，强调“法治”而非“人治”，认为通过法律来规范社会行为可以减少人为的偏见和错误。 李斯（约公元前280-前208年）是秦朝的重要顾问，他的思想继承了韩非子的法家思想，并在实践中应用。李斯主张“罢黜百家，独尊儒术”，这表明他虽然是法家代表，但也承认儒家的重要性。李斯在秦始皇统一六国后，推行严格的法律制度，包括《秦律》和《九章律》，这些法律制度对后世产生了深远的影响。 墨家的代表人物是墨子（公元前470-公元前391年），墨子是道家学派的重要人物…	在“百家争鸣”时期，法家的代表人物是商鞅，他提倡法治和强权统治，主张通过严格的法律制度来加强国家的统治和实现政治改革。而墨家的代表人物是墨子，他提倡兼爱和非攻的思想，主张以和平、爱心和互助来解决社会问题。 这一时期的“百家争鸣”运动对当时社会产生了深远的影响。法家的主张强调法治和集权，加强了国家的统一和稳定，推动了政治制度的改革和发展。墨家的主张则强调了和平与互助的重要性，倡导了一种人文主义的思想，对当时社会的道德风气和社会关系产生了积极的影响。 总的来说，“百家争鸣”时期的法家、墨家代表人物及其主张为当时中国社会带来了不同的思想观念和道德理念，促进了社会的进步和发展。 。	a	a	a	a	a	a	why
材料二:在唐宋两代,中国的工程师掀起了发明的热潮,中国引领着全世界的科学技术。—杰里·本特利《新全球史》	结合所学，列举宋朝时期为人类文明的进步做出重要贡献的科技成就。	北宋毕昇发明了活字印刷术，火药被大量制造并用于军事，指南针广泛应用于航海。	宋朝时期有许多重要的科技成就为人类文明的进步做出了贡献。比如毕昇发明了活字印刷术，使得书籍的印刷变得更加高效和便捷。另外，张衡所著的《九章算术》也为数学领域的发展提供了重要的参考和基础。这些科技成就的出现，极大地推动了宋朝时期文化和科技的繁荣，也为后世的发展奠定了坚实的基础。	③北宋沈括编著了《梦溪笔谈》，系统总结了古代科技成就。④北宋郭守敬改进了浑天仪，提高了天文观测的精确度。⑤北宋苏颂设计了水运工程，改善了水利灌溉系统。⑥北宋沈括设计了气象仪器，促进了气象科学的发展。⑦北宋王祯编写了《西铁营造法式》，对冶炼技术有重要贡献。⑧北宋张衡发明了地动仪，提高了地震预警能力。⑨北宋司马光编纂了《资治通鉴》，对历史研究提供了重要参考资料。⑩北宋程颢等人主持修订了《字汇》，对汉字研究有深远影响。	a	a	宋朝时期是中国历史上著名的科技繁荣时期，许多科技成就对人类文明的进步做出了重要贡献。以下是一些关键的科技成就： 1. 水利工程：宋朝的水利工程技术非常发达，尤其是在水利灌溉方面。例如，宋朝的水利专家设计了许多大型的灌溉系统，如南宋时期的“永济河路”，这不仅提高了农业生产效率，也促进了城市的发展。 2. 印刷技术：宋朝的发明家发明了活字印刷技术，这是人类历史上最重要的发明之一。这种技术使得书籍的生产速度大大提高，促进了知识的传播和教育的普及。 3. 丝绸织造：宋朝的丝绸织造技术非常先进，生产的丝绸以其精细的工艺和高质量的品质闻名于世。宋朝的丝绸不仅在国内享有盛誉，也被出口到世界各地，促进了中国与外国的文化交流。 4. 航海技术：宋朝的航海技术也取得了显著的进步。宋朝的船舶设计更加先进，航海技术也得到了发展。例如，宋朝的船只能够在海上航行数千里，甚至到达了非洲的东岸。 5. 造纸术：宋朝的造…	宋朝时期在科技领域取得了许多重要的成就，为人类文明的进步做出了重要贡献。其中最为著名的就是火药的发明和应用。火药的发明不仅在军事上起到了重要作用，还在民用方面有广泛的应用，比如制作烟花和烟火。此外，宋代还发明了活字印刷术，极大地促进了书籍的传播和印刷业的发展。同时，宋代还出现了许多重要的发明，比如指南针、造纸术、水力纺纱机等，这些科技成就都对人类文明的进步产生了深远的影响。	b	b	b	b	a	a	what
材料三:中国古代的科学技术灿烂辉煌,曾经长期领先于世界。统一多民族国家的巩固和发展、农耕经济的繁荣,不仅为中国古代的发明创造提供了根本保障,而且为科技成果的使用与传播创造了条件。勤劳智慧的中国古代科学家,在天文学、气象学、医药学、农学、数学等领域作出了独特的贡献。—摘编自《普通高中课程标准实验教科书·历史③》	根据材料三并结合所学，分析我国古代科技灿烂辉煌的原因。	统一多民族国家的巩固与发展，农耕经济的繁荣，科学家的勤劳智慧，中外交流频繁。	我国古代科技灿烂辉煌的原因主要有三点。首先，统一的多民族国家的巩固和发展为科技的繁荣创造了良好的条件。其次，农耕经济的繁荣为科技的发展提供了经济基础。第三，便利的交通使得科技成果得以迅速传播和交流。此外，勤劳智慧的中国古代科学家在各个领域作出了独特的贡献，推动了科技的进步和发展。这些因素共同促成了我国古代科技的辉煌成就。	①多民族国家的统一为古代科技的繁荣提供了根本保障，同时农耕经济的发展也为科技进步创造了条件。②古代人类智慧的非凡表现，得益于社会各方面的全面发展。	a	a	根据材料三和结合所学，我国古代科技灿烂辉煌的原因主要有以下几点： 1. 统一多民族国家的巩固和发展：中国古代的统一为科技的发展提供了稳定的政治环境和广阔的空间。长期的统一使得国家能够集中资源，进行大规模的建设和研究，促进了科技的进步和传播。 2. 农耕经济的繁荣：农业是中国古代经济的主要支柱，农业的繁荣为科技的发展提供了物质基础。随着农业技术的进步，如水利工程的建设、农具的改进、种植技术的发展等，农业生产效率提高，经济实力增强，为科技研究和创新提供了资金支持。 3. 勤劳智慧的科学家：中国古代有许多杰出的科学家，他们在天文学、气象学、医药学、农学、数学等领域作出了独特的贡献。这些科学家的勤奋研究和智慧创新是推动科技进步的重要力量。 4. 科技成果的使用与传播：中国古代的科技成果不仅仅停留在理论研究上，还广泛应用于生产生活中，如水利工程、交通运输、建筑技术等。同时，通过书籍、口头传播等方式…	中国古代科技灿烂辉煌的原因可以归结为以下几点：首先，中国古代统一多民族国家的稳定和发展为科技的繁荣提供了坚实基础，这种国家统一的环境为科学家们提供了更多的合作机会和资源支持。其次，中国古代农耕经济的繁荣为科技创新提供了物质基础，农业的发展需要科技支持，而科技的进步又促进了农业的发展，形成了良性循环。再者，勤劳智慧的中国古代科学家在各个领域作出了独特的贡献，他们的努力和创新精神推动了科技的发展。总的来说，中国古代科技灿烂辉煌的原因在于国家的稳定和发展、农耕经济的繁荣以及科学家们的勤奋努力和创新精神。 。	tie	a	a	b	a	a	why
实现权力有效监督把朝廷的决策分成三个部分,分别由中书、门下和尚书三省来承担,按照决策、审议、执行的行政程序前后相继,并循环往复的功态过程。通过合理分散权力来加强民主决策,并对权力运作形成监督和制约。实现权力分配均衡三省六部制改变以往的个人施政，成为集体施政，其行政体制设计注重权力之间的相互或单向制约,从制度上避免政策失误和朝令夕改,通过正确的决策和保持政策的连续性。决策与行政分在三省六部制的政权系统中,决策与行政分离已经完成并成熟,中书省和门下省成为独立于皇权之外的决策、发令系统,而尚书省的决览权转移到中书省和门下省，行政权保留下来，尚书省向职能化方向发展。部门协同机制三省六部制具有部门协司机制，它相集体办公的政事堂会议是协助皇帝统治全国的最商决策机关，一切军国大政都在这里讨论商定，集思广益，最后由皇帝裁决施行。平衡君权：任何政令不经中书、门下而发出者，均属违制，一切皇帝诏令必经中书、门…	对于隋唐时期三省六部制最大限度追求“体制内的民主”,谈谈你的看法。	看法是隋唐时期三省六部制具有历史进步性，但并不是追求“体制内的民主”。隋唐时期三省六部制是中国古代封建社会一套组织严密的中央官制。它把朝廷的决策分成三个部分，分别由中书、门下和尚书三省来承担，按照决策、审议、执行的行政程序前后相继，三省的职权分工明确，又彼此制约，提高了行政效率。三省长官共议国事，执宰相之职，宰相集体办公的政事堂会议是协助皇帝统治全国的最高决策机关，一切军国大政都在这里讨论商定，集思广益，能在一定程度上减少皇帝决策的失误。任何政令未经中书、门下而发出者，均属违制，一切皇帝诏令必经中书、门下两省，这对君权有一定的限制作用。但它并非是追求“体制内的民主”，中书省和门下省还是在皇权之下的决策、发令系统，它通过合理分散相权（把相权一分为三），给品级较低的官员以宰相名号，扩大任用宰相的范围，是为了削弱相权，加强皇权，且一切军国大政最终的决策权还是在皇帝。综上所述，三省六部制的确立使…	促进了政府机构的有效运作。这种体制内的民主虽然不同于现代民主制度，但在当时的历史背景下，是一种相对平衡和稳定的政治管理方式。通过三省六部制，各级官员可以参与决策，监督权力的运行，保障社会秩序和政权的稳定，体现了一定程度的政治参与和民主决策。因此，对于追求体制内民主的探索和实践，我们应当客观地评价其在当时所取得的成就和作用。	对于隋唐时期三省六部制最大限度追求“体制内的民主”，我认为这一制度设计确实在一定程度上加强了民主决策，并对权力运作形成了一定的制约。首先，将朝廷的决策分为三部分由三省分别负责，通过合理的权力分散，有利于加强民主决策，避免权力过于集中。其次，将个人施政变为集体施政，使政权相互制约，有利于防止个人专权。第三，中书省和门下省独立于皇权外，拥有决策权，尚书省的决策权转移到中书省和门下省，这样的调整确实有利于保持政策的相对独立性。最后，要颁布一切皇帝政令必须经过中书、门下两省才能颁布，这限制了君权，保障了决策的合理性和公正性。综上所述，三省六部制在当时的历史背景下，确实是在最大限度追求“体制内的民主”，但也不能忽视其局限性和实际操作中可能存在的问题。	b	b	隋唐时期的三省六部制在追求体制内的民主方面做出了显著的尝试。这种制度设计的核心在于权力分散和制衡，通过将决策、审议和执行的职能分别赋予中书、门下和尚书三省，形成了一个相互制约的行政体系。这种设计有助于提高决策的质量和行政的效率，同时也为个人施政提供了一个集体决策的框架。 首先，三省六部制通过分工明确和职责明确，确保了决策过程的透明和参与性。中书省负责起草和提议，门下省负责审议和讨论，而尚书省则负责执行和管理。这种分工不仅促进了决策的多元化和全面性，也为不同层级的官员提供了参与决策的机会。 其次，三省六部制通过集体办公的政事堂会议机制，实现了部门协同和集体决策。政事堂会议不仅是决策的场所，也是集思广益的平台，皇帝在此基础上做出最终裁决。这种机制有助于集体智慧的发挥，提高决策的质量。 最后，三省六部制对君权进行了一定程度的限制。任何政令都需要经过中书和门下两省的审议和批准，这意味着皇帝的权力…	隋唐时期的三省六部制在一定程度上体现了体制内的民主。通过将权力分散到中书、门下和尚书三省，实现了权力的监督和制约。各个部门之间相互协作，通过集体施政和政事堂会议等机制，共同商讨决策，确保政策的连续性和稳定性。此外，规定了任何政令必须经过中书、门下两省批准，对君权进行一定的限制，确保了君权不会滥用。因此，隋唐时期的三省六部制在当时的背景下是一种较为有效的体制设计，最大限度地追求了“体制内的民主”。	a	b	b	a	b	b	others
下表是某学者总结的改革成败模式。改革类型特征示例高效执行模式能够高要求的执行多项措施，重点在于凝聚主体力量并规范执行过程文景之治时内外威胁不大，皇帝主导整个变革，广纳人才并稳定同盟，最终富国安民。成功模式：集中执行模式，主导者选定某些领域集中执行某几项措施。明成祖夺权后急于稳固根基，集中力量疏通大运河、编撰大典及控制诸侯，最终开拓了边疆又稳定了国家。弱执行模式，失败模式主导者难以贯彻高执行要求,无论是少措施的小变革,或是多措施的大变革，都未能实现原目标清末“新政”涉及教育、实业等多方面内容，但由于缺乏强有力的领导核心、执行官员素质低下等原因，最终失败强创新模式变革多项措施又加大创新力度由于存在派系斗争,王安石遭到重重阻挠,虽然同盟力量不足，但他还是决定大刀阔斧，开创青苗法、免役法等多项制度	根据以上材料,就材料的部分或者整体提取观点,并结合所学知识加以阐述。(要求:观点明确，持论有据,论证充分，表达清晰。)	观点是成功和失败的改革模式背后蕴藏着一定的规律。在中国历史发展长河中，改革和变法是永恒的时代主题。虽然历朝历代的改革有不同的内容和特色，但成败的背后仍有一些规律和经验值得我们借鉴。首先，改革打破的不仅仅是形式上的藩篱，更重要的是切断既得利益者的利益链条。纵观历史上的改革，无论成败，几乎都涉及利益的调整。其次，成功的改革无一不是刚柔并济、谋定后动、循序渐进且有强大的执行力和凝聚力。集中主体可以凝聚力量，比如明成祖称帝后集中力量完善南北交通和控制诸侯，进一步巩固了统治。反之，失败的改革，往往有过于集中推出大量改革措施而急于求成的问题，如戊戌变法短短百日就涉及了政治、经济、军事、文化教育等方面，操之过急且不分重点，而其中改革科举一项甚至阻断了当年与康梁一起“公车上书”的同盟者的晋升之路，从而使得顽固派迅速反扑；失败的改革还可能与人才不足、执行不力、孤立无援有关，如王安石变法树立了巨大的对立面，…	观点：变革要有高效执行模式与集中执行模式相互配合。 在中国历史上，成功的变革往往是由强大的支撑力和高效执行模式共同推动的。成功的变革者通常能够抓住当时的重点问题，循序渐进地解决主要问题，然后再处理次要问题。他们不仅有明确的目标和执行计划，还能够迅速有效地将措施付诸实施。这种高效执行模式能够确保变革措施的顺利推行，使变革过程更加高效和有序。 相反，失败的变革往往缺乏强大的支撑力和集中的执行模式。缺乏支撑力会导致变革过程中面临多方阻力，难以顺利推行变革措施。此外，没有明确的执行计划和集中的执行模式，会使变革者忙于应付各种问题，无法专注于解决主要问题，最终导致变革失败。 因此，变革不是一个人的事，需要有大家的支持和合作。在变革过程中，必须分清轻重，选择主要问题下手，专注致力于解决一个问题。只有这样，才能确保变革的成功并提高成功的机率。	根据以上材料，可以得出结论：缺乏强有力的领导核心必然导致新政失败。首先，清末新政由梁启超等人与光绪帝发起，虽然涉及面广、全面，但由于领导者力量薄弱，缺乏群众支持，导致新政无法实施。其次，新政触犯了旧封建势力的利益，成员素质低下，受到顽固派阻挠，缺乏强有力的领导核心和科学的指导，致使变革失败。从中我们可以看出，改革需要有强有力的主导者，否则即使改革是必要的，仍会以失败告终。在历史长河中，这一点也得到了充分的印证。	a	a	根据提供的材料，我们可以提取以下几个观点： 1. 高效执行模式的关键在于高要求的执行和凝聚主体力量。例如，文景之治时，皇帝主导整个变革过程，广纳人才并稳定同盟，最终实现了富国安民的目标。这表明当改革面临的内外威胁不大时，通过集中力量和高效执行可以取得成功。 2. 集中执行模式在成功的情况下可以带来显著成效。明成祖夺权后，通过集中力量疏通大运河、编撰大典及控制诸侯，成功地开拓了边疆并稳定了国家。这说明在特定条件下，主导者可以通过集中执行某些领域的措施来实现改革目标。 3. 弱执行模式往往导致失败。清末“新政”虽然涉及教育、实业等多方面内容，但由于缺乏强有力的领导核心和执行官员素质低下，最终未能实现原目标。这表明改革的成功不仅取决于改革内容的多样性，还需要强有力的执行力和领导能力。 4. 强创新模式虽然具有变革多项措施的特点，但也可能因为内部矛盾而失败。王安石的新政虽然开创了青苗法、免役法等…	根据以上材料，可以看出改革的成功与失败往往取决于改革的执行模式。高效执行模式和强创新模式都能够在改革中取得成功，因为它们都注重集中力量执行多项措施，凝聚主体力量，规范执行过程。例如，明成祖夺权后采取集中执行模式，稳固了根基，开拓了边疆；王安石虽然遭到阻挠，但仍然采取强创新模式，实施了青苗法、免役法等制度。相反，弱执行模式往往会导致失败，因为领导者难以贯彻高执行要求，无法实现原目标。清末的“新政”就是一个失败的例子，由于缺乏强有力的领导核心和执行官员素质低下，最终以失败告终。 因此，可以得出结论：在进行改革时，选择合适的执行模式至关重要。只有通过高效执行和强创新，才能够在改革中取得成功，最终实现富国安民的目标。 。	b	b	b	a	a	a	others
朱元璋正式建立明朝后,置御史台,于洪武十五年更置都察院,并初设监察御史,分为十二道,后又几经调整,洪武十七年,更定都察院官制,设左、右都御史,左、右副都御史,左、右佥都御史,下辖有直属机构和内外监察御史。与此同时,洪武二十年,正式定分设于六部的六科给事中监察六部。在朱元璋的主持下,先后制定了《出巡相见仪礼》《奏请点差》和《巡历事例》。明初规定“凡内外管属衙门官吏,有系父子、兄弟、叔侄者,皆须从卑回避”,吏部选任官员“南北更调,定为常例”。《明大诰》有载:“若民从朕命,着实为之,不一年之间,贪官污吏尽化为贤矣。为何？以其良民自辨是非，奸邪难以横作，由是逼成有司以为美官。其正官、首领官及一切人等，敢有阻挡者，其家族诛。”摘编自曾丽玮《明代监察制度的特色及其现代启示	根据材料一并结合所学知识，概括明初朱元璋为加强监察制度建设而采取的主要措施。	主要措施是实行官员回避制度，设立两套独立的监察体系，制定严苛的法律法规、严惩贪腐官员，准许民间力量参与反腐。	明初朱元璋为加强监察制度建设采取的主要措施包括：设立都察院和监察御史，建立了都察院官制，设立了都御史和内外监察御史，成立监察六部并制定了额员制度。	明初朱元璋为加强监察制度建设采取了以下主要措施：制定条例约束，设立监察御史，严惩贪官。	tie	a	朱元璋在明朝初期为了加强监察制度，采取了一系列措施来确保官员的廉洁和政府的效率。首先，他正式建立了御史台，并在洪武十五年更名为都察院，设立了监察御史，分为十二道。随后，洪武十七年，他对都察院的官制进行了调整，设立了左、右都御史、左、右副都御史和左、右佥都御史，并下辖直属机构和内外监察御史。朱元璋还在洪武二十年中，正式设立了六科给事中，负责监察六部的官员。 此外，朱元璋还制定了一系列监察相关的法规和规定，包括《出巡相见仪礼》、《奏请点差》和《巡历事例》。这些规定强调了官员的廉洁自律，要求官员在处理公务时必须遵守一定的礼仪和程序。此外，明初还规定官吏之间不得有亲属关系，以防止家族利益的干扰，并实行南北更调制度，以防止官员滥用职权。 《明大诰》中还记载了朱元璋对于贪官污吏的严厉打击措施，要求民众积极举报贪官，并承诺如果民众按照规定举报，官员不久就会被清除。朱元璋还明确规定，对于阻挡监察的官员及…	朱元璋为加强监察制度建设采取了多项主要措施。首先，他置御史台，并设立了都察院，设立监察御史，分为十二道，后又几经调整，设立左、右都御史、左、右副都御史、左、右佥都御史，并下辖有直属机构和内外监察御史。同时，他在六部设立六科给事中监察，加强了对地方各级官员的监督。此外，朱元璋规定了官员之间的亲属关系不能在同一衙门任职，以避免腐败。他还制定了一系列制度，如《出巡相见仪礼》《奏请点差》和《巡历事例》，以规范官员的行为。总的来说，朱元璋通过建立监察机构、加强监督制度、规范官员行为等多方面措施，加强了明初的监察制度建设。	a	b	b	a	a	a	what
1978 年经美国国会批准、由卡特总统签署的《监察长法》明文规定，监察长及其办公室是负责审计和刑事调查的独立部门。法律规定各部委的监察长都由总统直接任命，并须经参议院同意,只有总统有权撤换监察长。《政府道德法》对财产申报的种类、人员、内容、审查以及利益冲突的解决等作了详细的规定,还要求设立联邦政府道德署,政府各部门也要设立道德官员办公室，并对这些专门机构的职能、权限和运作程序作出规定，从而使执法主体、执法内容和监督对象在同一部法律之中予以明确。美国《道德改革法》规定:总统、副总统、国会议员、联邦法官，以及行政、立法和司法三大机构的工作人员，必须在任职前报告并公开自己以及配偶的财务情况,包括收入、个人财产等,以后还须按月申报。美国《联邦刑法典》规定，任何政府官员如果收受的财物价值超过 7 000 美元，就要处以相当于其收受财物价值 3倍的罚金，或者判 15年以下的监禁，或者取消其政府官员的…	根据材料二并结合所学知识,归纳美国国家行政监察的特点。综合上述材料,说明明初中国和现代美国行政监督对我国的启示。(8分)	特点包括有较完善的法律保障，监察机构独立性强，对监察对象行为规范较为具体，惩罚措施坚强有力。启示是构建有中国特色的与监察法律相结合的反腐倡廉法规体系，加快公务员从政道德及财产申报的立法进程，推进政务公开及政治生活的透明度。	美国国家行政监察的特点包括监察官员及其办公室为独立部门，对专门构机的职能、权限和运作程序作出设定，设立联邦政府道德署以及要求三大机构人员及其配偶必须公开财务情况。这些特点启示我们在进行行政监督时，需要建立独立的监察部门，明确部门执行的制度，得到政府的大力支持，建立严格的监察过程和惩罚制度，同时最高权力机关人员要起到带头作用。通过借鉴美国国家行政监督的经验，我们可以更好地加强我国的行政监督工作，提高政府的透明度和廉洁度，维护公共利益和社会稳定。	根据材料二和所学知识，美国国家行政监察的特点包括监察长由总统任命且议院同意，监察长办公室是独立部门。这表明美国的行政监督体系具有权力分立和独立监督的特点，能够有效监督政府机构和官员的行为。 明初中国和现代美国的行政监督对我国的启示是，任何政府官员不可收贵重物品，要减少贪官现象。同时，严格要求机构工作人员，实行公开执政，能够有效提高政府的透明度和廉洁度，保障人民的利益。因此，我国可以借鉴美国的行政监督制度，加强监督机制，提高政府效率，减少腐败现象，为国家的发展和人民的福祉作出更大的贡献。	a	a	根据材料二和结合所学知识，美国国家行政监察的特点主要包括： 1. 独立性：监察长及其办公室是独立部门，负责审计和刑事调查，直接由总统任命，并须经参议院同意，总统有权撤换监察长。 2. 法律明确：《监察长法》和《政府道德法》等法律明确规定了监察机构的职能、权限和运作程序，以及财产申报的种类、人员、内容、审查以及利益冲突的解决等。 3. 公开性：政府官员的财务情况必须在任职前报告并公开，包括收入、个人财产等，并须按月申报。 4. 严格的法律责任：《联邦刑法典》规定了严格的法律责任，对于收受贿赂的政府官员，若收受的财物价值超过7,000美元，就要处以相当于其收受财物价值3倍的罚金，或者判15年以下的监禁，或者取消其政府官员的资格。 至于明初中国和现代美国行政监督对我国的启示，可以从以下几个方面进行： 1. 建立独立的监察机构：明初中国的监察制度虽然存在，但由于缺乏独立性，容易受到皇权的干预。现…	美国国家行政监察的特点包括：监察长及其办公室是独立部门，由总统直接任命并经参议院同意；设立了联邦政府道德署和各部门道德官员办公室，规定财产申报及利益冲突的解决方式；制定了道德改革法和联邦刑法典，对政府官员的行为进行规范和处罚。 中国和现代美国行政监督对我国的启示在于强调独立监督机构的设立和运作，以确保监督的客观性和公正性；规定政府官员必须公开财产情况，防止腐败行为的发生；设立了对官员行为的明确规范和处罚措施，增强了执法主体、执法内容和监督对象的一致性。 总的来说，中国和现代美国的行政监督经验都强调了制度的健全和规范，以确保政府官员的廉洁和公正。这对我国启示在于建立更加健全的行政监督机制，规范政府官员的行为，防止腐败现象的发生，从而提高政府的透明度和廉洁度。	b	a	b	b	a	a	others
材料—法律制度是随着国家的建立而相应产生的。最初在我国奴隶制时期，还处于“礼法不分”的阶段，法律也只能以不成文的形式表现出来。进入封建社会特别是唐朝时期,我国封建政治、经济得到前所未有的发展,封建法制也取得了辉煌的成就,以《唐律疏议》为代表的唐代法律,标志着中国封建法制臻于成熟和完备。封建法律的思想贯彻了“德主刑辅”“明刑弼教”的精神,执行外儒而内法的封建法律政策。从战国李悝的《法经》,至清代的《大清律》,历代成文法典基本上都是刑法典,兼有民法、行政法、经济法、诉讼法等方面的内容。皇帝发布的“敕”“令”“诏”“谕”,凌驾于法律之上,具有最高的法律效力。同时,皇帝握有最高的司法权，一切重案、要案、疑案皆须皇帝裁决、批准，封建皇帝可以法外用刑，也可法外施恩，赦免任何罪犯。-摘编自万安中《中国古代法律制度嬗变及特征刍议》	根据材料一并结合所学知识，指出中国古代法律制度的主要特征。	主要特征是法律制度随着政治、经济的发展经历了一个不断完善的过程，以儒家学说为指导思想和理论基础，内容以刑法为主体，法律执行以君主意志为转移，司法与行政不分。	中国古代法律制度的主要特征包括两点：首先是法律制度随着国家不同而不同，即不同朝代、不同王朝的法律体系有所差异；其次是皇帝握有最高司法权，即皇帝是最高的法律权力机构，负责制定法律、裁决案件，具有最终的司法决定权。	中国古代法律制度的主要特征包括皇权在法律之上，深受封建法律的思想贯彻，以及等级制度明确。	a	a	中国古代法律制度的主要特征可以从材料中得到体现。首先，中国古代法律制度是随着国家的建立和社会的发展而相应产生的，尤其是在封建社会时期，法律制度取得了辉煌的成就，如《唐律疏议》等法典的产生。其次，封建法律制度贯彻了“德主刑辅”和“明刑弼教”的精神，强调法律的教育和道德功能。再次，中国古代法律主要以刑法为主，兼顾民法、行政法、经济法和诉讼法等内容，形成了刑法典的特点。同时，皇帝在法律体系中占据了至高无上的地位，其发布的“敕”、“令”、“诏”、“谕”具有最高的法律效力，皇帝还握有最高的司法权，可以法外用刑或施恩，赦免罪犯。这些特征体现了中国古代法律制度的封建性和中央集权性。	中国古代法律制度的主要特征包括： 1. 封建法律思想贯彻了“德主刑辅”“明刑弼教”的精神，强调道德与刑罚相辅相成，注重教化与惩罚结合。 2. 封建法律政策执行外儒而内法，即在法律制度中融入了儒家思想，强调治理国家的道德规范和法治。 3. 历代成文法典基本上都是刑法典，内容涵盖了刑法、民法、行政法、经济法、诉讼法等方面。 4. 皇帝发布的“敕”“令”“诏”“谕”具有最高的法律效力，皇帝拥有最高的司法权，可以法外用刑，也可法外施恩，赦免任何罪犯。 5. 法律制度在封建社会中起到维护统治者权威、维护社会秩序、维持封建等级制度等作用。	a	b	a	a	a	a	what
材料二近代以来，西方各国在继承传统法律思想的基础上，融合启蒙思想制定了各自的法律制度。在国家权力结构层面上，国家权力分为立法权、行政权和司法权，法律由代表人民行使权力的议会制定，行政机构在法律规定的框架内行使行政权，法院根据法律独立掌握司法权。在法律内容上,都不同程度地体现了天赋人权和人人平等思想,注意保护个人的各种权利,包括生命权、自由权等,为维护资产阶级利益,特别强调对私有财产的保护。在司法实践中，独立、专业的律师为被审判者提供辩护，可以减少法官对法律的误读；从普通民众中产生陪审团,参与案件审理和判决,使民众能够直接参与法律事务。	根据材料二并结合所学知识，归纳近代西方法律制度具有鲜明特色的具体表现。	具体表现是继承传统法律思想的同时融合了启蒙思想，立法、行政、司法三权分立并相互制衡，注意保护个人权利和私有财产，坚持程序公正，实行律师辩护制度。	① 近代西方法律制度具有鲜明特色，首先体现在国家权力结构层面上，即三权分立，行政机构必须在法律规定的框架内行使权力。其次，在法律内容上，西方法律制度体现了天赋人权和人人平等的思想。最后，在司法实践中，法律制度为被审判者提供了专业的辩护，同时民众也能够直接参与法律事务，这些都是近代西方法律制度的鲜明特色之一。	近代西方法律制度具有鲜明特色的具体表现包括：为维护资产阶级利益，特别强调对私有产的保护；在司法中实行独立、专业的律师为被审判者提供辩护；普通民众中产生的陪审团可以直接参与法律事务。	a	a	近代西方法律制度具有以下鲜明特色的具体表现： 1. 法律制定与分权：在现代西方国家，法律通常由民主选举产生的议会制定，代表人民的意志和利益。这种制度确保了法律的民主性和合法性。例如，美国的《权利法案》和英国的《大宪章》都是通过议会制定的重要法律文件，它们体现了立法权的分立和制衡。 2. 法律实施与行政权的制约：行政机构在法律的框架内行使权力，不能随意超越法律规定。这一原则确保了行政权力的制约和法律的统一性。例如，德国的《基本法》明确规定了行政机关的职权和限制，确保了行政权力的合法性和透明度。 3. 独立的司法权：法院独立掌握司法权，能够根据法律独立判断案件，保护被告的权利。例如，法国的《1791年宪法》首次明确规定了司法独立的原则，确保了法官的独立性和专业性。 4. 法律内容的普遍性与人权保护：近代西方法律制度强调保护个人的基本权利，包括生命权、自由权等。这些权利被写入宪法和基本法律中，…	根据材料二，近代西方法律制度具有以下鲜明特色： 1. 分权制衡：西方法律制度将国家权力分为立法权、行政权和司法权，通过权力分立和相互制约，实现了权力的平衡与监督，避免了权力过度集中和滥用。 2. 人权保护：法律内容体现了天赋人权和人人平等思想，着重保护个人的各种权利，包括生命权、自由权等，维护了个人的尊严和自由。 3. 私有财产保护：法律特别强调对私有财产的保护，为资产阶级利益的维护提供了法律保障，促进了私有财产的合法积累和保护。 4. 法治原则：依法治国是近代西方法律制度的核心理念，法院独立运作，律师提供专业辩护，陪审团参与案件审理，保障了司法公正和法律的严肃性。 5. 民主参与：通过陪审团等形式，近代西方法律制度使普通民众能够直接参与法律事务，增强了法律的公正性和民主性。	tie	b	b	a	b	b	what
2020年5月28日,十三届全国人大三次会议表决通过了《中华人民共和国民法典》,成为新中国立法史上一个标志性事件。这是我国首部以“法典”命名的“社会生活百科全书”，是汲取中华优秀法律文化精粹,借鉴人类法治文明成果,整合新中国成立以来海量民法规范,融合当代核心价值观于一体的保民权之“圣经”,图国治之大典,其地位之重要,内容之繁杂，体例之科学，结构之严谨，鲜有立法能与之比肩，在博采众长的基础上突出了“中国特色，实践特色，时代特色”。	根据材料三并结合所学知识，说明新时期我国编撰民法典的重大意义。	意义在于有利于推进依法治国，提高国家治理能力，进一步保障了公民的人身和财产权利，有利于社会的和谐稳定，为改革开放和社会主义市场经济体制的进一步深化提供了法律依据，促进和保障中国特色社会主义不断发展，为后世和其他国家民法的建设提供了借鉴。	新时期我国编撰民法典具有重大意义。首先，它突出了“中国特色，实践特色，时代特色”，体现了我国特定国情和实践经验的法律规范。其次，民法典的制定保障了人民的利益，为社会提供了更加完善的法律保障体系，维护了人民的合法权益。最后，民法典对后世产生深远影响，为我国法治进程注入了新的动力，促进了国家法治建设的不断深化和完善。	新时期我国编撰民法典的重大意义在于，首先，规范了人民的行为准则，为社会提供了统一的法律规范。其次，民法典汲取了中华优秀法律文化精华，融合了当代的核心价值观，有利于提高人民的基本素养。最重要的是，民法典的出台有助于维护社会的稳定，促进法治建设，确保国家和社会的正常运转。	a	a	新时期我国编撰民法典的重大意义在于以下几个方面： 1. 法治中国的重要组成部分：民法典的制定是新中国法治建设的重要成就，标志着我国法治国家建设迈出了新的步伐。它为保护公民的合法权益，维护社会秩序，促进社会和谐稳定提供了坚实的法律基础。 2. 法典化的深化：民法典的编纂是对我国民法体系进行法典化的深化，通过系统化、规范化的法律体系，提高了法律的权威性和普及性，方便公众理解和应用。 3. 保护民权的“圣经”：民法典是对民权的全面的保护，系统地规定了民事权利和义务，包括婚姻家庭、继承、合同、物权等方面的法律规范，为公民的个人生活和社会活动提供了法律保障。 4. 体现中国特色社会主义法治：民法典在编纂过程中，充分体现了中国特色社会主义法治的要求，融入了中国的法律文化和实践经验，形成了具有中国特色的民法体系。 5. 国际影响力提升：民法典的制定和实施，不仅是对我国民法体系的重大变革，也是对国际法治…	新时期我国编撰民法典的重大意义在于，民法典作为我国首部以“法典”命名的“社会生活百科全书”，对于规范社会生活、维护公民权益、促进社会发展起到了至关重要的作用。首先，民法典的制定彰显了我国法治建设的重要成就，体现了我国对法治建设的高度重视。其次，通过编撰民法典，我国借鉴了中华优秀法律文化精粹和人类法治文明成果，使我国的法律体系更加完善和现代化。此外，民法典的出台也有利于提升国家治理水平，加强社会管理和服务，推动经济社会发展。总的来说，新时期我国编撰民法典的重大意义在于为我国法治建设注入了新的活力，为构建社会主义法治国家奠定了坚实的基础。 .	a	b	b	b	a	a	what
材料一 自（唐）太宗平突厥，破延陀，而回纥兴焉。太宗幸灵武以降之，置州府以安之，以名爵玉帛以恩之。其义何哉？盖以狄不可尽，而以威急羁縻之。开元中……四夷八蛮，翕然向化，要荒之外，畏威怀惠，不其盛矣！——刘昀等《旧唐书》	根据材料一并结合所学知识,概括唐朝的民族政策及处理民族关系的方式。	方式包括战争置州府和羁縻吸纳融合。政策是开明民族政策。	唐朝的民族政策包括因地治宜、分化而治和恩威并施。具体方式是通过武力占领他们的地盘，设立府州政府机构进行管理，并给予他们首领相关职位和金银。这样的政策措施有助于维护民族关系的稳定和和谐。	唐朝的民族政策是和平相处，采取羁縻政策。处理民族关系的方式包括发动武力战争平定少数民族战乱、建立州府加以管理、封爵位收玉帛以及实行羁縻政策和亲。	b	b	唐朝的民族政策主要体现在对边疆民族的安抚、融合和利用上。根据材料一所述，唐太宗平定突厥和破延陀后，回纥民族便兴起。唐太宗采取了恭迎的态度，亲自前往灵武接待回纥使者，并在其居住地设立州府，以安抚其民众。同时，通过赠送名爵和玉帛等物品来表达恩情。这种政策的目的在于利用边疆民族的力量，通过威慑和恩惠来实现羁縻治理，即通过设立州郡等行政机构来控制和管理边疆地区，同时通过经济和政治手段来稳定边疆。 结合所学知识，我们可以进一步理解唐朝的民族政策。唐朝的民族政策大体上可以分为以下几个方面： 1. 安抚政策：唐朝在平定边疆民族后，采取了安抚政策，通过设立州郡、赐予名爵、赠送玉帛等方式来安抚边疆民族，减少边疆地区的动荡。 2. 融合政策：唐朝鼓励边疆民族的文化和语言的融合，通过婚姻联姻、文化交流等方式促进民族之间的融合。 3. 利用政策：唐朝在边疆民族中选拔有能力的人才，任命为官员，利用他们的力量来加强…	回答：唐朝的民族政策可以概括为以武力和仁政相结合的方式处理民族关系。通过武力平息叛乱，对抗外敌，同时也通过赐予封爵、赏赐、设立州府等方式来安抚和拉拢各民族。在处理民族关系上，唐朝采取了灵活的策略，既有强硬的手段，又有灵活的外交手段，致力于维护统一和稳定。同时，唐朝也以文化、经济等手段向其他民族传播中原文化，促进各民族的融合和向化。这种综合性的民族政策使得唐朝在开元盛世时期实现了四夷八蛮翕然向化的局面。	b	b	b	b	b	b	what
材料二 益以言民族，有史以来，其始以一民族成一国家，其继乃与他民族揉合将聚以成一大民族。民族之种类愈多，国家之版图亦随以愈广……至今清廷虽覆，而我竟陷于列强殖民地之地位矣。故吾党所持之民族主义,消极的为除去民族间之不平等,积极的为团结国内各民族,完成一大中华民族。欧战以还，民族自决之义，日愈昌明，吾人当仍本此精神，内以促全国民族之进化，外以谋世界民族之平等。——1923年1月1日孙中山《中国国民党宣言》	根据材料二并结合所学知识,概括孙中山民族政策形成的历史背景。	背景是民族危机不断加剧，帝国主义势力渗透，民国成立，民族的国家观念和民族整体意识不断深化以及三民主义的指导。	背景下，孙中山等民主党派人积极构建资本主义社会的历史背景是：列强侵略中国，中国沦为半殖民地半封建社会；清政府昏庸无能，软弱腐朽；封建大地主阶级无限掠夺百姓财产，阶级矛盾严重。在这种情况下，中国人民之间存在不平等、矛盾频发，孙中山等人努力寻找新的出路，以建立一个民族政策，实现国家独立和民族团结。	历史背景：①清王朝覆灭，中国各代民族分裂，难以统一②中国的社会性质还有殖民社会，民族迫切要求统一，对外来强进行将，③唯有民族得到统一，才能构成国家	a	b	孙中山的民族政策形成的历史背景可以追溯到中国历史上民族融合与国家形成的过程。孙中山在《中国国民党宣言》中提到，中国的民族形成过程是通过多个民族的融合而成的，这种融合不仅在历史上发生过，而且在当时的社会政治环境中仍然是一个重要的现象。随着民族的多样性增加，国家的版图也随之扩大。 在孙中山提出民族政策的时代，中国正处于清朝末年，面临着严重的民族不平等问题。清朝是满族建立的王朝，统治了汉族和其他少数民族，导致民族间的矛盾和不平等。同时，中国也被列强殖民压迫，丧失了主权和独立，陷入了半殖民地半封建的状态。 孙中山的民族主义政策旨在消除民族间的不平等，积极团结国内各民族，完成大中华民族的形成。这种政策是基于民族自决的原则，这一原则在欧战后期和战后逐渐被国际社会所接受。孙中山的民族政策不仅是对中国自身民族问题的解决，也是对国际上民族平等和自决权的响应。	根据材料二并结合所学知识，孙中山民族政策形成的历史背景包括中国清朝的衰落和列强的侵略，导致中国沦为列强殖民地。孙中山认为解决中国问题的关键在于团结各民族，消除民族间的不平等，建立一个大中华民族。他的民族政策受到欧战后民族自决思想的影响，强调促进全国民族的进化，争取世界民族的平等。这样的背景下，孙中山提出了一系列的政策和主张，致力于实现国家的统一和民族的团结。 。	tie	a	a	b	a	b	what
材料一 “工业革命”的概念出现于18世纪末。当时人们对英国社会经济领城中所发生的变革产生了深刻印象,因而以“革命”一词加以表述。汤因比在论述工业革命的后果时讲道: “首先令人感到印象深刻的是人口更快地增长……其次我们注意到，农业人口相对地或绝对地减少。在工业中，最重要的现象则是,由于机器的发明,工厂制代替了家庭手工业制度。”可见,最初研究工业革命的学者，从一开始就注意到了工业革命期间英国社会和经济的重大变化，并且认为，“这些变化……是突然的和猛烈的。一些伟大的发明都是在相当短的时间内完成的。”一些伟大的发明都是在相当短的时间内完成的。”总之,这一批人把工业革命看成英国经济发展的飞跃，是明显的转折。一一摘编自王觉非《英国近代史》	根据材料一并结合所学知识，概括英国社会经济领域变革的表现。	表现是人口革命，工农业人口比例改变；生产组织革命，工厂制代替家庭手工业制；生产动力革命，蒸汽动力代替人力和自然力；短期内取得重要突破。特点是起步晚，借鉴外国经验，国家政策支持，重视技术人才。	英国社会经济领域变革的表现主要包括人口增长速度加快，农业人口相对或绝对减少；机器生产大量出现，工厂制代替家庭手工制度；变化发展猛烈、迅速，伟大发明大量出现，如汽车、蒸汽机、纺织机等；人们的时间观念增强，城市基础设施建设开始完善、发展。	英国社会经济领域变革的表现包括人口增长速度快，农业人口减少而工业人口增加，工厂制取代家庭手工业制度，在短时间内完成伟大的发明，以及大量机器的使用。	a	a	根据材料一和所学知识，英国社会经济领域在工业革命期间经历了以下几个显著的变革表现： 1. 人口增长加速：工业革命期间，英国的人口增长速度加快，这与新兴的工业生产方式和改善的生活条件有关。人口的增长为工业发展提供了大量的劳动力。 2. 农业人口的相对或绝对减少：随着工业化的进程，越来越多的人从农业转向工业工作。这种转变导致了农业人口的相对或绝对减少，农业生产方式也开始发生变化。 3. 机器的发明和工厂制的兴起：工业革命期间，机器的发明和改进极大地提高了生产效率。随之而来的是工厂制的兴起，取代了传统的家庭手工业制度。工厂制生产方式集中了生产力，提高了生产规模和效率。 4. 突然的和猛烈的变化：工业革命期间，许多伟大的发明在短时间内相继出现，这些发明极大地推动了社会经济的变革。例如，蒸汽机的发明和应用改变了能源的使用方式，铁路的建设改善了交通运输。 5. 经济发展的飞跃和显著转折：工业革命被视…	英国社会经济领域变革的表现包括以下几个方面：首先是人口增长速度加快，导致人口数量的急剧增加；其次是农业人口相对或绝对减少，表明农业劳动力向工业部门转移的趋势；最重要的现象是工厂制代替了家庭手工业制度，机器的发明促使工业化生产模式的兴起。这些变化是突然和猛烈的，一些伟大的发明在短时间内完成，标志着英国经济迅速发展的飞跃和转折。这些变革使得英国经济由传统的农业社会向现代工业社会转型，为工业革命的持续推动奠定了基础。	a	b	b	b	b	b	what
材料三 工业革命是资本主义社会和人类社会发展的必由之路。尽管各国工业革命发生的时间早迟不一,国情不同,他们特点也各有异,但它仍有共同的发展规律。因此,我们认真总结英国工业革命的经验,不仅对于研究其它资本主义国家的工业革命有重大的意义,而且对于我国实现社会主义现代化也有一定的现实意义。	根据上述材料并结合所学知识,分析英、德两国开展工业革命的共同意义.	意义在于促进了资本主义世界市场的形成，推动了人类文明的进步，给其它资本主义国家的工业革命提供借鉴经验，对我国实现社会主义现代化有一定的现实意义。	国家提供了强大的经济基础和技术支持。④工业革命推动了社会结构的变革，促进了城市化进程，加快了国家现代化建设的步伐。因此，英、德两国开展工业革命对于资本主义社会的发展，推动了经济的繁荣和国家实力的增强，具有重要的共同意义。	英、德两国开展工业革命的共同意义在于，工业革命是资本主义社会和人类社会发展的必由之路。同时，工业革命促进了国家经济的快速发展，推动了工业现代化转型。此外，工业革命也促进了人口增长，提升了人民的生活水平，加快了社会发展的步伐。这些共同点为其他国家现代化提供了宝贵的历史经验。	b	b	根据上述材料，我们可以分析英、德两国开展工业革命的共同意义。首先，工业革命是资本主义社会发展的必由之路，这意味着它为两国的经济和社会结构带来了深远的影响。英国和德国虽然工业革命的时间和方式有所不同，但它们都体现了人类社会发展的普遍规律。 英国工业革命是世界上第一个工业化国家，它的经验对于其他国家，包括德国，具有重要的参考价值。英国在蒸汽机、煤炭、铁轨等技术上的突破，为工业化提供了关键的推动力。这些技术的发展不仅促进了生产力的提高，也推动了社会结构的变革，例如，工业化导致了城市化的加速和劳动力从农业向工业的转移。 德国工业革命则是在英国的基础上发展起来的，它吸收了英国的技术和管理经验，同时也在自己的特定国情下进行了创新。德国的工业革命以其高度的组织性和技术创新著称，例如，德国的化学工业和重工业在当时就已经显示出了强大的竞争力。德国的工业化也伴随着社会结构的变化，例如，德国的工人阶级组织和工…	英、德两国开展工业革命的共同意义在于都是在资本主义社会背景下逐步实现工业化和现代化的过程。虽然英国和德国的工业革命在时间上有所不同，但都经历了从传统农业社会向工业社会的转变，实现了生产方式、社会结构和经济发展的深刻变革。两国的工业革命都推动了技术、科学和生产力的发展，提高了生产效率和国家竞争力，促进了国家经济的快速增长和社会的现代化进程。 此外，英、德两国在工业革命中都发挥了重要的先导作用，为其他国家的工业化进程提供了借鉴和参考。英国率先实现工业化，成为世界第一工业强国，其经验被广泛传播和应用于其他国家的工业革命中。德国则在19世纪后期迅速崛起为欧洲重要的工业国，其在科技创新、工程技术和管理经验方面的贡献也为其他国家提供了宝贵的经验和借鉴。 总的来说，英、德两国开展工业革命的共同意义在于推动了资本主义社会和人类社会的发展，为其他国家的工业化进程提供了启示和借鉴，对于研究工业革命的发展规律…	tie	a	a	b	a	b	why
新中国成立后,中央在大江大河治理中把保证人民生命财产安全放在首位。1951 年，开始在永定河上修建官厅水库，这是海河流域第一座大型水库。1957年，《海河流城规划》编制完成，其方针任务是：防止华北洪涝灾害，发展灌溉、航运、发电、工业城市给水。1963 年 11月，毛泽东发出“一定要根治海河”的号召。海河流城各地分别成立“根治海河”指挥部，在工程实施中采取了“集中力量打歼灭战”的方针。“根治海河”前期，每年用在水利建设上的劳动力达百万以上。骨干工程在用工与治理顺序上实现了各省市的固结协作。经不懈治理，海河流域的洪涝等自然灾害得到有效控制，“十年九荒”的历史彻底改变	根据材料并结合所学知识，分析新中国成立后治理海河的特点及其意义。	特点是将保证人民生命财产安全放在首位，群众广泛支持、参与，统一领导、统筹规划，地区间的团结合作，水利工程功能更广泛以及制定了正确的方针政策。其意义在于有效治理了水患，推动了国民经济恢复发展，为现代化建设创造了有利条件，体现了制度优势。	新中国成立后治理海河的特点包括彻底性、有效利用资源、速度快和效率高。这种治理方式从根源上解决了海河的问题，保证了人民的生命和财产安全，并有效控制了海河流域的洪涝等自然灾害。同时，这种治理方式也彻底改变了“十年九荒”的历史，为海河流域的发展奠定了坚实的基础。因此，新中国治理海河的做法对于保障人民生活安全、有效利用资源、控制自然灾害等方面具有重要意义。	治理海河的特点是将保障人民生命财产安全放在首位，通过修建水库、有效治理和综合治理等措施，能够发挥多种功能，任务明确。同时，采取集中力量解决主要矛盾，深入要害，需要大量人力、物力、财力，并耗费巨大。治理海河的意义在于有效控制洪涝等自然灾害，使人民能够放心生活，提高幸福指数。此外，提高农作物产量，改变了“十年九荒”的状况。	b	b	新中国成立后治理海河的特点主要体现在以下几个方面： 1. 安全至上：中央政府将保证人民生命财产安全放在首位，这直接影响到了海河治理的方向和方法。例如，1951年开始修建官厅水库，这不仅是为了防洪，也是为了发展灌溉、航运和发电等经济活动，间接保障了人民的生活和生产。 2. 综合规划：1957年完成的《海河流城规划》体现了对海河流域的全局性治理。该规划不仅关注防洪，还包括了灌溉、航运、发电和工业城市给水等多方面的考虑，展现了新中国治理海河时的综合性和前瞻性。 3. 号召与动员：1963年11月，毛泽东的“一定要根治海河”的号召极大地激发了全国人民的治理热情。海河流城各地成立了“根治海河”指挥部，形成了强大的治理力量。 4. 集中力量打歼灭战：在工程实施中采取了“集中力量打歼灭战”的方针，这体现了新中国治理海河时的决心和力度。通过大量劳动力投入，每年都有百万以上的人力投入到水利建设中。 5. …	根据材料和所学知识，新中国成立后治理海河的特点主要体现在以下几个方面： 1. 重视人民生命财产安全：中央将保证人民生命财产安全放在首位，这体现了新中国成立后政府对人民生活的关注和责任感。 2. 综合规划和协作：从修建官厅水库到制定《海河流城规划》，各地分别成立“根治海河”指挥部，实现了各省市的固结协作，体现了治理海河的综合规划和统一指挥。 3. 集中力量打击：在毛泽东发出“一定要根治海河”的号召下，各地采取了“集中力量打歼灭战”的方针，集中劳动力用于水利建设，有效控制了海河流域的洪涝等自然灾害。 治理海河的意义在于确保了华北地区的洪涝灾害得到有效控制，为当地人民的生产生活提供了稳定的环境。同时，海河的治理也为灌溉、航运、发电、工业城市给水等领域的发展提供了基础。通过“根治海河”行动，成功改变了海河流域“十年九荒”的历史，体现了新中国政府致力于改善人民生活和发展经济的决心和行动力。 。	b	b	b	b	b	b	why
商会简明章程（1901年）商务繁官之区设立商务总会,商务发达稍次之地则设商务分会。商人通例（1904 年）肯定商人的地位,规定享有的权利和应遵循的通行规则等：公司律（1904 年）规定公司的创办程序、组织形式与经营方式,商办公司与官办公司、官商合办公司“享一体保护之利益”。奖给商勋章程（1906 年）凡制造新式机器者，奖以三等至一等商勋，赏加四品至二品顶戴。华商办理农工商实业爵赏章程（1907 年）凡条股创办企业的华商,根据资本额多少,可分别获一、二、三等子爵和三品卿、四品卿爵赏。——摘编自朱英《晚清经济政策与改革措施》等	根据材料，概括清末新政在振兴商务方面采取的措施。	通过广泛组织商会，制定商律保护商人开办公司的各项权益，对商人授予商勋和爵位，否定了抑商政策，提高了商人的社会地位，动摇了传统义利观，突破了旧式商业组织的束缚。	清末新政在振兴商务方面采取的措施包括设立商会、规范商人的权利和遵循的规则、规定公司的法律程序、奖励商业成就和授予爵位。	清末新政在振兴商务方面采取了一系列措施：设立商务总会与商务分会，制定相应的经商规则，规划管理公司，奖励制造机器，并实行爵赏制。	a	a	清末新政在振兴商务方面采取了一系列措施，旨在促进商业发展和经济现代化。以下是根据材料概括的主要措施： 1. 商会简明章程（1901年）：这一章程设立了商务总会和商务分会，区分了商务繁荣的地区和稍次之地，以便更有效地管理和促进商业活动。商务总会负责全国商业的统一管理，而商务分会则负责区域内的商业活动。 2. 商人通例（1904年）：这一规定肯定了商人的地位，并明确了商人享有的权利和应遵循的通行规则。通过这样的规定，旨在保护商人的合法权益，促进商业的自由和公平竞争。 3. 公司律（1904年）：公司律规定了公司的创办程序、组织形式与经营方式，包括商办公司、官办公司和官商合办公司。这些规定为商人创办和经营公司提供了法律框架，保障了公司的合法性和稳定性。 4. 奖给商勋章程（1906年）：这一章程奖励了制造新式机器的商人，通过授予商勋来表彰他们的创新和贡献。商勋的奖励分为三等至一等，相应的奖励包…	清末新政在振兴商务方面采取了多项措施，包括设立商务总会和商务分会、规定商人的地位和权利、制定公司的创办程序和经营方式、奖励商人创新、以及给予华商办理农工商实业爵赏等措施。这些措施促进了商务的发展和商人的壮大，为当时的商业环境提供了稳定和有利的发展条件。	tie	b	b	a	a	a	what
商会简明章程（1901年）商务繁官之区设立商务总会,商务发达稍次之地则设商务分会。商人通例（1904 年）肯定商人的地位,规定享有的权利和应遵循的通行规则等：公司律（1904 年）规定公司的创办程序、组织形式与经营方式,商办公司与官办公司、官商合办公司“享一体保护之利益”。奖给商勋章程（1906 年）凡制造新式机器者，奖以三等至一等商勋，赏加四品至二品顶戴。华商办理农工商实业爵赏章程（1907 年）凡条股创办企业的华商,根据资本额多少,可分别获一、二、三等子爵和三品卿、四品卿爵赏。——摘编自朱英《晚清经济政策与改革措施》等	根据材料并结合所学知识,简析材料中的法规、章程对传统商业的突破性意义。	否定了抑商政策，提高了商人的社会地位，动摇了传统义利观，突破了旧式商业组织的束缚。	根据材料中的法规和章程以及所学知识，可以看出其对传统商业的突破性意义。首先，这些法规和章程突破了重农抑商的传统观念，为商业的发展提供了更多的空间和机遇。其次，这些法规和章程丰富了商业组织形式，使得商业活动更加多样化和灵活。同时，它们激发了人民的创业热情，促进了经济的发展和繁荣。最重要的是，这些法规和章程肯定了商业发展对国家的重要性，为商业界的健康发展和国家经济的持续增长起到了积极的推动作用。	法规和章程对传统商业的突破性意义体现在几个方面：首先，它有利于激发民间生产积极性，使得商业活动更加活跃和多样化；其次，法规和章程的制定有利于提高生产力，推动商业领域的技术创新和发展；第三，法规和章程对传统商业的突破性意义还体现在促进资本主义经济的发展，为商业提供更加稳定和可持续的发展环境；此外，法规和章程的制定也有利于促进自然经济的进一步解体，推动商业向现代化方向发展；最后，加大了民间设功力度，使得商业活动更加规范和有序，为商业的健康发展提供了保障。	tie	b	根据材料，晚清时期的商会简明章程、商人通例、公司律、奖给商勋章程和华商办理农工商实业爵赏章程等法规和章程，对传统商业产生了重要的突破性意义。 首先，商会简明章程的设立商务总会和商务分会，标志着商业组织化的开始。商人不再仅仅是零星的交易者，而是形成了有组织、有章法的商业集团，这有助于商人之间的合作和资源的集中，推动了商业的发展。 其次，商人通例的制定，肯定了商人的地位，并规定了商人的权利和应遵循的规则。这有助于提升商人的社会地位，保障商人的合法权益，同时也为商人提供了一个遵循的标准，促进了商业活动的规范化和标准化。 再次，公司律的颁布，明确了公司的创办程序、组织形式和经营方式，为商人提供了合法的经营框架。公司律的规定使得商办公司、官办公司和官商合办公司享有同等的保护利益，这有助于平衡不同类型公司之间的竞争关系，促进了商业的多元化和健康发展。 最后，奖给商勋章程和华商办理农工商实业爵赏章程的…	根据材料中所述的各种章程和法规，可以看出清朝时期对商业领域进行了一系列的改革和规范，这些法规和章程为传统商业带来了一定的突破性意义。首先，商会简明章程和商人通例的出台肯定了商人的地位，规定了商人所享有的权利和应该遵循的规则，这为商业活动提供了更为稳定和有序的环境。其次，公司律的规定为公司的创办、组织和经营提供了具体的程序和方式，这有助于规范企业的运作，提高了商业效率。此外，奖给商勋章程和华商办理农工商实业爵赏章程的出台，为商人们提供了一定的奖励和荣誉，激励了他们更加积极地投身于商业活动中，推动了商业的发展。总的来说，这些法规和章程为传统商业带来了更多的规范和激励，促进了商业的发展和繁荣。 。	b	a	model_b	b	a	b	why
巴黎和会上,瓜分土耳其的中东阿拉伯领地时,法国坚持要占有包括黎巴嫩、巴勒斯坦、摩苏尔在内的大叙利亚。英国反对，认为大叙利亚的面积过大。即使法国放弃对巴勒斯坦和摩苏尔的要求后,英国仍不同意大叙利亚计划,逼得法国总理克里孟梭说,这样一来“留给劳合·乔治选择的只有枪或剑了”。关于如何处置战败国德国的殖民地和上耳其的中东阿拉伯领地,各主要国家接受了美国总统威尔逊倡议的“一四点原则”中的委任统治主张。即实行委任统治是因为“其居民尚不能自立”,接受委任统治的国家也就是接受了为“此等人民之福利及发展”的“文明之神圣任务”。——摘编自吴于産等主编《世界史》	根据材料并结合所学知识，概括英法发生的争执及其实质。	争执在于法国提出大叙利亚计划遭到英国反对，法国不惜以武力威胁，其实质是帝国主义国家争夺殖民地。	根据材料，英法发生争执的原因在于法国要求占有大叙利亚，而英国认为其面积过大，不同意法国的要求。这场争执实质上反映了一战结束后西方各国对利益分配的冲突。	英法发生的争执是关于瓜分土耳其的中东阿拉伯领地。法国坚持要占有包括黎巴嫩、巴勒斯坦、摩苏尔在内的大叙利亚。争执的实质是关于巴勒斯坦和摩苏尔的要求，这导致了总理克里孟梭感到被逼迫。	a	a	在巴黎和会期间，英法之间关于中东阿拉伯领地的瓜分引发了严重的争执。法国坚持要求占有包括黎巴嫩、巴勒斯坦、摩苏尔在内的大叙利亚地区，而英国则反对这一要求，认为大叙利亚的面积过大。即使法国放弃了对巴勒斯坦和摩苏尔的要求，英国仍然不同意大叙利亚计划。这场争执的实质是两国对于中东地区影响力和利益的竞争。 英国和法国的立场反映了当时各国在国际关系中的战略考量和帝国主义的特征。两国都希望在中东地区扩大自己的影响力和控制力，以此来巩固自己的地缘政治地位和经济利益。这种竞争不仅体现在领土分配上，也体现在对当地资源和人口的控制上。 此外，争执还体现了当时国际社会对于如何处理战败国德国的殖民地和上述中东阿拉伯领地的不同看法。各主要国家接受了美国总统威尔逊倡议的“一四点原则”，其中包括委任统治的主张。这种委任统治的实质是将这些地区的管理权交给更为“文明”的国家，以便为这些“尚不能自立”的居民提供“福利及发展”…	根据材料所述，英法在巴黎和会上发生争执的实质是关于瓜分土耳其的中东阿拉伯领地时，法国想要占有大叙利亚，包括黎巴嫩、巴勒斯坦、摩苏尔在内，而英国认为大叙利亚的面积过大。尽管法国放弃了对巴勒斯坦和摩苏尔的要求，但英国仍不同意大叙利亚计划。这导致法国总理克里孟梭表示，留给英国首相劳合·乔治的只有枪或剑选择。实质上，这是关于殖民地瓜分的争夺，各国力图通过委任统治来控制殖民地，但在具体领土分配上产生了矛盾。英法争执的根本原因是对殖民地利益和影响力的争夺。。	a	b	b	a	a	a	what
巴黎和会上,瓜分土耳其的中东阿拉伯领地时,法国坚持要占有包括黎巴嫩、巴勒斯坦、摩苏尔在内的大叙利亚。英国反对，认为大叙利亚的面积过大。即使法国放弃对巴勒斯坦和摩苏尔的要求后,英国仍不同意大叙利亚计划,逼得法国总理克里孟梭说,这样一来“留给劳合·乔治选择的只有枪或剑了”。关于如何处置战败国德国的殖民地和上耳其的中东阿拉伯领地,各主要国家接受了美国总统威尔逊倡议的“一四点原则”中的委任统治主张。即实行委任统治是因为“其居民尚不能自立”,接受委任统治的国家也就是接受了为“此等人民之福利及发展”的“文明之神圣任务”。——摘编自吴于産等主编《世界史》	根据材料并结合所学知识,围绕英法争执,评价威尔逊的委任统治主张。	被纳入国联盟约，暂时解决了英法争执，但没有根本解决列强之间矛盾，暴露了美国意图领导世界的野心，并未改变殖民统治的实质。	。 ②威尔逊的委任统治主张是一种虚假的道德掩饰，实质上是为了继续殖民掠夺。他试图通过美化殖民主义的手段，掩盖西方列强对他国资源的掠夺行为。 ③委任统治只是一种形式上的改变，而不是实质上的解决问题。威尔逊的所谓“文明之神圣任务”只是为了继续维持殖民主义的统治，并没有真正为被殖民地的人民谋福利。 ④威尔逊的委任统治主张缺乏真诚性和公正性，只会加剧殖民地的困境，无法真正促进被殖民地的发展和繁荣。因此，这一主张并不能被看作是对殖民主义的改变和进步，而只是对殖民掠夺的一种掩盖和延续。	威尔逊的委任统治主张是在英法争执中提出的。根据材料显示，威尔逊认为，处置战败国德国的殖民地应该采取一种委任统治的方式，以更好地接受大自然的万事万物。这一主张也与他提出的“一四点原则”相契合，主张和解即智慧。 综合来看，威尔逊的委任统治主张在当时具有一定的合理性。通过委任统治，可以保障战败国德国的殖民地得到更好的管理和发展，同时也有利于维护国际公平和秩序。此外，这也符合和解即智慧的理念，有利于减少战争带来的破坏和伤害。因此，威尔逊的委任统治主张在当时是一种积极的尝试，为国际关系的发展和和平做出了一定的贡献。	a	b	威尔逊的委任统治主张在当时的国际政治背景下被视为一种试图在战后重建中维护国际秩序和促进殖民地居民福祉的方案。然而，英法争执的具体情况揭示了这种主张在实践中可能遇到的挑战和问题。 首先，英法争执表明，即使是同盟国之间，也存在对殖民地和战后领土安排的不同看法和利益冲突。这种分歧可能导致国际关系的紧张和冲突，这与威尔逊的委任统治主张旨在通过国际合作和协调来实现和平的初衷相悖。 其次，委任统治的理念基于“其居民尚不能自立”的前提，这种观点忽视了殖民地居民的自我管理能力和自决权。这种观念在当时的国际关系中是普遍存在的，但它忽略了殖民地居民的复杂多样性和他们对自决的渴望。随着时间的推移，这种观念被批判为一种帝国主义的遗留，忽视了殖民地人民的主权和自决权。 最后，委任统治的实践可能导致殖民地国家长期依赖外国的管理，而不是发展出自己的治理能力和自主性。这可能导致殖民地国家在政治、经济和社会方面的不平等发…	根据材料和所学知识，可以看出威尔逊的委任统治主张是基于一种“文明的使命”的观念，即认为殖民地需要受到委任统治，因为居民尚不能自立，需要外部势力来帮助他们发展和提高生活水平。然而，这种观念也存在一定的问题。首先，委任统治可能会导致殖民地居民的权利被侵犯，他们无法自主决定自己的发展方向。其次，委任统治可能会过度强调殖民地的经济利益，而忽视了当地居民的文化和传统。在英法争执中，英国反对法国占有大叙利亚的立场可能也与对委任统治的疑虑有关，认为法国可能会滥用委任统治的权力。总的来说，威尔逊的委任统治主张在一定程度上具有一定合理性，但也存在着一些实施上的困难和潜在问题。	tie	a	a	a	b	b	others
苏绰(498~546),武功(今陕西扶风)人。他“博览群与,尤善算术”,深受西魏执政者宇文泰信任，委以政事。西魏立国之初，疆城狭小，民族关系复杂，经济文化落后。为强国富民，苏綽建议减官员、适屯曰，并创“朱出墨入，及计帐、户籍之法”，为后世财政、会计领域长期沿用。他又制定“六条诏书”，包括先治心、敦教化、尽地利、擢贤良、恤狱讼、均赋役等内容，字文泰“甚重之，常置诸座右。又令百司习诵之。其牧守令长，非通六条及计帐者，不得居官”。通过“六条诏书”等改革，西魏成功凝聚起民心，由弱变强，为后来北周统一北方乃至隋统一全国奠定了基础。苏绰“性俭素,不治产业……常以天下为已任，博求贤俊,共弘治道,凡所荐达,皆至大官”。在“积思劳倦”十余年后,苏绰因病去世,字文泰“痛惜之,哀动左右”。	根据材料，简析苏绰被宇文泰倚重的原因。	具备才能超群尤善理财，政绩卓著，克己奉公和推荐人才等特点。	苏绰之所以被宇文泰倚重，一是因为他个人才能突出，有利于帮助宇文泰巩固政权。二是因为苏绰的忠诚让宇文泰放心任用他。三是因为苏绰有一种忧国忧民之心，而没有谋权之心。四是因为他能制定利国利民的有效政策，有利于稳定社会和实现富强。	苏绰之所以得到宇文泰的重用，主要原因有几点：首先，苏绰博览群书，尤其擅长算术，具备较高的素质；其次，他重视求贤纳贤，推举有才之人，具有很强的团队合作意识；再者，他能克己奉公，为国家利益着想；此外，苏绰在治理国家时采取了有利于国家发展的措施，在国家经济管理上表现出了成果，展现出了责任担当的精神。这些优点使得宇文泰对苏绰十分器重。	b	b	苏绰被宇文泰倾心信任的原因主要有以下几点： 1. 学识渊博：材料中提到苏绰“博览群书，尤善算术”，这表明他在学识上具有很高的造诣，尤其在算术和财政管理方面有深厚的功底。这种学识背景使他在处理国家政务时能够提供专业的建议和解决方案。 2. 政治智慧：苏绰不仅学识渊博，他还能够将学识运用到实际政治中，提出了一系列改革措施，如减官员、适屯曰、创“朱出墨入，及计帐、户籍之法”等，这些措施对于改善国家财政、加强国力建设具有重要意义。宇文泰看到了这些改革的价值和潜力，自然会对苏绰抱有高度的信任。 3. 政治改革成效：苏绰提出的“六条诏书”不仅体现了他对国家治理的深刻理解，还通过实施这些改革，西魏成功凝聚起民心，国力逐渐增强。宇文泰作为西魏的执政者，自然会对能够带来实际成效的顾问抱有深厚的信任。 4. 人格魅力和道德品质：材料中提到苏绰“性俭素，不治产业……常以天下为已任，博求贤俊，共弘治道”，这说明…	苏绰被宇文泰倚重的原因主要有几点。首先，苏绰具有博学多才的特点，擅长算术等各种技能，这使得他在处理政务时能够运用丰富的知识和技能，为国家提供有效的建议和方案。其次，苏绰提出了许多重要的改革措施，如减官员、适屯曰、朱出墨入等，这些措施在财政、会计等领域产生了深远的影响，为国家的发展奠定了基础。此外，苏绰在制定“六条诏书”等法规时，注重教化和治国理念，能够凝聚民心，使国家由弱变强。最后，苏绰在为官期间表现出俭朴、诚实、重视人才等美德，深得宇文泰信任和推崇。总的来说，苏绰被宇文泰倚重的原因在于他的才华、智慧、改革精神以及为政务、国家利益着想的态度。 。	a	b	b	b	b	b	why
苏绰(498~546),武功(今陕西扶风)人。他“博览群与,尤善算术”,深受西魏执政者宇文泰信任，委以政事。西魏立国之初，疆城狭小，民族关系复杂，经济文化落后。为强国富民，苏綽建议减官员、适屯曰，并创“朱出墨入，及计帐、户籍之法”，为后世财政、会计领域长期沿用。他又制定“六条诏书”，包括先治心、敦教化、尽地利、擢贤良、恤狱讼、均赋役等内容，字文泰“甚重之，常置诸座右。又令百司习诵之。其牧守令长，非通六条及计帐者，不得居官”。通过“六条诏书”等改革，西魏成功凝聚起民心，由弱变强，为后来北周统一北方乃至隋统一全国奠定了基础。苏绰“性俭素,不治产业……常以天下为已任，博求贤俊,共弘治道,凡所荐达,皆至大官”。在“积思劳倦”十余年后,苏绰因病去世,字文泰“痛惜之,哀动左右”。	根据材料并结合所学知识，概括“六条诏书”的历史意义。	为官员建立了行为规范，促进了经济发展，推动了统一，凝聚起民心，促进和推动了民族融合。	“六条诏书”历史意义在于稳定社会、推动经济发展，增强国家综合国力，为国家走向统一奠定基础。	“六条诏书”对于历史的意义在于以下几个方面：首先，有利于西魏实现强国富民的目标；其次，通过项进西魏的统一和聚民心，促进了经济的迅速发展；再者，为后来北周统一北方至隋统一全国奠定了基础；此外，这些诏书有利于统一多民族国家的形成，促进了民族融合。	b	b	"六条诏书"是苏绰在西魏时期提出的政治、经济和文化改革措施，它们对于西魏乃至后来的北周和隋朝统一北方乃至全国具有深远的历史意义。以下是"六条诏书"的主要内容及其历史意义： 1. 先治心：强调以德治国，重视心性教育，培养官员的道德品质，这有助于建立一个公正、和谐的社会环境。 2. 敦教化：推崇教育，重视文化的传播和人才的培养，这有助于提高国民的文化素质和国家的整体素质。 3. 尽地利：根据不同地区的自然条件和资源特点，制定合理的经济政策和发展规划，促进经济的均衡发展。 4. 擢贤良：选拔和提拔有才能的人才到关键的行政和军事岗位上，确保国家政策的有效执行和国家的稳定发展。 5. 恤狱讼：减轻人民的负担，简化法律程序，减少冤狱和冤讼，保护人民的合法权益，增强人民对政府的信任。 6. 均赋役：合理分配赋税和徭役，减轻人民的负担，提高国家的财政收入，促进社会的和谐稳定。 "六条诏书"的历史意义在于…	根据材料和所学知识，可以概括“六条诏书”的历史意义为：通过“六条诏书”等改革，苏绰成功凝聚了民心，帮助西魏由弱变强，为后来北周统一北方乃至隋统一全国奠定了基础。这些诏书包括先治心、敦教化、尽地利、擢贤良、恤狱讼、均赋役等内容，为当时的政治、经济和社会秩序带来了积极的影响，促进了国家的稳定和繁荣。这些改革措施在财政、会计、治理等领域长期发挥作用，对中国古代政治制度和社会发展产生了深远影响。 。	a	b	b	a	b	b	what
明清时期,江南市镇进入发展与繁荣阶段,其内部的手工业也在这一时期得到了发展。农副产品加工行业以及农家生产、生活服务的各类手工行业在市镇得到普遍发展。双林镇随着江南农村棉花、蚕桑的等经济作物的广泛种植及农家经济商品化的发展,棉织、丝织等所产包头绢,“明正德、嘉靖以前仅有高溪纱帕,隆庆、万历以后机户巧变百出,名目甚繁,”濮院镇亦在“万历间改土机为纱绸,制造绝工,濮绸之名驰誉海内”,这一时期江南还出现了一批市镇,如长洲县的陆墓镇,“居民多造窑及织汗巾为业”;吴江县的村市,居民数百家,铁工过半;桐乡县的陈庄“居民多以竹器为业”,且家庭手工业在此类市镇已成为脱离小农业与小商业的专业性商品生产。私营小作坊手工业同样广泛存在于当时江南各市镇中,并雇有染工数名,“受值于人一日谓“一工””。在明清江南手工业的专业市镇中,手工业生产已占据了市镇经济的主导地位,此类市镇因而形成了商品生产为主的经济结构,而在苏…	根据材料一并结合所学知识，概括明清之际江南市镇手工业发展的特点并分析其原因。	特点包括产品商品化，技术水平的专业化，出现了早期的资本主义萌芽，内部分工的精细化，出现手工业专业市镇，各市镇手工业发展具有不平衡性。其原因是明清时期江南地区的进一步开发，江南市镇手工业者之间的竞争，市民阶层的壮大与发展，商品经济的发展。	明清之际江南市镇手工业发展的特点包括生产种类多、品质优良并畅销国外，同时出现了准解关系，手工业生产占据市镇经济的主导地位，尤其是国棉纺织业发展迅速。这一现象的原因在于市镇经济的推动和商品经济的繁荣，统治者放宽限制并鼓励发展手工业，同时打破了时间和空间上的限制，加上当时市层阶级活跃、文化繁荣丰富等因素的共同作用。	明清之际江南市镇手工业发展的特点主要体现在产品商品化增强程度高、规模大、普遍发展、专业化程度高、多私营手工业以及多雇佣关系。这些特点的形成主要是由于商品经济的不断发展、国家政策的放宽、国家财政税收的需要、生产的发展、生产关系的变化以及思想的解放等原因所致。在国家相对稳定的背景下，明清之际江南市镇手工业得以蓬勃发展。	tie	b	明清之际江南市镇手工业发展的特点主要体现在以下几个方面： 1. 手工业的专业化和规模化：随着经济作物的种植和农家经济商品化，手工业逐渐从家庭副业转变为专业化生产。例如，双林镇的棉织和丝织业，以及濮院镇的纱绸制造，已经形成了专业的生产线和工艺流程。 2. 技术创新和工艺发展：在明正德、嘉靖以前，江南市镇的纺织品主要是高溪纱帕，到了隆庆、万历时期，机户们不断创新，生产出了各种各样的包头绢和其他纺织品。濮院镇的改土机为纱绸制造也展现了当时的技术进步。 3. 市镇经济结构的变化：手工业生产在江南市镇中占据了主导地位，形成了商品生产为主的经济结构。市镇居民的生活方式和经济活动也随之发生了变化，更多地依赖于手工业生产而非传统的农业。 4. 私营小作坊的普遍存在：私营小作坊在江南市镇中非常普遍，它们雇佣了染工，形成了一种新的生产模式。这种模式的出现促进了手工业的发展和规模化。 5. 市镇的专业化和多样…	明清时期江南市镇手工业的发展特点主要表现在农副产品加工行业、农家生产、生活服务手工业以及棉织、丝织等行业的繁荣。这一时期的江南市镇手工业主要原因包括：一是江南地区农业经济发达，农产品丰富，为手工业提供了原材料基础；二是农家经济商品化的发展，推动了手工业的发展；三是家庭手工业成为脱离小农业与小商业的专业性商品生产，形成了市镇经济的主导地位；四是私营小作坊手工业广泛存在，雇用染工等专业工人，促进了手工业的技术水平提高。总体来说，明清时期江南市镇手工业发展的特点是以农产品加工为主，农家经济商品化为推动力，家庭手工业成为专业性商品生产的主要形式。。	a	b	a	b	b	b	why
早在15世纪的英国,商人先到市场上购买羊毛,交给各家纺工纺成毛线,他再收取毛线,分给各家织工织成毛呢,收取成品出售,付给纺工、织工以工资,这时纺工、织工多为农家妇女,没有集中的厂房设备。到16世纪,集中的手工工场如雨后春笋般出现。伦敦西部纽伯利一个名叫约翰·温彻康布的纺织业商人,在16世纪初就拥有一个约千人的手工工场,其中男女织工、纺工和助手600人,梳毛、理毛工250人,修正工50人,染工40人,研工20人。随着集中的手工工场的发展,越来越多的小生产者经受不住竞争,变为雇工。就这样,英国的毛纺织业得到迅速发展,毛制品输出激增,英国的呢绒逐渐在欧洲市场上占据首要地位,毛纺织业成了英国的“民族工业”。摘编自郑玮《资本主义工场手工业时期的阶段特征》	根据材料二并结合所学知识，指出 15~16世纪英国工场手工业发生的变化及其影响。	变化是由分散走向集中，由家庭手工业生产为主走向雇佣型生产，专业化和分工协作水平提高。其影响是手工业集中生产有利于节省原料，生产过程的分工不仅有利于提高劳动生产率，也增加了改进技术的机会，为英国工业革命奠定了基础。	在15~16世纪的英国工场手工业发生了许多变化。首先，随着工业革命的兴起，机械化生产开始取代传统的手工业生产方式，导致许多手工业工匠失业。其次，工场手工业的规模逐渐扩大，生产效率得到提高，但对工人的劳动条件和待遇也带来了负面影响。 这些变化使得15~16世纪的英国工场手工业面临着矛盾和挑战。工匠们面临着失业和生计困难的问题，同时工业资本家们追求更高的利润，加剧了阶级矛盾。然而，这种矛盾也激发了工人们的斗争意识，他们开始组织起来争取自身权益，推动了工人运动的兴起。 总的来说，15~16世纪英国工场手工业的变化不仅影响了工匠和工业资本家的利益关系，也推动了工人阶级意识的觉醒和组织起来争取权益的斗争。这些矛盾和斗争在一定条件下相互转化，促进了工业发展和社会变革。	在15~16世纪，英国工场手工业发生了一系列变化，主要包括由分散变为集中的手工工场、小生产者大多变为雇工以及出现大规模的手工工场。这些变化带来了一系列积极影响。首先，这些变化推动了经济的高速发展，节省了原料并提高了生产效率，从而增加了产量。其次，商品专业化程度逐渐加深，生产更加精细化。最重要的是，这些变化为工业革命奠定了基础，为现代工业的兴起铺平了道路。	b	b	在15世纪的英国，商人在市场上购买羊毛，然后将其交给纺工手工纺成毛线，再将毛线分给织工手工织成毛呢。商人收取成品并出售，支付给纺工和织工工资。在那个时期，纺织工和织工主要是农家妇女，没有集中的厂房和设备。 到了16世纪，集中的手工工场开始出现。例如，约翰·温彻康布在伦敦西部的纽伯利拥有一个大型的手工工场，拥有约千名工人，其中包括男女织工、纺工和助手、梳毛、理毛工、修正工和染工等。随着集中的手工工场的发展，小生产者越来越难以承受竞争，最终变成了雇工。 这些变化对英国的毛纺织业产生了深远的影响。随着集中的手工工场的发展，毛纺织业的生产效率和规模迅速增加，毛制品的输出量大幅增长。英国的呢绒产品在欧洲市场上逐渐占据了主导地位，毛纺织业成为了英国的“民族工业”。 这些变化也标志着工场手工业时期的开始，这一时期的特点是手工艺人的集体劳动和较为复杂的生产过程。虽然还没有机器的介入，但集中的工场已经开始…	根据材料二和所学知识，15~16世纪英国工场手工业发生了从分散的小生产者向集中的手工工场转变的变化。这种转变导致了越来越多的小生产者无法承受竞争而变为雇工，从而加速了工业化的进程。集中的手工工场的出现提高了生产效率，使得毛纺织业得到了迅速发展。随着工场规模的扩大和生产效率的提高，英国的毛制品输出激增，英国的呢绒在欧洲市场上占据了首要地位，毛纺织业成为了英国的“民族工业”。这种变化使得英国的经济得到了提升，同时也为后来的工业革命奠定了基础。	b	b	b	b	b	b	what
从春秋中叶到晚期大约一百多年的时间里,从齐国发轫,晋、鲁、楚、郑等主要诸侯国先后进行了一系列的土地赋税改革,首先废除籍法,将公田分给国人,同时对国人开始征收实物税;其次,将原先仅由国人承担的军赋推广及野人。其中,鲁国的“初税亩”与“作丘甲”相距四年,郑国的第一次土地规划到“作丘赋”相距五年,晋国的“作爱田”与“作州兵”更是在同一年，而现有资料表明，楚国的改革也是在同一年进行。这也反证了我们对这场改革模式的基本判断,两步走是为了分别调整对国人和野人的剥削关系,在维持社会矛盾基本均衡的基础上,大幅度增加了国家的财政收入。改革后各国的军事力量有了明显的增长。其他诸侯国也应当改革军赋起征之法,使之和田税一样,统一按地亩征收。“等到战国中期商鞅变法后，农民逐渐丧失土地，赋才变为按人口征收货币”。摘编自李忠林《春秋时期军赋制度改革辨析》	根据材料并结合所学知识，分析春秋时期诸侯国进行军赋制度改革的原因。	原因是争霸战争的现实需要，土地私有制的发展，社会生产力的进步和社会转型的加快。	在春秋时期，诸侯国的实力不断壮大，为了满足发展的需要和军事后备力量的缺乏，诸侯国开始进行军赋制度改革。此外，诸侯国也意识到需要巩固统治，通过改革军赋制度来加强自身的实力和控制力。同时，春秋时期的争霸局势也对诸侯国进行军赋制度改革产生了影响，促使他们加强军事力量，以应对复杂的外部环境和竞争对手的威胁。这些因素共同推动了诸侯国在春秋时期进行军赋制度改革的步伐。	春秋时期诸侯国进行军赋制度改革的原因主要包括以下几点：一是土地赋税改革的推动，二是为了巩固统治，缓和社会矛盾，三是适当满足国家发展需要，四是为了增强军事力量。这些因素共同推动着诸侯国在军赋制度上进行改革，以应对当时的社会政治环境和军事需求。	a	a	春秋时期诸侯国进行军赋制度改革的原因主要是为了调整和优化国家的财政收入和军事力量。这些改革的核心在于废除旧的籍法，实行按地亩征收实物税，并将军赋制度推广到野人，实现了对国人和野人的剥削关系的调整。 首先，废除籍法意味着不再依赖传统的氏族或家族关系来确定个人对国家的贡献，而是根据实际拥有的土地来征收税赋。这种改革有助于国家更准确地了解国人的经济状况，并根据实际生产能力来征税，从而提高税收的效率和公平性。 其次，将军赋制度推广到野人，意味着国家可以扩大征收的范围，包括那些不属于传统氏族或家族的个人。这样做不仅增加了国家的财政收入，还有助于巩固国家对外来人口的控制，减少野人对国家的潜在威胁。 此外，这些改革还促进了社会矛盾的基本均衡。通过调整税赋制度，国家可以减少对某些特定群体的过度剥削，减轻他们的负担，从而在一定程度上缓解社会矛盾。 最后，改革后各国的军事力量得到了明显的增长。因为税赋制度的…	根据材料所述，春秋时期诸侯国进行军赋制度改革的主要原因包括两点：一是调整对国人和野人的剥削关系，通过废除籍法、将公田分给国人以及征收实物税等措施，来平衡社会矛盾，增加国家财政收入，以维持社会稳定；二是增强各国的军事力量，通过改革军赋制度，以备战争时期的需要。 此外，诸侯国进行军赋制度改革的另一个重要原因是为了适应当时政治和军事形势的变化。在春秋时期，诸侯国之间的战争频繁，需要强大的军事力量来保卫国家，因此对军赋制度进行改革，以增强军队的战斗力，是当时诸侯国的一个重要举措。 综上所述，春秋时期诸侯国进行军赋制度改革的原因主要包括调整社会矛盾、增加财政收入、增强军事力量以及适应政治和军事形势的变化等因素。 。	b	a	model_b	b	a	b	why
从春秋中叶到晚期大约一百多年的时间里,从齐国发轫,晋、鲁、楚、郑等主要诸侯国先后进行了一系列的土地赋税改革,首先废除籍法,将公田分给国人,同时对国人开始征收实物税;其次,将原先仅由国人承担的军赋推广及野人。其中,鲁国的“初税亩”与“作丘甲”相距四年,郑国的第一次土地规划到“作丘赋”相距五年,晋国的“作爱田”与“作州兵”更是在同一年，而现有资料表明，楚国的改革也是在同一年进行。这也反证了我们对这场改革模式的基本判断,两步走是为了分别调整对国人和野人的剥削关系,在维持社会矛盾基本均衡的基础上,大幅度增加了国家的财政收入。改革后各国的军事力量有了明显的增长。其他诸侯国也应当改革军赋起征之法,使之和田税一样,统一按地亩征收。“等到战国中期商鞅变法后，农民逐渐丧失土地，赋才变为按人口征收货币”。摘编自李忠林《春秋时期军赋制度改革辨析》	根据材料并结合所学知识，概括春秋时期诸侯国进行军赋制度改革的影响。	影响是有利于增加诸侯国的财政收入，增强了各诸侯国的军事实力，推动了土地私有化，推动了商品经济的发展。	春秋时期诸侯国进行军赋制度改革，推动了军事力量的发展，军队实力大增。同时增加了国家的财政收入，推动了国家的经济发展。这一改革还维护了社会秩序，有利于国家的政治建设。最重要的是，这一改革为后世的改革提供了宝贵的经验。	春秋时期诸侯国进行军赋制度改革对国家产生了积极影响。这种改革有利于增强国家实力，巩固统治，促进军力的增长，增加国家经济实力，缓和社会矛盾，维护社会稳定。	tie	b	春秋时期诸侯国进行军赋制度改革的影响主要体现在以下几个方面： 1. 社会矛盾的调整：改革首先废除了籍法，将公田分给国人，调整了国人与野人的剥削关系，减轻了国人负担，提高了他们的生活水平。同时，通过改革，国家能够更有效地控制和调配资源，减少了社会矛盾和冲突。 2. 国家财政收入的增加：改革后，国家通过对国人和野人实行按地亩征收的实物税，实现了对国家财政收入的大幅度增加。这种制度的实施有助于国家加强军事力量，进行更多的外交活动和扩张。 3. 军事力量的增强：改革后各国的军事力量得到了明显的增长。由于国家财政收入的增加，能够更好地装备和训练军队，提高军事实力。例如，鲁国的“初税亩”与“作丘甲”相距四年，晋国的“作爱田”与“作州兵”在同一年进行，这说明改革对军事力量的增强有着直接的促进作用。 4. 法制的完善：改革也推动了法制的完善。通过对土地和税收制度的规范，国家能够更好地控制和管理社会经济活…	根据材料和所学知识，可以概括春秋时期诸侯国进行军赋制度改革的影响有三个方面：首先，通过废除籍法、将公田分给国人以及征收实物税，国家财政收入大幅增加，从而增强了国家的财政实力和军事力量；其次，军赋制度改革促进了社会矛盾的基本均衡，减轻了对国人和野人的剥削，有利于社会稳定和发展；最后，军赋制度改革为后来的变法奠定了基础，如商鞅变法后的货币征收制度，进一步影响了农民的土地所有权和赋税方式。综合来看，春秋时期诸侯国进行军赋制度改革对社会经济和政治都产生了积极的影响。	a	b	tie	a	b	a	what
范旭东原名源让,湖南湘阴县人。1908年,考入京都帝国大学理学院学应用化学,其间，目睹日中现状，遂立志创办中国化学工业实业救国，于是改名范锐，字旭东。当时北洋政府对盐政有改革之意,范旭东被派赴欧洲考察了解盐碱工业。1913年底,范旭东回国筹备创办盐厂。究竟在哪里建厂，范旭东的目光落在了塘沽，“这里最合适不过”，塘沽是渤海湾天然盐都，海陆交通方便，尽管当时的塘沽还是一片荒凉的盐碱地。1914 年 7月，他在塘沽创办久大精盐公司。至1918年,久大已发展为国内颇具规模的近代化工厂了。久大接收了德国在塘沽的铁路支线,收买沿海河的俄国码头,将“天津盐”打入长江流域。1925年,久大精盐公司已是中国最大的精盐制造企业,产盐量由最初的3万担增至50万担,约合3万吨。	根据材料并结合所学知识，说明范旭东筹建久大精盐公司的有利条件。	条件是受列强侵略，天津自然经济解体较早，民国政府的支持，优越的资源，塘沽是渤海湾天然盐都，具有交通区位优势、塘沽海陆交通方便。	范旭东筹建久大精盐公司的有利条件包括：国家政策的支持、个人的才华、借鉴了西方盐碱工业、有良好的地理环境以及交通便利。	范旭东筹建久大精盐公司的有利条件主要体现在政策支持和厂址的有利条件方面。首先，政府出台了支持创办企业的改革政策，为企业提供了良好的发展环境和政策支持。其次，久大精盐公司选择的厂址具有有利条件，可能包括交通便利、资源丰富、人才辐射等方面的优势。这些有利条件有助于久大精盐公司在竞争激烈的市场中获得更好的发展机遇和竞争优势。	b	b	范旭东筹建久大精盐公司的有利条件主要包括以下几点： 1. 地理位置优势：塘沽地处渤海湾，是中国著名的盐都，拥有丰富的天然盐资源。同时，塘沽的海陆交通便利，能够便捷地与国内外市场连接，促进盐的运输和销售。 2. 政治支持：北洋政府对盐政有改革之意，并派遣范旭东赴欧洲考察了解盐碱工业，这表明政府对盐业的发展给予了一定的支持和认可。 3. 资本和技术引进：范旭东在考察欧洲期间，可能接触到了先进的盐业生产技术和管理经验。久大精盐公司在创办之初就接收了德国在塘沽的铁路支线，并收买了沿海河的俄国码头，这些都为公司的发展提供了物质基础和技术支持。 4. 市场需求：随着中国社会的发展和工业化进程，国内对高质量的精盐需求增加，久大精盐公司能够满足这一市场需求，逐渐发展成为国内颇具规模的近代化工厂。 5. 个人能力和决心：范旭东本人具有较强的专业知识和国际视野，他在日本学习的经历和对中国现状的认识，激发了他…	范旭东筹建久大精盐公司的有利条件主要包括以下几点： 1. 地理位置优越：范旭东选择在塘沽建厂，这里是渤海湾天然盐都，海陆交通方便。这样的地理位置使得原材料和产品的运输更加便利，有利于降低生产成本。 2. 政府支持：当时的北洋政府对盐政有改革之意，派遣范旭东赴欧洲考察了解盐碱工业。这种政府的支持为久大精盐公司的发展提供了有力保障。 3. 先进技术和设备：范旭东考察欧洲，学习先进的盐碱工业技术，引进了德国的铁路支线和俄国的码头。这些先进技术和设备的引进有助于提高生产效率和产品质量。 4. 市场需求：当时中国盐业市场需求大，久大精盐公司在短时间内就发展为国内颇具规模的近代化工厂，产盐量大幅增长。这说明范旭东在选择创办盐厂时，抓住了市场需求旺盛的机会。 总的来说，范旭东筹建久大精盐公司的有利条件包括地理位置优越、政府支持、先进技术和设备以及市场需求旺盛等方面。这些条件的综合作用促使久大精盐公司快…	tie	b	b	a	b	b	what
材料关于中国古代文献数量,有学者认为有10万种,也有估为7万~8万种,2009年版的《中国古籍总目》则为177 107种,中国文献至少需从甲骨卜辞算起,至春秋战国时期,简册日趋丰富,但直至南朝范晔的《后汉书》中方有关于图书买卖的记叙。至明代,商业出版日趋繁荣,但仍以雕版为主,整个明代出版书籍至多2万种左右,这一数据在清中期以前也未出现显著跃升。钱存训曾指出,在中国传统社会中,印刷术的主要功能是“传先哲之精蕴,启后学之困蒙,亦利济之先务,积善之美谈”。中国文献在发展阶段上没有明显的中辍和低潮期,即使历经灾荒、改朝换代以及外族的入侵,文献传统也能一次又一次地得到恢复。此外,由于儒家思想的核心是整顿衰弊的现实世界并恢复远古黄金世界的辉煌,因此阐释经典以发现前往“大同”的道路,成为思想文化最根本的建设手段,“述而不作”进而变成一种思想和方法原则。正如《四库全书总目》所谓“经禀圣裁,垂型万世,删定…	根据材料一、二并结合所学知识，概括中西方文献发展的异同。	相同点在于历史悠久数量恢宏，都存在精英化的特点。不同点在于中国古代文献发展的商业化晚而慢，西方则是早而快，前者具有连续性的特点，后者则存在较长的断层期，前者发展速度较慢，后者则在1500年后迎来了快速发展期，前者在内容上具有一定统一性，后者则存在明显的地域差异性，前者的创作以继承为主、创新为辅，后者在近代以后更具创新性。	根据材料一、二以及所学知识，可以看出中西方文献发展的异同。在相同之处，两者都是为了满足统治者的需要而产生的。然而，在不同之处，中文献的规模庞大，数量多达17万多种，并且保存较为完好；而西方文献的数量相对较少，大约在3万到3万5千多种之间，且受到文盲程度高和文化差异大的影响。	中西方文献发展的异同可以总结为，两者历经低谷期，传承方式以印刷术为主要手段。不同之处在于，中国统治者重视文献大发展，国民素质较高，整顿文献中消极内容以繁荣世界文化；而西方执政者将政治与图书分离开来管理，国家差异明显，出现地方差异的分区。	b	b	根据材料一、二并结合所学知识，中西方文献发展的异同可以概括如下： 异同一：文献数量与发展阶段 - 中方：中国古代文献数量有学者估计为10万种至7万~8万种，2009年版的《中国古籍总目》收录了177,107种。中国文献的发展从甲骨文开始，至明代出版书籍数量至多2万种左右，清中期前未见显著增长。中国文献在发展过程中没有明显的中断和低潮期，能够在灾荒、改朝换代和外族入侵中恢复传统。 - 西方：欧洲的文献发展起步较晚，希腊字母约公元前11世纪形成，至公元前5世纪后期出现图书业，公元前1世纪左右罗马出现书店。公元6世纪左右，许多珍贵藏书消失，直至10到12世纪才略有好转。公元1500年之前，欧洲印刷书版本多达3万至3万5000种，总发行量约1500万至2000万册。欧洲的印刷书籍数量和发行量在1500年后迅速增长，至1800年已超60万种。 异同二：印刷术的发展与功能 - 中方：印刷术在中国传统…	根据材料一和材料二以及所学知识，可以看出中西方文献发展的异同点。在中国，古代文献数量虽然众多，但印刷术的主要功能是传承先哲之精华，启蒙后学，积善之美谈。中国文献在历经灾难、政权更迭等情况下，能够得到恢复，儒家思想也深刻影响了文献的发展。而在西方，希腊、罗马时期已出现书店、图书业，私人图书馆也逐渐兴起。欧洲的印刷书籍数量在15世纪之后急剧增加，知识体系不断更新，但文盲率仍然较高。另外，各国对图书审查的扩大、地方语言书籍的兴起等因素，导致欧洲各国的出版市场长期隔绝。综合来看，中西方文献发展的异同在于文献数量、印刷术的功能、文化传承方式等方面存在一定差异。。	a	b	b	b	b	b	what
材料关于中国古代文献数量,有学者认为有10万种,也有估为7万~8万种,2009年版的《中国古籍总目》则为177 107种,中国文献至少需从甲骨卜辞算起,至春秋战国时期,简册日趋丰富,但直至南朝范晔的《后汉书》中方有关于图书买卖的记叙。至明代,商业出版日趋繁荣,但仍以雕版为主,整个明代出版书籍至多2万种左右,这一数据在清中期以前也未出现显著跃升。钱存训曾指出,在中国传统社会中,印刷术的主要功能是“传先哲之精蕴,启后学之困蒙,亦利济之先务,积善之美谈”。中国文献在发展阶段上没有明显的中辍和低潮期,即使历经灾荒、改朝换代以及外族的入侵,文献传统也能一次又一次地得到恢复。此外,由于儒家思想的核心是整顿衰弊的现实世界并恢复远古黄金世界的辉煌,因此阐释经典以发现前往“大同”的道路,成为思想文化最根本的建设手段,“述而不作”进而变成一种思想和方法原则。正如《四库全书总目》所谓“经禀圣裁,垂型万世,删定…	综合上述材料并结合所学知识,谈谈你对郑氏兄弟观点的认识。	认识是郑氏兄弟的观点是在近代救亡图存的背景下提出的，具有一定的时代局限性，世界文明没有优劣之分，要坚持民主平等的理念。	根据综合材料和所学知识，我认为郑氏兄弟的观点是非常值得肯定的。中国文化的确是博大精深，源远流长，具有悠久的历史和丰富的文化积淀。中国文明的特色之一就是典籍完备，这些经典作品包含了丰富的哲学思想、文学艺术和历史传承，对中国人民的思想观念和价值观念产生了深远影响。中国作为世界范围内最杰出的“文献之邦”，在保存和传承文化遗产方面也展现了非凡的贡献。因此，我们应当倍加珍惜和传承中国传统文化，让其继续发扬光大，为世界文明的发展做出更大的贡献。	根据综合上述材料并结合所学知识，我认为郑氏兄弟的观点比较片面。他们认为中国文献较为重要，但并未充分考虑到文献的缺点。中国文献的确具有延续性强，保存较完备，文脉清晰，同时也具有独特的本国特色。然而，中国文献也存在一些不合理之处，比如重视实用而轻理论，封建思想的束缚也会影响人性的发展。因此，我们在评价中国文献时，需要全面地看待其优点和缺点，才能更好地认识和理解其中蕴含的价值。	tie	b	郑氏兄弟，即郑鹤声和郑鹤春，他们在20世纪30年代编撰的《中国文献学概要》中提出了中国是世界范围内最为杰出的“文献之邦”的观点。综合上述材料和所学知识，我对郑氏兄弟的观点有以下几点认识： 1. 中国古代文献的丰富性：中国古代文献的确非常丰富，涵盖了广泛的领域，从哲学、历史、文学到科学、技术等。材料中提到的《中国古籍总目》中有177,107种文献，这只是冰山一角，实际上中国古代文献的数量远远超过这个数字。 2. 中国文献的连续性和传承性：中国文献的发展没有明显的中断和低潮期，尽管历经灾荒、改朝换代以及外族的入侵，文献传统能够一次又一次地得到恢复。这表明中国社会对文献的重视和对文化传承的坚持。 3. 儒家思想对文献的影响：儒家思想的核心是整顿衰弊的现实世界并恢复远古黄金世界的辉煌，这使得阐释经典成为思想文化最根本的建设手段。这种思想文化的特点促进了文献的积累和传承。 4. 中国文献的独特性：…	根据材料和所学知识，我认为郑氏兄弟的观点指出了中国古代文献传统的历史独特性，强调了中国作为“文献之邦”的地位。他们认为中国文化在典籍方面十分完备，世界各国难以媲美。这一观点在一定程度上得到了支持，因为中国古代确实有着丰富的文献资源，其文献传统历史悠久，保留完整。与欧洲相比，中国在古代就已经形成了印刷书籍和图书业，且在经历过灾难和外族入侵后，文献传统仍能得以恢复。此外，中国的儒家思想也对文献的传承和发展起到了重要作用。 然而，需要注意的是，虽然中国古代文献传统的确十分丰富，但并非没有缺陷。例如，在清中期之前，整个明代出版书籍数量并不算多，与欧洲相比也有所不及。此外，在欧洲，印刷术的推广促进了知识的广泛传播，而中国的文献传统更侧重于典籍的传承和思想的传播。因此，郑氏兄弟观点中的“文献之邦”之说虽有一定道理，但也需要在全面了解中国文献传统的基础上进行评估。 综上所述，我认为郑氏兄弟的观点体现了…	a	a	stud_a	a	a	a	others
嘉祐三年(1058年),在宋神宗的支持下,王安石提出了一整套培养公职人员的办法。首先,他针对学校教育空疏腐败的现实,提出以“尚实用”为原则来培养人才,其教育内容具体来说则包括德行的养成及处理具体政务能力的培养。王安石还建议,在进士考试中,改考查诗赋、贴经和墨义为只考经义和策论。在人才的任用上,他认为应以个人德才的高低为依据,在社会有序分工的基础上实现国家的公共治理功能。他积极推行高薪养廉的制度以遏制腐败,并提出利用礼法相结合的手段来进行保障。两者结合既是减少改革阻力的“托古改制”，也是为了通过礼、乐、刑、政的使用保证国家治理结构有序运行的创新尝试。	根据材料并结合所学知识，概述王安石培养公职人员举措的特点。	特点是强调德才兼备，注重培养实用性人才，内容广泛，形成体系，采用礼法相结合的手段来进行保障。	王安石培养公职人员的举措具有几个特点。首先，他注重实用，重视人员的能力水平。其次，他重视德行的养成，强调个人德才高低。再者，他提倡礼法并用，保证国家治理结构具有全面性。此外，他实行高薪养廉，以防腐败，具有先进性。最后，他采取循循渐进的方式，从根本上改进培养公职人员的制度。	王安石培养公职人员的举措主要体现在三个方面。首先，他非常重视公职人员的德行和处理具体事物的能力，这意味着在选拔和培养公职人员时注重其道德品质和实际工作能力。其次，王安石对公职人员的薪水高，这一举措可以提高公职人员的积极性和工作效率。最后，他重视纪法，提倡公职人员遵守法纪，这样不仅可以规范公职人员的行为，也可以提高社会的教化作用。这些举措共同构成了王安石培养公职人员的特点。	a	a	王安石在嘉祐三年（1058年）提出的一整套培养公职人员的办法，其特点主要体现在以下几个方面： 1. 实用主义教育：王安石主张以“尚实用”为原则来培养人才，强调教育内容应包括德行的养成和处理具体政务能力的培养。这种教育理念强调将学术知识与实际工作相结合，注重培养学生的实践能力和解决实际问题的能力。 2. 改革进士考试：王安石建议在进士考试中，改考查诗赋、贴经和墨义为只考经义和策论。这意味着他更注重考生对经典文献的理解和对国家治理策略的思考能力，而非仅仅考察文学创作和学术论文写作能力。 3. 德才兼备的任用标准：王安石认为在人才的任用上，应以个人德才的高低为依据。这表明他重视公职人员的道德品质和能力，认为只有德才兼备的人才能够在国家治理中发挥重要作用。 4. 社会分工与公共治理：王安石提倡在社会有序分工的基础上实现国家的公共治理功能。这意味着他认为不同的人才应该在不同的岗位上发挥作用，共同构…	王安石培养公职人员的举措具有以下几个特点： 1. 强调实用性：他提出以“尚实用”为原则来培养人才，注重培养学生处理具体政务能力，而不是空泛的书本知识。 2. 注重德行养成：他认为德行的养成同样重要，不仅要培养政务能力，还要注重品德修养。 3. 改革进士考试：他主张改革进士考试内容，只考查经义和策论，而不再涉及诗赋、贴经等内容。 4. 以德才为依据：他认为人才的任用应以个人德才的高低为依据，而不是仅仅看重出身或背景。 5. 推行高薪养廉制度：他积极推行高薪养廉的制度以遏制腐败，通过高薪来吸引人才，同时通过廉洁来保证公职人员的廉洁自律。 6. 利用礼法相结合：他提出利用礼法相结合的手段来进行保障，通过礼、乐、刑、政的使用来保证国家治理结构有序运行。 综上所述，王安石培养公职人员的举措注重实用性、德才兼备、高薪养廉以及礼法相结合，旨在培养具备政务能力和良好品德的人才，为国家的公共治理功能提供支…	b	a	b	b	a	a	what
嘉祐三年(1058年),在宋神宗的支持下,王安石提出了一整套培养公职人员的办法。首先,他针对学校教育空疏腐败的现实,提出以“尚实用”为原则来培养人才,其教育内容具体来说则包括德行的养成及处理具体政务能力的培养。王安石还建议,在进士考试中,改考查诗赋、贴经和墨义为只考经义和策论。在人才的任用上,他认为应以个人德才的高低为依据,在社会有序分工的基础上实现国家的公共治理功能。他积极推行高薪养廉的制度以遏制腐败,并提出利用礼法相结合的手段来进行保障。两者结合既是减少改革阻力的“托古改制”，也是为了通过礼、乐、刑、政的使用保证国家治理结构有序运行的创新尝试。	根据材料并结合所学知识,分析王安石培养公职人员举措的作用。	作用是有利于优秀人才的选拔，为改革的推进和国家治理的完善提供了人才储备，在一定程度上缓解了官员的腐败，净化了官场的风气，促进了科举取士的不断完善，但其本质仍旧是为封建统治服务的，未能突破阶级的局限，并不能从根本上解决北宋的问题。	王安石培养公职人员的举措在以下几个方面发挥了重要作用：首先，防止了学校教育的腐败，确保了人才的良好培养环境；其次，有利于培养人才和政务能力的提升，为国家的公共治理提供了可靠的人才支持，有效遏制了腐败现象的发生；此外，这一举措保证了国家治理结构的有序运行，有利于稳定社会，促进社会和谐发展。因此，王安石的培养公职人员举措对国家和社会的发展起到了积极的推动作用。	王安石培养公职人员举措的作用主要体现在以下几个方面：首先，这有利于促进国家治理结构的完善发展，通过培养高素质的公职人员，可以提升国家治理的水平和效率。其次，这有利于推进廉政建设，保持政治风气清明，培养的公职人员具有高度的政治素养和职业道德，能够有效地维护国家政治清廉。同时，这也有利于提高行政效率和管理水平，培养出的公职人员能够更加高效地履行自己的职责，提升整体管理水平。此外，这有利于引导人民投身于国家治理与建设，激发民众参与国家事务的热情，推动国家的公共治理能力的提升。最后，这有利于推动国家政治发展与完善，培养出的优秀公职人员将成为国家治理的中坚力量，推动国家政治体制不断完善和发展。	a	a	王安石在嘉祐三年提出的一整套培养公职人员的办法，旨在通过改革教育体系和人才选拔机制，提高公职人员的素质和能力，进而促进国家治理的效率和公正性。以下是对王安石培养公职人员举措的作用的分析： 1. 促进教育改革：王安石提出的“尚实用”原则，强调了教育内容应当与实际工作相结合，培养学生的德行和处理具体政务的能力。这有助于提高公职人员的专业素养和实践能力，减少理论与实践脱节的问题。 2. 选拔人才的公正性：王安石建议在进士考试中改考经义和策论，减少诗赋、贴经和墨义等不必要的考核内容，旨在选拔真正具有政治素养和治国能力的官员。这种改革有助于选拔出真正适合公职的优秀人才。 3. 促进廉洁高效的公务员队伍：王安石推行高薪养廉制度，旨在通过高薪来吸引和保留廉洁的官员，减少因贫穷而导致的腐败现象。这种制度有助于建立一个廉洁、高效的公务员队伍。 4. 优化国家治理结构：王安石提出的利用礼法相结合的方法，旨在…	王安石提出的培养公职人员的举措在当时具有一定的积极作用。首先，他提倡以“尚实用”为原则来培养人才，强调德行的养成和具体政务能力的培养，有助于提高官员的素质和能力，从而提升政府的治理水平。其次，改革进士考试内容，只考查经义和策论，有利于选拔出真正具备才华和能力的人才，避免了功利性的文人政治。此外，推行高薪养廉制度和利用礼法相结合的手段来进行保障，有助于遏制腐败现象，提高官员廉洁自律的意识。 然而，王安石的举措也存在一些局限性，比如强调以个人德才的高低为依据可能导致人才选拔过于主观，容易出现偏袒和不公平的情况。此外，礼法相结合的手段在实际操作中可能存在一定的难度，需要谨慎处理，以免过度依赖礼法而忽视实际情况。因此，王安石的举措虽然有其积极作用，但也需要在实践中不断完善和调整。 .	a	b	a	b	a	b	what
19世纪以来,德国现代化道路的最主要特征在于政治与经济的不同步发展,政治长期滞后于经济。到第一次世界大战前夕,当德国在经济上已经发展成为欧洲第一的资本主义工业强国时,政治上却仍然是传统容克阶级占主导地位,资产阶级只是通过没有实权的帝国议会在“参与”意义上加入了统治阶级行列。追根寻源，19世纪以来德国政治发展的相对滞后性固然是多种因素综合作用的结果,诸如专制主义、军国主义等历史传统的影响等。但从德国政治现代化进程的角度出发,统治阶级适时而进的“防御性”政治策略对德国政治发展的这种独特性有不可替代的巨大影响。所谓统治阶级适时而进的“防御性”策略,是指统治阶级在历史发展潮流和革命“威胁”面前,能够“先发制人”,主动顺应历史潮流和满足某些“革命”要求，进而达到驾驭时局和最大限度地保障自己利益的目的。在这种政治策略下相伴而来的必然是政治上相对保守和滞后的色彩。	根据材料一并结合所学知识，指出德意志政治现代化的主要特点，并分析其影响。	特点是政治民主化与经济发展不同步，传统容克阶级占主导地位，民主形式徒有其表，专制色彩浓厚，维护君主和贵族阶级利益。其影响是推动和巩固了国家的政治统一，为德国经济发展提供政治保障，为其他国家宪政改革提供借鉴，导致德国专制主义和军国主义色彩浓厚，最终导致了第一次世界大战的爆发。	德意志政治现代化的主要特点包括政治和经济发展不同步，保守和滞后的特征，以及资产阶级无实权。这种现代化的特点导致了德意志政治相对保守和滞后，同时也具有防御性特征。总体而言，这种现代化的特点使得德意志政治在顺应历史潮流的同时，也能够满足部分革命要求。	德意志政治现代化的主要特点是政治与经济的不同步发展，政治长期滞后于经济，传统容克阶级占主导地位但资产阶级无实权，具有相对滞后性，采取“防御性”政治策略。这种情况导致了不利经济的发展，政治上相对保守和滞后的色彩，限制了德国的发展迅度。	a	a	德意志政治现代化的主要特点在于政治与经济的不同步发展，政治长期滞后于经济。19世纪以来，尽管德国经济迅速发展，成为欧洲第一的资本主义工业强国，但政治上仍然是传统容克阶级占主导地位，资产阶级在政治上并没有获得相应的权力，仅在帝国议会中以没有实权的形式参与政治。 这种政治现代化的特点主要是由统治阶级适时而进的“防御性”政治策略所决定。这种策略意味着统治阶级在面对历史发展潮流和革命威胁时，能够采取主动措施，顺应历史潮流并满足某些革命要求，以此来驾驭时局并最大限度地保障自己的利益。这种策略下产生的必然结果是政治上相对保守和滞后的色彩。 这种政治现代化的特点和策略对德意志的政治发展产生了深远的影响。首先，它限制了资产阶级的政治影响力，使得政治体制难以完全反映经济结构的变化。其次，它导致了政治上的不稳定和社会矛盾的积累，这些矛盾最终在第一次世界大战前夕达到高潮，成为战争爆发的重要因素之一。最后，这种…	德意志政治现代化的主要特点是政治与经济的不同步发展，政治长期滞后于经济。在19世纪以来，德国经济已经发展成为欧洲第一的资本主义工业强国，但政治上仍然是传统容克阶级占主导地位，资产阶级只是通过没有实权的帝国议会在“参与”意义上加入了统治阶级行列。统治阶级采取了“防御性”政治策略，即在历史发展潮流和革命“威胁”面前，主动顺应历史潮流和满足某些“革命”要求，以达到驾驭时局和保障自身利益的目的。这种策略导致政治上相对保守和滞后的色彩。 这种政治现代化的特点影响深远。首先，政治滞后于经济发展可能导致社会不稳定，因为统治阶级的保守性可能无法满足民众对政治改革和民主的需求。其次，政治滞后也可能导致政府无法有效应对社会变革和挑战，从而影响国家的发展和竞争力。最后，政治滞后还可能导致统治阶级在面临变革时无法做出及时有效的调整，从而加剧社会矛盾和冲突。	a	b	b	a	a	a	what
材料一19世纪以来,德国现代化道路的最主要特征在于政治与经济的不同步发展,政治长期滞后于经济。到第一次世界大战前夕,当德国在经济上已经发展成为欧洲第一的资本主义工业强国时,政治上却仍然是传统容克阶级占主导地位,资产阶级只是通过没有实权的帝国议会在“参与”意义上加入了统治阶级行列。追根寻源，19世纪以来德国政治发展的相对滞后性固然是多种因素综合作用的结果,诸如专制主义、军国主义等历史传统的影响等。但从德国政治现代化进程的角度出发,统治阶级适时而进的“防御性”政治策略对德国政治发展的这种独特性有不可替代的巨大影响。所谓统治阶级适时而进的“防御性”策略，是指统治阶级在历史发展潮流和革命“威胁”面前,能够“先发制人”,主动顺应历史潮流和满足某些“革命”要求,进而达到驾驭时局和最大限度地保障自己利益的目的。在这种政治策略下相伴而来的必然是政治上相对保守和滞后的色彩。摘编自邢来顺《论德国政治现代化初…	根据材料一、二并结合所学知识，分析清末宪政改革模板最终放弃德国选择日本的原因，并谈谈你对清末宪政的认识。（13分)	原因是清政府统治危机严重，日本宪政更利于维护皇权统治，中日文化同源性及对诸多实际困难的考量，近代以来中国历史演进的必然结果和倾日官吏的推动。认识是清末宪政改革的根本目的是维护清王朝的封建统治，实质上是一场骗局，清末宪政并没有缓和国内矛盾，反而促使一部分立宪派倒向革命，加速了清王朝的灭亡，客观上促进了中国政治近代化的进程。	清末宪政改革模板最终放弃德国选择日本的原因有几个。首先，日本的宪政实际与清朝政府统治相吻合，这使得学习起来更加顺利。其次，德国在文化本质上属于西方的文明，与中国的文化并不相合。再者，日本和中国彼此文化相近，学习日本宪政情理易通。最后，选择日本与晚清变革同步，是历史逻辑演化的渐进过程。 就清末宪政改革本身而言，我认为其是清政府晚期学习西方改革为维护统治的一种尝试。但其本质是维护封建专制制度，具有局限性。虽然改革了本国宪政，学习了西方先进技术，推动了社会近代化发展，但最终却无法真正改变中国的政治体制。总的来说，清末宪政改革顺应了历史潮流，是社会发展导致的必然结果。	清末宪政改革模板最终放弃德国选择日本的原因有几个方面。首先，日本学习德国并不能从本质上解决问题，因为学谁都于事无补。其次，日本的宪政体制和清朝政体相似，更容易理解和学习。再者，中日文化相通、相近，方便学习交流；而中德文化差异较大，学习起来更困难。此外，日本国力逐渐上升，成为了一个更具有吸引力的学习对象。 对于清末宪政改革，我认为是封建王朝的自救行动，但却没有顺应历史发展潮流。整个改革过程符合历史逻辑的渐进过程，但最终却因为各种原因未能成功实现。宪政改革是一次尝试，也是一次失败，但它为中国的现代化进程奠定了一定的基础，为后来的变革留下了经验教训。	a	a	根据材料一和二的分析，以及结合所学知识，我们可以看出清末宪政改革最终放弃了德国而选择日本的原因在于文化和历史的相似性，以及对日本宪政的认同。 首先，材料二指出，日本和中国在文化上有着较为相近的特点，两国都属于“同州同种同文之国”，这使得中国人更容易理解和接受日本的宪政模式。相比之下，德国的政治文化和制度虽然在当时是世界上最先进的，但它属于西方的异质文明，对中国来说可能更难以接受和模仿。 其次，材料二还提到，日本的宪政实践在清末时期被认为是“尊君权而固民志”，这与清朝的政治统治方式有着较好的吻合性。因此，清政府在考虑宪政改革时，可能更倾向于选择一个与自己现有政治文化和制度更为接近的模板。 此外，日本的明治宪法在当时被认为是先进的宪法之一，它的制定过程和内容都受到德国的影响，但日本将这些德国的成就与自己的传统和文化结合起来，形成了一种独特的宪政模式。这种模式在清末时期被视为一个可行的改革路径…	根据材料一、二以及所学知识，清末宪政改革模板最终放弃德国选择日本的原因主要有以下几点。首先，日本在政治上对中国更具有吸引力，因为两国文化更为相近，学习日本宪政更为容易，书籍易得、文字易译、语意易懂、情理易通。其次，日本在近期取得的成就也让清政府对其政治改革经验更加羡慕，清朝官员普遍认为日本和中国分属“同州同种同文之国”，因此更倾向于模仿日本的宪政制度。另外，日本在明治维新后迅速崛起，展现出了较为成功的现代化道路，这也是清政府选择日本的重要原因之一。最后，日本在日俄战争后提出的“尊君权而固民志”的政治理念也与清朝政统“适相吻合”，因此清政府更愿意学习日本的宪政实践。 至于对清末宪政的认识，我认为清末宪政改革是清政府在外部压力和内部动荡的情况下，试图改革现行政治体制以实现国家现代化的一次尝试。然而，由于历史传统、社会结构的限制以及外部势力的干涉，清朝宪政改革并没有取得预期的成功。虽然清政府选…	a	a	a	a	a	a	why
1984年10月，十二届三中全会阐明了加快以城市为重点经济体制改革的必要性，规定了改革的任务和各项基本政策。从1985年起,以城市为重点的整个经济体制改革全面展开。增强企业活力是城市经济体制改革的中心环节。国家按照政企分开、所有权和经营权适当分离的原则,改革企业经营方式,使企业开始成为相对独立的经济实体。小型全民所有制企业可以租给集体和劳动者个人经营,逐渐形成以公有制为主体、多种经济成分共同发展的所有制结构。到1987年,全国已有80%的国营企业实行各种形式的承包责任制从而把经济体制改革推广到全国。我国城市经济体制改革的全面展开，为国民经济的发展注入新的生机和活力，使国民经济走上持续发展的道路。	根据材料并结合所学知识，说明我国城市经济体制改革全面展开的背景。	背景是十二届三中全会召开，农村经济体制改革成效显著，城市经济体制改革试点的成功，企业缺乏生机和活力。	我国城市经济体制改革全面展开的背景主要有以下几个方面：国家经济建设的需要，改革开放进行火热，十二届三中全会的召开以及国营企业占据主导地位。在这些背景下，我国开始了城市经济体制改革，以适应经济发展的需要，推动经济结构的优化和城市经济的健康发展。	我国城市经济体制改革全面展开的背景主要包括：改革开放不断深化，农村家庭联产承包责任制的实行，中共十二大的顺利召开，以及经济全球化不断加强。这些因素共同推动了我国城市经济体制改革的全面展开。	b	a	我国城市经济体制改革全面展开的背景是1984年十二届三中全会的召开，该会议阐明了加快以城市为重点的经济体制改革的必要性，并规定了改革的任务和基本政策。全会强调了增强企业活力作为城市经济体制改革的中心环节，旨在通过政企分开、所有权和经营权适当分离的原则，改革企业经营方式，使企业成为相对独立的经济实体。 此外，全会还允许小型全民所有制企业可以租给集体和劳动者个人经营，推动了所有制结构的多元化发展，使公有制成为主体，同时鼓励多种经济成分共同发展。到1987年，全国80%的国营企业实行了各种形式的承包责任制，这一举措有效地将经济体制改革推广到全国各地。 城市经济体制改革的全面展开，为国民经济注入了新的活力和生机，促进了国民经济的持续发展。通过改革，企业的独立性和市场竞争能力得到了提升，经济体制更加灵活多样，适应了市场经济的发展需求。	根据材料和所学知识，我国城市经济体制改革全面展开的背景主要包括以下几个方面： 首先，十二届三中全会在1984年10月阐明了加快以城市为重点经济体制改革的必要性，规定了改革的任务和基本政策。这一重要会议的召开为城市经济体制改革奠定了基础。 其次，国家开始按照政企分开、所有权和经营权适当分离的原则改革企业经营方式，使企业开始成为相对独立的经济实体。这一举措增强了企业活力，为城市经济体制改革提供了机遇。 此外，1987年全国已有80%的国营企业实行各种形式的承包责任制，逐步推广经济体制改革到全国范围。这一举措为城市经济体制改革的全面展开提供了实践基础和经验积累。 综上所述，我国城市经济体制改革全面展开的背景是在国家高层会议的部署下，逐步深化改革，增强企业活力，推广各种形式的承包责任制，为国民经济的发展注入新的生机和活力，使国民经济走上持续发展的道路。 。	tie	b	b	b	b	b	what
1984年10月，十二届三中全会阐明了加快以城市为重点经济体制改革的必要性，规定了改革的任务和各项基本政策。从1985年起,以城市为重点的整个经济体制改革全面展开。增强企业活力是城市经济体制改革的中心环节。国家按照政企分开、所有权和经营权适当分离的原则,改革企业经营方式,使企业开始成为相对独立的经济实体。小型全民所有制企业可以租给集体和劳动者个人经营,逐渐形成以公有制为主体、多种经济成分共同发展的所有制结构。到1987年,全国已有80%的国营企业实行各种形式的承包责任制从而把经济体制改革推广到全国。我国城市经济体制改革的全面展开，为国民经济的发展注入新的生机和活力，使国民经济走上持续发展的道路。	根据材料并结合所学知识，说明我国城市经济体制改革全面展开的意义。	意义在于冲破了长期僵化的计划经济体制，扩大了企业经营自主权，增强了企业的活力，调动了广大工人的积极性，提高了企业的经济效益，使国民经济走上了持续发展的道路。	我国城市经济体制改革全面展开具有重要意义。首先，这有利于提高企业经营活力，推动市场经济的发展。其次，这有利于我国经济持续发展，提升城市的经济实力和竞争力。第三，这有利于深化改革开放政策，促进城市经济的国际化和现代化进程。最后，这有利于形成全面经济体制改革，推动城市经济体制的持续优化和完善。	我国城市经济体制改革全面展开具有重要意义。首先，这将推动我国经济的持续发展，为经济发展注入新的生机与活力。其次，适应了经济建设的需要，有助于推动供给侧结构性改革。最后，城市经济体制改革的全面展开也将促进城市化的发展。	a	b	我国城市经济体制改革全面展开的意义在于它推动了企业活力增强，促进了经济体制的多元化和市场化。通过政企分开、所有权和经营权适当分离的原则，企业开始拥有更多的自主权和灵活性，逐渐成为相对独立的经济实体。这一改革措施极大地激发了企业的创新和效率，提高了生产力。 小型全民所有制企业可以租给集体和劳动者个人经营，这一政策不仅扩大了经济参与者的范围，还促进了经济成分的多元发展。这种方式有助于资源的更有效配置和利用，增强了社会的经济活力。 到1987年，全国80%的国营企业实行了承包责任制，这一举措进一步推动了经济体制改革的深入和广泛。承包责任制鼓励企业管理者通过提高效率和创新来增加利润，从而实现了企业利益与国家利益的双赢。 城市经济体制改革的全面展开，为国民经济的发展注入了新的生机和活力，使国民经济走上持续发展的道路。改革的成功为中国经济的快速增长和社会的稳定发展奠定了基础。	我国城市经济体制改革全面展开的意义在于为国民经济的发展注入新的生机和活力。通过改革，企业开始成为相对独立的经济实体，增强了企业活力，促进了生产效率的提高。此外，改革使得小型全民所有制企业可以租给集体和劳动者个人经营，逐渐形成了以公有制为主体、多种经济成分共同发展的所有制结构，进一步激发了市场活力。通过承包责任制的实施，促进了国有企业的改革和发展，推动了经济体制改革向全国的推广。综合来看，城市经济体制改革的全面展开为我国国民经济的持续发展奠定了基础，使得经济走上了更加稳健的发展道路。 。	a	b	b	a	b	b	why
沈约（公元 441 年一公元 513 年），孤贫，笃志好学，昼夜不释卷。母恐其以劳生疾，常遣减油灭火。而昼之所读,夜辄诵之,遂博通群籍,善属文。沈约在兼采众家关于《宋书》编纂成就的基础上,制成新史。他删改因本朝人写本朝事而造成的曲笔讳饰;在史料的取舍上趋于客观,力求对于刘宋历史的撰写达于“实录”;同时补撰了自永光以来14年间的史事,从而使得刘宋一代之史臻于完备。他开创了“因事附见”的编纂方法。此外,沈约还在《宋书》之中,灌注了他对门阀士族与寒门庶族地位升降、佛教在南朝的传播与儒家伦理之间的张力、南北民族矛盾与融合等现实问题的深沉思考。	根据材料并结合所学知识,分析沈约从事史学研究的时代背景。	背景是政权更迭频繁，门阀政治盛行，寒门庶族与门阀士族相斗争，佛道兴起冲击传统儒学，江南地区得到开发，民族融合进程加快。	沈约从事史学研究的时代背景是在宋朝，这个时期有几个重要的特点。首先，宋朝重视文学而轻视军事，这种风气使得史学研究在当时备受重视。其次，科举制度逐渐完善，这导致门阀士族地位下降，为更多的人参与历史研究创造了机会。此外，佛教、道教对儒学的冲击和机遇也在当时存在，这为历史学家提供了更多的研究视角。最后，南北民族导致了冲突与融合，这种复杂的局面也促使历史学家深入研究，以更好地理解时代的变迁和发展。因此，沈约从事史学研究的时代背景复杂多样，为他的研究提供了丰富的素材和背景。	沈约从事史学研究的时代背景是社会政治专制统治下，人民生活较为压迫。同时，史书的整理并不合理，缺乏系统性和科学性。社会思想也比较落后，主要受到儒家思想的影响。此外，南北民族矛盾在这一时期也有所发展。这些因素共同构成了沈约从事史学研究的重要背景。	a	b	沈约从事史学研究的时代背景可以从以下几个方面来分析： 1. **政治环境**：沈约生活的时期，南北朝时期正处于分裂与动荡的时期，政治局势复杂，各地政权频繁更迭。这种政治环境促使人们对于历史的记载和研究有了更深的需求，以期通过历史的学习能够更好地理解当前的政治现状，寻找治国理政的方法。 2. **文化发展**：南朝时期，文化得到了较为繁荣的发展，尤其是文学和学术领域。沈约作为一个好学且笃志的人，在这样的文化氛围中能够不断学习和研究，形成自己的学术观点。 3. **社会变迁**：南北朝时期，社会结构发生了变化，门阀士族与寒门庶族的地位差异日益显著，这种社会矛盾是沈约在《宋书》中深刻分析和反映的对象之一。 4. **宗教信仰**：佛教在南朝得到了广泛的传播，南北朝时期，佛教与儒家伦理之间的关系也逐渐明朗化，这也是沈约在《宋书》中探讨的重要议题之一。 5. **史学传统**：沈约在编纂《宋书》时…	沈约从事史学研究的时代背景是南北朝时期，这个时期是中国历史上一个政治动荡、文化交融的时期。在南北朝时期，中国分裂为南北两个政权，南朝以刘宋为代表，北朝则是由北魏等国家组成。这个时期社会经济动荡，战乱频繁，人民生活困苦，文化传承也受到了一定程度的影响。 沈约在这样的时代背景下，通过编纂《宋书》等著作，力求对刘宋历史进行客观、实录式的撰写，避免了曲笔讳饰，补充了14年间的史事，使得刘宋一代历史得以完备记录。他开创了“因事附见”的编纂方法，同时也在作品中融入了对当时社会现实问题的深刻思考，如门阀士族与寒门庶族地位升降、佛教与儒家伦理的关系、南北民族矛盾与融合等。 这些都反映了南北朝时期的社会背景，即政治动荡、文化交融、社会变革的特点。沈约通过他的史学研究，为后人提供了重要的历史资料，也反映了当时人们对于历史、文化、社会问题的关注和思考。 。	a	b	a	a	b	b	what
沈约（公元 441 年一公元 513 年），孤贫，笃志好学，昼夜不释卷。母恐其以劳生疾，常遣减油灭火。而昼之所读,夜辄诵之,遂博通群籍,善属文。沈约在兼采众家关于《宋书》编纂成就的基础上,制成新史。他删改因本朝人写本朝事而造成的曲笔讳饰;在史料的取舍上趋于客观,力求对于刘宋历史的撰写达于“实录”;同时补撰了自永光以来14年间的史事,从而使得刘宋一代之史臻于完备。他开创了“因事附见”的编纂方法。此外,沈约还在《宋书》之中,灌注了他对门阀士族与寒门庶族地位升降、佛教在南朝的传播与儒家伦理之间的张力、南北民族矛盾与融合等现实问题的深沉思考。	根据材料并结合所学知识，概括沈约在史学领域的成就。	成就是秉笔直书本朝人物，客观取舍史料，补录完备宋史，开创新的编纂方法，丰富《宋书》内容。	沈约在史学领域取得了多方面的成就。他在《宋书》的基础上编制案史，并删改了与历史不符的曲笔讳饰，以求客观取舍史料，实现了对刻定历史的撰写。他开创了因事附见的编纂方法，补撰史事，使刘宋一代之史达到了兴备的水平。	沈约在史学领域的成就包括：在兼采众家关于《宋学》的基础上制成新史，在史料的取舍上趋于客观，讲求关际，使史完备，并在《宋书》中加入了许多现实问题。他还开创了“因事附见”的偏纂方法。	b	a	沈约在史学领域的成就主要体现在以下几个方面： 1. **客观史料取舍与史实记录**：沈约在编纂《宋书》时，力求史料的取舍更加客观，删改了因本朝人写本朝事而造成的曲笔讳饰，努力使史书内容更接近“实录”，为后世研究刘宋历史提供了较为准确的资料。 2. **编纂方法创新**：沈约开创了“因事附见”的编纂方法，这种方法在史书编纂中较为新颖，能够更好地反映历史事件与人物之间的关联性和发展脉络。 3. **深入探讨社会现实问题**：在《宋书》中，沈约不仅记录了历史事实，还深入探讨了当时社会的多重矛盾和问题，如门阀士族与寒门庶族的地位变化、佛教在南朝的传播与儒家伦理之间的张力、南北民族的矛盾与融合等。这些内容不仅丰富了史书的内容，也为研究历史社会提供了深刻的洞察。 4. **史书内容的完备性**：沈约不仅在编纂基础上做出了贡献，还补撰了自永光以来14年间的史事，使得《宋书》内容更加完备，全面记录了刘宋…	沈约在史学领域的成就主要体现在他在《宋书》编纂过程中的创新和贡献上。首先，他采取了兼采众家之法，对《宋书》进行了删改，力求客观地还原刘宋历史，使得史料取舍更加准确。其次，他补撰了14年间的史事，使得刘宋一代的历史得以完备呈现。此外，沈约开创了“因事附见”的编纂方法，使得史书更具有丰富的内容和深刻的思考。他在《宋书》中还探讨了门阀士族与寒门庶族地位、佛教传播与儒家伦理张力、南北民族矛盾与融合等现实问题，展现了他对历史和社会的深刻思考和洞察力。 。	a	b	a	a	a	a	what
1935~1937 年美国国会通过的三个《中立法》，是 30 年代美国国内孤立主义占上风和国际上美英矛盾突出的反映,是美国版的绥靖主义。但是,面对德国法西斯日益增长的威胁,美国总统罗斯福的对外政策逐渐向英法倾斜。1939年3月17日,即德国吞并捷克后两天,他明确对报界表示,过去几天内欧洲事态的发展表明,美国需要修改《中立法》。这些条款对于美国的中立、美国的安全,尤其是美国的和平具有致命的极大危险。参众两院通过《新中立法》,解除对交战国军火禁运,但需“现金购买,运输自理”。1939年《中立法》表明美国对欧政策有所调整,从偏袒德、意转为偏袒英、法。但是美国对欧政策的调整又是有限度的,没有突破美国长期以来中立政策的框架,束缚了给英法以更有力的援助。摘编自《从<中立法>到<租借法>看美国在二战中的态度转变》	根据材料并结合所学知识，概述美国修改《中立法》的原因。	原因是德国法西斯对美国的威胁日益增长，废除武器禁运能更好地保证美国的安全，扩大美国就业机会。	美国修改《中立法》的原因主要有三点。首先，美国孤立主义的推动使得美国政府意识到需要修改法律以适应当时的国际形势。其次，美英矛盾的加剧使得美国感受到了更大的外部压力，需要作出相应的调整。最后，德国法西斯的威胁让美国意识到需要采取更加主动的立场来应对国际局势的变化。这三点因素共同促使美国修改《中立法》，以更好地适应当时的国际形势。	美国修改《中立法》的原因主要有以下几点：一是美国国内孤立主义盛行，使得政府需要更灵活的政策来适应国际形势；二是国际上美英矛盾突出，需要美国采取更主动的立场来维护自身利益；三是德国法西斯日益增长的威胁，使得美国需要更积极地参与国际事务以维护世界和平与秩序；四是德国吞并了捷克，使得美国认识到必须采取行动来遏制法西斯势力的扩张。这些因素共同促使美国修改《中立法》，以更好地适应当时的国际形势。	a	a	美国在1939年修改《中立法》的原因主要是由于对德国法西斯日益增长的威胁以及对英法的倾斜。随着欧洲局势的紧张，美国总统罗斯福认识到现行《中立法》的条款对于美国的中立、安全和和平构成了巨大的威胁。这些法规限制了美国对交战国的军火出口，导致美国无法有效地提供对抗纳粹德国的支持。 罗斯福总统在1939年3月17日对媒体表示，欧洲事态的发展表明美国需要修改《中立法》以适应新的国际形势。因此，美国通过了新的《中立法》，允许对交战国销售军火，但必须以现金支付，并由购买国自行运输。这一调整表明美国的对欧政策从偏袒德意转向偏袒英法，但这种调整仍然保持在不破坏美国长期中立政策框架的范围内。因此，这一政策调整虽然有所松动，但仍然限制了美国能够给英法提供更为有力的援助。 总之，美国修改《中立法》的原因在于对德国的威胁的担忧以及对英法的支持，目的是在不完全放弃中立政策的前提下，提供更多的外交和经济援助，以期在不…	美国修改《中立法》的主要原因是面对德国法西斯日益增长的威胁，以及1939年3月17日德国吞并捷克后的事态发展。这些事件使得美国总统罗斯福意识到《中立法》对美国的中立、安全以及和平构成了致命的危险，因此需要进行调整。通过修改《中立法》，美国可以解除对交战国军火的禁运，从而有可能向英国和法国提供更多有力的援助，使得美国的对外政策逐渐向英法倾斜。因此，美国修改《中立法》的目的是为了更好地应对当时的国际形势，确保美国的国家利益和安全。。	a	a	a	a	a	a	why
1935~1937 年美国国会通过的三个《中立法》，是 30 年代美国国内孤立主义占上风和国际上美英矛盾突出的反映,是美国版的绥靖主义。但是,面对德国法西斯日益增长的威胁,美国总统罗斯福的对外政策逐渐向英法倾斜。1939年3月17日,即德国吞并捷克后两天,他明确对报界表示,过去几天内欧洲事态的发展表明,美国需要修改《中立法》。这些条款对于美国的中立、美国的安全,尤其是美国的和平具有致命的极大危险。参众两院通过《新中立法》,解除对交战国军火禁运,但需“现金购买,运输自理”。1939年《中立法》表明美国对欧政策有所调整,从偏袒德、意转为偏袒英、法。但是美国对欧政策的调整又是有限度的,没有突破美国长期以来中立政策的框架,束缚了给英法以更有力的援助。摘编自《从<中立法>到<租借法>看美国在二战中的态度转变》	根据材料并结合所学知识，简述美国新《中立法》的影响。	影响是支援了英法等国，对反法西斯战争的胜利起了重要作用，美国大发战争财，推迟战火蔓延至美国，保全了美国人民的安全，加强了美国战后称霸的实力地位。	新《中立法》的出台对美国产生了深远影响。首先，该法案确立了美国的中立地位，保证了美国在国际事务中的中立性。其次，新《中立法》为美国军事销售提供了安全的国际环境，有利于美国军事力量的发展和壮大。然而，该法案也助推了法西斯的扩张，导致二战的爆发。最终，新《中立法》为美国从二战中获利提供了便利，为美国在战后的国际地位奠定了基础。	根据材料并结合所学知识，新《中立法》对美国的影响是复杂的。该法律有利于缓和美国存在的各种矛盾，并在一定程度上促进了美国的经济发展。然而，它也存在一些不利之处。首先，新《中立法》没有突破长期以来中立政策框架，可能导致美国在国际事务中的作用受限。其次，该法律束缚了美国向英国和法国等盟友提供更有力的援助，可能影响美国与这些国家的关系。综合来看，新《中立法》对美国的影响是双重的，既有利也有不利之处。	a	b	美国新《中立法》的影响主要体现在以下几个方面： 1. 法律上的调整：新《中立法》解除了对交战国的军火禁运，但要求“现金购买，运输自理”。这意味着美国允许向英国和法国出售军火，但必须以现金支付，并由购买国自行安排运输。这一调整在一定程度上缓解了英法的军事压力，但同时也限制了他们的购买能力，因为他们需要在战争中分配有限的资源来支付军火。 2. 政策上的调整：通过新《中立法》，美国对欧洲政策有所调整，从偏袒德意转向偏袒英法。这体现在美国开始更多地向英国和法国提供军事援助，尽管这种援助仍然受到一定的限制。这种调整反映了美国总统罗斯福对德国法西斯日益增长威胁的担忧，以及他对英法的支持。 3. 安全和和平的影响：新《中立法》对于美国的安全和和平具有重要意义。虽然它没有完全打破美国长期以来中立政策的框架，但通过提供一定程度的军事援助，帮助了抗击纳粹德国的盟国。这在一定程度上有助于维护美国的长远利益，并…	美国新《中立法》的影响主要体现在以下几个方面： 1. 解除了对交战国军火的禁运，允许他们用现金购买并自行运输军火。这一举措实质上是对英法的支持，使得他们能够更容易地获取美国的军火援助，增强了他们在与德国法西斯的战争中的实力。 2. 美国对欧政策的调整，从偏袒德、意转为偏袒英、法，显示了美国政府对国际形势的认识和态度的转变。这使得美国更加倾向于支持英法一方，对德国的威胁采取更加积极的态度。 3. 新《中立法》的通过标志着美国在对外政策上的调整，从孤立主义向国际主义的转变。这为后来美国更加积极参与第二次世界大战提供了基础，为之后的《租借法》等法案的通过奠定了基础。 综上所述，美国新《中立法》的影响在于加强了对英法的支持，体现了美国对外政策的调整和对国际形势的认识转变，为美国更加积极参与第二次世界大战奠定了基础。	b	a	b	b	a	b	what
隋朝除进士科外,其他如秀才、明经等三科举人不可以随意报考,而是先由地方官员推荐,才能进入中央政府的招考程序。唐朝常科考试包括三个过程:分别为“解试”“省试”“殿试”,其考生来源“由学馆者曰生徒,由州县者曰乡贡”,之后历朝基本延续了这一程序。唐朝的进士科是常科中的龙头老大,它的评价标准事实上左右着其他各科的评价标准。宋朝贡举在报名程序、考生资格限定、考试时间和地点、考场规则、试卷评定等方面,逐步建立起一套比较完备的制度,标志着科举考试的成熟。宋朝在考试规则方面做了进一步革新,如清除公荐流弊,将殿试、别试和锁厅试制度化,实行糊名和誊录制度,知举官实行锁宿制度,明朝统治者甚至通过规范贡院格局来保证考试过程的公平。明朝的会试录取,初不分地区。洪熙元年，仁宗改革会试录取办法，实行分区录取，南人称南卷，北人称北卷。正统年间又分为南、北、中三区录取。	根据材料一并结合所学知识,指出古代中国科举考试维护社会公平正义的表现及其重要意义。(12分)	表现在层层筛选体现选才公正，统一标准维护量才公正，严密规程保证取才公正，按省配额体现录取公正，意义在于科举考试以一种全新的选官方式为封建政府官吏结构的调整开辟了一条新的道路，不以门第、财产作为选才依据，而以考试为主要手段，体现了对制度公正这一价值理念的追求，在尊重平等性的同时尊重差异性，照顾到各地经济文化发展差异，有利于缓和社会矛盾和稳定社会秩序。	古代中国科举考试是一种维护社会公平正义的制度。首先，科举考试分层进行，由政府人员招办，不得随意参考，这样一定程度上避免了官僚主义操纵考试的情况。其次，科举考试的考生来源民间学馆，分层次、等级参加考试，有利于规范社会向学的风气，促进儒学的发展。同时，科举考试相关内容逐渐制度化，设立专门机构规范考试秩序，保证了广大百姓有入仕为官的基本资格。此外，根据地域文化差异制定不同类型试卷，有利于形成正直公平正义的考试风气。总的来说，古代中国科举考试既有利于选拔人才，又有助于维护社会公平正义，对于推动社会进步和稳定有着重要意义。	古代中国科举考试是维护社会公平正义的重要手段之一。在宋朝，科举考试清除了公荐流弊，制度化实行了殿试、别试和锁厅试，同时还实行了糊名和誊录制度，这一举措扩大了生源，使不同地区的人都有机会参加考试。另外，明朝规范了贡院格局，减少了改卷官员看人评卷的现象，使考试结果更加公平。此外，知举官实行锁宿制度，也有利于避免人为干预。这些举措为朝廷选出了更多优秀人才，有利于社会的长治久安。因此，古代中国科举考试在维护社会公平正义方面发挥了重要作用。	a	b	古代中国科举考试在维护社会公平正义方面表现出以下几个方面的重要意义： 1. 公平的选拔机制：科举考试的选拔机制旨在通过考试的方式选拔人才，理论上任何人只要具备相应的知识和能力，都有机会通过考试进入仕途。这种机制打破了封建贵族的世袭特权，提供了平等的机会，让有才华的平民百姓也有可能成为官员。 2. 制度化的考试程序：科举考试制度化的过程中，逐步建立了比较完备的考试规则和程序，如报名程序、考生资格限定、考试时间和地点、考场规则、试卷评定等，这有助于确保考试的公正性和公平性。 3. 考试的透明度和公正性：宋朝的糊名制度和誊录制度，以及明朝的锁宿制度，都有助于减少考官的偏见和不公，提高考试的公正性。这些制度的实施有助于确保每个考生的成绩都是基于其真实的考试表现。 4. 地区的平衡：明朝的分区录取制度，虽然在一定程度上反映了对不同地区的偏好，但也为不同地区的考生提供了平等的机会，避免了某些地区的考…	古代中国科举考试维护社会公平正义的表现主要体现在以下几个方面： 首先，科举考试不分贵贱，只要有才能就有机会考取功名，这打破了封建社会的世卿世禄制度，为人们提供了一个通过个人能力获得官职的途径，从而实现社会的阶层流动。 其次，科举考试实行了一定的考试规则和程序，确保了考试的公正公平。比如宋朝通过建立完备的考试制度来规范考试过程，明朝在会试录取中实行分区录取，避免了地域偏袒现象，确保了各个地区的考生有平等的机会。 另外，科举考试也有助于选拔人才，让优秀的人才得以进入官场，为国家的政治、经济、文化发展做出贡献。通过科举考试选拔出的官员大多具备一定的才干和素质，有利于国家的长治久安。 总的来说，古代中国科举考试维护社会公平正义的重要意义在于打破了封建等级制度，确保了考试的公正公平，以及选拔了优秀人才为国家服务，促进了社会的稳定繁荣。	a	b	a	a	b	a	why
自1881年开始,中国留美幼童开始陆续回国。归国后的学子积极改造中国社会,并以渐进的方式,逐步把近代风气带进政府部门,冲击着封建官僚旧习、尤其是在抵制贪污、求真务实、提高政府行政能力方面效果较为显著,为近代中国政治开创了一个新的局面。1875年赴美留学的梁诚，在晚清交涉赎回兴筑粤汉铁路权益的进程中作出巨大贡献，这件事为辛亥革命的爆发创造了条件。梁诚在美多年,深知美国政治运行模式,因此,他通过多种渠道争取美国各界的支持，请求他们支持中国的庚子退款要求，利用报刊舆论对美国政府和时任美国总统的老罗斯福施压。部分留美幼童又以极大热情投入到民主化的建设潮流中,不断奋斗，不断前进，努力追求民主共和制度的实现。因而，他们对近代中国政治的影响也越来越大。	根据材料一并结合所学知识,指出晚清留美幼童回国后为改造中国而努力的具体表现及对中国政治近代化的作用。(10分)	表现在引进近代风气，维护铁路主权，投身革命实践，作用在于一定程度上冲击了官僚旧习，维护了国家利益，推动了中国外交近代化的进程，促进近代中国政治的民主化。	晚清留美幼童回国后，他们在改造中国的努力中展现出了多种具体表现。首先，他们把近代风气带入政治部门，促使政府各方面发生变化。其次，例如梁诚成功赎回铁路权益和推动庚子退款要求进程，为中国政治近代化起到了重要作用。此外，部分人员还投入民主化建设中，为中国社会的近代化进程做出了贡献。 这些行为不仅为辛亥革命奠定了基础，也促进了中国社会的近代化。他们努力打造政廉氛围，为中国政治的现代化发展提供了支持。通过这些努力，晚清留美幼童为改造中国政治近代化作出了重要贡献。	表现：①把近代风气带进政府部门，冲击封建旧习 ②抵制贪污，提高政府行政能力 ③捍卫国家主权，抵抗不平等 ④努力造成民主共和制，加入民主化建设作用：①推动中国政治近代化发展	a	a	晚清留美幼童回国后为改造中国而努力的具体表现主要体现在以下几个方面： 1. 抵制贪污：留美幼童们受到了西方民主和法治的影响，强烈反对中国的贪污腐败现象。他们在政府部门推动了透明度和公正性的提高，努力建立一个更加公平的社会环境。 2. 求真务实：留美幼童们在学术和工作中强调实践与理论相结合，推动了中国的行政改革，提高了政府的行政效率和服务质量。 3. 推广近代风气：他们通过教育、文化和媒体等多种渠道，推广了西方的现代思想和价值观，促进了中国社会的现代化进程。 4. 参与政治活动：留美幼童们对民主共和制度有着深刻的理解，他们积极参与政治活动，推动了中国政治体制的改革，尤其是在辛亥革命前后，他们的活动为革命的爆发创造了条件。 例如，梁诚在晚清时期的活动就体现了留美幼童对中国政治的积极影响。他利用在美国的政治经验和人脉，成功地争取到了美国的支持，帮助中国在庚子赔款问题上取得了胜利，这对于晚清政府…	晚清留美幼童回国后为改造中国而努力的具体表现包括积极参与政府部门工作，推动政府部门的改革和现代化；抵制贪污现象，提倡求真务实的工作态度；提高政府行政能力，推动政府效率的提升。举例来说，梁诚在晚清时期就通过争取美国各界支持、利用报刊舆论施压等方式，为中国争取利益，推动了辛亥革命的爆发条件。此外，部分留美幼童也投入民主化建设潮流中，努力追求民主共和制度的实现，为中国政治近代化开创了新局面。 这些留美幼童通过自身的努力和影响，推动了中国政治的现代化进程，对近代中国政治起到了重要的作用。 。	b	a	b	a	a	a	what
1950 年，我国与波兰、捷克等 5 个东欧国家交换 25 名留学生，学习语言、历史等科目。从1951年起,为了适应国家经济建设的需要,新中国开始正式较大规模地向苏联派出留学生,用以发展重工业所需要的工程技术人才。改革开放后派出的留学生的年龄主要集中在36~45岁之间,并对留学生的资格作了严格的规定,在选拔程序上则需经派出单位初选、全国外语统考、省级高教行政部门复审、教育部监察等四道关。1981年开放自费留学政策后,越来越多的人走出国门。留学人员对留学国别的选择呈现多元化的选择趋向，人们的留学热情空前高涨,留学成为牵动老百姓日常生活的社会热点,留学的动机也不仅仅是求学为第一,而是有了更多个人功利的考虑。进入21世纪,随着中国国力的增强,在中国出国留学生数量不断增长的同时，另一个人潮开始涌现，这就是“海归”潮。	根据材料二并结合所学知识，指出新中国留学教育的变迁并分析其原因。	变迁表现为由新中国成立初期的留学苏联与东欧社会主义国家到改革开放后留学国别的多元化，由国家公费派出精英转向普通百姓自费留学与公费并存局面，由新中国成立初期国家经济建设需要的专门人才留学到改革开放后更多为了提升个人而留学，由改革开放后的留学生走出国门定居国外到21世纪海归时代的到来，原因在于新中国成立初期受意识形态的影响，新中国经济恢复和发展的需要，改革开放后人民生活水平的提高及对教育的重视，国家留学政策的推动，21世纪中国综合国力的增强。	新中国留学教育经历了一系列变迁。首先，从最初适应国家经济建设需要、以求学为第一的动机，逐渐转变为更多个人功利考虑的留学动机。这一变化可以解释为随着国家经济发展和社会进步，人们对留学的需求也发生了变化，不仅仅是为了国家建设，更多的是为了个人发展和提升。 其次，留学人员对留学国别的选择呈现出多元化的趋势。这表明人们对留学目的地的选择更加灵活多样，不再局限于特定国家或地区。这种变化可能与全球化的发展、国际交流的增加有关，人们有更多的选择余地，可以根据自己的兴趣、专业需求等因素来选择留学国家。 总的来说，新中国留学教育的变迁是一个与时代发展和社会变革密切相关的过程。随着国家和社会的发展，留学教育的目标、动机和选择都发生了一定的改变，这也反映了人们对教育和未来发展的不断追求和探索。	根据材料二及所学知识，新中国的留学教育经历了明显的变迁。过去，我国向他国输送留学生时具有较强的目的性，这主要是为了借鉴外国的先进经验和技术，推动国内的现代化建设。而在派送留学生时，我国也需要考虑到很高的政治意识，确保留学生能够正确传达国家的政治立场和主张。 这种变迁的原因主要是随着时代的发展和国家整体实力的增强，我国对留学教育的战略定位和需求也在不断调整。同时，国际关系的复杂性和教育环境的变化也促使我国在选择和培养留学生时更加注重综合素质和国际视野的培养，而不仅仅是技术和知识的输入。 因此，新中国留学教育的变迁是一个符合时代发展和国家需求的过程，也体现了我国在国际教育交流中的不断探索和进步。随着中国在全球舞台上的影响力逐渐增强，留学教育的目标和要求也将继续适应国家发展的需要，为我国的现代化建设和国际交流做出更大的贡献。	a	b	新中国留学教育经历了从初期的国家间交流到后来的个人兴趣驱动的多元化选择的转变。最初，留学主要是为了学习语言和历史等科目，目的是增强国家间的文化交流和理解。在1951年之后，随着国家经济建设的需要，留学的重点转向了工程技术人才的培养，以促进重工业的发展。这一时期，留学的方向和目的更加明确，受国家政策的直接影响。 改革开放后，留学教育的变迁更加显著。随着对外开放的深入，留学不再仅仅是国家间的交流，而是个人兴趣和职业发展的选择。留学生的年龄也从初期的年轻学生转变为更多的成年人，主要集中在36~45岁之间，这反映了人们在职业生涯中对进一步教育和提升的需求。同时，选拔过程也变得更加严格，包括派出单位初选、全国外语统考、省级高教行政部门复审、教育部监察等四道关，这体现了对留学人员素质的严格要求。 1981年开放自费留学政策后，留学教育的多元化选择更加明显。人们不仅仅为了求学，更考虑到个人功利，如提升…	根据材料二，新中国留学教育经历了从向东欧国家派出留学生学习语言、历史等科目，到向苏联派出留学生发展重工业所需工程技术人才，再到改革开放后派出留学生年龄集中在36~45岁之间，留学生资格规定严格，选拔程序繁琐，最后开放自费留学政策，留学人员选择国别多元化，留学热情高涨，留学动机也有功利考虑。这一变迁的原因可以从以下几个方面进行分析： 首先，新中国留学教育的变迁与国家经济建设的需要密切相关。在经济建设不断发展的过程中，新中国需要不同专业的人才来支持国家的工业和技术发展，因此留学生的培养方向也随之调整。 其次，改革开放后，随着国力的增强和对外开放政策的实施，新中国需要更多高素质的人才来支持国家的现代化建设，因此留学政策也相应调整，包括放宽留学资格、增加留学生选择的国别等。 最后，随着社会发展和人们观念的变化，留学不再只是为了求学，更多的人开始考虑到个人发展和利益，这也推动了留学教育的变迁，使得…	b	b	b	b	b	b	why
从20世纪初开始,就有一批仁人志士追求汉字简化,甚至期望实现拼音化,在他们看来,是繁杂的汉字阻碍了中华民族的发展进步。中华人民共和国成立以后,第一次“汉字简化”方案自1956年由国务院颁布正式推行。《汉字简化总表》对汉字的简化方式大致有简化原字、简化偏旁、废除今字保留古字、合并同音字等四种。据统计，原有的繁体字平均每字16画，经过简化之后，平均每字降到10.3画，减少了35%的笔画。在7000个常用字中,有简化字2 235个。简化字约占现代汉语用字的三分之一。《汉字简化总表》的积极作用在于大大地简化了笔画,减少了用字,便于识字,提高了书写速度。实施简化,有利于新中国成立之初大规模的“扫盲”运动。《汉字简化总表》的制定者的主导思想仅仅是把汉字看作是记录符号,追求把每个字的笔画限制在10画以内,所以简化笔画往往顾此失彼。-摘编自杨新生《汉字简化的回溯与思考》	根据材料并结合所学知识，简析新中国“汉字简化”方案出台的原因。	原因在于有识之士的推动，繁杂汉字的弊端，“双百”方针的开展，构建新中国政治认同的需要。	新中国“汉字简化”方案出台的原因主要有以下几点：首先，传统汉字的繁琐复杂阻碍了中华民族的发展进步，需要进行简化以适应现代社会的发展需求。其次，繁体字使人民无法正常学习汉字，影响了教育质量和效率。最后，简化汉字有利于汉字的推广和促进人民教育发展，有利于提高国民素质和文化水平。因此，推出汉字简化方案是为了适应时代的需要，促进汉字的普及和推广，推动人民教育事业的发展。	新中国“汉字简化”方案出台的原因有以下几点：一批仁人志士认为繁体字阻碍了中华民族的进步；汉字简化有利于新中国成立之初大规模的扫盲运动；汉字简化便于识字，提高书写速度，有利于传接知识，满足人们的文化需求。	b	b	新中国“汉字简化”方案出台的原因主要体现在以下几个方面： 1. **促进教育普及和“扫盲”运动**：在新中国成立初期，为了实现国家的教育普及和“扫盲”运动，简化汉字可以帮助减少识字的难度，提高识字率。简化后的汉字减少了笔画，书写更为简单，便于大众学习和使用。 2. **提高书写效率**：繁体汉字的笔画繁多，书写效率低。简化汉字的推行有助于提高书写速度，减少书写时的劳动强度，特别是在当时的通信和文档处理中，这一点尤为重要。 3. **适应现代化需求**：随着社会的发展和现代化进程的加快，需要更快地传播信息和进行文档处理。简化汉字有助于满足这一需求，提高工作效率。 4. **文化传播和国际交流**：简化汉字有助于文化的传播和国际交流。简化后的汉字更易于外国人学习和使用，有利于中国文化的国际传播。 5. **技术发展**：随着印刷技术和信息技术的发展，简化汉字有助于提高印刷和输入效率，减少打字…	新中国“汉字简化”方案出台的原因主要有以下几点：首先，汉字繁体字在一定程度上确实给人们的阅读和书写带来了一定的困难，特别是对于初学者和文盲来说，繁体字的书写速度较慢，识字难度较大。因此，简化汉字可以提高人们的识字和书写效率，有利于扫盲工作的开展。其次，简化汉字也符合当时社会主义建设的需要，简化汉字的推行符合国家的现代化发展需求，有利于提高国民素质和文化水平。最后，简化汉字也是为了推动语言文字的规范化和标准化，方便国家的管理和统一交流。总的来说，新中国“汉字简化”方案的出台是为了适应当时社会的发展需求和国家建设的需要，提高人们的识字效率和推动语言文字的规范化。。	b	b	b	b	b	b	why
从20世纪初开始,就有一批仁人志士追求汉字简化,甚至期望实现拼音化,在他们看来,是繁杂的汉字阻碍了中华民族的发展进步。中华人民共和国成立以后,第一次“汉字简化”方案自1956年由国务院颁布正式推行。《汉字简化总表》对汉字的简化方式大致有简化原字、简化偏旁、废除今字保留古字、合并同音字等四种。据统计，原有的繁体字平均每字16画，经过简化之后，平均每字降到10.3画，减少了35%的笔画。在7000个常用字中,有简化字2 235个。简化字约占现代汉语用字的三分之一。《汉字简化总表》的积极作用在于大大地简化了笔画,减少了用字,便于识字,提高了书写速度。实施简化,有利于新中国成立之初大规模的“扫盲”运动。《汉字简化总表》的制定者的主导思想仅仅是把汉字看作是记录符号,追求把每个字的笔画限制在10画以内,所以简化笔画往往顾此失彼。-摘编自杨新生《汉字简化的回溯与思考》	根据材料并结合所学知识，评价“汉字简化”方案。	评价为汉字简化在一定程度上方便了书写，提高了书写的速度，有利于新中国成立之初大规模的“扫盲”运动的开展，但也在一定程度上破坏了汉字的美感，割裂了与传统的联系。	根据材料并结合所学知识，对“汉字简化”方案进行评价。该方案有利于新中国成立之初大规模扫盲运动，减少了繁琐，有利于汉字的推广，推动全民教育，识字，提高全民素质水平。简化汉字使得汉字没有当初那样具有研究性，但也减少了汉字笔画的美感。	汉字简化方案的好处是让人们学习更加便利，节省写字时间，有利于知识的传播，满足人们的需求。然而，汉字简化的主导思想追求“板简”，导致象形汉字失去了原有的韵味和内涵。从艺术角度来看，简化后的汉字失去了原有的神态美和象形美，造成了美学上的损失。	b	b	"汉字简化"方案是中华人民共和国成立后的一项重要文化改革措施，其主要目的是为了提高书写速度、便于识字和推动教育普及。简化后的汉字确实减少了笔画，平均每字从原有的16画降低到10.3画，减少了35%的笔画，这在一定程度上达到了简化的初衷。 简化字的推行有利于新中国成立之初的大规模“扫盲”运动，帮助提高了公众的文化素质和教育水平。同时，简化字也便于现代化的快速发展，特别是在信息时代，简化字在打字机、计算机输入等方面更为方便。 然而，简化字的制定过程和结果也存在争议。材料中提到，简化字的制定者在追求简化的过程中可能忽视了字形的美观性和文化内涵，导致了一些字形的失真。简化过程中，可能会忽略字形的历史和文化价值，导致一些字形的变化不够谨慎。 此外，简化字的普及也引起了一些仁人志士的反对，他们认为汉字的拼音化是更彻底的解决方案。然而，汉字的拼音化会丧失汉字的书面文化和美学价值，因此在推广简化字时，需…	根据杨新生的观点以及所学知识，可以看出汉字简化方案在一定程度上确实简化了汉字的笔画，提高了识字速度，有利于扫盲运动等方面。然而，简化过程中可能会导致一些字形和意义的混淆，造成阅读理解的困难。简化之后的汉字也可能失去了一部分文化内涵和历史意义。此外，简化汉字的过程可能有一定的主观性，导致一些简化并不符合语言规律或者造成不必要的混淆。因此，在评价汉字简化方案时，需要综合考虑简化带来的便利性与文化传承之间的平衡。。	a	tie	tie	a	a	a	others
文彦博，字宽夫，汾州介休人。在宋夏战争兴起后，文彦博发现有贻误战机的旧规，他大胆向皇帝进言:这是平时的规定,现在战时情况多变,应当给前线将领放权,否则将权不集中,军法不严峻。宋仁宗吸取他的意见,宋朝最终取得了这场战争的胜利。文彦博以直史馆的身份任河东转运副使时,继承他父亲的志愿,修复了麟州(今陕西省神木县北)曲折遥远的运粮饷道路，并由此而储备了大量粮饷。当贝州王则起义，朝廷派兵久战未灭时，文彦博主动请求去讨伐，他沉着应战，一面让官军猛攻北城，另一方面在南城挖地道直通城里。最后官军入城，将王则抓捕，起义终于得到了平息。针对宋朝长期面临的冗兵现象，文彦博与同仁商议,计划总计裁省兵员八万人,包括支付原俸禄一半的士兵和将佐。这次裁兵使边境财政矛盾稍有缓和。宋神宗即位后,曾对文彦博说:“虽然是天命,但也靠人谋,您品性深厚,不宣扬自己的善德,阴德如丙吉,真是定策的大臣,是国家的依靠。”文彦博则回答:…	根据材料并结合所学知识，指出文彦博所作的贡献。	贡献在于在宋夏战争中纠正了贻误战机的旧规并取得战争胜利，修复运粮饷道路，为政府储备了大量粮饷，平定贝州王则起义，实行“精兵简政”，节省了国家大量的军费开支，减轻了民众负担。	文彦博在历史上的贡献主要体现在几个方面。首先，他大胆进谏，获得将前线将领放权的机会，使军队实力得到增强。其次，他大力储备粮食，修复运粮道路，确保了军队的供给和后勤保障。此外，他沉着应战，镇压起义，并解决了冗兵现象，使边境相对安定，矛盾有所缓和。通过这些努力，文彦博在当时的军事和政治环境中发挥了重要作用，为国家的稳定和统一做出了积极贡献。	文彦博在战争胜利中所作的贡献包括：大胆发表意见，为战争胜利提供了系件；修复了曲折遥远的道路；储备大量粮饷以平息贝州王则起义；裁兵使边境财政矛盾得以缓和。	a	a	文彦博在宋朝时期作出了多方面的贡献，主要体现在以下几个方面： 1. 战略决策：在宋夏战争期间，文彦博提出了放权给前线将领的战略建议，这一建议得到了宋仁宗的采纳。这种战时的灵活应变策略有助于集中军事力量，提高战斗效率，最终帮助宋朝取得了战争的胜利。 2. 经济建设与管理：文彦博在任河东转运副使期间，继承并发展了修复运粮饷道路的工作，有效地解决了当地的运输问题，并为后续的军事行动储备了大量粮饷。他的这些措施不仅促进了地方经济的发展，也为国家的军事行动提供了坚实的物质基础。 3. 军事行动：在贝州王起义时，文彦博积极响应朝廷的号召，主动请求前往讨伐。他的沉着应战和巧妙的战术（如在南城挖地道直通城里）帮助官军最终平息了起义，显示了他在实际军事行动中的卓越能力。 4. 军队改革：文彦博深刻认识到宋朝长期面临的冗兵问题，并与同仁商议，提出了裁减八万兵员的计划。这个计划不仅减轻了国家的财政负担，也有助…	文彦博在宋夏战争中提出改变旧规，给予前线将领放权，使得军事指挥更加灵活，最终帮助宋朝取得了胜利。他修复麟州的运粮饷道路，储备粮饷，为朝廷应对王则起义提供了充足的物资支持。在讨伐贝州王起义时，文彦博沉着应战，采取了多方面的战术，最终平息了起义。此外，他与同仁商议裁减兵员，缓解了宋朝长期面临的冗兵现象，使边境财政矛盾得到一定缓解。总而言之，文彦博在政治、军事、经济等方面都做出了重要贡献，为宋朝的稳定和发展起到了关键作用。	b	b	b	b	a	b	what
文彦博，字宽夫，汾州介休人。在宋夏战争兴起后，文彦博发现有贻误战机的旧规，他大胆向皇帝进言:这是平时的规定,现在战时情况多变,应当给前线将领放权,否则将权不集中,军法不严峻。宋仁宗吸取他的意见,宋朝最终取得了这场战争的胜利。文彦博以直史馆的身份任河东转运副使时,继承他父亲的志愿,修复了麟州(今陕西省神木县北)曲折遥远的运粮饷道路，并由此而储备了大量粮饷。当贝州王则起义，朝廷派兵久战未灭时，文彦博主动请求去讨伐，他沉着应战，一面让官军猛攻北城，另一方面在南城挖地道直通城里。最后官军入城，将王则抓捕，起义终于得到了平息。针对宋朝长期面临的冗兵现象，文彦博与同仁商议,计划总计裁省兵员八万人,包括支付原俸禄一半的士兵和将佐。这次裁兵使边境财政矛盾稍有缓和。宋神宗即位后,曾对文彦博说:“虽然是天命,但也靠人谋,您品性深厚,不宣扬自己的善德,阴德如丙吉,真是定策的大臣,是国家的依靠。”文彦博则回答:…	根据材料并结合所学知识,说明文彦博身上展现的优秀品质。	优秀品质在于文彦博高调做事、敢于担当的作风充分体现其忠心为国为民的精神，在处理政务和军务方面体现其遇事沉着冷静的良好心态，将功劳让给别人反映其低调做人、不贪功的气魄和优秀品格。	文彦博展现出了优秀的品质。首先，他有远见和大局意识，能够看到问题的全貌和未来发展方向。其次，他有谋略和智慧，能够灵活应对各种复杂局面。另外，他为人正直，敢于提出建设性意见，表现出了勇气和诚实。最后，他谦虚谨慎，同时有扎实的实际行动，展现了深厚的品性和优秀的领导能力。	文彦博展现出的优秀品质有四点。首先，他善于变通，机智灵活，能够迅速应对各种情况。其次，他沉着冷静，拥有出色的军事才能，能够在紧急情况下保持冷静并做出正确的决策。第三，他的品性深厚，善良待人，体现出高尚的道德品质。最后，他谦逊谨慎，乐于奉献，不求回报，为他人着想，展现出高尚的品质和情操。	b	a	文彦博身上展现了多种优秀品质，以下是结合材料和所学知识的分析： 1. 创新思维与战略眼光：文彦博在宋夏战争中，能够洞察到旧规在战时的局限性，并勇于向皇帝提议放权给前线将领，集中权力，严峻军法。这种创新思维和战略眼光帮助宋朝取得了战争的胜利。 2. 志愿服务与实践行动：文彦博继承了父亲的志愿，修复了麟州的运粮饷道路，并储备了大量粮饷。这种志愿服务和实际行动体现了他对国家的责任感和对人民的关怀。 3. 军事指挥能力：在贝州王起义时，文彦博主动请求讨伐，并沉着应战。他既让官军猛攻北城，又在南城挖地道直通城里，最后成功平息了起义。这显示了他在军事指挥上的能力和战略战术的运用。 4. 财政管理能力：文彦博与同仁商议，计划裁省兵员八万人，并支付原俸禄一半的士兵和将佐。这不仅体现了他对财政的管理能力，也显示了他对国家财政负担的深刻理解和解决问题的决心。 5. 谦虚谨慎：尽管宋神宗对文彦博的品性深厚和阴…	文彦博身上展现出的优秀品质包括勇敢、谋略、忠诚、深思熟虑和谦逊。他在战争中大胆向皇帝进言，提出改变旧规以适应当时的战争情况，展现出了他的勇气和谋略。同时，他修复运粮饷道路并储备粮饷，主动请求去讨伐叛乱，以及提出裁兵计划，显示了他对国家利益的忠诚和深思熟虑。在与宋神宗的对话中，他谦虚地回答并把功劳让给其他历史上的定策臣子，展现出了他的谦逊和低调。	a	b	b	a	b	b	what
20世纪初,欧洲列强普遍部署军用信鸽,英军则试图倚重基于科学和新技术之上的通信手段。与海军舰船只能携带信鸽向岸上单向传送消息不同,陆军的信鸽在收发位置大致固定后,有可能完成双向传送。在1915年6月的第二次伊普尔战役中,信鸽表现优秀,受到重视,信鸽部队也成为信号处下属的重要分支。英国《国土保卫法》细则规定:打死、打伤或骚扰信鸽,持有不属于自己的信鸽,或者未经主人允许持有其信鸽为犯罪行为。为了应对德国海军在北海的布雷行动,英国海军信鸽部队最先组建,其后是陆军信鸽部队,最后是空军信鸽部队。而国家竞翔联盟在此过程中发挥了重要作用,成功动员了大批养鸽人参军,并向军队无偿提供信鸽。1918年3月21日,德军在西线突然发动猛烈的春季攻势,信鸽的战术作用和战略价值在英军抵抗与反击过程中得到突出体现。信鸽送达的情报为协约国军队稳定战线、部署反击以及最终打退德军的攻势,赢得了宝贵的时间。摘编自贾珺《英国信…	根据材料，概括信鸽在一战中受到英国重视的原因。	原因在于战时部队通信保障面临技术难题，陆战中优势明显，适合短途快速传递文字信息，群众基础广泛，组织有序得当。	英国重视信鸽在一战中的原因有四点：首先，当时的情报传送方式落后，而信鸽传送速度较快，为情报传递提供了重要帮助。其次，信鸽的培养成本低，实用性强，能够在战争中发挥重要作用。第三，信鸽具有双向传送功能，速度快，能够快速传递消息。最后，信鸽在战争中表现优良，为胜利赢得了宝贵的时间。	英国重视信鸽在一战中的原因是因为它们可以传送信息，尤其是在陆军中，信鸽可能会完成双向传送任务。此外，信鸽在第一次世界大战中表现出色，也增加了它们受到重视的程度。	a	b	信鸽在一战中受到英国重视的原因主要有以下几点： 1. 双向传送能力：与海军舰船只能携带信鸽单向传送消息不同，陆军的信鸽可以在收发位置大致固定后完成双向传送，这大大提高了通信的效率和灵活性。 2. 在战场上的表现：在1915年6月的第二次伊普尔战役中，信鸽表现出色，能够在危险的战场环境中准确无误地传递信息，受到英军的高度重视。 3. 法律保护：英国《国土保卫法》细则对信鸽进行了特别的保护，规定了打死、打伤或骚扰信鸽、持有不属于自己的信鸽或者未经主人允许持有其信鸽为犯罪行为，这表明了信鸽在战时通信中的重要性。 4. 应对德国海军布雷行动：为了应对德国海军在北海的布雷行动，英国海军首先组建了信鸽部队，后来陆军和空军也相继组建了信鸽部队，这说明信鸽在军事通信中的战略价值。 5. 国家竞翔联盟的支持：国家竞翔联盟成功动员了大批养鸽人参军，并向军队无偿提供信鸽，这进一步体现了信鸽在战争中的重要作用。…	根据材料，信鸽在一战中受到英国重视的原因主要有以下几点：首先，信鸽在战场上展现出优秀的表现，完成了双向传送消息的任务，成为军队通信的重要工具。其次，信鸽的战术作用和战略价值在战斗中得到了突出体现，为军队提供了宝贵的情报，帮助稳定战线、部署反击和打退敌军的攻势。此外，英国国土保卫法的规定和国家竞翔联盟的支持也促使英国军队重视信鸽的运用。因此，信鸽在一战中得到英国重视的原因是其在战场上的表现突出，为军队提供了重要的通信支持，成为不可或缺的军事工具。 。	b	a	a	b	a	b	why
20世纪初,欧洲列强普遍部署军用信鸽,英军则试图倚重基于科学和新技术之上的通信手段。与海军舰船只能携带信鸽向岸上单向传送消息不同,陆军的信鸽在收发位置大致固定后,有可能完成双向传送。在1915年6月的第二次伊普尔战役中,信鸽表现优秀,受到重视,信鸽部队也成为信号处下属的重要分支。英国《国土保卫法》细则规定:打死、打伤或骚扰信鸽,持有不属于自己的信鸽,或者未经主人允许持有其信鸽为犯罪行为。为了应对德国海军在北海的布雷行动,英国海军信鸽部队最先组建,其后是陆军信鸽部队,最后是空军信鸽部队。而国家竞翔联盟在此过程中发挥了重要作用,成功动员了大批养鸽人参军,并向军队无偿提供信鸽。1918年3月21日,德军在西线突然发动猛烈的春季攻势,信鸽的战术作用和战略价值在英军抵抗与反击过程中得到突出体现。信鸽送达的情报为协约国军队稳定战线、部署反击以及最终打退德军的攻势,赢得了宝贵的时间。摘编自贾珺《英国信…	根据材料并结合学知识，概述英国信鸽在一战中的作用。	作用在于有利于保障国家安全，及时传递了情报，为协约国在一战中的胜利赢得了时间，客观上也有助于保护信鸽和其他鸟类。	在一战中，英国信鸽发挥了重要作用。首先，信鸽节省了大量情报传送时间，为军方赢得了宝贵的时间。其次，信鸽能够快速传达情报，提高了战略布局的精确性，并满足了调整需要。另外，信鸽不易被拦截，大大确保了情报的安全性和准确性。因此，英国信鸽在一战中扮演了重要的情报传递角色，对战争的胜利产生了积极影响。	在一战中，英国信鸽发挥了重要作用。通过信鸽送达的情报，协约国军队能够稳定战线部署反击，最终打退德军，赢得宝贵时间。这些情报对于军队的战略决策起到了关键作用，帮助他们在战争中取得胜利。	a	a	英国信鸽在一战中的作用主要体现在以下几个方面： 1. 信息传递：信鸽作为一种快速、可靠的通信手段，在战场上发挥了重要作用。它们能够在敌人的防线上方自由飞行，传递重要的军事信息，如敌军动向、战术布置等。例如，在1915年6月的第二次伊普尔战役中，信鸽的表现出色，帮助英军收集和传递了大量战场信息。 2. 情报收集：信鸽部队不仅仅是信息传递者，它们还被用来收集敌方情报。通过训练有素的信鸽，英军能够在敌人防线上方进行侦察，收集重要的军事信息。 3. 心理战：信鸽的存在也对敌人产生了心理影响。敌军看到信鸽在战场上自由飞翔，可能会产生一定的心理压力，认为英军有着强大的后勤支持和通信网络。 4. 战略价值：在1918年3月21日德军发动的春季攻势中，信鸽的战术作用和战略价值得到了突出体现。它们帮助英军稳定战线、部署反击，并最终打退了德军的攻势，赢得了宝贵的时间。 5. 国际合作：英国信鸽在一战中的作用…	在一战中，英国信鸽发挥了重要的作用。通过运用科学和新技术，英国军队建立了海军、陆军和空军信鸽部队，利用信鸽进行双向传送消息。这些信鸽在战场上扮演了情报传递的重要角色，为协约国军队提供了关键信息，帮助他们稳定战线、部署反击，并最终打退德军的攻势。英国信鸽的战术作用和战略价值在战争中得到了突出体现，为军队赢得了宝贵的时间，对战局的发展产生了积极的影响。 。	b	a	b	b	a	b	what
19 世纪晚期开始，许多有识之士意识到茶业危机，纷纷走出国门学习先进茶业技术。尤其是在参加国际博览会后，国人学习到先进的商业理念，意识到宣传的重要性。之后国人逐步加大宣传力度,推选产品参加博览会再到成功在国内举办博览会,在改良茶业方面取得重大成就。1899年,中国茶业教育迈出了历史性的第一步,开始设立茶务课程。至20世纪初,专门的茶务学堂也被提上日程。1907年成立的中国茶商会,建立之初就注意宣传中国茶叶,旨在保护在印度茶叶、锡兰茶叶威胁之下的英国市场。民国政府也重视茶业改良与茶业科技的进步,在实验过程中借鉴外国成功经验,并结合本国的实际情况培育出优质品种,优化了一些名牌茶种；在加工方面，采用机器制茶代替了原来的手工制茶；着重对茶叶的包装进行改良。1916年,中国茶业公司在上海建立,在机器引进、改良茶树种植和外销茶业包装以及加大茶叶的商品宣传等方面取得了突出的成就。	根据材料二,简述19世纪末20世纪初中国茶叶改良运动取得的成就,并分析取得这些成就的原因。	成就在于引进了先进的技术设备和商业经营理念，近代茶叶教育得到发展，茶业改良与茶业科技取得进步，茶叶包装和宣传大大改进，建立了近代性的茶商会和茶叶公司，原因在于有识之士的危机意识，印度、锡兰茶叶的竞争压力，政府的支持和重视，西方工业文明的传播。	在19世纪末20世纪初的中国茶叶改良运动中取得了一些显著的成就。首先，于1899年中国茶业教育迈出了历史性的第一步。随后于1907年成立的中国茶商会着眼于宣传中国茶叶，保护中国茶叶在印度茶叶和锡兰茶叶的竞争下英国市场的地位。而在1916年，中国茶业公公司在上海成立，取得了突出的商业宣传成就。这些成就的取得得益于许多有识之士在19世纪晚期开始意识到茶业危机，纷纷出国学习先进的茶业技术，为中国茶叶的改良和发展奠定了基础。	19世纪末20世纪初，中国茶叶改良运动取得了一系列成就。首先，茶业教育得到推动，建立了茶务课程，为茶叶产业培养了更多专业人才。其次，在茶叶改良和茶业科技方面取得了极大进步，提升了茶叶的质量和产量。此外，通过加大宣传，成功打造出了国际品牌，使中国茶叶在国际市场上有了更大的影响力。 这些成就的取得原因主要有四点。首先，有识之士个人的推动起到了关键作用，他们积极倡导茶叶改良，推动了整个产业的发展。其次，西方先进商业理念的影响也起到了推动作用，使中国茶叶产业开始注重市场需求和品质提升。此外，民国政府的支持也是重要因素，政府出台政策支持茶叶改良，为产业发展提供了有力保障。最后，茶商会的大力宣传也起到了推动作用，使更多人了解和认可中国茶叶，为中国茶叶走向国际市场奠定了基础。	b	a	19世纪末20世纪初中国茶叶改良运动取得了显著的成就，主要体现在以下几个方面： 1. **茶业教育的发展**：1899年，中国茶业教育迈出了历史性的第一步，开始设立茶务课程。到20世纪初，专门的茶务学堂也被提上日程。这表明中国开始重视专业化的茶叶生产和管理知识的培养，为茶叶改良提供了人才支持。 2. **茶商会的成立**：1907年成立的中国茶商会，旨在保护中国茶叶在国际市场上的地位，特别是在面对印度茶叶和锡兰茶叶的竞争时。通过这种组织化的宣传和保护措施，中国茶叶在国际市场上的知名度和竞争力得到了提升。 3. **政府支持**：民国政府重视茶业改良与茶业科技的进步，借鉴外国成功经验，并结合本国的实际情况培育出优质品种。政府的支持和引导为茶叶改良提供了政策和资金上的保障。 4. **加工技术的现代化**：采用机器制茶代替了原来的手工制茶，提高了生产效率和茶叶的质量。这种技术的进步显著提升了…	根据材料二，19世纪末20世纪初中国茶叶改良运动取得了一系列重大成就。首先，在教育方面，中国开始设立茶务课程，并建立了专门的茶务学堂，为培养专业人才奠定了基础。其次，中国茶商会的成立和中国茶业公司的建立，有效推动了中国茶叶在国际市场上的宣传和销售，保护了中国茶叶在外国市场的地位。此外，通过引进外国成功经验并结合本国实际情况，中国成功培育出优质茶树品种，采用机器制茶代替手工制茶，改良茶叶包装，从而提升了茶叶的品质和竞争力。 这些成就的取得有多方面的原因。首先，国人意识到茶业危机，开始积极学习先进的茶业技术和商业理念，这为茶叶改良运动提供了强大的动力。其次，国人逐步加大宣传力度，意识到宣传的重要性，这帮助中国茶叶在国际市场上获得更多的认可和市场份额。此外，民国政府的重视和支持也是取得这些成就的重要原因之一，政府的投入和政策支持为茶叶改良运动提供了必要的资源和环境。 综上所述，19世纪末20世…	b	b	b	b	a	b	why
晚清是中国社会治理发生变革的重要时期,官方系统与民间系统之间原有的力量对比被打破。从嘉庆年间的白莲教起事到咸同时期的太平天国运动,清朝官方的基层治理系统逐渐失灵,以乡绅为中心的团练组织成为应对社会动乱的重要力量,民间治理系统开始一枝独大。鸦片战争后,一系列不平等条约对中国经济和社会产生巨大冲击,中华民族面临亡国灭种的危险。这促使国人逐渐觉醒,寻求救亡图存之道。因此,中国的基层社会治理在原有的“公”与“私”两大系统之外,逐渐衍生出新的治理主体。晚清时期,各种社团逐渐出现,对基层社会治理产生了较大影响。譬如爱育善堂、广仁善堂、崇正善堂等在基层社会治理中充当了重要角色。虽然清末成立的地方自治研究社和警察组织受到西方的影响,但在中国固有传统中依然可以找到其身影。摘编自温建钦《近代基层社会治理出现转型》	根据材料一并结合所学知识,简析晚清社会治理发生变革的原因。	原因在于列强侵略的影响，中国社会性质的变化，西方制度文明的传入，中国社会经济结构的变动，农民起义的推动，晚清政府权威下降，中央集权弱化，民间力量的壮大。	清末社会治理发生变革的原因有以下几点：首先，清末农民运动的打击使清政府意识到传统的社会治理模式已经难以满足新形势下的需要。其次，鸦片战争后不平等条约对中国的经济和社会造成了巨大冲击，迫使清政府不得不进行改革以应对外部压力。第三，爱国人士的社团与清政府受西方影响，使社会治理主体新增，形成了一种新的治理格局。第四，受西方思想文化的影响，进一步推动了中国社会治理的变革。最后，清未新政的推动也在一定程度上促使了清朝社会治理的变革。这些因素共同作用，导致了晚清社会治理发生了重大的变革。	晚清社会治理发生变革的原因主要有三方面。首先，太平天国运动的起义导致社会动荡，关系复杂。其次，签订的一系列不平等条约侵犯人权，冲击封建社会，加剧了社会矛盾。最后，救国思潮兴起，促使人们寻求救亡图存之道，推动了晚清社会治理的变革。这些因素共同作用，使得晚清社会治理发生了深刻的变化。	a	a	晚清社会治理发生变革的原因主要可以从以下几个方面来分析： 1. 官方系统失灵：从嘉庆年间的白莲教起事到咸宜年间的太平天国运动，清朝官方的基层治理系统逐渐失灵。这些社会动乱暴露了清朝中央集权体系在基层治理上的不足，导致了民间力量的崛起。 2. 社会动乱与民间治理的兴起：在乡绅为中心的团练组织成为应对社会动乱的重要力量，民间治理系统开始一枝独大。这些团练组织在一定程度上填补了官方治理体系的空白，为基层社会治理提供了新的力量。 3. 不平等条约的影响：鸦片战争后，一系列不平等条约对中国经济和社会产生了巨大冲击，中华民族面临亡国灭种的危险。这促使国人逐渐觉醒，寻求救亡图存之道。社会治理的变革也在一定程度上是对外来压力的一种适应和反应。 4. 新治理主体的出现：在原有的“公”与“私”两大系统之外，中国的基层社会治理逐渐衍生出新的治理主体。各种社团如爱育善堂、广仁善堂、崇正善堂等在基层社会治理中充当…	晚清社会治理发生变革的原因有多方面的因素。首先，清朝政府的基层治理系统逐渐失灵，导致官方无法有效地管理社会动乱。其次，不平等条约的签订使得中国经济和社会受到巨大冲击，国家面临亡国灭种的危险，这促使国人逐渐觉醒，开始寻求救亡图存之道。此外，民间团练组织的兴起也在一定程度上填补了官方治理的空白，成为社会动乱时期的重要力量。同时，各种社团如爱育善堂、广仁善堂、崇正善堂等在基层社会治理中扮演了重要角色，为社会治理提供了新的可能性。最后，地方自治研究社和警察组织的成立也受到西方影响，但在中国固有传统中仍有体现。综合以上因素，晚清社会治理发生变革的原因是多方面的，包括政府治理失灵、外部压力、民间组织兴起和社团的作用等因素共同作用。	a	b	a	a	a	a	why
全面抗战爆发后,边区政府通过在军事上采用集中清剿和在政治上分化瓦解的手段平区息匪患问题、此外还建立和整肃自卫军和保安队以增强地方武装力量来维护社会治安、打击建土匪,陕甘宁边区前后颁布了20多项相关法令来禁烟禁毒,设立专门机构,专门负责处理禁烟禁毒相关事宜。1937年至1945年,因天灾、战争,大量难民、灾民涌入边区,总计达266619人。边区鼓励移、难灾民开荒自救,安置移、难灾民。政府规定:移入边区的难民或灾民享有请求政府分配土地及房屋,协助解决生产工具,免纳两年至五年之土地税,减免义务劳动负担等方面的优待;移民享受和边区人民同等的民主权利。并颁布了多个有关婚姻的法律文件,明确规定一夫一妻、男女平等、禁止包办买卖婚姻。同时废除早婚陋习,彻底革买除旧式婚姻,努力从各方面提高妇女的社会地位。此外,边区政府还注重采取多种措施改造游民，营造新风。——摘编自姜秀华《陕甘宁边区农村社会治理的实践与启…	根据材料二并结合所学知识,概括陕甘宁边区政府的基层社会治理措施。	措施在于平息匪患，强制推进禁烟禁毒活动，救济和安置灾民，革除旧式婚姻陋习，提高妇女的社会地位。	陕甘宁边区政府采取了集中清剿、武装力量维护治安的措施，设立相关法令与机构，并维护民主权利，废除陋习，实现相对平等的社会地位。	陕甘宁边区政府在基层社会治理方面采取了多项措施：建立地方武装力量维护治安，出台系列措施安置移民、灾民，改造游民，营造新风，出台相关法令，专门处理禁因禁毒事宜，采用三三制，巩固抗日民族统一战线。	tie	a	陕甘宁边区政府在全面抗战爆发后，采取了一系列基层社会治理措施以应对内忧外患。首先，在军事上，边区政府通过集中清剿和政治分化瓦解的方式来平息匪患问题。其次，在政治和社会治安方面，边区政府建立和整肃了自卫军和保安队，以增强地方武装力量，维护社会治安，打击土匪活动。此外，为了解决禁烟禁毒问题，边区政府颁布了多项相关法令，设立了专门机构来处理这些事宜。 在应对难民和灾民问题上，边区政府鼓励他们开荒自救，并提供了土地和房屋分配、生产工具协助、土地税减免以及免除义务劳动负担等优待政策。同时，边区政府还确保难民和灾民享有与边区人民同等的民主权利。 在婚姻和妇女地位方面，边区政府颁布了多个法律文件，明确规定一夫一妻制、男女平等，并禁止包办买卖婚姻。同时，边区政府废除了早婚陋习，革新了旧式婚姻制度，努力提高了妇女的社会地位。 最后，为了改造游民，边区政府采取了多种措施，营造了新的社会风气。这些措施综合了军…	陕甘宁边区政府在基层社会治理方面采取了多项措施，包括通过集中清剿和分化瓦解等手段解决匪患问题，建立和整顿自卫军和保安队来维护社会治安，禁烟禁毒并设立专门机构处理相关事宜，安置大量难民和灾民并给予优待，规定移民享有民主权利，颁布有关婚姻的法律文件强调男女平等和禁止包办买卖婚姻，改善妇女社会地位，改造游民并营造新风。这些措施综合起来，构成了陕甘宁边区政府在基层社会治理方面的全面举措。\n	b	b	b	b	a	a	how
材料一 17世纪,英国失地农民的数量还比较有限。1536年法令规定:所有健康的人,一旦被发现乞食，要被剥光衣服，绑在马车后游街示众，同时鞭打至流血，然后遣返原籍。随着圈地规模的扩大,英国政府逐渐认识到,农民进城流浪的问题是社会转型带来的。1572年法令规定:对贫民要进行救济,要求治安法官给每个教区的贫民登记造册,将他们遣返回乡,由当地安置。随着农村剩余劳动力越来越多,失业问题成为比流民更为严重的问题。1629年法令明确指出:要尽一切可能“为贫民提供资金和原材料,安排他们就业”。随着工业革命的逐步开展,工业化地区需要更多的劳动力。1834年《新济贫法》规定:贫困者必须进入济贫院,参加劳动,其目的是培养受救济者的劳动习惯,使他们能靠劳动谋生。	根据材料一并结合所学知识,概括英国处理农村剩余劳动力政策有什么变化,并说明其积极影响。	变化在于从以惩罚为主过渡到以救济为主，后又发展到解决其就业问题，积极影响在于有利于缓和社会矛盾，促进社会稳定，把农村剩余劳动力和就业联系起来，有利于工业革命的开展，推动了城市化进程，促进了英国社会的转型。	英国处理农村剩余劳动力政策经历了从最初的严厉惩罚到后来的救济和培训的转变。这种变化对社会产生了积极影响，促进了社会劳动力的发展，维护了社会治安，减少了动乱。	英国对农村剩余劳动力的政策经历了从暴力、武力对待到帮助、援助的变化。这一变化带来了积极影响，包括使社会稳定，避免混乱；解决农村剩余劳动力带来的财政问题；提高劳动人民的生活质量。	a	a	根据材料一，英国处理农村剩余劳动力政策经历了几个阶段的变化： 1. 1536年法令：当时的政策侧重于惩罚乞食者，通过游街示众和鞭打来威慑其他人从事乞讨行为。这种政策更多的是出于对社会秩序的维护，而不是对劳动力问题的有效解决。 2. 1572年法令：随着圈地运动的扩大，英国政府开始认识到城市流浪问题的严重性，并尝试通过登记造册的方式将贫民遣返回乡，试图通过这种方式减少城市的贫民问题。 3. 1629年法令：随着农村剩余劳动力问题的加剧，政策转向了提供资金和原材料，安排贫民就业。这种政策试图通过提供就业机会来解决贫困问题。 4. 1834年《新济贫法》：随着工业革命的推进，工业化地区对劳动力的需求增加，这个法案规定贫困者必须进入济贫院，参加劳动。这种政策的目的是通过劳动来培养受救济者的劳动习惯，使他们能够靠劳动谋生。 这些政策的积极影响主要体现在： - 提高了劳动力的利用效率：通过提供就业机…	英国处理农村剩余劳动力政策经历了从严厉惩罚流民到提供救济和就业机会的转变。最初的政策是对乞丐进行残酷的体罚和遣返，但随着时间的推移和社会转型，政府开始意识到需要给予贫民救济，并提供就业机会。随着工业革命的发展，政府还出台了培养受救济者劳动习惯的措施。这些政策的转变积极影响在于逐渐解决了农村剩余劳动力的问题，促进了劳动力的流动和工业化地区的发展，同时也提高了贫困者的生活质量和劳动技能，使他们能够通过劳动自力更生。	b	b	b	b	b	b	what
中共中央在1983年下发第二个“中央一号文件”。它的主要精神: (1)稳定和完善农业生产责任制,改革人民公社的体制。(2)搞活经济,继续放宽某些政策,走全面发展、综合经营的道路。总之，“就是要按照我国的国情，逐步实现农业的经济结构改革、体制改革和枝术改革，走出一条具有中国特色的社会主义的农业发展道路”。经过一年的实行，农业生产获得了创纪录的丰收，农村工作取得了令人鼓舞的进展。	根据材料并结合所学知识，概括 20世纪七八十年代中国经济体制改革的意义。	意义在于有利于提高农民生产积极性，促进了农业的发展，增强了企业活力，有利于城市经济的发展，为后期社会主义市场经济体制的确立奠定了基础。	20世纪七八十年代中国经济体制改革的意义是：农业生产取得了创记录的丰收，社会生产力大大提高，推动了社会经济向前发展，并逐渐走出一条具有中国特色的社会主义的农业发展道路。	20世纪七八十年代中国经济体制改革的意义在于以农民农业为主，根据中国国情发展出中国特色社会主义的农业道路，为人民谋幸福。	tie	a	20世纪七八十年代中国经济体制改革，尤其是农业生产责任制的改革和经济体制的放宽，对中国的现代化进程产生了深远的影响。这些改革的意义主要体现在以下几个方面： 1. 改革促进了农业生产的稳定和发展：通过稳定和完善农业生产责任制，农民的积极性得到了提升，农业生产责任制的改革有效地解决了人民公社体制下的生产积极性低下问题。例如，1984年的农业生产实现了历史上的最高产量，显示了改革的成效。 2. 推动了经济体制的多元化：改革鼓励了经济的多元化发展，允许农民和企业在一定范围内进行市场交易，促进了经济的活力和创新能力。这种改革有助于中国经济从计划经济向市场经济转型，为后来的经济快速增长奠定了基础。 3. 促进了农村社会的进步：通过改革，农村社会的结构和功能发生了变化，农民的生活水平得到了提高，农村的社会经济状况得到改善。农村改革的成功为中国的社会稳定和政治发展提供了重要的支撑。 4. 实现了中国特色…	在20世纪七八十年代，中国经济体制改革的意义主要体现在农业生产责任制的稳定和完善，以及搞活经济、放宽政策、全面发展、综合经营等方面。这些改革举措带来了农业生产的创纪录丰收和农村工作的令人鼓舞进展，为中国农村经济的发展奠定了基础。此外，这些改革也为中国后续的经济体制改革奠定了重要基础，为中国经济的快速发展和现代化进程提供了动力和方向。总的来说，20世纪七八十年代的中国经济体制改革意义重大，促进了农业和农村经济的发展，也为中国整体经济的转型和发展奠定了基础。 。	b	b	b	a	b	b	why
材料一 一战后缔结的和约全面和平解决国际争端的特点对世界历史来说是十分重要的。国际联盟作为第一个立誓共同防御侵略、以非暴力方法解决争端的世界范围的国际合作组织……在民族自决原则的基础上重新划分欧洲边界的特点……《国际联盟》第22条把从同盟国手中获得的殖民地居民看作是“在现代世界的紧张形势下还不能自己站立的民族。”因此,这一条款规定: “这些民族的监护应该委托给那些先进民族”。	根据材料一概括巴黎和会解决国际争端的方式。	方式在于建立国际联盟，实行民族自决，推行委任统治。	根据材料一，巴黎和会解决国际争端的方式主要有两种：一是根据《国际联盟》中的条约来解决国际争端；二是根据各国的经济实力来做判断。	根据材料一，巴黎会解决国际争端的方式主要有两种：一是通过民族自决重新划分欧洲边界，二是将被殖民地监护权交给先进民族。	b	b	根据材料一，巴黎和会解决国际争端的方式主要体现在以下几个特点上： 1. **国际联盟的成立**：国际联盟作为第一个旨在共同防御侵略并通过非暴力手段解决争端的国际合作组织，标志着国际争端解决的新途径。 2. **民族自决原则**：在欧洲边界的重新划分中，民族自决原则被采纳，这意味着争端的解决需要考虑到不同民族的利益和自决权。 3. **殖民地居民的监护**：《国际联盟》第22条规定，获得和平后从同盟国手中获得的殖民地居民被视为“在现代世界的紧张形势下还不能自己站立的民族”。这意味着这些殖民地居民的监护权被赋予了先进的民族，这一做法体现了当时国际社会对殖民地居民的保护和指导。 这些特点体现了巴黎和会试图通过国际合作和民族自决原则来实现国际争端的全面和平解决，同时也反映了当时国际社会对于殖民地问题的处理方式。	根据材料一，巴黎和会解决国际争端的方式主要包括通过国际联盟共同防御侵略、以非暴力方法解决争端，以及在民族自决原则的基础上重新划分欧洲边界。此外，根据《国际联盟》第22条规定，殖民地居民被视为“在现代世界的紧张形势下还不能自己站立的民族”，监护应委托给那些先进民族。因此，巴黎和会通过国际合作组织和重新划分边界的方式来解决国际争端。 。	a	b	b	a	a	a	how
作为二战的重要成果,二战后期确立的国际秩序依然是世界和平与稳定的基础,由国际政么经济变化的现实,通过推进国际关系民主化和国际治理法治化。使之得到进一步补充、完善与发展,并能够可持续地维护和平。材料二-徐蓝《第二次世界大战史研究的新进展》	根据材料二并结合所学知识，分析材料中“二战后确立的国际秩序”产生的影响。	影响在于推进国际关系民主化和国际治理法制化，推动世界和平与发展，由于各国政治经济发展不平衡，导致局部地区关系紧张，不利于长远和平，需不断发展和完善。	根据材料二并结合所学知识，二战后确立的国际秩序产生了重要的影响。首先，这一秩序有效地维护了世界和平稳定，通过建立联合国等国际组织，促进国家之间的合作与对话，防止了大规模的冲突和战争的爆发。其次，这一秩序对于那些想要发动战争的国家进行了制止，通过国际法的约束和国际社会的压力，阻止了潜在的侵略行为。此外，这一秩序也维护了弱国的权利，通过国际组织的支持和协助，弱国能够获得更多的保护和支持，避免成为强国的牺牲品。最后，这一秩序减少了战争对百姓带来的灾难，通过推动国际合作与发展，提高了世界各国的生活水平和福祉，减少了战争带来的破坏和伤害。因此，二战后确立的国际秩序对于维护世界的和平与稳定，保护弱国权利，制止战争等方面产生了积极的影响。	二战后确立的国际秩序对世界产生了深远影响。首先，这一秩序的建立使得世界能够长期维持和平，促进了世界经济体系的变革。其次，这一秩序客观上促进了经济的发展，为世界各国的经济增长提供了有利条件。最后，这一秩序推动了国际关系的民主化和国际治理的法治化，为国际社会的稳定和发展提供了坚实基础。因此，二战后确立的国际秩序对世界产生了积极的影响。	a	a	根据材料二徐蓝《第二次世界大战史研究的新进展》，二战后确立的国际秩序主要体现在以下几个方面： 1. **联合国的成立**：二战后期，为了防止未来的战争，国际社会共同创立了联合国，旨在维护国际和平与安全，促进国际合作和发展。联合国通过多边谈判和协商解决国际争端，提供了一个国际关系民主化的平台。 2. **国际法的发展**：二战后，国际法得到了快速发展，尤其是人权法、国际人道法和国际刑法等领域的规范更加完善。这些法律的建立和实施有助于维护国际法治化，促进国家间的正义和公正。 3. **经济合作与发展**：二战后，国际经济秩序也得到了重塑，通过国际货币基金组织（IMF）、世界银行和世界贸易组织（WTO）等国际经济组织的建立，促进了全球经济的合作与发展，减少了经济冲突的可能性。 4. **欧洲集体安全体系的建立**：二战后，为了防止欧洲再次陷入战争，北大西洋公约组织（NATO）和华沙条约组织（W…	根据材料二和所学知识，二战后确立的国际秩序对世界产生了深远的影响。首先，这一国际秩序促进了国际关系民主化，通过建立联合国等机构，国家之间的冲突得以通过协商解决，避免了类似第一次世界大战的悲剧重演。其次，国际治理法治化的进程也得到了推进，国际法的制定和执行变得更加规范和有效，有助于维护世界和平与稳定。此外，国际秩序的建立也为全球经济的发展提供了有利的环境，促进了贸易和合作，推动了经济全球化的进程。 总的来说，二战后确立的国际秩序使得国际关系更加民主化和法治化，为世界和平与稳定提供了基础，同时也推动了全球经济的发展。然而，随着国际形势的变化和新挑战的出现，这一国际秩序也需要不断补充、完善和发展，以适应新的国际环境和需求。	b	b	b	a	b	b	what
材料三 构建人类命运共同体,是基于中国对当今世界和平与发展大势的准确把握,是源自中华文明“以和为贵”“协和万邦”的和平思想与和谐理念，是中国为推动世界和平与可持续发展给出的一个可供选择的、理性可行性的行动方案,是为了推动国际秩序和国际体系朝着更加公正合理的方向发展。	根据材料三并结合所学，说明中国首倡人类命运共同体的背景。	背景在于当今世界格局的演变，中华民族具有和平思想、和谐理念的历史传统，中国综合国力的提升，中国在国际体系中的角色变化，中国坚持走和平发展道路，维护世界和平是人类的共同诉求。	中国首倡人类命运共同体的背景是二战后各国都不想再次爆发战争，世界紧密地连成一体，经济的全球化趋势日益明显。作为一个爱好和平的国家，中国秉持着传统美德，致力于推动国际秩序和国际体系朝着更加公正合理的方向发展。在这样的背景下，中国提出了人类命运共同体的理念，强调人类命运紧密相连，各国应该携手合作，共同应对全球性挑战，促进世界和平与发展。	中国首倡人类命运共同体的背景主要有三个方面。首先，中国在不断的战争中找到了自己的发展道路，意识到单靠强大军事力量无法解决问题，需要与其他国家共同发展。其次，五四运动的发起让中国人意识到民族独立和国家繁荣需要国际合作。最后，中国文明中“以和为贵”“协和万邦”的和平思想与和谐理念，也促使中国提出人类命运共同体的概念，希望通过合作共赢，实现世界和平与繁荣。	a	a	中国首倡人类命运共同体的背景在于中国对当今世界和平与发展大势的深刻理解和准确把握。这种理解源自中华文明悠久的历史和文化，特别是“以和为贵”和“协和万邦”的和平思想与和谐理念。中国认为，为了推动世界和平与可持续发展，需要一个新的国际秩序和国际体系，这个体系应当更加公正合理。 中国的这一倡议是基于以下几个方面的考虑： 1. 全球化的现实：在全球化的背景下，国家之间的相互依存日益加深，全球问题如气候变化、公共卫生、经济不平等等需要全球合作来解决。 2. 文明交流与对话：中国历史上与周边国家和其他文明的交流与对话丰富多彩，中华文明的和平理念和和谐观念在长期的历史实践中得到了验证。 3. 国际关系的新特征：随着国际关系的发展，传统的零和游戏思维已经不能满足全球治理的需要，中国倡导的命运共同体理念强调合作共赢和共同发展。 4. 中国的发展经验：中国自己也经历了从贫穷落后到崛起的发展历程，深知发展不平…	中国首倡人类命运共同体的背景可以从以下几个方面来解释。首先，中国对当今世界和平与发展大势的准确把握，意识到全球化时代国与国之间相互依存、利益交融的现实。其次，源自中华文明“以和为贵”“协和万邦”的和平思想与和谐理念，使中国倡导构建人类命运共同体的理念不仅是出于现实需要，更是出于历史文化传统的根基。此外，中国作为一个发展中大国，积极推动国际秩序和国际体系朝着更加公正合理的方向发展，认识到只有共同合作、共同发展才能实现国与国之间长期稳定的相互关系。因此，中国首倡人类命运共同体旨在为推动世界和平与可持续发展提供一个可供选择的、理性可行性的行动方案，体现了中国积极参与国际事务、推动构建人类命运共同体的责任担当。 。	b	b	b	b	b	b	what
材料二 1851年5月1日,世界上的第一次博览会在英国召开。维多利亚女王发出外交邀请信1函,有10个国家接受了邀请,认真刻板的英国人动用了全国的经济力量,为第一届世界博览会布展,在这次世界博览会上, 14000件展出品中包括了一块24吨重的煤块,一颗来自印度的大金钢钻,还有一头标本大象,而引擎、水力印刷机、纺织机械则向参观者展示了现代工业的发展和人类焕发出的无限想象力， 这次世界博览会不仅是一次“眼花缭乱，丰富多彩”的陈列，而且开创了今后数十年的自由贸易的先驱……世界博览会因此被誉为“经济、科技与文化界的奥林匹克盛会”。-《回顾1851年英国伦敦首届世博会》	根据材料二并结合所学知识，概括英国举办世界上第一次博览会的原因。	原因在于政治上英国确立了资本主义制度，经济上完成了工业革命，经济处于世界领先地位。	英国举办世界上第一次博览会，旨在展示国家实力、促进经济发展、推动科技进步和促进文化交流。	英国举办世界上第一次博览会的原因是为了确立资本主义制度和展示工业革命的成就。展览共展出了14000件展品，其中包括现代工业成就和珍稀物品。	a	a	根据材料二和所学知识，英国举办世界上第一次博览会的原因主要是为了展示其国家的经济力量和工业发展水平。1851年，英国正处于工业革命的高峰期，工业生产和技术创新迅速发展，英国希望通过这次博览会向世界展示其在工程、制造和科技方面的成就。同时，这次博览会也为英国提供了一个平台，通过自由贸易的展览，推动国际交流和合作，开创了今后数十年的自由贸易先例。通过这次盛会，英国希望提升其在国际上的影响力，并促进国内外的商业和文化交流。	英国举办世界上第一次博览会的原因是为了展示其全国的经济实力和工业技术发展，同时吸引国际参与者，促进自由贸易和文化交流。通过展出各种现代工业产品和科技成果，英国希望展示自己的领先地位，提升国际声誉。此举也为未来的自由贸易做出了先驱性的贡献，为国际经济和科技的发展奠定了基础。通过举办世博会，英国成功地将其经济、科技和文化成就展示给世界，促进了全球的合作与交流。 。	a	b	b	a	a	a	why
材料三丝绸之路是起始于古代中国，连接亚洲、非洲和欧洲的古代陆上商业贸易路线，最初的作用是运输古代中国出产的丝绸、瓷器等商品，后来成为东方与西方之间在经济、政治、文化等诸多方面进行交流的主要道路。材料三丝绸之路是起始于古代中国，连接亚洲、非洲和欧洲的古代陆上商业贸易路线，最初的作用是运输古代中国出产的丝绸、瓷器等商品，后来成为东方与西方之间在经济、政治、文化等诸多方面进行交流的主要道路。随着改革开放的深入发展，经济全球化发展带来的机遇，2013 年，习近平总书记先后提出建设“丝绸之路经济带”和“21世记海上丝绸之路”的战略构想。这一跨越时空的宏伟构想,承载着丝绸之路沿途各国发展繁荣的梦想,必将赋予古老丝绸之路以崭新的时代内涵.——《“一带一路”构想的战略意义》	根据材料三并结合所学知识，分析中国实施“一带一路”战略的时代背景	背景在于中国深化改革开放，世界经济全球化趋势加强。	中国实施“一带一路”战略的时代背景是深化改革开放和经济全球化趋势加强。随着中国经济的快速发展，中国需要更好地融入全球经济体系，实现国际合作和互利共赢。同时，“一带一路”战略也旨在促进沿线国家的共同发展和繁荣，推动区域间的合作与交流。	中国实施“一带一路”战略的时代背景在于经济全球化所带来的发展机遇，这使得中国有机会更好地融入全球经济体系。同时，这一战略也有助于提升中国在国际事务中的影响力和话语权，增强国际合作和互利共赢的机会。通过推动中国从区域大国向全球大国的转变，并通过基础设施建设和贸易合作促进沿线国家的经济发展和繁荣，中国将能够更好地实现自身发展和国际合作的双重目标。	a	a	中国实施“一带一路”战略的时代背景主要体现在以下几个方面： 1. 经济全球化的发展：随着全球化的深入发展，世界经济已经形成了紧密的联系，各国之间的经济合作和互联互通日益增强。中国作为世界第二大经济体，积极参与全球经济治理，寻求通过“一带一路”战略与沿线国家加强经济合作，共同推动全球经济平衡和可持续发展。 2. 改革开放的深入推进：自1978年中国实施改革开放政策以来，中国经济取得了飞速发展。为了进一步推动经济发展，中国需要寻找新的增长点和合作平台，通过“一带一路”战略，中国能够扩大对外开放，吸引外资，促进国内外市场的对接。 3. 地缘政治的变化：21世纪以来，地缘政治格局发生了变化，特别是中亚、东欧、南亚等地区的国家对中国的经济合作和投资越来越感兴趣。中国通过“一带一路”战略，能够利用自身的经济优势，帮助沿线国家改善基础设施，促进区域经济一体化，增强区域合作的互信和互利。 4. 文化交流…	中国实施“一带一路”战略的时代背景主要包括以下几个方面：首先是全球化的发展趋势。随着经济全球化的深入发展，世界各国之间的联系日益紧密，互联互通的需求日益增长。中国希望通过“一带一路”倡议，促进沿线国家之间的合作与交流，共同应对全球性挑战，推动世界经济的健康发展。其次是中国经济发展的需要。中国作为世界第二大经济体，需要更多的市场和资源来支撑经济增长，而“一带一路”倡议可以帮助中国拓展海外市场，获取更多资源，促进中国与沿线国家的经济互补与合作。此外，中国也希望通过“一带一路”倡议提升自身在国际舞台上的地位和影响力，推动国际秩序的改革和完善。综上所述，中国实施“一带一路”战略的时代背景是全球化发展趋势下，中国经济发展的需要以及提升国际地位的战略考量。	a	a	a	a	a	a	what
材料—孔子招收的学生大多数都出身贫寒,例如颜回,《论语·雍也》记载说颜回居住在“陋巷”，只靠一碗饭、一瓢水维持生活；又比如仲弓，他的父亲很贫困，家里连一小块地也没有；另外还有子路等人也都出身微贱,家境贫寒,但孔子并没有因此而拒绝收他们为弟子。摘编自陈顺珍《浅谈孔子的教育思想》	根据材料一并结合所学知识,指出孔子的教育思想并进行简要评价。	教育思想是有教无类，评价为结束了贵族垄断的“官府之学”，推动了学术的下移，有利于教育的发展和向民间的普及。	孔子的教育思想主要体现在“有教无类”这一观念上，他认为每个人都有受教育的权利，不分阶级地都应该接受教育。这种观念包含着朴素的平等思想，有利于文化的传播和普及，打破了阶级对教育的垄断。孔子的教育思想对现代教育产生了重大深远的影响，启发人们认识到教育应该普及、公平，不应该受到阶级差异的限制。因此，孔子的教育思想在当今社会仍然具有重要的借鉴意义。	孔子的教育思想体现在以民为本，收徒不论权贵。他强调重视民生，注重人生平等。这种思想体现了孔子对教育的重要性和价值的认识，强调教育应该以培养人的全面发展为目标，而不应该受到社会地位的限制。这种教育思想对后世产生了深远的影响，成为中国传统教育的重要组成部分。	a	a	孔子的教育思想体现了平等和包容的原则，他不仅接受了来自贫寒家庭的学生，还鼓励他们追求知识和道德修养。孔子认为，教育不应受限于社会地位或经济条件，每个人都有平等的机会去学习和成长。例如，颜回和仲弓的家庭条件非常艰苦，但孔子并没有因为他们的贫困而拒绝他们，而是给予了他们学习的机会。 孔子的教育思想强调了“仁”、“义”、“礼”等道德品质的培养，以及通过学习经典和实践来实现个人修养和社会责任。孔子认为，教育不仅是知识的传授，更是品德的塑造和人格的培养。他鼓励学生们通过学习来提高自己，进而回馈社会。 简要评价孔子的教育思想，可以说它具有很高的社会责任感和人文关怀。孔子不仅关注个人的精神成长，也关注社会的和谐与进步。他通过教育的方式，传递了平等、包容和追求卓越的价值观，对后世产生了深远的影响。	孔子的教育思想主要包括尊重个体差异、注重德育、重视实践教育等方面。他尊重个体差异，不因学生出身贫寒而拒绝收他们为弟子，而是关注他们的潜力和品德。他注重德育，强调培养学生的品德修养和人格塑造，认为德行是一个人最重要的素质。此外，孔子重视实践教育，倡导学以致用，注重学生在实践中的体验和应用，以培养学生的能力和素质。 总的来说，孔子的教育思想强调品德教育、实践教育和个体差异的尊重，注重培养学生的道德素养和实践能力，致力于培养全面发展的人才。他的教育思想对后世产生了深远的影响，被奉为传统中国教育的重要组成部分。	b	a	a	b	b	b	others
汉武帝兴办官学，但并未使私学停止，相反，私学在官学的影响下得到发展。许多硕学名儒,在未从政或任博士之前,一直从事私人教学,还有一些已经为官者仍然从事收徒教学之事。汉代私人教学从形式上分为“蒙学”或“精舍”(或称精庐)两种。蒙学即童蒙的地方,也就是启蒙教育。精舍是私人专门建立的教学基地,由当时的经师大儒创办,这种私学兴起于西汉，到东汉时特别兴盛，其普及程度在古代史上空前。精舍的学生都比较多,少则百十人，多则千人以上。--摘编自曹新洲《汉代社会教育》	根据材料二并结合所学知识,简析汉代私学教育兴盛的原因	原因在于官学兴盛的推动，儒家思想确立了正统地位，私学是对官学必要的有益的补充，一批硕学名儒努力推动私学的发展。	汉代私学教育兴盛的原因主要有两点：一是受到儒家思想的影响，儒家思想在当时社会具有重要地位，成为私学教育的主要教育内容；二是科学教育相传已久，使得私学教育在汉代得以持续发展。	汉代私学教育兴盛的原因主要有三点。首先，官学的创办促进了社会尚学之风的形成。其次，儒学成为正统思想，对社会产生了巨大影响。最后，政府重用儒生，推动了他们学习的积极性高涨。	b	a	汉代私学教育兴盛的原因主要可以从以下几个方面来分析： 1. 官学与私学的互补性：汉武帝兴办官学为社会培养了一批合格的官员和文化人才，但并未完全取代私学。私学在官学的影响下，尤其是在汉代经历了长期的发展，形成了自己的特色和优势。私学能够更好地满足社会对高质量教育的需求，特别是对于那些希望深造或从事教学工作的学者。 2. 经济因素：私学往往依赖于私人资助，尤其是那些有经济基础的学者和家庭。随着社会经济的发展，越来越多的人有能力支持私学的发展。同时，私学可以根据学生的家庭经济状况提供不同的教育服务，从而吸引了更多的学生。 3. 教育自由度：私学提供了相对自由的教育环境，学生可以根据自己的兴趣和能力选择学习内容和方式。这种自由度吸引了许多有志于深造或追求学术研究的学生。 4. 教师的专业性和影响力：私学往往由当时的经师大儒创办，他们在学术上有深厚的造诣和较高的社会地位。这些老师能够吸引大量的学生…	汉代私学教育兴盛的原因可以从以下几个方面来分析： 首先，汉武帝兴办官学的推动作用。汉武帝对于教育的重视使得整个社会对教育的投入增加，官学的兴起为私学提供了更好的发展环境和教育资源。 其次，硕学名儒的影响。许多硕学名儒在私学中从事教学，他们的声望和教学水平吸引了大量学生前来学习。他们的教学方法和教学成果也为私学的繁荣起到了积极的推动作用。 此外，汉代社会对于文化教育的重视也是私学兴盛的原因之一。在当时，文化教育被认为是社会地位提升的重要途径，因此家长们愿意为子女接受良好的教育而送他们到私学学习。 最后，汉代私学教育的兴盛也与当时社会经济状况有关。汉代社会经济发展较为繁荣，人民有一定的经济实力去支持子女接受教育，这为私学的发展提供了必要的物质基础。 综上所述，汉代私学教育兴盛的原因是多方面的，包括官学的推动、硕学名儒的影响、社会对文化教育的重视以及经济状况等因素的综合作用。 。	b	b	b	b	b	b	why
书院教育与理学传播的结合,是在北宋中期儒学复兴运动中实现的,为了“能使学者视效而信从”,成为儒学发展的关键,因而理学自创立之初就十分重视师道,重视通过教育讲学在民间传道。而书院开放式的教学模式和倡导的自由讲学，为朱熹、吕祖谦等人的学术辩难提供了广阔的平台。南宋时期书院重视道德完善与人格教育，理学家制定了书院学规，如朱熹《白鹿洞书院揭示》，强调求学的目的在于正已、修身，而非追求功名利禄。理学家的“弘教化”和“广设庠序之教”,使人才“继踵而出”,更重要的是可以“正以民心”,以达太平盛世之目的,于是官府大力支持书院建设,并逐渐将其纳入官办学校系统。摘编自王晓龙《宋代书院教育》	根据材料三并结合所学知识，概括宋代理学与书院教育的关系。	关系在于书院教学的模式和特点推动了理学发展，书院的教育理念与理学家的价值理念相近，理学传播为书院教育的发展创造了条件，理学通过书院的传播与政治结合，成为官方正统哲学思想。	宋代理学与书院教育相互促进，书院为理学家提供了学术交流的平台，有助于传播和推广理学。理学家在书院中进行辩论和发表，推动了儒学的发展，并通过制定书院学规，塑造了当时知识分子的精神面貌和道德修养，扩大了理学的影响力。书院教育为理学的传播和发展提供了重要支持，促进了理学在宋代的繁荣。	宋代理学与书院教育的关系密切，书院的教学模式和自由讲学为理学家提供了学术辩难平台，理学家们也积极参与书院的教学活动，制定书院书学规，推动了书院建设发展。由此可见，宋代理学与书院教育相互促进，共同推动了中国古代教育的发展。	a	a	宋代理学与书院教育的关系是紧密的，尤其是在北宋中期的儒学复兴运动中。理学家们认为，通过教育和讲学来传播儒学的道德和哲学观念是非常重要的。为了实现这一目标，书院的开放式教学模式和自由讲学的精神为学者们提供了一个辩论和交流思想的平台。朱熹和吕祖谦等理学家就是在这样的环境中发展和推广他们的学说。 在南宋时期，书院教育更加强调道德完善和人格教育，理学家们制定了学规，如朱熹的《白鹿洞书院揭示》，强调求学的目的在于修身和正己，而不是单纯追求功名利禄。这种教育理念使得书院成为理学思想的重要传播和实践场所。 宋代理学家通过在书院中弘教化和广设教，培养了大量的有道德修养和学识的人才，这些人才不仅服务于朝廷，也能够影响民众，推动社会的和谐与进步。因此，官府对书院的支持和将其纳入官办学校系统，是宋代理学与书院教育关系的又一体现。 总之，宋代理学与书院教育的结合，不仅促进了理学的发展和传播，也为宋代社会的文化和…	宋代理学与书院教育的关系可以概括为相辅相成、相互促进。理学家们重视通过教育讲学在民间传道，书院开放式的教学模式和自由讲学为理学家们学术辩难提供了平台。书院重视道德完善与人格教育，理学家们强调求学的目的在于正已、修身，而非功名利禄。理学家们的“弘教化”和“广设庠序之教”培养了人才，使人才“继踵而出”，同时也可以“正以民心”，以达太平盛世之目的。由于官府大力支持书院建设并将其纳入官办学校系统，理学与书院教育在宋代共同推动了儒学的复兴和传播，对社会的稳定与发展起到了积极的作用。 .	b	b	b	a	a	a	what
材料一宋元时期,北自朝鲜、日本,南至爪哇和苏门答腊,东起香料群岛,西至阿拉伯和东非,都有中国民间商船的频繁活动。到了明朝,朝廷通过海禁与朝贡制度相配合,形成非入贡没有贸易的局面。同时朝廷下令改造民间船只,“近海违式商船,皆令拆卸,以五六尺为度,官给印照,听其生理”。“禁民间用番香、番货。”在海禁政策下,一些中国南部沿海的商人,组成了武装贸易集团。当时郑芝龙海商集团“雄踞海上”,“独有南海之利”,“海舶不得郑氏令旗,不能往来”。清朝开海后，华商、华侨深入东南亚，形成了一个广泛的华人贸易网络。道光二年(1822年),晋商销售到俄国的茶叶贸易额达到万两白银。自1493年到1800年,世界白银产量的 43%～57%都流向了中国。材料二随着西方国家在亚洲贸易圈中角逐与建立统治区,原有的亚洲贸易格局已经被打破,许多东南亚国家被纳入西欧国家控制之下。1741年到1780年,平均每年从中国到达巴达维亚(…	根据材料并结合所学知识，概括明清时期对外贸易的特点。	特点在于实施朝贡贸易体系，禁止民间私自对外贸易，出现武装贸易集团，掌控对外贸易，在东南亚市场形成华人贸易网络，主导东南亚市场，商帮参与，获利丰厚，白银大量流入中国市场，推动海外贸易发展。	明清时期对外贸易的特点主要表现在以下几个方面：明朝时期实行海禁和朝贡制度，导致贸易往来受限，百姓不得出海从事贸易；清朝时期贸易往来频繁，涉及范围广泛；茶叶贸易成为最受欢迎的贸易项目，收益巨大。	明清时期对外贸易的特点主要体现在三个方面：首先，以官方贸易为主，私下贸易被严禁，只有通过官方渠道才能进行贸易活动；其次，形成了民间武装贸易集团，清政府开放海域后，华人贸易网络得以广泛发展；最后，对外贸易以商品出口为主，极少有进口，甚至是不进口的情况。	b	b	明清时期对外贸易的特点主要体现在以下几个方面： 1. 政策变化：明朝初期实行海禁政策，限制民间商船的活动，仅允许官方船只进行贸易。明末清初，海禁政策逐渐放宽，民间商船得以恢复贸易活动。清朝开海后，进一步开放了对外贸易，鼓励商人参与海外贸易。 2. 商船改造：明朝末年，朝廷下令改造民间船只，要求船只尺寸统一，并给予印照，限制了商船的自由。清朝则允许商船按照市场需求进行改造和扩大。 3. 商业集团的兴起：在明清时期，特别是清朝初年，出现了一些大型的商业集团，如郑芝龙海商集团，它们在南海贸易中占据了主导地位。 4. 贸易网络的扩展：清朝后期，华商、华侨在东南亚建立了广泛的贸易网络，形成了中国对外贸易的重要组成部分。 5. 贸易物品的变化：明清时期，中国对外贸易的主要商品包括丝绸、瓷器、茶叶等，而对外进口的商品则包括香料、药材、金属等。随着西方国家的崛起，中国的对外贸易格局发生了变化，特别是茶叶…	明清时期对外贸易的特点包括：朝廷实行海禁政策和朝贡制度，限制民间商船活动，只有入贡国家才能进行贸易；朝廷改造民间船只，限制民间贸易活动；南部沿海商人组成武装贸易集团，如郑芝龙海商集团；清朝开海后，华商、华侨深入东南亚，形成华人贸易网络；世界白银流向中国，中国对外贸易占据重要地位；随着西方国家在亚洲贸易圈中角逐，原有亚洲贸易格局被打破，中国对外贸易受到影响，华茶出口逐渐下降。 。	a	a	b	a	a	b	what
材料一宋元时期,北自朝鲜、日本,南至爪哇和苏门答腊,东起香料群岛,西至阿拉伯和东非,都有中国民间商船的频繁活动。到了明朝,朝廷通过海禁与朝贡制度相配合,形成非入贡没有贸易的局面。同时朝廷下令改造民间船只,“近海违式商船,皆令拆卸,以五六尺为度,官给印照,听其生理”。“禁民间用番香、番货。”在海禁政策下,一些中国南部沿海的商人,组成了武装贸易集团。当时郑芝龙海商集团“雄踞海上”,“独有南海之利”,“海舶不得郑氏令旗,不能往来”。清朝开海后，华商、华侨深入东南亚，形成了一个广泛的华人贸易网络。道光二年(1822年),晋商销售到俄国的茶叶贸易额达到万两白银。自1493年到1800年,世界白银产量的 43%～57%都流向了中国。材料二随着西方国家在亚洲贸易圈中角逐与建立统治区,原有的亚洲贸易格局已经被打破,许多东南亚国家被纳入西欧国家控制之下。1741年到1780年,平均每年从中国到达巴达维亚(…	根据材料二并结合所学知识，说明明清时期“许多东南亚国家被纳入西欧国家控制之下”的原因。（4分)	原因在于新航路开辟后西欧国家纷纷在东南亚建立殖民地并与东南亚地区建立了直接的贸易联系，工业革命后西欧国家凭借工业革命带来的强大经济和军事实力将越来越多的东南亚地区纳入了资本主义世界市场之中，明清政府长期实施闭关锁国政策忽视海外贸易的重要性丧失了对外贸易的主动权给西欧国家以可乘之机。	在明清时期，许多东南亚国家被纳入西欧国家控制之下的原因有几个方面。首先，明清时期政府实行了海禁制度，主动退出市场，导致东南亚地区的贸易活动受到影响。其次，西方国家开辟了新航路，促进了殖民运动的展开，使他们在东南亚地区建立了统治区。此外，明清时期中国综合国力下降，逐步不如西方国家，使得西方国家在亚洲贸易圈中开始角逐，最终建立了统治地位。以上种种因素共同作用，导致了明清时期许多东南亚国家被西欧国家控制的局面。	在明清时期，许多东南亚国家被纳入西欧国家控制之下的原因是多方面的。首先，西方国家在亚洲贸易图中角逐，竞相建立统治区，以获取更多的贸易利益。其次，亚洲贸易格局被打破，东南亚国家的政治和军事实力相对较弱，难以抵抗西欧国家的侵略。因此，西欧国家通过武力、贸易和外交手段，逐渐控制了许多东南亚国家，成为这些地区的主要统治者。	a	a	明清时期，“许多东南亚国家被纳入西欧国家控制之下”的原因主要是由于西方国家在亚洲贸易圈中进行了激烈的角逐，并最终在军事、政治和经济上建立了统治。以下是几个关键因素： 1. 军事力量的增强：随着工业革命的推进，西方国家特别是英国、荷兰、葡萄牙等在军事技术上取得了显著进步，拥有了更强大的军舰和火炮，这使得他们能够在海上对抗东方国家的商船，并在必要时进行军事干预。 2. 经济需求和市场扩张：西方国家对亚洲的商品，如茶叶、丝绸、香料等，需求巨大。为了满足这些需求，他们需要在亚洲建立稳定的贸易网络和控制权，以确保资源的稳定供应。 3. 殖民主义的兴起：随着西方国家在亚洲的经济和军事力量的增强，他们开始寻求在亚洲建立殖民地，以便更有效地控制资源和市场。东南亚的许多国家因为地理位置的优势和资源丰富，被西方国家视为理想的殖民地。 4. 政治和外交策略：西方国家通过外交手段，如签订不平等条约，迫使东南亚国…	根据材料二以及所学知识，明清时期许多东南亚国家被纳入西欧国家控制之下的原因主要有以下几点： 首先，西欧国家在亚洲贸易圈中角逐与建立统治区，通过殖民扩张等手段逐渐控制了东南亚国家。西欧国家在军事、经济和技术上的优势使他们能够通过武力或者经济压力迫使东南亚国家接受其控制。 其次，西欧国家的贸易策略也对东南亚国家的独立性构成了威胁。随着西方国家的崛起和扩张，它们在东南亚地区建立了贸易殖民地，并通过控制贸易路线和资源瓜分等手段，逐渐削弱了东南亚国家的经济独立性和主权。 此外，东南亚国家在面对西欧国家的压力时，由于地理位置、政治体制以及军事力量等方面的原因，缺乏足够的抵抗能力，使其逐渐被西欧国家所控制。 综上所述，明清时期许多东南亚国家被纳入西欧国家控制之下的原因是西欧国家强大的军事和经济实力，以及东南亚国家的弱势地位和缺乏足够的反抗能力所致。	a	b	b	a	a	a	why
材料一宋元时期,北自朝鲜、日本,南至爪哇和苏门答腊,东起香料群岛,西至阿拉伯和东非,都有中国民间商船的频繁活动。到了明朝,朝廷通过海禁与朝贡制度相配合,形成非入贡没有贸易的局面。同时朝廷下令改造民间船只,“近海违式商船,皆令拆卸,以五六尺为度,官给印照,听其生理”。“禁民间用番香、番货。”在海禁政策下,一些中国南部沿海的商人,组成了武装贸易集团。当时郑芝龙海商集团“雄踞海上”,“独有南海之利”,“海舶不得郑氏令旗,不能往来”。清朝开海后，华商、华侨深入东南亚，形成了一个广泛的华人贸易网络。道光二年(1822年),晋商销售到俄国的茶叶贸易额达到万两白银。自1493年到1800年,世界白银产量的 43%～57%都流向了中国。材料二随着西方国家在亚洲贸易圈中角逐与建立统治区,原有的亚洲贸易格局已经被打破,许多东南亚国家被纳入西欧国家控制之下。1741年到1780年,平均每年从中国到达巴达维亚(…	根据材料并结合所学知识，简析明清对外贸易政策对今天的启示。	启示为充分掌握国际贸易规则，积极参与海外贸易竞争，结合本国经济发展水平，以国家利益为出发点，制定适宜的对外贸易政策。	明清时期的对外贸易政策为今天提供了一些启示。首先，促进与海外的经济交往有利于发展经济，这一点在今天仍然具有重要意义。其次，开放国门能够促进文化交流和商品交流，有利于增进各国之间的理解和合作。最后，打开完成亚洲贸易格局，使中国商品走向世界，这也为今天的国际贸易提供了借鉴。因此，明清时期的对外贸易政策对今天的国际经济合作仍然具有启示意义。	明清时期对外贸易政策的启示是，今天我们应该坚持改革开放，打开国门，积极参与国际贸易。政府应支持和扶持民间贸易，推动中国产品走出国门，走向世界。这样可以促进国内经济发展，提升国际竞争力，实现经济持续增长。	b	b	明清时期的对外贸易政策体现了中国封建社会的特点，包括中央集权的特性和对外开放与封闭的矛盾。明朝初期，中国的对外贸易非常活跃，商船遍布亚洲各地，但随着朝廷实施海禁政策，民间贸易活动受到了限制。明朝末年和清朝初期，海禁政策导致了对外贸易的进一步收缩，商船数量大幅减少，贸易活动受到严格控制。 然而，随着清朝开海政策的实施，华商和华侨在东南亚的贸易活动得到了恢复和发展，形成了广泛的华人贸易网络。明清时期的对外贸易政策对今天有以下几点启示： 1. 对外开放与封闭的平衡：明清时期的对外贸易政策体现了封建社会对外开放与封闭的矛盾。今天的国家在制定对外贸易政策时，需要平衡开放与控制的关系，确保经济的健康发展和国家安全的同时，保持与世界的开放交流。 2. 促进贸易的自由化：明清时期的海禁政策限制了民间贸易的活跃，导致贸易活动的减少。今天，鼓励贸易的自由化和便利化是促进国际贸易发展的重要途径，可以提高贸易效…	根据材料及所学知识，可以看出明清时期对外贸易政策主要以海禁和朝贡制度为主，限制了民间商船的活动，导致一些商人组成武装贸易集团进行贸易活动。而清朝开放海禁后，华商、华侨深入东南亚，形成了一个广泛的华人贸易网络。这些历史事件给今天的启示是，开放贸易、加强与世界各国的贸易往来是促进经济发展的重要途径。保护主义的贸易政策会限制经济的发展，而开放贸易有助于吸引外资、促进技术交流和经济发展。同时，要通过贸易合作建立互信关系，避免一国单方面限制对外贸易，遵守国际贸易规则，实现共赢互利的贸易关系。	a	b	b	a	b	b	what
材料一由于中国的国情，中国战场实际上分为两个相互独立，同时在战略上相互支撑的战场。这种格局贯穿于战争始终，是中国抗日战场在极其困难情况下得以保持完整的前提条件，也是中国抗日力量,特别是中国共产党努力的结果。正是因为如此,中国战场才能在自身贫弱、外援不足的情况下为世界反法西斯战争作出战略性的贡献,使反法西斯盟国世界战略能在中国战场的牵制下得以完成。摘编自韩永利《浅论中国在第二次世界大战中的战略地位》材料二历史事实证明,如果没有正面战场多次大规模作战,吸引并杀伤大量日军,敌后战场的开辟将是艰难的；同样，如果没有八路军、新四军和广大人民武装在敌后战场对日、伪军的有力牵制、打击,正面战场所承受的军事压力将更大,有些战役失败得也将更惨。……抗战初期国民党正面战场的主战场作用是明显的，战略相持和战略反攻阶段敌后游击战场的关键作用也是明显的。摘编自曲青山《在抗战纪念活动中需把握好的几个重大问题》	根据材料一、二，概括指出二战期间中国战场的特点。	特点在于自身贫弱、外援不足，形成相互独立又相互支持的两个战场，中国共产党起到了建设性的作用，抗战初期主战场是国民党领导的正面战场，战略相持和战略反攻阶段敌后战场起到关键性作用。	二战期间中国战场的特点是正面战场和敌后战场相互独立相互支撑。在不同历史时期，正面战场和敌后战场均发挥了自身作用，二者缺一不可。	二战期间中国战场的特点主要包括：自身条件差，外援帮助有限；形成了两个独立但互相支持的战场；共产党在战场中发挥了建设性作用；抗战初期主要由国民党领导；随着战争进入战略相持和反攻阶段，敌后战场的地位变得至关重要。	b	b	根据材料一和二，二战期间中国战场的特点主要体现在以下几个方面： 1. 双重战场格局：中国战场分为两个相互独立但战略上相互支撑的战场，即正面战场和敌后战场。这种格局是中国抗日战争得以持续和有效的关键因素。 2. 国内外战略贡献：尽管中国在战争初期面临着自身贫弱和外援不足的情况，但中国战场的战略性贡献对于世界反法西斯战争的进程至关重要。正面战场和敌后战场的双重打击对日军造成了巨大的损失，帮助了世界反法西斯盟国的战略行动。 3. 相互依存的战略作用：正面战场和敌后战场在抗战中的作用是相互依存的。正面战场的主战场作用在抗战初期尤为明显，而战略相持和战略反攻阶段，敌后游击战场的关键作用则变得更加重要。两者共同作用，形成了对日军的全方位打击。 4. 人民战争的重要性：材料二强调了八路军、新四军和广大人民武装在敌后战场的作用，他们对日、伪军的牵制和打击极大地减轻了正面战场的压力，有时甚至决定了战役的成…	中国战场在二战期间具有两个相互独立但互相支撑的战场格局，即正面战场和敌后游击战场。正面战场主要由国民党军队承担，通过大规模作战吸引和杀伤日军；而敌后游击战场则由八路军、新四军和广大人民武装承担，对日、伪军展开有力牵制和打击。这种战略性的分工使得中国战场能够在困难情况下保持完整，为世界反法西斯战争作出贡献，并在牵制下支持盟国的战略目标。。	a	b	b	a	b	b	what
材料一由于中国的国情，中国战场实际上分为两个相互独立，同时在战略上相互支撑的战场。这种格局贯穿于战争始终，是中国抗日战场在极其困难情况下得以保持完整的前提条件，也是中国抗日力量,特别是中国共产党努力的结果。正是因为如此,中国战场才能在自身贫弱、外援不足的情况下为世界反法西斯战争作出战略性的贡献,使反法西斯盟国世界战略能在中国战场的牵制下得以完成。摘编自韩永利《浅论中国在第二次世界大战中的战略地位》材料二历史事实证明,如果没有正面战场多次大规模作战,吸引并杀伤大量日军,敌后战场的开辟将是艰难的；同样，如果没有八路军、新四军和广大人民武装在敌后战场对日、伪军的有力牵制、打击,正面战场所承受的军事压力将更大,有些战役失败得也将更惨。……抗战初期国民党正面战场的主战场作用是明显的，战略相持和战略反攻阶段敌后游击战场的关键作用也是明显的。摘编自曲青山《在抗战纪念活动中需把握好的几个重大问题》	根据材料一、二并结合所学知识，比较说明中国两个战场之间的主要不同。	不同在于领导政党不同，正面战场由国民党领导，共产党领导了敌后战场，抗战方针不同，正面战场主要依赖政府和军队，敌后战场贯彻人民战争路线，抗战方式不同，正面战场以阵地战为主，敌后战场多表现为游击战、运动战，抗战效果不同，初期中国军队虽在正面战场然而英勇抵抗但丧师失地一溃千里，敌后战场虽装备低劣但顽强抵抗成为抗战中后期的中流砥柱。	根据材料一、二并结合所学知识，可以看出中国两个战场之间存在着明显的不同。首先，一个战场伤亡惨重，自身贫弱，外援不足，作战规模大，伤亡多，而另一个战场则是为另一场战场开辟道路。这表明两个战场在战争形势、作战条件和战略目标上存在着巨大差异。 其次，一个战场注重攻击敌人内部，国民党在正面战争场的作用明显，战略相持和战略反攻阶段敌后游击队战场作用明显。这说明两个战场在作战策略、军事部署和战术运用上也有着显著的不同之处。在整个抗战过程中，两个战场的作用相辅相成，共同为抗日战争的胜利作出了重要贡献。	根据材料一、二并结合所学知识，可以看出中国两个战场之间存在主要的不同。在正面战场，国民党占据主导地位，而在敌后战场，共产党则扮演主要角色。此外，正面战场主要是阵地战的形式，而敌后战场则以游击战为主要方式。在目的上，正面战场的主要任务是保卫国土，而敌后战场的目的则是破坏敌人的后勤，对敌后方进行牵制和打击。这些不同点体现了在中国抗日战争中两个战场的不同战略和战术选择。	b	b	根据材料一和二，我们可以了解到中国在抗日战争中的战场分为两个相互独立但战略上相互支撑的部分：正面战场和敌后战场。正面战场主要指的是国民党军队在华北、华东、华南等地与日军正面交战的战场，而敌后战场则是指在敌占区内，中国共产党领导的八路军、新四军以及广大人民武装在敌后开展的游击战和游击战场。 正面战场和敌后战场之间的主要不同在于战术、战略和影响力方面： 1. 战术和战略： 正面战场的战术通常是正面作战，依赖于传统的军事战术和战略，如阵地防御、攻坚战等。而敌后战场则采用游击战术，通过灵活机动、灵活运用各种战术，如伏击、破坏、游击等，来对日军进行打击和消耗。 2. 影响力： 正面战场的主要作用是吸引和消耗日军的主力，通过正面战场的作战，能够直接对日军造成伤害，减少其对中国内地的威胁。敌后战场则在战略上起到牵制和打击的作用，通过在敌后开展游击战，能够削弱日军的后方支持，破坏其补给线，减轻正面战场的…	根据材料一和材料二的描述以及所学知识，可以看出中国战场实际上分为国民党正面战场和共产党敌后游击战场两个相互独立但相互支撑的部分。主要不同点包括： 1. 作战方式：国民党正面战场主要采取集中兵力、正面作战的方式，与日军进行大规模的正面对抗；而共产党敌后游击战场则主要采取游击战、游击打击的方式，通过小规模、分散的战斗对日军、伪军进行牵制和打击。 2. 作战目标：国民党正面战场的主要作战目标是争夺和保卫重要城市、交通要道等地；而共产党敌后游击战场的主要作战目标是在敌后地区组织抗日根据地，动员群众参与游击战。 3. 对外援助的依赖程度：国民党正面战场由于作战方式的特点，更依赖外援（如美援）来支持作战；而共产党敌后游击战场则更侧重于依靠本身动员的力量和群众支持。 综上所述，中国两个战场在作战方式、作战目标和对外援助依赖程度上存在较大不同。这种互相支撑的战略部署在抗日战争中发挥了重要作用，保持了中国…	a	b	b	b	b	b	what
材料一由于中国的国情，中国战场实际上分为两个相互独立，同时在战略上相互支撑的战场。这种格局贯穿于战争始终，是中国抗日战场在极其困难情况下得以保持完整的前提条件，也是中国抗日力量,特别是中国共产党努力的结果。正是因为如此,中国战场才能在自身贫弱、外援不足的情况下为世界反法西斯战争作出战略性的贡献,使反法西斯盟国世界战略能在中国战场的牵制下得以完成。摘编自韩永利《浅论中国在第二次世界大战中的战略地位》材料二历史事实证明,如果没有正面战场多次大规模作战,吸引并杀伤大量日军,敌后战场的开辟将是艰难的；同样，如果没有八路军、新四军和广大人民武装在敌后战场对日、伪军的有力牵制、打击,正面战场所承受的军事压力将更大,有些战役失败得也将更惨。……抗战初期国民党正面战场的主战场作用是明显的，战略相持和战略反攻阶段敌后游击战场的关键作用也是明显的。摘编自曲青山《在抗战纪念活动中需把握好的几个重大问题》	综合上述材料并结合所学知识,我们应当以什么样的正确态度评价抗战期间国民政府领导的正面战场的抗战。(4分)	态度为历史地看待，不戴有色眼镜加以全盘否定，全面地看待，既不否定正面战场初期做出的历史性贡献，也不否定其后期的消极影响。	镇压等行为。要以客观的态度看待国民政府领导的正面战场抗战，承认他们在抗战中所做出的贡献，比如组织抗战、筹措军费、支援前线等方面的努力。同时也要反对国民党在抗战期间对中共和爱国人士的迫害和镇压等不正当行为。要在评价中保持辩证的态度，既肯定其积极作用，也批评其不当行为，以更客观的眼光看待国民党在抗战中的表现。	国民政府领导的正面战场抗战取得了重要的胜利，这是因为各方团结一致，共同努力的结果。国民党政府在此过程中发挥了重要作用，尽管也存在着一些问题和不足，但在整体上为抗战胜利做出了积极贡献。我们应当客观看待历史，正确认识国民政府在抗战中的作用，同时也应当尊重其他参与抗战的力量，共同铭记这段艰苦卓绝的历史。	a	a	综合上述材料，我们应当以平衡和全面性的态度评价抗战期间国民政府领导的正面战场的抗战。正面战场在抗战初期确实承担了主战场的作用，国民党军队在华北、华东、华南等地与日军进行了激烈的正面对抗，取得了一系列的战役胜利，如武汉会战、长沙会战等，这些胜利对于抵御日军的侵略和巩固国民政府的统治具有重要意义。 然而，随着战争的发展，正面战场也面临着日益增长的军事压力和物资短缺的问题。正如材料二所述，如果没有八路军、新四军和广大人民武装在敌后战场的有力牵制和打击，正面战场所承受的军事压力将更大。因此，我们应当认识到，正面战场和敌后战场是相互依存、相互补充的，两者共同构成了中国抗日战争的完整战略格局。 在评价抗战期间国民政府领导的正面战场的抗战时，我们应该看到其在抗日战争中的重要作用，同时也要看到其在战争中存在的局限性和挑战。正面战场的抗战是中国抗日战争的主战场，但它并不是唯一的战场，也不是唯一的抗战形式。…	在评价抗战期间国民政府领导的正面战场的抗战时，我们应该以客观、全面的态度来看待。国民政府在抗战期间在正面战场上承担了重要的作战任务，起到了一定的作用，特别是在抗战初期对日军的主要抵抗力量。然而，也不能忽视国民政府在战争中存在的一些问题和不足，如统帅混乱、对军事战略的错误判断等。同时，要认识到在中国抗战中，国共两党在正面战场和敌后游击战场上的合作是取得抗战胜利的重要因素之一，两者相互支撑、相互配合才最终取得了抗战的胜利。因此，我们评价国民政府领导的正面战场的抗战时，应该既肯定其在抗战中的作用，也要客观地指出其中存在的问题和不足，同时强调国共合作在抗战中的重要性。	b	b	b	b	a	a	how
材料一先秦儒学是在特定的时代气候之下，植根于前代文化的丰厚土壤而成长起来的。它既承担着前代文化传统传承接续的历史使命,也必须回答当时社会所面临的实际问题。春秋时代剧烈变化着的中国社会,在政治、经济、军事、伦理、文化等方面都向当时的思想家们提出了许多迫切需要解决的现实问题。这些问题大多是由于生产力发展到一定水平之上以后，人群之间的社会关系、社会交往、社会组织日趋复杂化而引发出来的，而其核心问题是社会政治与伦理道德问题。这也是先秦儒学所要着重解决的问题。摘编自徐克谦《先秦儒学及其现代阐释》材料二韩非子曾说：“世之显学，儒、墨也。”然而，实际情况却复杂得很。孔子为了宣传自己的学术理想,寄希望于周游列国,却以失败告终;孟子时代,则是“杨朱、墨翟之言盈天下”;秦始皇更是实行了“焚书坑儒”的决策。虽然，汉初儒学偶有机会露面，但很快就被道、法强势逼退，至汉武帝时，这一局面才逐渐被打破。公元前 134 …	根据材料一并结合所学知识，说明先秦儒学产生的背景。	背景为春秋战国时期社会逐渐从奴隶社会向封建社会转型，诸侯国之间兼并战争不断，生产力发展封建土地私有制逐步确立，新兴地主阶级崛起，私学兴起“学在官府”的局面被打破，作为独立文化人阶层的“士”逐渐崛起。	先秦儒学产生的背景是随着社会发展，阶级关系开始发生变化。当时，生产力发展到了一定水平以上，人群间的社会关系、社会交往、社会组织日趋复杂化。这种社会动荡使得社会政治和伦理道德问题迫切需要解决。因此，先秦儒学应运而生，试图通过建立道德伦理体系来解决社会问题，维护社会秩序。	这导致了先秦儒学的产生。在那个时代，人们开始思考如何建立一个和谐稳定的社会秩序，如何培养有德行的人才，如何规范人与人之间的关系。因此，儒家学派应运而生，试图通过道德教育和人伦关系的规范来解决社会上的种种问题。同时，先秦时代也是一个思想百花齐放的时期，各种思想流派纷纷涌现，儒家作为其中的一支，在这种激烈的思想竞争中逐渐形成并得到发展。总的来说，社会变革的需求和思想交流的激烈使得先秦儒学得以崛起并蓬勃发展。	a	a	先秦儒学产生的背景是复杂的，涉及到社会政治、经济、军事、伦理、文化等多个方面。在春秋战国时期，中国社会经历了剧烈的变革，这一时期的社会关系、社会交往、社会组织日趋复杂化。随着生产力的发展，社会问题日益凸显，特别是社会政治与伦理道德问题成为人们关注的焦点。 在这样的背景下，先秦儒学应运而生，它不仅承担着前代文化传统的传承接续的历史使命，还必须回答当时社会所面临的实际问题。儒学通过强调仁、义、礼、智、信等道德规范，试图解决社会的不稳定和混乱，寻求社会和谐与秩序的实现。 然而，儒学在当时并非占据主导地位。如韩非子所说，儒学与墨家并列为世之显学，但实际上，儒学面临着来自其他学派的竞争，以及政治上的压力。孔子周游列国宣传自己的学术理想未能成功，孟子时代儒学也面临着杨朱、墨翟等学派的挑战。秦始皇的焚书坑儒政策更是对儒学造成了严重打击。 直到汉初，儒学才有机会露面，但很快被道、法等其他学派所压迫。直到…	先秦儒学产生的背景主要是在春秋时代剧烈变化的中国社会中。在这个时期，社会的政治、经济、军事、伦理、文化等方面都面临着许多现实问题，主要是由于生产力发展到一定水平后，社会关系、社会交往、社会组织变得日益复杂化所引发的。这些问题的核心是社会政治与伦理道德问题，需要思想家们来解决。先秦儒学植根于前代文化的丰厚土壤中成长起来，承担着前代文化传统传承接续的历史使命，同时也致力于回答当时社会面临的实际问题。在这种背景下，先秦儒学逐渐形成并发展起来，成为当时思想领域的重要流派。 。	b	a	a	b	a	b	what
西周时期,由于是以周王朝为核心的部族联盟灭掉了商朝,且各地经济、文化发展水平不同,由此形成了以“封邦建国,屏藩周室”为核心的分封思想。全国各地被成百上千个邦国所分割，他们虽然名义上有一个共主——周天子，可在邦国之内却独立行使统治权，兵役、劳役等事项周天予无权过问。而秦末汉初之时形成的新型分封思想,则是主张分封制、郡县制并存的一种政权构建方式。分封的诸侯国不再像西周的邦国那样保持行政上的独立完整性，总是或多或少地要受中央政权的干预与制约。此外，新型分封思想主张下的诸侯分封仅限于同姓子弟，而西周时期旧的分封思想则除此之外，还有许多功臣、先代贵族后裔。几十年后，“七国之乱”爆发，分封的诸侯国由此经历了大的转变。——摘编自刘文超《试论秦末汉初的新型分封思想》	根据材料一并结合所学知识,说明西周的分封制与汉初的封国制有何异同。	目的都是为了调整中央与地方的关系巩固王朝统治，都以分封同姓子弟为主，都对中央政府统治造成一定冲击，西周分封的诸侯国在行政上具有独立完整性，而汉初的诸侯国受到了一定制约，西周分封对象是王族、功臣和先代贵族，而汉初分封的异姓王逐渐被刘姓子弟取代，西周后期随着诸侯国力量增强，周王室权威下降，而汉朝通过推恩令等措施使封国力量得到削弱，加强了中央集权。	。同：西周时期分封制和汉初封国制都是为了维护中央集权，加强对地方的控制。在两种制度下，诸侯国都要向中央朝廷朝贡，接受中央的统治和领导。另外，两种制度下的诸侯国都有一定的自治权，可以管理自己的土地和人民，但必须遵守中央的政策和法令。	的统治，实现国家统一的目标。在分封制和封国制下，中央政权都能通过封爵来控制地方豪强，巩固自身的统治地位。封爵制度也有利于激励地方豪强为中央政权效力，保持国家的稳定和统一。因此，无论是西周的分封制还是汉初的封国制，都是为了加强中央集权，确保国家政权的稳定和统一。	b	a	西周的分封制与汉初的封国制在以下几个方面有异同： 1. 分封对象的不同： - 西周时期，分封对象主要是功臣、先代贵族后裔以及周王朝的同姓子弟。这种分封方式旨在巩固周王朝的统治基础，通过对功臣的封赏来稳定他们的忠诚，同时也确保了贵族阶层的利益。 - 汉初的封国制则主要限于刘邦的同姓子弟，即皇族成员。这种分封方式更加注重中央集权的稳固，通过控制封国的分配来加强中央对地方的控制力。 2. 行政独立性： - 西周的邦国在行政上相对独立，周天子对邦国的兵役、劳役等事项基本无权过问。邦国的独立性较强，形成了一种相对松散的分封体系。 - 汉初的封国制则要求封国要与中央政权保持一定的联系和依赖，中央政权对地方的干预和制约更加明显。郡县制的建立进一步加强了中央对地方的控制。 3. 分封的目的和影响： - 西周的分封制旨在巩固周王朝的统治基础，通过分封来稳定周边的邦国，减少对周王朝的威胁。 - 汉初的封国制…	西周的分封制与汉初的封国制在实施方式和理念上存在一些异同之处。首先，西周时期的分封制是基于周天子对各地邦国的封爵，各邦国独立行使统治权，周天子无法干预其兵役、劳役等事务。而汉初的封国制则是中央政权对诸侯国实行干预和制约，诸侯国不再完全独立，需要遵循中央政府的指挥。其次，西周时期的封爵除了同姓子弟之外，还包括功臣、先代贵族后裔等，而汉初的封国制则限定封国只能是同姓子弟，排除了其他因素的干扰。最后，由于汉初封国制的实施，诸侯国之间的关系更加紧密，中央政权对地方的控制也更加强大，这与西周时期的分封制有所不同。 总的来说，西周的分封制更加注重地方各邦国的独立性和自治性，而汉初的封国制则更加强调中央政权的统一性和控制力。两种制度都是为了维护国家的稳定和统一，但在实施方式和理念上存在一些差异。	a	b	b	a	b	a	what
唐人陆赞论及租庸调制时说:“丁男一人,授田百亩,但岁纳租税二石而已。言以公田假人,而收其租入,故谓之租”。租庸调征缴只以丁身为依据,而不计其余,并不考虑农户的实际占有土地情况,其弊端是十分明显的。而且租庸调的征收额由唐朝统一确定,长期以来一直保持不变,虽然有其稳定性,但其不能依据社会经济发展形势的变化而做出调整,有其不能根据土地实际占有状况的变化而主动调整,存有明显的僵化缺陷。唐制规定贵族、官僚户和其他特殊身份之人可以免除租调徭役,而一些人庇荫在这些特权户之下,逃税、避税,使国家征税额也随之减少。公元780年，租庸调制因为实际上的完全废坏而被两税法所取代。	根据材料一并结合所学知识，指出唐代租庸调制推行的基础，并分析租庸调制废坏的原因.	基础是均田制，原因在于租庸调制与均田制日益脱节，租庸调制长期僵化，逃税避税现象严重。	唐代租庸调制的实施基础主要是以丁身为依据，然而这种做法并未考虑到农户的实际占有情况。另外，征收额也不能根据社会经济发展的变化进行调整，导致了明显的僵化缺陷。此外，租庸调制的机制不够周全，容易让人逃税、避税，使征税额不断减少。 由于以上原因，租庸调制逐渐废坏。在实施过程中没有考虑农户的实际情况，导致了不公平现象的出现。此外，征收额的僵化也使得该制度无法适应社会经济发展的变化。机制不够完善也导致了逃税、避税等问题的出现，最终使得征税额不断减少，影响了国家财政收入。因此，租庸调制最终废坏的原因主要是由于其基础不够稳固，机制不够完善，无法适应社会经济发展的需要。	唐代租庸调制推行的基础是以丁身为依据，统一确定征税额，不计其余。然而，贵族、官僚户和其他特殊身份的人可以免除租调徭役，一些人庇荫在这些特权户下逃避徭役，使国家税收减少，最终导致租庸调制完全废坏。	a	a	唐代租庸调制推行的基础是基于土地所有权与耕种权的分离。唐朝实行的租庸调制是基于丁男（即成年男性）为单位的土地征税制度。每个丁男被授予一定数量的土地（通常是百亩），但他只需向国家缴纳固定数量的租税（二石），而不需要为国家提供庸调（即劳动力）。这种制度的核心在于国家通过公田的形式来征收租税，而不直接依赖于农户的实际土地占有情况。 租庸调制废坏的原因主要有以下几点： 1. 不考虑实际土地占有：租庸调制只依据丁男的数量来征税，而不考虑农户实际占有的土地数量和质量，这导致了征税不公平，无法准确反映农户的经济能力。 2. 缺乏灵活性：租庸调的征收额由唐朝统一确定，长期保持不变，这使得制度无法适应社会经济的发展变化，也无法根据土地实际占有状况的变化进行调整，导致了制度的僵化。 3. 特权制度的存在：唐代规定贵族、官僚户和其他特殊身份的人可以免除租调徭役，这导致了一些人庇荫在这些特权户之下，逃税、避税，…	唐代租庸调制的推行基础在于以丁身为征税依据，统一确定征收额，并且允许特权户免除租调徭役。这种制度在一定程度上确保了财政收入的稳定性，但也存在明显的缺陷。首先，租庸调制没有考虑农户的实际占有土地情况，导致有些农户负担过重，有些则逃税避税，使国家征税额减少。其次，征收额长期不变，无法根据社会经济发展形势的变化进行调整，导致制度僵化，无法适应时代变革。另外，特权户的存在也使得一些人逃税，增加了国家财政的负担。综合来看，这些因素共同导致了唐代租庸调制的废坏。最终，公元780年，租庸调制被两税法所取代，以适应社会发展的需要。 。	a	b	b	a	a	a	why
材料一奏始皇三十三年(公元前 214年) “发诸尝述七人《迷离原有户籍而出外游食之民)、替婿、贾人…以熵造成”，在直抵阴山的地方置“四十四县”，又派蒙恬率兵三十万北没成狄。《史记·秦給皇本記》,材料二(汉元帝竞宁元年)正月,匈奴呼韩邪单于来朝,自言愿婚汉氏以自亲。帝以后宫良家子王婚字唱君赐单于。《资治通鉴》司马光·卷二十九	根据材料并结合所学知识，列举中国古代历代王朝管理边疆的措施。	战争、移民戍边、设置管理机构、和亲、羁縻政策、册封等。	元朝统一后，实施分区域管理，勇敢地突破自然地理限制，开放各省门户。	在中国古代历代王朝管理边疆的措施中，秦朝通过建设长城来抵御匈奴；汉朝则采取与少数民族结亲的方式，促进民族间的交流和融合；而宋朝则通过向其他国家提供财富并向他们称臣来维护边疆稳定。这些措施体现了古代王朝在处理边疆问题上的不同策略和手段。	b	b	根据材料一，秦始皇三十三年（公元前214年），秦始皇在直抵阴山的地方设立了“四十四县”，并派蒙恬率领三十万大军北伐，消灭了狄族。这表明秦朝采取了设立行政区划和军事征伐的措施来管理边疆。 在材料二中，汉元帝竞宁元年（公元前58年），匈奴的呼韩邪单于来朝，表示愿意与汉朝结成婚姻关系以增进亲善。汉元帝接受了这一提议，并将良家子王嫁给了呼韩邪单于。这一措施体现了汉朝通过和亲等外交手段来稳定边疆关系。 结合所学知识，中国古代历代王朝管理边疆的措施主要包括： 1. 行政区划：设立边疆地区的行政区划，如秦朝设立的“四十四县”，以便于统治和管理。 2. 军事征伐：通过军事力量来对抗边疆的敌对势力，如秦始皇时期的北伐。 3. 和亲：通过与边疆民族结成婚姻关系来增进亲善，如汉朝与匈奴的和亲。 4. 边防建设：修建城墙、堡垒等防御设施来加强边疆的防御能力。 5. 招抚纳入：吸引边疆地区的居民归附中央政府，通过…	根据材料一和材料二，中国古代历代王朝管理边疆的措施包括设立县治、派遣将军率兵北征、与邻国建立外交关系等。在秦朝时期，始皇帝派遣蒙恬率领大军北征，直抵阴山地区，设立四十四县来巩固边疆。而在汉朝时期，元帝通过外交手段与匈奴呼韩邪单于建立亲缘关系，通过婚姻来稳定边疆局势。除此之外，古代王朝还会修筑长城、设置关隘、派遣巡视使等措施来管理边疆。 。	a	b	b	a	b	b	what
材料三 宋朝先后与契丹族建立的辽、党项族建立的西夏、女真族建立的金长期并立。辽、西夏、金、大理等政权都吸收了中原王朝的政治制度、治理经验和文化。即使在局部政权割据、争战状态下，各民族间的交往交流交融也从没有中断过。	根据材料三结合所学知识,举例说明两宋时期少数民族政权吸收了中原王朝的政治制度、治理经验和文化的表现及影响。	表现在南北面官制、猛安谋克制顺应了北方民族交往交流交融的历史趋势，促进了民族交融，缓解了民族矛盾。	在两宋时期，少数民族政权吸收了中原王朝的政治制度、治理经验和文化，表现出了明显的影响。例如，西夏的政治制度与北宋十分相似，只是有些官职的叫法不同。而金的“猛安谋克”制中兵农合一与唐朝的制度有异曲共工之处。这些举措使少数民族的政权逐渐封建化，促进了民族交流与交融，也促进了各民族之间文化的交流与发展。这种吸收和融合的过程为统一的民族国家的建立打下了基础。	在两宋时期，少数民族政权吸收了中原王朝的政治制度、治理经验和文化，这在很多方面都有所体现和影响。首先，这种吸收促进了各民族间的友好往来，加强了彼此之间的交流和合作。例如，西夏政权吸收了宋朝的政治制度和治理经验，在政治上实行官制和科举制度，这有助于西夏国内的统一和稳定，也使得西夏与中原王朝之间的关系更加密切。 其次，这种交流也促进了思想文化的繁荣。少数民族政权吸收中原王朝的文化，使得各民族之间的文化交流更加频繁，文化也得到了更广泛的传播和发展。例如，金朝吸收了北宋的文化，使得金朝在文化上也有了一定的开展和繁荣，这对于促进各民族之间的文化交流起到了积极的作用。 最后，这种吸收也有利于各民族经济的发展。通过吸收中原王朝的治理经验和政治制度，少数民族政权能够更好地管理国家，促进国家的经济繁荣。例如，南宋政权吸收了北宋的治理经验，使得南宋在经济上有了更好的发展，国家的经济实力也得到了提升。 总的来…	a	a	在两宋时期，宋朝与辽、西夏、金等少数民族政权的并立，促使这些政权在政治制度、治理经验和文化上进行了大量的吸收和融合。以下是几个具体的例子： 1. 政治制度的吸收：辽朝在政治制度上吸收了宋朝的官僚制度，例如辽朝设立了“三省六部”的中央政府机构体系，这与宋朝的“六部”制度相似。同时，辽朝也采用了宋朝的科举制度，选拔官员，虽然有所不同，但体现了两者在官僚制度上的相互影响。 2. 治理经验的吸收：西夏在治理上吸收了宋朝的水利建设经验。西夏的水利工程，如引水灌溉、防洪等，受到了宋朝在这方面的影响。例如，西夏的引水工程在技术上与宋朝的水利工程有相似之处，体现了两者在治理经验上的交流。 3. 文化的吸收：金朝在文化上吸收了宋朝的书法、绘画、文学等多种艺术形式。金朝的书法家如赵孟頫等人，受到了宋朝书法大家如苏轼、黄庭坚等人的影响，金朝的绘画也融入了宋朝的山水画风格。文学上，金朝的诗人如杨万里的诗作也受到…	在两宋时期，少数民族政权吸收了中原王朝的政治制度、治理经验和文化体现在许多方面。一个明显的例子是辽、西夏、金等政权在治理上采用了类似中原王朝的官制和法律制度。例如，辽国实行了类似唐代的三省六部制度，西夏也设立了类似中原王朝的官职和官员选拔制度。这种制度的借鉴使得这些少数民族政权的组织更加规范和高效。 此外，少数民族政权还吸收了中原王朝的文化，如儒家思想、诗词文学等。例如，辽国皇帝耶律阿保机曾邀请华夏文化大师欧阳修、苏洵等人前往辽国传授文化知识，并在辽国内推广儒家经典。这种文化的传播不仅丰富了少数民族政权的文化内涵，也促进了各民族之间的文化交流和融合。 这些吸收中原王朝政治制度、治理经验和文化的举措，使得少数民族政权在两宋时期能够更好地治理自己的国家，促进了各民族之间的相互了解和融合，对当时的政治格局和文化传承都产生了积极的影响。 。	b	a	a	b	a	a	what
三省制形成于魏晋南北朝，确定于隋朝，完善于唐朝。三省制形成于魏晋南北朝，确定于隋朝，完善于唐朝。隋朝三省职责分工和运行机制并没有明确，而职责明确、运行协调的三省体制，是在唐朝才得以形成的。唐朝在中央完善三省六部制,三省即中书省、门下省和尚书省。中书负责草拟有关军国大事的诏旨;门下省是审署下达机构，有封驳之权，负责审查中书省起草的诏旨，如认为不当，可以驳回，此外，尚书省等各官署送呈的奏章,也由门下省先行审议驳正,门下省将审核意见提供给皇帝参考;尚书省主掌行政事务,负责执行政令,尚书省下设吏、户、礼、兵、刑、工六部,分掌全国各项政务。唐朝中书省的长官中书令、门下省的长官侍中和尚书省的长官尚书令都是宰相，三省相互牵制和监督，削弱了相权，保证了皇权的独尊。摘编自赵士祥《对唐朝三省六部制结构与特点的探讨》	根据材料一并结合所学知识，概括唐朝分权制的特点。	特点在于决策与行政分离，分工明确效率高，门下省处于枢纽地位，采取集体宰相制。	唐朝分权制的特点包括：使职责明确、运行协调；三省权力相互牵制和监督；削弱了相权；加强了中央集权，保证了皇权的独尊。	唐朝分权制的特点包括相互牵制和监督，削弱相权，保障皇权独尊；分权而治，提高了行政效率。	b	b	唐朝的分权制主要体现在其三省六部制中，形成了一个相互牵制和监督的体系，有效地削弱了宰相的权力，增强了皇权。具体来说： 1. 三省职责分工明确：中书省负责草拟诏令，门下省负责审查诏令并有驳回权，同时对尚书省的奏章进行初审，提供审核意见给皇帝；尚书省则负责行政事务的执行和全国各项政务的管理。 2. 六部分掌各项政务：尚书省下设吏、户、礼、兵、刑、工六部，每个部负责全国各项政务的具体管理。 3. 宰相制：中书令、侍中和尚书令都是宰相，但由于三省相互牵制，宰相的权力受到限制。皇帝可以从中书省、门下省和尚书省各选取宰相，形成了相互制衡的局面。 4. 皇权独尊：通过三省六部制的设置，皇帝能够直接或通过门下省的审核意见对宰相的决策进行影响和监督，从而维护了皇权的独尊地位。	唐朝分权制的特点包括三省六部制的建立和运行，三省相互制衡相互监督，削弱宰相相权，保证了皇权的独尊。中书省负责草拟军国大事的诏旨，门下省审署下达并审查诏旨，尚书省主掌行政事务并下设六部分掌各项政务。三省之间相互协调合作，确保政令的执行，避免权力过于集中于某一部门或个人，更好地维护皇权和国家稳定。。	a	a	a	a	b	a	what
独立战争后,各州从维护本州统治集团的利益出发,使得原来的邦联政府名存实亡、濒于瓦解，同时，以英国为首的国外列强对美国的独立耿耿于怀、虎视眈眈。美国宪政的奠基者们开始把孟德斯鸠的理论进一步系统化和美国化,确立了分权制衡的原则。1787年美国制宪会议召开之际,富足的资产阶级之间还没有形成共识,但是,当1786~1787年的谢斯起义威胁着他们的基本利益的时候,这种集团间的差异就被共识所取代了。美国宪法规定国会掌握立法权,不受行政机关的干预,同时对总统具有弹劾权。行政权由总统行使,由选民选举产生,只对选民负责,可以对国会通过的法案行使否决权。司法权由联邦最高法院以及国会随时下令设立的低级法院来行使,最高法院有终审权,联邦法院的法官均由总统征得参议院同意后进行任命，法官只要忠于职守，可以终身任职，非经国会弹劾不能被免职。同时，规定任何一个机关的官员不得在任职期间担任另一机关的职务。摘编自魏海群《美…	根据材料二并结合所学知识，归纳美国三权分立制度确立的原因。综合上述材料，说明唐代分权制与美国三权分立制度的主要不同。	原因在于美国独立战争的胜利，启蒙思想的影响，农民起义的推动，现实政治发展的需要，主要不同在于唐代分权是基于前代分化宰相权力的历史传统，而美国分权则是基于建国前已存在的民主传统，唐代分权主要是将草拟、下达、执行三权平行分立，而美国分权则是将立法、行政、司法三权交叉分立，唐代分权是为了加强皇权专制统治，而美国分权则是为了防止专制和暴政。	美国确立三权分立制度的原因主要包括国内因素和国外因素。国内方面，独立战争后各州为了维护自身利益，导致原来的邦联政府名存实亡，濒临瓦解。国外方面，列强对美国的独立持有敌意，对其虎视眈眈。 与唐代的分权制相比，美国的三权分立制度存在一些主要不同之处。首先，在领导阶级方面，美国主要是为了维护资产阶级的利益而确立三权分立制度，而唐代的分权制则是为了维护封建主义的利益。其次，在实现方式上，美国的三权分立制度旨在防止权力滥用，而唐代的分权制则是为了加强皇权，削弱相权。这些不同点体现了两种制度在目的和执行方式上的差异。	美国三权分立制度确立的原因主要有两个：一是独立战争后，各州为了维护本州统治集团的利益，希望确保自己在国家政治中有一席之地；二是国外列强对美国独立的耿耿于怀，虎视眈眈，因此需要一个稳固而有力的政治体制来维护国家利益。 与唐代的分权制不同，唐朝的分权制是为了阻制其他权力威胁到皇权的独尊，通过分权制来实现君权至上；而美国的三权分立是为了平衡各个权力的利益，通过三权相互制衡来防止任何一权独大，确保政府的权力分散和制衡，以保障国家的稳定和民众的权利。	a	a	根据材料二和结合所学知识，美国三权分立制度确立的原因主要包括： 1. 独立战争后的各州维护本州统治集团利益，导致邦联政府名存实亡，需要通过宪政制度来确保各州利益的平衡和保护。 2. 国外列强对美国独立的威胁，需要一个强有力的中央政府来维护国家的完整和安全。 3. 美国宪政奠基者们将孟德斯鸠的理论系统化和美国化，确立了分权制衡的原则，以防止任何一个机构过度集中权力。 4. 1786~1787年的谢斯起义威胁了资产阶级的基本利益，促使他们达成共识，建立一个稳定的宪政制度。 至于唐代分权制与美国三权分立制度的主要不同，可以从以下几个方面进行说明： 1. 制度性质：唐代分权制主要是指皇权与地方权力的分割，主要是为了维护中央集权和地方的稳定，而美国三权分立制度是为了防止任何一支力量过度集中权力，确保民主和宪政的稳定。 2. 权力结构：唐代分权制下，皇权是最高权力，地方官员虽然有一定的自治权，但最终…	根据材料二以及所学知识，美国三权分立制度确立的原因主要包括以下几点：首先，独立战争后各州为了维护本州统治集团的利益，意识到需要建立一种分权制衡的体系来避免权力过度集中和滥用。其次，富足的资产阶级在面临谢斯起义威胁时，意识到需要建立一种体系来保护他们的基本利益，这种共识促成了三权分立制度的确立。最后，美国宪政的奠基者们系统化和美国化了孟德斯鸠的理论，进一步明确了分权制衡的原则，最终确立了三权分立制度。 唐代的分权制与美国三权分立制度在一些方面有着明显的不同。首先，在唐代，封建制度下的权力是分散在皇帝和官僚贵族手中的，虽然在一定程度上实现了一种分权，但权力较为集中，没有明确的制衡机制。而美国三权分立制度则是通过明确划分国会、总统和最高法院的职权，实现了权力的有效分立和制衡。其次，在唐代，官员之间的权力与职务是相互交织的，官员可以在不同机关之间兼任职务，而美国制度规定任何一个机关的官员不得在任…	b	a	a	b	a	b	why
材料三 解决民族问题，中国采取的不是民族共和国联邦的制度，而是民族区域自治的制度。我们认为这个制度比较好，适合中国的情况。我们有很多优越的东西，这是我们社会制度的优势，不能放弃。《中央民族工作会议精神学习辅导读本》	根据上述材料并结合所学知识，谈谈你对处理民族关系的认识。	认识是中国自古以来就是统一的多民族国家，处理民族关系是历代需要关注的问题，正确处理好民族关系有助于深化民族认同，为国家统一、社会稳定、繁荣发展提供有力保障。	处理民族关系是一个复杂而重要的问题，需要因地制宜，根据不同的地区采取不同的措施。不能简单地一刀切，而应该根据具体情况来制定相应的政策和制度。同时，处理民族关系要以统一为中心，不能脱离多民族国家的整体大局，只有统一才能实现民族团结和国家稳定。对于国家而言，也需要找出适合国情的民族治理制度，以实现各民族和谐共处、共同发展的目标。	根据材料和我所学的知识，我认为处理民族关系是中国国家建设中至关重要的一环。作为一个拥有56个民族的多民族国家，只有处理好民族关系，团结各民族，才能使国家更加稳固和繁荣。民族关系的处理需要遵循平等互助、共同繁荣的原则，否则容易引发内部纷争和分裂，影响国家的统一和发展。民族关系不仅仅关乎着各民族的命运，也关乎着整个国家和人民的未来。因此，中国建立了民族自治制度，根据各地实际情况采取不同的措施，以实现各民族共同发展、共同繁荣的目标。只有团结一心，共同奋斗，才能实现中华民族伟大复兴的梦想。	b	a	处理民族关系是国家治理的重要组成部分，尤其是在多民族国家中。中国采取的民族区域自治制度是其独特的解决民族问题的方式，这种制度在《中华人民共和国宪法》中有明确的规定。民族区域自治制度的核心是根据各民族的历史、文化和地域特点，允许少数民族地区在一定范围内享有自治权，同时保持国家的统一和稳定。 这种制度的优点在于它能够在保持国家统一的前提下，尊重和保护各民族的权利和利益。通过设立民族自治区、自治州、自治县和民族乡，各民族都有机会参与到地方政府的管理和决策中，促进了民族团结和社会和谐。例如，新疆维吾尔自治区、内蒙古自治区等地，都是根据民族区域自治制度设立的，这些地区的自治机关在处理地方事务时，能够更好地考虑到当地民族的具体需求和特点。 此外，民族区域自治制度还能够促进民族团结和社会稳定。通过自治权的实施，各民族都有机会参与到国家的建设和发展中，增强了民族团结的基础。同时，这种制度也有利于国家的统…	根据上述材料和我所学的知识，我认为中国采取民族区域自治制度来解决民族问题是比较合适的。这种制度可以充分尊重各民族的文化传统和习俗，保障他们的权益和利益，促进民族和睦共处。与民族共和国联邦相比，民族区域自治制度更符合中国的国情和民族实际情况。中国拥有众多民族，各民族之间存在着不同的历史、文化和传统，因此需要一种能够保障各民族团结和发展的制度。同时，中国的民族区域自治制度也体现了我国社会主义制度的优越性，能够在保障民族团结的同时，促进经济社会的发展和进步。 举例来说，西藏、广西等地区的自治区制度就为当地的少数民族提供了更多的自治权利，保护了他们的文化传统和宗教信仰。这种制度能够有效缓解民族矛盾，促进当地的稳定和发展。因此，我认为中国采取民族区域自治制度是一个比较有效的处理民族关系的方式。 。	a	b	a	a	a	a	others
材料二 德国工业革命起步时,英国工业革命已临近结束,法国工业革命正在进行。德国为了利用、借鉴英、法的技术和经验，采取了一些具体措施。首先，派人考察。1823—1826年间，普鲁士财政部工商局长就曾两访英国，到伦敦、伯明翰、曼彻斯特等地参观铁厂、纺织厂、蒸气机厂和铁路交通情况。其次,成立引进和推广技术的机构。如普鲁士先后于1810年和1320年成立的技术委员会和工业知识促进协会。再次，招聘外国技术人才。如鲁尔、汉堡、上西里西亚的工矿企业就从英、法、比等国招聘大批工程技术人才,传授先进技术。——摘编自程岂凡《美德两国工业革命特点试析》	根据材料二并结合所学知识，总结德国开展工业革命的特点。	特点在于起步晚，借鉴外国经验，国家政策支持，重视技术人才。	德国开展工业革命的特点包括起步较晚，但通过派人考察外国工厂、借鉴技术与经验，成立引进和推广技术的机构，加快工业技术发展，以及招聘外国技术人才，传援先进技术。	德国开展工业革命的特点包括起步较晚、借鉴英法技术经验、招聘外国技术人才、传授先进技术、培育工程技术人才、成立引进和推广技术的机构、宣传技术和工业思想、推动思想发展、推进人们学习相关知识、为培养人才打下宣传基础。	b	b	德国开展工业革命的特点主要体现在以下几个方面： 1. **借鉴和考察**：德国在工业革命初期，通过派遣官员和专家到英国和法国进行考察，学习他们的技术和经验。例如，普鲁士财政部工商局长在1823年至1826年间两次访问英国，参观了英国的铁厂、纺织厂、蒸气机厂和铁路交通情况。这种实地考察有助于德国了解和掌握先进的工业技术。 2. **建立技术推广机构**：为了引进和推广技术，德国成立了多个机构，如普鲁士在1810年和1830年成立的技术委员会和工业知识促进协会。这些机构的成立有助于集中和组织技术信息，促进技术的交流和应用。 3. **引进外国技术人才**：为了快速掌握和推广先进技术，德国的工矿企业如鲁尔、汉堡、上西里西亚等地大量招聘了来自英国、法国、比利时等国的工程技术人才。这些外国技术人才不仅带来了先进的技术知识，还传授了新的生产方法和管理经验。 4. **利用自然资源和地理位置**：德国…	德国在开展工业革命过程中，具有以下特点：首先，德国重视学习和借鉴英国和法国的技术和经验，通过派遣人员考察、成立技术推广机构和招聘外国技术人才等方式，积极引进和传授先进技术，加速工业化进程。其次，德国政府在工业发展中发挥了重要作用，成立了技术委员会和工业知识促进协会等机构，为技术的引进和推广提供了支持和组织。此外，德国各地工矿企业也积极招聘外国工程技术人才，加速了技术的传播和应用。总的来说，德国在工业革命中注重学习和借鉴，政府和企业合作，加速了工业化进程。.	a	a	a	a	b	b	what
材料永定河属海河水系,清初水恐頻仍靡熙三十七年(1698年) ,直求巡抚主持治河,改行河道,并在两岸就堤防系统。渡工后,康熙皇帝赐名“永定河”,下旨: “永定河工,照黄河岁修、抢修之例办理。”清廷设立永定河道,总理永定河事务,有近2000名河兵常年修守。改名永定河后的40年内,下游漫溢、决口达20次。清中期以后,在永定河修建17处减水坝,各减水坝下均开挖有减水引河。一段时期内不再洪水泛滥,但河道淤和严重,到清末已成“墙上筑夹墙行水”的形势.——据（清）《永定河续志》等	根据材料一并结合所学知识，概括清代治理永定河的措施及其效果。	措施是设立专门机构，建立岁修、抢修制度，改修河道，筑堤束水，修减水坝和减水引河，效果是取得了一定成就，但未根治水患。	清代治理永定河的措施包括在两岸结道堤防系统、修建减水坝、按黄河抢修的例子办理。这些措施使得永定河洪水泛滥得到缓解，但同时也导致河道淤积严重，漫溢和决口事故频繁发生。	清代治理永定河的措施主要包括改行河道、筑堤防系统、设立永定河道总理机构以及修建减水坝。这些措施在一定程度上有效地控制了洪水泛滥，但并未从根源上解决永定河道淤积严重的问题。	b	a	清代治理永定河的措施主要包括以下几个方面： 1. 改行河道：清初，巡抚主持了河道的改行，以改善河流的流向和减少洪水的影响。 2. 建立堤防系统：在河两岸建立堤防系统，以防洪水泛滥。 3. 渡工：在河上修建渡船设施，方便交通，同时也作为河道治理的一部分。 4. 永定河工的管理：康熙皇帝下令，永定河工的修理和抢修要参照黄河的例子进行，确保河道的稳定。 5. 设立永定河道：清廷设立了专门的机构来管理永定河事务，并配备了近2000名河兵进行长期的修护工作。 6. 修建减水坝：在河流中修建17处减水坝，减少洪水的影响，并且在减水坝下开挖减水引河，以引导水流。 这些措施在一段时期内有效地控制了洪水泛滥，河道虽然不再出现大规模的洪水，但由于长期的淤积，河道变得狭窄，形势变得“墙上筑夹墙行水”。这表明虽然治理措施在短期内取得了一定的效果，但长期来看，河道的淤积问题仍然存在，需要进一步的治理措施来解决。	清代治理永定河的措施包括改行河道、修筑堤防系统、设立永定河道、修建减水坝以及开挖减水引河等。这些措施旨在减少下游漫溢和决口的次数，防止洪水泛滥，同时加强河道的维护和管理。虽然在一定时期内取得了一定的效果，减少了洪水泛滥的次数，但是随着时间的推移，河道淤积问题逐渐严重，导致清末时期永定河成为“墙上筑夹墙行水”的情况。这说明清代治理永定河的措施在一定程度上起到了作用，但也面临着河道淤积和管理不善等问题。	a	b	b	a	a	a	what
从中国近现代史学的发展过程来看，曾经形成过三个不同历史发展阶段的新局面：第一次是从19世纪末维新变法时期以西方资产阶级史学开始输入拉开序幕,而主要是在20世纪初辛亥革命前的十来年间，新史学思潮的兴起则是这次新局面的一个重要标志。第二次是从20世纪20年代前后的“五四”运动时期以马克思主义的开始传入为重要标志,并拉开序幕,而它的形成则是在此后较长时期的发展过程中逐步实现的。第三次是中华人民共和国建立之后形成的,它的一个重要标志是从主要少数先进的马克思主义史学家的活动发展成为广泛群众性的马克思主义史学运动,使中国的历史科学有了新的大发展。摘编自俞旦初《二十世纪初年中国的新史学思潮初考》	根据材料并结合所学知识,就近代中国的新史学思潮自拟一个论题,并进行简要阐述。	论题是中国近代史学的形成和发展与社会政治变革的相互影响，阐述在于在近代中国社会急剧变革、新旧嬗变的时代里，资产阶级历史学者为了服务于改良、变法、革命的政治目的，学习研究了近代西方国家、近代日本及俄国的历史，并在国内用于指导政治变革和政治斗争，而这些历史学者在进行政治改良和斗争的过程中汲取经验，又推动了近代史学的发展，如维新变法的代表人物康有为、梁启超都受到西方思想的影响，他们把西方思想与中国传统思想相结合，用于指导维新变法，推动了中国政治近代化的发展，五四运动前后，马克思主义传入中国，与中国社会实际相结合，产生了毛泽东思想，指导了中国的政治运动和政治革命，使中国摆脱半殖民地半封建社会，也在此基础上，中国的知识分子用马克思主义理论与中国历史发展的实际相结合，推动了中国的近现代史学逐步形成和发展，总之，中国近代史学的形成和发展一方面用于指导中国的政治变革，另一方面中国近代政治也推动了近代史学…	发展，推动中国近现代史学不断向前发展。	马克思主义的传入促进了近代中国史学的发展。20世纪初，随着朱执信的《德意志革命家传》的发布和新闻运动的兴起，以及李大钊正式引入马克思主义并宣传，马克思主义思想逐渐成为主流思想，指引着中国人民在救亡图存的同时努力推动新史学思潮的建立。建国后，中国开展了马克思主义史学运动，充分运用唯物史观系统地全面认识历史，使史学得到了先进文化的指引，不断发展并形成了深刻的认识。可以说，马克思主义的传入实现了中国史学的新发展，为中国的历史研究开辟了新的思路和方法。	b	b	论题：近代中国新史学思潮的演变与其对中国历史科学发展的影响 简要阐述： 近代中国新史学思潮的演变是一个复杂的历史过程，它不仅反映了中国社会在政治、经济、文化等方面的巨大变革，也是中国历史科学发展的一个重要标志。从19世纪末的维新变法时期开始，西方资产阶级史学的输入为中国的历史学领域带来了新的思想和方法，这标志着中国新史学思潮的第一次新局面。 在20世纪初，随着辛亥革命的爆发，新史学思潮得到了进一步的发展。历史学家们开始探索中国传统史学与西方史学的结合，形成了一种新的历史研究方法，这是新史学思潮的重要标志。例如，著名的历史学家章太炎就提出了“史学为国之大计”的观点，强调了历史学在国家建设中的重要性。 20世纪20年代的“五四”运动标志着马克思主义的传入，为中国的新史学思潮带来了新的理论武器。马克思主义的历史观和唯物主义世界观为中国历史学家提供了新的解释历史的视角，使得中国的历史研究更加深入…	论题：近代中国的新史学思潮对中国历史研究的影响 近代中国的新史学思潮在不同历史发展阶段的影响是显著的。从19世纪末维新变法时期开始，西方资产阶级史学的输入为中国的历史研究带来了新的视角和方法。这种思潮的兴起，促进了中国历史学的现代化进程，让中国学者开始用更科学的方法来研究中国历史。 随着20世纪初辛亥革命前新史学思潮的兴起，中国历史研究逐渐受到马克思主义的影响。马克思主义的传入为中国历史研究注入了新的理论基础，使历史学者更加关注社会阶级斗争、经济基础和上层建筑等方面的研究，推动了中国历史学的理论深化和发展。 中华人民共和国建立后，马克思主义史学运动更是推动了中国历史研究的大发展。通过少数先进的马克思主义史学家的活动，马克思主义史学运动逐渐成为广泛群众性的运动，使中国的历史科学得以普及和发展。这种新的史学思潮使中国历史研究更加深入、全面，为探讨中国历史的本质和规律提供了重要的理论支持。 综…	a	b	b	a	b	b	others
范旭东原名源让,湖南湘阴县人。1908年,考入京都帝国大学理学院学应用化学,其间，目睹日中现状，遂立志创办中国化学工业实业救国，于是改名范锐，字旭东。当时北洋政府对盐政有改革之意,范旭东被派赴欧洲考察了解盐碱工业。1913年底,范旭东回国筹备创办盐厂。究竟在哪里建厂，范旭东的目光落在了塘沽，“这里最合适不过”，塘沽是渤海湾天然盐都，海陆交通方便，尽管当时的塘沽还是一片荒凉的盐碱地。1914 年 7月，他在塘沽创办久大精盐公司。至1918年,久大已发展为国内颇具规模的近代化工厂了。久大接收了德国在塘沽的铁路支线,收买沿海河的俄国码头,将“天津盐”打入长江流域。1925年,久大精盐公司已是中国最大的精盐制造企业,产盐量由最初的3万担增至50万担,约合3万吨。	根据材料并结合所学知识,简析久大精盐公司得以发展的原因及意义。	原因是“一战”期间列强暂时放松了对华侵略，北洋政府鼓励发展工商业，实业救国精神的推动，范旭东的爱国情操，意义在于范旭东创办的近代民族工业进一步壮大了民族经济，在一定程度上抵制了外国资本主义的经济侵略，其经营模式发挥了工业辐射作用，有利于推动中国的近代化发展进程。	久大精盐公司得以发展的原因包括政府政策支持、一战期间列强压迫减少、爱国救亡运动支持国货以及范旭东的学识和努力。这些因素推动了久大精盐公司的发展，具有重要意义。首先，推动了民族工业的发展，为国家经济的繁荣做出了贡献。其次，对其它工厂起带动辐射作用，带动了整个行业的发展。第三，抗击了列强资本商品输出，维护了国家的经济主权。最后，为后续盐业发展奠定了基础，为行业的长期发展打下了坚实的基础。因此，久大精盐公司的发展对国家经济和盐业发展都具有重要意义。	久大精盐公司得以发展的原因主要有几点：一战期间，列强放松了对中国的侵略，为中国企业提供了一定的发展空间；辛亥革命推翻君主专制制度，社会稳定有利于企业的发展；中国民族主义的发展和经济发展为企业提供了更多的机遇；共和思想深入人心，群众性的爱国运动也为企业的发展提供了支持。 这些原因使得久大精盐公司得以发展起来，具有重要的意义：一方面有利于进一步发展中国民族资本主义，提升国家经济实力；另一方面有利于辐射周边地区推动经济发展，带动整个地区的繁荣；同时也有利于对抗列强的效果，维护国家的独立和主权。因此，久大精盐公司的发展不仅对企业自身有益，也对国家和地区的经济发展和国家利益具有积极的意义。	a	a	久大精盐公司得以发展的原因主要有以下几点： 1. 优越的地理位置：塘沽位于渤海湾，具有天然盐资源和良好的海陆交通条件，这为公司的盐业生产和物流运输提供了便利。同时，塘沽的盐碱地资源丰富，为公司的盐业生产提供了原材料。 2. 创业者的远见与决心：范旭东（原名源让）不仅有着深厚的化学知识和应用化学的专业背景，而且对中国化学工业的发展有着清晰的愿景。他在国外考察盐政改革，并在欧洲学习了现代化的盐业生产技术，为公司的发展奠定了坚实的基础。 3. 创办时间的战略意义：1914年，范旭东在塘沽创办久大精盐公司，正值中国工业化的起步阶段。公司的成立和发展为中国的化学工业和现代化进程提供了重要的推动力。 4. 技术和管理的创新：久大精盐公司在生产技术和管理上进行了创新，接收了德国在塘沽的铁路支线，收买了俄国码头，这些都为公司的生产和运输效率提升提供了有力支持。公司还成功将“天津盐”打入长江流域，扩大了市…	久大精盐公司得以发展的原因主要有以下几点：首先，范旭东具有创业精神和爱国情怀，他看到了中国化学工业的发展机遇，并积极筹备创办盐厂，选择在塘沽建厂，利用当地的天然资源和便利的海陆交通条件。其次，久大精盐公司在发展过程中吸收了德国的铁路支线和俄国的码头，拓展了生产和销售渠道，使得“天津盐”能够打入长江流域，大大提升了公司的影响力和市场份额。最后，久大精盐公司在生产过程中采用了现代化工艺和管理模式，使得产盐量大幅增长，成为当时中国最大的精盐制造企业。 久大精盐公司的发展意义在于，首先，它为中国化学工业实业化的发展树立了榜样，为其他企业提供了发展的经验和启示。其次，久大精盐公司的成功充分展示了中国企业家的创业精神和实践能力，激励了更多人投身企业发展。最后，久大精盐公司的发展不仅带动了当地经济的繁荣，也为中国的盐业现代化做出了积极贡献，推动了中国盐业的发展和壮大。 。	b	a	a	a	b	a	why
材料关于中国古代文献数量,有学者认为有10万种,也有估为7万~8万种,2009年版的《中国古籍总目》则为177 107种,中国文献至少需从甲骨卜辞算起,至春秋战国时期,简册日趋丰富,但直至南朝范晔的《后汉书》中方有关于图书买卖的记叙。至明代,商业出版日趋繁荣,但仍以雕版为主,整个明代出版书籍至多2万种左右,这一数据在清中期以前也未出现显著跃升。钱存训曾指出,在中国传统社会中,印刷术的主要功能是“传先哲之精蕴,启后学之困蒙,亦利济之先务,积善之美谈”。中国文献在发展阶段上没有明显的中辍和低潮期,即使历经灾荒、改朝换代以及外族的入侵,文献传统也能一次又一次地得到恢复。此外,由于儒家思想的核心是整顿衰弊的现实世界并恢复远古黄金世界的辉煌,因此阐释经典以发现前往“大同”的道路,成为思想文化最根本的建设手段,“述而不作”进而变成一种思想和方法原则。正如《四库全书总目》所谓“经禀圣裁,垂型万世,删定…	根据材料一、二并结合所学知识，分析中西方文献发展存在差异的原因。	原因在于中国以农耕经济为主，统治者践行重农抑商政策，西方则鼓励商品经济发展，中国大一统思想根深蒂固，国家长期处于统一状态，西方则自西罗马帝国灭亡后社会逐渐陷入割据状态，中国实行君主专制统治，皇权处于独尊地位，西方王权长期受限，中国自秦以后实行统一文字的举措，西方分裂的社会背景下各地文字与语言差异明显，中国“重思想而轻技术”的文化传统，西方则重视技术的创新，中国儒家思想长期处于统治地位，西方近代以来历经文艺复兴、宗教改革、启蒙运动，思想日益解放，中国自清代以来坚持闭关锁国政策，社会经济发展缓慢，1500年后，西方历经新航路开辟及工业革命，社会经济发展迅速。	根据材料一、二以及所学知识，可以发现中西方文献发展存在差异的原因主要有以下几点。首先，国家政体性质的差异导致了中西方文献发展的不同。在西方国家，尤其是民主国家，文献发展更为开放多元，受到政府监管程度相对较低；而在中国等东方国家，由于政府控制较为严格，文献发展受到更多限制。 其次，文献底蕴所包含的对国家治理的好处也是中西方文献发展差异的重要原因。在西方国家，文献传承了民主制度和法治精神，有利于国家治理的规范和透明；而在东方国家，文献往往受到统治者的控制，更多体现了统治者的意志和权力。 此外，统治者个人对文献发展的态度也会影响中西方文献发展的差异。在西方国家，统治者更倾向于尊重言论自由和知识传播，促进文献的繁荣；而在东方国家，统治者往往更加强调政治稳定和社会秩序，对文献的控制更为严格。 另外，文人阶层对文献传播的态度及力度也会影响中西方文献发展的差异。在西方国家，文人阶层通常具有较高的社会地…	根据材料一、二并结合所学知识，我们发现中西方文献发展存在差异的原因有多个方面。首先，中国文献在传统上能够得到恢复，这与中国文化的历史悠久有关。中国文献发展可以追溯到很早的时期，这为后来的发展奠定了基础。另外，中国文献受到儒家文化的影响较大，这也对其发展产生了重要影响。 而在西方，文献发展的原因则有所不同。首先，西方宗教势力较为强大，这在一定程度上影响了文献的发展方向和内容。其次，西方有多地方语言并存在文化差异，这也导致了文献的多样性和发展方向的不同。此外，西方底层人民的文化传播受到一定的阻碍，这也限制了文献的传播和发展。 综上所述，中西方文献发展存在差异的原因是多方面的，包括文化传统、历史背景、宗教影响以及社会结构等方面的因素共同作用。这些因素共同塑造了中西方文献发展的独特特点和发展路径。	a	a	根据材料一、二以及结合所学知识，我们可以分析中西方文献发展存在差异的原因。 首先，中国古代文献的发展受到了儒家思想的深远影响。儒家思想强调整顿现实世界并恢复远古黄金时代的辉煌，因此阐释经典以发现前往“大同”的道路成为思想文化最根本的建设手段。这种思想文化的核心使得中国的文献传统能够在历经灾荒、改朝换代以及外族入侵后不断得到恢复和发展。相比之下，西方的文献发展则受到宗教和哲学思想的影响，尤其是在中世纪时期，宗教因素对书籍的保存和传播产生了重大影响。 其次，印刷术在中国的应用和发展与西方有所不同。中国的印刷术主要用于传播儒家经典和其他文化作品，而在西方，印刷术的发展与宗教和知识的传播紧密相关。印刷术的普及在西方推动了知识的广泛传播，但同时也导致了知识的分散和多样化，形成了不同的文化和语言圈。 再者，西方的文献发展受到了“发现”古典的影响，这种趋势促进了知识系统的更新。然而，这也导致了地方语言…	根据材料一、二以及所学知识，可以看出中西方文献发展存在差异的原因主要包括以下几点： 1. 文化传统的不同：在中国，儒家思想的核心是整顿现实世界并恢复远古黄金世界的辉煌，因此对经典的阐释和研究具有非常重要的意义。这种思想导致了中国文献传统的延续和强大。而在西方，随着宗教的影响逐渐减弱，知识系统得以更新，文献的发展也更加多元化。 2. 印刷术的普及程度：在中国，印刷术的主要功能是传承先哲的智慧和启蒙后学，因此印刷术在中国起到了非常重要的作用。而在欧洲，虽然印刷术的发展速度更快，但在早期文盲率较高，印刷书籍的普及程度相对较低，直至近代才有所改善。 3. 政治与宗教的影响：在欧洲，执政者基于政治与宗教的考量对图书审查的扩大，导致不同国家的文献发展受到限制，出版市场被永久区隔开来。相比之下，中国古代文献传统并没有受到严重的政治限制。 总的来说，中西方文献发展存在差异的原因主要是由于两种文化传统、印…	b	a	stud_a	b	a	a	what
20世纪50年代,毛泽东高瞻远瞩,提出要下决心搞尖端技术,随后成立中国导弹研制不告父母、下不告妻儿”的铁律下,开始了他的“导弹人生”。在黄纬禄及其战友的共同努力下,我国仅用10年,便走过了从仿制到研制的自主创新之路。1966年10月,中国首次由导弹运载发射的原子弹在核试验预定地点成功爆炸,震惊世界。1970年,黄纬禄担当我国首型潜地固体战略导弹——“巨浪一号”的总设计师。他一上任就与同事们冒着酷暑到南京长机构--国防部第五研究院,黄纬禄被调到二分院从事导弹控制系统的研究工作,并在“上江大桥上做箭体落水试验……每每遇到具体难题,他总是自觉地放下架子到下面去求师解惑。对于那些一知半解的问题,他也不肯草草放过,他总是说,科学来不得半点的虚假。他带领年轻的研制团队攻克重重难关,1982年10月巨浪一号试射成功,不仅使我国拥有了应对核威胁与核讹诈的有效反制手段,也填补了我国固体战略导弹技术的空白,…	根据材料并结合所学知识，简述黄纬禄开展导弹研制的历史背景。	历史背景在于美苏冷战对核技术进行垄断，中苏关系逐渐恶化局势紧张，“一五”计划完成有了一定的工业基础，社会主义制度初步建立。	黄纬禄开展导弹研制的历史背景是多方面的。首先，新中国成立后遭到资本主义国家的敌视，国防安全面临严峻挑战。其次，朝鲜战争爆发使我国国防安全遭到严重威胁，迫使我国加快武器装备的研制和发展。此外，与苏联关系恶化导致苏联撤回了对我国的指导专家，使我国在导弹研制方面面临更大的挑战。最后，我国实施了一五计划，工业发展迅速，为导弹研究提供了更好的条件和支持。这些因素共同推动了黄纬禄及其团队开展导弹研制工作。	黄纬禄开展导弹研制的历史背景主要包括：新中国成立不久、新中国受西方敌视、新中国的工业化建设以及与苏联的合作。在新中国成立不久的时期，国家面临着外部环境的不利因素，受到西方国家的敌视和封锁。为了提升国家的国防实力，加强国家安全，开展导弹研制成为当时的重要任务之一。同时，新中国正处在工业化建设的初期阶段，发展军事工业也成为国家发展的重要方向。此外，与苏联展开合作，获取技术支持和资源保障，对于加快导弹研发进程也起到了重要作用。这些背景因素共同推动了黄纬禄等科学家开展导弹研制工作，为我国后来的军事强国建设奠定了基础。	a	b	黄纬禄开展导弹研制的历史背景可以追溯到20世纪50年代，当时中国的领导人毛泽东提出要发展尖端技术，特别是在导弹领域。这个时期的中国面临着国际政治的压力，尤其是与西方国家的冷战背景下，中国需要通过科技进步来增强自己的国防实力和国际地位。 在这个背景下，黄纬禄和他的团队开始了中国导弹研制的自主创新之路。他们面临的挑战包括从仿制外国技术到独立研发的转变，这是一个艰巨的任务，需要克服技术、资金和人才等多方面的困难。黄纬禄的领导和他的团队的努力最终在1966年成功地发射了中国第一枚由导弹运载的原子弹，这一成就震惊了世界，显示了中国在核武器领域的实力。 随后，黄纬禄继续在导弹领域的研究工作，担任“巨浪一号”固体战略导弹的总设计师。这个项目的成功试射在1982年10月实现，标志着中国在固体战略导弹技术方面取得了重大进展，并且为中国的国防现代化和国际地位的提升做出了重要贡献。	黄纬禄在导弹研制领域的历史背景是20世纪50年代毛泽东提出要搞尖端技术的号召下，成立了中国导弹研制机构。在这个背景下，黄纬禄和他的战友们开始了他们的“导弹人生”。他们在“不告父母、不告妻儿”的铁律下，通过自主创新，仅用10年的时间就实现了从仿制到研制的转变。1966年，中国首次成功爆炸了由导弹运载发射的原子弹，震惊了世界。1970年，黄纬禄担任了我国首型潜地固体战略导弹——“巨浪一号”的总设计师。在他的带领下，团队攻克重重难关，1982年成功试射了巨浪一号导弹。这些历史事件充分展示了黄纬禄在导弹研制领域的杰出贡献和创新精神。。	a	a	a	a	b	b	what
20世纪50年代,毛泽东高瞻远瞩,提出要下决心搞尖端技术,随后成立中国导弹研制不告父母、下不告妻儿”的铁律下,开始了他的“导弹人生”。在黄纬禄及其战友的共同努力下,我国仅用10年,便走过了从仿制到研制的自主创新之路。1966年10月,中国首次由导弹运载发射的原子弹在核试验预定地点成功爆炸,震惊世界。1970年,黄纬禄担当我国首型潜地固体战略导弹——“巨浪一号”的总设计师。他一上任就与同事们冒着酷暑到南京国防机构--国防部第五研究院,黄纬禄被调到二分院从事导弹控制系统的研究工作,并在“长江大桥上做箭体落水试验……每每遇到具体难题,他总是自觉地放下架子到下面去求师解惑。对于那些一知半解的问题,他也不肯草草放过,他总是说,科学来不得半点的虚假。他带领年轻的研制团队攻克重重难关,1982年10月巨浪一号试射成功,不仅使我国拥有了应对核威胁与核讹诈的有效反制手段,也填补了我国固体战略导弹技术的空白…	根据材料并结合所学知识，概述黄纬禄的贡献及其展现的时代精神。	贡献在于推动了我国导弹事业的发展，增强了我国的国防力量，培养了大量科研攻坚力量，其精神也影响着后来者，为我国航空航天事业的发展奠定了基础，时代精神是热爱报效祖国，对科学的执着追求，奋发图强的精神，自信向上，乐于奉献，严谨认真的科研精神。	黄纬禄是我国著名的核科学家，他在自主创新方面做出了重大贡献。在他和他的战友们的共同努力下，我国走上了自主创新之路。他们的努力使得1966年我国成功爆发了原子弹，1982年成功试射了“巨浪一号”。黄纬禄展现了顽强拼搏、锐意进取和无私奉献的时代精神，他为国家的科技发展作出了重要贡献。	黄纬禄的贡献体现了他作为一名科学家和工程师的卓越能力和责任感。他带领团队成功研制出中国导弹，为我国拥有导弹反制手段，填补了我国战略导弹技术的空白，开辟出一条正确的道路。这些成就展现了他的爱国敬业精神和精益求精的学术精神，同时也彰显了他淡泊名利、忠心报国的高尚民族精神。黄纬禄的贡献不仅服务于国家的国防安全，更体现了他作为一名科学家的使命和担当。	a	a	黄纬禄的贡献主要体现在以下几个方面： 1. **导弹技术的自主创新**：黄纬禄在导弹控制系统的研究工作中，带领团队攻克了重重难关，实现了从仿制到研制的自主创新。他的努力使中国在短短十年内走过了从无到有、从依赖外部技术到自主研发的重要转变。 2. **固体战略导弹的成功试射**：作为“巨浪一号”总设计师，黄纬禄在1970年担任这一关键职务时，带领团队克服了诸多技术难题，最终在1982年10月实现了“巨浪一号”的试射成功。这不仅为中国提供了有效的核反制手段，也填补了我国固体战略导弹技术的空白。 3. **科学精神的体现**：黄纬禄在工作中展现了严谨的科学态度和求真求实的精神。他不仅愿意亲自下到实验现场解决问题，还强调科学不容许虚假，这种态度体现了他对科学的敬畏和对知识的追求。 4. **时代精神的代表**：黄纬禄的贡献也体现了当时中国社会的时代精神，即在国家的需要和民族的命运面前，科学技术人…	黄纬禄是我国导弹研制领域的杰出人才，他在中国导弹技术发展历史上留下了不可磨灭的印记。他在中国导弹事业中所展现的时代精神体现在多个方面：首先，他具有高度的责任感和使命感，始终将国家利益放在首位，不惜牺牲个人利益为国家研制尖端技术；其次，他对科学的严谨态度和追求卓越的精神，始终坚持科学方法，不断探索创新，不容许半点虚假；最后，他以身作则，亲自投入到研制工作中，与团队共同攻克重重难关，最终取得了巨浪一号试射成功的成果。在他的带领下，我国固体战略导弹技术得到了巨大的突破，填补了技术空白，为我国的国防事业做出了重要贡献。 。	b	a	b	a	a	a	what
及至晚清，西学东渐和中国传统社会自身发展导致传统政治制度与现实社会差距愈来愈大。其基本格局呈现为科举制度一枝独秀,荐举、捐纳等其他辅助模式不同程度有所存在。作为选官正途,科举制度曾为封建国家政权输送了大量才俊。及至晚清,其实际社会功效却每况愈下。荐举、捐纳作为补救途径其与生俱来的痼疾亦逐渐显现出来。为扭转这一局面，统治者在保存科举制的前提下，新办了一批新式学堂，派遣留学生出国留学，如此新旧并存揭开了选官模式近代转换的序幕。选官结构上历史传统与现实社会的异趣与趋同并非截然对立,往往是同时并存的,逐渐转化的。随着选官模式更新,原有民族限制逐步破除,使封建官吏特别是高层官吏来源多元化。“文武之界破”“满汉之界破”“内外之界破”已经成为选官新潮流。从总体来讲,新式学堂实际培养了一批封建统治的离心力量。而荐举制在实际操作中因缺乏行之有效的制约机制,其成功与否在很大程度上取决于荐举者道德水平之高低。…	根据材料二并结合所学知识,概括晚清中国选官制度演变的背景,并归纳其基本特征。	背景在于鸦片战争后的西学东渐及西方思想文化的传入，中国近代社会转型的现实需求，原有选官制度固有的弊端，中国近代化起步，民族危机的加剧，晚清政府的探索及有识之士的倡导，特征在于历史传统与现实社会的异趣与趋同，基本模式与具体途径的更替与多元，主观动机与客观效果的统一与背离。	晚清中国选官制度的演变背景主要包括西学东渐和政府制度不足以及社会动荡和封建意识的影响。其基本特征是以科举制为主，辅以荐举、捐纳等制度，民族限制几乎不存在。荐举制受荐举者的道德水平高低影响。	晚清中国选官制度演变的背景是晚清社会动荡不安，社会矛盾尖锐，同时受到西学东渐和中国传统社会自身发展不足的影响，科举制的落幕和资本主义萌芽的产生也推动了这一演变过程。晚清中国选官制度的基本特征包括科举制与新式教育相结合，选官标准逐渐多元化，以及缺乏有效的选拔机制。	b	b	晚清中国选官制度的演变背景主要体现在以下几个方面： 1. 西学东渐与传统社会差距加剧：随着西方文化和思想的传入，传统的政治制度与现实社会之间的差距日益扩大。科举制度作为传统的选官正途，面临着前所未有的挑战。 2. 科举制度的局限性：科举制度虽然曾经为封建国家输送了大量的才俊，但其实际社会功效在晚清时期逐渐下降。荐举和捐纳等辅助模式的存在，进一步加剧了科举制度的不公正和腐败现象。 3. 统治者的改革尝试：为了扭转科举制度的局限性，统治者在保存科举制的前提下，新办了一批新式学堂，派遣留学生出国留学。这些措施标志着选官模式从传统向现代转变的开始。 4. 选官结构的多元化：随着新式学堂的培养和留学生的回国，原有的民族限制逐步被破除，使得封建官吏的来源变得多元化。文武之界、满汉之界、内外之界的破坏成为选官新潮流。 5. 选官制度的内在矛盾：荐举制度在实际操作中缺乏有效的制约机制，其成功与否很大程度…	晚清中国选官制度在西学东渐和中国传统社会自身发展的背景下出现了明显的演变。传统政治制度和现实社会之间的差距逐渐扩大，科举制度作为主要选官途径开始出现问题，荐举、捐纳等辅助模式也逐渐显现出痼疾。统治者在保存科举制的前提下，通过新式学堂和派遣留学生出国留学等方式尝试改革选官模式。选官结构上历史传统与现实社会的异趣与趋同逐渐并存，传统的封建官吏来源开始多元化。新式学堂培养了离心力量，荐举制度因缺乏有效的制约机制逐渐失去统治者的控制，最终演变成为封疆大吏培养私人力量的工具。捐纳制度则更加破坏了选官格局，瓦解了选官体制本身。整体而言，晚清中国选官制度演变的背景是由于传统制度与现实社会的脱节，以及种种辅助模式的痼疾暴露所致。其基本特征是逐渐多元化的官吏来源、制度的失控和瓦解，以及私人力量的渗透和滥用。。	a	b	b	a	b	b	what
城乡关系是城市与乡村之间要素流动、产业联动、功能互补、利益调整等关系的总和，是人类社会和人类发展进程中最重要、最基本的关系之一。新中国成立以来,中国共产党领导的城乡关系调整经历了不同的发展阶段。	分析改革开放以来城乡关系调整的启示。	启示在于城乡关系的调整顺应了经济社会发展需求和社会主要矛盾的变化，城乡关系的调整是进一步解放和发展生产力的必然要求，城乡关系的调整有利于缩小城乡差距，推动城乡融合发展，提升人民的获得感、幸福感、安全感是推进城乡关系合理化的重要取向，要素资源在城乡间自由流动迎合了社会主义市场经济的发展。	启示：①要充分利用社会各类型的群众力量，共同促进经济发展。②要遵循“实事求是，解放思想”的科学发展观。③要坚持经济基础决定上层建筑的原理。④要结合自身国情实际情况来进行调整。⑤要简政放权，充分发挥市场的作用。	启示：要坚定不移地走中国特色社会主义道路，以大局为中心。要支持经济建设，大力发展生产力，积极响应国家号召。要发挥自身优势，自觉维护国家权力，积极投入城乡建设，为人民服务。要坚持党的领导，为实现中国伟大复兴贡献自己的力量。	b	b	改革开放以来，中国城乡关系经历了显著的调整，这些调整为中国的快速发展奠定了基础。以下是几个关键的启示： 1. **政策导向的重要性**：中国政府通过一系列政策来调整城乡关系，例如“一乡一策”、“一村一品”等，这些政策强调了政府在推动城乡发展中的作用。通过这些政策，政府能够针对不同地区的实际情况制定合适的发展策略，促进城乡之间的平衡发展。 2. **产业结构的优化**：改革开放以来，中国大力发展了制造业和服务业，推动了城乡产业结构的优化。例如，通过建立经济技术开发区、工业园区等，促进了城乡之间的产业链联动，提高了城乡之间的经济联系。 3. **城乡融合发展**：随着城市化进程的加快，城乡之间的融合成为必然趋势。政府通过推动城乡融合发展，实现了城乡之间的资源共享和功能互补，促进了城乡之间的利益协调。 4. **农村改革的深化**：农村土地制度改革、农村金融服务的改善等措施，有效地促进了农村经…	改革开放以来，中国城乡关系调整的启示主要包括以下几点： 1. 城乡发展要均衡。改革开放以来，城市经济发展迅速，但也导致了城乡发展不平衡的问题。因此，城乡发展要均衡，要注重农村经济的发展，同时也要加强城市与乡村之间的联动与互补关系。 2. 保障农民权益。改革开放以来，农民的权益保障得到了一定程度的提升，但仍存在诸多问题，如土地流转、农民收入等。因此，在城乡关系调整中，要更加注重保障农民的合法权益，确保他们有稳定的收入来源和生活保障。 3. 加强城乡基础设施建设。改革开放以来，城市基础设施建设取得了很大进展，但农村基础设施建设相对滞后。因此，要加强农村基础设施建设，提高农村居民的生活水平和生产条件。 4. 推动城乡一体化发展。改革开放以来，城市与乡村之间的差距逐渐缩小，城乡一体化发展成为未来发展的重要方向。因此，要加强城乡一体化规划和政策支持，促进城乡间要素的流动和资源的共享，实现城乡共同发…	a	b	b	a	b	b	what
唐宋时期是我国茶业史上的一个重要阶段。唐宋茶叶生产为当时人们的生活消费提供了新的产品。作为备受欢迎的饮品，茶叶丰富了人们的精神文化生活，改变了旧的生活方式，促进了人们的相互交往。唐宋茶业经济的发展，不仅大大减少了自然经济的“地盘”，而且使得围绕着茶叶商品的生产、流通、分配、消费的人们的社会交往变得复杂起来，进而逐渐克服了人与人之间及人与自然之间关系的狭隘性。宋政府通过控制茶叶互市贸易,赏赐茶叶给少数民族首领、赏赐茶叶给军队官兵等方法增强军队力量，换取和平。由于少数民族嗜好茶茗，茶叶成为民族间交往的媒介之一，成为协调民族关系的一个重要因素。摘编自孙洪升《论唐宋时期茶叶经济发展与社会变迁》	根据材料一并结合所学知识，简析唐宋时期茶叶经济发展的影响。	影响在于促进了农业生产的商品化，推动了商品经济的发展，增加了政府财政收入，促进了民族间经济文化交流，有利于缓和中原王朝与周边民族政权的关系，推动了茶文化全面发展，丰富了人们的精神文化生活，推动了对外贸易发展，使茶叶成为中华文化的象征之一，促进了人与人之间的交往。	唐宋时期茶叶经济的发展对社会产生了多方面影响。首先，茶叶的兴起改变了人们的旧有生活方式，丰富了他们的精神文化生活。其次，茶叶作为商品的流通促进了商品经济的发展，推动了经济的繁荣。此外，茶叶的贸易也起到了协调民族关系的作用，促进了邻国之间的和平稳定。最后，茶叶的生产和贸易为政府带来了不少财政收入，增加了国家财政的实力。因此，唐宋时期茶叶经济的发展在多个方面对社会产生了积极影响。	唐宋时期茶叶经济的发展对当时人们的生活消费产生了影响，为他们提供了新的产品。茶叶的生产和贸易活动大大减少了自然经济的“地量”，推动了商品经济的发展。这种商品经济的兴起使人们的社会交往变得更加复杂，促进了不同地区之间的贸易往来和文化交流。茶叶作为一种重要的商品，促进了民族之间的交流和融合，成为协调民族关系的一个重要因素。茶叶经济的发展也逐渐改变了人与人之间以及人与自然之间的关系，拓展了人们的视野，促进了社会的进步与发展。	b	b	唐宋时期茶叶经济的发展对当时的社会产生了深远的影响。首先，茶叶的普及为人们的生活消费带来了新的选择，茶文化的兴起丰富了人们的精神文化生活，改变了传统的饮食习惯。例如，唐代诗人李白的诗作中就有“一杯浊酒，能饮一生”的名句，反映了当时人们对于茶的喜爱和茶文化的影响。 其次，茶叶经济的发展促进了商品经济的发展，减少了自然经济的“地盘”，使得人们的社会交往变得更加复杂。茶叶的生产、流通、分配和消费形成了一个完整的经济体系，促进了社会分工和市场的形成。 再者，宋政府通过控制茶叶贸易和赏赐茶叶等方式，茶叶不仅成为一种经济手段，也成为维护国家统一和民族关系的重要工具。茶叶的赏赐能够增强军队的士气，换取和平，同时由于少数民族嗜好茶茗，茶叶成为民族间交往的媒介，帮助宋政府与少数民族建立起稳定的关系。 总之，唐宋时期茶叶经济的发展不仅推动了经济的发展和社会的进步，也在一定程度上促进了文化的交流和民族关系的和…	唐宋时期茶叶经济的发展对社会产生了深远影响。首先，茶叶的生产和交易推动了农业经济的发展，提高了农民的收入和生活水平。其次，茶叶的普及使得茶文化渗透到人们的日常生活中，丰富了人们的精神文化生活。此外，茶叶的流通也促进了各地区之间的经济联系和文化交流，加深了人们之间的相互交往。同时，宋政府通过茶叶贸易来增强军队力量，换取和平，展现了茶叶在外交上的重要作用。最重要的是，茶叶成为了民族间交往的媒介，有助于协调民族关系，推动了民族之间的和谐发展。	a	b	b	a	b	b	what
新中国建立初期形成了留学苏联、东欧的热潮。1950年,我国与波兰、捷克等5个东欧国家共交换25名留学生,学习语言、历史等科目。另外,重工业部和燃料工业部从革命干部中选出10名政治表现突出的留学生赴波兰、捷克学习技术,这是新中国公派留学教育之先声。1950年起,为了适应国家经济建设的需要,新中国开始正式较大规模地向苏联派出留学生,以培养重工业所需要的工程技术人才。这一阶段的留苏热潮,一直持续到20世纪60年代中苏关系的恶化之时。摘编自张雪蓉《新中国建立以来我国留学教育的历史变迁和时代特点》	根据材料一并结合所学知识，概括新中国初期留学教育的特点。	特点在于留学生选拔突出政治要求，以苏联、东欧社会主义国家为主要留学目的地，绝大多数是国家有计划地派出的公费学生，与国家工业建设紧密相关，着眼于为新中国培养技术人才。	新中国初期留学教育的特点主要包括以培养工程技术人才为主，与其他国家交换学生学习技术，适应国家经济建设的需要，以及具有先进性。	新中国初期留学教育的特点包括形成留学苏联、东欧的热潮，向社会主义国家学习并建立基础关系。在1950年以前，主要学习语言、历史等科目，同时学习以重工业为基础的技术，推行向苏联建设模式前进。从1950年开始，为适应国家经济发展的需要，新中国开始向苏联派出大规模的学生学习，以培养所需的工程技术人才，直到中苏关系恶化之时才结束热潮。	b	b	新中国初期留学教育的特点主要体现在以下几个方面： 1. 目的明确：在新中国成立初期，留学教育的主要目的是为了培养工程技术人才，特别是重工业和燃料工业的技术人才，以满足国家经济建设的需要。例如，重工业部和燃料工业部选出的10名政治表现突出的留学生赴波兰和捷克学习技术，体现了这种目的明确的特点。 2. 国际合作：新中国初期的留学教育也体现了国际合作的精神。1950年，中国与波兰、捷克等5个东欧国家共交换25名留学生，学习语言、历史等科目。这表明新中国在国际上寻求合作，通过教育交流来增进相互理解和友谊。 3. 政治性强：在那个时期，留学教育不仅仅是学术上的学习，更有政治上的考量。留学生往往是政治表现突出的革命干部，这意味着政治素质和忠诚度是选择留学生的重要标准之一。 4. 时代背景：新中国初期的留学教育紧密结合了当时的时代背景和国家建设的需要。随着中苏关系的发展，1950年起中国开始大规模向苏…	新中国初期留学教育的特点包括：与东欧国家的留学交流，培养不同领域的人才；重点培养工程技术人才，以适应国家经济建设的需要；留苏热潮持续到中苏关系恶化时期。这一阶段的留学教育注重政治表现，培养符合国家需求的专业人才，并借助与苏联等国的交流来提升国家的科技实力。。	b	b	b	a	b	b	what
材料一 1565 年，西班牙人乌尔达内塔，开辟马尼拉帆船航线，从美洲到亚洲实现直航.自带牙律宾甲米地港启航,利用东南季风,向北航至北纬38-40,再利用西风向东航行,至北美利洲阿卡普科港,然后大帆船驶向秘鲁卡亚俄港口,史称“太平洋丝绸之路”.1565年,西班牙占领菲律宾后,在太平洋建立循环贸易体系。中国船把丝绸、瓷器、工艺品运到马尼拉,西班牙船把中国货转运到阿卡普科，然后，西班牙大帆船再把美洲白银运到马尼拉，换取中国的商品，如此循环。	根据材料一并结合所学知识,简述开辟马尼拉帆船航线后,在太平洋建立的循环贸易体系兴盛的因素。	因素在于新航路开辟，西方殖民扩张，美洲银矿的开采，西班牙拥有大量金银货币，中国传统手工业发达。	开辟马尼拉帆船航线后，太平洋循环贸易体系兴盛的因素主要有三个：首先，西班牙人占领菲律宾并建立马尼拉作为贸易中转站，为贸易活动提供了便利的条件；其次，季风和洋流的方向适合航行，使得航线更加畅通；最后，由于中国商品（如丝绸、瓷器等）和美洲白银的高需求，推动了贸易循环的持续发展。这些因素共同作用，促进了太平洋循环贸易体系的繁荣。	开辟马尼拉帆船航线后，太平洋循环贸易体系兴盛的因素主要包括以下几点：首先，新航路的开辟实现了美洲和亚洲之间的直接航线，极大地促进了贸易往来和交流。其次，西方殖民扩张导致西班牙控制了菲律宾，为贸易提供了便利条件。此外，美洲的银矿开采大大增加了金银的供应，使得西班牙拥有了大量的金银货币，进一步促进了贸易的发展。最后，中国手工业的发达，尤其是丝绸和瓷器的生产，也为循环贸易体系的兴盛提供了重要支持。这些因素共同作用，使得太平洋循环贸易体系在当时得以繁荣发展。	b	b	开辟马尼拉帆船航线后，在太平洋建立的循环贸易体系兴盛的主要因素包括： 1. 地理位置优势：马尼拉作为亚洲的门户城市，其地理位置使得它成为连接亚洲与美洲的关键节点。西班牙人利用东南季风和西风的自然航线，实现了从美洲到亚洲的直航，这极大地减少了航行距离和时间，提高了贸易的效率。 2. 贸易物品的需求：在16世纪，欧洲特别是西班牙对亚洲的丝绸、瓷器、工艺品等奢侈品有很高的需求，而美洲则富含白银。这种对不同大陆商品的需求差异为循环贸易提供了物质基础。 3. 西班牙的殖民扩张：西班牙在1565年占领菲律宾后，利用其在美洲的殖民地资源，特别是白银资源，来换取亚洲的商品。这种殖民扩张为贸易体系提供了强大的经济动力。 4. 政治和军事力量：西班牙作为一个强大的帝国，其在太平洋的政治和军事力量有助于维护贸易路线的安全，保护商船的航行，确保贸易的顺利进行。 5. 经济利益的驱动：循环贸易体系为参与者提供了巨…	开辟马尼拉帆船航线后，在太平洋建立的循环贸易体系兴盛的因素主要有以下几点： 首先，西班牙人通过开辟直航航线，实现了从美洲到亚洲的便捷交通，使得贸易变得更加便利和高效。这样的直航航线不仅缩短了货物运输的时间，也减少了运输成本，促进了贸易的发展。 其次，西班牙人在菲律宾建立了马尼拉作为贸易中心，吸引了来自中国等地的商贸活动。这种贸易集散地的建立为循环贸易体系提供了有利条件，使得各种商品能够方便地在这里交易和转运。 此外，西班牙人运用了东南季风和西风等自然条件，使得货船能够顺利航行并抵达目的地，保障了贸易的顺利进行。 总的来说，开辟马尼拉帆船航线后，在太平洋建立的循环贸易体系兴盛的原因是由于便捷的交通、建立了贸易中心以及利用了自然条件等多方面因素共同作用所致。	a	b	b	a	b	b	why
