# Supplementary material
Source: ML conference proceedings conference paper supplement (https://openreview.net/forum?id=R7pR4dzgAV)
Supplement: supplementary_material [file is_in.xlsx]

## Sheet: Sheet1
Geograhy	Politics	History	Law	Psychology	Medicine
0.589	0.588	0.579	0.68	0.563	0.68
0.487	0.52	0.526	0.61	0.521	0.6
0.55	0.608	0.597	0.65	0.688	0.64
0.47	0.523	0.548	0.48	0.531	0.63
