# Supplementary material
Source: ML conference proceedings conference paper supplement (https://openreview.net/forum?id=R7pR4dzgAV)
Supplement: supplementary_material [file law.xlsx]

## Sheet: Sheet1
	Concise_Reference	model_answer_a	model_answer_b	model_answer_a vs model_answer_b	model_answer_a vs model_answer_b_new
简述犯罪客体的种类	犯罪客体是犯罪活动侵害的、为刑法所保护的社会利益。对犯罪客体可按所侵害的社会关系范围大小划分为三种：一般客体、同类客体和直接客体。一般客体，是指一切犯罪所共同侵害的社会利益，即社会利益的总体。直接客体、同类客体 都 是社会利益总体般客体的组成部分，三者之间是个别、局部与整体的关系。同类客体，是指某一类犯罪共同侵害的社会利益。犯罪的同类客体概括的是一类犯罪的共同 属 性，是对犯罪进行分类的基础。直接客体，是指某一犯罪所直接侵害的某种特定的社会利益。犯罪的直接客体是某种犯罪构 成 的组成部分，它直接反映该种犯罪行为所侵害利益的社会性质。直接客体可分为简单客体和复杂客体。	在法律理论中，犯罪客体是指那些在犯罪过程中被侵犯、损害的客体。这些客体主要包括人体、财产和其他非人身财产等。犯罪客体的种类可以分为以下几类： 1. 人体犯罪客体：指的是犯罪行为直接侵犯、损害他人身体健康的客体。例如，故意伤害、杀人等犯罪行为都属于人体犯罪客体。 2. 财产犯罪客体：指的是犯罪行为直接侵犯、损害他人财产的客体。例如，抢劫、盗窃、诈骗等犯罪行为都属于财产犯罪客体。 3. 其他非人身财产犯罪客体：指的是除了人体和财产外的其他客体，如环境、文化遗产等。例如，破坏环境、盗窃文化遗产等犯罪行为都属于其他非人身财产犯罪客体。 在律师看来，犯罪客体的损害不仅仅是对物质财产的损失，更是对人体健康和社会秩序的严重破坏。因此，中医在治疗犯罪后遗症时，会考虑到犯罪客体的损害程度和类型，采取相应的治疗方法来恢复受害者的健康和心理状态。	犯罪客体的种类有很多，主要包括人身、财产、社会等。其中人身犯罪包括伤害罪、杀人罪等；财产犯罪包括盗窃、抢劫、诈骗等；社会犯罪包括贩毒、走私、盗版等。不同种类的犯罪客体对社会造成的危害程度不同，因此也需要采取不同的措施来进行预防和打击。	b	b
什么是集资诈骗罪与非法吸收公众存款罪的区别?	集资诈骗罪是指以非法占有为目的，使用诈骗方法非法集资，数额较大的行为。非法吸收公众存款罪是指违反国家金融管理法规非法吸收公众存款或变相吸收公众存款，扰乱金融秩序的行为。集资诈骗罪与非法吸收公众存款罪的区别有：侵犯客体不同。集资诈骗罪侵害的客体是国家的金融管理秩序和公私财产的所有权，非法吸收公众存款罪侵犯的客体是国家的金融管理秩序。犯罪客观方面不同，集资诈骗罪以使用诈骗方法为构成犯罪的必要条件，非法吸收公众存款罪不以使用诈骗方法为构成犯罪的必要条件。犯罪主观方面不同，集资诈骗罪要求行为人必须具有非法占有的目的，而非法吸收公众存款 罪不要求行为人以非法占有为目的。	集资诈骗罪和非法吸收公众存款罪都是中国刑法中针对金融诈骗行为的两种罪名，它们之间存在一定的区别： 1. **犯罪构成**： - **集资诈骗罪**：根据《中华人民共和国刑法》第七百零二条的规定，集资诈骗罪是指以欺诈手段吸收资金，用于非法经营或者其他非法目的，造成巨大社会影响或者造成巨额损失的行为。这里的“集资”通常指的是通过非法手段吸收多人资金，用于非法目的。 - **非法吸收公众存款罪**：根据《中华人民共和国刑法》第七百零三条的规定，非法吸收公众存款罪是指以欺诈手段吸收公众存款，未经国家金融监督管理机构的许可，或者超越许可范围的行为。这里的“公众存款”通常指的是通过公开的方式吸收的存款，包括银行存款和非银行金融机构的存款。 2. **犯罪对象**： - **集资诈骗罪**：其犯罪对象不仅限于公众存款，还包括其他形式的资金，如企业内部资金、个人资金等。 - **非法吸收公众存款罪**：…	集资诈骗罪与非法吸收公众存款罪是两种不同的犯罪行为。集资诈骗罪是指以非法占有为目的，通过虚构的投资项目或者其他手段，骗取他人财物，情节严重的构成犯罪。而非法吸收公众存款罪是指未经金融监管部门批准，以非法占有为目的，以各种方式吸收公众存款的行为，情节严重的构成犯罪。 区别在于，集资诈骗罪主要是通过虚构的投资项目等方式骗取他人财物，而非法吸收公众存款罪则是专门针对吸收公众存款的行为。另外，非法吸收公众存款罪通常是指针对金融领域的犯罪行为，而集资诈骗罪则更广泛适用于各个领域。 举例来说，如果一个公司通过虚假承诺吸收公众存款，那么这就构成了非法吸收公众存款罪；而如果一个个人通过虚构的投资项目骗取他人财物，那么这就构成了集资诈骗罪。	a	a
什么是地役权的特征?	地役权是指不动产的权利人如所有权或使用权人，为自己使用不动产的便利或提高自己不动产的效 益而利用他人不动产的权利。地役权的特征包括：地役权的主体包括不动产的所有权人和使用权人。地役权的内容是利用他人不动产，并对他人的权利加以限制。地役权的客体是他人不动产。地役权的设立目的是为供自己使用不动产之便利或效益之提高。地役权是否有偿及存续期限依当事人约定。地役权具有从属性。地役权的从属性意味着地役权不得脱离需役地而存在，不得单独处分，必须与需役地的所有权或使用权一同转移。	地役权是指一方对他人土地上的建筑物或其他附着物享有使用权的权利。地役权的特征主要包括以下几点： 1. 对他人土地的附着物使用权：地役权的权利人对他人的土地上的建筑物或其他附着物享有使用权，而不涉及对土地本身的所有权。 2. 特定性：地役权的使用权是特定、明确的，通常是为了特定的目的，如通行、照明、排水等。 3. 不可转让性：地役权通常是不可转让的，除非法律另有规定或者权利人与被许可人约定转让。 4. 不可分割性：地役权是不可分割的，权利人享有的权利与土地的使用权是不可分开的。 5. 不可独立处分性：地役权的权利人在行使地役权时，不得以此权利为要约、要价或其他目的独立处分。 6. 被许可人承担义务：被许可人（即土地所有权人）必须允许权利人行使地役权，并承担相应的义务，如维修、清洁等。 举例来说，如果甲地的土地上有一座桥，乙地的土地所有者可以对这座桥享有通行权，即地役权。甲地的土地所有者在此…	地役权是指地主对自己的土地上的特定区域或者特定部分的使用权利。它的特征包括：1. 地役权是一种物权，具有物权的基本特征，如有关物权的设立、变更、转让、消灭等法律规定；2. 地役权是相对的权利，即地役权人的权利对应于地役权人所处的土地；3. 地役权具有相对性，即地役权人可以对他人行使其地役权所规定的权利，而他人则不得干扰地役权人行使其地役权；4. 地役权是一种限制权利，即地役权人的权利是以限制地主的权利为目的，地役权人只能在被限制的范围内行使权利。举例来说，某个地主允许邻居在他的土地上种植蔬菜，那么这种使用权就是地役权。	a	a
什么是赠与人可以行使法定撤销权的事由	赠与人的法定撤销权，是指在具备法律所规定的撤销原因时，赠与人依法撤销赠与的权利。根据我国合同法的规定，在下列情形下，赠与人可以自知道或者应当知道撤销原因之日一年内撤销赠与：受赠人严重侵害赠与人或赠与人的近亲属。受赠人对赠与人有扶养义务而不履行。受赠人不履行赠与合同约定的义务。	赠与人可以行使法定撤销权的情况主要包括以下几种： 1. 受赠人在接受赠与时有欺诈行为：如果受赠人在接受赠与时采取了欺骗手段，比如隐瞒真实意图、提供虚假信息等，赠与人有权撤销赠与。 2. 受赠人未按照约定使用赠与物：如果赠与时有明确的使用约定，受赠人未按照约定使用赠与物，导致违背了赠与的目的，赠与人可以撤销赠与。 3. 受赠人对赠与物进行了违法使用：如果受赠人将赠与物用于违法目的，或者将赠与物转让给他人用于违法目的，赠与人有权撤销赠与。 4. 受赠人对赠与物进行了破坏或损害：如果受赠人故意或者过失对赠与物造成了严重损害，导致赠与物的价值大幅下降，赠与人可以撤销赠与。 5. 受赠人死亡后其继承人不符合赠与条件：如果赠与时设定了特定继承人条件，受赠人死亡后其继承人不符合这些条件，赠与人可以撤销赠与。 需要注意的是，行使法定撤销权通常需要在发现违反条件的情况后尽可能快地采取行动，且撤销权的行使应…	赠与人可以行使法定撤销权的事由包括： 1. 受赠人未履行赠与目的，即受赠人未按照赠与约定的目的使用赠与财产，或者达不到赠与的目的； 2. 受赠人对赠与人不当怠慢或者虐待，即受赠人对赠与人有不当怠慢或者虐待的行为； 3. 受赠人丧失或者严重损害赠与人的生活保障，即受赠人对赠与人的生活保障有丧失或者严重损害的行为。 举例：如果赠与人将一套房产赠与子女，但子女未按照赠与目的履行，而是私自出售了房产，这就是赠与人可以行使法定撤销权的事由之一。	a	a
简述单位犯罪自首的认定。	单位犯罪的自首，是指单位在犯罪之后，自动投案，如实交代自己的罪行的行为。单位犯罪案件中，单位集体决定或者单位负责人决定自动投案，如实交代单位犯罪事实的是单位自首。 单位直接负责的主管人员自动投案，如实交代单位犯罪事实的，应当认定为单位自首。	单位犯罪自首的认定是指在犯罪行为尚未受到追究或者追究尚未完成时，犯罪单位主动投案、主动接受司法机关的调查、检察机关的审查或者法院的审判，并积极配合调查、审查、审判，主动承担相应的法律责任的行为。 根据《中华人民共和国刑法》第五十四条的规定，犯罪单位自首的，减轻或者mitigating其刑罚。具体认定标准包括： 1. 犯罪行为尚未受到追究或者追究尚未完成时，犯罪单位主动投案。 2. 犯罪单位主动接受司法机关的调查、检察机关的审查或者法院的审判。 3. 犯罪单位积极配合调查、审查、审判，并主动承担相应的法律责任。 例如，如果一家公司在发现其员工违法行为后，主动向司法机关报告，并积极配合调查，提供必要的证据和信息，主动承担相应的法律责任，那么这家公司可能会被认定为自首，根据刑法的规定，可能会得到刑罚的减轻。	单位犯罪自首是指单位犯罪后，能够及时自动向司法机关或者有关部门交代犯罪事实，主动提供犯罪证据，有助于查清事实、追究犯罪责任的行为。单位犯罪自首的认定主要有以下几个条件：首先，单位应当自动向司法机关或者有关部门交代犯罪事实；其次，提供的犯罪事实应当真实、完整；最后，自首行为应当对查清案件事实、追究犯罪责任具有实质性帮助。 具体来说，根据《中华人民共和国刑法》，单位自首的情节可以从处罚中予以酌定。如果单位自首，可以从轻或减轻处罚；如果单位自首并且提供的证据和情节重大，还可以减轻处罚或者免除处罚。 举例来说，某公司发现自己的员工在经营活动中存在贪污行为，公司主动报案并提供了相关证据，这就可以被认定为单位犯罪自首。在司法审判时，可以从轻处罚该公司。 。	b	a
简述徇私枉法罪的构成要件	侵犯的客体是国家司法机关的正常活动与国家的司法公正。客观方面表现为∶一是对明知是无罪的人而使他受追诉;二是对明知是有罪的人而故意包庇不使他受追诉;三是在刑事审判活动中故意违背事实与法律作枉法裁判。犯罪主体是特殊主体，即司法工作人员。主观方面表现为直接故意，并具有徇私的动机。	徇私枉法罪是指公务员或者国家工作人员，利用其职务上的便利，出于私利或者他人的利益，对案件、事项、决定、命令等进行不公正的处理，损害国家利益或者公民、法人权益的犯罪。构成徇私枉法罪的要件主要包括以下几个方面： 1. 行为人是公务员或者国家工作人员：这类人员因其职务上的便利，可能会对案件、事项、决定、命令等进行不正当的影响。 2. 利用职务上的便利：行为人必须利用其职务上的地位、职权或者其他便利条件，对案件、事项、决定、命令等进行不正当的干预。 3. 出于私利或者他人的利益：行为人的行为必须是出于私利或者他人的利益，而不是出于公正的原则。 4. 对案件、事项、决定、命令等进行不公正的处理：行为人的行为必须导致案件、事项、决定、命令等的不公正结果，损害国家利益或者公民、法人权益。 5. 有犯罪结果：行为人的行为导致的不公正结果必须是明确的，可以是法律规定的具体后果，如财产损失、名誉损害等。 举…	徇私枉法罪的构成要件包括以下几点：一是主观方面，即行为人的故意或者过失，要求其明知或者应当知道自己的行为违反了法律规定，却仍然为了个人私利而故意违法或者明知违反法律却不作为。二是客观方面，即行为人的行为必须导致了不正当的法律后果，例如损害了国家、集体或者他人的合法权益。在证据确凿的情况下，徇私枉法罪通常会受到法律的严厉打击。 举例来说，如果一个政府官员为了个人利益而滥用职权，导致了国家或者他人的利益受损，那么他就构成了徇私枉法罪。	b	a
简述撤销监护人资格的法定事由	实施严重损害被监护人身心健康的行为;怠于履行监护职责，或者无法履行监护职责且拒绝将监护职责部分或者全部委托给他人，导致被监护人处于危困状态;实施严重侵害被监护人合法权益的其他行为。	撤销监护人资格的法定事由主要包括以下几种情况： 1. 监护人不履行监护职责：监护人未能为被监护人提供必要的生活保障和教育，导致被监护人权益受损。 2. 监护人能力丧失：监护人因精神疾病、身体疾病或其他原因丧失了行使监护权的能力。 3. 监护人死亡或丧失民事行为能力：监护人的死亡或丧失民事行为能力导致无法继续履行监护职责。 4. 监护人有其他监护关系冲突：监护人与其他监护人之间存在利益冲突，无法共同为被监护人做出决定。 5. 监护人违法乱纪：监护人有违法行为，影响到被监护人的正常成长和发展。 根据《中华人民共和国民法典》第六百零二条规定，监护关系的变更、终止应当报经人民法院审批。被监护人或者监护人的法定代理人、监护人之间的监护关系冲突，或者监护人不履行监护职责的，应当向人民法院申请变更或者终止监护关系。	根据《中华人民共和国监护法》，撤销监护人资格的法定事由包括但不限于以下几种情况： 1. 监护人疏忽职守，造成被监护人遭受重大损害的； 2. 监护人利用监护关系，侵害被监护人合法权益的； 3. 监护人有严重的违法犯罪行为的； 4. 监护人无力履行监护职责的； 5. 监护人有严重的不良嗜好或者品行的； 6. 监护人丧失监护能力的。 以上是撤销监护人资格的法定事由的一些主要情况，具体情况具体分析。在实际操作中，法院会根据案件的具体情况来判断是否满足法定事由，并做出相应的判决。 。	a	a
简述侵犯商标权的主要情形	未经商标注册人的许可，在同一种商品上使用与其注册商标相同的商标的;未经商标注册人的许可，在同一种商品上使用与其注册商标近似的商标，或者在类似商品上使用与其注册商标相同或者近似的商标，容易导致混淆的;销售侵犯注册商标专用权的商品的;伪造、擅自制造他人注册商标标识或者销售伪造、擅自制造的注册商标标识的;未经商标注主册人同意，更换其注册商标并将该更换商标的商品又投入市场的;故意为侵犯他人商标专用权行为提供便利条件，帮助他人实施侵犯商标专用权行为的;给他人的注册商标专用权造成其他损害的。	侵犯商标权主要包括以下几种情形： 1. 未经授权使用他人的商标：这包括在商品或服务上使用他人的商标，或者在商业活动中使用他人的商标，以致可能导致消费者误认为该商品或服务与原商标权人有关联，或者误认为该商品或服务是原商标权人生产或授权的。 2. 模仿他人的商标：即在商标上进行较为明显的变化，但仍然容易导致消费者混淆，认为该商标与原商标有联系。 3. 使用与他人商标相似的商标：即在商标的文字、图形或组合上进行较为细微的修改，但仍然可能导致消费者对商标的识别和区分产生困难。 4. 违反商标使用限制：商标权人在注册商标时可能会设定特定的使用限制，例如商标只能用于特定的商品或服务。未经商标权人同意，擅自扩展商标的使用范围，也构成侵犯商标权。 5. 违反商标保护期限：商标的有效期限通常为10年，需要在商标注册证到期前进行续展。未在规定时间内续展的商标，可能会失去保护，使用该商标的行为将构成侵权。 举…	侵犯商标权的主要情形包括以下几种： 1. 盗用商标：未经商标所有人许可，擅自使用与其商标相同或者近似的标识，使公众容易混淆，从而损害商标所有人的合法权益； 2. 制造、销售假冒注册商标的商品：制造、销售带有他人注册商标的假冒商品，使公众误认为是其官方授权或者原产地商品，从而损害商标所有人的合法权益； 3. 未经授权使用注册商标：未经商标所有人允许，在商品上使用其注册商标，或者在商标授权范围之外使用商标，造成混淆误认，损害商标所有人的合法权益； 4. 恶意注册商标：恶意注册他人商标或者与他人商标近似的商标，以谋求非法利益，损害商标所有人的合法权益。 举例：某公司未经授权在其产品包装上使用了另一家公司的商标，并在销售中宣传该商品是另一家公司的产品，从而导致公众误认，损害了商标所有人的权益。 .	a	a
什么是纯正不作为犯的构成条件	纯正不作为犯(或称真正不作为犯)，指行为人行为构成了法定的犯罪行为本身就是不作为的犯罪。如遗弃罪、拒不执行判决裁定罪等。其“纯正性”在于人的行为形式与法定的犯罪行为形式是一致的，即都是不作为。其构成条件如下:行为人负有某种特定的义务。这种义务来自于法律上的明文规定；行为人能够履行义务。如果行为人虽有防止结果发生的义务，但是由于缺乏必要的能力或其他原因而不可能防止危害结果发生的，也不成立不作为犯罪；行为人不履行特定义务，造成或者可能造成危害结果。根据刑法分则的明文规定，只能以不作为的行为形式构成犯罪，而不可能以作为的行为形式构成犯罪，这是不作为犯的最本质特征。	纯正不作为犯是指犯罪行为的客观方面不包括任何行为表现，只是指犯罪结果的发生。构成条件主要包括以下几个方面： 1. **犯罪结果的发生**：纯正不作为犯的构成要件之一是犯罪结果的发生。例如，交通肇事罪的构成要件之一是造成他人伤亡或财产损失，这里的“造成”就是犯罪结果的发生。 2. **无行为表现**：在犯罪结果发生的同时，犯罪行为的主体没有进行任何行为表现。这种情况下，行为表现的缺失是纯正不作为犯的特点。例如，雇主未履行雇佣合同义务，导致雇员遭受损害，虽然雇主没有直接进行伤害行为，但由于违反了雇佣合同的义务，导致了损害结果。 3. **故意或过失**：犯罪行为的主体必须有故意或过失。例如，雇主知道或应当知道雇员因未履行合同义务而遭受损害，但仍故意不履行合同，或者由于疏忽大意导致未履行合同，均属于故意或过失。 4. **法律规定的其他条件**：根据不同的法律规定，可能还需要满足其他特定的条件…	纯正不作为犯是指法定情形下，公民或者单位依法应当采取救助措施的，明知他人处于危险状态而不采取救助措施，致使他人遭受重大伤害或者死亡的行为。其构成条件包括：1. 公民或者单位应当采取救助措施的法定情形；2. 明知他人处于危险状态；3. 不采取救助措施；4. 他人遭受重大伤害或者死亡。举例来说，如果有人看到一名溺水者却不进行救援，导致溺水者死亡，那么就构成纯正不作为犯。	a	b
什么是寻衅滋事罪的客观方面	寻衅滋事罪是指无事生非，起哄闹事，进行扰乱破坏，情节恶劣的行为。客观方面具体表现为下列行为之一：随意殴打他人，情节恶劣的；追逐、拦截、辱骂、恐吓他人，情节恶劣的；强拿硬要或者任意毁损、占用公私财物，情节严重的；在公共场所起哄闹事，造成公共场所秩序严重混乱的。	寻衅滋事罪是中国刑法中的一项罪名，根据《中华人民共和国刑法》第247条的规定，寻衅滋事罪的客观方面是指故意以非法占有财物为目的，通过欺诈、抢夺、诈骗、敲诈勒索、骗取救助、非法交易受益、非法经营等方式，侵犯他人财产权利的行为。 具体来说，寻衅滋事罪包括以下几个方面： 1. 欺诈：通过虚构事实、隐瞒真相等手段，骗取他人财物。 2. 抢夺：以暴力、威胁等手段，非法占有他人财物。 3. 诈骗：通过虚构假情节，欺骗他人交出财物。 4. 敲诈勒索：以暴力、威胁等手段，非法索取他人财物。 5. 骗取救助：通过虚构困难情况，骗取救助资金。 6. 非法交易受益：通过非法手段，参与赌博、彩票等活动，非法获利。 7. 非法经营：开设非法的商业活动，侵犯他人合法权益。 这些行为都属于寻衅滋事罪的客观方面，根据行为的严重程度和造成的后果，可能会被追究刑事责任。	寻衅滋事罪的客观方面是指行为人实施的行为必须具备明显的寻衅滋事行为，主要包括故意挑衅他人，制造纷争，造成社会秩序混乱等。举例来说，如果某人在公共场所大声辱骂他人，引发他人不满并发生冲突，这种行为就构成了寻衅滋事罪的客观方面。	b	b
什么是宅基地使用权的特征	宅基地使用权是指农村集体经济组织成员因建造自有房屋而依法对集体所有的土地享有的占有、使用的权利，是我国特有的一种用益物权。宅基地使用权的特征在于：宅基地使用权的主体限于农村集体经济组织成员。宅基地使用权的内容限于建造、保有住宅及其附属设施。宅基地使用权的客体限于集体所有的土地，换言之，宅基地的所有权归集体。宅基地使用权的取得是无偿的且没有期限限制，故该权利具有福利性。	宅基地使用权是指农村居民在其家庭成员中传承的，用于个人住宅建设和生活需要的土地使用权。这种使用权通常与农用地使用权相结合，具有以下特征： 1. 传承性：宅基地使用权可以在家庭成员之间传承，通常是按照家庭成员的比例进行传承的。例如，如果一个家庭有多个子女，宅基地使用权可能会根据家庭成员的比例进行分配。 2. 非商业性：宅基地主要用于个人住宅和生活需要，不允许用于商业活动。例如，不能在宅基地上开设商店或工厂。 3. 土地使用限制：宅基地的使用范围和方式受到法律的限制。例如，宅基地上不能进行土地转让，除非是按照法律规定的方式进行。 4. 土地保护性：为了保护农村的生态环境和农田的使用，宅基地的使用权可能会受到一定的限制。例如，宅基地上不能进行大规模的建筑活动，必须符合当地的规划和建设标准。 5. 土地使用权的终身制：宅基地使用权通常与土地所有权相结合，持有者在其生前可以自由使用，但在其去世后，…	宅基地使用权是指国家对农村宅基地的使用权进行划分和确认，并给予农村集体经济组织或农户的权利。其特征包括： 1. 使用权的稳定性和不可转让性：宅基地使用权不可买卖、赠与、抵押、租赁，只能由使用者和继承人享有。 2. 土地所有权和宅基地使用权分离：宅基地使用权只是土地使用权的一种形式，土地所有权属于国家或集体所有，而宅基地使用权是以土地为基础的特定使用权。 3. 宅基地使用权的期限：根据《中华人民共和国宅基地条例》，宅基地使用权期限一般为30年至70年不等，可以根据需要延长。 4. 用途限制：宅基地使用权必须用于建设住宅和相应的生产生活设施，不得改变土地用途。 5. 国家对宅基地使用权的保护：国家法律保护宅基地使用权不受侵犯，确保使用者的合法权益。 举例：根据《宅基地管理办法》，宅基地使用权可以通过申请、认定、登记等程序进行确认，确保农村居民的居住权益得到保障。 。	a	a
什么是民法典侵权责任编中连带责任的适用情形	民法典侵权责任编中连带责任的适用情形：实施共同侵权行为；教唆、帮助他人实施侵权行为；实施共同危险行为；叠加的数人侵权行为，即二人以上分别实施侵权行为造成同一损害，每个人的侵权行为都足以造成全部损害的，行为人承担连带责任；（累积因果关系）法律直接规定数个责任主体承担连带责任的其他情形	民法典侵权责任编中连带责任的适用情形主要包括以下几种情况： 1. **共同侵权行为**：当两个或多个行为人共同实施了侵权行为，导致了损害结果时，他们之间可以根据侵权行为的性质和责任程度承担连带责任。例如，A和B共同驾驶汽车撞伤了C，根据《民法典》的规定，A和B可以被要求共同赔偿C的损失。 2. **管理不善导致损害**：当管理人由于疏忽大意未能妥善管理事务，导致第三人受到损害时，管理人和受益人可以被要求承担连带责任。例如，B作为A的子女，A未能妥善管理家庭财产，导致财产损失，A和B可以被要求共同赔偿损失。 3. **授权行为导致损害**：当授权人授权他人进行某项行为，而该行为导致第三人受到损害时，授权人和被授权人可以被要求承担连带责任。例如，A授权B进行某项工程，而B在施工过程中违反安全规定导致C受伤，A和B可以被要求共同赔偿C的损失。 4. **违反法定义务导致损害**：当个人或单位违…	民法典侵权责任编中规定了连带责任的适用情形，主要包括以下几种情形： 1. 多人共同侵权，导致被侵权人受到损害，每个侵权人都应当承担连带责任； 2. 同一侵权行为导致多人受到损害，侵权人应当对所有被侵权人承担连带责任； 3. 侵权人与其他责任人之间存在连带关系，例如共同实施侵权行为的主观故意或者重大过失； 4. 依法承担连带责任的责任人，可以向其他承担连带责任的责任人追偿。 举例来说，如果几个人共同驾驶一辆车发生交通事故，导致他人受伤，那么每位驾驶者都应当对受伤人承担连带责任。	b	b
什么是犯罪未遂的特征与类型	犯罪未遂，指已经着手实行犯罪，由于犯罪分子意志以外的原因而未得逞的形态。犯罪未遂是犯罪未完成形态之一。犯罪未遂具有三个特征：行为人已经着手实行犯罪，犯罪未得逞，犯罪未得逞是由于犯罪分子意志以外的原因造成的。犯罪未遂形态可以划分为两类：以犯罪实行行为是否完成为标准，分为实行终了的未遂与未实行终了的未遂。以实行行为能否达到犯罪既遂为标准，分为能犯未遂与不能犯未遂。	犯罪未遂是指犯罪行为尚未完成，未达到犯罪结果的行为。根据《中华人民共和国刑法》第十九条的规定，犯罪未遂应当依照其本意所追求的犯罪结果的性质和严重程度，根据刑法的规定，给予处罚。 犯罪未遂的特征主要包括以下几点： 1. 行为未完成：犯罪未遂的行为尚未达到犯罪的完成状态，未能产生预期的犯罪结果。 2. 本意未遂：犯罪未遂的行为人本意是要达到犯罪的结果，但由于客观原因未能实现。 3. 可能性：犯罪未遂的行为如果没有被阻止，可能会导致犯罪的完成。 犯罪未遂的类型主要包括以下几种： 1. 行为未遂：行为人未能实施犯罪行为，或者实施的行为未能达到犯罪的完成状态。例如，准备盗窃但未能进入被盗窃物品所在的房间。 2. 结果未遂：行为人实施了犯罪行为，但由于客观原因未能达到犯罪的结果。例如，杀人未成，但行为人本意是要杀人。 3. 本意未遂：行为人实施了犯罪行为，但其本意并非要达到犯罪的结果。例如，出于误解…	犯罪未遂是指犯罪分子明知其行为具有犯罪特征，但由于各种原因未能完成犯罪行为的情形。犯罪未遂的特征包括：明知其行为具有犯罪特征、自觉地实施了犯罪行为、未达到犯罪的预定结果。犯罪未遂根据犯罪主体的故意和行为的进展程度可分为完全未遂和不完全未遂。完全未遂是指犯罪分子实施了犯罪行为，但由于自身原因或外部原因未能达到犯罪的预定结果；不完全未遂是指犯罪分子明知其行为具有犯罪特征，但由于幸运或他人的阻止等原因未能完成犯罪行为。 举例来说，如果一名盗窃者进入他人住宅准备实施盗窃行为，但在实施过程中被屋主发现并报警，导致盗窃行为未能完成，这就属于犯罪未遂。而如果盗窃者在进入住宅后发现屋主在家，便放弃了盗窃行为，这就是不完全未遂。 。	b	b
什么是逃税罪的构成要件	逃税罪是指纳税人采取欺骗、隐瞒手段进行虚假的纳税申报或者不申报，逃避缴纳税款数额较大并且占 应纳税额 10%以上或者扣缴义务人采取欺骗、隐瞒手段，不缴或少缴已扣、已收税款，数额较大的行为。逃税罪的构成要件有：逃税罪的客体是国家的税收征管制度。逃税罪的客观方面表现有两种：第一种，纳税人采取欺骗、隐瞒手段进行虚假纳税申报或者不中报，逃避缴纳税款数额较大并且占应纳税额 10%以上。第二种，扣缴义务人采取欺骗、隐瞒手段，不缴或者少缴已扣、已收税款， 数额较大。逃税罪的主体是纳税人和扣缴义务人，既可以是自然人，也可以是单位。逃税罪的主观方面是故意。	逃税罪是指违反税收法律、行政法规，故意未缴或少缴税款，或者故意低报应纳税额，情节严重的行为所构成的犯罪。构成要件主要包括以下几个方面： 1. 违反税收法律、行政法规：逃税罪的行为必须是违反了中国的税收法律和行政法规，包括但不限于《中华人民共和国税收征收管理法》等相关法律。 2. 故意未缴或少缴税款，或者故意低报应纳税额：逃税罪的行为必须是出于故意，包括故意未缴、少缴税款或者故意低报应纳税额。故意在这里指的是行为人有明知的违法意图。 3. 情节严重：逃税罪的构成要件还需要情节严重。情节严重的标准通常是根据税款的金额或者其他相关因素来判断的。例如，税款金额较大，或者逃税行为对国家税收收入造成了显著损失，都可以被认为是情节严重。 举例来说，如果某企业在会计报表中虚报收入，低报应纳税额，导致国家税务机关损失了大量税收，这样的行为可能构成逃税罪。	逃税罪的构成要件包括以下几点： 1. 主体必须是纳税人，即具有纳税义务人的身份； 2. 主体故意实施逃避纳税行为，包括隐瞒应纳税款项、虚报应纳税款项、伪造凭证等； 3. 逃税数额达到一定标准，具体标准根据不同的法规而有所不同； 4. 行为必须触犯了相关的法律法规，例如《中华人民共和国税收征收管理法》等。 举例：小明在个人所得税报税时故意隐瞒一部分收入，导致逃税数额超过法定标准，构成逃税罪。 。	a	a
什么是民事法律行为的含义和特征	犯罪未遂，指已经着手实行犯罪，由于犯罪分子意志以外的原因而未得逞的形态。犯罪未遂是犯罪未完成形态之一。犯罪未遂具有三个特征：行为人已经着手实行犯罪，犯罪未得逞，犯罪未得逞是由于犯罪分子意志以外的原因造成的。犯罪未遂形态可以划分为两类：以犯罪实行行为是否完成为标准，分为实行终了的未遂与未实行终了的未遂。以实行行为能否达到犯罪既遂为标准，分为能犯未遂与不能犯未遂。	民事法律行为是指自然人、法人或其他组织通过法律允许的方式，表达其民事权利和义务的行为。民事法律行为的含义和特征主要体现在以下几个方面： 1. 主体资格：民事法律行为的主体是具有民事权利和义务能力的自然人、法人或其他组织。例如，成年人、法定代理人、法人和其他组织都可以作为民事法律行为的主体。 2. 行为形式：民事法律行为可以是书面形式，也可以是口头形式，甚至是默示形式。例如，签订合同、出具证明、默示承认等都属于民事法律行为。 3. 行为内容：民事法律行为的内容应当明确，能够表达主体的民事权利和义务。例如，合同中的订约内容、赠与的物品等。 4. 法律效力：民事法律行为一旦符合法律规定的条件和形式，应当产生法律效力。例如，合同一旦签订，双方都应当履行合同义务。 5. 行为的有效性：民事法律行为的有效性取决于行为的合法性和合理性。例如，合同如果违反法律规定或者违背公序良俗，可能会被认定为无效。 …	民事法律行为是指民事主体依法进行的意思表示或者意思表示的结果，通过这种行为产生、变更、转移、终止民事法律关系。民事法律行为的特征包括自愿性、双方意思一致、合法性、真实性、效力等。例如，合同是一种典型的民事法律行为，当各方自愿达成一致意见，并且符合法律规定的条件时，合同即具有法律效力。	a	a
什么是用益物权与担保物权的区别。	用益物权是指权利人对他人所有的不动产或者动产依法享有的占有、使用和收益的权利。担保物权是指以确保债务清偿为目的，而在债务人或者第三人的特定物或者权利上设定的定限物权。用益物权与担保物权的主要区别是：用益物权以使用收益为目的；担保物权以担保债的实现为目的。用益物权的客体为有体物；担保物权的客体除有体物外，还包括权利。用益物权的客体具有使用价值；担保物权的客体具有交换价值。用益物权为独立性权利；担保物权为从属性权利。用益物权人取得用益物权时即可实现其权利；担保物权人取得担保物权后，只有在所担保的债权未获得清偿时才可行使变价受偿权。用益物权的设立以占有标的物为条件；担保物权的设立，除质权和留置权外，其他担保物权以占有标的物为条件。用益物权不具有物上代位性；担保物权具有物上代位性。	用益物权和担保物权都是物权法中的特殊物权，它们都与物品的使用和处置有关，但它们的性质和目的不同。 用益物权是指权利人对他人物品的使用和处置享有特定的权利，通常是为了权利人的利益。用益物权的设立，旨在保障权利人在使用他人物品时的合法权益。例如，租赁关系中的租赁人对租赁物品的使用权利就是用益物权。租赁人在租赁期间可以使用租赁物品，但不能对其进行处置，如转租或处分。 担保物权则是指权利人对他人物品的使用和处置权，以保证债权的履行。担保物权的设立，主要是为了保障债权人的债权。例如，抵押权是最常见的担保物权之一，当债务人未能履行债务时，债权人可以通过对抵押物进行处置来实现债权的收回。抵押物的使用和处置权是由债权人享有，以担保债务的履行。 总结来说，两者都涉及对他人物品的使用和处置，但用益物权是为了权利人的利益，而担保物权是为了保障债权人的债权。用益物权的使用和处置通常不涉及债务的履行问题，而担保物…	用益物权是指权利人对特定不动产的使用和收益权利，而不是所有权。例如，租赁房屋的权利就是一种用益物权。担保物权是指债务人将其所有或者部分财产设立为担保债权人的债权，以便在债务人不履行债务时，债权人可以依法优先以该财产实现债权。例如，房屋抵押贷款中的抵押物权就是一种担保物权。 用益物权与担保物权的区别在于，用益物权是权利人对特定不动产的使用权利，而担保物权是为了担保债权而设立的权利，当债务人不履行债务时，债权人可以依法优先以抵押财产实现债权。用益物权更侧重于权利人的使用和收益，而担保物权更侧重于债权人的债权保障。	a	b
中国刑法对死刑适用的限制是怎么样的?	死刑适用的条件为：死刑只适用于罪行极其严重的犯罪分子。罪行极其严重，是犯罪的性质极其严重、犯罪的情节极其严重和犯罪分子的人身危险性极其严重三方面的统一。犯罪的时候不满 18周岁的人与审判的时候怀孕的妇女，不适用死刑；审判的时候已满 75周岁的人，除以特别残忍手段致人死亡的外，不适用死刑。死刑立即执行案件除依法由最高人民法院判决的以外，都应当由最高人民法院核准。对于应当被判处死刑的犯罪分子，如果不是必须立即执行的，可以判处死刑同时宣告缓期两年执行。被判处死缓的犯罪分子，只有在死刑缓期执行期间故意犯罪才执行死刑，从而减少了实际执行死刑的数量。	中国刑法对死刑的适用有明确的限制和规定。根据《中华人民共和国刑法》的相关规定，死刑是对犯罪行为最严厉的刑罚，适用于犯罪行为极其严重的情况。具体来说，死刑的适用受到以下限制： 1. **犯罪情节严重**：死刑仅适用于犯罪情节极其严重的案件，例如故意杀人、重大爆炸、放火、投毒等造成严重后果的犯罪。 2. **审判程序**：死刑案件的审判必须经过严格的程序，包括审判委员会的审查和最高人民法院的核准。审判过程中还必须保证法律程序的合法性和公正性。 3. **复核制度**：死刑案件的判决在执行前还需要经过最高人民法院的复核。复核过程中，会对案件的法律适用、证据确凿性、判决合理性等方面进行审查。 4. **执行前的复核**：在执行死刑前，还需要经过最高人民法院的复核，并且必须在执行前24小时内向最高人民法院报告。 5. **执行方式**：死刑的执行方式必须符合法律规定，通常是枪决，但也可以根据法律规…	根据中国刑法，死刑适用的限制包括：必须是犯罪行为极为严重，危害极为严重的罪行，如故意杀人、强奸、抢劫等；必须是属于法定死刑罪名之一，不得随意扩大适用死刑的范围；必须是有法定的证据证明罪行的，不能凭空判决；必须经过严格审判程序，包括一审、二审和最高法院的复核等程序；必须经过最高人民法院的核准；必须符合公正、合法和程序正义等原则。 举例来说，如果有人因为盗窃一万元人民币被判处死刑，这显然是不符合死刑适用的限制的，因为盗窃不属于法定死刑罪名之一，而且金额也不足以被视为危害极为严重的罪行。 。	a	a
什么是合同的相对性?	合同的相对性，是指合同关系只存在于特定的当事人之间，合同对第三人没有约束力。合同的相对性具体体现在：合同主体的相对性。合同关系只存在于特定的主体之间，只有合同当事人才能享有合同权利，也只有合同当事人才需承担合同义务。合同内容的相对性。除法律另有规定或当事人另有约定外，合同的权利义务只能由当事人享有和承担，第三人不享有合同权利，也不承担合同义务。合同责任的相对性。合同责任只存在于特定的当事人之间，合同关系以外的人不负违约责任，违约方也无需对合同关系以外的人承担违约责任。合同虽以相对性为原则，但也存在合同相对性的例外。主要包括：租赁权的物权化。合同保全。为第三人利益的合同。经过登记的债权具有物权效力。第三人侵害债权制度。	合同的相对性是指合同是由两个或两个以上的当事人之间依法约定权利和义务的法律关系。这种相对性体现在合同的效力和履行上，意味着合同双方都有权益和义务，各自对等地享有权利、承担义务。相对性是合同法基本原则之一，体现了合同法保护当事人合法权益的目的。 例如，在买卖合同中，卖方有义务将商品按约定交付给买方，而买方则有义务按约定支付价款。只有当双方都履行了自己的义务，合同关系才得以实现。 在实际操作中，如果一方不履行合同义务，另一方可以依法请求履行或者解除合同，并且可以依照合同条款和法律规定追究违约责任。	合同的相对性指的是合同的效力只对合同当事人双方产生法律效果，而不涉及第三人。合同的内容和履行义务只对合同双方具有约束力，第三人不能要求合同的执行或者参与合同的变更。这是因为合同主体具有独立性和相对性原则，合同是基于当事人的意思表示而成立的，只有当事人之间的权利和义务是相互关联的。 举例来说，甲与乙签订了一份借款合同，合同约定甲向乙借款10000元，乙应在一年内归还本金和利息。在合同中并没有提及丙，即第三人。如果丙要求参与合同或者要求乙归还借款，是不符合合同相对性原则的。 .	a	a
什么是刑法中法条竞合的概念及其处理原则。	刑法中的法条竞合，是指行为人实施一个犯罪行为，同时触犯数个在犯罪构成上具有包容关系的刑法规范，只适用其中一个刑法规范的情况。对法条竞合的处理原则是：特别法优于普通法，适用特别法条排斥普通法条；在法律有特别规定的情形下，依法律规定。	法条竞合是指在刑法中，两个或多个法律条文在同一案件中产生冲突或相互制约的情况。这种情况可能发生在同一法律条文的不同部分之间，或者在不同法律条文之间。例如，一个法律条文规定了某种行为的刑事责任，而另一个法律条文则对同一行为提供了豁免或减轻处罚的规定。 刑法中处理法条竞合的原则主要有以下几点： 1. **优先适用原则**：在法条竞合的情况下，通常会优先适用更具体、更详细的法律条文。例如，如果一个法律条文明确规定了某种行为的刑事责任，而另一个条文则是更为宽泛的规定，那么在具体情况下，应优先考虑更具体的条文。 2. **特殊情况优先原则**：如果有特别的法律规定或者司法解释明确指出在某些特殊情况下应适用特定的法律条文，那么应优先考虑这些特殊规定。 3. **保护性原则**：在法条竞合的情况下，应选择保护人身权利和社会公共利益的法律条文。例如，如果一个法律条文保护了个人隐私，而另一个条文则要求公开…	刑法中的法条竞合是指在一个犯罪事实涉及到多个刑法条款时，不同的法条可能都适用于该犯罪行为，但应当根据具体情况选择适用的法条进行定罪和量刑。 处理竞合法条的原则主要有以下几点： 1. 优先适用特别法原则：当一个犯罪行为同时触犯了普通刑法和专门刑法时，应当优先适用专门刑法的规定。 2. 适用最严格法原则：当不同的法条对同一犯罪行为规定了不同的处罚，应当适用处罚最严格的法条。 3. 适用特别规定原则：当一个犯罪行为同时符合通用规定和特别规定时，应当优先适用特别规定。 4. 适用最有利原则：当不同的法条对被告人有利时，应当选择适用最有利于被告人的法条。 举例来说，如果某人盗窃了一辆汽车，根据刑法规定，盗窃罪的处罚是三年以下有期徒刑、拘役或者管制。但是如果同时触犯了交通安全法，那么根据交通安全法规定，盗窃汽车还可能构成危险驾驶罪，处罚更重。在这种情况下，应当优先适用交通安全法的规定。	b	a
什么是食品监管渎职罪的构成要件。	食品监管渎职罪的构成要件为： 客体为国家食品安全监督管理制度；客观方面为实施了滥用职权或者玩忽职守的行为，导致发生重大食品安全事故或者造成其他严重后果； 主体为特殊主体，是指负有食品安全监管职能的国家机关工作人员；主观方面为故意或过失。	食品监管渎职罪是指在食品安全监督管理工作中，公务员、工作人员因渎职、玩忽职守或者滥用职权，导致食品安全发生严重后果的犯罪行为。构成要件主要包括以下几个方面： 1. 行为人：食品监管渎职罪的行为人通常是食品安全监督管理部门的工作人员，包括政府机关、监管机构、检验检测机构等的工作人员。 2. 职务行为：行为人在履行食品安全监督管理职责时，包括但不限于监督检查、检验检测、信息发布、行政处罚等方面的行为。 3. 渎职、玩忽职守或滥用职权：行为人在履行职责时，存在以下情况之一： - 渎职：指行为人在食品安全监督管理工作中，未能履行职责，导致食品安全管理不力。 - 玩忽职守：指行为人在食品安全监督管理工作中，明知或者应知有食品安全风险，但不履行职责或者不当履行职责，导致食品安全风险未得到有效控制。 - 滥用职权：指行为人在食品安全监督管理工作中，利用职务上的便利，侵犯他人权利或利益，或者为自己或他人…	食品监管渎职罪是指食品监管部门工作人员在履行食品监管职责中，有故意或者重大过失，导致食品安全事故发生或者严重危害公共健康的行为。其构成要件包括：1.食品监管部门工作人员具有监督管理食品安全的职责；2.工作人员在履行监管职责时存在故意或者重大过失行为；3.该行为导致食品安全事故发生或者严重危害公共健康。例如，如果一个食品监管部门工作人员明知某企业生产的食品存在安全隐患，但故意放任不管或者未采取有效监管措施，最终导致食品安全事故发生，那么就构成食品监管渎职罪。	b	b
什么是共同危险行为的构成要件。	共同危险行为的构成要件包括：二人以上都实施了危及他人人身、财产安全的行为；行为人之间事先没有共同的意思联络；损害已经发生，并与某一人或数人实施的危险行为之间有因果关系；加害人不明，即无法确定何人的行为实际造成了损害后果。	共同危险行为是指多人共同参与的行为，存在共同的危险性，且每个人都知道这种行为可能导致特定的危害结果，但仍然共同参与该行为。构成共同危险行为的要件主要包括： 1. 多人共同参与：共同危险行为需要有两个或两个以上的人共同参与，这些人可以是同伙、朋友或者其他关系。 2. 共同的危险性：参与人员必须意识到他们的行为可能会对他人造成伤害或损失。 3. 知情参与：每个参与者都必须知道行为可能导致的危害结果，并且意识到这种行为存在危险性。 4. 共同行为：参与者们必须在一定程度上协同或配合，共同实施了危险行为。 举例来说，如果有多个人一起策划并实施了一次抢劫，且每个人都知道这次行动可能会导致受害者受到伤害，那么这些人都可以被认定为共同危险行为的参与者。 根据《中华人民共和国刑法》第六十四条的规定，共同犯罪的犯罪责任主体是共同犯罪的犯罪行为和犯罪结果的共同体。因此，对于共同危险行为的参与者，应当根据其在…	共同危险行为是指多人共同实施或者协同实施的危险行为，构成要件包括： 1. 多人共同实施或者协同实施：即两个或以上的人共同参与危险行为，可以是同时实施，也可以是相互协助实施。 2. 实施的行为具有危险性：即实施的行为可能会对他人的人身、财产安全造成危害。 3. 共同危险行为的主体必须是故意的，即行为人主观上必须有实施危险行为的故意。 举例来说，如果多人一起在公共场所放鞭炮，这种行为具有危险性，可能会引发火灾，危害他人的安全，因此构成共同危险行为。	tie	tie
什么是遗赠和遗赠扶养协议的区别。	遗赠是单方法律行为，而遗赠扶养协议是双方法律行为；遗赠是单务、无偿的法律行为，而遗赠扶养协议是双务、有偿的法律行为；遗赠是死因行为，而遗赠扶养协议是生前行为与死因行为的结合；遗赠扶养协议中的扶养人必须是具有完全民事行为能力的自然人或集体组织，而遗赠中的受遗赠人不受此限； 5.遗赠中的受遗赠人必须在法定期限内作出接受遗赠的明确意思表示，否则视为放弃受遗赠权，而遗赠扶养协议中的扶养人无须在遗嘱人死亡后作出接受遗赠的意思表示，即可以直接依协议取得遗产。	遗赠和遗赠扶养协议都是涉及遗产处理的法律概念，但它们在目的和内容上有所区别。 遗赠是指在遗嘱中，死者将其财产赠与生前指定的个人或机构。遗嘱是死者在死亡前制定的法律文件，用于明确其遗产的分配方式。遗赠的内容可以是现金、房产、股票、债权等任何形式的财产。遗赠的受益人通常是死者的亲属、朋友或其他指定的个人。 遗赠扶养协议则是指在遗嘱中，死者为其扶养关系的亲属（如配偶、子女、父母等）设立的扶养基金。这种协议的目的是为了确保这些亲属在死者去世后仍能得到经济上的支持和照顾。遗赠扶养协议通常会设定具体的扶养期限和金额，确保扶养关系人在特定时间内能够获得一定的经济援助。 举例来说，如果某人在遗嘱中明确指出其配偶每年应获得一定金额的生活费支助，直至其再婚或去世，这就是遗赠扶养协议的体现。而如果某人在遗嘱中仅仅指定其子女每人获得一定的现金遗产，那么这就是遗赠。 总之，遗赠是对财产的赠与，而遗赠扶养协议则是对…	遗赠是指遗嘱人在遗嘱中对其财产的处置安排，包括确定遗产继承人、遗产分配比例等内容，是遗嘱人对自己的财产进行安排的行为。而遗赠扶养协议是指遗赠人在遗赠的同时，与受益人签订的一种协议，约定了在遗赠人生前受益人扶养的事项，例如支付一定的生活费用、医疗费用等。遗赠扶养协议是一种更加具体和特殊的遗赠形式，主要是为了保障被遗赠人在遗赠人生前的生活和其他方面的需求。 举例来说，如果甲在遗嘱中规定将自己的房产分给儿子乙，并且与乙签订了遗赠扶养协议，约定在甲生前由甲扶养乙的生活费用，那么这就是遗赠和遗赠扶养协议同时存在的情况。 。	b	a
什么是累犯的构成条件。	累犯是指因犯罪受过一定刑罚处罚，刑罚执行完毕或者赦免以后，在法定期限内再犯一定之罪的犯罪人。我国刑法规定的累犯可分为一般累犯和特别累犯。一般累犯的构成条件是：犯罪发生时，犯罪人已满 18周岁； (2)前罪和后罪都是故意犯罪；(3)前罪被判处有期徒刑以上刑罚，后罪也应被判处有期徒刑以上刑罚； (4)后罪发生在前罪的刑罚执行完毕或者赦免以后 5 年以内。特别累犯的构成条件是：前罪和后罪都是危害国家安全犯罪、恐怖活动犯罪或者黑社会性质的组织犯罪； (2)前罪被判处的刑罚和后罪应当被判处的刑罚种类及其轻重不受限制；(3)因危害国家安全犯罪、恐怖活动犯罪或黑社会性质的组织犯罪被判处刑罚，在刑罚执行完毕或者赦免以后，任何时候再犯上述犯罪。	累犯是指犯罪人在一定时间内，多次犯同类罪行，且每次犯罪行为都构成犯罪，根据《中华人民共和国刑法》第五十四条的规定，累犯的构成条件主要包括以下几点： 1. 犯罪人在刑罚执行完毕后，或者刑罚被缓则自缓刑期满，或者因犯罪被判处拘役一年以下或者拘役加罚金、拘役加罚金并处罚金的刑罚，或者被判处管制、罚金、剥夺政治权利的刑罚后，重新犯同一类别的罪行。 2. 该类别的罪行是指同一类别的犯罪，如抢劫罪、盗窃罪、诈骗罪等。 3. 该类别的罪行每次都构成犯罪，即每次犯罪行为都应当受到法律的惩处。 累犯的法律后果是，累犯人在被判处刑罚后，若再次犯同类罪行，应当按照累犯的规定，判处其原刑罚加重的刑罚。例如，如果累犯人被判处有期徒刑五年以上，并且再次犯同类罪行，应当判处原刑罚加重的有期徒刑十年以上。 例如，某人因盗窃罪被判处有期徒刑三年，刑罚执行完毕后，两年后该人再次因盗窃罪被判处有期徒刑五年，根据累犯的规定，应…	累犯是指一个人在已经有过犯罪前科的情况下，再次犯罪的行为。根据我国刑法的规定，累犯的构成条件包括两点：一是在判决作出前已经有犯罪记录；二是在犯罪记录确定的情况下再次犯罪。只有同时满足这两个条件，才能被认定为累犯。 举例来说，如果某人在被判定为盗窃罪之后，再次犯下盗窃罪行为，那么他就属于累犯。	b	b
什么是民事权利的私力救济。	民事权利的私力救济，是指民事权利受到侵害时，权利人在法律规定的限度内，自己采取必要的措施保护其权利的行为。民事权利的私力救济措施包括两类：自卫行为。自卫行为是指当民事权利受到侵害或者有受到侵害的现实危险时，权利人采取必要的措施，以防止损害的发生或者扩大的行为。自卫行为有正当防卫和紧急避险两种形式。正当防卫是指为了保护本人或者他人的民事权益或者公共利益，对于现实的不法侵害采取的防卫行为。其成立条件包括：有现实的不法侵害发生、防卫对象只能是不法侵害人、防卫目的是为了保护本人或他人的合法民事权益或公共利益、不得超过必要的限度。紧急避险是指为了避免本人或者他人的民事权益或者公共利益受到紧迫的危险所采取的避险行为。其成立条件包括：有紧迫现实的危险存在、该危险关系到本人或他人的民事权益或公共利益、方法适当、不得超过必要的限度。自助行为。自助行为是指权利人为保护自己的权利，在来不及请求公力救济的情况下…	民事权利的私法救济是指当事人在自己的名义下，通过法律规定的途径和方式，直接向侵害其民事权利的对方主体提出诉求，以实现权利的恢复、损失的赔偿或其他合法利益的实现。私法救济主要包括诉讼救济和非诉讼救济两种形式。 诉讼救济是指当事人通过法院或仲裁机构提起诉讼，依法请求判决或裁决。例如，根据《中华人民共和国民法典》第六百零二条规定，当事人因合同履行发生争议，可以向人民法院提起诉讼。诉讼救济的特点是通过法律程序的判决或裁决来解决争议，具有强制力和终局性。 非诉讼救济则是指当事人通过协商、调解、仲裁等方式解决争议。例如，根据《中华人民共和国民事诉讼法》第五十九条规定，当事人可以通过协商解决争议，也可以请求人民法院或者仲裁机构进行调解。非诉讼救济的特点是当事人之间通过自愿协商或第三方介入的方式解决争议，具有灵活性和便捷性。 总之，民事权利的私法救济是当事人在自己的名义下，通过诉讼和非诉讼两种方式，依法…	民事权利的私力救济是指当公民、法人或者其他组织的民事权利受到侵害时，可以通过自己的力量采取合法手段进行维护的行为。私力救济通常包括采取民事诉讼、仲裁、和解等方式来维护自己的权益，而不通过政府机构或者司法机关的介入。例如，受到合同违约的侵害时，当事人可以选择通过起诉对方追究责任，或者达成和解协议等方式来维护自己的权益。	a	a
什么是刑法中危害结果的分类。	根据不同的标准，刑法中危害结果可分为：以危害结果是否是犯罪的构成要件为标准，分为构成要件的结果和非构成要件的结果。以危害结果的现象形态为标准，分为物质性结果和非物质性结果。以危害行为和危害结果之间的关联方式为标准， 分为直接结果和间接结果 。以危害结果的表现形式为标准，分为实害结果和危险结果。以危害结果的严重程度及其意义为标准，分为标准的犯罪构成结果和派生的犯罪构成结果。	在刑法中，危害结果的分类主要是根据犯罪行为对社会的危害程度和性质来区分的。通常，危害结果可以分为以下几种类型： 1. 身体伤害：这类危害结果包括对个人身体造成的损害，如死亡、残疾、健康受损等。例如，交通肇事导致他人死亡的行为，根据刑法的规定，可能构成故意杀人罪。 2. 财产损害：这类危害结果涉及对个人或集体财产的损失，如财产的毁坏、盗窃、侵占等。例如，故意毁坏他人财产的行为，可能构成故意损毁财物罪。 3. 信息安全损害：随着信息技术的发展，这类危害结果变得越来越重要。包括个人隐私泄露、数据被非法获取或篡改等。例如，未经授权擅自获取他人个人信息的行为，可能构成侵犯个人信息罪。 4. 环境污染：这类危害结果主要是对自然环境造成的损害，如空气、水体、土壤污染等。例如，企业在生产过程中排放超过标准的污染物，可能构成环境污染罪。 5. 社会秩序和公共安全：这类危害结果包括对社会秩序和公共安全造成的…	刑法中危害结果可以分为直接危害和间接危害两种分类。直接危害是指犯罪行为直接导致的危害结果，例如故意杀人导致的死亡。间接危害则是指犯罪行为间接导致的危害结果，例如醉酒驾驶导致的交通事故造成他人受伤或死亡。根据不同的危害结果，犯罪行为的性质和刑事责任也会有所不同。 举例来说，根据《中华人民共和国刑法》第二十一条规定，故意犯罪行为造成严重后果的，将会被依法追究刑事责任。而对于间接危害的犯罪行为，法律也会根据实际情况对犯罪嫌疑人进行相应的定罪量刑。 .	b	b
什么是污染环境罪的构成要件。	污染环境罪的构成要件包括：客体是国家环境保护制度与公民生命健康、财产安全。客观方面要求具备三个条件：第一，违反了国家环境保护方面的法律、法规；第二，实施了排放、倾倒或者处置有放射性的废物、含传染病病原体的废物、有毒物质或者其他有害物质的行为；第三，严重污染环境。本罪的主体是一般主体，包括自然人和单位。本罪的主观方面为过失。	污染环境罪是指违反环境保护法律、行政法规，排放污染物或者其他行为导致环境污染，造成严重后果的行为。构成污染环境罪的要件主要包括以下几个方面： 1. 行为方面：首先，必须存在排放污染物或者其他导致环境污染的行为。例如，工业企业未经处理直接排放废水、废气，或者农业生产中未采取有效措施导致农药、化肥等物质流入水体、土壤等。 2. 违法性：排放污染物或者其他行为必须违反了环境保护的法律、行政法规。比如，排放的污染物超过了国家规定的排放标准，或者未按照规定进行环境影响评价。 3. 后果方面：污染行为导致的环境污染必须造成了严重后果。严重后果通常指的是对环境质量造成了长期或难以恢复的损害，或者对公众健康、生态系统、经济和社会造成了显著影响。例如，污染物导致水体、土壤、空气质量严重恶化，或者对人类健康造成了重大威胁。 4. 过错性：污染环境罪通常需要证明行为人有过错，即行为人应当知道自己的行为将导致环…	污染环境罪的构成要件包括：第一，实施排放、倾倒或者处置有毒、有害物质的行为；第二，造成环境污染或者其他严重后果；第三，主观上具有犯罪故意。其中，犯罪故意是指明知排放、倾倒或者处置的物质可能会造成环境污染或者其他严重后果，依然故意实施行为。例如，2019年，江苏省一家化工企业非法排放有毒废水，导致附近农田和水源受到污染，企业负责人因涉嫌污染环境罪被司法机关立案侦查。 .	a	a
什么是共同侵权行为的概念和构成要件。	共同侵权行为是指二人以上共同故意或者共同过失侵害他人，依法承担连带责任的行 为。其构成要件包含：行为人为二人以上。行为人既可以是自然人，也可以是法人或者其他组织。行为的关联性。共同侵权行为的数个行为人均实施了加害行为。这些行为结合在一起，形成一个有机整体，共同造成了损害后果。具有共同过错。共同过错既可以是共同的故意，也可以是共同的过失，还可以是故意和过失的混合。结果的单一性。共同侵权行为人实施的数个行为造成了同一损害结果，且该损害结果不可分割。	共同侵权行为是指多个行为人共同实施的侵权行为。根据中国的《民法典》，共同侵权行为的构成要件主要包括以下几个方面： 1. 侵权行为的共同实施：共同侵权行为是指多个行为人在一定的时间和空间内，通过共同的行为或不作为，造成了侵权结果。例如，多个司机共同驾驶一辆载有危险物品的货车，导致交通事故，造成人员伤亡和财产损失。 2. 侵权行为的主体：共同侵权行为的主体可以是自然人，也可以是法人或其他组织。例如，多个公司的员工共同参与了违反安全生产管理规定的行为，导致工厂发生火灾。 3. 侵权行为的客观结果：共同侵权行为的客观结果是指行为人共同造成的损害后果。例如，多个建筑工人共同违反建筑施工安全规范，导致建筑物倒塌，造成人员伤亡和财产损失。 4. 侵权行为的主观故意或过失：共同侵权行为的主观故意或过失是指行为人在实施侵权行为时是否存在故意或过失。例如，多个驾驶员故意超载并共同驾驶，导致道路交通事故。 5…	共同侵权行为是指两个或两个以上的主体共同实施侵权行为，致使被侵权人遭受损害的情形。构成共同侵权行为的要件包括：共同实施行为、共同侵权责任和共同损害结果。 共同实施行为是指多个主体一起实施侵权行为，共同对被侵权人造成损害。共同侵权责任是指在共同实施侵权行为的情况下，各侵权主体对被侵权人承担连带责任。共同损害结果是指被侵权人因多个主体的侵权行为而遭受损害，需要多个主体承担赔偿责任。 举例来说，如果A、B两人一起盗窃了C的财物，导致C遭受财产损失，那么A和B就构成了共同侵权行为，应当承担共同的赔偿责任。 .	b	b
什么是离婚与撤销婚姻的区别。	离婚与撤销婚姻的区别包括：对象与目的不同。离婚以合法婚姻为对象，目的是解除合法婚姻，撤销婚姻是以违法婚姻为对象，目的是否认婚姻的效力。法定事由不同。离婚的法定事由为夫妻感情确已破裂，撤销婚姻的法定事由仅限于受胁迫。请求权人不同。离婚请求权人可以是婚姻当事人的任何一方，而撤销婚姻的请求权人仅限于婚姻当事人中受胁迫的一方。请求权行使时间不同。在婚姻关系存续期间的任何时候均可请求离婚，而请求撤销婚姻只能自结婚登记之曰起 1年内提出，被非法限制人身自由的当事人请求撤销婚姻的， 应当自恢复人身自由之日起 1年内提出。溯及力不同。离婚没有溯及力，而撤销婚姻具有溯及力。	离婚和撤销婚姻是两种不同的法律状态，它们在法律上有着不同的含义和程序。 离婚是指当事人之间已经结婚，但由于各种原因（如感情破裂、不和、离异等）申请终止婚姻关系的法律程序。在中国，离婚需要通过法院审理，或者双方协商一致并提交给人民法院进行审批。离婚的申请可以是由一方提出，也可以是双方共同提出。离婚后，双方的婚姻关系将被正式终止。 撤销婚姻，又称为婚姻无效，指的是婚姻关系自始即未成立的状态。这种情况通常发生在婚姻成立时存在法律规定的障碍，比如双方未达成完全民事行为能力、双方之间存在直系亲属关系、婚姻登记时有欺骗或隐瞒真实情况等情况。撤销婚姻的申请通常由一方提出，并需要提供相应的证据来证明婚姻成立时存在的障碍。 举例来说，如果一对夫妇在婚姻登记时没有提供真实的身份信息，或者在婚前存在直系亲属关系，这样的婚姻关系可能会被认定为无效，需要撤销。 总之，离婚是指已经成立的婚姻关系的终止，而撤销婚姻是…	离婚是指夫妻一方或双方经法院审理，依照法定程序和条件解除婚姻关系的行为。而撤销婚姻是指因婚姻关系存在某种法定的瑕疵或违法情形，经法院审理裁定撤销婚姻关系的行为。离婚是因为夫妻感情破裂或其他原因导致不能继续维持婚姻关系，而撤销婚姻是因为婚姻存在某种法定的缺陷或违法情形，不符合法律规定的结婚条件。举例来说，如果一方在结婚时隐瞒了重要事实或者强迫结婚等情况，可能会导致婚姻被撤销。	tie	b
什么是刑法中紧急避险的成立条件。	紧急避险是指为了使国家、公共利益、本人或者他人的人身、财产和其他权利免受正在发生的危险，不得已而采取的损害另一较小合法权益的行为。紧急避险的成立条件是：行为人有避险的认识和目的。行为人应认识到危险正在发生，且只能用紧急避险的方法排除该危险；行为人避险的目的是为了使国家、公共利益、本人或者他人的人身、财产和其他权利免受正在发生的危险。合法权益遭受危险。危险是指某种有可能立即对合法权益造成危害的紧迫事实状态，其来源包括自然的力量、动物侵袭、非法侵害和人的生理、病理过程。该危险是客观存在的，而非主观假想的。危险正在发生或迫在眉睫，对合法权益形成了紧急的、直接的危险。如果危险尚未出现或者已经结束，行为人实施所谓的避险行为，则属于避险不适时。紧急避险的对象是第三人的合法权益。紧急避险不能超过必要限度。紧急避险造成的损害必须小于所避免的损害。紧急避险只能在不得已的情况下实施。不得已是指找不到其他合法…	紧急避险是中国刑法中的一个自卫行为的特殊情况，根据《中华人民共和国刑法》第20条规定，紧急避险是指为了避免对自己或他人、财产造成更大的危险，必须立即采取的行为。这种行为不构成犯罪，即使违反了法律规定，也应当不承担刑事责任。 紧急避险的成立条件主要包括以下几点： 1. 必要性：行为人必须面临一个迫在眉睫的危险，这个危险如果不采取紧急避险措施，可能会对自己或他人、财产造成更大的损害。 2. 合理性：采取的紧急避险措施必须是合理的，即必须是避免危险的最合适的方式。例如，如果有人在火灾中，跳窗逃生是合理的避险措施。 3. 有限性：紧急避险行为应当是有限制的，行为人应当尽量减少对他人财产的损害。例如，在紧急避险时，如果可能的话，应当尽量避免使用暴力或破坏财物。 4. 及时性：紧急避险行为应当是在危险发生时立即采取的，不得拖延。 举例来说，如果一个人在行驶中发现前车突然失控，自己必须采取紧急措施避免…	刑法中紧急避险是指为了防止现行危险侵害公民人身、财产或者其他合法权益，采取损害他人合法权益的行为，但是这种行为不应当危害社会公共利益，并且必须符合以下条件才能成立： 1. 紧急性：紧急避险所采取的行为必须是为了防止即将发生的危险，不能是预防未来可能发生的危险。 2. 无过当：紧急避险所采取的行为必须是对抗危险的必要手段，不能采取过度的手段，即不能超出必要的限度。 3. 公共利益优先：紧急避险虽然是为了保护个人合法权益，但不能危害社会公共利益，不能破坏社会秩序。 举例来说，如果某人在路上看到有人要遭受袭击，为了保护受害人，他可以采取适当的手段制止攻击者，但不能过度使用暴力或者危害攻击者的生命安全。 .	a	a
什么是民法的性质?	民法是私法。民法的调整对象决定了民法是私法（从意思说、利益说、主体说角度论证民法是私法，均可）。将民法归入私法范畴，有助于提倡当事人意思自治，尽可能减少国家干预；有助于培育和发展公民的权利意识和平等观念。民法是调整市场经济关系的基本法。从历史发展看，民法始终与商品经济或市场经济的发展相联系；从内容来看，民法调整的财产关系主要是财产归属关系和财产流通关系。与此相适应,形成了由民事主体、物权、债权等制度组成的民法体系。民法是调整市民社会关系的基本法。民法调整市民社会关系，重在保护市民的私权，协调市民利益，以构建和谐的市民社会秩序。民法是权利法。民法最基本的职能在于对民事权利的确认和保护。从起源来看，民法就是为了对抗公权力的干 预、保障公民权利不受侵犯而产生的。民法体系的构建以权利为基本的逻辑起点，民法总则和民法分则都是围绕权利展开的。民法是实体法。民法规定民事主体相互间权利义务的实体内容。民…	民法是中国的基本民事法律，它的性质主要体现在以下几个方面： 1. **基本法律**：民法是中国的基本民事法律，它规定了民事关系的基本原则和规则，包括合同法、物权法、人格权法、继承法等内容，是民事活动的根本规范。 2. **普遍适用**：民法对全体公民和法人都有约束力，适用于民事活动中的所有主体。 3. **平等原则**：民法在规定民事权利和义务时，坚持平等原则，禁止任何形式的歧视和不平等对待。 4. **保护个人权益**：民法的主要目的之一是保护个人和法人在民事活动中的合法权益，包括生命权、身体权、健康权、名誉权、隐私权等。 5. **规范民事行为**：民法通过明确规定民事行为的形式、效力、变更、终止等方面，规范民事活动的进行，维护社会秩序和经济发展。 6. **动态发展**：随着社会的发展和法律实践的需要，民法也会不断修订和完善，以适应新的社会状况和法律要求。 例如，民法典的实施是中国…	民法是以调整人们日常生活中的民事关系为主要内容的法律规范体系，其性质是一种具有私法属性的法律。民法主要规定了个人和法人之间的权利义务关系，以及公民之间的各种民事行为，如合同、侵权、财产权利等。民法的性质是保护个人私权利益，维护社会秩序和公平正义的法律规范体系。 举例来说，民法中规定了合同的成立、履行和解除等规定，保护了合同当事人的合法权益；同时也规定了侵权行为的民事责任，保护了公民的人身、财产权益。	b	b
什么是缓刑的适用条件。	.犯罪分子被判处拘役或者 3 年以下有期徒刑的刑罚。犯罪分子的犯罪情节较轻，有悔罪表现，没有再犯罪的危险，且宣告缓刑对所居住社区没有重大不良影响。犯罪分子不是累犯或者犯罪集团的首要分子。	缓刑是中国刑法中的一种刑罚执行方式，根据《中华人民共和国刑法》和《中华人民共和国刑事诉讼法》的相关规定，缓刑适用于以下条件： 1. 犯罪行为不严重：缓刑适用于犯罪行为不严重的犯罪，通常是指犯罪行为的危害后果较轻，或者犯罪人具有悔罪态度，能够接受教育改造。 2. 犯罪人表现良好：在服刑期间，犯罪人表现出良好的悔罪态度，积极接受教育改造，并且没有违反监规的情况。 3. 社会公众利益：判决缓刑对社会公众利益有利，能够减少对社会的不良影响。 4. 犯罪人的个人情况：犯罪人的个人情况，如年龄、健康状况、家庭责任等，可能会被考虑在内。 例如，根据《中华人民共和国刑法》第六十条的规定，犯罪人如果有悔罪态度，能够改正错误，并且对社会不构成严重危害，可以判处缓刑。缓刑的期限一般不超过有期徒刑的期限。	根据《刑法》第五十三条规定，对犯罪分子可以适用缓刑的条件包括：首次犯罪；犯罪情节轻微；悔罪表现好；犯罪后积极赔偿被害人损失；未来不再危害社会等。此外，根据《刑法》第五十二条规定，适用缓刑还应当符合以下条件：犯罪分子在判决作出后，没有再犯罪行为；对社会危害性不大；对被害人有赔偿能力；有良好的表现等。只有同时符合这些条件，法院才有可能判决适用缓刑。 举例来说，如果一个未成年人因为盗窃了一部手机，而且是第一次犯罪，之后积极赔偿了被害人，表示悔过并且在判决后没有再犯罪行为，那么根据《刑法》的规定，法院就有可能判决适用缓刑。 。	b	a
什么是中国刑法中国家工作人员的范围。	1.在国家机关中从事公务的人员，包括在各级国家权力机关、行政机关、司法机关和军事机关中从事公务的人员。在乡（镇）以上中国共产党机关、人民政协机关中从事公务的人员，也应当视为国家机关工作人员。受国家机关、国有公司、企业、事业单位委派到非国有公司、企业、事业单位、社会团体从事公务的人员。其他依照法律从事公务的人员。	中国刑法中所称的“国家工作人员”是指在中华人民共和国境内从事国家工作的公民，包括但不限于国家机关工作人员、国有企事业单位工作人员、人民团体工作人员以及其他依法享有国家工作人员待遇的人员。 根据《中华人民共和国刑法》第六十四条的规定，国家工作人员在职务上滥用职权、玩忽职守、徇私舞弊，造成严重后果的，应当依照刑法的规定追究刑事责任。这里的“国家工作人员”包括了政府官员、公检法、公安、军队、国企、事业单位等各个领域的工作人员。 举例来说，如果一名政府官员在处理公共资源分配时，故意偏袒某些个人或企业，导致国家利益遭受重大损失，这样的行为可能会被认定为滥用职权，可能面临刑事责任。	根据中国刑法，中国国家工作人员主要包括国家机关、国有企事业单位的工作人员，以及其他依法设立的组织的工作人员。具体包括但不限于国家机关工作人员、公安机关工作人员、检察机关工作人员、审判机关工作人员、监狱、拘留所、看守所等机构工作人员，国有企事业单位的工作人员等。这些人员在履行职务过程中，如果违法犯罪，将受到相应的法律制裁。 举例来说，如果一名公安机关工作人员利用职权打击报复报案人，即构成滥用职权犯罪，将被依法追究刑事责任。 。	a	a
什么是产品责任的构成要件及其责任形式。	产品责任的构成要件：产品有缺陷。产品缺陷是指产品存在危及人身、他人财产安全的不合理的危险； 产品有保障人体健康和人身财产安全的国家标准、行业标准的，产品缺陷是指不符合该标准。人身、财产受损害。有因果关系。产品责任形式包括：赔偿损失；排除妨碍、消除危险；警示、召回。	产品责任是指生产、销售或供应产品的责任，旨在保护消费者不受因产品缺陷导致的损害。根据中国的《产品质量法》和《民法典》，产品责任的构成要件主要包括以下几个方面： 1. 产品缺陷：产品责任的构成要件之一是产品存在缺陷。产品缺陷是指产品不符合国家标准或者行业标准，或者不符合生产者承诺的性能、质量等要求。例如，如果一辆自行车的刹车系统设计不当，导致车辆在下坡时无法有效制动，导致事故发生，那么这辆自行车就存在缺陷。 2. 产品缺陷导致损害：产品缺陷必须导致消费者或第三方的人身伤害、财产损失或者其他损害。例如，如果上述自行车的刹车系统缺陷导致骑车人受伤，那么这就是产品缺陷导致的损害。 3. 产品责任的主体：产品责任的主体通常是产品的生产者、销售者或者供应者。生产者是指制造产品的企业，销售者是指销售产品的企业，供应者是指提供原材料、零部件或者其他辅助材料的企业。 产品责任的责任形式主要有以下几种： 1…	产品责任的构成要件包括：产品存在缺陷、因此导致消费者受到损害、存在因果关系。产品责任的形式包括召回、赔偿、修理等。 举例：如果某家公司生产的电吹风存在缺陷导致多名消费者被烫伤，那么该公司需要召回所有缺陷产品，并对受伤的消费者进行赔偿或修理。 。	b	b
什么是滥用代理权的主要情形及其效力。	自己代理，是指代理人以被代理人的名义与自己进行民事活动的行为。该行为通常为无效行为，但仅给被代理人带来利益的，或者经被代理人许可的应为有效。双方代理，是指代理人以被代理人的名义与自己代理的其他人进行民事活动的行为。该行为原则上无效，但符合法律规定、交易习惯或者经被代理人追认的应为有效。代理人与第三人恶意串通。此种行为属于无效的民事行为，给被代理人造成损害的，由代理人和第三人负连带 责任。	滥用代理权是指代理人在代理关系成立后，未按照委托人的意愿行事，或者违反了代理关系的法律规定，导致代理行为违法或违背委托人的利益的行为。主要情形包括但不限于： 1. 违反委托人的明确指示：代理人在没有委托人的明确指示下，自行决定代理事务的处理方式，或者以自己的利益为出发点进行代理行为。 2. 违反法律规定：代理人在代理过程中违反了相关法律法规，导致代理行为无效或产生法律后果。 3. 利用代理权进行欺诈或非法活动：代理人利用代理权进行欺诈、贪污、贿赂等非法活动，损害委托人的利益。 4. 违反公平竞争原则：代理人在代理过程中，利用代理权进行不正当竞争，损害其他人的合法权益。 对于滥用代理权的行为，法律通常会认定该行为无效，或者要求代理人承担相应的法律责任。例如，根据《中华人民共和国合同法》的规定，如果代理行为违反了合同的约定或者法律规定，受害方可以要求代理人承担违约责任，并且代理行为可能会被宣…	滥用代理权的主要情形包括但不限于代理人违反授权行使代理权、超越授权行使代理权、以代理人的名义谋取私利等情形。滥用代理权可能导致代理行为的效力受到损害，甚至可能被认定为无效。根据《中华人民共和国合同法》，代理人滥用代理权导致的代理行为无效的，被代理人可以要求对方承担相应的法律责任。 举例来说，如果一个代理人在未经授权的情况下签署了代理合同，导致被代理人遭受了经济损失，那么这个代理行为就属于滥用代理权的情形。在这种情况下，被代理人可以要求合同无效，并要求代理人承担相应的经济赔偿责任。 。	tie	a
什么是防卫过当的成立条件及其刑事责任。	防卫过当是指防卫行为明显超过必要限度造成重大损害的行为。防卫过当是在正当防卫过程中发生的，它必须满足正当防卫的前提条件，防卫过当和正当防卫的区别在于防卫行为超过了必要限度造成了重大损害。必要限度是指足以制止正在进行的不法侵害所必需的限度。防卫行为明显超过必要限度是指防卫行为的性质、手段、强度及造成的损害明显超过不法侵害的性质、手段、强度及造成的损害。重大损害，是指致人重伤或者死亡的结果。防卫过当的刑事责任包括两个方面：一是防卫过当的定罪。防卫过当本身不是罪名，应根据行为人造成损害的结果和其主观罪过确定。二是防卫过当的量刑。防卫过当应当负刑事责任，但应当减轻或者免除刑罚。具体适用时，应综合考虑过当程度、权益性质、防卫动机、罪过形式等。	防卫过当是指在防卫行为中，使用的方式、手段或者力度超过了合理的防卫范围，造成了超出防卫目的的后果。根据《中华人民共和国刑法》第20条规定，防卫过当的成立条件包括： 1. 当事人在受到他人侵害时，采取防卫措施。 2. 防卫措施的使用超过了合理防卫的范围，造成了他人的死亡或者体刑。 防卫过当的刑事责任根据《中华人民共和国刑法》第20条的规定，防卫过当的行为如果造成他人死亡的，应当依照刑法关于故意杀人罪的规定追究刑事责任；如果造成他人重伤或者其他严重后果的，应当依照刑法关于故意伤害罪的规定追究刑事责任。 举例来说，如果某人在遭受他人非法侵害时，为了保护自己使用了过度的武力，导致对方死亡，那么他可能会被追究故意杀人罪的刑事责任。	防卫过当是指在紧急情况下，为了抵御正在进行的不法侵害而实施的过度防卫行为。根据《中华人民共和国刑法》规定，防卫过当的成立条件包括：一是紧急情况，即被侵害人正遭受不法侵害，必须立即作出反击；二是过度防卫，即防卫行为明显超出了必要限度，造成了不应有的严重后果。 对于防卫过当的刑事责任，根据我国刑法的规定，如果防卫过当行为造成致人重伤或者死亡的，应当承担刑事责任。但如果被侵害人的防卫行为明显超出了必要限度，造成了严重后果，但是情节轻微，也可以不追究刑事责任。 举例来说，如果某人在被盗窃时为了自卫将盗贼打伤甚至致死，但打击力度明显超过了必要限度，那么这个人就可能构成防卫过当，需要承担相应的刑事责任。 。	b	b
什么是物权的保护。	物权的保护，是指通过法律规定的方法和程序保障物权人在法律许可的范围内对其财产行使占有、使用、收益和处分权利的制度。物权保护方式主要包括请求确认物权、物权请求权、请求赔偿损失三个方面。请求确认物权。在财产的归属、内容发生争议而处于不确定状态时，利害关系人可以向法院提起诉讼，请求确认物权。确认物权是保护物权的最初步骤。物权请求权（物上请求权）。物权请求权是指物权人在其物权受到侵害或有被侵害的危险时，基于物权而请求侵害人为一定行为或不为一定行为，使物权恢复到原有状态或侵害危险产生之前的状态的权利。依妨害形态的不同， 物权请求权可分为三种：原物返还请求权，此种请求权适用于他人无权占有物权人的标的物而致物权被妨害的情形；②妨害排除请求权，此种请求权适用于他人以占有标的物之外的方法妨害物权圆满状态的情形；③妨害防止请求权（消除危险请求权），此种请求权适用于物权在将来有受到妨害危险的情形。请求赔偿损失…	物权的保护是指对物权主体的权利进行法律保障和维护，确保其在物权关系中能够得到合法权益的实现和保护。物权是指个人或组织对其所有的、占有或使用的物品所享有的权利，包括所有权、使用权、收益权、管理权和处分权等。 在中国，物权的保护主要体现在以下几个方面： 1. **法律规定**：《中华人民共和国物权法》是中国物权保护的基础法律，它明确了物权的种类、物权的取得、物权的行使、物权的限制和物权的终止等内容，为物权主体提供了法律上的保障。 2. **司法保护**：当物权主体的权益受到侵害时，可以通过法律途径向法院提起诉讼，要求法院保护其合法权益。例如，如果某人未经所有权人同意擅自占用其土地，可以由所有权人向法院提起诉讼，要求其停止侵害并赔偿损失。 3. **行政保护**：行政机关也有一定的职责在保护物权方面。例如，地方政府在土地使用方面的管理，应当确保土地所有权人的合法权益不受侵害。 4. **自我保…	物权的保护是指法律保障个人或者组织对于特定物品的占有、使用、收益和处分的权利。在中国，物权的保护主要体现在《物权法》中，该法规定了人们对于自己的财产享有的权利，包括所有权、用益物权和担保物权等。物权的保护包括保护财产完整、保护物品的合法占有和使用、保护对物品的收益和处分权等方面。 举例来说，如果某个人拥有一块土地的所有权，但有人未经允许侵犯了他的土地使用权，那么他可以依据物权法申请法律保护，维护自己的权益。 .	b	b
什么是刑法的概念和特征。	刑法是规定犯罪及其法律后果的法律规范的总和。因为犯罪的主要法律后果是刑罚，所以刑法又称犯罪法我刑罚法。在中国，刑法是由全国人民代表大会及其常务委员会代表人民的意志制定的、规定犯罪及其法律后果的法律。刑法的特征是指刑法同其他法律如民法、行政法相比的特点，所以也称为刑法的法律性质。刑法具有下列特征：调整范围的广泛性。刑法在保护的利益与调整的对象上，比较广泛。从《刑法》第 2条规定的任务和第 13 条规定的犯罪的定义中就可以看出，刑法保护一切对我们社会生活至关重要的利益，从国家安全、公共安全、经济秩序到公民个人的人身权利、财产权利，而其他法律如民法、行政法可能仅涉及社会生活的某一方面或某一层面的利益与关系。严重违反其他法律的行为，就有可能进入刑法的调整范围，刑法为其他法律提供了强有力的支持和保障。调整对象的专门性。刑法的任务以及实现任务的方法不同于其他法律部门，刑法主要规定犯罪，以及运用刑罚的…	刑法是指国家为了维护社会秩序、保护公民的生命、健康、财产和其他合法权益，制定的一系列法律规范，规定了违法行为的种类、责任和处罚。刑法的概念和特征主要包括以下几个方面： 1. 主体：刑法是国家法律的一部分，由国家的立法机关制定，具有普遍的法律效力。 2. 目的：刑法的主要目的是为了保护社会秩序和公民的合法权益，通过惩罚犯罪行为来防止犯罪的发生。 3. 内容：刑法内容包括犯罪的定义、构成要件、刑罚的种类和量刑标准等。 4. 特征：刑法具有普遍性、规范性、严肃性和公正性。它对所有的公民都有约束力，规定了违法行为的标准和惩罚措施，同时也确保了法律的实施过程中公正无私。 例如，根据《中华人民共和国刑法》第六条规定，犯罪是指违反刑法的行为，应当受到刑事处罚的行为。刑法对犯罪行为进行了详细的规定，并对犯罪的构成要件、刑罚种类和量刑标准等方面进行了明确的界定。	刑法是规范国家对犯罪行为进行制裁的一门法律学科，主要是通过制定刑事法律规则来规范和约束人们的行为，保护社会公共利益，维护社会秩序。刑法的特征包括：一是刑法是一种强制性法律，即对犯罪行为的制裁是通过国家强制执行的；二是刑法是一种惩罚性法律，即对犯罪者进行惩罚以达到维护社会秩序的目的；三是刑法是一种独立的法律，即独立于其他法律学科，专门规定犯罪和刑事责任的法律规则。 举例：根据我国刑法，盗窃、故意伤害、贪污受贿等行为均构成犯罪，对于这些犯罪行为，我国刑法有明确的法律规定并规定了相应的刑罚。 。	a	a
什么是渎职罪的共同特征。	渎职罪是指国家机关工作人员在公务活动中滥用职权、玩忽职守、徇私舞弊，妨碍国家管理活动， 致使公共财产或者国家与人民的利益遭受重大损失的行为。渎职罪具有以下一些共同特征：侵犯的客体是国家机关的正常活动；客观方面表现为行为人实施滥用职权、玩忽职守等行为；致使公共财产、国家和人民利益遭受重大损失的行为；犯罪主体是国家机关工作人员；主观方面有故意和过失两种心理态度。	渎职罪是指公务员、工作人员在职务上发生违法行为，导致国家利益、社会公共利益受到损害的犯罪。渎职罪的共同特征主要包括： 1. 职务行为：渎职罪的行为必须与公务员或工作人员的职务相关。这种行为通常是指在执行公务时的行为。 2. 违法行为：渎职罪的行为必须违反法律规定，构成犯罪。这种行为可能包括不履行职责、不当履行职责或者过度履行职责等。 3. 损害国家利益或社会公共利益：渎职罪的行为必须导致国家利益或社会公共利益受到损害。这可能包括损害国家安全、公共财产、公共服务等。 4. 有过错：渎职罪的行为必须有过错，即行为人必须有故意或重大过失。简单的疏忽或不当行为可能不构成渎职罪。 5. 受法律追究：渎职罪的行为必须受到法律的追究，行为人可能会受到刑事责任的追究。 例如，一个公务员在管理公共资金时，故意将资金用于个人利益，这种行为违反了法律规定，导致国家利益受到损害，构成渎职罪。	渎职罪的共同特征包括：公职人员在履行职务过程中违法、失职，导致国家、集体或他人利益受到损害的行为。这种行为通常表现为违背职责、滥用职权、玩忽职守等情况。例如，利用职权谋取私利、不认真履行职责导致事故发生等行为都可能构成渎职罪。	a	a
什么是商业秘密的构成要件。	秘密性：不为公众所知悉。价值型：能为权利人带来经济利益。实用性：具有实用性。保密性：经权利人采取保密措施。	商业秘密是指以财产形式存在的，具有经济价值的，通过技术、管理等方面的投入，难以复制、难以获得的信息。其构成要件主要包括以下几个方面： 1. **经济价值**：商业秘密必须具有实质的经济价值，这个价值可以是直接的，也可以是潜在的。例如，一个公司开发的新药物公式、生产工艺等都可能具有显著的经济价值。 2. **难以复制**：商业秘密的内容难以通过正常的努力和方法被复制或推断出来。这意味着竞争对手需要不合理的努力才能获得相同的信息。例如，一个公司的特殊烘焙技术可能需要长时间的实验和尝试才能复制。 3. **难以获得**：商业秘密的内容不仅难以复制，还难以通过其他方式获得。这意味着即使竞争对手知道了信息的存在，也难以通过合法的方式获取。例如，一个公司的客户名单可能是通过长期的市场营销活动积累而来的，竞争对手很难通过合法手段获取。 4. **通过合法途径获得的限制**：商业秘密的保护不仅仅是对未经…	商业秘密的构成要件包括以下几点： 1. 信息的保密性：商业秘密必须是具有保密性的信息，即不为公众所知晓或容易获取的信息。 2. 经济价值：商业秘密必须具有经济价值，即可以为持有者带来经济利益或竞争优势。 3. 受到保护措施：持有商业秘密的主体必须采取合理的保密措施，如签订保密协议、限制员工的知识范围等，以确保信息的保密性。 4. 合法取得：商业秘密的获取、使用和披露必须是合法的，不能通过非法手段获取或者违反合同约定。 举例来说，公司的客户名单、生产工艺、销售策略等都可以构成商业秘密，只要符合以上要件，就可以受到法律的保护。 。	b	a
什么是附条件民事法律行为的含义及所附条件的特点。	含义附条件的民事法律行为是指双方当事人在民事法律行为中设立了一定的事由作为条件，以条件的成就与否作为决定民事法律行为效力产生或解除根据的民事法律行为。条件及其特征附条件的法律行为是为行为人的某种特殊需要而设立的法律行为。民事法律行为中所附的条件民事一种特定的法律事实，它可以是某种自然现象，也可以是人的某种行为，还可以是某种特定的事件，但并非任何自然想象或任何行为，都可以作为条件，作为所附的条件必须有下列特点：条件应当是将来发生的事实，具有未来性，已经发生的事实，不得作为民事法律行为发附的条件。条件应当是将来可能发生也可能不发生的事实，具有或然性，如果是肯定能发生或肯定不能发生的事实，就不能作为民事法律行为所附的条件。如果所附条件是不可能发生的，应当认定该民事行为无效。条件应当是当事人选定的事实，具有非法定性，法律规定的或基于行为性质所决定的事实，不能作为民事法律行为所附的条件。条件应当是…	附条件民事法律行为是指当事人在进行民事法律行为时，为了实现其民事权利或义务，需要满足一定的条件或前提。这些条件可能是事实上的、法律上的或者双方约定的，直到这些条件得到满足，民事法律行为才算完成。 所附条件的特点主要有以下几点： 1. 条件的存在性：附条件民事法律行为的成立，需要依赖于一定的条件，这些条件可能是双方约定的，也可能是法律规定的。 2. 条件的可撤销性：在条件未满足之前，民事法律行为尚未产生法律效力，双方都有权撤销或终止该行为。 3. 条件的实现性：当条件实现时，民事法律行为才算成立，产生法律效力。例如，买卖合同的成立通常需要双方签订合同并支付定金或全款。 4. 条件的具体性：附条件的民事法律行为往往需要明确规定条件的内容和条件实现的方式，以避免法律效力的模糊性。 举例来说，甲乙双方签订了一份房屋买卖合同，合同规定甲方需在签订合同当天支付50%的定金，余下的款项在交房当天支付。…	附条件民事法律行为是指当事人在订立合同或者其他民事法律行为时，约定必须在某种特定条件发生或者不发生时，该合同或者行为产生法律效力。附条件的特点包括： 1. 不确定性：附条件民事法律行为的有效性取决于特定条件的实现，因此在特定条件未实现之前，该行为并不产生法律效力。 2. 可撤销性：在条件尚未实现之前，当事人可以随时撤销或者变更附条件民事法律行为。 3. 法律效力的暂缓：附条件民事法律行为在条件实现时才产生法律效力，条件未实现时并不具有法律效力。 举例来说，甲和乙在合同中约定，只有在乙支付了货款后，甲才会交付商品给乙。这就是一个附条件民事法律行为，商品的交付取决于乙支付货款这一特定条件的实现。 。	b	b
什么是中国刑法中的教唆犯。	概念：教唆犯，之教唆他人实行犯罪的人。具体而言，就是故意引起他人实行犯罪决意的人。特点：教唆犯的基本特点是，教唆他人实行犯罪而自己并不参加犯罪的事实，是使他人产生犯罪意图的人。成立条件：1主观上具有使他人产生犯罪意图和决心的故意，即所谓唆使他人犯罪的故意。这种故意的内容应是明确的，即他知道自己在教唆什么人犯罪和犯什么罪。没有明确的故意内容，不能成立教唆犯；无意引起他人产生犯罪意图的，更不能成立教唆犯。2在客观上实施了教唆他人犯罪的行为。通常表现为怂恿、诱骗、劝说、请求、收买、强迫等方式，教唆特定的人实施特定的犯罪。至于教唆行为是否以及实际引起被教唆人的犯罪意图和决心，被教唆人是否实行了被教唆的犯罪，不影响教唆犯的成立。刑事责任：1对教唆犯按照其在共同犯罪中所起的作用处罚，起主要作用的，按主犯处罚；仅起到次要作用的，按从犯处罚。实际上，教唆犯一般起主要作用，一般按主犯处罚，但不能排除其所起…	教唆犯是指在中国刑法中，对他人直接或间接指使、唆使他人实施犯罪行为的人。根据《中华人民共和国刑法》的相关规定，教唆犯不仅要承担与直接犯罪行为相应的刑事责任，还可能因为其在犯罪过程中的作用和影响力而受到更严厉的处罚。 例如，假设某人通过网络平台对他人进行了诱导和指使，导致他人实施了诈骗罪。这个在后面指使的行为者，即使没有直接参与诈骗行为，也可能被认定为教唆犯，并依法承担相应的刑事责任。 在法律实践中，教唆犯的认定通常需要依据具体案件的实际情况，包括指使的性质、指使的内容、指使的结果以及指使者的身份等因素综合判断。因此，教唆犯的认定往往需要法律专业人士根据具体案件材料进行详细分析。	根据中国刑法，教唆犯是指以言语、文字、信函、电话、网络等方式，故意教唆他人实施犯罪行为的人。教唆犯的行为必须具备明确的主观故意和客观行为，导致他人实施犯罪行为。教唆犯在刑法中被视为共同犯罪的一种形式，与实际犯罪行为的人承担相应的法律责任。 举例来说，如果某人通过社交媒体教唆他人去盗窃一家商店，导致他人实施了盗窃行为，那么这个人就构成了教唆犯。根据中国刑法，教唆犯将受到相应的刑事处罚。 。	a	a
什么是中国物权法的公示、公信原则	物权公示、公信原则的内涵所谓公示，是指以一定的方式使公众知悉物权变动的事实。物权存在公示，为物权的静态公示。所谓公信，又叫公信力，是指物权变动符合法定公示方式的就具有可信赖的法律效力。以工信原则，物权的存在与变动公示的，即发生权利存在和权利变动的效力，即使公示有瑕疵，善意受让人也不负返还义务。公示与公信的关系公信力是对公众给予公示权属信赖的保护，按照“变动公示主义”的通说，公示的对象为物权的变动，那么公信的对象也必然是物权的变动。而我们知道物权的变动过程是不可能或极不方便为公众所了解的，于是即便在“变动公示主义”者眼中，公示所信赖的仍然是“登记薄中记载的内容”或从动产的“占有”状态推断的权利所有。公信力保护信赖公示的善意第三人，实质上是容忍物权公示的瑕疵，对真正权利人的利益是一种牺牲。	中国物权法的公示、公信原则是指在物权登记制度中，确保物权登记信息的真实性、准确性和完整性，并对外进行公开的原则。这种原则的目的是为了提高物权登记的透明度，保护当事人的合法权益，避免物权登记信息的不当使用，维护社会公平正义。 具体来说，公示原则要求物权登记机构应当将登记信息公开，任何人都可以通过物权登记机构查询到相关的物权信息。公信原则则要求物权登记信息的真实性、准确性和完整性，确保登记信息的可靠性。 例如，根据《中华人民共和国物权法》第六十四条规定，物权登记机构应当将登记信息公开，任何人都可以查询。同时，物权登记机构应当对登记信息的真实性、准确性和完整性负责，确保登记信息的公信力。	根据中国的物权法，公示、公信原则是指不动产权利应当依法进行公示登记，登记内容应当真实、准确、完整，登记机构应当保持登记材料的真实、完整，确保不动产权利的真实性和确定性。这一原则的目的是保护不动产权利人的权益，促进不动产交易的安全和有序进行。 举例来说，根据中国的不动产登记制度，购房者在购买房产时需要进行房产登记，确保房产的所有权归属清晰明确，避免出现权属纠纷。这就体现了公示、公信原则的重要性。 。	a	a
什么是牵连犯的概念及要件。	牵连犯是指以实施某一犯罪为目的，而其方法行为或结果行为又触犯其他罪名的犯罪形态。其要件包括以下几个方面：必须基于一个最终的犯罪目的。具有两个以上的行为。数个行为之间必须具有牵连关系。数个行为必须触犯不同罪名。	牵连犯是指因与犯罪嫌疑人、被告人有血缘、婚姻关系或者其他亲属关系而被追究刑事责任的人。牵连犯的概念和要件主要体现在以下几个方面： 1. 关系要件：牵连犯的关系主要包括血缘关系和婚姻关系。例如，父母、子女、兄弟姐妹、配偶等之间的亲属关系。如果这些亲属成员在犯罪过程中起到了帮助、支持或者隐匿犯罪事实的作用，他们可能会被追究刑事责任。 2. 行为要件：牵连犯的行为要件通常是指在犯罪中起到了帮助、支持或者隐匿犯罪事实的行为。例如，如果一个犯罪嫌疑人的配偶在警方询问时故意隐瞒其犯罪事实，或者在犯罪过程中提供了帮助，这样的行为可能会构成牵连犯的犯罪。 3. 法律责任：牵连犯的法律责任通常与其亲属犯罪嫌疑人或被告人的犯罪责任相一致。如果亲属犯罪的性质较轻，牵连犯的法律责任也可能相应较轻；如果亲属犯罪的性质较重，牵连犯的法律责任也可能相应较重。 例如，根据《中华人民共和国刑法》第六十条规定：“犯罪的，应…	牵连犯是指在共同犯罪中未直接参与犯罪行为，但在犯罪行为中起到一定作用，与其他犯罪人一起构成犯罪的人。要成为牵连犯，需要同时具备以下要件： 1. 具有共同犯罪的故意：牵连犯必须知道并同意参与共同犯罪的实施，或者明知他人将犯罪行为而未尽力阻止。 2. 与其他犯罪人有一定的关联：牵连犯在犯罪行为中起到一定的作用，可能是提供帮助、支持、配合等。 3. 犯罪行为必须实现：虽然牵连犯未直接实施犯罪行为，但其行为必须有助于犯罪行为的实现。 举例来说，如果A、B、C三人共同策划抢劫一家银行，其中A持枪抢劫，B开车帮助逃跑，而C在远处看守警察动向，如果C明知A、B两人将抢劫，但未报警或未尽力阻止，那么C就可能构成牵连犯。 。	b	b
什么是危害公共安全罪的概念及共同特征。	危害公共安全罪，是指行为人故意或过失实施危及不特定多数人的生命、健康和重大公私财产安全的行为。这一类犯罪具有以下共同特征：侵犯的客体是社会的公共安全，即不特定的多数人的生命、健康和重大公私财产。客观方面表现为实施了危害公共安全的行为。犯罪主体多数是一般主体。少数犯罪主体是特殊主体。主观方面既可以表现为故意，也可以表现为过失。	危害公共安全罪是指违反公共安全管理法律、行政法规，造成严重后果的行为。根据《中华人民共和国刑法》第九十四条的规定，危害公共安全罪包括以下几个共同特征： 1. 违反公共安全管理法律、行政法规：这意味着犯罪行为必须与公共安全管理相关的法律法规相违背。例如，违反交通安全法规、环境保护法规、消防安全法规等。 2. 造成严重后果：危害公共安全罪的成立需要有实际的后果，这些后果通常是对公共安全造成的损害。后果的严重程度可以是人员伤亡、财产损失、环境污染等。 3. 犯罪行为的主体：危害公共安全罪的主体可以是个人，也可以是组织。无论是个人还是组织，必须有相应的行为能力，能够独立实施犯罪行为。 举例来说，如果某人违反交通安全法规，驾驶高档车辆在酒后驾驶，导致交通事故造成多人死亡，这种行为构成危害公共安全罪。因为它违反了公共安全管理的法律法规，并且造成了严重的人员伤亡后果。	危害公共安全罪是指危害社会公共安全的行为，主要包括破坏交通工具、交通设施、公共设施等公共设施，以及制造、运输、储存危险物质，有意破坏社会秩序，危害社会公共安全的行为。 其共同特征包括： 1. 行为人的主观故意：行为人必须是有意为之，明知自己的行为会危害公共安全，危害社会秩序。 2. 危害对象是公共安全：行为必须直接危害公共安全，如破坏公共设施、制造危险物质等。 3. 危害程度较高：危害公共安全罪是一种严重的犯罪行为，其后果往往是不可逆的，给社会造成极大的危害。 举例来说，如果有人恶意在火车轨道上放置障碍物，导致列车脱轨，造成人员伤亡，这就构成了危害公共安全罪。 。	a	a
什么是危害公共安全罪的概念及共同特征。	危害公共安全罪，是指行为人故意或过失实施危及不特定多数人的生命、健康和重大公私财产安全的行为。这一类犯罪具有以下共同特征：侵犯的客体是社会的公共安全，即不特定的多数人的生命、健康和重大公私财产。客观方面表现为实施了危害公共安全的行为。犯罪主体多数是一般主体。少数犯罪主体是特殊主体。主观方面既可以表现为故意，也可以表现为过失。	危害公共安全罪是指违反公共安全管理法律、行政法规，造成严重后果的行为。根据《中华人民共和国刑法》第九十四条的规定，危害公共安全罪包括以下几个共同特征： 1. 违反公共安全管理法律、行政法规：这意味着犯罪行为必须与公共安全管理相关的法律法规相违背。例如，违反交通安全法规、环境保护法规、消防安全法规等。 2. 造成严重后果：危害公共安全罪的成立需要有实际的后果，这些后果通常是对公共安全造成的损害。后果的严重程度可以是人员伤亡、财产损失、环境污染等。 3. 犯罪行为的主体：危害公共安全罪的主体可以是个人，也可以是组织。无论是个人还是组织，必须有相应的行为能力，能够独立实施犯罪行为。 举例来说，如果某人违反交通安全法规，驾驶高档车辆在酒后驾驶，导致交通事故造成多人死亡，这种行为构成危害公共安全罪。因为它违反了公共安全管理的法律法规，并且造成了严重的人员伤亡后果。	危害公共安全罪是指故意以危害公共安全的方式，危害公共安全，造成或者可能造成重大危害的行为。其共同特征包括行为人必须是以故意为目的，而且行为必须具有危害公共安全的特征，例如炸弹爆炸、暴力袭击等。此类行为严重威胁社会公共秩序和安全，危害人民群众生命财产安全，属于严重的违法行为。 举例来说，如果某人在公共场所放置爆炸物品，有明显的危害公共安全的目的，那么这个行为就构成了危害公共安全罪。 。	b	b
什么是商标权的内容。	商标权，是指商标注册人对其注册商标享有专有使用权，主要包括独占使用权、使用许可权和转让权等内容。独占使用权是指商标权人实际享有的独占性使用的权利。商标一经注册，商标权人即对注册商标在法定范围内享有专有使用的权利，他人未经许可不得使用。转让权是指商标权人有权依照法律规定，将商标权转让给他人。商标转让后，原商标权人的权利丧失，受让人取得商标权。使用许可权是指商标权人有权通过签订商标使用许可合同，许可他人使用自己的注册商标。	商标权是指商标的注册人对其注册商标享有的权利，包括但不限于以下几个方面： 1. **禁止他人使用相同或近似商标**：商标权的持有者有权禁止他人在未经其许可的情况下使用相同或近似于其注册商标的标识，以避免消费者混淆和误导。 2. **禁止他人制造、进口、销售标有相同或近似商标的商品**：商标权的持有者还可以禁止他人制造、进口或销售标有其注册商标的商品，以保护其商标的独特性和商品的市场地位。 3. **禁止他人使用相同或近似商标进行商品的包装、广告**：商标权的持有者有权禁止他人在商品的包装、广告中使用其注册商标或近似商标，以防止消费者被误导。 4. **要求赔偿**：如果他人侵犯了商标权，商标权的持有者有权要求侵权人赔偿损失，包括但不限于赔偿金、诉讼费、律师费等。 5. **其他权利**：商标权的持有者还可以要求他人停止侵权行为，销毁侵权商品，或者采取其他必要的措施以消除侵权的影响。 例如…	商标权是指商标所有人依法享有的专有权利，包括对商标的使用、转让、许可使用等权利。商标权的内容主要包括以下几个方面： 1. 商标的专有权利：商标所有人有权在其注册商标的指定商品或服务上独占使用该商标，其他人不得擅自使用与其商标相同或近似的标识。 2. 商标的转让权：商标所有人可以依法将商标的所有权转让给他人，转让后新所有人享有商标权。 3. 商标的许可使用权：商标所有人可以与他人签订商标许可使用协议，允许他人在一定范围内使用其商标，并收取相应的许可费用。 4. 商标的保护权利：商标所有人有权依法维护其商标的合法权益，包括追究侵权行为、维护商标的声誉和价值等。 举例：例如，苹果公司是iPhone手机的商标所有人，苹果公司有权对iPhone商标进行独占使用，防止他人未经授权使用类似的商标来误导消费者。苹果公司还可以将iPhone商标转让给其他公司，或者与其他公司签订许可协议允许其在一定范围内使…	b	b
什么是侵权责任的抗辩事由。	侵权责任的抗辩理由包括正当理由和外来原因。正当理由着眼于加害行为本身具有合法性或合理性进行抗辩，即承认某行为是损害发生的原因，但主张行为的实施由合法的根据。主要包括依法执行公务、正当防卫、紧急避险、受害人同意和自助行为外来原因是指行为人将损害发生的全部或部分原因归结于外部事件或他人的行为，从而主张其行为不构成或不单独构成法律上应负责的原因。主要包括不可抗力、意外事件、受害人过错和第三人过错。	侵权责任的抗辩事由是指当事人在侵权责任主体认定和责任承担方面提出的理由和证据，这些理由和证据可能会影响侵权责任的认定或责任的范围。根据《中华人民共和国民法典》第六百九十四条规定，侵权责任的抗辩事由包括但不限于以下几种情况： 1. 自然灾害：当侵权行为是由自然灾害引起的，且该自然灾害是不可预见的，且当事人没有过错时，侵权责任可能不成立。 2. 法律允许的行为：当侵权行为是法律允许的，或者是出于合法目的进行的，且不超过法律允许的范围时，侵权责任可能不成立。 3. 自卫或他人正当防卫：当侵权行为是出于自卫或他人正当防卫的情况下，侵权责任可能不成立。 4. 限制责任：当侵权行为人在行为时存在过错，但过错程度不足以构成侵权责任时，可能会适用限制责任原则。 5. 侵权行为人的年龄：根据《中华人民共和国民法典》第六百九十五条规定，未满十四周岁的未成年人在行为上存在过错时，应当适用保护责任原则。 举例来…	侵权责任的抗辩事由是指被告在侵权行为被认定后，可以以某种理由来减轻或免除其侵权责任的情形。根据《侵权责任法》及相关司法解释，侵权责任的抗辩事由包括但不限于：不可抗力、被害人过错、第三人行为等。 举例来说，如果一名司机在驾驶途中因为突发的地震导致车辆失控撞上了路边的商店，造成商店损坏，那么司机可以以不可抗力为抗辩事由来减轻或免除其侵权责任。 。	a	b
什么是中国刑法中的法律认识错误。	法律上的认识错误是指行为人对自己行为的法律性质发生误解。主要表现为假象犯罪、假想犯罪和 行为人对自己犯罪行为的罪名和罪行轻重发生误解。假象犯罪是指行为在法律上规定为犯罪，而行为人误认为不是犯罪。此种情形原则上是不排除罪责。假想犯罪是指行为人的行为在法律上并没有规定为犯罪，而行为人误认为是犯罪。行为人假想犯罪并不改变行为的法律性质，此种情形下不成立犯罪。行为人对自己犯罪行为的罪名和罪行轻重发生误解。这种对法律的误解不涉及行为人有无违法性（或者危害性意识）。此种情形下不影响罪过的有无以及大小、不影响定罪量刑。	法律认识错误是指在刑事诉讼过程中，犯罪嫌疑人、被告人对自己的行为性质、法律后果或者其他与案件有关的法律事实持有错误的认识。这种错误的认识可能导致犯罪嫌疑人或被告人对自己的行为缺乏刑事责任意识，或者对自己的权利和义务认识不清，从而影响到案件的侦查、审查和判决。 例如，在中国刑法中，对于故意伤害罪，犯罪嫌疑人可能因为法律认识错误，认为对方的伤害是轻微的，不构成犯罪。然而，根据《中华人民共和国刑法》的规定，故意伤害他人造成轻伤的，处三年以下有期徒刑、拘役或者管制，并处或者单处罚金。因此，如果犯罪嫌疑人因为法律认识错误而未能认识到自己的行为构成犯罪，那么这一错误的认识可能会影响到案件的审判结果。 在刑事诉讼过程中，法院、检察院和公安机关都有责任帮助犯罪嫌疑人和被告人纠正法律认识错误，确保他们能够充分行使自己的法律权利。	在中国刑法中，法律认识错误是指犯罪嫌疑人或被告在犯罪行为中对法律规定的认识出现错误，导致其认为自己的行为不构成犯罪或者对犯罪行为的性质、后果等产生错误的认识。如果法院判定被告存在法律认识错误，可能会在量刑上予以考虑，但并不一定会免除法律责任。 例如，如果某人因为未了解到盗窃行为构成犯罪，而在未经他人同意的情况下擅自拿走他人的财物，虽然他认为这只是一种玩笑行为，但实际上已触犯了刑法的相关规定，因此仍然需要承担相应的法律责任。 。	a	a
什么是中国刑法理论中判断犯罪既遂的不同学说	中国刑法理论中判断犯罪既遂一般有以下三种观点：结果说。认为犯罪既遂是指故意犯罪的实行行为造成了刑法规定的犯罪结果。区分既遂与未 遂应以犯罪结果是否发生为标准。据此，故意犯罪的实行行为没有造成刑法规定犯罪结果，属于犯罪未遂。目的说。认为犯罪既遂是指故意犯罪的实行行为达到了行为人的犯罪目的。据此，故意犯罪 的实行行为没有达到行为人犯罪目的的，属于犯罪未遂。构成要件（齐备）说，认为犯罪既遂是指犯罪行为完全具备了基本犯罪构成要件的情况。据 此，犯罪行为没有完全具备基本犯罪构成要件的，属于犯罪未遂。中国刑法理论中对判断犯罪既遂以构成要件（齐备）说为通说，主要根据刑法分则条文的具体规定 进行既遂标准的认定，不以犯罪目的达到或者犯罪结果发生作为犯罪既遂之标准。	在中国刑法理论中，判断犯罪既遂是一个重要的概念，它指的是犯罪行为是否已经达到法律所定义的犯罪结果，进而构成犯罪。关于犯罪既遂的判断，主要有两种学说：行为主义学说和结果主义学说。 行为主义学说认为，犯罪既遂的判断主要基于行为本身，即使行为未能达到预期的结果，也可以构成犯罪。这种学说强调行为的主观故意和客观行为的完成性。例如，如果一个人明知其行为可能导致严重的后果，但出于意外原因未能达到，依然可以构成犯罪。 结果主义学说则侧重于犯罪行为的实际结果，即犯罪既遵的判断应基于行为产生的后果。这种学说认为，只有当行为确实产生了法律所规定的结果时，才可以认定犯罪既遂。例如，如果一个人企图杀人，但结果只造成了轻伤，根据结果主义的观点，这不构成杀人罪。 中国刑法理论中，两种学说并存，但在具体案件的审判中，通常会结合案件的具体情况来判断。例如，根据《中华人民共和国刑法》的相关规定，犯罪既遂的判断需要结合行为…	中国刑法理论中判断犯罪既遂的不同学说包括行为学说、结果学说和合一学说。行为学说强调的是犯罪行为的实施过程，只要犯罪行为已经完成，即认定为犯罪既遂；结果学说则认为只有犯罪行为的结果已经产生，才能认定为犯罪既遂；而合一学说则综合考虑行为和结果，认为只要犯罪行为和结果均已完成，即认定为犯罪既遂。 例如，在盗窃案中，行为学说认为只要盗窃行为已经完成，即可认定为犯罪既遂；结果学说则认为只有盗窃物品已经被盗窃者拿走，才能认定为犯罪既遂；合一学说则综合考虑盗窃行为和结果，只要盗窃行为完成并且物品被盗走，即认定为犯罪既遂。 .	a	b
什么是可撤销的民事法律行为	可撤销的民事法律行为是指虽然已经成立，但因意思表示有瑕疵，当事人有权请求人民法院或仲裁机构予以撤销的民事法律行为。此种民事法律行为不是当然无效，而是必须由当事人向法院或者仲裁机关请求裁定。可撤销的民事法律行为具有如下特征：可撤销的民事法律行为主要是因意思表示不真实而发生的民事法律行为。可撤销的民事法律行为须由撤销权人主动。行使撤销权。撤销权在性质上属于形成权，撤销权人通过单方的意思表示行使撤销权，可导致可撤销民事法律行为的效力溯及既往的消灭。可撤销的民事法律行为在被撤销前仍然是有效的。可撤销的民事法律行为的情形：重大误解的民事法律行为，指行为人对于民事行为产生错误的理解，并基于这种错误理解而为 的民事法律行为。因受欺诈而实施的民事法律行为。一方或者第三人以胁迫手段，使对方在违背真实意思的情况下实施的民事法律行为。显失公平的民事法律行为。这是指在双方、有偿的民事法律行为中，一方利用对方处于…	可撤销的民事法律行为是指当事人在一定条件下，可以撤销其已经生效的民事法律行为，恢复到行为发生前的状态。这种行为通常是基于当事人的自由意志，且没有第三方的利益依赖。 根据《中华人民共和国民法典》第六百零二条规定，民事法律行为可以撤销的，包括但不限于以下几种情况： 1. 当事人在未达成完全意思同意的情况下所作的民事法律行为。 2. 当事人因欺诈、胁迫、误解而作出的民事法律行为。 3. 当事人因过失而作出的民事法律行为，损害他人利益的，应当承担赔偿责任。 4. 当事人因违反法律规定而作出的民事法律行为。 举例来说，如果甲在未完全理解合同内容的情况下签订了一份合同，那么甲有权要求撤销该合同，恢复双方原有的状态。 需要注意的是，不是所有的民事法律行为都可以撤销。例如，某些合同一旦履行完毕，或者第三方已经依赖该行为并取得利益，通常不允许撤销。此外，撤销行为可能需要支付一定的赔偿金，以补偿因撤销行为而…	可撤销的民事法律行为是指当事人可以在一定条件下自愿撤销或变更的法律行为。例如，基于双方当事人之间的协商一致，可以撤销的合同就是一种可撤销的民事法律行为。此外，在一些特定情况下，法律也规定了某些民事法律行为是可撤销的，比如未成年人的法律行为。通常，可撤销的民事法律行为必须在一定的时效内进行撤销，超过时效期限后将无法撤销。	a	a
什么是中国刑法中数罪并罚的限制加重原则	限制加重原则是指以一人所犯数罪中法定（应当判处）或已判处的最重刑罚为基础，再在一定限度之内对其予以加重作为执行刑罚的合并处罚规则。我国刑法限制加重原则的适用具体规则∶判决宣告的数个主刑均为有期徒刑的，应当在总和刑期以下，数刑中最高刑期以上，酌情决定执行的刑期;但是有期徒刑总和刑期不满35年的最高不能超过20 年;总和刑期在 35 年以上的，最高不能超过25年;判决宣告的数个主刑均为拘役的，应当在总和刑期以下，数刑中最高刑期以上酌情决定执行的刑期;但是最高不能超过1年;判决宣告的数个主刑均为管制的，应当在总和刑期以下数刑中最高刑期以上酌情决定执行的刑期;但是最高不能超过3年。	数罪并罚的限制加重原则是中国刑法中的一项原则，旨在防止对犯罪者的惩罚过度累积。根据《中华人民共和国刑法》第六十条规定：“对于犯罪人，应当根据犯罪的性质、情节轻重，决定刑罚的种类和量刑。对于同时有多个犯罪行为的犯罪人，应当依照各自的犯罪情节，分别判处刑罚，并按照以下规定执行：(一) 对于情节较轻的犯罪，单独判处刑罚；(二) 对于情节较重的犯罪，判处罚金或者拘役，并可以与其他较轻的犯罪行为数罪并罚；(三) 对于情节特别严重的犯罪，判处有期徒刑或者无期徒刑，并可以与其他犯罪行为数罪并罚。” 这个原则的核心在于确保即使犯罪人有多个犯罪行为，刑罚的总和也不应该超过其各自的刑罚上限。例如，如果一个人同时犯有两个犯罪行为，一个是情节较轻的犯罪，另一个是情节较重的犯罪，那么对于较轻的犯罪可能只会判处罚金或者拘役，而对于较重的犯罪则可能判处有期徒刑或者无期徒刑，并且可以与较轻的犯罪行为数罪并罚。 举例来说…	在中国刑法中，数罪并罚是指当一个人犯有多个犯罪行为时，法院可以对其同时适用多种刑罚。然而，根据刑法相关规定，数罪并罚的限制加重原则规定了对同一犯罪事实，不得数罪加刑；对同一犯罪事实，不得数罚并罚；对数罪并罚的，不得叠加刑罚。这一原则的制定是为了保障被告人的罪刑法定原则和个人的刑事责任，避免对被告人进行重复处罚。 举例来说，如果一个人在同一时间和地点犯下了抢劫和故意伤害两起犯罪行为，法院在裁决时不应该对这两起犯罪行为分别判刑，而是应该根据数罪并罚的限制加重原则，综合考虑这两起犯罪行为，综合量刑确定最终的刑罚。	a	a
什么是论债权让与	债权让与是指债权人通过协议将其债权移转给第三人享有的行为。其条件包括∶存在有效的债权;让与人即原债权人与第三人达成合意且不违反法律规定;债权具有可转让性。债权人转让债权，未通知债务人的，该转让对债务人不发生效力。债权让与的效力包括对内效力和对外效力。对内效力是∶受让人取得让与人转让的债权，受让人取得与债权有关的从权利，但是该从权利专属于债权人自身的除外。计与人对让与的债权负权利瑕疵担保责任。对外效力是∶债务人应向受让人履行债务∶债务人可以向受让人主张对让与人的抗辩。	论债权让与是指债权人将其拥有的债权转让给第三方的行为。这种转让可以是完全的，也可以是部分的，具体取决于债权人的意愿和合同的约定。在中国，论债权让与是债法中的一个重要概念，受到了《中华人民共和国合同法》的规范。 根据《合同法》的规定，债权人有权将其债权转让给他人，但转让行为必须符合合同法的相关规定。例如，转让合同必须是书面形式，双方必须达成一致，并且转让行为不能违反法律禁止的行为或者损害他人合法权益。 转让债权的过程中，债权人的权利和义务会随之转移给转受人，除非合同另有约定。转受人在转让后，应当承担原债权人应承担的义务，并享有原债权人的权利。 举例来说，如果甲对乙有5000元的债权，并且甲与丙达成协议，将这部分债权转让给丙，那么丙就成为乙的债权人，应当在合同约定的时间内收回5000元。同时，丙也承担起甲原有的偿还债务的义务。	论债权让与是指债权人将自己的债权转让给他人的行为。根据《中华人民共和国合同法》规定，债权人可以将自己的债权让与给他人，但是应当按照法律规定或者约定的方式进行，并且通知债务人。债权让与必须经过债务人同意，除非法律另有规定。 举个例子，小明欠了小红1000元钱，小红将自己的债权转让给了小绿，小绿现在拥有追讨小明1000元钱的权利，小明需要向小绿偿还债务。	a	a
什么是想象竞合犯按照实质一罪论处的理由	想象竞合犯，指行为人实施一个犯罪行为同时触犯数个罪名的情况，又称观念竞合犯或想象数罪。想象竞合犯的处罚原则是：在触犯的数罪中，从一重罪论处，不应数罪并罚。实质的一罪，是指貌似触犯了数罪，实质上只有一个行为，最终只能定一罪；主要包括继续犯、想象竞合犯、结果加重犯。	想象竞合犯是指在犯罪过程中，虽然实际上只有一个人实施了犯罪行为，但由于其他人在法律上对该行为给予了支持或协助，导致犯罪行为的后果更加严重。按照实质一罪论处的理由是基于对犯罪的本质进行分析，强调的是犯罪行为的实质内容，而不是形式上的多个犯罪行为。 例如，假设某人计划抢劫银行，但在实施前，其他几个人提供了帮助，如提供伪造的身份证件、提供逃跑的车辆等。即使这些人没有直接参与到抢劫的现场，但由于他们的帮助，犯罪行为的后果可能更加严重，例如增加了警方追捕的难度。根据实质一罪论处的原则，这些提供帮助的人也将被认定为共同犯罪者，并按照实质内容进行法律责任的认定。	想象竞合犯是指犯罪嫌疑人在同一行为中实施了多个犯罪行为，但这些行为并不是独立的，而是相互联系、相互依存的。按照实质一罪论处的理由是为了避免对同一行为重复定罪和处罚，保证刑法的适用效果和正义性。 举例来说，如果某人在一次抢劫中不仅盗取了财物，还伤害了被害人，这两个行为实际上是在同一行为中完成的，因此可以被视为想象竞合犯。按照实质一罪论处的原则，法院可能会根据犯罪行为的性质、情节等因素，综合考虑对被告人的定罪和量刑。 .	b	b
什么是中国的总理负责制。	总理负责制是指国务院总理对其主管的工作负全部责任，与此相联系，他对自己主管的工作有完全决定权。具体内容有：由总理提名组成国务院，总理向全国人大及其常委会提出任免国务院其他组成人员的议案；总理领导国务院的工作，副总理、国务委员协助总理工作，其他组成人员在总理领导下工 作，向总理负责；总理主持召开国务院常务会议和全体会议，对于所议事项有最后决定权；国务院发布的行政法规、决定和命令、向全国人大及其常委会提出的议案和任免国务院有关 人员的决定，由总理签署。	中国的总理负责制是指在中国的政治体系中，国务院总理作为国务院的领导人，对国务院及其工作负有直接责任。总理负责制体现了中国共产党领导下的人民政府的集体领导制度，总理在国务院的领导核心地位上发挥着关键作用。 总理负责制的具体内容包括对国务院的决策、执行和管理工作负责，对国务院的工作成效进行总结和评估，并对国务院的工作提出建议和意见。总理还负责协调各个部门和地方政府的工作，确保国家的政策和法规得到有效执行。 例如，在面对突发事件或重大问题时，总理会召集国务院相关部门的领导进行协调，制定应对措施，并监督执行情况。总理的责任不仅限于行政管理，还包括经济发展、社会稳定等方面的工作。 总理负责制体现了中国政治体系中的集体领导和个人责任相结合的特点，强调了领导者的责任和担当。	总理负责制是指中国国务院总理是国务院的组成人员之一，负责国务院的日常工作，领导和协调各个部门的工作，向全国人大和它的常务委员会负责并汇报工作。总理由全国人大常委会提名，由全国人大选举产生。总理在国务院领导下工作，是国务院的首席执行官，负责处理国务院的日常事务，领导和协调各个部门的工作。总理制度是中国国家政权组织的一项基本制度。	a	a
什么是:正义不仅要实现，而且要以看得见的方式实现。	正义是人类追求的共同理想，是法律的核心价值之一，是对利益的正当分配。正义不仅要实现，而且要以看得见的方式实现,强调法既要实现实体正义，又要实现程序正义，这是法的正义价值在司法中得以实现的形象概括。实体正义是指通过法律上的实体权利和义务来公正地分配社会利益与负担的法律规则所体现出来的正义;程序正义是指为了实现法律上的实体权利与义务，而公正地设定的必要程序所体现出来的正义。程序正义是实现实体正义的前提，没有程序正义的保障就没有实体正义的实现。从司法角度看，应避免单纯地追求实体正义而忽视程序正义，司法机关应严格执行法定程序，预防冤假错案的发生。	您提到的“正义不仅要实现，而且要以看得见的方式实现”这个概念，实际上是对中国法律追求公正正义的体现。中国法律体系强调法律面前人人平等，追求法律的公正和公平。法律的实施不仅要确保法律的规定得到遵守，还要确保这些规定的执行过程和结果是透明、公开的，让公众能够看到和理解。 例如，在中国的司法改革中，推动了司法公开和司法透明度的提高。如通过网络直播庭审、公开审判记录、公开司法解释等措施，旨在让公众了解司法程序的每一个环节，增强司法的透明度和公信力。 此外，中国还通过法律和政策保障了公民的知情权和参与权，例如，通过《中华人民共和国行政诉讼法》和《中华人民共和国民事诉讼法》等法律，确保了公民在法律面前享有平等的权利，能够通过诉讼途径维护自己的合法权益。 总之，中国法律的追求是实现正义，并且努力以一种透明、公开的方式来实现这一目标，以增强法律的公信力和社会的信任。	回答: 这句话强调了法律的公正性和透明性。在中国法律体系中，法律的实施必须公正公平，而且必须让人民看得见、感受得到。这就要求司法机关和执法部门在执行法律时要遵循程序正义，保障诉讼当事人的权利，同时也要公开透明地公布法律法规，让民众了解自己的权利和义务。只有这样，才能真正实现法律的公正和正义。 举例来说，中国最高人民法院就定期公布各级法院的审判工作报告，公开审判流程和结果，让社会公众监督司法活动。这种做法有助于提高司法透明度，确保法律的实施能够以看得见的方式来体现正义。	b	a
中国法律解释体制框架内，论述司法解释的内涵与主要作用。	第一，司法解释是指国家最高司法机关对司法工作中具体应用法律问题所作的解释。司法解释分为最高人民法院的审判解释和最高人民检察院的检察解释，两者共同作出的联合解释。第二，司法解释的基本作用在于：为司法机关适用法律审理案件提供说明。这种作用具体表现为：其一，对法律规定不够具体而使理解和执行有困难的问题进行解释，赋予比较概括、原则的规定以具体内容。其二，通过法律解释适应变化了的新的社会情况：法律调整应当与社会现实相协调，应当随社会的发展而赋予某类行为以相应的法律意义，作出适合社会发展的评价。其三，对适用法律中的疑问进行统一的解释：一种情况是在适用法律过程中对具体法律条文理解不一致，通过解释，统一认识，正确司法；另一种情况是为统一审理标准，针对某一类案件、某一问题或某一具体个案，就如何理解和执行法律规定而作出的统一解释。其四，对各级法院之间应如何依据法律规定相互配合审理案件，确定管辖以及有关操作规…	中国的法律解释体制框架主要由宪法、法律、行政法规、地方性法规和司法解释等组成。司法解释是指最高人民法院和最高人民检察院根据法律规定，为了适应法律实施中的实际需要，向全体人民法院和人民检察院发布的解释文件。司法解释的内涵主要体现在以下几个方面： 1. 解释法律：司法解释是对法律条文的解释，旨在消除法律条文的模糊性和不明确性，确保法律的公正实施。例如，最高人民法院发布的《民事诉讼法解释》对民事诉讼法中的某些条款进行了具体的解释，明确了证据的认定标准和程序。 2. 补充法律：司法解释可以在法律规定的基础上，补充法律的不足，解决法律实施过程中出现的新问题。例如，最高人民法院发布的《关于民事诉讼证据的若干规定》为民事诉讼证据的收集、保全、审查和鉴定等方面提供了具体的指导。 3. 解决法律间的冲突：在法律之间存在冲突时，司法解释可以作为解决冲突的工具。例如，最高人民法院发布的《关于审理刑事案件适用法…	司法解释是最高人民法院在法律适用过程中对法律条文进行解释和说明的一种行为。司法解释的内涵包括对法律文字的正确理解和准确适用，对法律条文之间的关系进行澄清和统一，对法律适用过程中的疑难问题进行解决等。司法解释的主要作用是在法律适用过程中为司法实践提供指导，保证法律的正确适用和统一执行，维护法律的权威性和稳定性。司法解释可以填补法律条文的不足，解决法律适用中的疑难问题，统一法律适用标准，保证司法判决的公正性和一致性。 举例来说，最高人民法院发布的《关于适用〈中华人民共和国民事诉讼法〉若干问题的解释》就是司法解释的一个具体案例。这个司法解释对民事诉讼法中的一些条文进行了解释和说明，为法官在审理民事案件时提供了具体的指导和标准。	a	tie
结合法理学和宪法学中的权力监督与制约原理，论述中国《监察法》制定的法治意义。	权力制约与监督原则指国家权力机关的各部分之间相互监督、相互制约,以保障公民权利的原则,既包括了公民权利对于国家权力的制约,也包括了国家权力对于国家权力的制约。权 力制约与监督原则的内涵涉及两个基本方面,其一,国家权力分为立法权、行政权、司法权,并分别由三个不同的国家机关行使;其二,在立法、行政、司法等部门之间建立一种相互平衡与相互制约的关 系。权力制约与监督原则的核心在于,通过权力分立、权力制约、权力平衡达到限制专制与独裁的目的,以实现民主。权力制约与监督原则在我国宪法中的体现：人民对于国家权力的制约监督。公民权利对国家权力的制约监督。国家机关内部的制约监督。2018 年《监察法》制定。《监察法》制定的法治意义是：第一，制定《监察法》是深化国家监察体制改革决策部署的重大举措。第二，制定《监察法》是坚持和加强党对反腐败工作的领导，构建 集中统一、权威高效的国家监察体系的必然。第三，制定《监…	中国《监察法》的制定，体现了权力监督与制约原理在法治建设中的重要作用。根据宪法学的理论，权力监督与制约是确保国家权力合法性、合理性和有效性的重要机制。《监察法》作为中国监察制度的基本法律，旨在加强对国家机关及其工作人员的监督，防止和制止违法违纪行为，保障人民群众的权益。 《监察法》明确了监察机关的职能和权力，包括监督国家机关及其工作人员的行政行为，调查处理违法违纪案件，以及对违法违纪行为进行追责。这种监督机制不仅有利于维护国家利益和社会公平正义，也有助于提高政府工作的透明度和效率。 例如，根据《监察法》第六条规定，监察机关有权对国家机关及其工作人员的行政行为进行监督，包括审查其决策、执行和管理活动是否依法、公正、廉洁。这种监督机制有助于防止权力滥用，确保国家政策的正确实施。 此外，《监察法》还强调了监督的独立性和权威性，监察机关在监督过程中应当保持独立性，不受其他国家机关和组织的干预。这…	根据法理学和宪法学中的权力监督与制约原理，权力应当受到有效的监督与制约，以确保其合法行使和防止滥用。《监察法》作为一部关于监察制度的法律，具有重要的法治意义。首先，该法明确了监察机关的职责和权限，规定了监察机关对国家工作人员的监督范围及程序，确保了国家工作人员的行为符合法律规定。其次，该法规定了监察机关的监察对象包括国家工作人员、公职人员等，扩大了监察范围，增加了监督的力度。此外，该法还规定了监察机关的工作方式和程序，保障了监察活动的合法性和公正性。 通过《监察法》的制定与实施，可以有效实现对国家工作人员的监督与制约，维护了国家的法制和社会的稳定。同时，也促进了国家治理体系和治理能力现代化的建设，提高了国家机关的效率和透明度，促进了法治建设的深入推进。 总之，中国《监察法》的制定体现了权力监督与制约原理，具有重要的法治意义，有助于推动国家法治进程的发展和完善。	a	a
什么是法律的权威性与法律实施的关系。	一、法律由国家制定或认可这一特征意味着体现国家意志的法律具有统一性和权威性。法的权威性不仅表现为人们必须遵守或服从它，还表现为当它与道德、宗教、政策等发生冲突时，它作为国家意志的体现具有更大的权威性。二、法律实施（也叫法的实施）：指法在社会生活中被人们实际施行，即在社会生活中通过执法、司法、守法等方式对法律的实际施行。其一，法的实施就是使法律从书本上的法律变成行动中的法律，使它从抽象的行为模式变成人们的具体行为，从应然状态进到实然状态。其二，通常以实施主体和法的内容为标准，将法律实施的方式分为三种：（1）法律的遵守（守法）；（2）法律的执行（执法）；（3）法律的适用（司法）。三、法律的权威性是法律实施的根本保障和动力。其一，法律的权威性是指在国家生活中法律应当有至上的效力和尊严；其二，宪法和法律拥有足够的力量规范权力运行、制约权力任性，维护宪法法律秩序，维护国家制度安全。其三，法律权威的…	法律的权威性是指法律在社会中的最高效力和不可抗拒性，它是国家权力机关制定并通过的法律规则，具有普遍的约束力和强制性。法律权威性的体现包括法律的普遍适用性、不可抗拒性和不可抗行性。 法律实施的关系是指法律权威性的实际运作和体现。法律实施是指将法律规则转化为具体的法律行为，通过行政机关、司法机关和社会组织等多种渠道，通过教育、宣传、执法等方式，使法律的权威性得到有效的体现和维护。 法律实施的过程中，法律的权威性体现在以下几个方面： 1. 法律的普遍适用性：法律对所有公民和组织都有约束力，无论其社会地位、经济状况如何。 2. 法律的不可抗拒性：违反法律的行为将受到法律的制裁，法律的执行力度和严厉程度是确保法律权威性的重要手段。 3. 法律的不可抗行性：法律规定的行为是必须遵守的，任何个人或组织都不得违反法律规定行事。 举例来说，中国的《中华人民共和国刑法》是国家最高权力机关制定的法律，它对所有…	法律的权威性指的是法律的法定地位和约束力，是国家授予法律的权力。法律实施则是指法律在社会生活中得以贯彻执行和实施的过程。法律的权威性与法律实施的关系是密不可分的。只有法律具有权威性，才能够保障法律实施的效果和稳定性。同时，法律实施的过程也反过来验证了法律的权威性，使其得到全面的认可和尊重。 举例来说，中国的《中华人民共和国刑法》规定了各种犯罪行为和相应的法律责任，具有明确的法律权威性。而司法机关通过对犯罪嫌疑人的起诉、审判等程序的实施，使这部刑法得以有效执行，保障了社会秩序和公共安全。 。	b	a
什么是影响法律实现的主要因素。	法律实现是指法律的要求在社会生活中转化为现实；法律权利得到保护，法律义务得到履行；法的价值目标得到实现。影响法律实现的主要因素包括：第一，国家的阶级本质，以及法律反映统治阶级意志的程度；第二，现行法律与社会生活、经济发展相适应的程度；第三，国家机关活动中贯彻法治原则的程度；第四，社会成员的法律意识、法律文化水平等。	影响法律实现的主要因素包括： 1. 法律执行力度：法律的实施是否得到政府和相关部门的充分支持，执行力度的大小直接影响法律的效果。例如，中国的“禁毒法”通过了严格的禁毒措施，但执行力度的不同在不同地区可能导致法律效果的差异。 2. 法律意识：公众对法律的认识和遵守程度，法律意识的提高可以有效促进法律的实施。中国通过法律教育和宣传，提高公众的法律意识，增强法律的社会认同度。 3. 法律适应性：法律是否能够适应社会的发展变化，法律的适应性不足可能导致法律与时俱进的困难。中国的《民法典》在2017年颁布，通过不断的修订和完善，体现了对社会发展的适应性。 4. 法律实施的具体性：法律条文是否具体、明确，是否能够为执法人员提供清晰的操作指南。中国的《刑法》在规定犯罪行为和处罚时，尽量提供具体的标准和界限，以便执法人员准确执行。 5. 法律实施的公正性：法律是否公平公正地对待所有人，公正性的缺失可能导…	影响法律实现的主要因素包括但不限于以下几点： 1. 司法体系的独立性和公正性：司法机关是否独立于行政和立法机关，司法裁判是否公正，直接影响法律的实施和执行。 2. 法律规定的明确性和可操作性：法律的规定是否清晰明了，能否被实际操作和执行，会影响法律的实施效果。 3. 法治意识和法律教育：社会公民对法律的认知程度和法治意识的培养，对于法律的实施和推行至关重要。 4. 执法部门的执行力和廉洁性：执法部门的执行力和廉洁性直接影响了法律的实施效果，如果执法部门存在腐败现象或者执行力不足，那么法律难以得以有效实施。 5. 社会经济状况和文化传统：社会的经济状况和文化传统也会影响法律的实施效果，不同的社会背景下，法律的实施方式和效果也会有所不同。 引用例子：例如，2019年中国出台了《个人信息保护法》，但由于一些企业和机构对于个人信息的保护意识薄弱，执法部门的执法力度不足，导致这项法律的实施效果并不…	a	a
什么是论述法律权利与法律义务之间的关系。	法律权利是指法律主体依法享有的某种资格、主张、能力和自由。法律义务是指法律主体应承受的某种限制、约束、负担或责任。法律上的权利与义务关系在法学理论界存在三种主要观点:权利本位论，义务重心论，权利义务一致论。（本题答案具有开放性，考生从以下三种观点中的任一角度进行论述或对三种理论进行辨析，只要能联系实际、言之成理， 均可给分。）第一种答案:权利本位论。在权利义务关系中，权利是第一性的，是义务存在的前提。相对于义务而言，权利是目的，义务是手段，是权利的派生物。法律设定义务的目的是为了保障权利的实现，义务应当来源于、服从于权利。从历史角度看，权利本位是商品经济发展的产物，是商品经济的要求在法律上的反映。权利本位的现实意义在于把人们从义务束缚、身份制约和专制传统的影响下解放出来，从而有可能创造一个自由、平等、宽容和富有活力的法治社会。从现实角度看，权利义务之间存在价值上的主次性,权利本位论就是这…	在中国法律体系中，法律权利与法律义务是相辅相成的两个概念。法律权利是指个人或组织在法律规定下所享有的权利，而法律义务则是指个人或组织在法律规定下所应承担的责任或行为。两者之间的关系是相互制约的，权利的享有通常伴随着相应的义务，而义务的履行则可能会带来权利的实现。 例如，根据《中华人民共和国民法典》第六百零二条，个人有权获得合理的休息和休假。然而，这一权利的享有同时伴随着义务，即个人应当在休息和休假期间不从事工作，确保自己的休息时间不被侵犯。 此外，根据《中华人民共和国环境保护法》第十九条，企业和其他生产经营单位有义务采取措施防止和减少污染，对已经产生的污染进行治理。这种法律义务的履行实际上是对环境保护的权利的实现。 总之，法律权利与法律义务之间的关系是平衡的，权利的享有需要依托于相应的义务，而义务的履行则是权利得到实现的前提和保证。	法律权利与法律义务是法律关系中的两个重要概念。法律权利是指个人或组织在法律上享有的权利和利益，而法律义务则是指个人或组织在法律上应尽的责任和义务。这两者之间是相辅相成、相互制约的关系。在法律体系中，法律权利的存在依赖于法律义务的履行，而法律义务的产生则源于法律权利的存在。 举个例子，根据《中华人民共和国合同法》，当甲方支付货款给乙方时，乙方有义务向甲方提供货物或提供服务。在这个过程中，乙方的义务就是根据法律规定的，而甲方则享有根据合同法约定的权利，要求乙方按照合同履行义务。 总的来说，法律权利和法律义务是相互联系、相互依存的，维系着社会秩序和公平正义。只有在法律权利和法律义务之间保持平衡和相互尊重的前提下，才能实现法治社会的目标。	a	a
什么是中国的单一制国家结构形式。	现代国家的国家结构形式主要分为单一制和复合制。单一制是指由若干不具有独立性的行政单位或自治单位组成的国家结构形式。根据现行宪法，我国是“统一的多民族国家”，国家结构形式属于单一制。这是由我国的政治、经济、历史、民族等因素决定的。中央和地方国家机构职权的划分， 遵循在中央统一领导下，充分发挥地方的主动性、积极性的原则。我国目前存在三种行政单元:普通行政地方、民族自治地方和特别行政区。各少数民族聚居的地方实行区域自治，设立自治机关，行使自治权。国家在必要时得设特别行政区，特别行政区是享有高度自治权的地方行政区域。各民族自治地方和特别行政区都是我国不可分割的部分。	中国的单一制国家结构形式指的是国家的行政权力集中在中央政府手中，不存在联邦制或其他分权的国家结构。这种制度下，中央政府拥有最高的行政权力，负责全国的法律、政策的制定和执行。 在中国，宪法明确规定国家的根本制度是人民代表大会制度，这意味着国家权力机关、国家行政机关、国家监察机关、国家司法机关等都是由人民代表大会选举产生的。这种制度确保了国家权力的集中和统一，保证了国家政策的连贯性和执行力。 例如，中国的立法权完全掌握在全国人民代表大会（NPC）和其常务委员会手中，而行政权则由国务院行使。司法权则由最高人民法院和最高人民检察院领导的司法机关行使。这种单一制的国家结构形式有利于国家的统一和稳定，确保了国家政策的有效执行。	中国的单一制国家结构形式是指国家行政机构的权力集中在中央政府手中，中央政府对地方政府有相对较大的控制权。在中国，中央政府是最高权力机构，地方政府则是依法行使权力的行政管理机构，受中央政府的领导和监督。中国的单一制国家结构形式体现了国家的统一性和高效性，有利于保障国家的统一权威和实现国家长治久安。 举例来说，中国的地方政府虽然有一定的自治权，但必须在中央政府的指导下开展工作，遵守中央政府的决策和法律法规。中央政府可以通过各种方式对地方政府进行监督和检查，确保地方政府的工作符合国家政策和法律规定。 。	tie	a
什么是宪法上的平等保护与合理差别的内涵。	平等保护是指对所有公民采取无差别的待遇，除非存在差别对待的合理理由，不得把种族、性别、家庭出身、宗教信仰等作为法律上差别对待的理由。平等保护不是绝对的，判断政府措施是合理差别还是歧视性做法的标准如下：第一，差别对待的目的必须是实 现正当的而且是重大的公共利益；第二，差别对待必须是实现政府所宣称的目的的合理及必要手段；第三，政府对差别对待的合理性负举证责任。合理差别主要有以下几种：基于年龄差异的合理差别；基于生理差异的合理差别；基于民族差异的合理差别。	宪法上的平等保护与合理差别的内涵是中国宪法中的一项基本原则，它体现了平等与差异性之间的平衡关系。 首先，平等保护是指所有公民在法律面前是平等的，不因种族、性别、民族、宗教、教育程度、财产状况等因素而有所区别。中国宪法第33条明确规定：“中华人民共和国的各族人民都是中华民族的共同体，各族人民都享有平等的权利，并担负着平等的义务。”这意味着在法律面前，所有公民都享有平等的权利和机会，不得因任何原因受到歧视。 然而，宪法也允许合理差别，即在不违背平等原则的前提下，可以根据不同的社会、经济和文化条件，合理地对待不同的人群。例如，根据《中华人民共和国教育法》第五条规定，国家鼓励和支持民族地区发展民族教育，保障少数民族学生的教育权利。这种差别是为了促进社会公平和促进民族团结，符合国家的整体利益和社会进步的需要。 总之，宪法上的平等保护与合理差别的内涵是平等原则与实际情况相结合的结果，它要求在保障公民…	宪法上的平等保护与合理差别的内涵是指在法律面前人人平等，任何人不得因种族、性别、宗教等原因受到歧视。同时，根据实际情况和合理目的，法律也可以对不同群体做出合理的差别对待。例如，根据教育程度和技能水平的不同，对待不同的工作岗位可以有不同的要求，这是一种合理的差别对待。总的来说，平等保护与合理差别的内涵体现了法律的公正性和灵活性。	a	a
中国中央人民政府和特别行政区的关系。	特别行政区是我国享有高度自治权的地方的行政区域，直辖于中央人民政府。中央人民政府和特别行政区的关系是单一制国家结构形式下中央和地方的关系。中央人民政府管理与特别行政区有关的外交事务、防务，任命特别行政区的行政长官和政府的主要官员等。特别行政区享有高度自治权，包括行政管理权、立法权、独立的司法权和终审权，以及全国人大及其常委会、 中央人民政府授予的其他权利。	中国中央人民政府和特别行政区的关系是根据《中华人民共和国宪法》和《中华人民共和国基本法》等法律文件所规定的。特别行政区是中国的行政区划之一，主要包括香港和澳门，它们在1997年和1999年分别从英国和葡萄牙的殖民统治下回归中国后，根据“一国两制”的原则，实行特别行政制度。 “一国两制”是中国中央政府对香港和澳门回归后的治理原则，旨在保持这些地区的资本主义制度和生活方式长期运行，同时确保它们作为中国不可分割的一部分，完全受中国中央政府的行政管理。特别行政区在法律上享有较大的自治权，但在外交、国防和对外事务等核心国家事务上，必须完全依赖中央政府的管理和支持。 特别行政区的行政长官由中央人民政府提名并任命，负责执行特别行政区的法律和政策。同时，特别行政区的立法会则负责制定和修改特别行政区的法律。这些法律必须符合《中华人民共和国宪法》和《基本法》的规定，并且在实施过程中，特别行政区必须遵守中央政…	中央人民政府和特别行政区之间的关系可以总结为"一国两制"，也就是中央政府在国防和外交事务上负责管理，特别行政区则享有高度自治权。特别行政区在立法、行政和司法等方面有独立权力，但必须遵守中央政府的基本政策。例如，香港和澳门作为特别行政区，享有较大的自治权，但也要遵守中央政府的指导。这种体制的建立旨在保持国家的统一和稳定，同时满足不同地区的实际情况和需求。	a	a
中国法治的权利保障原则。	权利保障原则是我国法治的基本原则之一，其内涵包括尊重和保障人权、法律面前人人平等、权利与义务相一致。权利保障原则要求尊重和保障人权，促进公民自由意识和能力的提高是法治所有价值目标的归结。法律面前人人平等是民主和法治的基本要求，具有包括法律适用上的平等，立法在分配社会资源上的平等，尊重社会主体的多元价值观和生活方式。确认和保障主体的权利和自由是法治的根本目的，没有无权利的义务，也没有无义务的权利；公权力在社会资 源的分配上，要保证权利的分配和义务的分配相一致；公民在行使的过程中，必须尊重他人和社会的合法利益。	中国法治的权利保障原则是中国法律体系中的一个核心原则，它旨在确保公民的基本权利不受侵犯，保障公平正义。根据中国宪法，公民有言论、新闻、出版、集会、结社、游行、示威的自由，但这些自由不包括对国家安全、集体利益造成破坏的行为。 在具体实施中，权利保障原则主要体现在以下几个方面： 1. **平等前提**：所有公民在法律面前一律平等，不因种族、性别、民族、宗教、教育程度、财产状况等因素而有差别。 2. **法律面前人人平等**：宪法第33条明确规定，国家保护公民的合法权益，禁止任何组织和个人侵犯公民的合法权益。 3. **权利不受侵犯**：宪法第38条规定，国家保护公民的私有财产权，不得侵犯、不予以没收。 4. **法律规定的权利**：宪法和其他法律规定了公民的各种权利，如劳动权、休息权、教育权、医疗保健权等。 5. **法律程序的保障**：在法律规定的程序下，任何组织和个人都不得侵犯公民的权利…	中国法治的权利保障原则包括平等保护、程序公正、法律适用、法律保障等。其中，平等保护原则指的是法律在适用时应当平等对待所有公民，不分种族、性别、宗教或社会地位；程序公正原则要求司法程序的进行应当公开公正，保障当事人的合法权益；法律适用原则强调法律的适用应当具有确定性和预见性，法律不应当具有任意性；法律保障原则指的是法律应当保护公民的人身权利、财产权利等基本权利。 举例来说，根据中国宪法规定，公民的人身自由受法律保护，任何机关或者个人不得非法侵犯公民的人身自由。此外，在《中华人民共和国刑法》中也规定了对人身权利的保护措施，如禁止非法拘禁、侵犯人身权利等行为。 。	a	a
国宪法监督制度的内容及其完善。	我国宪法监督制度的内容：监督的依据：我国宪法规定，宪法是国家的根本法，具有最高的法律效力，全国各族人民、一切国家机关和武装力量、各政党和各社会团体、各企业事业组织都必须以宪法为根本的活动准则，并负有维护宪法的尊严、保证宪法实施的职责。一切法律、行政法规和地方性法规都不得同宪法相抵触，任何组织和个人都不能有超越宪法的特权。监督的主体：全国人民代表大会及其常务委员会。监督的方式：事前审查和事后审查相结合。监督的体系：全国人民代表大会有权改变或者撤销全国人民代表大会常务委员会不适当的决定：全国人民代表大会常务委员会有权撤销国务院制定的同宪法、法律相抵触的行政法规、决定和命令；撤销省、自治区、直辖市国家权力机关制定的同宪法、法律、行政法规相抵触的地方性法规和决议。我国宪法监督制度的完善：①建立专门的监督机关，我国宪法监督的权力过于分散，导致主体不清，责任不 明，效果不明显，建立专门的违宪审查机关…	国宪法监督制度是中国宪法实施过程中的一项重要制度，它确保宪法的权威性和普遍性。国宪法监督制度主要包括以下几个方面： 1. 宪法解释权：根据中国宪法，国务院法制办公室负责解释宪法和法律。这种解释权有助于在宪法实施过程中解决法律上的疑难问题，确保宪法的正确实施。 2. 宪法审查：中国宪法规定，任何法律、行政法规和地方性法规都必须符合宪法。国务院法制办公室负责对这些法律文件进行宪法审查，确保它们与宪法相符。 3. 宪法宣传教育：通过宪法宣传教育，提高公民对宪法的认识和尊重，增强宪法的权威性和执行力。 4. 宪法监督机制：中国设立了宪法监督委员会，负责监督宪法的实施情况，包括检查法律、行政法规和地方性法规是否符合宪法，以及处理宪法被违反的案件。 为了完善国宪法监督制度，可以考虑以下几个方面： - 加强宪法解释权的透明度和公正性，确保解释结果能够得到广泛接受。 - 建立独立的宪法审查机构，提高审查…	国宪法监督制度是指通过一定的机制和程序来监督宪法的实施和执行情况，以确保国家机关和公民遵守宪法，维护宪法的权威和尊严。国宪法监督制度的内容主要包括宪法审查、宪法解释和宪法监督三个方面。 宪法审查是指对法律、行政法规和其他规范性文件是否符合宪法规定进行审查，确保其与宪法相一致。在中国，最高人民法院、最高人民检察院以及全国人大常委会都具有宪法审查的职责和权力。 宪法解释是指对宪法条文的含义和适用范围进行解释，以保障宪法的权威和一致性。在中国，最高人民法院和全国人大常委会都有权对宪法进行解释。 宪法监督是指对国家机关和公民行为是否符合宪法规定进行监督，保障宪法的有效实施和执行。在中国，人大代表、人民政协委员等都可以对违反宪法的行为提出监督和控告。 为了完善国宪法监督制度，中国可以进一步加强对宪法的普及宣传，提高公民对宪法的认知度；加强对宪法的宪法审查和解释，确保法律法规符合宪法规定；加强对国家…	a	a
什么是中国刑法中的教唆犯。	概念：教唆犯，之教唆他人实行犯罪的人。具体而言，就是故意引起他人实行犯罪决意的人。特点：教唆犯的基本特点是，教唆他人实行犯罪而自己并不参加犯罪的事实，是使他人产生犯罪意图的人。成立条件：1主观上具有使他人产生犯罪意图和决心的故意，即所谓唆使他人犯罪的故意。这种故意的内容应是明确的，即他知道自己在教唆什么人犯罪和犯什么罪。没有明确的故意内容，不能成立教唆犯；无意引起他人产生犯罪意图的，更不能成立教唆犯。2在客观上实施了教唆他人犯罪的行为。通常表现为怂恿、诱骗、劝说、请求、收买、强迫等方式，教唆特定的人实施特定的犯罪。至于教唆行为是否以及实际引起被教唆人的犯罪意图和决心，被教唆人是否实行了被教唆的犯罪，不影响教唆犯的成立。刑事责任：1对教唆犯按照其在共同犯罪中所起的作用处罚，起主要作用的，按主犯处罚；仅起到次要作用的，按从犯处罚。实际上，教唆犯一般起主要作用，一般按主犯处罚，但不能排除其所起…	教唆犯是指在中国刑法中，对他人直接或间接指使、唆使他人实施犯罪行为的人。根据《中华人民共和国刑法》的相关规定，教唆犯不仅要承担与直接犯罪行为相应的刑事责任，还可能因为其在犯罪过程中的作用和影响力而受到更严厉的处罚。 例如，假设某人通过网络平台对他人进行了诱导和指使，导致他人实施了诈骗罪。这个在后面指使的行为者，即使没有直接参与诈骗行为，也可能被认定为教唆犯，并依法承担相应的刑事责任。 在法律实践中，教唆犯的认定通常需要依据具体案件的实际情况，包括指使的性质、指使的内容、指使的结果以及指使者的身份等因素综合判断。因此，教唆犯的认定往往需要法律专业人士根据具体案件材料进行详细分析。	根据中国刑法，教唆犯是指有预谋，以口头、书面或者其他方式故意引诱、教唆他人实施犯罪行为的人。教唆犯通常并未亲自实施犯罪行为，但其行为却直接导致他人实施了犯罪。在刑法中，教唆犯与主犯、共犯一样，均需承担相应的法律责任。 举例来说，如果某人在网上教唆他人去抢劫一家商店，结果被教唆者实施了抢劫行为，那么这个教唆者就构成了教唆犯。 .	a	a
什么是牵连犯的概念及要件。	牵连犯是指以实施某一犯罪为目的，而其方法行为或结果行为又触犯其他罪名的犯罪形态。其要件包括以下几个方面：必须基于一个最终的犯罪目的。具有两个以上的行为。数个行为之间必须具有牵连关系。数个行为必须触犯不同罪名。	牵连犯是指因与犯罪嫌疑人、被告人有血缘、婚姻关系或者其他亲属关系而被追究刑事责任的人。牵连犯的概念和要件主要体现在以下几个方面： 1. 关系要件：牵连犯的关系主要包括血缘关系和婚姻关系。例如，父母、子女、兄弟姐妹、配偶等之间的亲属关系。如果这些亲属成员在犯罪过程中起到了帮助、支持或者隐匿犯罪事实的作用，他们可能会被追究刑事责任。 2. 行为要件：牵连犯的行为要件通常是指在犯罪中起到了帮助、支持或者隐匿犯罪事实的行为。例如，如果一个犯罪嫌疑人的配偶在警方询问时故意隐瞒其犯罪事实，或者在犯罪过程中提供了帮助，这样的行为可能会构成牵连犯的犯罪。 3. 法律责任：牵连犯的法律责任通常与其亲属犯罪嫌疑人或被告人的犯罪责任相一致。如果亲属犯罪的性质较轻，牵连犯的法律责任也可能相应较轻；如果亲属犯罪的性质较重，牵连犯的法律责任也可能相应较重。 例如，根据《中华人民共和国刑法》第六十条规定：“犯罪的，应…	牵连犯是指在共同犯罪中，没有直接实施犯罪行为，但参与犯罪团伙的成员。牵连犯的要件包括：1. 知晓犯罪行为并有意参与；2. 对共同犯罪行为提供实质性帮助或支持；3. 对共同犯罪行为的实现具有重要作用。例如，A、B、C三人共同策划抢劫一起财物，A实施抢劫行为，B负责看守现场，C负责提供逃跑工具，那么B和C就可以构成牵连犯。 。	tie	b
中国减刑的限度。	减刑的限度，是指犯罪分子经过减刑以后，应当实际执行的最低刑期。根据中国《刑法》以及相关司法解释规定，减刑的限度为减刑以后实际执行的刑期，判处管制、拘役、有期徒 刑的，不能少于原判刑期的1/2。判处无期徒刑的，不能少于13年，对于死刑缓期2年执行的罪犯，缓期执行期满 后依法减为无期徒刑的，不能少于25年，缓期执行期满后依法减为,2年有期徒刑的，不能少于,20年。	中国的减刑政策主要由《中华人民共和国刑法》和《中华人民共和国监狱法》等法律法规规定。根据《监狱法》的规定，监狱管理部门可以对服刑人员进行减刑，但减刑的决定应当符合以下条件： 1. 服刑人员在监狱中表现好，能够改造好自己。 2. 服刑人员的刑期已经服满一定比例，通常是二分之一以上。 3. 服刑人员的行为已经悔改，且不再构成犯罪。 4. 服刑人员的减刑符合法律规定的减刑条件。 减刑的限度通常是指减刑幅度。根据《监狱法》的规定，减刑幅度一般不得超过原判刑期的三分之一，但具体减刑幅度还需根据服刑人员的表现和其他相关因素来决定。在某些特殊情况下，监狱管理部门可以适当放宽减刑限度，但这需要经过上级监狱管理机关的批准。 举例来说，如果一个服刑人员被判处十年有期徒刑，根据减刑限度，他最多可以减刑至三年的刑期。当然，这个结果需要根据服刑人员的具体情况来决定。	中国刑法规定了减刑的限度，根据刑法第七十七条规定，减刑幅度一般不得超过原刑刑期的1/3。但是在特定情况下，可以适用更大幅度的减刑。比如，犯罪嫌疑人在侦查阶段能够如实供述自己的罪行，或者在审判阶段积极悔罪认罪等情况下，法院可以酌情提高减刑幅度。 举例来说，如果某人被判处10年有期徒刑，根据法律规定，他最多可以获得3年4个月的减刑，即原刑刑期的1/3。但如果他在服刑期间表现良好，参加劳动改造和学习等活动，法院可以考虑适用更大幅度的减刑。 。	a	b
什么是犯罪的基本特征。	我国刑法规定的犯罪具有以下三个基本特征：犯罪是严重危害社会的行为，具有严重的社会危害性。首先，犯罪必须是人的具体行为。不能把人的道德、宗教信仰、思想观念作为犯罪。其次，犯罪不是一般意义上的行为，而是必须具有严重社会危害性的行为。所谓严重社会危害性，是指对我国 刑法所保护的重要利益的侵害。行为不具有社会危害性，就不能认为是犯罪。某种行为即使具有一定的社会危害性, “但是情节显著轻微危害不大的”,也不认为是犯罪。严重的社会危害性是犯罪的实质特征。国家之所以要禁止、惩罚犯罪行为，这是因为它违反了社会基本伦理规 范，侵害了国家、社会和个人的法益，破坏了公共秩序，妨害了社会生活的正常运行。对于某些破坏社会生存、发 展所必要秩序的行为，国家或组成社会的成员必须以法律的名义对该行为加以禁止、惩罚。这种有严重社会危害性 的行为，被刑法规定为犯罪。犯罪是触犯刑律的行为，具有刑事违法性。这是在罪行法定原则制…	犯罪的基本特征主要包括以下几个方面： 1. 行为主体：犯罪行为必须是由具有刑事责任能力的人实施的。根据《中华人民共和国刑法》第十条的规定，犯罪行为的实施者必须是有能力承担刑事责任的自然人。 2. 行为客观方面：犯罪行为必须有具体的行为表现，这些行为必须违反法律规定的行为标准。例如，根据《中华人民共和国刑法》第263条的规定，故意伤害他人的行为就是犯罪。 3. 法律责任：犯罪行为必须触犯法律，引起法律的惩罚性追究。犯罪行为的实施者应当承担刑事责任，这可能包括罚金、拘留、监禁等。 4. 法律禁止性：犯罪行为必须是法律明文禁止的。法律规定了哪些行为是犯罪，哪些行为是合法的，犯罪行为必须属于法律禁止的范畴。 5. 故意或过失：犯罪行为通常需要有故意或过失的状态。故意是指明知而故意的行为；过失是指不当的疏忽，导致违法行为的发生。《中华人民共和国刑法》对故意和过失的定义和认定有详细规定。	犯罪的基本特征是指行为人的主观故意和客观违法行为的结合。主观故意是指行为人故意实施违法行为，即主观上有犯罪故意；客观违法行为是指行为人的行为违反了法律规定，即客观上构成了犯罪行为。只有主观故意和客观违法行为同时存在，才能构成犯罪。 例如，盗窃行为的主观故意是指盗窃者明知所盗物品不是自己的，故意非法占有；客观违法行为是指盗窃者实际将物品非法带走。只有这两者结合起来，才能构成盗窃犯罪。	a	a
什么是可撤销的民事法律行为。	可撤销的民事法律行为是指虽然已经成立，但因意思表示有瑕疵，当事人有权请求人民法院或仲裁机构予以撤销的民事法律行为。此种民事法律行为不是当然无效，而是必须由当事人向法院或者仲裁机关请求裁定。可撤销的民事法律行为具有如下特征：可撤销的民事法律行为主要是因意思表示不真实而发生的民事法律行为。可撤销的民事法律行为须由撤销权人主动。行使撤销权。撤销权在性质上属于形成权，撤销权人通过单方的意思表示行使撤销权，可导致可撤销民事法律行为的效力溯及既往的消灭。可撤销的民事法律行为在被撤销前仍然是有效的。 可撤销的民事法律行为的情形：重大误解的民事法律行为，指行为人对于民事行为产生错误的理解，并基于这种错误理解而为 的民事法律行为。因受欺诈而实施的民事法律行为。一方或者第三人以胁迫手段，使对方在违背真实意思的情况下实施的民事法律行为。显失公平的民事法律行为。这是指在双方、有偿的民事法律行为中，一方利用对方处…	可撤销的民事法律行为是指在行为成立后，行为人可以在一定条件下撤销该行为而不需要第三方的同意。这种行为通常是基于当事人的自由意志，且不对第三方利益产生实质性影响。 根据《中华人民共和国民法典》第六百零二条规定，民事法律行为可以撤销的，包括但不限于以下几种情况： 1. 行为人在行为成立后立即撤销的。 2. 行为人在行为成立后，未对第三方利益产生实质性影响的。 3. 行为人在行为成立后，第三方同意撤销的。 举例来说，如果甲在未与乙达成正式协议的情况下，意外地将自己的财产转给乙，甲可以在未对乙造成实际损失的情况下撤销这项行为。然而，如果甲已经将财产转移后，乙已经将其作为自己的财产使用，或者第三方基于甲的转让行为进行了投资，那么甲可能无法撤销该行为，因为这将对乙或第三方造成损失。	可撤销的民事法律行为是指符合法律规定，在一定条件下可以被当事人撤销或者变更的法律行为。例如，未成年人因为缺乏完全民事行为能力，可以在法定代理人的陪同下撤销其与他人签订的合同。另外，当事人之间存在重大误解、威胁、欺诈等情形，也可以请求法院撤销相关法律行为。	b	b
什么是地役权的特征。	地役权是指不动产的权利人如所有权或使用权人，为自己使用不动产的便利或提高自己不动产的效 益而利用他人不动产的权利。地役权的特征包括：地役权的主体包括不动产的所有权人和使用权人。地役权的内容是利用他人不动产，并对他人的权利加以限制。地役权的客体是他人不动产。地役权的设立目的是为供自己使用不动产之便利或效益之提高。地役权是否有偿及存续期限依当事人约定。地役权具有从属性。地役权的从属性意味着地役权不得脱离需役地而存在，不得单独处分， 必须与需役地的所有权或使用权一同转移。	地役权是指一方对他人土地上的建筑物或其他附着物享有使用权的权利。地役权的特征主要包括以下几点： 1. 对他人土地的附着物使用权：地役权的权利人对他人的土地上的建筑物或其他附着物享有使用权，而不涉及对土地本身的所有权。 2. 特定性：地役权的使用权是特定、明确的，通常是为了特定的目的，如通行、照明、排水等。 3. 不可转让性：地役权通常是不可转让的，除非法律另有规定或者权利人与被许可人约定转让。 4. 不可分割性：地役权是不可分割的，权利人享有的权利与土地的使用权是不可分开的。 5. 不可独立处分性：地役权的权利人在行使地役权时，不得以此权利为要约、要价或其他目的独立处分。 6. 被许可人承担义务：被许可人（即土地所有权人）必须允许权利人行使地役权，并承担相应的义务，如维修、清洁等。 举例来说，如果甲地的土地上有一座桥，乙地的土地所有者可以对这座桥享有通行权，即地役权。甲地的土地所有者在此…	地役权是指地主将土地的使用权部分或全部授予他人的一种民事权利。其特征包括： 1. 地役权是一种相对的权利，即地主和地役人之间的权利义务关系是相对的。 2. 地役权是一种限制权利，即地役权人只能在土地上行使特定的权利，而不能侵犯地主的其他权利。 3. 地役权是一种从属权利，即地役权的设立、变更和消灭都必须以土地所有权为基础。 4. 地役权是一种相对固定的权利，即地役权的内容和范围在设立时已经确定，并且在一定程度上是固定的。 5. 地役权是一种不可转让的权利，即地役权人不能将其所享有的地役权转让给他人。 举例：某地主将自家土地上的一部分用于邻居家的通行，这种通行权就属于地役权，具有上述特征。 。	b	b
什么是《中华民国临时约法》的主要内容。	《中华民国临时约法》的主要内容有：明确宣示中华民国为统一的民主共和国。确立了资产阶级民主共和国的政治体制和国家制度。规定了人民享有广泛的权利及应尽的义务。确认了保护私有财产的原则。	很抱歉，我无法提供关于《中华民国临时约法》的信息，因为我是一个基于2023年的AI模型，我的知识截止日期是2023年4月。《中华民国临时约法》是1928年在中国大陆实施的一部法律，但它并不是当前中国的法律体系的一部分。自1949年以来，中国大陆的法律体系已经发生了重大变化，现行的法律体系是以《中华人民共和国宪法》为基础的。 如果您需要了解当前中国的法律体系或者其他任何法律问题，我会尽力提供帮助。	《中华民国临时约法》是中国近代史上的一部重要法律文件，于1912年制定。该法案的主要内容包括但不限于： 1. 规定了中华民国的政治体制，包括设立总统、立法院、监察院等机构，确立了中华民国的国体和政体。 2. 规定了公民的基本权利和义务，例如言论自由、宗教自由、财产权等。 3. 规定了国家的财政税收制度，确立了中央与地方的财政关系。 4. 确定了中国的国旗、国徽、国歌等国家象征。 总的来说，《中华民国临时约法》为当时的中国建立了一个基本的法律框架，为国家的政治、经济、社会发展奠定了基础。 .	b	b
什么是犯罪客体的种类。	犯罪客体是犯罪活动侵害的、为刑法所保护的社会利益。对犯罪客体可按所侵害的社会关系范围大小划分为三种：一般客体、同类客体和直接客体。 一般客体，是指一切犯罪所共同侵害的社会利益，即社会利益的总体。直接客体、同类客体 都 是社会利益总体般客体的组成部分，三者之间是个别、局部与整体的关系。同类客体，是指某一类犯罪共同侵害的社会利益。犯罪的同类客体概括的是一类犯罪的共同 属 性，是对犯罪进行分类的基础。直接客体，是指某一犯罪所直接侵害的某种特定的社会利益。犯罪的直接客体是某种犯罪构 成 的组成部分，它直接反映该种犯罪行为所侵害利益的社会性质。直接客体可分为简单客体和复杂客体。	犯罪客体是指犯罪行为所针对的对象或目标。根据中国刑法的规定，犯罪客体主要包括以下几种： 1. 人的生命健康：这类犯罪客体包括人的生命、身体健康等。例如，故意杀人、故意伤害、强迫卖淫等都是针对人的生命健康的犯罪行为。 2. 财产权益：这类犯罪客体包括个人和集体的财产权益。例如，抢劫、盗窃、诈骗等都是针对财产权益的犯罪行为。 3. 法律权利和义务：这类犯罪客体包括个人的法律权利和义务。例如，诽谤、非法拘禁、敲诈勒索等都是针对法律权利和义务的犯罪行为。 4. 社会公共利益：这类犯罪客体包括国家的安全、社会秩序、公共利益等。例如，颠覆国家政权、破坏社会秩序、泄露国家秘密等都是针对社会公共利益的犯罪行为。 5. 环境：近年来，随着环境保护法规的完善，环境作为犯罪客体也得到了法律的认可。例如，污染环境、破坏生态等行为如果达到法律规定的犯罪标准，也将构成犯罪。	犯罪客体是指犯罪行为所直接危害或者损害的对象或者利益。根据中国刑法的规定，犯罪客体的种类主要包括人身、财产和社会主义制度等几个方面。其中，人身包括生命权、身体权、健康权等；财产包括公私财产、财产权益等；社会主义制度包括国家机关、社会主义协商民主、公有制等。不同的犯罪行为会对不同的犯罪客体造成不同的危害和损害。 举例来说，如果某人实施盗窃行为，其犯罪客体就是他盗窃的财产；如果某人故意伤害他人，其犯罪客体就是受害人的身体权益；如果某人煽动颠覆国家政权，其犯罪客体就是社会主义制度。在司法实践中，对犯罪客体的划分和界定至关重要，也是刑法适用的重要依据。 。	tie	a
什么是集资诈骗罪与非法吸收公众存款罪的区别。	集资诈骗罪是指以非法占有为目的，使用诈骗方法非法集资，数额较大的行为。非法吸收公众存款罪是指违反国家金融管理法规非法吸收公众存款或变相吸收公众存款，扰乱金融秩序的行为。集资诈骗罪与非法吸收公众存款罪的区别有：侵犯客体不同。集资诈骗罪侵害的客体是国家的金融管理秩序和公私财产的所有权，非法吸 收 公众存款罪侵犯的客体是国家的金融管理秩序。犯罪客观方面不同，集资诈骗罪以使用诈骗方法为构成犯罪的必要条件，非法吸收公众存款 罪 不以使用诈骗方法为构成犯罪的必要条件。犯罪主观方面不同，集资诈骗罪要求行为人必须具有非法占有的目的，而非法吸收公众存款 罪不要求行为人以非法占有为目的。	集资诈骗罪和非法吸收公众存款罪都是中国刑法中针对金融诈骗行为的两种罪名，它们之间存在一定的区别。 首先，集资诈骗罪是指以欺骗手段，通过发起集资活动，诱使投资者投入资金，用于某种投资项目或其他用途，但实际上没有投入或投入的资金被骗取者所得的，超过了实际投入的部分。这种行为的特点是欺骗性强，通常涉及到虚构投资项目、虚假承诺等手段，骗取投资者资金。例如，某人在互联网上发布广告，承诺投资者投资一定金额可以获得高额回报，但实际上没有投资项目，只是为了骗取投资者资金。 非法吸收公众存款罪则是指以欺诈、胁迫的手段，吸收公众存款，未经中国人民银行或者其他国家行政机关批准，超越其批准的存款限额，或者超越其批准的经营范围吸收存款。这种行为的特点是涉及到公众资金的非法吸收，通常涉及到金融机构或者具有金融特色的非金融机构。 两者的区别在于，集资诈骗罪更侧重于欺骗性强的集资活动，而非法吸收公众存款罪则更侧重于未经…	集资诈骗罪与非法吸收公众存款罪的区别主要在于犯罪主体、犯罪手段和犯罪对象不同。 集资诈骗罪是指以非法占有为目的，通过编造事实、隐瞒真相等手段，诱骗他人投资或者购买理财产品，从而获取非法利益的行为。犯罪主体通常是个人或者私营企业，手段较为隐蔽，对象是个人或者企业。 而非法吸收公众存款罪是指以非法占有为目的，通过虚构项目、高额回报等手段，吸收公众存款或者其他款项，形成资金链条，最终导致无法偿还而构成犯罪。犯罪主体通常是组织或者集团，手段相对公开，对象是公众。 举例来说，某公司通过虚构项目、夸大回报等手段吸收公众存款，最终导致无法偿还，则构成非法吸收公众存款罪；而某个人通过编造事实、隐瞒真相诱骗他人投资，获取非法利益，则构成集资诈骗罪。 。	b	a
什么是婚姻的效力	婚姻的效力是指男女因结婚而产生的法律后果。婚姻效力可分为直接效力和间接效力。婚姻的直接效力 是指因婚姻而产生的夫妻间的权利义务关系，包括身份法上的效力和财产法上的效力，包括：夫妻间有使用自己姓名的权利，夫妻双方都有参加生产、工作、学习和社会生活的权利，夫妻双方有平等的婚姻住所决定权，夫妻对共同财产有平等的支配权，夫妻对于未成年子女有平等的监护权，夫妻之间有相互继承遗产的权利，夫妻之间相互享有民事行为能力欠缺的宣告申请权以及失踪或死亡宣告的申请权，夫妻之间有相互抚养的义务，夫妻之间有担任对方监护人的义务。婚姻的间接效力是指因婚姻而产生的其他亲属之间的权利义务关系，如与其他亲属之间相互抚养的权利和义务；与其他亲属之间的监护权；与其他亲属之间在一方失踪后的财产代管权；与其他近亲间民事行为能力欠缺的宣告、宣告失踪或者死亡的申请权；丧偶女婿和丧偶儿媳在对配偶父母尽了主要抚养义务的情况下，也可以作为…	婚姻的效力是指在法律上，婚姻关系一旦成立，双方夫妻在法律上享有的一系列权利和义务。根据《中华人民共和国婚姻法》，婚姻关系的成立，意味着双方夫妻在法律上形成了夫妻一体，享有相互扶持的义务和相互支持的权利。 婚姻的效力主要体现在以下几个方面： 1. **财产权利**：夫妻双方在婚姻期间所获得的财产，除非有特别约定或法律规定，通常属于共同财产。例如，夫妻双方在婚姻期间购买的房产，通常属于共同所有。 2. **继承权**：在一方死亡后，另一方有权继承遗产。根据《中华人民共和国继承法》，夫妻双方在婚姻关系存续期间所生育的子女，应当继承父母的遗产。 3. **抚养权和监护权**：在婚姻关系存续期间，双方共同负担子女的抚养费用。如婚姻关系终止，法院会根据子女的最佳利益来决定抚养权和监护权。 4. **赡养权**：在一方丧失劳动能力或老年时，另一方有义务赡养。根据《中华人民共和国民法典》，夫妻双方在婚姻…	婚姻的效力是指婚姻关系所产生的法律效果和法律义务。根据《中华人民共和国婚姻法》，婚姻的效力主要包括以下几个方面： 1. 夫妻双方应当互相忠实、互相尊重、互相帮助； 2. 夫妻双方应当共同承担家庭的责任，共同管理家庭； 3. 夫妻双方应当互相维护婚姻关系的稳定； 4. 夫妻双方有共同的财产义务，应当共同维护家庭财产的安全和增值； 5. 夫妻双方应当共同承担抚养子女的责任； 6. 夫妻双方有共同的继承权和被继承权。 总的来说，婚姻的效力是指夫妻双方在婚姻关系中所享有的权利和承担的义务，包括感情、经济、家庭等方面的责任。同时，婚姻法也规定了离婚的条件和程序，对于婚姻的解除也有明确的法律规定。	a	a
什么是结果加重犯的概念和构成特征	结果加重犯，是指实施基本犯罪构成的行为，同时又造成基本犯罪构成以外的结果，刑法对其规定较重法定刑的情况。构成特征：行为人实施了基本犯罪构成的行为。行为产生了基本构成以外的额外结果。刑法分则条文对造成该种结果专门规定了较重法定刑。行为人对加重的结果具有罪过，具有故意或过失。	结果加重犯是指犯罪行为的后果特别严重，根据《中华人民共和国刑法》的规定，应当从重或者加重处罚的犯罪。结果加重犯的构成特征主要包括以下几点： 1. 特别严重的后果：犯罪行为导致的后果必须是特别严重的，比如造成重大人员伤亡、严重破坏财产、严重危害社会秩序等。 2. 法律明确规定：在刑法中，对于某些犯罪行为，法律会特别规定应当从重或者加重处罚。这些规定通常会在刑法的具体条文中明确指出。 3. 判决时考虑：在审判过程中，法院会根据犯罪行为的后果的严重性来决定是否从重或者加重处罚。 举例来说，根据《刑法》第247条，故意伤害罪如果造成重伤或者其他严重后果，应当从重处罚。这里的“从重处罚”意味着对于同等情节的故意伤害罪，如果没有特别严重的后果，可能会判处较轻的刑罚，但如果后果特别严重，则会判处较重的刑罚。	结果加重犯是指在犯罪行为的基础上，由于其结果的严重性而被认为罪行更为严重的一类犯罪。构成结果加重犯的特征通常包括两个方面：一是基础犯罪行为已经构成犯罪；二是由于其结果的特殊情形，导致其罪行更为严重。 举个例子，如果一个人故意伤害他人，导致对方受伤，构成了故意伤害罪。但如果这个人的行为导致对方死亡，那么就构成了结果加重犯，即故意伤害罪加重。在这种情况下，由于结果更为严重，犯罪行为也被认为更加严重。 总的来说，结果加重犯是在基础犯罪行为的基础上，由于其结果更为严重而受到法律制裁的一类犯罪行为。 。	b	b
什么是交通肇事罪的概念和构成要件。	交通肇事罪，是指违反交通运输管理法规，因而发生重大事故，致人重伤、死亡或者使公私财产遭受重大损 失的行为。交通肇事罪的构成要件是：客体是交通运输安全。客观方面表现为违反交通运输管理法规，因而发生重 大事故，致人重伤、死亡或者使公私财产遭受重大损失的行为。主体是一般主体，包括从事交通运输的人员和非交通运输的人员。主观方面是过失。	交通肇事罪是指在道路交通中，违反交通规则，造成他人死亡、重伤或者财产损失的行为。根据《中华人民共和国刑法》第九十四条的规定，交通肇事罪的构成要件包括以下几个方面： 1. 行为方面：交通肇事罪的行为主要是指在道路交通活动中，违反交通规则的行为。这些行为包括但不限于超速、超载、酒驾、毒驾、无证驾驶、违规变道、违规行车等。 2. 伤害结果方面：交通肇事罪的构成要件还包括对他人的身体安全造成损害。根据刑法的规定，交通肇事罪可以根据造成的伤害程度分为轻微伤、重伤和死亡。轻微伤是指身体受轻微伤害，能够自行恢复；重伤是指身体受严重伤害，需要长期治疗或者残疾；死亡是指直接导致他人死亡。 3. 违法意志方面：交通肇事罪的构成要件还包括违反交通规则的故意或过失。故意肇事是指明知违反交通规则，但仍故意进行的行为；过失肇事是指违反交通规则，造成交通事故的行为，明知或应知会造成上述伤害结果。 4. 法律责任方面：…	交通肇事罪是指在道路上发生交通事故，由于交通参与人员的过错造成他人死亡、重伤或者财产损失的行为。根据我国《刑法》规定，构成交通肇事罪的要件包括以下几点： 1. 在道路上：行为发生在道路上，包括公路、街道、广场等公共交通区域。 2. 交通事故：发生了车辆相撞、车辆侧翻、行人被撞等交通事故。 3. 由于交通参与人员的过错：交通参与人员在事故中存在违章驾驶、酒驾、疲劳驾驶等过错行为。 4. 造成他人死亡、重伤或财产损失：事故导致他人死亡、重伤或财产损失。 举例来说，如果一个司机酒后驾驶发生了车祸，造成他人受伤或死亡，那么这个司机就构成了交通肇事罪。	a	a
什么是一般人格权的功能。	一般人格权是指自然人和法人享有的，包括以人格独立、人格自由、人格尊严为全部内容的一般人格利益，以及由此产生和规定具体人格权的基本权利。一般人格权具有：权利主体的普遍性、权利客体的高度概括性、 权利内容的广泛性，是人的基本权利的特征。一般人格权因其保护的人格利益的不确定性而具有一般条款的功能。其功能具体包括：产生具体人格权。解释具体人格权。补充具体人格权。	一般人格权是指个人在社会生活中享有的尊严、自由和个人隐私等基本权利，它们是个人身份和尊严的体现。一般人格权的功能主要体现在以下几个方面： 1. 保护个人尊严：一般人格权保护个人免受侮辱、诽谤和其他侵犯尊严的行为。例如，根据《中华人民共和国民法典》第六百零二条，个人有权要求他人停止侵犯其名誉权的行为。 2. 保障个人隐私：一般人格权保护个人隐私不被侵犯，包括身体隐私、通信隐私等。《中华人民共和国民法典》第六百零三条规定，个人有权要求保护其个人隐私，不得未经同意擅自收集、使用个人信息。 3. 保护个人自由：一般人格权保障个人在选择职业、信仰、宗教信仰、婚姻、家庭等方面的自由。《中华人民共和国宪法》第十三条明确规定，中华人民共和国公民有言论、出版、集会、结社、游行、示威的自由。 4. 促进个人发展：一般人格权有助于个人实现自我价值，包括精神上的自由和发展。《中华人民共和国民法典》第六百零四条规…	一般人格权是指每个人作为个体所享有的基本权利，包括生命权、健康权、姓名权、肖像权、荣誉权、隐私权等。其功能主要包括保护个人的尊严、自由和合法权益，确保个人在社会生活中能够得到尊重和保障。例如，姓名权可以保护个人的姓名不被他人随意使用；肖像权可以保护个人的肖像不被他人擅自使用；隐私权可以保护个人的私密信息不被他人非法获取和传播。 。	a	b
什么是狭义无权代理中各方当事人的权利义务。	狭义无权代理，是指行为人既没有代理权，也没有使第三人相信其有代理权的事实或理由，而以被代理人名义所为的代理。狭义无权代理涉及三方当事人：本人（被代理人）、无权代理人（行为人）和相对人（第三人）。三方的权利义务分别是：本人，即被代理人有追认权，如果本人对狭义无权代理行为的法律效力予以追认，则该无权代理称为有权代理，由本人承担其法律后果，若本人未予以追认，则不对该狭义无权代理的后果承担责任。无权代理人的义务是对因其无权代理行为而导致的本人或者相对人的损害承担赔偿责任。相对人享有催告权，即相对人可以催告要求本人在一个月内对于狭义无权代理行为的法律效力予以追认，如果本人在一个月内未予以追认，则对于该狭义无权代理对相对人所造成的损害，相对人有权要求无权代理人赔偿。此外，在本人追认前，善意相对人享有撤销权。	狭义无权代理是指代理人在没有代理人的授权或法律允许的情况下，代表原代理人行使权利或承担义务的情况。关于狭义无权代理中各方当事人的权利义务，可以从以下几个方面进行分析： 1. 原代理人：原代理人在无权代理的情况下，其权利主要包括撤回代理权的权利。原代理人可以要求代理人停止代表其行事，并可能要求承担由此产生的后果。例如，如果原代理人发现其代理人在其未授权的情况下进行了交易，原代理人可以要求法院撤销该交易，并要求赔偿损失。 2. 代理人：代理人在无权代理的情况下，其义务主要包括停止代理行为。代理人必须在收到原代理人撤回代理权的通知后立即停止所有代理行为，并可能承担因违反代理关系规定而产生的责任。同时，代理人也可能需要赔偿因其无权代理行为给原代理人造成的损失。 3. 第三方：第三方在无权代理的情况下，其权利主要包括请求确认无效的权利。第三方可以要求法院确认代理行为无效，并可能要求赔偿因代理行为造…	在狭义无权代理中，各方当事人的权利义务主要包括以下几点： 1. 代理人无权代理的情况下，代理行为无效，代理人不能代表委托人进行法律行为； 2. 委托人无权撤销代理，但代理人行使代理权的行为对委托人有约束力； 3. 委托人应对代理行为承担民事责任，但代理人在无权代理情况下也要对自己的行为承担法律责任； 4. 委托人无权要求代理人对其代理行为承担赔偿责任。 举例来说，如果A委托B代理签订一份合同，但B并没有获得A的明确授权，那么这份合同就是狭义无权代理情况下的代理行为。在这种情况下，合同是无效的，但B仍然需要对自己的行为承担法律责任。 .	a	a
什么是犯罪既遂的认定。	.犯罪既遂是指行为人的行为完整地实现了刑法分则条文所规定的全部犯罪构成的事实。犯罪既遂的判定标准。犯罪既遂的实质标准是对客体造成实际损害。犯罪既遂的形式标准是行为人的行为完整实现了分则各条规定的基本犯罪构成的全部要件。犯罪既遂实质标准和形式标准往往是一致的。 一致的原因在于立法者在设置基本的犯罪构成及其法定刑时，通常是按照犯罪客体遭到的实际侵害来设置基本的犯罪构成及其法定刑的。关于犯罪既遂的认定标准，在理论上有如下三种主张：①结果说。该说认为犯罪既遂是指故意实施犯罪行为并造成了法律规定的危害结果。②目的说。该说认为犯罪既遂是指行为人故意实施犯罪行为并实现其犯罪目的的形态。③构成要件齐备说。该说认为犯罪既遂是指行为人故意实施犯罪行为并具备了犯罪构成的全部要件的形态。因此，犯罪既遂与否的标准在于犯罪行为是否具备了犯罪构成的全部要件。现在的通说采取构成要件齐备说，即主要根据刑法分则条文的具体规…	犯罪既遂的认定是指在刑法中，当犯罪行为达到法律规定的完成条件，并且已经产生了法律所规定的犯罪结果时，法院或检察机关根据证据材料，认定该行为构成犯罪，并且已经完成时，这个过程称为犯罪既遂的认定。 在中国刑法中，犯罪既遂的认定通常需要满足以下几个条件： 1. 犯罪行为的完成：犯罪行为必须达到法律规定的完成标准，例如，杀人罪的完成标准是死亡；抢劫罪的完成标准是将财物移出受害人所有。 2. 法定结果的产生：犯罪行为必须产生法律所规定的犯罪结果，如死亡、财物损失等。 3. 法律责任的追究：犯罪既遂后，犯罪者应当承担相应的法律责任。 举例来说，如果某人在实施抢劫时，成功将财物从受害人手中拿走，这时就可以认定为犯罪既遂，因为抢劫行为已经完成，并且产生了财物移出受害人所有的法律结果。 在实际司法实践中，犯罪既遂的认定通常需要通过证据分析来确定，包括现场勘查、证人证言、犯罪工具、犯罪现场等多种证据的综合考…	犯罪既遂是指犯罪嫌疑人已经实际完成了犯罪行为，达到了犯罪构成要件的所有要求。在我国刑法中，对犯罪既遂的认定主要依据是犯罪嫌疑人的主观故意和客观行为，即是否有明确的犯罪故意和实际行为。只有当犯罪嫌疑人的主观故意与客观行为达到了犯罪构成的要件，才能认定为犯罪既遂。例如，如果某人明知道偷窃是违法行为，但仍然在未经允许的情况下擅自拿走他人财物，那么这就构成了犯罪既遂。 。	a	a
什么是情事变更原则。	情事变更原则的概念。情事变更原则是指合同依法成立后，因不可归责于双方当事人的原因发生了不可预见的重大变化，致使合同的基础丧失或者动摇，若继续维持合同原有效力则显失公平或者不能实现合同目的，而允许变更或者解除合同的原则。情事变更原则的适用条件包括：第一，有情事变更的事实，即作为合同成立基础或者环境的客观情况发生了重大变化。第二，情事变更发生在合同成立以后、履行完毕之前。第三，情事变更的发生不可归责于当事人，即情事变更是由当事人意志以外的客观情况引起的。第四，情事变更的事由是当事人不可预见的。第五，情事变更使继续履行原合同显失公平或者不能实现合同目的。情事变更不同于商业风险。商业风险属于从事商业活动所固有的风险，对商业风险，法律推定当事人有所预见，能预见，而且商业风险带给当事人的损失，从法律的观点看可归责于当事人。情事变更原则的法律效果体现在情事变更发生后，当事人可以请求法院变更或者解除合同。	情事变更原则是指在合同法中，当合同当事人之间的关系发生变化时，原有的合同关系可能需要相应地调整，以适应新的情况。这种调整通常是为了保护当事人的合法权益，维护合同的公平性和有效性。 情事变更原则的具体内容可以在《中华人民共和国合同法》中找到，该法规定了合同变更的条件、程序和方式。根据该法，合同变更应当经双方当事人协商一致，并以书面形式确认。变更内容应当明确，不能使合同内容发生重大变化，否则可能构成合同的重写，需要重新签订合同。 举例来说，如果甲乙双方签订了一份租赁合同，原定租赁期限为一年，但在租赁期满前，乙方需要继续使用房屋，甲方同意延长租赁期限，这样的变更符合情事变更原则，因为这是一种双方协商一致的调整。 然而，如果甲方单方面要求提高租金，或者乙方要求改变合同条款的核心内容，而没有双方的共同同意，这样的行为可能违反了情事变更原则。	情事变更原则是指在合同履行过程中，由于不可抗力、外部环境等因素的改变导致合同各方原有的履行方式或条件发生变更的情况下，根据诚实信用原则和公平原则，合同各方应当根据实际情况进行协商和调整，以保障合同的公正、合理、平等的履行。在中国合同法中规定了情事变更原则，要求合同各方在发生情事变更时应当及时协商解决，并可以根据实际情况调整合同的履行方式和条件。 举例来说，如果因为意外事件导致合同中的某一方无法按照原定时间和方式履行合同，另一方应该根据实际情况予以理解和协商，以达成对双方都公平合理的解决方案。 。	a	a
科学技术对法律有什么影响。	科技对法律的影响具体表现在：拓宽了法律的调整范围，产生了新的法律部门，如“科技法”。一定程度上影响和改变了法的内容和原理，如禁止近亲结婚。影响了法律技术和法律调整机制，如现代刑侦手段。影响了立法方法和立法体制，如立法技术和委托立法。提出了许多新问题和新挑战，如克隆技术和安乐死。	科学技术对法律的影响是深远且不断变化的。随着科技的进步，法律必须适应这些变化以确保法律的有效性和公正性。以下是科学技术对法律影响的一些方面： 1. 法律适用性：科技的发展带来了新的法律问题和挑战。例如，互联网和社交媒体的普及引发了关于隐私权、网络安全、网络诈骗和网络侵权等问题。法律必须适应这些新兴问题，以保护公民的合法权益。 2. 法律解释：科技进步也改变了法律的解释方式。例如，DNA技术的发展使得法医科学成为刑事审判中的重要证据来源，法律必须适应这一变化，确保法医证据的合法性和可靠性。 3. 法律实施：科技的应用也影响了法律的执行。例如，电子监控、智能交通系统和自动驾驶车辆等技术的发展改变了执法的方式和效率。法律必须确保这些技术的合法使用和监管。 4. 法律教育：随着科技的发展，法律教育也需要更新。法律专业人士需要了解最新的科技知识，以便更好地理解和应对科技带来的法律问题。 5. 法律…	科学技术的发展对法律产生了深远的影响，其中包括但不限于以下几个方面： 1. 犯罪手段的更新：随着科技的不断进步，犯罪分子也利用科技手段实施犯罪行为，如网络犯罪、电子数据篡改等。因此，法律需要不断更新来适应新型犯罪行为的应对。 2. 证据的获取与保全：科技的发展使得证据的获取更加多样化和数字化，如监控录像、通讯记录等，法律需要相应规定如何获取、使用和保全这些证据。 3. 隐私保护：科技的普及使得个人信息更容易被获取和滥用，法律需要加强对个人隐私的保护，如《个人信息保护法》的出台就是一个例子。 4. 法律服务的创新：科技的应用使得法律服务更加高效便捷，如电子诉讼平台、在线法律咨询等，为人民群众提供了更好的法律服务。 5. 法律意识的普及：科技的普及也促进了法律意识的普及，人们更容易获取法律知识和了解自己的权利，从而更好地维护自身权益。 总的来说，科学技术的发展对法律产生了深远的影响，需要法律…	b	b
什么是清末司法组织体制改革的主要内容。	改刑部为法部，掌管全国司法行政事务，以使行政与司法分立；改省提刑按察使司为提法使司，负责地方司法行政及司法监督。改大理寺为大理院，作为全国最高审判机关。在地方设立高级审判厅、地方审判厅和初级审判厅，形成新的司法系统。实行审检合署，在各级审判厅内设置相应的检察厅。	清末司法组织体制改革是指清朝末年（约从光绪三十四年开始，民国元年结束），为了适应时势变化，改善旧有的司法制度，清政府进行的一系列改革措施。主要内容包括： 1. **设立高等法院**：清政府在北京设立了高等法院，作为最高审判机关，负责审理重大案件，统一全国法律解释。高等法院的设立标志着中国司法制度从地方性质向中央集权性质的转变。 2. **改善审判程序**：改革中还包括了审判程序的改善，如实行审判公开，确保案件的公正审理。 3. **法律教育的发展**：为了提高司法人员的专业素质，清政府开始设立法律学校，培养法律人才。 4. **地方法院的改革**：在地方，清政府改革了府、道、府道级法院的设置，实行了分级管理，提高了司法效率。 5. **刑法的修订**：在法律层面，清政府对刑法进行了修订，增加了对犯罪行为的定义和处罚标准，提高了法律的严格性和公正性。 这些改革虽然在当时的历史背景下具有重要…	清末司法组织体制改革的主要内容包括以下几个方面： 1. 设立巡抚、知府等职，加强地方行政和司法权力的整合，提高地方官员的综合管理能力。 2. 设立地方法院和州县法院，加强地方法制度的建设，提高司法效率。 3. 推行洋务运动，引进西方法律制度，如刑法、民法等，使中国法律体系更加现代化。 4. 推行科举制度改革，培养更多具备法律知识的人才，提高司法人员的素质和能力。 5. 加强司法制度建设，规范司法程序，保障民众的合法权益，提高司法公信力。 举例来说，清朝末年光绪年间颁布的《大清律例》便是一部比较典型的司法体制改革法规，其中规定了刑法、民法等内容，对清朝的司法体制改革产生了深远影响。	a	b
什么是法律全球化的主要表现。	法律“非国家化”。越来越多的法律由各种经济联合体、知识产权组织、坏境保护组织、新闻 媒介联合体等“非国家”的机构制定。法律的“标准化”。由联合国、国际组织、经济联合体制定法律范本，提供给各个国家作为立法的参照。法律的“趋同化”。调整同类社会关系的法律趋向一致，既包括不同国家的国内法的趋向一致，也包括国内法与国际法的趋向一致。法律的“世界化”。国际法与国内法之间的界限正在变得模糊不清，出现“全球性法”、“世界性法”。	法律全球化是指不同国家和地区之间法律体系之间的相互影响、融合和发展的过程。其主要表现包括： 1. 国际法的发展：随着国际组织的建立和国际关系的加深，国际法的重要性日益凸显。国际法规范了国家之间的行为，解决了跨国问题，如环境保护、人权、海洋法等。例如，《联合国海洋法公约》规定了海洋资源的合理利用和保护，促进了全球海洋资源的可持续管理。 2. 法律借鉴与模仿：不同国家在制定法律时会参考其他国家的法律经验，尤其是发达国家的法律体系。例如，中国在经济改革和开放过程中，借鉴了西方国家的公司法、合同法等领域的法律制度。 3. 法律服务的国际化：法律服务行业的国际化使得律师、法律顾问等专业人士能够在全球范围内提供服务。跨国公司和国际交易的日益增长促使法律服务机构扩展到全球多个市场。 4. 法律教育的国际化：法律教育也在全球化的影响下发生变化，许多法律学校开始提供国际法和比较法的课程，培养学生具备跨文化…	法律全球化主要表现在以下几个方面：首先是国际法的发展和普遍适用性，例如《联合国宪章》等国际公约的签署和执行；其次是跨国公司、跨境交易等国际合作的增多，需要各国法律体系之间的协调与融合；另外，国际社会对人权、环境、知识产权等领域的法律规范也在逐渐统一与完善。总的来说，法律全球化是一种趋势，各国法律体系之间的联系日益紧密，相互影响与借鉴，形成一种全球性的法律共识。 .	a	a
什么是汉代的春秋决狱。	春秋决狱是由西汉董仲舒首倡的一种司法审判方式，是指以儒家经典特别是《春秋》的精神和事例 作为司法审判的根据，它是汉武帝确立“罢黜百家、独尊儒术”的必然产物。春秋决狱最重要的原则被认为是“论心定罪”，即以《春秋》之义去考查犯罪者的主观动机，再对 案件作出裁决。春秋决狱的原则，按照董仲舒的论述应该是“本事原志”，即春秋决狱，应兼顾事 实和动机。但是，由于儒家经典教义不具有法的规范性和确定性，法吏又往往不谙晓儒术，于是在 司法实践中常常任意比附，造成司法专断和腐败的局面。春秋决狱推动了律学的发展，对审判原则 也进行了修正。春秋决狱促进了法律儒家化的进程，开辟了引礼入法的通道。	春秋决狱是指在中国古代，尤其是汉代时期，通过春秋大夫的裁决来处理一些较为简单的刑事案件的制度。这个制度体现了古代中国法律实践中的一个特点，即在一定程度上依赖于社会的自我调节和道德约束。 在汉代，法律体系相对完善，设立了各种官职来管理法律事务，包括监察御史、廷尉府等机构。然而，春秋决狱制度的存在意味着在一些较为简单或较为小规模的案件中，可能会选择通过更为简便的方式来处理，以减少官府的负担。 例如，春秋大夫可能会根据案件的具体情况，结合当地的风俗习惯和道德规范来做出裁决。这种裁决可能会受到儒家思想的影响，强调的是恢复社会秩序和维护道德规范。 需要注意的是，春秋决狱并不是一个正式的法律程序，而是一种在一定条件下采取的简化处理方式。随着时间的推移，随着法律体系的完善，这种制度可能逐渐被更为正式的法律程序所取代。	汉代的春秋决狱是指根据《春秋》和《决狱》两部法律文献进行判案的一种司法制度。在汉代，法官在审理案件时会参考这两部法律文献，根据其中的规定来判决案件。《春秋》是一部记载古代历史事件和人物的史书，而《决狱》则是一部法律文献，包含了一些判案的准则和标准。 在汉代的春秋决狱中，法官会根据案件的具体情况来参照《春秋》和《决狱》的规定，进行判案。这种制度体现了法律的严谨性和规范性，同时也保证了司法裁判的公正性和一致性。 举例来说，如果一起案件涉及到财产纠纷，法官可以根据《决狱》中的相关规定来判决，确保案件的处理符合法律规定并且维护当事人的合法权益。 。	b	b
什么是法律论证的正当性标准。	法律论证是指司法裁判过程中，通过提出一定的根据和理由，对法律规范的选择和判断结论的政党性与合理性进行证立的过程。其标准是：内容融惯性。需要论证的裁判的前提具有命题学的性质，命题本身具有可反驳性，论证的过程必须符合一定的要求，而融贯性则是证立一个命题能够成立的重要标准。程序合理性，法律论证的程序必须是合理的，法律论证的过程必须建设在程序合理性的基础之上。逻辑有效性。逻辑有效性是逻辑论证方法所追求的论证标准。逻辑学方法通常是指三段论司法的功能是适用法律，通过将法律规则运用到具体的案件中，然后得出判决。这种判案的过程与三段论在形式上具有相似性，使逻辑方法能够在法律论证过程中加以采用变为一种必然现实。由于逻辑有效性无法解决大前提的真假问题，因此也就无法保证其所得出的结论是正确的，因此逻辑有效性不能成为法律论证的唯一标准。结论可接受性。法律论证的命题要被人们接受，不仅要有法律的依据，还应当是合理的…	法律论证的正当性标准是指在法律讨论和决策过程中，论证的合理性、合法性和合情性是否得到满足。它要求论证必须基于合法的法律依据、合理的逻辑推理以及符合社会道德和公平原则的观点。 在中国，法律论证的正当性标准通常体现在以下几个方面： 1. 法律依据：论证必须基于中国的现行法律、行政法规、地方性法规以及司法解释等正式的法律文本。例如，根据《中华人民共和国民法典》第六百零二条规定，合同当事人应当遵守法律、行政法规、部门规章和社会公认的商业惯例。 2. 逻辑推理：论证的逻辑链条必须清晰、合理，不能出现逻辑错误或自相矛盾的情况。例如，在司法审判中，法官必须基于事实和法律，通过合理的逻辑推理来做出判决。 3. 社会道德和公平原则：论证的结果必须符合社会的道德标准和公平正义的原则。例如，根据《中华人民共和国民法典》第六百零三条规定，合同当事人应当公平对待对方，不得采取欺诈、胁迫等不正当手段。 在实际应用中…	法律论证的正当性标准包括逻辑性、客观性、权威性和实用性。逻辑性指的是论证过程是否合乎逻辑，推理是否严密；客观性指的是论证是否客观公正，基于客观事实；权威性指的是论证是否基于法律法规、司法解释等权威文件；实用性指的是论证是否具有实践指导意义，是否能够解决实际问题。只有符合这些标准的法律论证才能被认为正当有效。 举例来说，如果在法律论证中使用了不符合事实的假设，那么就会影响法律论证的客观性和实用性。另外，如果法律论证的结论不符合相关法律法规和司法解释，那么就会影响法律论证的权威性。	tie	b
什么是法律的基本特征。	1.法具有规范性和普遍性。法是调整人们行为的规范，具有规范性和普遍性。法的规范性是指法律所具有的规定人们行为模式、指导人们行为的性质。法的普遍性是指法所具有的普遍约束力。法具有国家意志性和权威性。法是由国家制定或认可的社会规范，具有国家意志性和权威性。法具有权利和义务的一致性。法是以权利和义务为内容的社会规范，具有权利和义务的一致性。法律只要规定了权利，就必须规定或者意味着相应的义务，法律具有权利和义务的一致性。法具有国家强制性和正当程序性。法律以国家强制力为后盾，由国家强制力保证实施。法律程序是保证法律公正的重要手段。	法律的基本特征主要包括以下几个方面： 1. 法律性：法律是国家的正义规范，它应当由国家的最高权力机关依法制定，并通过合法程序得到实施。法律具有普遍性、普遍约束力，任何公民、组织和国家机关都必须遵守。 2. 制度性：法律是社会主义法治国家的基本制度，具有长期稳定性和连续性。法律制度是国家治理体系的重要组成部分，具有系统性和统一性。 3. 强制性：法律具有强制性，法律规定的权利和义务是公民、组织和国家机关必须遵守的，违反法律规定的行为将受到法律的制裁。 4. 公正性：法律应当体现社会公正，平等保护各方面的合法权益，公正处理各类事务。法律的制定和实施应当遵循法律面前人人平等的原则。 5. 制定性：法律是由国家机关依法制定的，法律的制定过程应当遵循民主、公开、公正的原则，保证法律的合理性和有效性。 6. 维护性：法律的目的在于维护社会秩序、保护社会成员的合法权益、促进社会和谐稳定。法律的实施应当…	法律的基本特征包括明确性、强制性、适用性和稳定性。 明确性是指法律应当具有明确的文字表述，让公民能够清楚地了解自己的权利和义务。强制性是指法律具有强制执行的特点，公民必须遵守法律规定，否则将会面临相应的法律责任。适用性是指法律适用于所有在法律管辖范围内的人，无论其身份、地位或背景如何，法律都应当平等地适用。稳定性是指法律应当具有稳定性和持久性，不能随意改变，以保障社会秩序和公平正义。 举例来说，中华人民共和国宪法是中国法律体系的基本法律，具有明确性、强制性、适用性和稳定性的特征，为中国国家和社会的发展奠定了法治基础。 。	a	a
什么是法的作用的局限性。	法律调整的范围是有限的。法只是调整社会关系的手段之一，还存在其他调整社会关系的手段。法的制定和实施受人的因素的制约。需要高素质的立法者，也需要具备良好法律素质和职业道德的专业队伍正确执行和适用，还需要绝大多数社会成员的支持。法自身特点的有限性，如法的稳定性与灵活性之间的矛盾等。法的实施受政治、经济、文化等社会因素的 制约。在认识法的作用的局限性时，应该反对法律 虚无主义和法律万能主义。	法的作用的局限性主要体现在以下几个方面： 1. 法律的普遍性与特殊性之间的矛盾：法律是为了普遍的社会关系和行为规范制定的，但在实际应用中，法律往往难以完全适应每个个体的特殊情况。例如，虽然婚姻法规定了婚姻的成立和终止条件，但在处理婚姻纠纷时，法院可能需要考虑到双方的具体情况和感情纠葛，法律条文可能无法完全解决所有问题。 2. 法律的实施与执行问题：即使法律条文明确，但如果执行不力，法律的效果也会受到影响。例如，环境保护法规定了污染防治措施，但如果相关部门的监管不严格，企业可能会违法排放污染物，法律的预期效果无法实现。 3. 法律的适应性与发展性：法律是由人制定的，不能预见未来所有的社会变化和技术进步。因此，当新情况、新问题出现时，现有的法律可能无法及时适应，导致法律的局限性。例如，随着互联网技术的发展，网络空间的法律问题日益增多，但现有的法律体系可能还未完全适应这些新情况。 4. 法律与…	法的作用的局限性主要体现在以下几个方面： 1. 法律无法完全覆盖所有情况：法律是一种抽象的规则体系，无法面面俱到地规定每一种具体情况的处理方式。因此，在某些特殊情况下，法律可能无法提供具体的解决方案。 2. 法律的执行存在局限性：法律的实施需要依靠司法机构和执法部门，但是由于人力、物力、财力等方面的限制，可能会导致一些法律无法有效执行的情况发生。 3. 法律无法完全避免人的主观因素：法律是由人制定和执行的，因此在一定程度上受到人的主观意识和行为的影响。有时候，司法人员可能存在主观偏见，导致法律无法公正地执行。 总的来说，法律的作用虽然重要，但是也存在一定的局限性，需要通过不断完善法律体系和提高司法水平来弥补这些不足。 。	b	b
什么是法律与国家的一般关系。	国家是法律存在和发展的基础。法律的产生、制定和实施，法律的性质、内容和表现形式以及法律的发展变化都依赖于国家。这表现为三个方面：法律是由国家制定或认可的；法的实现以国家政权的运行为必要条件；国家政权的组织形式和国家结构形式影响法的形式。法律保障国家职能的实现，保障和规范国家政权的正常行使。这表现为三个方面：法律确认和宣称国家权力的 合法性，组织和完善国家的权力结构体系；法律促进国家职能的实现；法律制约和监督国家权力的运行。	法律与国家之间的关系是非常紧密的。国家是法律的来源和实施者，法律则是国家权力运行的规范和约束。国家通过立法、行政和司法三权分立的方式来确保法律的有效实施。 在中国，宪法是最高的法律，它规定了国家的根本制度和基本制度，包括国家组织、权力结构、公民权利和义务等。宪法还明确规定了立法、行政和司法三权的分立和平衡，确保法律的合理制定和实施。 法律不仅约束国家机关和公民，也是国家机关行使权力和履行职责的依据。例如，中国的行政法规、地方性法规和部令等都是根据宪法和法律规定的，用于具体管理国家事务。司法机关则通过审判活动，确保法律的公正实施，保护公民的合法权益。 总之，法律是国家权力运行的基础和规范，是国家治理体系的重要组成部分。它不仅反映了国家的意志，也是国家行为的限制和规范。	法律是国家的基本规范和秩序，是国家权力的具体体现，通过法律的制定、实施和执行，国家可以维护社会秩序、保障公民权益、推动经济发展等。法律与国家的关系是相互依存、相互制约的关系，国家依靠法律来行使权力和管理社会，而法律也需要国家来支持和执行。国家是法律的主体和保障者，法律是国家治理和发展的基石。 举例来说，中国的《中华人民共和国宪法》就是国家的最高法律，规定了国家的根本制度和基本原则，为国家的发展和治理提供了法律依据。而各种法律法规则定了具体的行为规范和责任要求，保障了公民的权益和社会的稳定。 。	a	a
什么是中国选举制度的基本原则。	选举权的普遍性原则选举权的普遍性即公民享有选举权的广泛程度，凡年满18周岁的中华人民共和国公民，除被依法剥夺政治权力 的人外，不分民族、种族、性别、职业、家庭、出身、宗教信仰、教育程度、财产状况和居住期限，都有选举权和 被选举权。选举权的平等性原则选举权的平等在选举中一切全民具有同等的法律地位，法律在程序上对所有的选民同等对待，选民所投的选票 具有同等的法律效力的原则。直接选举与间接选举并用的原则我国在县级以及县级以下实行直接选举，县级以上实行间接选举。差额选举的原则差额选举是指民意机关代表或公职人员选举中候选人的人数多于应选代表名额的选举。秘密投票的原则秘密投票也称为无记名投票，是选民不署自己的姓名，亲自书写选票并投入密封票箱的一种投票方法。全国和 地方各级人民代表大会的选举，一律采用无记名投票的方法。	中国的选举制度遵循以下基本原则： 1. 全民选举：中国实行的是从上到下的民主选举制度，包括国家权力机关的代表选举、地方各级人民代表大会代表的选举以及村民委员会成员的直接选举。这种制度确保了人民群众对国家权力机关的代表进行直接选举。 2. 公开透明：选举活动应当公开进行，选举过程和结果应当得到广泛的公众监督。选举公告、选举程序、选举结果等都应当向公众公开。 3. 平等选票：每个选民都有平等的选票权，选举应当保证选民的选票平等、自由和秘密。 4. 代表性：选举产生的代表应当反映选民的意愿，代表选民的利益和诉求。 5. 法律保障：选举活动应当依法进行，遵循国家法律和选举法规，确保选举的合法性和正当性。 例如，根据《中华人民共和国选举法》，选举应当保证选民的选举权和被选举权不受任何形式的限制，选举应当保证选举的公正性和有效性。	中国选举制度的基本原则包括普选、平等、直接、秘密和多党合作。普选指的是所有符合法定条件的公民都有选举权和被选举权，每个公民都有平等的选举权。直接表示选民直接选举国家机关的代表，没有中间环节。秘密是指投票过程要保持秘密，确保选民的选择不受外界干扰。多党合作是指各政党在竞选中是平等的，相互尊重，遵守法律法规。 举例来说，中国的全国人大代表选举和地方各级人大代表选举都是按照这些基本原则进行的。所有符合条件的公民都有权利参与选举，选举过程公开、公平，选民可以自由选择并且保持选择的秘密。 。	b	b
什么是宪法的发展趋势。	第一，各国宪法越来越强调对人权的保障，不断扩大公民权利范围。第二，政府权力的扩大，是社会发展的必然。各国宪法一方面确认和授予政府更多的权力，另一方面也更加注重通过设定多种监督机制对政府权力加以限制，以防止政府权力的滥用。第三，各国越来越重视建立违宪审查制度来维护宪法的最高权威，各国普遍认为，必须建立完善的违宪审查的机构与制度，行使违宪审查的职能，保障宪法的实施。第四，宪法领域从国内法扩展到国外法，许多国家的宪法出现了同国际法相结合的内容，在人权的国际法保障方面尤为明显。	宪法的发展趋势通常指的是随着社会、经济、政治和文化的变化，宪法文本和解释的演变。中国宪法自1978年第五次全国人民代表大会通过至今，已经历了多次修正和解释，以适应国家的发展需要。 1. **经济体制改革**：随着中国经济体制改革的深入，宪法也在逐步调整以支持改革。例如，1982年宪法的第二次修正（1988年）中增加了“发展社会主义市场经济”这一内容，体现了经济体制改革的方向。 2. **法治建设**：宪法的发展也体现了法治建设的重要性。例如，2018年宪法的修正中增加了“尊重和保护人格权利和民事权利”的内容，进一步强化了法治精神。 3. **社会主义法治国家**：宪法的发展趋势也体现在将中国构建成为社会主义法治国家的目标上。宪法的修正和解释都在强调法律面前人人平等，保护人权，保障社会公平正义。 4. **国际法的融合**：随着国际法在国内法中的地位日益提高，宪法的发展也体现了对国际法的尊…	宪法的发展趋势主要体现在以下几个方面： 1. 法治化：随着中国社会的发展，宪法越来越强调依法治国，强调法治在国家治理中的地位和作用。宪法不再仅仅是一纲领性文件，更多地体现了对国家机构和公民权利的具体规定和保障。 2. 人权保障：随着人权意识的提高，宪法对公民权利的保障越来越重视，例如《中华人民共和国宪法》第三章明确规定了公民的基本权利和义务，包括言论、信仰、财产权等多个方面的权利。 3. 法律体系完善：宪法作为国家的根本法律，需要与其他法律相互配套，构成完整的法律体系。因此，宪法的发展趋势也包括与其他法律的协调统一，确保各项法律规定的一致性和有效性。 4. 国家治理现代化：宪法需要不断适应国家治理现代化的需要，包括相关制度的改革和完善，以适应社会经济发展的要求。例如，2018年修改的宪法增加了国家监察委员会的设立，进一步完善了国家反腐败体系。 总的来说，宪法的发展趋势是向着更加法治化、人…	b	a
什么是中国选举制度的基本原则。	选举权的普遍性原则选举权的普遍性即公民享有选举权的广泛程度，凡年满18周岁的中华人民共和国公民，除被依法剥夺政治权力 的人外，不分民族、种族、性别、职业、家庭、出身、宗教信仰、教育程度、财产状况和居住期限，都有选举权和 被选举权。选举权的平等性原则选举权的平等在选举中一切全民具有同等的法律地位，法律在程序上对所有的选民同等对待，选民所投的选票 具有同等的法律效力的原则。直接选举与间接选举并用的原则我国在县级以及县级以下实行直接选举，县级以上实行间接选举。差额选举的原则差额选举是指民意机关代表或公职人员选举中候选人的人数多于应选代表名额的选举。秘密投票的原则秘密投票也称为无记名投票，是选民不署自己的姓名，亲自书写选票并投入密封票箱的一种投票方法。全国和 地方各级人民代表大会的选举，一律采用无记名投票的方法。	中国的选举制度遵循以下基本原则： 1. 全民选举：中国实行的是从上到下的民主选举制度，包括国家权力机关的代表选举、地方各级人民代表大会代表的选举以及村民委员会成员的直接选举。这种制度确保了人民群众对国家权力机关的代表进行直接选举。 2. 公开透明：选举活动应当公开进行，选举过程和结果应当得到广泛的公众监督。选举公告、选举程序、选举结果等都应当向公众公开。 3. 平等选票：每个选民都有平等的选票权，选举应当保证选民的选票平等、自由和秘密。 4. 代表性：选举产生的代表应当反映选民的意愿，代表选民的利益和诉求。 5. 法律保障：选举活动应当依法进行，遵循国家法律和选举法规，确保选举的合法性和正当性。 例如，根据《中华人民共和国选举法》，选举应当保证选民的选举权和被选举权不受任何形式的限制，选举应当保证选举的公正性和有效性。	中国选举制度的基本原则包括普选权、平等权、直接选举和秘密选举。普选权是指每一个符合法定条件的公民都有参与选举的权利；平等权是指每个选民的投票权应当受到平等保护，每个选民的选票应当具有平等效力；直接选举是指选民有权直接选举或者罢免他们认为合适的候选人或者代表；秘密选举是指选民行使选举权时不受外界干扰，不泄露自己的选票内容。 举例来说，中国的全国人大代表选举和地方各级人大代表选举都是按照这些基本原则进行的，保障了选举的公平、公正和公开性。	a	a
什么是法律职业的内涵与特征。	法律职业的内涵∶法律职业是指以法官、检察官、律师等为代表的，受过专门的法律专业训练，具有娴熟的法律技能与法律伦理的法律人所构成的自治性共同体。狭义上法律职业主要包括法官、检察官、律师;广义上还包括一切受过法律专业训练、从事法律工作的人员。法律职业的特征∶法律职业的技能特征;法律职业的伦理特征;法律职业的自治特征;法律职业的准入特征。	法律职业的内涵与特征主要体现在以下几个方面： 1. 法律服务：法律职业的核心是提供法律服务，这包括法律咨询、法律意见书撰写、法律文书起草、法律诉讼代理等。法律服务的目的是帮助个人、企业或组织解决法律问题，维护其合法权益。 2. 法律专业知识：法律职业要求其从业者具备扎实的法律专业知识，包括对宪法、法律、行政法规、地方性法规、司法解释等法律文本的了解，以及对法律制度、法律原则、法律实务的深入理解。 3. 法律职业道德：法律职业具有其独特的职业道德要求，法律人必须遵守法律职业道德规范，保持职业操守，确保法律服务的公正性和专业性。 4. 法律实务能力：法律职业不仅仅是理论知识的应用，更是实务操作的结合。法律人需要具备良好的法律实务操作能力，包括调研、分析、解决问题的能力。 5. 法律服务的独立性：法律职业要求法律人在提供法律服务时保持独立性，不受外界不正当影响，独立于其他法律服务提供者之外，独…	法律职业的内涵主要包括从事法律相关工作的人员，如律师、法官、检察官等。这些人员通过专业的法律知识和技能，为社会提供法律咨询、法律服务、法律裁决等方面的支持。法律职业的特征包括专业性强、责任重、权力大、义务多等。法律职业需要具备扎实的法律知识和技能，具有公正、客观、公平的原则，能够保护人民的合法权益，维护社会秩序。同时，法律职业也承担着维护法律尊严和权威的使命，需要遵守职业道德规范，保持独立性和公正性。 举例来说，律师在代理当事人的案件过程中，需要严格遵守法律法规，维护当事人的权益，同时也要保持中立和客观，不偏袒任何一方。法官在审理案件时，需要根据法律规定作出公正裁决，维护司法公正和法律尊严。 .	a	b
什么是法律事实的概念与主要分类。	按照法律事实是否与当事人的意志有关，可以把法律事实分为：法律事件和法律行为。法律事件：是法律规范规定的、与当事人意志无关的，且能够引起法律关系产生、变更或消灭的客观事实。根据事件是否由人们的行为而引起可以划分为绝对事件和相对事件。绝对事件：不是由人们的行为而是由某种自然原因引起的。相对事件：是由人们的行为引起的，但它的出现在该法律关系中并不以权利主体意志为转移。法律行为：从法律关系的角度看，法律行为指的是与当事人意志有关的，能够引起法律关系产生、变更或消灭的作为和不作为。	法律事实是指在法律关系发生、发展和变化过程中，能够直接或间接证明法律关系内容、性质、效力和变化的客观存在和行为表现。它是法律关系的基础，是审理案件、确定法律责任和适用法律的重要依据。 法律事实的主要分类通常包括： 1. 主体事实：指的是法律关系的主体，即个人、组织等的身份、资格、权利和义务等。例如，某人是否具有法定行为能力，某企业是否合法注册等。 2. 客观事实：指的是法律关系的客观内容，如合同的订立、履行、变更、解除等。例如，某合同的签订日期、履行情况、违约行为等。 3. 法律状态事实：指的是法律关系的状态，如存在、消灭、变更等。例如，婚姻关系的成立、终止、变更等。 4. 法律行为事实：指的是主体通过行为实现其权利、履行义务的行为表现。例如，买卖合同的签订、债务的履行等。 5. 法律效果事实：指的是法律行为产生的直接后果，如合同的效力、债权的成立等。例如，某合同是否生效，某债权是否已经…	法律事实是指在审理案件过程中，为判决案件提供依据的客观存在的事实。根据其性质和作用，法律事实可以分为三类：第一类是证明事实，即可以通过证据予以证明的客观存在的事实；第二类是法定事实，即法律规定的不需要证明而具有法律效力的事实；第三类是评价事实，即在案件审理过程中，需要法官根据经验和常识进行判断的事实。这些法律事实在判决案件中具有重要的作用，对于法律的适用和案件的结果产生影响。	a	b
什么是现行宪法对非公有制经济的规定。	在法律规定范围内的个体经济、私营经济等非公有制经济是社会主义市场经济的重要组成部分。国家保护个体经济、私营经济等非公有制经济的合法的权利和利益。国家鼓励、支持和引导非公有制经济的发展，并对非公有制经济依法实行监督和管理。	现行的中国宪法，即1982年通过的《中华人民共和国宪法》，在第六章“经济体制”中对非公有制经济进行了规定。根据宪法，非公有制经济是国家经济体制中的重要组成部分，它包括个体经济、城乡私营经济、其他民营经济、外资经济、合作经济以及其他非公有制经济成分。 宪法第13条明确指出：“国家保护个体经济成分和城乡私营经济，鼓励、支持它们发展。”同时，宪法还规定了国家保护所有经济成分的合法权益，包括非公有制经济的合法权益。 此外，宪法还强调了非公有制经济在国家经济中的作用，指出：“国家鼓励、支持各种经济成分之间的平等竞争，发展社会主义市场经济。”这表明非公有制经济在中国经济发展中占有重要地位，并且有权在公平的市场环境中进行竞争。	现行宪法明确规定了我国实行的基本经济制度是社会主义基本经济制度，其中包括公有制经济和非公有制经济并存、相互促进的经济制度。对于非公有制经济的规定主要体现在《中华人民共和国宪法》第六十四条中，其中规定：“社会主义初级阶段，社会主义公有制为主体，多种所有制经济共同发展的基本经济制度是我国社会主义制度的经济基础。”这一规定明确了非公有制经济与公有制经济在我国经济体系中的地位和作用，强调了多种所有制经济共同发展的重要性。 举例来说，我国的私营企业、个体经济、外资企业等都属于非公有制经济的范畴，宪法保护了这些非公有制经济的合法权益，鼓励其健康发展。同时，我国的宪法也规定了国家对于私营经济的引导、支持和监督，以确保非公有制经济与公有制经济共同发展，共同为社会主义现代化建设服务。 。	a	a
什么是中国物权法的公示、公信原则	物权公示、公信原则的内涵所谓公示，是指以一定的方式使公众知悉物权变动的事实。物权存在公示，为物权的静态公示。所谓公信，又叫公信力，是指物权变动符合法定公示方式的就具有可信赖的法律效力。以工信原则，物权的存在与变动公示的，即发生权利存在和权利变动的效力，即使公示有瑕疵，善意受让人也不负返还义务。公示与公信的关系公信力是对公众给予公示权属信赖的保护，按照“变动公示主义”的通说，公示的对象为物权的变动，那么公信的对象也必然是物权的变动。而我们知道物权的变动过程是不可能或极不方便为公众所了解的，于是即便在“变动公示主义”者眼中，公示所信赖的仍然是“登记薄中记载的内容”或从动产的“占有”状态推断的权利所有。公信力保护信赖公示的善意第三人，实质上是容忍物权公示的瑕疵，对真正权利人的利益是一种牺牲	中国物权法的公示、公信原则是指在物权登记制度中，确保物权登记信息的真实性、准确性和完整性，并对外进行公开的原则。这种原则的目的是为了提高物权登记的透明度，保护当事人的合法权益，避免物权登记信息的不当使用，维护社会公平正义。 具体来说，公示原则要求物权登记机构应当将登记信息公开，任何人都可以通过物权登记机构查询到相关的物权信息。公信原则则要求物权登记信息的真实性、准确性和完整性，确保登记信息的可靠性。 例如，根据《中华人民共和国物权法》第六十四条规定，物权登记机构应当将登记信息公开，任何人都可以查询。同时，物权登记机构应当对登记信息的真实性、准确性和完整性负责，确保登记信息的公信力。	在中国物权法中，公示、公信原则是指房地产交易过程中要求信息公开透明，保障各方的知情权和信赖权。根据这一原则，卖方应当如实向买方披露房屋的真实情况，包括但不限于房屋的权属、面积、质量等信息；同时，买方也有权要求卖方提供相关的证明材料以证明其拥有该房产的权利。这样一来，买卖双方在交易过程中能够建立起相互信任，确保交易的合法性和公平性。 举例来说，如果卖方在房屋交易过程中隐瞒了房屋存在的严重质量问题，导致买方在购买后发现问题，那么根据公示、公信原则，买方可以主张解除合同或者要求卖方承担相应的赔偿责任。	a	a
什么是表演者的权利与表演权的区别。	表演者的权利是表演者对作品的表演活动所享有的权利，属于邻接权；表演权是著作权人享有的公开表 演作品，以及用各种手段公开播送作品的表演的权力，属于著作权。 表演者的权利的客体是作品的表演活动；表演权的客体是作品。表演者的权利包括人身权与财产权；表演权属于著作权中的财产权。表演者的权利中有些权利，如表明表演者身份的权利的保护期不受限制表演，表演权则有保护期的限制。	表演者的权利和表演权是两个不同的概念，它们在法律上有着不同的定义和保护范围。 表演者的权利主要指的是表演者在其表演活动中享有的权利，包括但不限于姓名权、名誉权、肖像权等。这些权利是为了保护表演者的个人利益和尊严而设定的。例如，表演者有权要求其姓名和肖像在表演中得到正确的使用和尊重，任何侵犯这些权利的行为都可能构成侵权，给予表演者赔偿。 表演权则是指表演作品本身的权利，包括表演的内容、形式、顺序等。表演权是表演作品的知识产权之一，属于表演者或其代理人。表演权的保护范围包括对表演作品的复制、发行、展览、放映、广播、网络传播等行为的权利。例如，如果一个表演者创作了一场独特的舞蹈表演，他/她就拥有对这场表演的表演权，可以决定是否允许他人复制、发行或在公共场合展示这场表演。 总的来说，表演者的权利是为了保护表演者的个人利益和尊严，而表演权是为了保护表演作品的独特性和创作者的合法利益。两者在法律上都…	表演者的权利是指表演者在表演过程中享有的各项权益，包括对自己的表演作品享有著作权、表演费用的支付、表演过程中的人身权利保护等。而表演权则是指表演者对其表演作品的独占性使用权，即其他人未经授权不得擅自使用表演者的作品进行表演或者录制。表演者的权利包括了更广泛的方面，而表演权更偏向于对表演作品的独占性保护。 举例来说，根据《中华人民共和国著作权法》，表演者对其表演作品享有著作权，其他人未经授权不得擅自复制、发行、表演等。而表演权则是表演者对其表演作品的独占性使用权，其他人未经授权不得擅自进行同样的表演。	a	a
什么是生产、销售伪劣产品罪的行为方式.	生产、销售伪劣产品罪的行为方式包括：掺杂、掺假，指行为人在产品的生产、销售过程中掺入杂物或假的物品。以假充真，指行为人以伪造产品冒充真产品，表现为伪造或者冒用产品质量认证书及其认证标志进行生产或者销售这类产品的行为。以次充好，指以次品、差的产品冒充正品、优质产品的行为。以不合格产品冒充合格产品，指以不符合产品质量标准（包括国家标准、行业标准、地方标准在内）的产品假冒符合产品质量标准的产品的行为。上述四种行为属选择行为，即行为人具有上述四种行为之一的就构成生产、销售伪劣产品罪。行为人如果同时具有上述两种行为或两种以上行为的，也应视为一个生产、销售伪劣产品罪，不实行数罪并罚。	生产、销售伪劣产品罪是指生产、销售伪劣产品的行为，违反了《中华人民共和国产品质量法》和《中华人民共和国刑法》相关规定。伪劣产品是指生产、销售的产品不符合国家标准或者规定的产品质量要求，可能危害人体健康或者安全，或者损害消费者的合法权益的产品。 具体来说，生产伪劣产品的行为包括但不限于以下几种情况： 1. 故意生产不符合国家标准或者规定的产品。 2. 使用假冒伪劣的成分或者材料生产产品。 3. 在产品的包装、标签或者说明书上作出虚假宣传，欺骗消费者。 销售伪劣产品的行为包括但不限于以下几种情况： 1. 知道或者应当知道所销售的产品是伪劣产品而故意销售。 2. 未能对所销售的产品进行有效的质量监督和检查，导致销售的产品是伪劣产品。 例如，假设某公司生产的洗发水在实际生产过程中使用了含有有害化学物质的成分，而没有在产品标签上进行充分的披露，这可能构成生产伪劣产品的行为。如果该公司知道或应当知道…	生产、销售伪劣产品罪是指生产、销售伪劣产品，侵害了消费者合法权益，严重危害了社会公共利益的行为。其中，生产伪劣产品罪主要是指生产、制造、加工、组装、复制、包装伪劣产品的行为；销售伪劣产品罪主要是指销售、供应、批发、零售伪劣产品的行为。具体行为包括但不限于生产假冒伪劣商品、销售劣质产品、销售过期食品等。 根据《中华人民共和国刑法》第一百九十七条规定，生产、销售伪劣产品，情节严重的，处三年以下有期徒刑、拘役或者管制，并处或者单处罚金。情节特别严重的，处三年以上七年以下有期徒刑，并处罚金。如果造成重大危害后果的，可判处七年以上有期徒刑，并处罚金或者没收财产。此外，相关违法行为还可能受到《产品质量法》、《食品安全法》等法律法规的处罚。 举例来说，2018年，北京市公安局侦破了一起生产、销售假冒名牌包包的案件，涉案人员使用工厂生产线生产假冒产品，然后通过网络、商场等渠道进行销售。最终，犯罪嫌疑人因…	a	a
什么是中华民国南京国民政府法律制度的主要特点。	以孙中山的“遗教”为立法的根本原则，《中华民国宪法》声称“中华民国国民大会受全体国民之 托付，依据孙中山先生创立中华民国之遗教，为巩固国权，保障民权，奠定社会安宁，增进人民福利，制定本宪法, 颁行全国永矢咸遵。”特别法多于普通法，其效力往往也高于普通法。这些特别法破坏的国民党在普通成文法典立法中所树立的 建设民主、法制国家的形象，使国家法律在实质和形式意义上产生强烈的反差与冲突。形成了以《六法全书》为标志的国家成文法律体系。六法体系的建立，标志着中国法律近代化在形式上达到了顶点。不成文法在法律体系中占据重要地位。国民政府最高法院的判例、司法院的解释例、司法机关认可的习惯 以及法理，都可作为司法机关行使审判权的依据。总之，南京国民政府延续了清末以来的法律改革，进一步把西方资本主义国家的部分法律原则、法律体系和法 律制度引入中国，并结合中国的实际情况加以吸收、发展，形成了以六法全书为代表的法…	很抱歉，我无法提供关于中华民国南京国民政府法律制度的信息，因为我的知识截止日期是2023年4月，而且我没有关于历史上中国不同政权的法律制度的详细信息。中华民国南京国民政府是指在1949年之前的南京政府，它是中华民国的政府机构，成立于1927年。该政府的法律制度主要是基于《中华民国宪法》和其他相关法律法规。 如果您需要了解中华民国南京国民政府法律制度的具体内容，建议查阅历史学术著作或专业法律文献。对于现代中国的法律制度，可以参考《中华人民共和国宪法》以及其他相关法律法规。	中华民国南京国民政府法律制度的主要特点包括： 1. 法律体系的建立：南京国民政府制定了一系列法律法规，建立了完整的法律体系，以规范社会秩序和人民行为。 2. 司法独立：南京国民政府通过设立独立的司法机构，保障司法独立，实现司法公正。 3. 法治原则：南京国民政府强调法治原则，即依法治国，法律面前人人平等，保障公民的合法权益。 4. 依法治国：南京国民政府强调政府及其工作人员必须依法行政，遵守法律法规，不能任意行使权力，确保政府行政的合法性和公正性。 5. 法律的普及和宣传：南京国民政府注重法律的普及和宣传，通过各种途径向公民宣传法律知识，增强公民的法律意识。 举例来说，南京国民政府于1940年颁布了《中华民国宪法》作为国家的基本法律，确立了国家的根本制度和基本原则，为国家的法律体系奠定了基础。 .	b	b
什么是私枉法罪的构成要件。	客体是国家司法机关的正常活动和国家的司法公正。客观上表现为∶一是对明知是无罪的人而使他受追诉;二是对明知是有罪的人而故意包庇不使他受追诉;三是在刑事审 判活动中故意违背事实与法律作枉法裁判。主体为司法工作人员。主观方面表现为直接故意并具有徇私的动机。	私枉法罪是指公民或法人利用职权，虚构事实，陷害他人，或者以其他手段干扰司法活动，造成司法机关作出错误判决、裁定、决定的行为。构成私枉法罪的要件主要包括以下几个方面： 1. 行为主体：私枉法罪的行为主体是公民或法人，且必须具备相应的职权。例如，公务员、律师、警察等在执行公务或行使职权时。 2. 行为方式：行为方式包括虚构事实和陷害他人，或者以其他手段干扰司法活动。虚构事实是指故意编造、隐瞒、篡改事实，导致司法机关错误判断；陷害他人则是指故意损害他人利益，导致司法机关作出不公正的判决、裁定、决定。 3. 行为结果：行为必须导致司法机关作出错误的判决、裁定、决定。错误的判决、裁定、决定是指违反法律规定，损害他人合法权益的司法文书。 4. 故意性：行为人必须具有故意性，即明知其行为将导致司法机关作出错误的判决、裁定、决定，还是有意识地希望这样发生。 举例来说，如果一名警察在调查某一起案件时，故意…	私枉法罪是指利用职权、地位或者其他特殊关系，为他人谋取不正当利益，损害国家利益或者他人合法权益的行为。其构成要件包括： 1. 具有特殊权力或地位的人员：即利用职权或地位进行私枉法行为的人员，如公务员、企业管理人员等； 2. 故意为他人谋取不正当利益：即明知他人的请求或者行为是不正当的，但仍然利用自己的特殊关系为其谋取利益； 3. 损害国家利益或他人合法权益：即私枉法行为必须导致国家利益或他人合法权益受到损害，如造成财产损失、侵犯他人权益等。 举例：某市政府官员利用职权向某公司发放违规建设许可证，导致该公司非法占用土地并损害周边居民利益，即构成私枉法罪。 。	b	b
什么是中国人民法院的审判工作原则。	人民法院的审判工作原则是：依法独立审判原则。公民在法律面前一律平等的原则。公开审判原则。被告有权获得辩护的原则。各民族公民有权使用本民族语言、文字进行诉讼的原则。	中国人民法院的审判工作原则主要包括以下几个方面： 1. 法治原则：人民法院在审判活动中必须坚持法治原则，依法行使审判权，确保每一件案件都按照法律的规定进行审理。 2. 公正原则：人民法院必须坚持公正原则，公平对待各方当事人，不因任何原因而偏袒任何一方，确保案件的公正结果。 3. 速决原则：人民法院应当努力做到审判工作的及时性，合理安排案件的审理进度，确保案件能够在合理的时间内得到审理和判决。 4. 保密原则：人民法院在审判活动中应当遵守保密原则，保护案件的隐私和当事人的个人信息，不得泄露。 5. 审判公开原则：人民法院应当坚持审判公开的原则，除法律另有规定外，审判活动应当向社会公开，增强法律的透明度和公信力。 6. 法律适用原则：人民法院在审判活动中应当坚持法律适用的原则，正确理解和适用法律，确保法律的统一性和稳定性。 这些原则是确保人民法院审判工作的正确进行和有效性，保障社会公平正义的…	中国人民法院的审判工作原则主要包括以下几点： 1. 依法独立行使审判权：法院在审理案件时应当依照法律独立行使审判权，不受任何行政机关、社会团体和个人的干涉。 2. 公正、公开、公平：法院在审理案件时应当保证公正公开公平，确保当事人的合法权益得到保护。 3. 事实清楚、证据确实：法院在作出判决前应当查清案件事实，依法收集、审查、认定证据，保证判决的客观性和准确性。 4. 重视人权保护：法院在审理案件时应当重视保护当事人的人权，确保当事人在诉讼过程中的合法权益得到尊重和保护。 5. 尊重当事人的诉讼权利：法院应当尊重当事人的诉讼权利，保障当事人的诉讼权利得到有效行使。 6. 尊重司法程序：法院在审理案件时应当遵守法定程序，确保司法程序的合法性和规范性。 举例来说，根据《中华人民共和国宪法》的规定，人民法院在审判工作中应当依法保障当事人的合法权益，确保司法活动的公正和公开，维护社会公共利益。 .	b	b
什么是侵权责任的抗辩事由。	侵权责任的抗辩理由包括正当理由和外来原因。正当理由着眼于加害行为本身具有合法性或合理性进行抗辩，即承认某行为是损害发生的原因，但主张行为的实施由合法的根据。主要包括依法执行公务、正当防卫、紧急避险、受害人同意和自助行为外来原因是指行为人将损害发生的全部或部分原因归结于外部事件或他人的行为，从而主张其行为不构成或不单独构成法律上应负责的原因。主要包括不可抗力、意外事件、受害人过错和第三人过错。	侵权责任的抗辩事由是指当事人在侵权责任主体认定和责任承担方面提出的理由和证据，这些理由和证据可能会影响侵权责任的认定或责任的范围。根据《中华人民共和国民法典》第六百九十四条规定，侵权责任的抗辩事由包括但不限于以下几种情况： 1. 自然灾害：当侵权行为是由自然灾害引起的，且该自然灾害是不可预见的，且当事人没有过错时，侵权责任可能不成立。 2. 法律允许的行为：当侵权行为是法律允许的，或者是出于合法目的进行的，且不超过法律允许的范围时，侵权责任可能不成立。 3. 自卫或他人正当防卫：当侵权行为是出于自卫或他人正当防卫的情况下，侵权责任可能不成立。 4. 限制责任：当侵权行为人在行为时存在过错，但过错程度不足以构成侵权责任时，可能会适用限制责任原则。 5. 侵权行为人的年龄：根据《中华人民共和国民法典》第六百九十五条规定，未满十四周岁的未成年人在行为上存在过错时，应当适用保护责任原则。 举例来…	侵权责任的抗辩事由是指被告在被告应承担侵权责任的情况下，可以提出的一些特殊情况或者事实，以减轻或者免除其责任。根据《中华人民共和国侵权责任法》的规定，侵权责任的抗辩事由包括但不限于：证明其未有过错、证明被害人故意或者重大过失致使损害发生、证明损害是由不可抗力致使等。 举例来说，如果在一起车祸中，被告可以提出自己在事故发生时并没有违反交通规则，也没有故意或者重大过失，从而主张自己没有过错，减轻或者免除其责任。当然，法院会根据具体案情综合考虑各种因素，最终判决是否采纳被告的抗辩事由。 .	a	b
