# Supplementary material
Source: ML conference proceedings conference paper supplement (https://openreview.net/forum?id=R7pR4dzgAV)
Supplement: supplementary_material [file meden.xlsx]

## Sheet: Sheet1
Question	Concise_Reference	model_answer_a	model_answer_b	model_answer_a vs model_answer_b	model_answer_a vs model_answer_b_new
试述刘河间“火热论”的学术思想	字守真，号通玄处士。著《素问玄机原病式》、《素问病机气宜保命集》等。六气化火说是刘完素火热论的核心学术观点，认为六气之中，风、湿、燥、寒四气在其致病过程中均可化生火热，而火热也是产生风、湿、燥、寒的根源。五志亦可化火生热。批判《局方》以降的滥用辛香燥热的流弊。主张用辛凉苦寒药，重视表热与里热，创防风通圣散、双解散、六一散等名方。	刘河间的“火热论”是中医学中的一种理论，它强调了人体内的“火热”因素在疾病发生发展中的重要作用。根据这一理论，人体内存在着一种名为“火”的虚实，它与人体的气血、津液等有着密切的关系。当“火热”过盛时，会导致气血失调，津液耗伤，从而引起一系列的病理变化。 刘河间认为，“火热”主要表现为内脏的热性质增强，导致体内气血运行失调，引起内伤病症。例如，肝火亢盛可能导致情绪失调、头痛、失眠等症状；心火旺盛则可能导致心烦、口渴、潮热等症状。因此，治疗时需要根据“火热”的具体表现，采取相应的调理措施，如清热解毒、泻火解毒等。 在中医药治疗中，刘河间的“火热论”对指导药物选择和方剂组成有着重要的指导意义。例如，使用清热解毒的药物如黄连、黄芩等来清除体内的火热，或者使用泻火解毒的药物如茯苓、泽泻等来调节津液平衡。	刘河间是明代著名的医学家，他提出了“火热论”。在他看来，人体有七情即喜、怒、忧、思、悲、恐、惊，这七情会导致心火亢盛，引起各种疾病。他认为内伤火热主要表现在五脏六腑，外感火热主要表现在表里关系，如热病、痈疽、疥疮等。刘河间认为，治疗火热病应当清热解毒，以清热泻火为主要疗法。他的“火热论”在中医学中有一定的影响。 举例来说，比如有人因为长期的愤怒导致心火亢盛，出现口干、口苦、睡眠不佳等症状，根据刘河间的理论，可以采用清热泄火的方法进行治疗，如龙胆泻肝汤等方剂来调理。	a	a
张介宾的阳非有余论是什么	张介宾从《内经》的记述与观察自然现象的角度出发，从形气、寒热、水火三个方面阐明了阳气对于生命活动的重要作用。“形气之辨”认为，由于阳化气，阴成形，故凡人之体温活力和五官五脏的功能活动，都是阳气的作用，及其死后，则身冷如冰，知觉尽失，形存而气去，这种“阳脱在前而阴留在后”的情况，正是阳常不足的结局。“寒热之辨”，从春夏阳热而生化万物，秋冬阴冷而缺乏生意，说明“热无伤而寒可畏”，以之论证阳气的重要性。“水火之辨”，认为水属阴而火属阳，凡水之所以产生，所以生物，所以化气，均有赖于阳气的作用，故说“生化之权，皆由阳气”，“得阳则生，失阳则死”。同时，就人体而言，形体之衰虽然是阴气亏虚的表现，但张氏进而认为阴气的生成和衰败都是以阳气的功能作用为主导，即“阴以阳为主”。因此，要想维持延续生命活动的存在，应时时注意保护阳气，不能任意耗伤，亦即阳气要时时虑其不足，不要虑其有余。这就形成了张介宾“阳非有余…	张介宾的《阳非有余论》是中国古代医书之一，作者为明代医家张介宾。该书主要论述了阴阳学说在医学中的应用，特别是关于阴阳平衡与疾病发生的关系。书中详细分析了阴阳的相对、相生、相克等规律，以及如何通过观察患者的体征来判断阴阳平衡与否，从而指导治疗。 在《阳非有余论》中，张介宾强调了“阳不胜阴，病将危篑”的观点，即当阳气被阴气压迫或抑制过多时，可能导致阳气虚弱，进而影响身体健康。因此，治疗时需要根据患者的具体情况，调整阴阳平衡，恢复阳气，以达到治疗目的。 例如，张介宾在书中提到，若患者出现面色苍白、四肢不温、口不渴等症状，可能是阴寒内盛，阳气不足的情况，此时可用温阳散寒的方法来治疗。 《阳非有余论》作为中医理论的重要组成部分，对后世中医的发展产生了深远的影响。它不仅为中医诊断和治疗提供了理论基础，也为后来的医家提供了研究阴阳平衡的重要参考。	张介宾的阳非有余论是指人体阳气过盛，导致阴阳失调，出现一系列症状的中医学理论。在《景岳全书》中，张介宾提出了“阳非有余”这一概念，认为阳气过盛是导致疾病的根本原因，需要通过调理阴阳平衡来治疗疾病。这一理论在中医临床实践中有着重要的指导意义，尤其在治疗病证中以热病、实证为主的情况下更为突出。 举例来说，如果患者出现口干口渴、大便干燥、舌红苔黄等症状，中医医生可能会根据张介宾的阳非有余论进行辨证施治，采用清热泻火、润燥滋阴的治疗方法来调理阳气过盛的情况。	a	a
吴又可论伤寒与温疫的鉴别具体内容是什么	吴又可认为温疫在病因、病机和辨证等方面均不同于一般外感病，且与伤寒有很大区别，应当很好加以区分。病因不同：温疫因感受天行疫疠之气所引起；而伤寒乃感受风寒等六淫邪气所致，或单衣风露，或冒雨入水，或临风脱衣，或当檐洗浴等。感邪途径不同：温疫自口鼻而入；伤寒自毫窍而入。发病情况不同：温疫感久而后发，淹缠二三日或渐加重，或淹缠五六日，忽然加重；伤寒则感而即发，感发甚暴。病变部位不同：温疫感邪多伏于募原；伤寒感邪在六经。传变情况不同：温疫传变从募原分传表里，传里内侵于腑，传表外淫于经；伤寒传变则自表及里，以经传经。初起症状不同：温疫初起，忽觉凛凛之后，但热而不恶寒；伤寒则发热恶寒并见。传染性不同：温疫能传染于人，伤寒一般不传染于人。治疗法则不同：温疫初起以疏利为主，先里后表，里通表和，下不嫌早；伤寒初起以发表为先，先表后里，先汗后下，下不嫌迟。预后有别：温疫发斑为外解；伤寒发斑为病笃。这样，吴氏首…	吴又可在其著作中提出了伤寒与温疫的鉴别要点，主要包括以下几个方面： 1. 发热的性质：伤寒的发热通常是缓慢上升的，且伴有寒战，患者往往感到身体冰冷；而温疫的发热则较为急骤，伴有热迫、潮红，患者感到热得难以忍受。 2. 病情的发展：伤寒的病情发展较为缓慢，患者可能会出现食欲不振、疲乏无力、头痛、肌肉疼痛等症状；温疫则病情发展较快，患者可能会出现高热、头痛、颈项强直、肌肉疼痛等症状。 3. 病因的考虑：伤寒多由细菌性痢疾杆菌引起，通常与饮食不洁、环境卫生差有关；温疫则多由风热邪侵袭，可能与季节变化、气候变化有关。 4. 体征的观察：伤寒患者可能会出现脉细弱、舌苔白腻等体征；温疫患者则可能出现脉浮数、舌红少苔等体征。 5. 辨证施治：根据伤寒与温疫的鉴别要点，中医治疗会有所不同。伤寒治疗可能侧重于清热解毒、养阴生津；温疫治疗则可能侧重于清热解表、宣肺止咳。	吴又可在《伤寒论》中提到了伤寒与温疫的鉴别方法。他认为，伤寒病初起时，除发热外，还会有恶寒、头痛、四肢酸痛等症状，而温疫病初起时则主要表现为高热、口渴、汗出等症状。此外，伤寒多由外感风寒引起，病情较缓，可以通过汗出解表的方法缓解症状；而温疫多由外感暑热引起，病情较急，应该及时清热解毒。因此，根据病情的表现和病因的不同，可以辨别出伤寒与温疫。 举例来说，如果一个患者出现了发热、恶寒、头痛、四肢酸痛等症状，且病情较为缓慢发展，那么可能是伤寒病；而如果一个患者出现了高热、口渴、汗出等症状，且病情急剧加重，那么可能是温疫病。	tie	tie
张子和的攻邪论包括有哪些内容？	邪气致病观：张氏论病首重邪气，认为人体之所以发病，乃是由于邪气侵犯的结果，强调因邪致病，论病重邪，邪留正伤，邪去正安，临床治疗力主祛邪。三邪理论：张氏认为天地各有六气，人有六味，该六气六味在失常的情况下都可能成为邪气，使人体的上中下三部发生病变，根据三邪造成发病的部位和症状各不相同，治疗上采用汗吐下三法分别治之。重视血气流通。人体在正常的生理情况下，血气本应是流通的，一旦患病便血气壅滞，而邪气侵犯是导致血气壅滞的根本原因。在治疗时提出以汗吐下三法祛邪为急，达到恢复血气流通的目的。攻病时注意正邪的比例，当邪气十去其七后，注意用食疗食补。	张子和的《攻邪论》是中国古代医书之一，主要内容涉及了治疗外感六淫邪气的方法和原则。书中详细阐述了如何根据患者的具体症状和体质，选择合适的治疗方法来攻克邪气。 具体来说，《攻邪论》包括了以下几个方面的内容： 1. **辨证施治**：张子和强调了辨证施治的重要性，指出治疗应根据患者的具体情况来定。例如，对于外感风寒，应用温药温阳；而外感风热，则应用清热解毒。 2. **脏腑经络的关系**：书中还详细讨论了脏腑与经络之间的关系，以及邪气侵犯脏腑经络的规律。例如，邪气侵犯肺，可能导致呼吸困难；邪气侵犯肝，可能导致头痛、眼花等症状。 3. **治疗方法**：《攻邪论》中还介绍了多种治疗方法，如用药、针灸、按摩等。例如，对于外感风寒，可能会用到麻黄、桂枝、甘草、桂、芍等药物来治疗。 4. **预防保健**：书中还提到了预防和保健的重要性，强调了保持身体健康的方法，如合理饮食、适量运动、保持良好的生活…	张子和的攻邪论主要包括以下内容： 1. 强调预防为主：张子和认为疾病的发生是由于外邪入侵体内，因此强调预防胜于治疗，提倡“先病不治”、“既病防治”等理念。 2. 强调攻邪：张子和认为疾病是由于邪气侵袭人体所致，因此治疗疾病必须攻邪。他主张通过药物、针灸、推拿等方式来驱除邪气，恢复人体的正常功能。 3. 强调因邪治邪：张子和主张用有相类似功能的药物或方法对抗邪气，例如用寒凉药物治热病、用温热药物治寒病等。 4. 强调辨证施治：张子和认为治疗疾病必须根据患者的具体病情、体质特点等进行辨证施治，不同病症需要采取不同的治疗方法。 总的来说，张子和的攻邪论强调预防为主，注重攻邪、辨证施治，是中医治疗疾病的重要理论之一。 。	b	b
李杲阐发脾胃生理功能与内伤热中证病理变化的主要内容	脾胃为元气之本。李杲认为脾胃的生理功能正常与否与人体元气的是否充盛具有非常密切的关系，而元气不足又常常是导致内伤病发生的主要原因。说明脾胃是元气之本，元气是健康之本，脾胃伤则元气衰，元气衰则疾病由此发生。脾胃为精气升降运动的枢纽。李杲认为人体精气的升降运动，有赖于脾胃居于其中以为枢纽，假使脾胃功能受到损伤，便将影响到精气的升降而出现两种不同的病变，或下泄而久不能升，或久升而不降，均会导致疾病的发生。不过，在升降的问题上，李杲特别强调生长和升发的一面。他认为只有脾胃之气升发，谷气上升，元气才能充沛，生机才能洋溢活跃，阴火才会戢敛潜藏；否则脾胃之气下陷，谷气不升，元气亏乏，生机不能活跃如常，阴火即可因之上冲而导致各种病变。治疗上，对于升发脾胃之气与潜降阴火，李杲认为二者之间是相反相成的关系。李杲内伤热中证的病理变化，主要是气火失调。他认为元气与阴火具有相互制约的关系。如果元气充沛，阴火自降敛…	李杲是中国古代著名的医学家，他在《脾胃论》中详细阐述了脾胃的生理功能以及内伤热中证病理变化的主要内容。首先，李杲认为脾胃是人体的根本，负责消化吸收和营养的生成。他强调脾胃的功能对于人体的健康至关重要。 在内伤热中证病理变化方面，李杲认为内伤热是由于脾胃功能失调导致的。这种情况可能是由于饮食不当、情绪波动、过度劳累等因素引起的。当脾胃功能失调时，可能会导致中焦（脾胃所在的部位）出现热象，如口渴、口苦、胸闷、腹胀等症状。 李杲还提出了治疗方法，包括调理脾胃、清热解毒。例如，他建议使用一些具有清热解毒作用的中药，如黄连、黄芩等，以及调和脾胃的药物，如茯苓、陈皮等。通过这些方法，可以帮助恢复脾胃的正常功能，缓解内伤热引起的症状。	李杲在《素问·脾胃论》中阐述了脾胃的生理功能包括运化水谷、吸收营养、输布精微等，脾主运化，胃主受纳。当脾胃功能失调时，就会引起内伤热中证的病理变化。内伤热中证主要表现为口干口渴、大便秘结、舌苔黄腻等症状，是由于内伤或外邪热邪侵袭脾胃而引起的病症。治疗内伤热中证的关键是调理脾胃功能，清热解毒，通利大便，保持体内阴阳平衡。 举例来说，如果一个人长期饮食不规律，导致脾胃功能受损，就容易出现内伤热中证的症状。针对这种情况，可以通过调整饮食结构，避免暴饮暴食，多吃易于消化的食物，同时可以配合中药治疗，如黄连、黄芩等清热解毒的药物，来改善脾胃功能，缓解内伤热中证的症状。	a	a
什么是朱丹溪“阳有余阴不足”的学术观点	这是朱丹溪的核心学术思想之一，是他对人体阴阳的基本观点。他通过对自然现象的观察与格物，发现天大地小、日大月小的规律，说明即是在生理状况下，也存在着阳有余、阴不足和气有余而血不足的情况。具体而言：人之阴阳动静，动多静少人之生长衰老，阴精难成易亏人之情欲无涯，相火易夺阴精因此在防治早衰时，宜注意清心寡欲、茹淡饮食，以免诱发相火妄动；平时注意保养阴血、阴精，慎动而主静。	朱丹溪是明代著名的中医医家，他在中医理论中提出了“阳有余阴不足”的学术观点。这个观点认为，人体的生命活动是由阴阳平衡状态来维持的。在这个观点中，阳代表的是身体的外在活动、生理功能和阳性的生命力，而阴则代表的是身体的内在潜藏、恢复和阴性的生命力。 朱丹溪认为，人体在正常情况下，阳和阴是相辅相成、相互依赖的。然而，他也指出，在某些情况下，阳的功能可能过于强盛，而阴的功能则相对不足。这种情况下，阳的过剩可能导致身体的外在活动过度，而阴的不足则可能导致身体的内在恢复功能受损。 例如，如果一个人在夏季外出工作时间较长，长时间暴露在阳光下，可能会导致阳气过旺，而阴气不足。这种情况下，可能会出现口渴、盗汗、心烦等症状。朱丹溪认为，治疗这种情况需要通过调节阴阳平衡，增强阴气，减轻阳气，以恢复身体的平衡状态。 朱丹溪的这一学术观点在中医理论中占有重要地位，至今仍被用来指导临床治疗和疾病预防。	朱丹溪认为“阳有余阴不足”是指人体阳气过盛，而阴气不足。这种情况在中医学中被认为是一种失衡状态，容易导致身体出现各种症状，比如口干、咽喉干燥、大便干燥等。朱丹溪强调调理阴阳平衡对于维持身体健康至关重要，通过中药调理、针灸或其他中医疗法来调整体内的阴阳平衡，以达到治疗疾病和强身健体的目的。 举例来说，如果一个人出现口干舌燥、心烦易怒、大便干燥等症状，中医会根据朱丹溪的观点认为这个人体内阳气过盛，阴气不足，需要通过药物或针灸来调理阴阳平衡，以达到治疗的效果。 。	b	a
庞安时的寒毒说的主要内容	庞氏指出广义伤寒的病因是寒毒，只不过由于感受邪气的时间、地点、地域和体质的不同，个体表现出狭义伤寒、中风、风温、温病、湿病、暑病等不同的证候。庞氏强调一切外感热病的共同病因都是“毒”，故外感中以“温毒”和“寒毒”为剧。（指出素体盛衰在发病中具有关键性作用。具体而言，人的禀气包含了素体与勇怯两个方面。而素体的寒热，又是“毒气从化”的决定因素。发病与四时气候、地域居处关系密切。	庞安时的寒毒说是中医学中的一种理论，主要是指寒邪和毒邪在人体内的相互作用及其对人体的影响。寒毒说认为，寒邪和毒邪在人体内的相互作用可以导致一系列的病理变化和疾病。 寒毒说认为，寒邪主要是由外界的寒冷环境、饮食过冷、情绪抑郁等因素引起的，它可以导致人体的阳气受损，导致气血运行不畅，导致寒邪内侵。寒邪内侵可以导致多种症状，如身体疼痛、关节炎痛、腹痛、便秘、食欲不振等。 毒邪则是指外界的有毒物质、病原体等进入人体，引起的毒性反应。毒邪可以通过食物、空气、水等途径进入人体，也可以通过外伤、感染等途径引起。毒邪在人体内可以导致气血运行不畅，导致一系列的病理变化，如发热、出疹、疼痛、消化不良等。 寒毒说认为，寒邪和毒邪在人体内的相互作用可以导致更严重的病理变化，如寒毒互结，寒毒相乘等。因此，中医治疗寒毒病症时，需要根据寒毒的具体情况，采取不同的治疗方法，如温阳散寒、清热解毒、活血化瘀等。	庞安时的寒毒主要指的是体内寒气过重所导致的病症。他认为寒气是一种阴邪，容易侵袭人体，导致寒症。寒症表现为体寒、畏寒、肢冷、腹痛、腹泻等症状，严重时还会影响脏腑功能，导致各种疾病。庞安时在《金匮要略》中提出了针对寒症的治疗方法，如温补、祛寒、理气等，以恢复体内的平衡状态。 举例来说，如果一个人常年受寒湿环境的影响，食用生冷食物过多，导致体内寒气过重，就容易引发寒症。针对这种情况，庞安时会建议通过温补的中药调理，避免寒邪的侵袭，以恢复身体的健康状态。	b	tie
王士雄对暑病的贡献	王孟英是温病大家，对六气中“暑”的研究有建树。他对历代医家对暑病的认识进行了归纳总结，旗帜鲜明地反对李东垣把“阴暑阳暑”的划分，认为“至暑乃天之热气，流金灼石，纯阳无阴。”他反对东垣“阳邪为热，阴邪为暑”的观点，指出暑与热皆为阳邪。对“暑必兼湿”的观点进行了质疑，指出暑“多”夹湿，但未必夹湿。暑同寒邪无可阳可阴之分，因为夏月寒湿之证不应当属于暑病。对暑病的治疗，与东垣的“清暑益气汤”义相迥，创制王氏“清暑益气汤”，以西洋参与西瓜翠衣为君药。	王士雄是中国古代著名的医家，他在《温病论》中对暑病的研究有着重要的贡献。王士雄认为，暑病是由于暑热侵袭人体所致，主要表现为发热、头痛、咳嗽、咽喉痛等症状。他提出了“温病一气化燥”的理论，认为暑病是由暑热直接作用于人体，导致体内气机失调，引起燥热内蕴，从而形成温病。 王士雄在治疗暑病方面，主张“先清后补”，即首先用清热解毒的方法治疗，待病情有所缓解后，再进行补益。例如，他会使用一些清热解毒的药物，如菊花、黄连等，并且强调饮食上要注意清淡，以减轻体内的热量负担。 王士雄的这些理论和治疗方法，对后世的温病学有着深远的影响，他的贡献至今仍被中医界所重视和学习。	王士雄是清代著名医学家，他在《伤寒杂病论》中对暑病的病因、病机、诊断和治疗等方面做出了重要贡献。他认为暑病的发生是由于热邪侵袭，导致人体阳气不固，阴邪内生，从而引发一系列症状。在治疗方面，他主张辨证施治，根据患者的具体情况采用不同的治疗方法，例如清热解毒、疏风清热、泻火透毒等。他还提出了一些辨证施治的经验，如重视脉象、舌象等诊断方法，以及运用中药调理患者的阴阳平衡。王士雄的贡献对于暑病的治疗和研究具有重要意义。	b	a
叶天士“久病入络”的学术观点	叶天士在其《临证指南医案》中说：“其初在经在气，其久入血入络。”久病入络的观点，是叶天士治疗疑难杂病和慢性病的重要方法之一。叶氏认为久病则气顿血滞，络脉痹阻，百病由生。叶氏认为通络之大法，以活血为要；同时强调以辛为治，或辛润，或辛温，或辛咸，或搜剔，常选用桃仁、归尾、归须、苏木、蒲黄、新绛、茺蔚等活血通络之品，或配伍虫蚁之类。叶氏此法受到后世医家的效仿与推崇。	叶天士是明代著名的中医医家，他在《幼幼集成》中提出了“久病入络”的学术观点。这个观点认为，长期的疾病会导致病变从表浅的经络深入体内的络脉，形成一种特殊的病理状态。这种状态下，疾病不仅仅局限于表面的症状，而是深入到了身体的络脉系统中，影响了身体的气血运行。 在叶天士的观点中，治疗久病入络的疾病需要通过调整脏腑功能，恢复气血平衡，逐步推陈出新，促进病邪排出体外。治疗方法通常包括调理脾胃、补益肝肾、活血化瘀等，以达到疏通经络、恢复正常生理功能的目的。 举个例子，如果一个人长期患有肝病，可能会导致肝脏功能受损，气血运行不畅，随着时间的推移，病变可能会影响到肝脏与其他脏腑之间的络脉，形成久病入络的状态。在这种情况下，治疗不仅仅是针对肝脏的治疗，还需要考虑到整体的脏腑功能，通过中药、针灸、按摩等方法来调整脏腑功能，促进气血的流通，以达到治疗的目的。	叶天士认为“久病入络”是指长期慢性病变导致经络阻塞，进而引发各种病症。他认为，人体的经络系统是疾病发生的重要通道，经络阻塞会导致气血不畅，从而影响器官功能，引发疾病。叶天士提出了“经络病变论”和“经络治疗法”，强调通过调理经络恢复气血畅通，以达到治疗疾病的目的。 举例来说，古代医学典籍《黄帝内经》中就有关于经络的记载，强调了经络在人体生理病理中的重要作用。许多中医治疗方法都是基于调理经络来实现疾病治疗的效果。	a	a
叶天士治疗中风病的学术特色	叶天士总结了清以前历代先贤对中风病的治法，如刘河间、李东垣、朱丹溪、薛立斋、缪仲醇等。提出“阳化内风”说，认为是“身中阳气之变动”所致；其病机或由于肾液少，水不涵木，虚风内动；或由于平昔怒劳忧思，五志气火交并于上，肝胆内风鼓动盘旋，上盛而下虚；或由于肝血肾液两枯，阳扰风旋；或由于中阳不足，阳明脉络空虚，内风暗动。叶氏提出滋阴熄风、镇阳熄风、和阳熄风、缓肝熄风、养血熄风、介类潜阳诸法，旨在调和阳气之变动，并指出“身中阳化内风，非发散可解，非沉寒可清”，临床认识十分深刻常选用的方剂有仲景的复脉汤、河间的地黄饮子、丹溪的虎潜丸、景岳的镇阴煎等，并多用介类、石类、养血、缓肝之品。	叶天士（1558-1610），字子高，号松雪，江苏常州人，是明代著名的医家，被誉为“后世医圣”。他在中风病的治疗上有着独到的学术特色，主要体现在以下几个方面： 1. 重视辨证施治：叶天士强调中风病的治疗应根据患者的具体情况进行辨证施治。他认为中风病的原因多种多样，包括内伤、外伤、气血失调等，因此治疗方法也应根据患者的具体病因和症状来定。例如，对于因内伤导致的中风，应侧重于调理内脏；而对于因外伤导致的中风，则应首先处理外伤伤情。 2. 强调温和治疗：叶天士主张中风病的治疗应温和而不应激烈。他认为过于激烈的治疗可能会加重病情，因此在治疗中风时，应避免使用剧烈的药物和手法。例如，他认为使用温和的药物如人参、黄芪等来调养气血，而不是使用强烈的药物如大黄、牡丹皮等来泻火解毒。 3. 重视养生保健：叶天士不仅关注疾病的治疗，还重视预防和养生。他认为良好的生活习惯和饮食习惯对于预防中风病具有重要作用。…	叶天士治疗中风病的学术特色主要体现在他对中风病机的深刻理解和独特治疗方法上。他强调中风病的发病与气血运行失调有关，注重调理脏腑，平衡阴阳，以达到治疗中风病的目的。叶天士的治疗方法包括针灸、草药、推拿等多种手段，综合运用以达到最佳疗效。他在临床实践中积累了丰富的经验，形成了独特的治疗方案，广受患者好评。 举例来说，叶天士在治疗中风病时常常运用穴位刺激来促进气血的流通，调节脏腑功能，加速康复进程。同时，他还注重患者的个体差异，因人而异地制定个性化的治疗方案，使治疗更加精准有效。	b	tie
解释叶桂“养胃阴”的学术思想	叶氏尊崇李东垣《脾胃论》，重视脾胃不同的生理功能和病理特点，提到“脏宜藏，腑宜通，脏腑之体用各殊也。”他强调脾胃分治，阐明太阴湿土得阳始运，阳明燥土得阴自安；所以治脾可宗东垣甘温升发，治胃则宜甘凉通降。提出养胃阴，认为不宜苦降和苦寒下夺之品，而应运用甘平或甘凉濡润之品，使津液来复，通降自成。常选用玉竹、花粉、沙参、石斛和麦冬等。华岫云称赞叶氏“此种医论，实超出千古”。	叶桂是中国著名的中医师和学者，她在中医养生领域有着深厚的造诣。叶桂提倡的“养胃阴”思想，主要是指通过调整饮食、生活习惯和适当的中药调理，来增强胃肠功能，保护胃阴，达到养生之目的。 在中医理论中，胃阴是指胃的津液和阴液，它对于维持人体的正常生理功能至关重要。胃阴不足，可能导致消化不良、胃痛、口苦等症状。叶桂认为，养胃阴不仅仅是治疗胃阴不足的症状，更是长期的养生策略。 叶桂提出的养胃阴的方法包括但不限于以下几点： 1. 调整饮食：多吃温和、易于消化的食物，如糙米、豆制品、蔬菜和水果，避免辛辣、油腻、生冷等刺激性食物，以免伤胃阴。 2. 适当补充：可以通过食用一些补胃阴的食物，如梨、蜂蜜、梨汁、黄芪、山药等，来帮助补充胃阴。 3. 调整生活习惯：保持良好的生活习惯，如适时进食、避免过度劳累、保持良好的心态等，以减少对胃的负担。 4. 中药调理：根据个人的体质和病情，适当使用一些中药，如黄芪、山…	叶桂是我国古代著名的中医学家，他在《千金要方》中提到了“养胃阴”的学术思想。在中医理论中，胃主受纳，胃阴不足会导致消化功能减退，出现胃痛、消化不良等症状。叶桂认为通过调养胃阴可以达到调节脏腑功能、平衡阴阳的目的。 养胃阴的方法包括饮食调理、药物治疗等。比如，多食用一些滋阴润燥的食物，如梨、银耳、绿豆等，可以帮助滋养胃阴；同时，也可以运用一些中药如熟地、黄精等进行治疗。叶桂的学术思想强调了内在调养的重要性，通过调整饮食结构和药物治疗来达到治疗胃病的效果。 总的来说，叶桂的“养胃阴”学术思想强调了中医养生的理念，即通过调整体内阴阳平衡来达到治疗疾病、增强身体健康的目的。	tie	b
薛生白“湿热病”的病机要领与治疗大法	薛雪，字生白，号一瓢，著《湿热条辨》，对湿热和湿温病的发病与病机规律作了系统总结。薛雪认为湿热病不同与一般的外感热病，从表伤者，十之一二，有口鼻入者，十之八九，主要发病的脏腑有太阴脾土、阳明胃腑、少阳三焦与厥阴肝木。薛雪深刻地认识到湿热病的病机在于：热为天之气，湿为地之气，热得湿而愈炽，湿得热而愈横。湿热两分，其病轻而缓；湿热两合，其病重而速。因此，治疗湿热病一定药运用三焦的特点，分消湿热。具体的治疗中还有湿热本证，湿热表证，湿邪偏盛，湿热并重，热邪偏盛，湿热充斥三焦和湿热阴伤和湿热阳虚等证治。	薛生白是清代著名的中医医家，他在《薛生白医案》中对“湿热病”的病机和治疗有着深入的研究。薛生白认为，“湿热病”是由湿邪和热邪相互作用产生的病证，常见于夏季或湿热多的地区。湿邪主要由饮食不当、生活环境潮湿等因素引起，而热邪则可能由内伤或外感引起。 薛生白认为湿热病的病机主要表现为“湿热相乘”，湿邪阻滞气血，热邪炽盛，导致身体出现发热、恶心、呕吐、腹痛、便秘或腹泻等症状。治疗湿热病，薛生白主张“祛湿除热”为要领。 治疗大法方面，薛生白提倡用药物和针灸结合。药物治疗方面，他主张使用清热燥湿的药物，如黄连、黄芩、茯苓、茅根等。同时，他也强调使用健脾利湿的药物，如茯苓、白术、陈皮等，以帮助脾胃健运，减轻湿邪的影响。 针灸治疗方面，薛生白认为可以选取利湿除热的穴位，如足三里、太冲、神阙等穴位，以助于调和气血，疏通经络，达到祛湿除热的目的。 总之，薛生白的湿热病治疗方法强调了病因病机的辨证施治，通过药…	回答: 薛生白认为“湿热病”是由湿邪和热邪相互结合所致，主要表现为湿浊与热毒相互纠缠，阻滞气血运行，导致机体失衡。治疗“湿热病”的大法主要包括清热利湿、祛湿化痰、疏风散寒等方法。具体的治疗方法可以根据患者具体的症状和体质来定，如可以采用中药调理、针灸、艾灸等中医疗法来帮助患者恢复健康。 举例来说，如果患者出现湿热病的症状，如口干、口苦、舌苔黄腻等，可以选择清热利湿的中药如黄连、黄芩等来治疗。如果患者有痰湿阻滞的症状，可以采用祛湿化痰的中药如半夏、陈皮等来调理。在治疗过程中，还需要注意患者的饮食调理，避免食用辛辣刺激性食物，多食用清淡易消化的食物。 总的来说，薛生白所提出的治疗“湿热病”的大法，是通过调理体内的湿热之邪，恢复机体的平衡，从而达到治疗疾病的目的。	a	tie
什么是朱丹溪的“阳常有余”与张景岳的“阳本无余”	朱丹溪的理论是从相火论的角度对“阳常有余”进行阐发的。人生以动为常，凡动皆是相火之为也，所以丹溪的两论是相互为用的。丹溪关于“阳有余”的真实涵义，实指相火妄动，煎熬阴精，促人早衰。而相火之妄，可由饮食、情志和房劳所引起；其中特别是心君还可以引动相火，所以人的情欲无涯，也是导致火生于妄的主要病因。张景岳年轻时，丹溪之书爱不释手，但随着自身阅历、对经典的理解和临床经验的增加，从半信半疑到坚决反对，针锋相对地提出“阳本无余”的观点，其个人的学术思想有一个发展、变化、成熟的过程。张氏的“阳本无余”，旨在区别于丹溪的相火论，他正本清源地指出“阳”为阳气，是天之红日，人之大宝，天运当以日光明。在实质涵义上，实指生理之阳，人体的阳气，阳气的虚损必然招致阴阳俱损，以及各种病理代谢产物如痰饮、瘀血的停积。总之，朱张两位医家时有前后，景岳的观点是对丹溪思想的继承与批判。丹溪得传于理学，援朱子之学于医学，把心…	朱丹溪的“阳常有余”与张景岳的“阳本无余”是中医理论中的两个概念，分别代表了两位医家对人体阴阳平衡的不同理解。 朱丹溪（1550-1634），字子敬，号丹溪，江苏常州人，是明代著名的医家，他的“阳常有余”理论认为，人体在正常情况下，阳气总是多余的，阳气的功能是主动的，具有生长、发育、活动的作用。朱丹溪认为，人体的阳气在正常情况下是充足的，只有在疾病或老化时，阳气才会不足。因此，治疗应侧重于补养阳气，恢复其正常功能。 张景岳（1019-1077），字子应，号景岳，河南洛阳人，是北宋时期的哲学家、医家，他的“阳本无余”理论则认为，人体的阳气本来就很微弱，易于耗损。张景岳认为，人体的阴阳平衡是非常脆弱的，阳气一旦耗尽，就会导致身体功能衰退甚至死亡。因此，他主张在治疗上要注意保养阴气，避免过度耗损阳气。 这两个概念虽然有所不同，但都强调了阴阳平衡的重要性。在临床实践中，医生会根据患者的具体情况，…	朱丹溪的“阳常有余”与张景岳的“阳本无余”是两位中医学家在阐述阴阳理论时的不同观点。朱丹溪认为阳气在人体中常常处于相对盛余的状态，即人体内阳气较多，需要调节平衡；而张景岳则认为阳气本身并不会有盛余的情况，只有在阴阳失衡时才会出现相对盛余的状态。两位大医家对于阴阳平衡的理解有所不同，但都强调了阴阳平衡的重要性。 举例来说，如果一个人体内阳气过盛导致火热症状，那么根据朱丹溪的理论，需要通过调节阳气来平衡阴阳；而根据张景岳的理论，则需要调节阴气来恢复阴阳平衡。 。	a	a
宋代朱肱关于伤寒六经实质的研究成果	北宋的朱肱，字翼中，著《南阳活人书》，是关于《伤寒论》研究的一部重要的学术著作，历史上有深刻而广泛的影响。朱氏从经络辨病位，率先提出六经实质的研究课题。他认为，《伤寒论》的三阴三阳即足之六经。所以，他的学说便被称为足之六经说。朱氏用“经络说”不仅解释症状，而且根据经络分析病位，并结合《素问•热论》的六经病作对比。朱肱的这些贡献对后世伤寒派的研究，以及立“六经提纲证”有很大启发。	宋代朱肱是中国古代著名的医学家之一，他在伤寒六经的研究上做出了重要贡献。朱肱认为，伤寒六经是指六个主要的经络系统，它们分别对应于人体的六个脏腑系统。朱肱的研究成果主要体现在以下几个方面： 1. 经络与脏腑的关系：朱肱强调了经络与脏腑之间的密切关系，他认为经络是脏腑功能活动的通路，是疾病发生发展的途径。例如，他认为心经与心脏相连，肝经与肝脏相连，等等。 2. 经络的分布：朱肱详细描述了经络的分布情况，他认为经络不仅仅分布在身体的表面，还深入到身体的内部，包括在脏腑内部。他还提出了经络的起止点、分支情况等。 3. 经络与疾病的关系：朱肱认为经络是疾病发生发展的关键，他强调了经络病变对人体健康的影响。例如，他认为经络的阻滞可以导致疼痛、肿胀等症状。 4. 经络的调理方法：朱肱提出了许多调理经络的方法，如针灸、按摩、拔罐等。他认为这些方法可以疏通经络，恢复经络的正常功能，从而达到治疗疾病的目的。…	朱肱是宋代著名的医学家，他在《伤寒论》的基础上进行了深入的研究，提出了关于伤寒六经实质的理论。他认为，伤寒病是由外邪侵袭人体所致，导致六经失调，表现为不同的症状。根据六经实质的理论，朱肱提出了相应的治疗方法，包括辨证施治、调理阴阳、疏通经络等。这些理论对后世的中医发展产生了重要影响。 举例来说，朱肱认为在伤寒病的治疗中，应根据患者的具体症状和体质特点来辨证施治，比如对于阳明经实质者，应重视清热泻火；对于太阴经实质者，应重视健脾和胃。通过这种个性化的治疗方法，可以更好地调理六经，达到治疗的效果。	b	a
通过各家学说的学习，怎样理解医家、学说和学派三者之间的关系	各家学说课程把医家、学说和学派三者有机地联系起来，形成了一个整体。三者之间以历代医家的学验作为基石和材料，各种学说和假说作为建筑骨架，学派则是学术思想大厦的顶端；其中学派的概念是最大的——即抓住了学派，也就抓住了中医学术思想发展的主要脉络。掌握了学派思想，便有利于正确全面地评价医家在历史上的贡献与特色。	在中医中，医家、学说和学派之间存在着密切的联系和相互影响的关系。下面我们将逐一解释这些概念，并探讨它们之间的关系。 首先，医家通常指的是在中医领域内具有杰出贡献和影响力的医生或学者。他们通过实践和研究，形成了自己的理论体系和治疗方法。例如，张仲景是中国古代著名的医家，他的《伤寒论》至今仍被广泛使用，是中医药学的经典之作。 其次，学说是指中医理论体系的总称，包括了中医的基本理论、诊断学、治疗学等方面的内容。学说是医家的理论和实践的总结，是中医传承和发展的基础。例如，四诊（望、闻、问、切）是中医诊断学的基本方法，它是医家们通过长期实践总结出来的。 最后，学派则是指在中医理论和实践上形成的特定的派别或流派。学派通常由一群医家共同形成，他们的理论和方法有着共同的特点和特征。例如，四诊学派和脉学派就是在中医理论和实践上形成的两个重要学派。 医家通过实践和研究，形成了自己的学说；学说又为医家提供了理…	回答: 医家、学说和学派是中医领域中常见的三个概念，它们之间的关系可以理解为医家代表了一位医学大家或医学流派的创始人，学说则是该医家或医学流派所倡导的医学理论或治疗方法，而学派则是在这个学说的基础上形成的一支派别或学术团体。 举个例子，孙思邈是唐代的一位著名医家，他创立了孙氏学派，该学派以"四气调神大论"为代表作，主张调理人体的气血阴阳，强调预防和调理。在孙氏学派的基础上，后来形成了一系列的医学流派和派别，如汤液学派、张仲景学派等。 因此，医家代表了医学思想的先驱和代表人物，学说是医学思想的具体体现，而学派则是在学说的基础上形成的一种传承和发展。在学习中，我们需要理解这三者之间的内在联系和发展脉络，以便更好地理解中医学的历史和学术传承。	b	a
《理虚元鉴》中对虚劳病的基本观点	明末医家汪绮石，著《理虚元鉴》，以善治虚劳见称。他把虚劳的病因总结为先天之因、后天之因、痘疹及病后之因、外感之因、境遇之因、医药之因六个方面。虚劳的证候可归结为两统。所谓两统，即阴虚成劳统之于肺；阳虚成劳统之于脾。虚劳的治法，要从三本着手，三本就是指肺、脾、肾三脏，他说：“肺为五脏之天，脾为百骸之母，肾为性命之根”。具体方药擅用清金甘桔汤、琼玉膏、清热养荣汤、还元丹等。	《理虚元鉴》是中国古代著名医家张景岳所著的一部中医理论著作。在这本书中，张景岳对虚劳病有着深入的研究和阐述。虚劳病是指由于内脏虚弱，导致身体虚弱无力，常见症状包括乏力、食欲不振、四肢无力等。 张景岳认为，虚劳病的发生与体内阴阳失调、脏腑功能衰弱有关。他主张虚劳病的治疗应从调理脏腑、补充正气入手。具体方法包括调养脾胃、补益肾精、调和阴阳等。例如，他强调了食疗的重要性，认为适当的饮食可以帮助恢复体力，如食用补气养血的食物，如鸡肉、红枣等。 张景岳还提出了“虚则补之，实则泻之”的治疗原则，即根据病情的虚实情况，采取补益或泻下的治疗方法。例如，对于脾胃虚弱的虚劳病人，可以用补脾养胃的药物，如黄芪、白术等；而对于肝肾阴虚导致的虚劳，则应用滋阴补肾的药物，如熟地黄、山萸肉等。 总之，《理虚元鉴》中对虚劳病的基本观点是，虚劳病是由于体内脏腑功能衰弱所致，治疗应侧重于补养正气，根据病情的虚实变化，采取相…	《理虚元鉴》中对虚劳病的基本观点主要包括：认为虚劳是由于元气耗散引起的，元气耗散导致了气血不足和脏腑功能失调，进而引发了一系列症状。在治疗虚劳病时，需要通过调理元气、补养气血、调理脏腑功能等方法来恢复身体的平衡和健康。 举例来说，虚劳病常见于现代社会中长期工作繁重、生活压力大的人群中，他们常常出现乏力、疲劳、精神不振等症状。针对这些症状，中医会通过中药调补、针灸、推拿等方法来调理患者的身体，恢复元气，以达到治疗虚劳病的目的。	b	b
谈谈吴师机外用膏药的主要特点	清代太平天国时期的医家吴师机，字尚先，著《理瀹骈文》，阐释了外用膏药的系统治法。外治膏药的理论根本在于：“外治之理，即内治之理，外治之药，即内治之药；所异者，法耳。”吴氏认为“凡汤丸之有效者，皆可熬膏”， 即理中、平胃、养心、归脾等内科方剂，全可入膏。但外治不像内治存在许多限制，而是无禁制、无窒碍、无牵掣、无粘滞。认为“膏者，纲也；药，目也。膏判上中下三焦，五脏六腑，表里寒热虚实。”膏药的功用为拔和截。外治者，气血流通即是补，不必从药补为补。膏中之药，必得通经走络，开窍透骨，拔病外出之品。膏主统治六经，用药百病一方，月才一合，故其数广而多。药必得气味俱厚，方能得力。药物炒用、蒸用，皆不如生用。	吴师机外用膏药是一种传统的中医膏药，它的主要特点包括： 1. 药物成分：吴师机膏药通常由多种草药和中药材制成，包括具有疏通经络、活血化瘀、消肿止痛等功效的药材，如桃仁、红花、牛黄、蜂蜜等。这些成分能够有效地缓解疼痛、促进血液循环，适用于治疗关节炎、风湿性关节炎等疾病。 2. 制作工艺：吴师机膏药的制作过程通常比较复杂，需要经过多次煎煮、研磨和混合等步骤，以确保药物成分的有效性和稳定性。这种工艺能够使得膏药具有较好的药效和持久性。 3. 应用方式：吴师机膏药通常通过外敷的方式使用，直接将膏药涂抹在患处，通过局部吸收和外敷的方式发挥作用。这种使用方式能够直接作用于病变部位，减少全身性的副作用。 4. 效果和适应症：吴师机膏药主要用于治疗关节炎、风湿性关节炎、关节疼痛等疾病。它能够有效缓解疼痛，改善关节活动度，促进炎症消退。 5. 安全性：吴师机膏药在使用时需要注意皮肤的过敏反应，使用前应进行…	吴师机外用膏药的主要特点包括：药性温和，不刺激皮肤；易于使用，贴敷方便；药效持久，可以长时间发挥作用；透皮吸收效果好，能够快速渗透到皮肤深层；对于一些皮肤病、风湿痛等疾病有良好的治疗效果。吴师机外用膏药在中医治疗中被广泛应用，是一种方便、有效的治疗方式。	tie	tie
举例说明中医学派继承性与创新性的特点。此外，通过各家学习，你认为中医学派还具有怎样的特征	五版教材七大学派，任应秋先生强调“师承授受”与“学术争鸣”两大特点，这是中医学术传承继承性与创新性的突出体现。学派的继承性的例子比比皆是，如朱丹溪为刘河间的正传，温补派医家如薛己、李中梓等继承了易水派，尤其是李东垣的学术思想。学派的创新性源于学术之分歧和争论，例如河间学派与丹溪学派就是以反对当时宋代《局方》盛行所产生的流弊应运而生的；命门派医家以反对丹溪派的“相火论”而提出“命门”的观点的。	中医学派继承性与创新性的特点体现在以下几个方面： 1. 继承性：中医学有着悠久的历史，自古以来形成了丰富的理论体系和实践经验。中医学派如黄帝内经、黄庭内经、伤寒论等经典著作，至今仍被广泛引用和研究。这些经典不仅为中医理论提供了坚实的基础，也为后世中医发展提供了宝贵的遗产。 2. 创新性：尽管中医学有着深厚的传统，但它也不断地在实践中进行创新。例如，随着医学科学的发展，中医在药物、诊断、治疗等方面不断地吸收和融合现代科技成果。同时，中医也在不断地探索新的治疗方法和理论，如针灸、推拿、拔罐等技术的现代化改进，以及中医药在现代疾病治疗中的应用。 通过学习各家中医学派，我们可以发现中医学派还具有以下特征： 1. 多元化：中医学派各有特色，代表人物如张仲景、华佗、李时珍等都有各自的理论和实践成果。学习这些不同的医学派，可以让我们更全面地理解中医的理论和实践。 2. 融合性：中医学派在理论和实践上有…	中医学派在继承性与创新性方面有着独特的特点。以四大家族为例，其中张仲景代表的“伤寒学派”在继承经典的同时，创立了伤寒杂病论，系统总结了温病的病机病理和治疗方法，对后世医家产生了深远的影响。另外，仲景的“伤寒论”也被后人不断研究和发展，体现了中医学派的创新性。 通过各家学习，我认为中医学派还具有以下特征： 1. 传承经典：各家都会传承古代经典医书，如《内经》、《伤寒论》等，并在此基础上进行学习和研究。 2. 注重实践：中医学派强调临床实践，通过不断实践和总结经验，发展出各家的独特治疗方法。 3. 多元发展：各家学派之间互相借鉴、交流，形成了多元发展的态势，丰富了中医学的理论和实践。 4. 基于整体观念：中医学派都强调整体观念，认为人体是一个有机整体，疾病是由于整体失衡而产生的，因此治疗要从整体上进行调节。 综上所述，中医学派不仅在继承性和创新性上有特点，还在传承经典、注重实践、多元发展和整…	b	b
支气管哮喘的诊断标准。	反复发作喘息、气急、胸闷或咳嗽，多与接触变应原、冷空气、物理、化学性刺激、病毒性上呼吸道感染、运动等有关。发作时在双肺可闻及散在或弥漫性，以呼气相为主的哮鸣音，呼气相延长。上述症状可经治疗缓解或自行缓解。除外其他疾病所引起的喘息、气急、胸闷和咳嗽。临床表现不典型者（如无明显喘息或体征）应有下列三项中至少一项阳性：①支气管激发试验或运动试验阳性；②支气管舒张试验阳性；③昼夜PEF 变异率≥20％。符合1～4条或4、5条者，可以诊断为支气管哮喘。	支气管哮喘的诊断标准主要基于临床症状、体征和病史。根据《中国哮喘防治指南（2019版）》，诊断支气管哮喘应满足以下条件之一： 1. 变应性气道炎症史：患者有反复发作的呼吸困难，尤其是在过敏原（如花粉、尘螨、宠物皮屑等）或非过敏原（如烟草烟雾、冷空气、运动等）存在的情况下。 2. 变应性气道炎症的体征：通过肺功能测试显示，患者在有或无刺激因素存在的情况下，出现FEV1（一秒钟强制呼气容积）下降至少20%的现象。 3. 变应性气道炎症的实验室证据：通过皮肤过敏试验或血液检查显示对特定过敏原的敏感性。 4. 变应性气道炎症的临床表现：患者有反复发作的呼吸困难、咳嗽、喘鸣等症状，且这些症状与特定的刺激因素有关联。 在诊断支气管哮喘时，医生还会考虑患者的病史、体格检查结果以及可能的过敏史等因素。通过这些信息，医生可以综合评估并确定是否为支气管哮喘的诊断。	支气管哮喘的诊断标准主要包括症状表现和肺功能检查。根据中医理论，支气管哮喘的主要症状包括喘息、气短、胸闷、咳嗽等，常常伴有咳痰、痰白稠、或黄稠等症状。在肺功能检查中，患者通常表现为呼气流量下降、呼气末正压降低等特征。 此外，中医诊断支气管哮喘还会考虑患者的体质、舌苔、脉象等方面。例如，肺热型的支气管哮喘患者常常会有口干咽燥、烦躁易怒等症状，舌苔偏红少津，脉象偏数等特点。 总的来说，支气管哮喘的诊断需要综合考虑症状、体征和检查结果，以便确定病因和辨证施治。 。	a	a
慢性支气管炎的诊断标准。	凡有慢性或反复发作的咳嗽、咳痰或伴喘息，每年发病至少持续3个月，并连续两年或以上者，在排除其他心、肺疾患后，诊断即可成立。如每年发病持续不足3个月，而有明确的客观检查依据（如X线、呼吸功能等）亦可诊断为慢性支气管炎。	慢性支气管炎的诊断标准主要基于临床症状、体征和辅助检查的综合评估。根据《中国慢性病防治指南》和《中国呼吸病学杂志》的相关研究，诊断慢性支气管炎通常需要满足以下条件： 1. 持续性咳嗽：患者需要有至少3个月的咳嗽症状，且咳嗽至少在每周有2周以上。 2. 支气管痉挛：患者可能会有呼吸困难、咳嗽或喘息等症状，尤其是在感冒或其他呼吸道感染后加剧。 3. 支气管分泌物：患者有持续性的支气管分泌物，通常为脓性或脓痰。 4. 支气管扩张：通过胸部X光片或其他影像学检查可以观察到支气管扩张。 5. 功能性评估：通过肺功能测试，如FEV1/FVC比值降低，表明有气流受限。 在诊断过程中，医生可能还会考虑患者的生活史、环境因素、过敏史等因素。此外，可能会通过血液检查、胸部X光片、肺功能测试等辅助检查来支持诊断。	慢性支气管炎的诊断标准一般包括：患者有持续咳嗽、咳痰、呼吸困难等症状，并且持续时间超过三个月；胸部X光、肺功能检查等辅助检查结果显示有慢性炎症的表现；临床医生根据患者的症状和检查结果综合判断。此外，中医诊断慢性支气管炎还会根据患者的舌苔、脉象等中医辨证来确定病情。 举例来说，根据中医理论，慢性支气管炎属于肺病范畴，可能是由于肺气虚、肺热、痰湿等因素导致。因此，在中医诊断过程中，医生会根据患者的舌苔是否厚腻、脉象是否滑数等特征来辨别病机，从而确定治疗方案。	b	b
慢性肺源性心脏病失代偿期的临床表现。	呼吸衰竭：主要是低氧血症和（或）高碳酸血症所引起的一系列症状和体征。心力衰竭：右心衰为主，也可出现心律失常，多为房性早搏及阵发性室上性心动过速。此外，少数患者可出现急性肺水肿或全心衰。	慢性肺源性心脏病（CPC）是由于慢性肺疾病导致的长期肺部高压，进而引起心脏功能障碍的一种疾病。失代偿期是指心脏功能进一步恶化，无法有效适应肺高压的需求，导致心脏功能严重受损的阶段。在失代偿期，患者可能会出现以下临床表现： 1. 疲劳和呼吸困难：患者可能会感到无缘无故的疲劳，尤其是在活动后，呼吸困难可能会加剧，甚至在休息时也会出现呼吸困难。 2. 心悸和胸痛：心脏功能受损可能导致心脏不能有效泵血，患者可能会感到心悸或胸痛，这些症状可能会随着活动的增加而加剧。 3. 水肿：由于心脏泵血功能减弱，液体可能积聚在身体的不同部位，如双下肢、腹部或肺部，导致水肿。 4. 头晕和晕厥：血液循环不畅可能导致头晕或在严重情况下出现晕厥。 5. 食欲不振和体重减轻：由于心脏功能受损，身体的新陈代谢可能受影响，导致食欲不振和体重减轻。 6. 心律失常：心脏功能受损可能导致心律不齐，如心房颤动或心室颤动。 7.…	在慢性肺源性心脏病失代偿期，患者可能表现为呼吸困难、咳嗽、咳痰、心悸、水肿等症状。这是由于慢性肺源性心脏病导致肺部功能减退，血液循环受阻，心脏负担加重所致。患者在失代偿期可能需要密切观察和治疗，以缓解症状并改善患者的生活质量。 举例来说，患者可能出现进行性加重的呼吸困难，甚至在平卧时需要额外的枕头才能呼吸顺畅。水肿可能出现在下肢、腹部或其他部位，患者可能感到乏力、食欲不振等。 中医治疗慢性肺源性心脏病失代偿期可以采用一些中药调理气血，清热解毒，疏通经络等方法，以改善症状和患者的整体健康状况。	a	a
肺心病急性加重期的治疗原则。	控制呼吸道感染；吸氧；畅通呼吸道，改善呼吸功能（解痉平喘、化痰、必要时呼吸机辅助治疗）;控制心力衰竭;并发症的处理及营养支持	肺心病急性加重期的治疗原则主要包括以下几个方面： 1. **稳定病情**：首先要稳定患者的生命体征，防止病情进一步恶化。可能需要使用氧疗、机械通气等措施来改善患者的呼吸功能。 2. **控制症状**：根据患者的具体症状，使用对症治疗，如使用支气管扩张剂来缓解哮喘症状，使用利尿剂来减轻水肿等。 3. **改善心脏功能**：由于肺心病患者心脏功能受损，治疗时应注重心脏功能的保护，可能需要使用心脏药物如利尿剂、ACE抑制剂等。 4. **调整体液**：由于肺心病患者往往伴有水肿，治疗时应注意体液的平衡，避免过度脱水。 5. **营养支持**：由于患者可能有消化吸收不良，需要通过合理的营养支持来提高患者的能量状态。 6. **心理支持**：对于患者的心理状态也要给予足够的关注和支持，避免焦虑和抑郁等情绪问题对病情的影响。 7. **预防并发症**：在治疗过程中，应密切监测患者的生命体征，预防并发…	肺心病是一种心脏病的并发症，会对肺部造成损害。在急性加重期，治疗原则主要包括以下几点：首先是处理心功能不全，包括卧床休息、氧疗、利尿剂等措施来减轻心脏负担，同时控制心律失常。其次是处理肺部损害，例如使用支气管扩张剂、吸入氧气、抗生素治疗等来缓解肺部症状。最后是控制原发疾病，如高血压、冠心病等，从根本上减轻心脏负担。 举例来说，对于急性加重期的肺心病患者，可以给予洋地黄类药物来增加心肌收缩力，改善心功能；同时也可以利用吸入雾化治疗来改善肺功能，减轻呼吸困难的症状。在治疗过程中要密切监测患者的病情变化，及时调整治疗方案。 。	tie	a
肺结核大咯血的处理措施。	一般处理，镇静、保持气道通畅，吸氧等。应用止血药物，如垂体后叶素等。补充血容量。局部止血，必要时可在明确出血部位的情况下考虑肺叶、肺段切除术;	肺结核大咯血是一种严重的并发症，需要立即就医并接受专业治疗。以下是一些处理措施： 1. **紧急医疗处理**：首先，患者需要立即就医，接受紧急医疗处理。医生可能会给予患者氧气支持，控制出血，稳定患者的生命体征。 2. **抗结核治疗**：肺结核的治疗通常包括抗结核药物的使用。医生会根据患者的具体情况开具相应的药物，并指导患者如何正确服用。 3. **抗出血治疗**：医生可能会根据患者的具体情况开具抗出血药物，如止血药或其他药物，以控制咯血。 4. **支持性治疗**：患者可能需要接受营养支持和其他支持性治疗，以帮助恢复体力和抵抗力。 5. **休息和避免刺激**：患者需要在医生的指导下进行适当的休息，避免任何可能刺激肺部的活动。 6. **定期复查**：在治疗过程中，患者需要定期复查，以监测病情的变化和治疗效果。 请注意，以上信息仅供参考，具体治疗方案应由专业的中医师或医生根据患者的具体…	中医认为肺结核大咯血是由于肺经痰热壅滞所致，治疗时应该清热化痰、润肺止血。常用的中药治疗包括白花蛇舌草、款冬花、连翘等具有清热解毒、止血化痰的药材。此外，患者还需要注意适当的休息，避免劳累，保持情绪稳定，避免受凉。饮食上应以清淡易消化为主，多吃一些清热润肺的食物，如梨、雪梨、白萝卜等。同时，病情严重时应及时就医，接受专业治疗。	a	a
肺结核的临床分型。	肺结核分为五型：原发型肺结核、血行播散型肺结核、继发型肺结核以及结核性胸膜炎、其他肺外结核。	肺结核的临床分型主要包括以下几种： 1. 原发性肺结核：通常发生在年轻人中，尤其是青少年和成年早期。它通常与原发性结核病相关，表现为单个或多个肺结核结节，常见于上叶的中下部。原发性肺结核的典型体征是Ghon复合体，即一个或多个肺结核结节和相应的淋巴结炎。 2. 再发性肺结核：这通常发生在已经感染过结核病的人身上，可能是由于原发性结核未得到充分治疗导致的复发，也可能是全身性结核病转移到肺部。再发性肺结核的病变通常更为广泛，可能涉及肺的多个区域。 3. 迁延性肺结核：这是一种治疗不完全导致的结核病，病变在治疗后没有完全消退，可能会逐渐扩散。迁延性肺结核的病变通常较大，且可能伴有破坏性改变。 4. 全身性结核病：这种类型的结核病不仅影响肺部，还可能影响其他器官，如肝、脾、脑、骨骼等。全身性结核病的临床表现多样，可能包括发热、体重减轻、食欲不振等全身性症状。 5. 混合型肺结核：这种类型的结核病…	肺结核的临床分型通常包括原发型、继发型和播散型。原发型肺结核是指初次感染结核菌引起的病变，通常在肺的上叶发生。继发型肺结核是指曾经治疗过结核病而复发的情况，通常在肺的下叶发生。播散型肺结核是指结核菌通过血液传播到其他器官或组织引起的结核病变。 举例来说，原发型肺结核的临床表现常见的症状包括咳嗽、咳痰、低热、盗汗等。继发型肺结核常常表现为复发性咳嗽、咳痰、消瘦、乏力等症状。而播散型肺结核则可能引起全身症状，如高热、心悸、贫血等。 。	b	b
肺结核的临床表现。	全身症状：全身中毒症状多表现为长期低热，多见于午后，可伴乏力、盗汗、食欲减退、体重减轻、面颊潮红、妇女月经失调等。呼吸系统症状：咳嗽、咯血、胸痛、呼吸困难。体征：取决于病变性质和范围。早期多无异常体征。渗出性病变范围较大或干酪样坏死时，则可以有肺实变体征，如触觉语颤增强、叩诊浊音、听诊闻及支气管呼吸音和细湿啰音。较大的空洞性病变听诊也可以闻及支气管呼吸音。当有较大范围的纤维条索形成时，气管向患侧移位，患侧胸廓塌陷、叩诊浊音、听诊呼吸音减弱并可闻及湿啰音。结核性胸膜炎时有胸腔积液体征：气管向健侧移位，患侧胸廓望诊饱满、触觉语颤减弱、叩诊实音、听诊呼吸音消失。	肺结核是一种常见的慢性传染病，主要影响肺部，但也可以扩散到其他器官。其临床表现多样，主要包括以下几种： 1. **慢性咳嗽**：这是肺结核最常见的症状，咳嗽可能是干咳或带痰，痰液可能是清水样或带血。 2. **咳嗽痰中带血**：随着病情的发展，咳嗽痰中可能出现血丝或血块，这是由于肺部的炎症和组织破坏引起的。 3. **体重减轻**：由于消化系统的影响，患者可能会出现食欲不振和体重减轻。 4. **发热**：发热可能是全身性的，尤其是在病情初期或病情加重时。 5. **夜间盗汗**：患者可能会在睡眠中出汗，白天可能感觉潮湿或冷汗。 6. **疲劳**：患者可能会感到全身无力，活动后容易疲倦。 7. **胸痛**：在某些情况下，患者可能会感到胸痛，尤其是在深呼吸或咳嗽时。 8. **呼吸困难**：如果肺结核导致肺部结构破坏，患者可能会感到呼吸困难。 9. **胸部X光片异常**：在体检中，胸…	肺结核的临床表现包括慢性咳嗽、咳痰、咯血、低热、盗汗、乏力、食欲不振等症状。在中医理论中，肺主气机，肺结核的临床表现与肺气虚弱、肺热炽盛等因素有关。通过中医辨证施治，可以根据患者的具体症状和体质特点制定个性化的治疗方案，包括草药、针灸、艾灸等治疗方法。	tie	a
肺炎球菌患者出现感染性休克怎么治疗?	一般处理：卧床休息，观察生命体征，保持呼吸道通畅；补充血容量；纠正水电解质和酸碱平衡失调：主要为纠正代谢性酸毒，必要时可用碳酸氢钠；应用糖皮质激素；应用血管活性药物；控制感染防治心肾功能不全	感染性休克是严重的全身性感染导致的低血压状态，需要立即的医疗干预。对于肺炎球菌感染引起的感染性休克，治疗通常包括以下几个方面： 1. 抗生素治疗：首先需要使用广谱抗生素迅速控制感染。由于肺炎球菌通常对青霉素类抗生素敏感，可能会使用青霉素类药物如青霉素G或第三代头孢类抗生素如头孢他啶等。治疗应根据药敏试验结果进行调整。 2. 支持性治疗：需要进行充分的液体和电解质补充，以维持血压稳定。可能需要使用血管活性药物如多巴胺或去甲肾上腺素来支持血压。 3. 抗休克治疗：如果患者出现休克症状，应立即进行休克治疗，包括使用血管扩张剂和支持性治疗。 4. 抗炎治疗：可能需要使用非甾体抗炎药（NSAIDs）或糖皮质激素来减轻炎症反应。 5. 血液支持：如果患者出现凝血功能障碍，可能需要血液成分的输注。 6. 抗生素的联合使用：在某些情况下，可能需要联合使用多种抗生素，以确保对多种可能的病原体的覆盖。 7.…	中医治疗感染性休克的方法主要包括清热解毒、活血化瘀、补气养血等。针对肺炎球菌感染导致的感染性休克，中医可能会采用一些草药如黄连、连翘、大黄等具有清热解毒功效的药材来治疗。此外，还可以通过针灸、推拿、拔罐等中医疗法来帮助患者恢复体内的平衡，调节气血循环，提高免疫力，加速康复过程。 举例来说，中医可能会采用桂枝汤、加减四逆汤、清胃承气汤等方剂来治疗感染性休克患者，具体用药剂量和疗程需要根据患者的具体情况来确定。	a	a
重度及危重哮喘的抢救措施。	保持气道通畅，吸氧分拟肾上腺素药物应用：沙丁胺醇氨茶碱静点大量补液，稀释痰液糖皮质激素静脉使用保持电解质及酸碱平衡控制感染、去除诱因必要时予以呼吸机应用.	重度及危重哮喘的抢救措施通常包括以下几个方面： 1. **药物治疗**：首先，应立即使用吸入性支气管扩张剂（如氨茶碱、沙丁胺醇等），以迅速缓解气道痉挛和改善呼吸困难。对于重度哮喘，可能需要使用系统性糖皮质激素（如泼尼松）进行静脉注射，以迅速减轻炎症反应。 2. **氧疗**：确保患者有足够的氧气供应，通过面罩或鼻导管进行氧疗，以提高血氧饱和度。 3. **监测**：密切监测患者的生命体征，如血氧饱和度、心率、血压等，及时发现并处理可能出现的并发症。 4. **休息**：让患者在医生的指导下进行适当的休息，避免过度劳累。 5. **心理支持**：哮喘患者在危重状态下可能会感到极度焦虑和恐惧，医护人员应提供必要的心理支持和安慰。 6. **紧急医疗干预**：如果患者出现呼吸衰竭的迹象，如意识模糊、呼吸停止等，应立即进行紧急医疗干预，包括气管插管和机械通气。 在中医的角度上，重度及危重哮喘的治…	中医治疗哮喘的抢救措施包括使用针灸、中药、推拿等方法。首先要缓解病人的呼吸困难和喉头痉挛，可以使用针灸穴位如太渊、太冲等来缓解症状。同时，中药方剂如麻黄汤、葛根汤等有助于扩张气道、平喘止咳。另外，推拿按摩穴位也可以帮助疏通气道，缓解哮喘症状。在危重情况下，应及时就医，根据病情给予相应的中西医结合治疗，以确保患者的生命安全。 。	a	a
核菌素试验阴性反应的临床意义。	提示没有感染结核感染结核杆菌在4-8周内目前正患有百日咳、麻疹或其他营养不良的疾病，或正使用糖皮质激素、免疫抑制剂等。严重肺结核恶性肿瘤或其他免疫缺陷病	核菌素试验（也称为Mantoux试验或PPD试验）是一种用于检测人体是否感染了结核分枝杆菌的免疫学检查。试验中，患者的皮肤上注射一小剂量的结核分枝杆菌提取物，如果患者曾经接触过结核分枝杆菌，或者已经感染了结核病，身体会产生免疫反应，导致注射部位出现局部炎症。 核菌素试验阴性反应意味着在注射后通常不会出现明显的炎症反应，这可能有以下几种临床意义： 1. **未感染或未接触过结核分枝杆菌**：如果患者在进行核菌素试验后没有出现任何反应，通常可以认为该患者没有感染结核分枝杆菌，也没有接触过结核分枝杆菌。 2. **免疫功能低下**：如果患者的免疫系统功能低下，如HIV感染者、长期使用糖皮质激素或免疫抑制剂的患者，可能会出现核菌素试验阴性，因为他们的免疫系统无法有效地对结核分枝杆菌提取物产生反应。 3. **最近接种活疫苗**：在接种活结核分枝杆菌疫苗（BCG疫苗）后，患者可能会出现核菌素试验阳…	核菌素试验是一种用于检测结核病的方法，通常用于筛查肺结核的患者。当核菌素试验呈阴性反应时，意味着患者的身体并没有对结核菌产生明显的免疫反应，即体内并没有明显的结核病菌感染。这可能是因为患者并未感染结核菌，或者是感染后免疫系统反应不强烈而导致的。 在临床上，核菌素试验阴性反应并不代表患者绝对没有结核病，因为有些人感染结核菌后免疫系统反应较弱，可能出现假阴性结果。因此，在诊断结核病时，医生需要综合患者的临床症状、影像学检查、痰液培养等多种检查手段综合判断。 举例来说，有些患者免疫系统功能较差，如艾滋病患者，可能会出现核菌素试验阴性反应，但实际上已经感染了结核菌。因此，医生在诊断结核病时需要谨慎对待核菌素试验结果，并结合其他检查手段进行综合判断。	a	a
原发性支气管肺癌肿瘤局部转移引起的症状	胸痛，呼吸困难,吞咽困难声音嘶哑,上腔静脉综合症,霍纳综合征等。	原发性支气管肺癌（Non-Small Cell Lung Cancer, NSCLC）是一种常见的肺部恶性肿瘤，可能会通过局部转移（即癌细胞扩散到肺部周围组织）引起一系列症状。这些症状取决于癌细胞转移的位置和数量。以下是一些可能的症状： 1. **胸痛**：当肿瘤局部转移到胸壁、胸膜或肺周围组织时，可能会引起胸痛，尤其是在深呼吸、咳嗽或转体时加剧。 2. **呼吸困难**：如果肿瘤压迫或阻塞了气道，患者可能会感到呼吸困难，尤其是在活动时。 3. **咳嗽**：肿瘤本身可能会引起咳嗽，而局部转移可能会导致咳嗽加重或咳嗽中带有血。 4. **咯血**：肿瘤可能会导致咯血，尤其是如果癌细胞转移到了气管或支气管。 5. **胸腔积液**：癌细胞转移到胸膜后可能会引起胸腔积液，这可能会导致呼吸困难和胸痛。 6. **体重减轻**：由于癌症的代谢改变和可能的食欲不振，患者可能会出现体重减轻。 7. …	中医学认为原发性支气管肺癌肿瘤局部转移引起的症状可能包括咳嗽、咳痰、胸痛、呼吸困难等。根据中医理论，这些症状可能是由于肺经受到阻塞、瘀滞或虚弱引起的。中医治疗原发性支气管肺癌肿瘤局部转移的方法包括清热解毒、活血化瘀、理气祛痰等。具体的治疗方法需要根据患者的具体症状和体质特点来进行个性化调理。 举例来说，对于出现咳嗽、咳痰等症状的患者，中医可能会采用柴胡、枳壳、款冬花等清热化痰的药物进行治疗。而对于胸痛、呼吸困难等症状，中医可能会采用当归、川芎、红花等活血化瘀的药物来缓解疼痛和改善呼吸。综合运用中医药中的各种治疗方法，可以帮助患者减轻症状、提高生活质量。	tie	a
慢性肺源性心脏病急性加重期的常见并发症。	肺性脑病；酸碱平衡失调及电解质紊乱；心律失常；休克；消化道出血；其他 如功能性肾功能衰竭、弥散性血管内凝血等。	慢性肺源性心脏病（COPD）急性加重期时，患者可能会出现一系列并发症，这些并发症可能会对患者的生命安全构成威胁。以下是一些常见的并发症： 1. **呼吸衰竭**：这是COPD急性加重的最常见并发症之一。患者可能会出现呼吸困难加剧，甚至出现蓝皮症（皮肤呈现青紫色），这是由于血液中氧气含量降低，二氧化碳积累过多所致。 2. **心律失常**：由于心脏长期承受高压力，可能会导致心律失常，如心房颤动、心室颤动等，这些情况需要立即医疗干预。 3. **肺出血**：COPD患者的肺部可能会出现血管破裂，导致肺部出血，这是一种紧急情况，需要立即医疗处理。 4. **低氧血症**：患者可能会出现低氧血症，需要使用氧气治疗。 5. **酸中毒**：由于呼吸功能受损，患者可能无法有效排出二氧化碳，导致血液pH值降低，出现酸中毒。 6. **电解质紊乱**：长期的呼吸困难可能导致患者出现电解质失衡，如低钾血症…	慢性肺源性心脏病急性加重期的常见并发症包括肺水肿、心律失常、心力衰竭、肺动脉高压等。在这种情况下，肺源性心脏病导致肺部功能减退，影响心脏正常的功能，进而引发上述并发症。治疗上需要及时处理加重期的症状，维持患者的呼吸和心脏功能，同时也需要进行原发病的治疗，以减少并发症的发生。 举例来说，如果患者出现肺水肿，需要给予利尿剂、氧疗等治疗措施；如果出现心律失常，需要调整药物治疗或者进行心脏起搏治疗。综合中西医治疗，可以有效地控制并发症的发展，提高患者的生存率和生活质量。 。	a	a
心源性哮喘和支气管哮喘的鉴别。	病史：支气管哮喘有哮喘发作史、个人或家族过敏病史，心源性哮喘有高血压性心脏病史、冠心病病史、风湿性心脏病病史或梅毒性心脏病病史。发病年龄：支气管哮喘多见于青少年，心源性哮喘多见于中老年。发病季节：支气管哮喘好发于春秋季节，心源性哮喘发病季节性则不明显。诱因：支气管哮喘多与过敏、运动等因素有关，心源性哮喘多与劳累、输液过多、感染等诱因。 症状：支气管哮喘发作性喘息为主，痰少，心源性哮喘咳大量粉红色泡沫痰.肺部体征：支气管哮喘呼气时间延长、可闻及较广泛的哮鸣音，心源性哮喘两肺满布湿啰音。心脏体征：支气管哮喘无心脏病基础者正常，心源性哮喘可见左心增大、心尖部奔马律及病理性杂音。辅助检查：支气管哮喘胸片肺野清晰或透亮度增高，心源性哮喘胸片可见肺淤血及左心增大，心电图、心超可有相应阳性表现。治疗：支气管哮喘解痉平喘治疗可缓解，心源性哮喘强心利尿、扩血管有效。	心源性哮喘和支气管哮喘虽然都可能导致呼吸困难，但它们的病因和机制有所不同，因此在诊断和治疗上需要区分。 心源性哮喘是由于心脏功能障碍导致的肺循环血流增加，引起的气道平滑肌痉挛和炎症反应。它通常与心脏疾病如心力衰竭、心包炎或心脏瓣膜病等相关。患者可能会有心悸、呼吸困难、水肿等症状。 支气管哮喘则是由于气道过敏反应、炎症或刺激导致气道平滑肌收缩和气道黏膜肥厚，引起的反复发作性呼吸困难。它可能与过敏原、烟草烟雾、空气污染等因素有关。 在鉴别这两种疾病时，医生可能会通过以下几个方面进行区分： 1. 症状：心源性哮喘的患者可能会有夜间呼吸困难、早晨醒来时呼吸困难、活动后呼吸困难等特点。而支气管哮喘的患者可能会有特定的诱因，如过敏原、烟草烟雾等。 2. 病史：了解患者的病史，包括心脏疾病的家族史、过敏史等。 3. 体格检查：心源性哮喘可能伴有心脏杂音、肺部湿啰音等体征，而支气管哮喘则可能有肺部哮鸣音…	心源性哮喘是由心脏疾病引起的呼吸困难，常常伴有胸闷、胸痛等心脏症状，而支气管哮喘是由支气管痉挛引起的呼吸困难，常常伴有咳嗽、喘息等呼吸道症状。在中医看来，心源性哮喘是因为心火上炎，气机不畅所致，治疗时需要清热祛火、疏肝利胆；而支气管哮喘则是由外感风寒、肺气不降引起，治疗时需要祛风散寒、宣肺平喘。因此，通过患者的症状表现、舌诊、脉诊等方法进行综合分析，可以判断出哮喘的病因是心源性还是支气管性。 举例来说，如果患者出现胸闷、心悸、舌红苔黄等心脏症状，可以考虑为心源性哮喘；而如果患者出现喘息、咳嗽、气促、舌淡苔白等呼吸道症状，可以考虑为支气管哮喘。	a	a
如何鉴别心绞痛和急性心肌梗死？	心绞痛发作时间一般在15分钟以内，不伴恶心，呕吐，休克，心功能不全。无严重的心律失常，亦无血清酶升高。心电图无变化或仅有ST段短暂性压低或抬高。	鉴别心绞痛和急性心肌梗死通常需要结合患者的症状、体征、实验室检查和影像学检查等多方面信息。以下是一些鉴别的关键点： 1. 症状：心绞痛通常表现为胸痛或压迫感，可能伴有出汗、恶心、呼吸困难等症状。这种痛感通常与特定的活动或情绪变化有关，且疼痛通常可以通过休息或药物缓解。急性心肌梗死的疼痛通常更加剧烈、持续时间更长，且疼痛不易缓解。 2. 病史：了解患者的病史非常重要。心绞痛患者往往有慢性冠心病的病史，而急性心肌梗死患者可能有先前的心绞痛发作史，但这并不绝对。 3. 体征：心绞痛患者可能在休息时无症状，但在进行剧烈活动后出现症状。急性心肌梗死患者可能出现心动过速、低血压、呼吸困难、意识改变等体征。 4. 实验室检查：心绞痛患者的血液检查可能显示轻微的肌酸激酶（CK）升高，而急性心肌梗死患者的CK-MB和心型肌酸激酶（troponin）水平显著升高。 5. 影像学检查：心电图（ECG）可以显示…	心绞痛和急性心肌梗死都是心脏病的一种表现，但二者有一些不同之处。鉴别心绞痛和急性心肌梗死的方法包括症状、持续时间和ECG表现。 心绞痛通常是由于冠状动脉狭窄引起的心肌缺血所致，疼痛通常发作在体力活动或情绪激动时，并且可以通过休息或服用硝酸甘油缓解。疼痛通常持续几分钟到十几分钟不等，一般不会持续超过30分钟。 而急性心肌梗死则是由于冠状动脉阻塞导致心肌缺血坏死，疼痛通常剧烈且持续时间较长，不易被休息或硝酸甘油缓解。此外，急性心肌梗死患者可能伴有恶心、呕吐、出冷汗等症状，且ECG表现也会有明显的变化。 因此，通过分析症状的特点、持续时间以及ECG表现等方面可以帮助鉴别心绞痛和急性心肌梗死。	b	b
典型心绞痛有哪些特点？	突然发作的胸痛呈压迫性、紧缩性等钝性疼痛。常有一定的诱因。历时短暂，一般不超过十五分钟。休息或含用硝酸甘油后可迅速缓解。	心绞痛，又称为心肌梗死或心脏绞痛，是一种由于冠状动脉供血不足导致的心脏肌肉暂时性缺血和缺氧的症状。典型的心绞痛特点包括： 1. 疼痛的位置：疼痛通常位于胸部，可能向颈部、肩部、臂部、颈部、背部或下颌部放射。 2. 疼痛的特征：疼痛通常是压迫性或紧绷感，可能是刀割样或压迫感，有时也可能是胀痛。 3. 疼痛的持续时间：疼痛通常持续数分钟到30分钟，持续时间较长的疼痛可能是心肌梗死的迹象。 4. 疼痛的诱因：疼痛可能在剧烈运动、情绪压力、寒冷或饥饿时加剧。 5. 疼痛的缓解：疼痛通常在休息或服用尼古丁类药物后缓解。 需要注意的是，心绞痛的症状可能因人而异，有些人可能没有典型的胸痛感，而是出现呼吸困难、恶心、呕吐或出汗等非典型症状。因此，对于疑似心绞痛的症状，应立即就医。	典型心绞痛的特点包括：发作时持续时间短暂（通常在几分钟内），疼痛性质为压榨性、闷痛或窒息感，常常在胸骨后部或胸前部，也可放射至左肩、左臂、颈部或下颚，发作时可伴有出汗、恶心、呕吐、呼吸困难等症状。此外，心绞痛通常会由情绪激动、剧烈运动或寒冷天气等诱发。 举例：一个患者在激烈运动后突然出现胸痛，疼痛感压榨且向左臂放射，同时伴有冒汗、恶心的症状，这种情况可能是典型的心绞痛表现。	b	a
室上性心动过速的治疗？	刺激迷走神经的方法。升压药物。抗心律失常药维拉帕米，普罗帕酮，β—受体阻滞剂，普鲁卡因胺，奎尼丁，胺碘酮等。	室上性心动过速（Supraventricular Tachycardia, SVT）是一种心律失常，指的是心脏的上室（包括房室结和房室结上方的区域）过快地跳动。中医治疗SVT通常会采用以下方法： 1. 调整气血：SVT可能与气血运行不畅有关，中医会通过调整气血来缓解症状。例如，通过使用活血化瘀的药物如桃仁、红花、丹参等来促进血液流通。 2. 调整脏腑功能：SVT可能与脏腑功能失调有关，中医会通过调整脏腑功能来治疗。例如，通过调整心脏的功能，使用心脏药物如丹参、红花、川芎等。 3. 调整阴阳平衡：SVT可能与阴阳失衡有关，中医会通过调整阴阳平衡来治疗。例如，通过使用调和阴阳的药物如黄芪、茯苓等。 4. 外治法：在某些情况下，中医还会采用外治法，如针灸和拔罐等来直接影响心脏的功能。 需要注意的是，室上性心动过速是一种严重的心脏问题，治疗时应遵循医生的指导。在紧急情况下，可能需要使用电击治疗（…	对于室上性心动过速的治疗，中医可以采用针灸、中药、推拿等方法进行调理。针灸可以通过调节气血运行，平衡阴阳，缓解心脏过快的状况。中药方面，可以选用具有安神补心、调节心脏功能的药物进行治疗。此外，推拿按摩也可以通过调理气血，促进心脏功能的平稳运行。但在进行中医治疗之前，一定要确诊病因，避免误诊导致病情加重。 举例来说，对于室上性心动过速病人，可以选取一些具有降心率作用的中药如丹参、黄芪等进行治疗。针灸也可以选择一些穴位如内关、神门等进行调理。在治疗过程中，需要密切关注病人的病情变化，及时调整治疗方案。	tie	tie
右心功能不全的临床表现有哪些？	颈静脉怒张。肝脏肿大伴压痛（肝淤血），肝颈静脉回流征阳性。下肢凹陷性水肿等。	右心功能不全是指右心室或右心房的泵血功能受损，导致血液淤积在体循环和静脉系统中。其临床表现主要包括： 1. **体循环淤血**：患者可能会出现面部、颈部、腹部和下肢水肿，尤其是在站立或坐着时更加明显。 2. **静脉曲张**：由于血液淤积，患者可能会出现下肢的静脉曲张，表现为肿大的静脉，颜色可能是青紫色。 3. **呼吸困难**：右心功能不全可能导致肺循环淤血，患者可能会感到呼吸困难，尤其是在活动时。 4. **疲劳和乏力**：由于心脏无法有效泵血，患者可能会感到全身疲劳和乏力。 5. **腹水**：血液淤积可能导致腹水，表现为腹部膨胀。 6. **心悸**：患者可能会感到心悸或胸闷。 7. **体重增加**：由于水肿和腹水，患者可能会体重增加。 8. **肝大**：由于门静脉压力增高，可能导致肝脏增大。 需要注意的是，右心功能不全的症状可能与其他疾病的症状相似，因此确诊需要通过心电图、…	右心功能不全的临床表现主要包括：下肢水肿、腹水、颈静脉怒张、肝大、右上腹压痛等。此外，患者可能会出现呼吸困难、乏力、心悸等症状。 中医认为右心功能不全属于心脏疾病范畴，通常是由于脾胃失调、气血循环不畅等原因导致。中医治疗右心功能不全可以通过调理脾胃、活血化瘀、理气和胃等方法来改善症状。 举例来说，可以采用中药药物如丹参、川芎、桃仁等来活血化瘀；也可以通过穴位按摩、艾灸等中医疗法来调理脾胃、促进气血循环。 。	b	b
如何鉴别胃溃疡与溃疡型胃癌？	胃溃疡多见于青壮年，病史较长，周期性、节律性腹痛，全身情况好，内科疗效好，粪便隐血可暂时阳性，胃酸正常或稍低 ，X线钡餐见腔外龛影，胃镜下溃疡小、平、净、光；胃癌多见于中老年，病史较短，进行性、无节律性腹痛，全身情况差，内科疗效差，粪便隐血持续阳性，胃酸缺乏 ，X线钡餐见腔内龛影，胃镜下溃疡大、不平、污垢、结节 .	鉴别胃溃疡与溃疡型胃癌是一个复杂的过程，通常需要结合临床症状、体征、实验室检查、影像学检查以及内镜检查等多种方法。以下是一些鉴别的关键点： 1. 临床症状：胃溃疡的典型症状包括上腹痛，通常与进食有关，尤其是在空腹时痛感更为明显。溃疡型胃癌的症状可能包括上腹痛、食欲不振、体重减轻、恶心、呕吐等，但这些症状可能与其他疾病相似，因此不够特异性。 2. 体征：体检时可能发现胃溃疡患者有轻微的上腹部压痛，而溃疡型胃癌患者可能有无明显的体征，但有时可能会有腹部肌肉紧张或腹部固定感。 3. 实验室检查：血液检查可能显示胃溃疡患者有轻微的贫血或低蛋白血症，而溃疡型胃癌患者可能有更为严重的贫血、低蛋白血症以及癌症相关的标志物异常。 4. 影像学检查：胃镜下超声波检查可以帮助观察胃壁的厚度，溃疡型胃癌可能导致胃壁增厚。胃镜下超声波检查可以帮助区分溃疡的深度和范围，溃疡型胃癌的溃疡通常更深，边缘更不规则。 5…	胃溃疡与溃疡型胃癌都可能出现腹痛、消化不良、反酸等症状，因此需要进行一定的鉴别诊断。一般来说，胃溃疡多为慢性疾病，病程较长，症状较轻，通常会有饥饿感加重的特点，而溃疡型胃癌则可能伴随体重减轻、贫血等恶性肿瘤的表现。此外，通过内镜检查可以观察溃疡的形态、大小、位置等特点，结合组织活检可以明确病变的性质。如果存在疑虑，建议及时就医进行进一步检查和诊断。 举例：胃溃疡患者的内镜检查结果显示溃疡边缘光滑、表面平整，没有明显的充血、溃疡基底清晰，可能更有可能是胃溃疡。而溃疡型胃癌的内镜检查结果通常显示溃疡边缘不规则、表面凹凸不平，基底模糊，结合组织活检发现癌细胞存在。	b	b
肝硬化肝功能失代偿期有哪些临床表现？	肝脏本身改变及肝功能减退的临床表现：营养障碍，肝脏肿大或缩小；消化道症状；出血倾向和贫血；内分泌失调。门脉高压症的表现：脾脏肿大；侧支循环建立与开放；腹水。	肝硬化的失代偿期是指肝脏的再生能力已经丧失，无法有效地修复损伤，导致肝功能进一步恶化。在这个阶段，患者可能会出现以下临床表现： 1. 腹水（腹水）：由于肝脏不能有效地处理体液，患者可能会出现腹部肿胀，甚至出现腹水。 2. 食欲不振：肝脏功能受损，影响到消化系统的正常运作，导致食欲下降。 3. 体重减轻：由于消化吸收功能下降，食欲不振，患者可能会出现体重减轻。 4. 肝性脑病：肝脏不能有效清除血液中的毒素，可能导致神经系统受累，出现肝性脑病的症状，如昏睡、谵妄、癫痫等。 5. 出血倾向：肝脏是血液凝固的重要场所，肝功能受损可能导致血液凝固功能障碍，出现出血倾向。 6. 肝肾综合征：肝硬化患者可能会出现肾功能障碍，称为肝肾综合征。 7. 肝癌风险增加：肝硬化患者有较高的风险发展成肝细胞癌。 8. 肌肉无力：肝脏是体内多种维生素和矿物质的代谢中心，功能受损可能导致肌肉无力。 9. 黄疸：肝脏不…	在肝硬化肝功能失代偿期，患者可能会出现以下临床表现： 1. 腹水：由于肝功能减退，导致肝脏无法正常产生足够的蛋白质，从而引起体内蛋白质的流失，造成腹腔内液体聚集。 2. 腹胀、消化不良：肝硬化患者消化功能减弱，肠道功能受损，容易出现腹胀、腹泻、便秘等消化不良症状。 3. 肝性脑病：由于肝功能障碍，无法清除体内毒素，导致脑部受损，出现认知障碍、昏睡、精神异常等症状。 4. 乏力、食欲减退：肝功能减退会导致身体无法正常代谢营养物质，出现乏力、食欲减退等全身症状。 5. 发热、肝区疼痛：肝硬化患者在失代偿期可能会出现发热、肝区疼痛等症状，这是由于肝脏受损引起的炎症反应所致。 临床表现因人而异，还会受到肝硬化病因、病程、合并症等因素的影响，因此在出现上述症状时应及时就医并接受专业治疗。 。	tie	a
上消化道出血的治疗原则。	一般治疗（休息，防治呕吐物误吸，吸氧，病情监测）；补充血容量（输血或血浆代用品）；止血措施（垂体后叶素，三腔二囊管压迫止血，内镜下直视止血，手术治疗）.	上消化道出血的治疗原则主要包括以下几个方面： 1. **止血治疗**：首先要采取措施控制出血，中医认为出血是由于气血亏虚、脾胃虚弱、肝火上炎等原因引起的。因此，治疗上消化道出血应首先采用止血药物，如桃仁、红花、当归、黄芪等，结合中药复方制剂，如活血化瘀止血药物。 2. **调理脾胃**：由于上消化道出血往往与脾胃功能不和有关，治疗应注重调理脾胃，增强脾胃功能，常用药物有茯苓、陈皮、甘草等。 3. **调节气血**：气血平衡是人体正常生理活动的基础，出血后应通过中药调节气血，恢复体内气血平衡，常用药物有当归、黄芪、白术等。 4. **清热解毒**：如果出血与肝火上炎有关，应使用清热解毒的药物，如菊花、连翘、茵陈等。 5. **饮食调理**：饮食上应注意温和易消化的饮食，如糙米粥、清淡蔬菜水果等，避免辛辣、油腻、生冷等刺激性食物。 6. **生活方式调整**：应注意休息，避免过度劳累，保持良…	中医治疗上消化道出血的原则是清热止血，调整脾胃功能，促进伤口愈合。具体的治疗方法包括中药内服和外治相结合。内服方面可以选用清热止血的中药如生地黄、地榆、白及等；外治方面可以采用穴位贴敷、拔罐等方法促进血液循环，加速伤口愈合。此外，还需要配合合理的饮食调理，避免刺激性食物，保持消化系统的正常功能。 举例来说，对于由胃溃疡引起的上消化道出血，可以采用黄连、阿胶等中药进行治疗，同时忌烟酒辛辣等刺激性食物，保持充足的休息，有助于胃部的愈合和恢复。 。如果有更多问题欢迎继续提出。	a	a
急性胰腺炎的诊断依据及处理原则。	诊断依据：暴食或饮酒后突然发生上腹持续疼痛、恶心、呕吐、发热及血清淀粉酶增高。治疗原则；控制炎症发展：禁食及胃肠减压；减少胰腺分泌；减低胰酶活性。全身支持及对症治疗：止痛；补充营养；抗休克。减少并发症：抗感染；多器官受累处理。外科治疗。	急性胰腺炎的诊断主要依据临床症状、实验室检查和影像学检查。临床症状包括上腹痛、恶心、呕吐、体重减轻等。实验室检查中，血清胰腺酶（如胰腺淀粉酶、胰凝血酶原）升高是诊断急性胰腺炎的重要指标。影像学检查如B超可以显示胰腺和周围组织的炎症改变。 处理原则包括： 1. 保持患者的生命体征稳定，尤其是监测血压、心率和呼吸情况。 2. 休息，避免剧烈运动。 3. 通过静脉输液补充水分和电解质，必要时使用胰岛素降低血糖。 4. 对于轻度病例，可能只需要保守治疗；对于中度至重度病例，可能需要手术干预，如切除炎症的胰腺组织。 5. 对于感染性胰腺炎，可能需要抗生素治疗。 6. 遵循中医的原则，如调理脾胃、养阴清热、活血化瘀等，以促进病情恢复。	回答: 急性胰腺炎的诊断依据主要包括患者的症状、体征以及实验室检查结果。常见的症状包括腹痛、恶心、呕吐等；体征包括腹部压痛、腹肌紧张等；实验室检查常见的异常包括血淀粉酶和血清淀粉酶的升高等。处理原则是治疗原发病因、控制炎症、缓解症状并预防并发症。在中医中，可采取清热解毒、理气和胃、活血化瘀等方法来治疗急性胰腺炎，如清热利湿的龙胆泻肝丸、理气和胃的保和丸等。同时，患者还需要注意饮食，避免过于油腻和刺激性食物，保持情绪稳定等。	tie	a
急性胰腺炎的临床表现。	症状： 腹痛；恶心、呕吐；发热；黄疸；低血压或休克。体征：急性水肿型胰腺炎腹部体征较轻，多数有左上腹或上腹部压痛，局限性肌紧张和反跳痛，也可有腹胀和肠鸣音减弱。坏死型胰腺炎多表现有急性腹膜炎体征，有全腹压痛和肌紧张，腹部拒按；麻痹性肠梗阻时肠鸣音消失；腹部移动性浊音阳性为腹水的征象，腹水常为血性且淀粉酶增高。少数患者可出现脐周皮肤蓝-棕（Cullen征），是由于胰液外溢消化胰腺周围组织所造成局部的瘀血。若当血液通过腹膜后渗入腹壁，在腰部脊柱旁出现蓝-绿-棕色（Crey-Turner）提示病情严重。若形成胰腺脓肿或假囊肿时，腹部可触及肿块。	急性胰腺炎是一种常见的消化系统疾病，其临床表现主要包括： 1. 上腹痛：这是急性胰腺炎最典型的症状，通常位于上腹部，可能向背部放射，疼痛可能突然发作，持续时间较长，且可能伴随剧烈。 2. 呕吐：患者可能会出现恶心和呕吐，尤其是呕吐物中含有胃内容物。 3. 体重减轻：由于消化不良和食欲不振，患者可能会出现体重减轻。 4. 黄疸：在一些情况下，患者可能会出现黄疸，表现为皮肤和眼白变黄。 5. 腹肌紧张：患者可能会感到腹部肌肉紧张，腹部可能会出现压痛。 6. 脱水：由于呕吐和腹泻，患者可能会出现脱水症状，如口渴、尿量减少等。 中医认为，急性胰腺炎可能与肝肾阴虚、脾胃虚弱等因素有关。治疗上，中医可能会采用疏肝解毒、养阴润肺、健脾益胃等方法。例如，使用黄连、黄芩等解毒药物，配合人参、白术等滋补药物，以恢复脾胃功能，调和气血。	急性胰腺炎的临床表现包括腹痛、恶心、呕吐、发热、腹胀等症状。其中腹痛是最常见且最突出的症状，多为持续性、钝痛或灼痛，常位于上腹部并向背部放射。患者还可能出现腹肌紧张、心动过速、血压下降等情况。在中医的治疗中，一般会采用清热解毒、疏肝理气、祛痰止痛等方法来治疗急性胰腺炎，同时也会根据患者的具体情况来调配中药进行治疗。	a	a
慢性肾炎的临床表现。	水肿：为慢性肾炎的主要症状，轻者仅出现于眼睑及踝部；严重者可遍及全身，甚至胸腔、腹腔及心包积液。高血压：部分患者以高血压为首发症状，多为持续性中度以上高血压。贫血：慢性肾炎常有不同程度的贫血。尿异常改变：蛋白尿是慢性肾炎必有的临床表现，量多为其特点；血尿发生于各种类型的慢性肾炎，多为镜下血尿；管型尿，当蛋白尿和血尿明显增多时尿内常出现各种管型。肾功能损害	慢性肾炎是一种慢性炎症性疾病，主要影响肾脏的滤过功能。其临床表现多样，通常包括以下几个方面： 1. **水肿**：由于肾脏不能有效地排除体内的废物和多余的水分，患者可能会出现面部、手脚、腹部等部位的水肿。 2. **血尿**：肾脏受损导致血液渗透到尿液中，患者可能会出现尿液呈现深色或带血丝。 3. **蛋白尿**：肾脏滤过功能受损，导致大量蛋白质通过尿液排出体外，患者可能会出现尿液浑浊或尿量增加。 4. **高血压**：慢性肾炎可能导致肾脏产生的肾素-血管紧张素-醛固酮系统活跃，引起血压升高。 5. **乏力**：由于肾脏功能受损，可能导致体内多种营养物质和电解质的代谢紊乱，引起全身乏力。 6. **贫血**：慢性肾炎可能导致红细胞生成减少或破坏增加，引起贫血。 7. **骨骼疾病**：肾脏功能受损可能导致磷和维生素D代谢异常，引起骨质疏松或其他骨骼疾病。 8. **神经系统症状**：在…	慢性肾炎的临床表现主要包括尿量减少、蛋白尿、血尿、高血压、水肿等症状。患者可能会出现全身疲乏、食欲不振、体重下降等非特异性症状。在中医理论中，慢性肾炎属于“肾虚”范畴，可引起肾阳虚、肾阴虚等不同类型的证候。治疗慢性肾炎时，中医会根据患者的具体情况选择相应的药物、针灸或其他治疗方法，以调理肾脏功能，改善症状。 举例来说，对于慢性肾炎患者出现的水肿症状，中医可能会采用逍遥散、五苓散等利水消肿的方剂进行治疗；对于肾阳虚引起的疲乏、腰膝酸软等症状，中医可能会采用补肾壮阳的药物进行治疗。 。	a	a
慢性肾盂肾炎的诊断标准。	诊断：有尿感反复发作史1年以上，肾外形凹凸不平，两肾大小不等；静脉肾盂造影可见肾盂肾盏变形狭窄；肾盂形状异常；持续性肾小管功能损害	慢性肾盂肾炎的诊断通常需要结合临床症状、实验室检查和影像学检查的结果。以下是诊断慢性肾盂肾炎的一些标准： 1. 临床症状：患者可能会有持续的或反复发作的尿频、尿急、尿痛、尿急尿频伴有尿痛等症状。同时，可能伴有腰痛、下腹痛或全身性症状如发热、乏力等。 2. 实验室检查：血液检查可能显示白细胞增多、尿液检查可能显示尿液中白细胞和蛋白质增多，尿液细菌培养可发现尿路感染的细菌。尿液常规检查中的白细胞计数和红细胞计数也可能升高。 3. 影像学检查：B超、CT扫描或尿路造影等检查可以帮助观察肾脏和输尿管的结构变化，如肾结石、肾盂扩张、输尿管阻塞等。 4. 临床表现：慢性肾盂肾炎的诊断还需要考虑患者的长期症状和病史，包括是否有慢性感染的迹象，如反复发作的感染、慢性炎症反应等。 需要注意的是，慢性肾盂肾炎的诊断不仅仅依赖于单一的检查结果，而是需要综合考虑多方面的信息。因此，确诊时应由专业的医疗人员进行综…	慢性肾盂肾炎的诊断通常需要综合临床表现、实验室检查和影像学检查等多方面的信息。一般来说，慢性肾盂肾炎的诊断标准包括： 1. 临床表现：慢性肾盂肾炎患者常常表现为反复发作的腰痛、尿频、尿急、尿痛等症状。有些患者可能还会有发热、全身不适等表现。 2. 实验室检查：常规尿液检查可以发现白细胞、红细胞、蛋白质等异常，尿培养可能会发现细菌感染。血液检查中白细胞计数增高、C反应蛋白升高等也有助于诊断。 3. 影像学检查：包括B超、CT、MRI等检查可以显示肾盂肾炎的病变情况，如肾盂积水、肾盂肾炎的病灶等。 综合以上信息，结合患者的临床表现和检查结果，医生可以做出慢性肾盂肾炎的诊断。在诊断过程中，还需要排除其他可能引起类似症状的疾病，如肾结石、泌尿系统肿瘤等。 举例：根据患者的临床表现和尿液检查发现白细胞计数增高、尿培养阳性，结合B超检查显示肾盂积水，可以初步诊断为慢性肾盂肾炎。	tie	a
泌尿系感染反复发作的易感因素。	尿路梗阻 是诱发尿感并易于上行的最主要原因。梗阻可由尿路解剖或功能异常引起，包括结石、肿瘤、畸形或神经性膀胱等。膀胱输尿管返流及其他尿路畸形和结构异常；器械使用；代谢因素；机体抗病能力	泌尿系感染（PUIT）是指影响泌尿系统的细菌性感染，尤其是影响尿道、膀胱、肾脏的感染。反复发作的泌尿系感染可能与多种易感因素有关，包括： 1. **性行为**：性活跃的女性，特别是那些经常更换性伴侣的女性，患泌尿系感染的风险较高。性行为可能导致细菌从阴道进入尿道。 2. **不完全排空膀胱**：如果在排尿后膀胱中仍有残留尿液，细菌就有机会在尿液中繁殖，引起感染。 3. **尿路梗阻**：如前列腺增生、结石或肿瘤等梗阻可能导致尿液停留时间延长，增加感染风险。 4. **糖尿病**：糖尿病患者血糖水平升高，可能导致尿液中糖分增加，成为细菌生长的营养源。 5. **免疫系统功能低下**：如HIV/AIDS、使用免疫抑制剂等情况下，身体的免疫力下降，难以抵御细菌感染。 6. **女性荷尔蒙水平变化**：如更年期或使用避孕药等荷尔蒙治疗可能影响女性的泌尿系统，增加感染风险。 7. **不正确的卫生…	泌尿系感染反复发作的易感因素可能包括免疫力较弱、生活习惯不良、长期憋尿、饮食不当等。在中医看来，泌尿系感染可能与体内的湿热有关，湿热内蕴易导致感染反复。因此，平时可以通过调整饮食结构，避免辛辣刺激性食物，多喝水，保持良好的生活习惯等方式来预防感染的发生。另外，中医药中也有一些治疗泌尿系感染的方法，如中药疗法、针灸疗法等，可以帮助改善体内的湿热情况，减少感染的发生。	a	a
什么是糖尿病慢性并发症?	微血管病变：糖尿病肾病、糖尿病视网膜病变、糖尿病心肌病,大血管病变，动脉粥样硬化累及主动脉、冠状动脉、脑动脉、肾动脉等引起冠心病、脑血管病、肾动脉硬化、肢体动脉硬化等,神经系统并发症，累及中枢神经系统、周围神经系统、自主神经病变；糖尿病足	糖尿病慢性并发症是指由于长期血糖水平过高导致的一系列并发症，这些并发症可能会影响糖尿病患者的健康状况，甚至威胁生命。常见的糖尿病慢性并发症包括： 1. 糖尿病肾病（糖尿病性肾病）：高血糖会损伤肾脏的血管和小管，导致肾功能逐渐恶化，最终可能发展为肾衰竭，需要透析或肾移植。 2. 糖尿病视网膜病变：高血糖会导致视网膜的小血管损伤，引起视网膜出血、水肿和新生血管形成，最终可能导致视力丧失。 3. 糖尿病神经病变（糖尿病性周围神经病变）：高血糖会损伤神经，导致感觉减退、疼痛、麻木、无力等症状，严重时可能导致截瘫。 4. 糖尿病足：由于血管和神经损伤，糖尿病患者可能会出现足部感染和坏死，严重时可能需要切除肢体。 5. 心血管疾病：糖尿病患者血管壁的损伤增加了心脏病、脑血管病、动脉硬化等心血管疾病的风险。 6. 糖尿病关节炎：高血糖可能导致关节软骨损伤，引起关节疼痛和活动受限。 7. 糖尿病皮肤病变…	糖尿病慢性并发症是指糖尿病患者长期高血糖导致的各种器官和组织损伤。常见的糖尿病慢性并发症包括糖尿病肾病、糖尿病视网膜病变、糖尿病神经病变等。中医认为，糖尿病患者长期内脏脏腑受损，气血失调，导致各种并发症的发生。因此，中医治疗糖尿病时不仅要控制血糖水平，还需要调理脏腑功能，平衡气血，以预防和减缓慢性并发症的发展。 举例来说，中医可以采用草药治疗来调节患者的气血，提高免疫力，保护肾脏功能等，以减缓糖尿病慢性并发症的发展。同时，中医还强调调整患者的生活方式，包括饮食习惯、作息时间等，以帮助患者更好地控制糖尿病病情。 。	a	a
糖尿病酮症酸中毒的治疗措施	补液；胰岛素治疗，小剂量胰岛素疗法，0.1 U／（kg•h），加于生理盐水中；3.纠正酸碱平衡失调及电解质紊乱；补钾 ；去除诱因，治疗并发症	糖尿病酮症酸中毒（DKA）是一种严重的并发症，需要立即的医疗干预。中医在治疗DKA时，通常会结合西医的治疗措施，同时采用一些中医的调理方法。以下是一些中医相关的治疗措施： 1. 调整饮食：减少高糖、高脂肪的食物摄入，增加蔬菜、水果和全谷物的摄入量，以帮助控制血糖水平。 2. 中药调理：中医可能会使用一些具有清热解毒、利水渗湿作用的中药，如黄连、茯苓、泽泻等。同时，使用一些补气养阴、益胃生津的药物，如黄芪、白术、甘草等，以帮助恢复身体的阴阳平衡。 3. 中医外治法：如针灸、拔罐、刮痧等，可以帮助调节身体的气血运行，促进新陈代谢，缓解症状。 4. 中医饮片：如六味地黄丸、四物汤等，用于滋阴补肾、调养脾胃，帮助恢复身体的正常功能。 5. 生活方式调整：增加运动量，保持良好的生活习惯，如规律作息、减压等，以帮助控制血糖水平。 请注意，以上提到的中医治疗措施应在专业中医师的指导下进行，并且不能替代…	中医治疗糖尿病酮症酸中毒的重点是调理气血，清热解毒，补肾养阴。通常可以采用中药调理，如黄芪、山药、枸杞子等具有补气养血、滋阴润燥的药物。同时，中医还会根据病情综合施治，比如对于糖尿病患者，还需要控制饮食，避免高糖高脂食物，保持适当的运动等。 此外，中医还会根据个体情况进行针灸、艾灸、拔罐等辅助治疗方法。这些方法可以帮助调节体内气血运行，促进新陈代谢，提高机体免疫力。 总的来说，中医治疗糖尿病酮症酸中毒是综合调理，旨在改善患者体质，提高自身抵抗力，减少发作风险。 。	tie	tie
如何鉴别动脉血栓性脑梗死、脑出血及蛛网膜下腔出血？	动脉血栓性脑梗死：病因多为脑动脉粥样硬化，起病较缓，意识障碍较少，偏瘫常有，脑膜刺激征阴性，脑脊液清亮，CT显示脑内低密度区；脑出血：病因多为高血压，起病较急，意识障碍多见，偏瘫常有，脑膜刺激征偶有，脑脊液血性压力高，CT显示脑内高密度区；蛛网膜下腔出血：病因多为血管畸形，起病急，意识障碍常一过性，偏瘫少见，脑膜刺激征明显，脑脊液均匀血性，CT显示蛛网膜下腔或脑室内高密度区。	鉴别动脉血栓性脑梗死、脑出血及蛛网膜下腔出血通常需要通过一系列的临床检查和影像学检查来完成。以下是各自的鉴别点： 1. 动脉血栓性脑梗死（脑梗死）： - 症状：通常表现为急性发作的局灶性神经系统症状，如偏瘫、言语障碍、视力障碍等。 - 影像学：通过MRI或CT扫描可以观察到脑组织的低信号区域，通常在血管成像（如DSA或MRA）中可以看到血管内的栓子。 - 临床表现：患者可能有高血压、糖尿病、心脏病等基础疾病。 2. 脑出血： - 症状：急性发作，可能伴有剧烈头痛、意识改变、肢体瘫痪等。 - 影像学：CT扫描可以迅速显示出血区域，MRI则可以更清晰地显示出血的性质和范围。 - 临床表现：患者可能有高血压史，出血点通常位于脑深部结构，如基底节、海马体等。 3.蛛网膜下腔出血（SDH）： - 症状：可能包括急性头痛、意识模糊、颈部僵硬、肢体瘫痪等。 - 影像学：CT扫描或MRI可以显示出血在蛛…	中医鉴别动脉血栓性脑梗死、脑出血及蛛网膜下腔出血主要通过病史询问、望诊、闻诊、问诊、切诊等四诊合参的方式进行。一般来说，动脉血栓性脑梗死多见于老年人，病程较长，症状渐进，可能伴有一侧肢体无力、言语不清等症状；脑出血多因高血压等原因引起，突发性发病，症状较重，常伴有剧烈头痛、呕吐等表现；蛛网膜下腔出血则多见于中老年人，常由头部外伤等引起，症状较急，可伴有意识障碍、抽搐等表现。 通过综合分析患者的病史、症状、体征等信息，结合中医四诊合参的方法，可以更准确地鉴别动脉血栓性脑梗死、脑出血及蛛网膜下腔出血，从而为后续的治疗提供指导。 。	a	a
肝硬化的常见并发症有哪些？	急性上消化道出血、肝性脑病、原发性肝癌、感染、门脉高压性胃病、肝肾综合征、电解质和酸碱平衡紊乱、肝肺综合征、门静脉血栓形成等.	肝硬化是一种慢性肝脏疾病，其可能导致的并发症较为多样。常见的并发症包括： 1. 肝性脑病：由于肝脏功能受损，无法有效清除血液中的毒素（如氨），这些毒素会影响大脑功能，导致患者出现精神状态改变、意识模糊、甚至昏迷等症状。 2. 肝癌：肝硬化患者有一定比例会发展成肝细胞癌，这是一种恶性肿瘤，需要通过手术、放疗、化疗等方法进行治疗。 3. portal 高压和门静脉曲张：肝硬化时，门静脉压力增高，可能导致门静脉曲张和出血。门静脉曲张还可能引起食管和胃底静脉曲张出血，这是一种危及生命的并发症。 4. 肝性肾病：肝硬化患者可能会出现肾功能障碍，表现为蛋白尿、血尿和肾功能衰竭。 5. 电解质紊乱：肝脏在维持体内电解质平衡中扮演重要角色，肝硬化可能导致钾、钠、氯等电解质水平的异常。 6. 肝性脑病的并发症：如肌肉痉挛、颅内压增高等。 这些并发症的发生可能会影响患者的生活质量，并且在某些情况下，需要紧急…	肝硬化的常见并发症包括肝性脑病、腹水、肝癌等。肝性脑病是由于肝功能受损导致肝脏无法处理体内的毒素，导致大脑功能受损而引起的症状，表现为意识障碍、精神症状等。腹水是由于肝硬化引起的门脉高压导致腹腔内液体渗出，表现为腹部膨隆、腹水搏动等。肝癌是肝硬化患者的常见恶性肿瘤，严重影响患者的预后。	a	a
肝硬化腹水形成的原因	门静脉压力增高；低蛋白血症；肝淋巴液生成过多；继发性醛固酮增多；抗利尿激素分泌增多；有效循环血容量不足。	肝硬化腹水的形成主要是由于肝脏功能受损，导致门脉高压和淋巴回流障碍。门脉高压是由于肝脏纤维化和结节形成，阻塞了门脉血液的正常流向，导致门静脉压力升高，从而使腹水形成。淋巴回流障碍则是由于肝硬化导致的腹腔内淋巴管受压，影响了腹水的正常吸收。 例如，在某些肝硬化患者中，门脉高压可能会导致食管静脉曲张和胃底静脉曲张等并发症，而淋巴系统的功能障碍则可能导致腹水持续积聚，影响患者的生活质量。	肝硬化腹水形成的原因主要是由于肝脏发生严重病变导致肝功能减退，血浆蛋白合成减少，造成体内的血浆胶体渗透压下降，从而引起血浆蛋白渗透性增加，水分在血管和组织间隙内潴留增多，最终形成腹水。此外，肝硬化还可能导致门静脉高压，血液不能正常流回心脏，进而导致腹水的发生。 举例来说，肝硬化最常见的原因是长期酗酒、慢性病毒性肝炎、脂肪肝等造成的肝脏损伤，引发了肝硬化的发展，最终导致腹水形成。 .	a	b
肝硬化腹水的治疗措施。	限制水、钠的摄入；利尿；提高血浆胶体渗透压；放腹水疗法；自身腹水浓缩回输术；外科治疗如经颈静脉肝内门体分流术等。	肝硬化腹水的治疗措施主要包括以下几个方面： 1. **药物治疗**：首先，医生可能会开处方给你服用利尿剂，如螺内酯、呋塞米等，以帮助减少体内水分，缓解腹水症状。同时，可能会使用抗生素治疗腹水中的细菌或病毒感染。 2. **生活方式调整**：患者需要避免高盐饮食，减少液体摄入，避免过度劳累，保持适当的体位，避免长时间站立或坐着，尽量多休息。 3. **饮食疗法**：饮食疗法是中医治疗肝硬化腹水的重要组成部分。患者可以通过食疗来调整肝脏功能，改善肝硬化腹水的症状。例如，食用山药、茯苓、白术等健脾利水的中药材，有助于减轻腹水。 4. **中医治疗**：中医治疗肝硬化腹水通常会采用针灸、拔罐、推拿等手法，通过调整气血、调和脏腑功能，促进体内水液代谢，减轻腹水症状。 5. **手术治疗**：在某些情况下，可能需要通过腹水引流术来缓解患者的症状。这种手术可以帮助减少腹水，改善患者的生活质量。 6. …	对于肝硬化腹水的治疗，中医通常会采用中药治疗的方法。首先需要根据患者的具体情况，包括肝硬化的病情严重程度、腹水积聚的情况等，进行个性化的治疗方案。常用的中药包括茵陈蒿汤、逍遥散等，这些中药可以利水消肿、调理肝脏功能、改善腹水症状等。同时，患者在治疗过程中需要遵循中医养生原则，如饮食调理、保持心情舒畅、避免过度劳累等，以提高治疗效果。 举例来说，茵陈蒿汤是一种经典的中药方剂，具有清热利湿的功效，适用于湿热内蕴引起的腹水。在治疗过程中，医生会根据患者的具体情况调整药物的剂量和配方，以达到最佳的治疗效果。	a	a
急性肾小球肾炎可出现哪些尿异常的表现？	少尿：每日尿量可少于500ml；血尿：可出现肉眼血尿和镜下血尿，后者可持续较长时间； 蛋白尿：多数患者有蛋白尿，若持续存在提示病情迁延，或转成慢性的可能。	急性肾小球肾炎（Acute Glomerulonephritis）是一种常见的肾脏炎症，主要影响肾脏的滤过单位——肾小球。这种疾病可能由感染（如链球菌感染）引起，尤其是在感染后几周内。尿液检查是诊断急性肾小球肾炎的重要手段之一。以下是可能出现的尿异常表现： 1. **蛋白尿**：肾小球受损可能导致蛋白质从尿液中渗透出来，出现大量蛋白尿。蛋白尿的程度可以从轻微到大量不等。 2. **血尿**：由于肾小球的损伤，尿液中可能含有血细胞，表现为血尿。血尿的颜色可能从轻微的茶色到深红色不等。 3. **红细胞尿**：在血尿中，尿液中可能含有大量的红细胞，可能伴有血块。 4. **白细胞尿**：在某些情况下，尿液中可能含有白细胞，这可能是由于尿路感染或其他并发症。 5. **尿液泡沫**：由于大量蛋白质的丢失，尿液中可能出现泡沫状。 6. **尿量减少**：肾脏功能受损可能导致尿量减少。 7. **…	急性肾小球肾炎患者在尿液检查中可能会出现以下一些异常表现：蛋白尿、血尿、管型尿、白细胞尿等。其中，蛋白尿是比较常见的表现，由于肾小球滤过功能受损，导致大量蛋白质从尿液中泄漏出来。血尿则是由于肾小球毛细血管受损，导致尿液中出现血液成分。管型尿则是由于肾小管功能受损，导致管型蛋白质等物质从尿液中泄漏出来。白细胞尿则可能是由于感染等原因引起的。这些尿液异常表现都是反映了患者肾功能受损的情况。 举例：一个急性肾小球肾炎患者在尿液检查中发现大量蛋白尿，经过进一步检查确诊为急性肾小球肾炎。 。	a	a
慢性肾功能衰竭出现贫血的原因。	肾分泌促红细胞生成素（EPO）减少,红细胞寿命缩短；血中抑制红细胞生成的物质增多；失血、营养不良等；由于血小板功能下降，常有出血倾向，如鼻出血、齿龈出血、皮肤於斑、胃肠道出血等。	慢性肾功能衰竭（CKD）患者出现贫血的原因主要有以下几点： 1. 红细胞生成减少：肾脏不仅负责过滤血液中的废物，还参与调节红细胞生成。肾功能衰竭时，可能会影响红细胞生成素（EPO）的产生，EPO是促进红细胞生成的关键激素。缺乏EPO会导致红细胞生成减少，引起贫血。 2. 红细胞破坏增加：肾脏还负责清除血液中的老旧红细胞。肾功能衰竭时，可能会影响到这一功能，导致红细胞破坏加快，从而引起贫血。 3. 铁代谢紊乱：肾脏参与铁的代谢和储存。肾功能衰竭可能会导致铁代谢紊乱，影响血红蛋白的合成，进而引起贫血。 4. 维生素缺乏：肾功能衰竭患者可能因为肾脏过滤功能减弱，导致维生素B12和叶酸等营养素的代谢和排泄异常，进而引起贫血。 5. 血液循环问题：慢性肾病患者可能会出现血液循环不良，影响氧气和营养物质的输送，导致组织和器官缺氧，进而引起贫血。 治疗慢性肾功能衰竭患者的贫血，通常需要通过补充铁、维生…	慢性肾功能衰竭导致贫血的主要原因是肾脏功能受损，无法有效地产生足够的红细胞生成素（EPO）。EPO是一种促进骨髓产生红细胞的激素，肾脏是其主要产生器官。当肾功能减退时，EPO的生成减少，导致机体无法产生足够的红细胞，从而引发贫血。 此外，慢性肾功能衰竭患者常伴有慢性炎症状态和营养不良，这也会影响红细胞生成和造成贫血。另外，肾功能衰竭导致的尿毒症、骨骼系统疾病等情况也可能对贫血的发生起到一定的作用。 在中医看来，慢性肾功能衰竭导致贫血可以与“肾主水，主血”、“肾藏精华”等理论联系起来，认为肾脏功能减退导致了机体精气亏虚，影响了血液的生成和循环，从而引发贫血。 举例来说，根据中医理论，慢性肾功能衰竭导致的贫血可以通过中药调理肾气、益气养血的方法来进行治疗，以达到改善贫血症状的目的。 。	a	a
慢性肾衰高钾血症的治疗措施。	控制含钾食物、药物的摄入，避免输库存血。可用利尿剂增加排钾，可口服降血钾树脂。10％葡萄糖酸钙10ml静脉注射.高渗葡萄糖加胰岛素静脉滴注，胰岛素与葡萄糖的比例为1 U∶3～5g。5%碳酸氢钠250ml静脉滴注。紧急时应血透治疗。	慢性肾衰高钾血症的治疗措施主要包括以下几个方面： 1. 限制钾的摄入量：减少高钾食物的摄入，如香蕉、豆类、海鲜等，尽量选择低钾的饮食。 2. 利用药物降钾：医生可能会开处方给予钾离子交换树脂、磷酸铈、磺胺甲氧脲等药物来帮助降低血钾水平。 3. 利尿剂治疗：使用利尿剂如螺内酯、呋塞米等帮助身体排出多余的钾离子。 4. 血液透析：对于血钾水平难以通过药物控制的患者，可能需要进行血液透析来迅速降低血钾。 5. 监测血钾水平：定期监测血钾水平，确保治疗效果，并及时调整治疗方案。 在治疗过程中，患者应密切关注身体状况，出现任何不适应症状应及时就医。同时，慢性肾衰患者应遵循医嘱定期进行检查和治疗，以维持血钾水平在正常范围内。	回答: 对于慢性肾衰高钾血症的治疗，中医通常会采用中药治疗的方法。一般来说，中医会根据患者的具体情况，综合分析病情，制定个性化的治疗方案。治疗的关键是通过中药调理肾脏功能，促进体内代谢平衡，降低血钾水平。 常用的中药包括桃仁、山楂、泽泻、白术等，这些中药有清热利湿、健脾利水的功效，可以帮助患者排出体内多余的钾离子。此外，中医还会结合针灸、艾灸等中医疗法，通过调理经络、气血，促进身体的自我修复能力。 当然，在进行中医治疗的同时，患者还需注意饮食，避免高钾食物的摄入，如香蕉、土豆等。同时，规律作息，适量运动也是非常重要的。 总的来说，中医治疗慢性肾衰高钾血症是一个综合性的过程，需要长期坚持，才能达到理想的效果。	a	a
贫血的临床表现。	一般表现：苍白、头晕、乏力循环系统表现：心悸、气短、心脏杂音消化系统：纳差、恶心、腹胀泌尿生殖系统表现：尿异常，月经不调等。	贫血是指血液中红细胞数量减少、红细胞中血红蛋白含量减少或红细胞的质量差异，导致血液运输氧气能力下降。临床上，贫血的表现可以多种多样，主要包括： 1. 疲劳：由于氧气输送不足，身体组织和器官可能会感到疲劳，尤其是在运动或体力劳动后。 2. 呼吸急促：为了补偿氧气的不足，患者可能会感到呼吸急促或加快。 3. 头晕：由于大脑得到的氧气减少，患者可能会感到头晕或头昏。 4. 心悸：心脏需要更多的氧气来维持正常的泵血功能，因此可能会感到心悸。 5. 面色苍白：由于血液中红细胞减少，皮肤和黏膜可能显得苍白。 6. 食欲不振：贫血可能导致身体组织缺氧，影响食欲和消化吸收。 7. 发热：在某些类型的贫血中，如感染性贫血，可能会伴随发热。 8. 四肢无力：肌肉和其他组织由于缺氧，可能会感到无力或疲软。 9. 头痛：由于大脑组织缺氧，可能会感到头痛。 10. 晕厥或晕倒：在严重的贫血情况下，可能会出现晕厥或…	贫血的临床表现包括皮肤苍白、乏力、头晕、心悸、呼吸急促、注意力不集中、容易疲劳等。在中医理论中，贫血常常被认为是气血不足的表现，可以通过调理脾胃、补益气血的方法来进行治疗。例如，可以通过食疗调理，如多食用红枣、桂圆、猪肝等具有补血养血作用的食物，或者选择一些中药补益气血，如当归、黄芪、枸杞等。同时，还可以结合适当的运动和调节作息时间来改善贫血症状。	a	a
贫血的发病机制。	红细胞生成减少，根据病因不同又分为造血功能衰竭和造血原料缺乏两种情况；红细胞破坏加速（寿命缩短），根据机制不同又可分为红细胞膜异常、红细胞酶缺陷、血红蛋白异常和外界因素干扰四种情况；红细胞丢失过多，即失血性贫血。	贫血是指血液中红细胞数量减少、红细胞中血红蛋白含量减少或红细胞的形态功能异常，导致组织和器官的氧气输送能力下降。其发病机制主要包括以下几种： 1. 生长发育需求：儿童和青少年在快速生长发育期间，身体对铁、维生素B12和叶酸等营养素的需求增加，如果摄入不足，可能导致贫血。 2. 营养不良：缺乏足够的铁、叶酸、维生素B12和维生素C等营养素，会影响红细胞的生成，导致贫血。 3. 内分泌疾病：如甲状腺功能减退症，会影响身体的新陈代谢，包括红细胞的生成。 4. 慢性疾病：慢性疾病如慢性肝病、慢性肾病、慢性感染等，可能会影响红细胞的生成。 5. 遗传因素：某些遗传性疾病，如地中海贫血，会导致红细胞生成异常。 6. 外伤和手术：大出血或大量输血可能导致贫血。 7. 药物副作用：某些药物，如抗癫痫药、抗生素等，可能会影响红细胞的生成。 8. 生活方式：不健康的饮食习惯、缺乏运动、吸烟和过量饮酒等，都可…	贫血的发病机制主要包括以下几个方面：一是因为脾胃功能不佳，导致消化吸收功能减弱，影响人体对营养物质的吸收和利用，从而导致贫血；二是肝气郁结、情志不畅，导致气血运行不畅，影响气血的生成和运输，进而导致贫血；三是因为肾气不足，导致骨髓功能减弱，影响造血功能，也会引发贫血。同时，中医认为情志不畅、饮食不节、劳累过度等因素都可能导致贫血的发生。 举例来说，中医中常见的贫血病因之一是“脾虚不运”。脾主运化水湿，水湿不健则脾气不能运化，导致气血生成不足，从而出现贫血症状。在治疗贫血时，中医会根据患者的具体病情，采用补脾益气、活血化瘀等方法来调理，以达到治疗贫血的目的。 。	a	a
贫血的严重程度分度。	贫血的程度可分为极重度贫血，血红蛋白量≤30g/L；重度贫血血红蛋白量31～60g/L ；中度贫血，血红蛋白量61～90g/L；轻度贫血，血红蛋白量＞90g/L与低于正常参考值的下限之间。	中医对于贫血的诊断和分度主要基于四诊（望、闻、问、切）和辨证论治的原则。中医认为贫血是由于气血不足导致的，可以分为气血不足和气滞血瘀两种类型。 气血不足型贫血：这类患者通常表现为面色苍白、头晕耳鸣、心悸失眠、四肢乏力、舌色淡、脉细弱等症状。中医分度上可以根据患者的气血虚弱程度来区分轻、中、重。例如，轻度可能表现为上述症状较轻，中度则症状较为明显，重度则可能伴有心悸、潮红、头晕加剧等。 气滞血瘀型贫血：这类患者可能会有面色青紫、关节疼痛、肿块、瘀点、瘀斑等症状。中医分度上可以根据瘀血的严重程度来区分。例如，轻度可能表现为局部瘀点或瘀斑，中度则可能伴有关节疼痛、肿胀，重度则可能出现严重的局部功能障碍。 在中医治疗贫血时，会根据患者的具体体质和病情进行针对性的治疗，如使用活血化瘀、补气养血的中药等。同时，中医还强调调整生活习惯，如合理饮食、适量运动、保持良好的心理状态等，以促进身体的自我恢复。	贫血的严重程度可以根据患者的血红蛋白水平和症状来进行分度。一般来说，按照血红蛋白水平，贫血可以分为轻度、中度和重度。其中，轻度贫血的血红蛋白水平略低于正常范围，患者可能会感到疲倦、乏力等；中度贫血的血红蛋白水平进一步下降，患者可能会出现心悸、头晕等症状；重度贫血的血红蛋白水平明显下降，患者可能会出现严重的贫血症状，如皮肤苍白、气短等。 除了血红蛋白水平外，中医还会根据患者的舌苔、脉象等情况来判断贫血的严重程度。比如，舌质苍白、舌苔薄白，脉象沉细无力等表现可能提示贫血较为严重。 举例来说，如果一个患者出现了持续的疲倦乏力、头晕心悸等症状，同时舌质苍白，舌苔薄白，脉象沉细无力，那么可能是重度贫血。 。	b	b
再生障碍性贫血的诊断标准。	1987年全国再障学术会议修订了再障的诊断标准：全血细胞减少，网织红细胞绝对值减少。一般无脾肿大。骨髓至少有一部位增生减低或重度减低(如增生活跃，须有巨核细胞明显减少)，骨髓小粒成分中应见非造血细胞增多(有条件者应做骨髓活检)。能除外引起全血细胞减少的其他疾病。一般抗贫血药物治疗无效。	再生障碍性贫血（Aplastic Anemia）是一种罕见的疾病，其诊断标准通常基于临床表现、实验室检查和骨髓活检的结果。以下是诊断再生障碍性贫血的主要步骤和标准： 1. 临床表现：患者可能会出现贫血、感染频繁、出血倾向和骨髓抑制等症状。这些症状可能会逐渐发展，或者在短时间内迅速恶化。 2. 血液检查：通过全血细胞计数（CBC）可以观察到血细胞数量的显著下降，包括红细胞、白细胞和血小板。血液检查还可能显示血细胞的形态学异常。 3. 骨髓活检：这是诊断再生障碍性贫血的金标准。通过活检可以观察到骨髓中造血干细胞的减少或功能障碍，导致血细胞的生成减少。骨髓活检还可以帮助区分其他可能导致类似症状的疾病。 4. 免疫学检查：在某些情况下，可能会进行免疫学检查，以排除免疫介导的再生障碍性贫血，如自身免疫性再生障碍性贫血。 5. 其他检查：可能还包括遗传学检查，以排除遗传性疾病，如Fanconi贫血。…	再生障碍性贫血的诊断标准主要包括：1.全血细胞减少：包括贫血、白细胞减少和/或血小板减少；2.骨髓增生减低：骨髓增生活性减低，表现为骨髓细胞数量减少、巨核细胞减少或消失等；3.排除其他原因所致的全血细胞减少：需要进行详细的病史询问、体格检查、实验室检查等以排除其他原因引起的全血细胞减少，如感染、药物反应、自身免疫性疾病等。 举例来说，如果一个患者出现贫血、白细胞减少和血小板减少的症状，同时骨髓检查显示骨髓增生活性减低，且经过详细检查排除其他病因引起的全血细胞减少，那么可以初步诊断为再生障碍性贫血。	b	a
急性严重型再生障碍性贫血和慢性型临床表现的区别。	急性型再障：起病急，进展迅速，常以出血、感染和发热为主要首发表现。病初贫血常不明显，但进行性加重。出血重，多数有内脏出血。感染不易控制，易致败血症。病程短暂，常在数月一年内死亡。慢性型再障：起病缓慢，以贫血为主要首发表现。出血多限于皮肤、黏膜，且不严重，内脏出血少见。感染以呼吸道感染为主，容易控制。病程较长，可生存数年。	急性严重型再生障碍性贫血和慢性型再生障碍性贫血的临床表现有所不同，主要体现在症状的严重程度、持续时间以及可能出现的并发症等方面。 急性严重型再生障碍性贫血通常表现为血细胞计数急剧下降，患者可能会出现严重的贫血症状，如面色苍白、头晕、乏力、心悸、呼吸急促等。同时，由于白细胞和血小板数量的显著减少，患者可能会出现感染和出血的风险增加，如皮肤出血、牙龈出血、鼻出血等。这种类型的再生障碍性贫血可能是由急性感染、药物、放射治疗或其他急性疾病引起的。 慢性型再生障碍性贫血的症状相对较为缓和，可能会有长期的贫血、感染和出血倾向。患者可能会感到持续的疲劳、食欲不振、皮肤干燥、头发稀少等。慢性再生障碍性贫血可能是由遗传因素、慢性疾病（如慢性感染、自身免疫性疾病）或长期的药物使用等原因引起的。 在诊断和治疗上，急性严重型和慢性型再生障碍性贫血的区别也很重要。急性严重型可能需要紧急的血液支持治疗，如输血和使用…	急性严重型再生障碍性贫血通常表现为剧烈贫血症状，如严重贫血导致的乏力、头晕、心悸、疲乏等，可能伴有出血倾向，易出现皮肤淤血、鼻衄、月经过多等症状。慢性型再生障碍性贫血则表现为贫血症状渐进，通常症状比较轻微，但持续时间较长，可以伴随出血倾向、感染倾向等。 中医认为再生障碍性贫血是由于脾胃虚弱，气血不足导致的。治疗时需要通过中药调理脾胃，补充气血，同时注意调节饮食，避免劳累过度，保持情绪稳定等。临床上可以应用四物汤、六味地黄丸等中药方剂进行治疗。 .	a	a
再生障碍性贫血的治疗。	避免再接触对造血功能有影响的有害物质对症支持治疗：输血、抗感染等刺激骨髓造血：雄性激素骨髓移植免疫抑制剂：抗胸腺球蛋白、抗淋巴细胞球蛋白、环孢菌素A等造血刺激因子。	再生障碍性贫血是一种由于骨髓功能障碍导致的血细胞生成减少的疾病。中医认为这种疾病可能与肝肾阴虚、脾胃虚弱、气血不足等因素有关。治疗时，中医通常会采用调理脾胃、补肝肾、调和气血的方法。 首先，可以通过调理脾胃，增强脾胃功能，促进血细胞生成。例如，可以服用一些健脾药物，如四君子汤（含有茯苓、白术、炙甘草、桂枝）或健脾丸等。 其次，补肝肾是治疗再生障碍性贫血的重要环节。肝肾两虚会导致血液生成减少，可以通过服用一些补肾药物，如鹿茸、黄芪、杜仲、肉桂等来进行补充。 最后，调和气血也是治疗的关键。可以通过服用一些调血药物，如当归、黄芪、白术等来增强气血，促进血细胞生成。 在中医治疗中，还可能会结合针灸、拔罐、按摩等外治法，以增强治疗效果。同时，患者应注意饮食调理，避免辛辣、油腻等刺激性食物，多吃富含铁质和维生素的食物，以帮助改善贫血症状。 需要注意的是，中医治疗应结合患者的具体体质和病情，且应在专业…	中医认为再生障碍性贫血是由于脾胃虚弱、气血不足、肝肾亏损等多种因素导致的。因此，治疗再生障碍性贫血主要是通过中药调理脾胃、补益气血、滋养肝肾来达到改善贫血症状的目的。常用的中药包括黄芪、当归、熟地黄、白芍等。 此外，中医还强调调节情志、合理饮食和生活作息，对于治疗再生障碍性贫血也是非常重要的。保持心情舒畅、作息规律、合理饮食有助于增强体质，提高机体抵抗力，从而对贫血的康复也有积极的作用。 总的来说，中医治疗再生障碍性贫血是综合调理整个机体的功能，通过药物、饮食、作息等多方面的调节来达到改喗贫血的目的。	tie	tie
缺铁性贫血选择注射铁剂治疗的适应证有哪些？	口服铁剂后有严重消化道反应，无法耐受。消化道吸收障碍：如胃、十二指肠切除术后，胃肠吻合术后，或患有萎缩性胃炎、慢性腹泻等。严重消化道疾病：胃溃疡、十二指肠溃疡或溃疡性结肠炎。妊娠晚期亟待提高血红蛋白而分娩，或失血量较多。不易控制的慢性失血。	注射铁剂治疗是中医中较为特殊的一种治疗方法，主要用于那些口服铁剂治疗效果不佳或难以耐受的患者。以下是一些选择注射铁剂治疗的适应证： 1. 重度贫血：对于重度贫血的患者，由于口服铁剂难以迅速提高血红蛋白水平，注射铁剂可以更快地补充铁元素，提高血红蛋白水平。 2. 铁剂口服不良反应：有些患者可能因为口服铁剂引起胃肠道不良反应，如恶心、呕吐、腹泻等，导致难以坚持长期口服治疗。这种情况下，通过静脉注射铁剂可以避免胃肠道的不良反应。 3. 铁剂吸收不良：某些情况下，患者可能因为胃肠道疾病（如胃溃疡、胃炎等）影响铁的吸收，导致口服铁剂效果不佳。注射铁剂可以绕过胃肠道，直接补充体内铁元素。 4. 急性出血或大出血：在急性出血或大出血的情况下，患者可能需要快速补充铁元素以防止贫血加重。注射铁剂可以迅速提高血红蛋白水平，支持患者的生命体征。 5. 严重的营养不良：营养不良的患者可能因为身体状况差，口服铁剂…	缺铁性贫血是指因机体内铁元素不足而导致的贫血症状。选择注射铁剂治疗的适应证包括：口服铁剂治疗无效或不能耐受；需要快速提高血红蛋白水平或红细胞数量；存在吸收障碍或消化道疾病影响铁元素吸收等情况。注射铁剂可以通过静脉或肌肉注射途径快速有效地补充体内铁元素，提高贫血患者的血液指标。 举例来说，对于孕妇或患有重症贫血的患者，口服铁剂往往效果不佳，此时选择注射铁剂可以更快地改善贫血状况，减轻症状。同时，对于一些患有吸收障碍性疾病的患者，注射铁剂也是一个更可靠的补铁方式。 。	a	a
缺铁性贫血的血象及骨髓象特点。	典型患者表现为小细胞低色素性贫血。红细胞平均体积＜80fl，红细胞平均血红蛋白量＜27pg，红细胞血红蛋白浓度(MCHC)＜32％。成熟红细胞苍白区明显扩大，大小不一。白细胞计数多正常，血小板可正常或轻度减低。幼红细胞增生，中幼红细胞比例增多。幼红细胞核染色质致密，胞质减少， 血红蛋白形成不良，边缘不整齐。骨髓铁染色显示骨髓小粒可染铁消失，铁粒幼红细胞低于 15％。	缺铁性贫血是由于体内铁元素缺乏导致的贫血，其主要特征是红细胞体积减小（微细胞），红细胞数量增加（细胞增多），血红蛋白水平降低。血象和骨髓象的特点如下： 1. 血象： - 红细胞计数（RBC）通常升高，但可能在轻度缺铁时正常。 - 红细胞平均体积（MCV）显著降低，通常小于80 fL，表明红细胞体积减小。 - 血红蛋白（Hb）水平降低，通常小于120 g/L。 - 血红蛋白平均体积（MCH）降低，表明每个红细胞中血红蛋白的平均含量减少。 - 血红蛋白平均体积分布宽度（MCHC）可能正常或略降低。 2. 骨髓象： - 骨髓中红细胞前体细胞（如红细胞原体和早期红细胞）数量增加。 - 骨髓中铁的存储减少，可能表现为骨髓中铁粒细胞数量减少。 - 骨髓中其他细胞线索，如白细胞和血小板的生产通常正常。 在诊断缺铁性贫血时，除了上述血象和骨髓象的检查外，还可能需要进行铁蛋白（Ferritin）和转铁蛋白…	缺铁性贫血的血象特点包括红细胞数量减少，红细胞色素含量降低，红细胞平均体积减小，红细胞平均血红蛋白浓度下降，血红蛋白含量降低，红细胞分布宽度增大。骨髓象特点包括铁粒幼红细胞增多，铁粒幼红细胞比例增高，有核红细胞增多，巨核细胞数量减少。这些特点是缺铁性贫血的诊断依据之一。 举例：患者血象检查显示红细胞数量减少，平均体积减小，平均血红蛋白浓度下降，同时骨髓象检查显示铁粒幼红细胞增多，有核红细胞增多，结合患者的症状和体征，可以初步诊断为缺铁性贫血。	a	a
慢性粒细胞白血病的主要临床特点。	粒细胞显著增多；脾脏明显肿大；胸骨压痛；多数患者有特异性Ph抗体；NAP(-)；病程较缓慢，多因急性变而死亡。	慢性粒细胞白血病（Chronic Myeloid Leukemia, CML）是一种慢性白血病，其主要临床特点包括： 1. **慢性进展**：CML是一种慢性疾病，通常在中老年人中出现，进展缓慢，但如果不治疗，会逐渐恶化。 2. **白细胞计数升高**：患者的白细胞计数会显著升高，尤其是粒细胞计数。白细胞通常在每毫升血液中有4,500到11,000个，但在CML患者中可能超过50万个甚至更高。 3. **骨髓增生**：骨髓中有大量的白血病细胞，这些细胞会逐渐占据正常的骨髓细胞，导致骨髓功能受损。 4. **肿大性**：患者可能会出现肝脏、脾脏和淋巴结的肿大，这是由于白血病细胞的积聚。 5. **贫血和感染**：由于白血病细胞的过度生长，正常的血细胞（如红细胞和血小板）可能会减少，导致贫血和出血倾向。此外，患者免疫系统受损，容易感染。 6. **其他症状**：患者可能会出现乏力、发热、夜间…	慢性粒细胞白血病的主要临床特点包括贫血、出血倾向、感染、体重减轻、乏力等。慢性粒细胞白血病患者体内白细胞增多，这些异常的白细胞无法正常发挥免疫功能，导致患者容易感染。此外，由于异常白细胞的增多，会占据正常造血组织的空间，导致贫血和出血倾向。患者可能会出现瘀斑、鼻衄、牙龈出血等症状。同时，慢性粒细胞白血病患者常感到乏力、体重减轻、食欲不振等全身症状。需要及时就医进行治疗。	a	a
急性白血病的主要表现。	发热和感染、出血及贫血 淋巴结和肝脾肿大，病人常有胸骨下端局部压痛，偶见绿色瘤，中枢神经系统白血病(CNL)其他可有齿龈、皮肤、睾丸浸润表现，心肺肾肠生殖道均可受累。	急性白血病（Acute Leukemia）是一种恶性疾病，主要影响骨髓，导致其产生的血细胞出现异常。其主要表现通常包括： 1. 疲劳和乏力：由于骨髓功能受损，无法正常生产血细胞，导致患者感到极度疲劳和乏力。 2. 发热：患者可能会出现持续性或周期性的发热，这是由于白血病细胞的增殖和骨髓功能障碍引起的。 3. 骨痛：骨髓被白血病细胞侵占，可能导致骨痛，尤其是在脊柱、颅骨和长骨等部位。 4. 出血和淤血：由于血小板数量减少，患者可能会出现皮肤淤血、鼻出血、牙龈出血等症状。 5. 肿大淋巴结：白血病细胞可能会累积在淋巴结，导致淋巴结肿大。 6. 皮肤问题：患者可能会出现皮肤瘙痒、紫癜、水肿等皮肤症状。 7. 呼吸困难：白血病细胞可能累积在肺部，导致呼吸困难。 这些症状可能会迅速恶化，需要及时的医疗干预。中医在治疗急性白血病方面，通常会采用调理气血、补益脾肾、活血化瘀等方法，同时配合西医的化疗、…	急性白血病的主要表现包括贫血、出血、感染等症状。患者可能会出现乏力、乏力、头晕、头痛、发热、骨痛、关节痛、淋巴结肿大等症状。此外，急性白血病患者的白细胞数量增多，但功能异常，无法有效对抗感染，因此容易引起各种感染。在中医的角度上，急性白血病属于“白痢”范畴，治疗上一般会根据患者的体质和症状选用相应的中药进行调理。	a	b
特发性血小板减少性紫癜与过敏性紫癜的鉴别点。	均表现为紫癜，过敏性紫癜多有过敏史，还有关节肿痛、腹痛，亦有血尿、荨麻疹等症状。过敏性紫癜血象中嗜酸粒细胞增多，血小板计数正常, 出血时间、凝血时间均正常，血块退缩正常，血象和骨髓巨核细胞正常。ITP血小板减少，出血时间延长，血块退缩不良，骨髓巨核细胞增多并成熟障碍,PAIgG抗体阳性。	特发性血小板减少性紫癜（ITP）和过敏性紫癜（URTI）是两种不同的血液疾病，它们都可能导致血小板计数降低，从而引起出血倾向和皮肤紫癜。以下是两者的鉴别点： 1. **血小板计数**：ITP患者的血小板计数通常显著降低，通常小于20×10^9/L。相比之下，URTI患者的血小板计数可能正常或轻微降低。 2. **疾病原因**：ITP是一种自身免疫性疾病，身体会错误地攻击并破坏血小板。URTI通常是由过敏反应引起的，可能与药物、食物、环境因素等有关。 3. **临床表现**：ITP患者可能会出现无原因的血小板减少，而URTI患者的血小板减少往往与特定的过敏因素有关联。 4. **实验室检查**：ITP患者的血液检查中可能会发现血小板的平均体积减小（MPV）降低，血小板凝集试验阳性，表明存在自身抗体。URTI患者可能会有其他过敏相关的实验室指标阳性，如IgE水平升高。 5. **治疗反应**…	特发性血小板减少性紫癜与过敏性紫癜在临床上有一些鉴别点。特发性血小板减少性紫癜通常是由于免疫系统异常导致的血小板减少，患者在皮肤和黏膜出现紫癜的同时还会有其他出血表现，如鼻出血、牙龈出血等。而过敏性紫癜则是一种过敏反应引起的皮肤出血性疾病，患者可能会伴随有其他过敏症状，如荨麻疹、呼吸困难等。此外，特发性血小板减少性紫癜的治疗通常需要激素和免疫抑制剂来控制免疫系统的异常，而过敏性紫癜则需要避免接触过敏原，同时可能需要抗过敏药物来缓解症状。 举例来说，特发性血小板减少性紫癜患者可能会在皮肤出现紫癜的同时出现鼻出血，而过敏性紫癜患者可能在接触过敏原后出现皮肤出血并伴有呼吸困难等过敏症状。	b	b
什么是心功能不全	又称心力衰竭，是心血管疾病常见的并发症。当心脏疾病发展到一定程度时，其舒张功能发生障碍，心脏虽有足够的前负荷，排血量仍不能满足机体组织代谢的需要。此时静脉血液回流受阻、脏器淤血，而动脉系统血液供应不足，临床上以肺循环和（或）体循环淤血以及组织血液灌注不良为特征。	心功能不全是指心脏泵血功能减弱，无法有效地将血液泵送到全身的病理状态。它可以分为四个级别：轻度、轻至中度、中度和重度。轻度心功能不全时，心脏仍然能够满足日常生活的需求，但在剧烈运动时可能会感到呼吸困难。中度心功能不全时，患者在日常活动中也会感到呼吸困难，甚至在休息时也可能出现呼吸困难。重度心功能不全时，患者的生命质量受到严重影响，需要定期住院治疗。 心功能不全的原因多种多样，包括心肌病变、心脏结构异常、心律失常、心包炎、心内膜炎、心脏瓣膜病等。治疗心功能不全通常需要综合治疗，包括药物治疗、生活方式的调整、心脏康复训练等。在某些情况下，可能需要手术治疗，如心脏瓣膜手术或心脏移植。 中医对于心功能不全的理解是“心阳虚弱”，认为心脏的功能受到肝郁脾虚、气血不足等因素的影响。中医治疗心功能不全通常采用活血化瘀、补气养阴、强心安神等方法，通过中药、针灸、按摩等手段来调整身体的内环境，提高心脏的功能。	心功能不全是指心脏无法有效地完成泵血和供血的功能，导致心脏无法满足身体的需求。这种情况可能由于心脏肌肉受损、心脏瓣膜问题、心律失常等原因引起。在中医理论中，心功能不全可能与心火过旺、心气不足等因素有关。治疗心功能不全的中医方法包括针灸、中药调理、推拿按摩等，以调整心脏功能，增强心脏健康。 。	tie	b
什么是阵发性夜间呼吸困难?	为左心衰竭的典型表现，常在夜间熟睡后，突然憋醒，被迫坐起，可伴阵咳，咯泡沫痰或呈哮喘状态，称为心源性哮喘。发生阵发性夜间呼吸困难的主要机制可能是：睡眠时的平卧位致使静脉回流增加，膈肌上升，肺活量减少；夜间迷走神经张力增高，支气管发生痉挛而影响呼吸，以及冠状动脉容易收缩而使心肌供血减少等。	阵发性夜间呼吸困难，又称为睡眠呼吸暂停（Sleep Apnea），是一种在睡眠中发生的呼吸暂停现象。这种情况通常会导致患者在睡眠中多次暂停呼吸，这些暂停可能会持续数秒钟到数分钟不等。每次暂停后，患者可能会有强烈的呼吸反应，伴随着打鼾声或打翻身等行为。 睡眠呼吸暂停可能由多种因素引起，包括肥胖、颈部过度肥大、鼻窦炎症、酒精滥用、睡眠位置（侧卧或仰卧）以及某些药物的使用等。这种情况可能会导致患者在白天感到疲劳、注意力不集中、记忆力下降以及情绪波动等问题。 中医认为，睡眠呼吸暂停可能与肺肾两虚、气血不足、痰湿内蕴等体质偏差有关。治疗时，可以通过调整饮食、改善生活习惯、进行适当的运动、使用中药调理气血和润肺止咳等方法来缓解症状。同时，中医还可能会结合针灸、按摩等手段来调整体内气机，促进睡眠质量。	阵发性夜间呼吸困难是指在夜间睡眠中突然发生的呼吸困难症状。这种症状通常是由于气道阻塞、心脏疾病、肺部疾病或者神经系统问题导致的。在中医理论中，阵发性夜间呼吸困难可以与肺气虚弱、心火上炎等病机相关。针对这种症状，中医可以通过调节体内的气血平衡、调理脏腑功能来缓解症状。常用的治疗方法包括针灸、中药调理、推拿按摩等。但在治疗之前，一定要先明确病因，以便进行针对性的治疗。	a	b
什么是心源性哮喘?	为左心衰竭的典型表现，常在夜间熟睡后，突然憋醒，被迫坐起，可伴阵咳，咯泡沫痰或呈哮喘状态，称为心源性哮喘。发生阵发性夜间呼吸困难的主要机制可能是：睡眠时的平卧位致使静脉回流增加，膈肌上升，肺活量减少；夜间迷走神经张力增高，支气管发生痉挛而影响呼吸，以及冠状动脉容易收缩而使心肌供血减少等。	心源性哮喘是一种由于心脏功能障碍导致的呼吸困难症状。这种情况通常发生在心力衰竭的患者中，尤其是那些有心脏衰竭导致左心室功能不全的患者。心脏不能有效地泵血时，血液在肺部可能会积聚，导致肺部过度充血。这种过度充血会刺激支气管平滑肌收缩，从而引起哮喘样症状，如呼吸困难、喘鸣声和咳嗽。 在中医的角度来看，心源性哮喘可能与心脉虚弱、气血不足、肺脉不畅等因素有关。治疗时，可能会采用活血化瘀、补气养阴、调和气血和平衡肺脉等方法。例如，使用一些具有活血化瘀作用的中药，如桃仁、红花、丹参等，以及补气养阴的药物，如黄芪、党参、熟地黄等。同时，调整饮食和生活习惯，如避免过度劳累、保持适当的体重、增加运动量等，也是非常重要的。	心源性哮喘是指由于情绪波动、心理压力等心理因素引起的哮喘发作。在中医理论中，认为情绪的不平衡会导致气机紊乱，从而影响到气道的正常功能，引发哮喘症状。例如，情绪激动、紧张、忧虑等都可能导致气道痉挛，使得哮喘发作。因此，中医治疗心源性哮喘时，除了要调理气血、疏通经络外，还需要调整患者的情绪状态。 举例来说，有的患者在遇到压力大的工作或学习环境时容易发生哮喘发作，这就可能是心源性哮喘的表现。通过中医的治疗方法，可以通过调理体内的阴阳平衡，舒缓情绪，从根本上缓解哮喘症状。	a	a
什么是房室传导阻滞?	房室传导阻滞是指冲动从心房传至心室的过程中发生障碍。按其阻滞的程度，分为3度：Ⅰ度房室传导阻滞为窦性冲动自心房传至心室的时间延长；Ⅱ度房室传导阻滞为窦性冲动中有一部分不能传至心室；Ⅲ度房室传导阻滞（完全性房室传导阻滞）为窦性冲动全部不能传至心室，以致于由阻滞部位以下起搏点来控制心室活动。	房室传导阻滞是指心脏的房室结（连接心房和心室的结构）传导功能障碍，导致心脏的正常节律被打断。这种情况下，心房的电信号不能正常传递到心室，从而影响心脏的正常跳动。房室传导阻滞可能表现为心房颤动（AF），心房扑动（AT）或心房室折返性心动过速等。 在中医理论中，房室传导阻滞可能与心脏的气血运行不畅有关。例如，若肝火过旺或肾阴虚可能导致心脏的气血运行不畅，从而影响心脏的正常节律。此外，情绪压力、饮食不当、睡眠不足等也可能影响心脏的功能。 治疗房室传导阻滞时，中医可能会采用调理气血、平衡阴阳、疏通经络等方法。例如，通过中药治疗来调和心脏的气血，或者通过针灸、按摩等手段来疏通经络，促进气血流通。同时，生活习惯的调整，如保持良好的饮食习惯、适量运动、保证充足睡眠等，也是非常重要的。	房室传导阻滞是指心脏传导系统中房室传导出现问题，导致心脏搏动的传导速度减慢或者传导阻滞。这种情况可能会导致心脏搏动不协调，心率不规律，甚至引起心悸、头晕、乏力等症状。在中医看来，房室传导阻滞可能与心脏的气血运行不畅、心火过旺等因素有关。针对房室传导阻滞，中医通常会采用针灸、中药调理心脏功能，促进心脏的气血运行，达到调整心脏传导系统的目的。	tie	b
什么是高血压脑病?	高血压脑病为血压急剧升高而导致急性、全面性脑功能障碍所引起。血压骤然升高，超过了脑血管自动调节的极限，使脑血管由收缩转为被动性扩张，脑血流量增加，造成过度灌注，血管内液体外渗，出现脑水肿和颅内压升高。患者多突然发病，血压持续和（或）显著升高，出现剧烈头痛、眩晕、恶心、呕吐，甚至视力模糊或一过性失明、失语、抽搐、意识障碍等表现。	高血压脑病，又称急性高血压脑病，是指由于急性高血压导致的脑部功能障碍。它是高血压的一种并发症，通常表现为血压急剧升高，超过180/120mmHg，伴随有头痛、视力模糊、呕吐、恶心、抽搐、意识改变等症状。高血压脑病可能会导致脑水肿、脑出血或脑梗死等严重后果。 在中医理论中，高血压脑病可能与肝火旺、肾阴虚、肝肾阴虚等体质有关。治疗时，中医可能会采用清热泻火、补肾滋阴、调理气血等方法。例如，使用一些具有清热解毒作用的中药，如菊花、黄连等，以及补肾药物如鹿茸、黄芪等。同时，中医还强调调整生活方式，如减少压力、保持适当的运动、均衡饮食等，以帮助控制血压。	高血压脑病是指由于长期高血压引起的一系列脑部病变和症状，包括脑出血、脑梗死、脑疝等。高血压脑病的发生与高血压导致的脑血管病变有关，血压长期升高会使脑血管壁增厚、硬化，从而影响脑血液循环，导致脑部缺血缺氧，最终引发各种脑部病变和症状。 中医认为，高血压脑病是气血失调、肝阳上亢、痰浊内生等导致的病证。治疗高血压脑病的方法主要包括清热利水、活血化瘀、平肝降火等，常用的中药有天麻、丹参、夏枯草等，配合针灸、推拿等中医疗法，能够有效缓解症状、改善病情。 举例来说，针灸穴位风池、合谷等可以调节血压，促进血液循环；中药如丹参可以活血化瘀，改善脑部供血情况。综合运用中医疗法，可以有效帮助患者控制高血压，预防并缓解高血压脑病的发生和发展。 。	a	a
什么是急性心肌梗死?	急性心肌梗死为心肌的缺血性坏死，是在冠状动脉粥样硬化的基础上发生了急性闭塞，导致部分心肌严重而持久性缺血。临床上表现有持续性胸骨后剧烈疼痛，发热，白细胞计数和血清心肌酶增高，以及心电图进行性改变，还可发生心律失常、休克或心功能不全，属于冠心病的严重类型。	急性心肌梗死（Acute Myocardial Infarction, AMI），又称心脏病发作或心肌梗死，是指由于冠状动脉严重狭窄或完全阻塞，导致心肌血液供应中断，引起心肌组织缺血和坏死的急性病理状态。这种情况通常由动脉粥样硬化导致的血栓形成或栓子脱落引起。 在中医理论中，急性心肌梗死可能与“心阳虚”、“气血瘀滞”等症候相关。患者可能会出现胸痛、气短、心悸、出汗、面色苍白等症状。中医治疗通常会采用活血化瘀、补益心脏、调和气血等方法，可能包括中药治疗、针灸、按摩等。	急性心肌梗死是指心脏的冠状动脉突然发生阻塞，导致心肌缺血、缺氧、甚至坏死的严重疾病。通常会出现剧烈的胸痛、呼吸困难、恶心、呕吐等症状。中医认为急性心肌梗死属于心痹范畴，主要是由于情志内伤、饮食不节、劳累过度等原因导致心脏气血运行不畅，形成痹阻。治疗上，中医会根据患者的具体情况，采用活血化瘀、通络舒筋的方法来缓解症状、促进心肌修复。	a	a
什么是再生障碍性贫血?	再生障碍性贫血简称再障，是由多种病因引起，以造血干细胞数量减少和质的缺陷为主所致的造血功能障碍，导致红骨髓总容量减少，代以脂肪髓，骨髓中无恶性细胞浸润，无广泛网硬蛋白纤维增生，临床以全血细胞减少为主要表现的一组综合征。患者常表现较重的贫血、感染和出血。	再生障碍性贫血是一种罕见的疾病，属于骨髓衰竭性疾病。它的特点是骨髓中造血干细胞的功能受损，导致红细胞、白细胞和血小板的生成减少。这种情况下，患者会出现贫血、感染和出血倾向等症状。 在中医的角度来看，这种疾病可能与肾脏功能不足、气血不足或者脾胃虚弱等因素有关。例如，如果患者的肾阳虚弱，可能会导致造血功能受损；如果脾胃虚弱，可能会影响营养物质的吸收和利用，从而影响血液生成。治疗时，中医可能会采用温补肾阳、补气养血、健脾益血等方法。	再生障碍性贫血是一种由于骨髓功能受损导致红细胞、白细胞和血小板数量减少的疾病。根据中医理论，再生障碍性贫血可以被视为气血两亏的表现，主要是由于脏腑功能失调、气血运行不畅引起的。中医治疗再生障碍性贫血主要是调养脏腑、益气养血，常用的治疗方法包括中药调理、针灸、艾灸等。 举例来说，有些中药药方如四物汤、当归补血汤等可以起到益气养血、调理气血的作用。针灸和艾灸可以通过刺激穴位、促进气血流通来调理脏腑功能。综合运用这些方法可以帮助患者改善再生障碍性贫血的症状，并提高身体的免疫力。 。	a	a
什么是白血病?	是一类造血干细胞的克隆性恶性疾病。克隆中的白血病细胞增殖失控、分化障碍，凋亡受阻而停滞在细胞发育的不同阶段，在骨髓及其他造血组织中白血病细胞大量增生聚集，并浸润其他器官和组织，而正常造血受到抑制。临床以发热、贫血、出血为主要表现，并伴有不同程度的肝、脾和淋巴结肿大。	白血病是一种骨髓瘤病，主要影响血液系统。它是由骨髓中的血细胞生产异常增多，导致正常血细胞比例下降，影响身体的正常功能。白血病的特点是白血球数量显著增加，其中大多数是未成熟的细胞，这些异常细胞无法正常地进行血液循环和氧气输送。 在中医的观点中，白血病可能与体内“气血”和“津液”的失调有关。例如，气血不足或津液亏耗可能导致体内的正常细胞生产受阻，进而可能导致白血病的发生。中医治疗白血病通常会采用调理气血、补充津液、活血化瘀等方法，同时结合中药治疗和针灸、按摩等辅助疗法。	白血病是一种由于骨髓内白血细胞恶性增生导致的恶性肿瘤性疾病。在中医的角度上，白血病可以被解释为体内的气血失调、肝肾虚弱等多种因素导致的病理变化。中医治疗白血病通常会通过调节体内的气血、养肝肾等方法来帮助恢复机体的平衡状态。	a	a
什么是类白血病反应?	感染、组织损伤、肿瘤浸润等均可刺激骨髓引起中性粒细胞增多。当白细胞计数＞25×109／L～30×109／L，以成熟的中性粒细胞为主，同时血中可出现中幼粒和晚幼粒细胞时，即称中性粒细胞类白血病反应。一般无明显贫血及出血；骨髓各系细胞形态及比例无明显异常；白细胞碱性磷酸酶活力显著增高。	类白血病反应，又称为白血病样反应，是一种非白血病性的骨髓增殖性疾病。它的特点是骨髓中多种血细胞前体细胞的异常增殖，导致血细胞计数显著升高，类似于白血病的临床表现。这种反应通常是身体对严重疾病、创伤、感染或其他压力刺激的一种反应。 在类白血病反应中，骨髓的正常功能可能会受到影响，可能会出现贫血、出血倾向或其他血液系统的功能障碍。这种情况需要及时的医疗干预，包括对症治疗和减轻骨髓压力的措施。 例如，某些患者在严重感染后可能会出现类白血病反应，血液检查可能显示白细胞计数显著升高，但通过进一步的检查可以排除白血病的可能性。	类白血病反应是中医术语，指的是患者在接受中医治疗时出现类似白血病症状的一种反应。在中医治疗过程中，有时会出现患者体内毒素排泄加速，导致白细胞数量暂时增多，类似于白血病的症状表现。这种现象在中医治疗中被认为是正常的疗效反应，通常不需要特殊处理，随着治疗的进行，这种反应会逐渐减轻。 举例来说，有些患者在接受中药治疗过程中可能会出现全身乏力、发热、淋巴结肿大等类似白血病的反应，但经过一段时间的调理和治疗后，这些症状会逐渐消失。这种类白血病反应实际上是患者身体在调整和排毒的过程中的正常反应。 。	a	a
什么是甲亢危象?	甲状腺危象是甲亢恶化时的严重表现。主要诱因为感染、手术、放射性碘治疗等应激状态。临床见高热（>39℃）、心率快（140～240次／分）、烦躁不安、大汗淋漓、厌食、恶心、呕吐、腹泻，继而出现虚脱、休克、嗜睡或谵妄，甚至昏迷。部分可伴有心力衰竭、肺水肿，偶有黄疸。白细胞总数及中性粒细胞常升高。血T3、T4升高，TSH显著降低，	甲亢危象是指甲状腺功能亢进症（简称甲亢）患者出现的一种急性恶化状态，表现为心动过速、心悸、呼吸急促、出汗、食欲减退、体重减轻、情绪波动、肌肉无力、视力模糊、心律失常等症状，且症状迅速加重，可能导致生命危险。这种情况需要立即就医，通常需要紧急治疗，如使用抗甲状腺药物、β受体阻滞剂、皮质类固醇等。	甲亢危象是指由于甲状腺功能亢进导致的急性并发症，表现为心动过速、高热、精神紊乱、呕吐、腹泻等症状。在中医理论中，甲亢危象可以归为“热病”范畴，属于阳明热盛证的范畴。治疗甲亢危象时，中医会根据病情的具体表现采取清热解毒、平肝潜阳或者清利湿热等方剂治疗。同时，还会结合针灸、艾灸等中医疗法进行调理。 。	a	a
什么是糖尿病酮症酸中毒?	糖尿病患者在病程中出现的严重代谢紊乱。由于脂肪加速分解，造成其代谢产物大量增多，产生大量酮体，并有代谢性酸中毒，高血糖。常常有严重脱水，可造成循环和肾功能衰竭。	糖尿病酮症酸中毒（Diabetic Ketoacidosis, DKA）是一种严重的并发症，主要发生在1型糖尿病患者中，但也可能在2型糖尿病患者中出现，尤其是在没有足够治疗的情况下。它是由于身体缺乏胰岛素而产生的，胰岛素是调节血糖水平的关键激素。当胰岛素水平低于正常水平时，身体开始分解脂肪以获取能量，这个过程会产生酮体。 酮体是一种酸性物质，当它们在体内积累时，会导致血液pH值下降，引发酸中毒。DKA的典型症状包括严重的脱水、口渴、多饮、多尿、疲劳、恶心、呕吐和呼吸急促。严重的情况下，患者可能会出现意识模糊甚至昏迷。 治疗DKA通常包括静脉注射胰岛素、补充水分和电解质，以及监测血糖和血液pH值。早期诊断和治疗对于预防并发症至关重要。例如，未经治疗的DKA可能导致心脏问题、肾衰竭甚至死亡。 在中医的角度看，糖尿病酮症酸中毒可能与肝肾阴虚、脾胃虚弱等体质有关。中医治疗可能包括调理脾胃、补肾阴…	糖尿病酮症酸中毒是糖尿病患者在血糖控制不当或出现严重感染等情况下产生的一种严重并发症。当血糖过高时，机体无法充分利用血糖作为能量来源，转而开始分解脂肪来提供能量，产生大量酮体。当体内酮体过多时，会导致血液变酸，出现酮症酸中毒的症状，如呼吸深快、口渴、尿频等。中医认为糖尿病酮症酸中毒属于糖尿病的并发症，治疗上应当积极控制血糖，调整饮食结构，避免过度饮食甜食，保持规律的生活作息。同时中医药也可以辅助治疗，如服用一些具有降血糖作用的中药或采用针灸等方法来调节体内的阴阳平衡。但是在治疗糖尿病酮症酸中毒时，还是应当优先进行现代医学的治疗，包括紧急补液、胰岛素治疗等。 .	tie	a
什么是类风湿因子?	类风湿性关节炎是以关节滑膜损害为主要病变的自身免疫性疾病。患者体内产生大量免疫球蛋白，其中包括了类风湿因子，主要有IgG型和IgM型。因此类风湿因子实际上是免疫球蛋白。	类风湿因子（Rheumatoid Factor, RF）是一种抗体，它在体内通常用来识别和清除体内的其他抗体。然而，在某些情况下，类风湿因子可能会错误地攻击身体的健康组织，特别是关节软骨和关节周围的组织。这种情况下，类风湿因子被认为与类风湿关节炎（Rheumatoid Arthritis, RA）等自身免疫性疾病有关。 在中医的观点中，类风湿关节炎可能与体内湿邪或风邪的侵袭有关。湿邪可能导致关节疼痛和肿胀，而风邪则可能导致关节活动受限和疼痛。中医治疗可能包括使用温经散寒、活血化瘀、利水渗湿等方法来缓解症状。	类风湿因子是一种抗核抗体，是类风湿性关节炎的一个重要血清学指标。它是一种自身免疫反应产生的抗体，主要针对自身的关节组织，导致关节炎的发生。类风湿因子的检测可以帮助医生进行类风湿性关节炎的诊断和监测疾病的活动性。一般情况下，类风湿因子的正常值为阴性，但在患有类风湿性关节炎等风湿性疾病的患者体内会产生较高水平的类风湿因子。因此，类风湿因子的检测对于早期发现和治疗类风湿性关节炎具有重要意义。	tie	a
何谓主动转运？有何特点？	指细胞膜通过本身的能量消耗，将物质逆电-化学梯度进行转运的过程。主要特点是需要额外供能，介导主动转运的膜蛋白本质上也属于载体，能与被转运物质特异性结合。	在中医理论中，主动转运是指药物或治疗手段能够通过自身的活力作用，促进药物或治疗原理在人体内的有效转运和利用。这种转运方式与被动转运相对，被动转运是指药物或治疗原理依赖于外界条件（如温度、湿度等）来促进其在人体内的分布和作用。 主动转运的特点主要包括： 1. 自身活力：药物或治疗手段具有自身的活力，这种活力能够促进药物在人体内的有效转运和利用。 2. 适应性强：主动转运的药物或治疗手段能够根据个体的具体情况调整其作用方式，以达到最佳的治疗效果。 3. 安全性高：由于药物或治疗原理能够根据人体的反应进行调整，因此在治疗过程中相对安全，不易产生不良反应。 4. 效果持久：主动转运的药物或治疗手段能够在人体内持续作用，促进身体的自我恢复和调节。 例如，中药材中的活性成分如黄芪、丹参等，具有活血化瘀、补气健脾的主动转运作用，它们能够根据人体的具体情况，通过自身的活力促进血液循环，增强脾胃功能，从而…	主动转运是中医术语，指的是在治疗过程中，医师对患者进行一系列的引导和教育，使患者在日常生活中能够主动地调整饮食、作息、情绪等方面的因素，从而促进疾病康复和身体健康。主动转运的特点包括： 1. 个性化定制：主动转运强调因人而异，根据患者的具体情况和诉求，制定个性化的养生方案，使患者更容易接受和坚持。 2. 综合治疗：主动转运不仅注重药物治疗，还包括饮食调理、运动锻炼、情绪调节等多方面的干预措施，综合治疗效果更佳。 3. 强调预防：主动转运不仅关注疾病治疗，更强调疾病的预防，通过调整生活方式和养成良好的生活习惯，减少疾病的发生风险。 4. 持续性维护：主动转运不仅是一次性的治疗，而是一个长期的过程，医师和患者需要保持沟通和合作，持续进行健康管理和调整。 举例来说，对于患有高血压的患者，主动转运的治疗方案可能包括控制钠盐摄入、增加运动量、保持心情舒畅等方面的建议，患者需在医师的指导下积极调整生…	a	tie
简述阈强度与阈电位的区别。	阈强度：在刺激的持续时间和强度-时间变化率固定的情况下，能够引起可兴奋细胞产生兴奋的最小刺激强度。阈电位：能够引起膜对钠离子通透性突然增大并产生动作电位的临界膜电位称为阈电位。	很抱歉，但根据您提供的问题，阈强度与阈电位并不属于中医的范畴，而是生物电学和神经科学的概念。阈强度通常指的是刺激某一神经或肌肉时所需的最小强度，而阈电位则是指在神经元或肌肉细胞上产生动作电位所需的最小电位变化。 如果您有其他关于中医的具体问题，我会很乐意提供帮助。例如，您可以询问关于中医诊断方法、治疗原则、常见疾病的中医治疗方法等。请随时提出相关问题。	阈强度是指神经元兴奋所需的最低电压强度，可以引发神经元的动作电位。而阈电位是指神经元膜内外电位之间的差值达到一定数值时，神经元才会产生动作电位传递信号。简单来说，阈强度是刺激神经元所需的电压强度，而阈电位是神经元内外电位达到的临界值。 举例来说，如果一个神经元的阈强度为20mV，那么只有当外部刺激电压达到20mV时，这个神经元才会被激活产生动作电位。而阈电位则是指神经元膜内外电位的差值达到一定数值时，神经元才会传递信号。	tie	b
何谓“全或无”定律？	如果给予可兴奋细胞的刺激强度太小，不能引起动作电位；一旦刺激强度达到阈值时，就能引起一个幅度最大的动作电位，继续增加刺激强度，动作电位的幅度也不会增大。	在中医理论中，“全或无”定律是指某些治疗方法或药物在治疗过程中往往需要达到一定的剂量或强度，才能产生预期的治疗效果。如果剂量过小或过弱，可能无法达到治疗目的；反之，如果剂量过大或过强，可能会产生副作用甚至损害健康。这个定律强调了治疗的量变与质变的关系，要求医生在治疗时要精确掌握药物的用量和治疗的强度，以达到最佳的治疗效果。 例如，在中药治疗中，某些药物需要达到一定的浓度才能发挥其治疗作用。如果剂量不足，可能无法有效治疗疾病；如果过量，可能会引起不良反应。因此，中医医生在开具药方时，会根据患者的具体情况和病情的严重程度，精确计算药物的用量，以确保治疗的安全性和有效性。	“全或无”定律是中医理论中的一个重要概念，指的是人体脏腑之间的相互联系和影响。即在疾病发展过程中，某一脏腑出现病变时，会影响到其他相关脏腑的功能，表现为全身症状或者没有任何症状。这个定律强调了脏腑之间的密切联系，也说明了中医治疗疾病时需要综合考虑整体情况，而不是只关注某一个部位。 举例来说，中医认为肝主疏泄，如果肝气郁结导致肝病，就会出现头晕、眩晕、胸闷等全身症状。反之，有时候肝病患者可能并不明显出现肝脏的症状，而是表现为消化不良、失眠等问题。这就是“全或无”定律的体现。 。	a	tie
何谓局部反应？并简述其特点。	去极化效应增大的膜电位改变称为局部反应，局部反应未到达阈值电位水平，因而不能爆发动作电位。特点：不符合“全或无”定律；电紧张方式扩布。髓传导距离增加，局部反应的幅度逐渐减小以至消失；总和现象。局部反应可以叠加，没有不应期。	局部反应是指在中医治疗过程中，针对特定部位进行针灸、拔罐、刮痧、敷贴等治疗手段后，出现的一些临时性的症状或体征。这些反应通常是身体对治疗刺激的一种正常反应，属于治疗过程中的正常生理反应。 局部反应的特点主要包括： 1. 位置特异性：局部反应通常只限于治疗的部位，不会扩散到身体的其他部位。 2. 时间性：局部反应通常是暂时性的，一般在治疗后不久出现，随着身体恢复平衡而逐渐消失。 3. 可逆性：局部反应通常是可逆的，即在治疗结束后，身体会自行恢复到正常状态。 4. 治疗相关性：局部反应与治疗手段和治疗目的有关，通常是治疗过程中的正常现象。 举例来说，针灸治疗时可能会出现针灸点红、肿、痛等局部反应，这些反应通常是因为针灸刺激了局部的经络和穴位，促进了血液循环和气血流通，具有治疗效果。	局部反应是指在中医治疗过程中，患者在接受治疗后局部出现的一系列生理变化和症状反应。这些反应通常是正常的治疗过程中所产生的生理反应，表明患者的病情在得到改善。局部反应的特点包括局部皮肤温度升高、局部红肿、疼痛或刺痛感、局部出现淤血等。这些反应通常是因为治疗刺激导致身体的血液循环加快，病灶处的毒邪排出，从而引起的正常生理反应。 举例来说，比如在针灸治疗中，患者可能会在针刺部位感到一些刺痛感，这是因为针刺刺激了经络，促进了局部的血液循环，有助于排除体内的病邪，从而产生的正常反应。		tie
何谓血液凝固？简述血液凝固的基本过程？	血液凝固指血液由流动的液体状态变成不能流动的凝胶状态的过程。根据凝血酶原激活物形成的途径不同，分为内源性凝血和外源性凝血。血液凝固的过程基本可以分为凝血酶原激活物的形成、凝血酶（FIIa）形成和纤维蛋白（FI）形成3个阶段。	血液凝固是血液从液态转变为凝固状态的过程，这个过程对于维持生命至关重要，因为它有助于止血并防止过多的血液流失。血液凝固的基本过程可以分为三个阶段：血小板聚集、纤维蛋白网形成以及血液凝块的稳定。 1. 血小板聚集：当血管受损时，血液会接触到外界环境，释放出化学物质如腺苷等，这些物质会激活血小板，使其聚集到损伤处。血小板聚集形成血栓的初步结构。 2. 纤维蛋白网形成：血液中含有血小板内的凝血因子，当血小板聚集后，会释放这些凝血因子。这些凝血因子在血液中的其他蛋白质，如凝血酶原，经过一系列的激活和转化，最终形成了纤维蛋白原。随后，通过血液中的激活剂，如凝血酶，纤维蛋白原被转化为纤维蛋白，形成了一个三维的网状结构。 3. 血液凝块的稳定：在纤维蛋白网形成后，血液凝块变得更加稳定。血小板继续聚集并释放更多的化学物质，进一步增强血液凝块的稳定性。同时，血液中的凝血因子也继续被激活，形成更多的纤维蛋白…	血液凝固是机体在遭受外伤或血管受损时，通过一系列复杂的生理反应而使血液凝结成块的过程。血液凝固的基本过程包括：血管受损后血小板黏附和聚集形成血栓；血小板释放血小板活化因子，促使纤维蛋白原转化为纤维蛋白，形成纤维网；最后，纤维蛋白网和血小板一起形成血栓，止血完成。 举例来说，如果一个人被刀割伤了手指，血管受损后，血小板就会迅速黏附在受损处，形成血栓，同时释放血小板活化因子，促使纤维蛋白原转化为纤维蛋白，最终形成血块，停止出血。 。	a	a
白细胞的分类及百分比？	白细胞分为颗粒细胞和无颗粒细胞。颗粒细胞分为中性粒细胞（50%～70%）；嗜碱性粒细胞（0～1%）；嗜酸性粒细胞（0.5～5%）。无颗粒细胞分为单核细胞（3%～8%）；淋巴细胞（20%～40%）。	白细胞是人体免疫系统的重要组成部分，主要分为两大类：中性粒细胞、淋巴细胞、单核细胞（包括中性粒细胞、淋巴细胞和单核细胞的百分比通常在正常范围内，具体百分比会根据不同的实验室标准有所不同，但一般中性粒细胞在4.5%到70%之间，淋巴细胞在20%到50%之间，单核细胞在3%到12%之间）。 中性粒细胞是最常见的白细胞类型，通常在感染或炎症时数量增加。它们的主要功能是吞噬和消化病原体。淋巴细胞则是免疫系统的关键组成部分，负责识别和消灭病毒、细菌和癌细胞。单核细胞则在吞噬和处理外来物质方面起着重要作用，并在成熟后转化为巨噬细胞。 在中医理论中，白细胞计数并不是直接用于诊断疾病的，但它可以作为辅助指标，帮助医生评估患者的整体健康状况和免疫力。例如，白细胞计数升高可能表明有感染或炎症的情况，而降低则可能与免疫系统受损或其他严重疾病有关。	白细胞是免疫系统中的一种重要细胞，主要分为中性粒细胞、淋巴细胞、单核细胞、嗜酸性粒细胞和嗜碱性粒细胞。它们在人体内的比例通常是中性粒细胞占50-70%，淋巴细胞占20-40%，单核细胞占2-8%，嗜酸性粒细胞占1-3%，嗜碱性粒细胞占0.5-1.5%。 举例来说，如果一个人的白细胞分类及百分比是：中性粒细胞60%，淋巴细胞30%，单核细胞5%，嗜酸性粒细胞3%，嗜碱性粒细胞2%，那么这个人的白细胞分布就是这样的。	b	b
简述ABO血型系统的血型抗原和血清抗体的种类和分型依据。	血型抗原：A型—红细胞膜上只含有A凝集原,B型—红细胞膜上只含有B凝集原,AB型—红细胞膜上既有A凝集原又有B凝集原,O型—红细胞膜上既无A凝集原又无B凝集原.血清抗体：A型血的血浆中只含有抗B凝集素,B型血的血浆中只含有抗A凝集素,AB型血的血浆中既没有抗A也没有抗B凝集素,O型血的血浆中含有抗A和抗B两种凝集素.	ABO血型系统是根据红细胞表面上的特定抗原（血型抗原）和相应的抗体（血清抗体）来分型的。这个系统主要包括四种血型：A、B、AB和O。 1. 血型抗原：每种血型的红细胞表面都有特定的抗原。A型红细胞表面有A抗原，B型红细胞表面有B抗原，AB型红细胞表面同时有A和B抗原，而O型红细胞表面没有A或B抗原。 2. 血清抗体：每个个体的血清中都含有针对非自身血型抗原的抗体。A型个体的血清中含有针对B抗原的抗体，B型个体的血清中含有针对A抗原的抗体，AB型个体的血清中不含有针对A或B抗原的抗体，而O型个体的血清中含有针对A和B抗原的抗体。 在中医中，虽然没有直接的证据表明血型与人体的健康状况直接相关，但某些理论认为不同血型的人可能对特定的饮食和生活方式有不同的适应性。例如，A型血的人可能更适合吃清淡的食物，而B型血的人可能更适合吃富含蛋白质的食物。然而，这些观点并没有得到广泛的科学证据支持。	ABO血型系统是根据人类红细胞表面的不同抗原而划分的。根据ABO血型系统的抗原和抗体的种类和分型依据，我们可以将人类血型分为A型、B型、AB型和O型四种。在ABO血型系统中，A、B、AB和O代表不同的抗原。A型血液含有A抗原，B型血液含有B抗原，AB型血液同时含有A和B抗原，而O型血液不含有A或B抗原。 在ABO血型系统中，人体血清中存在着相对应的抗体。A型血液中含有针对B抗原的抗体，称为抗B抗体；B型血液中含有针对A抗原的抗体，称为抗A抗体；AB型血液中不含有任何抗体；而O型血液中含有同时针对A和B抗原的抗体，称为抗A和抗B抗体。 根据ABO血型系统的血型抗原和血清抗体的种类和分型依据，我们可以确定一个人的血型类型，这对于输血和器官移植等医疗过程至关重要。	tie	tie
何谓心力储备?其构成如何？	心泵血功能的储备称为心力储备，是指心输出量能髓机体代谢需要而增加的能力。心力储备分为心率储备和搏出量储备。动用心率储备是提高心输出量的主要途径，搏出量储备以动用收缩期储备为主，舒张期储备相对次要。	心力储备是指人体在面对外界压力、疾病或其他挑战时，心脏和心血管系统能够承受的最大负荷量。它反映了心脏的适应性和功能能力。心力储备的构成主要包括以下几个方面： 1. 心脏的结构和功能：心脏的大小、肌肉厚度、心室的收缩力等都影响心力储备。例如，心肌的肥厚可以增加心脏的泵血能力，提高心力储备。 2. 血管的弹性和适应性：血管的弹性和适应性决定了血液在心脏泵血时的压力和流量。良好的血管弹性可以减少心脏的负担，提高心力储备。 3. 心脏的神经调控：心脏的自主神经调控（交感和副交感神经系统）对心脏的功能有重要影响。良好的神经调控机制可以帮助心脏在压力下更好地工作。 4. 心脏的代谢能力：心脏的能量供应和代谢能力也是影响心力储备的重要因素。心脏能够有效利用氧气和葡萄糖来产生能量，支持其持续工作。 5. 心脏的修复和再生能力：心脏的修复和再生能力决定了心脏在受到损伤后恢复功能的能力。良好的修复能力有助于…	心力储备是中医学中一个重要的概念，指的是人体心脏对外界刺激和负荷的适应能力，也可以理解为心脏的功能储备量。心力储备的构成主要包括心脏的收缩力、舒张力、心排血量、心脏的兴奋性和传导性等方面。在中医理论中，心力储备与人体的气血运行、心脏的功能状态以及情志调节等密切相关。 举个例子，如果一个人长期处于高压工作环境下，精神紧张导致情绪不稳定，可能会导致心力储备下降，出现心悸、胸闷等症状。而通过中医调理，可以通过调整饮食、情志调节、针灸等方法来增强心力储备，从而改善心脏功能。 。	tie	tie
第一心音和第二心音的产生时期、心音特点及意义。	第一心音：发生在心室收缩期之初，房室瓣关闭；音调较低，持续时间较长；标志着心室收缩的开始。第二心音：发生在舒张期之初，动脉瓣关闭；音调较高，持续时间较短；标志着舒张期的开始。	第一心音（S1）和第二心音（S2）是心脏收缩时产生的声音，它们的产生时期、心音特点及意义在中医中也会有所体现，尽管中医更侧重于气血和经络的平衡。 第一心音（S1）产生时期大约在心室收缩开始时，心房关闭时产生。这个声音较为清晰，强烈，通常与心房收缩结束和心室开始收缩有关。在中医的观点中，心脏是“君主之官”，与心神的调节有关。第一心音的清晰与否可能反映心脏功能的强弱，心神的平静与否。 第二心音（S2）产生时期大约在心室收缩结束和心房开始收缩时产生。这个声音通常比第一心音稍微弱一些，分为两个部分：心室关闭的声音（P2）和心房关闭的声音（A2）。在中医中，心脏的功能与气血的运行密切相关。第二心音的强弱可能反映心脏的气血状态，以及心脏与其他脏腑的相互关系。 在中医诊断中，通过听诊可以了解心脏的功能状态，包括心音的强弱、清晰度、节律等。例如，如果第一心音过于清晰而第二心音减弱，可能表明心脏气血不足，…	第一心音和第二心音是由心脏收缩和舒张时心瓣膜关闭所产生的声音。第一心音产生于心脏收缩时，主要是由心脏的二尖瓣和三尖瓣关闭造成的，其音调低沉、浊响；第二心音产生于心脏舒张时，主要是由主动脉瓣和肺动脉瓣关闭造成的，其音调较高、清晰。 第一心音和第二心音的产生时期、心音特点及意义对判断心脏功能和疾病的情况至关重要。通过仔细观察和听诊心音，可以判断心脏收缩和舒张功能是否正常，是否存在心脏瓣膜病变、心肌炎症等疾病。比如，如果第一心音变得异常强壮或者第二心音出现分裂现象，可能提示心脏瓣膜存在问题；如果第一心音和第二心音之间的时间间隔缩短，可能提示心室肥大等情况。 总的来说，对第一心音和第二心音的产生时期、心音特点及意义的了解可以帮助医生对患者的心脏健康状况进行评估和诊断。	b	b
何谓房室延搁？有何生理意义？	房室交界传导兴奋的速度缓慢，兴奋在这里延搁一段时间，称为房室延搁。房室延搁使心室在心房收缩完毕之后才开始收缩，当心房收缩时，心室处于舒张状态，故心房收缩可将其中的血液进一步挤入心室，使心室获得最大的充盈，有利于心室射血。	房室延搁是指心脏在其收缩期（房室交界期）出现的延迟现象。在正常情况下，心房收缩结束后，心室应该在大约0.12秒内开始收缩。然而，在房室延搁的情况下，这个时间延长，通常超过0.16秒。这种延迟可能会导致心室充盈不足，进而影响心脏的泵血功能。 生理意义上，房室延搁可能会导致心室的预充盈减少，影响心脏的泵血效率。长期的房室延搁可能与心脏功能不全有关，尤其是左心室功能不全。因此，房室延搁在中医中可能被视为心脏阴虚火旺或气血不足的体征，需要通过调整饮食、生活习惯和适当的中药治疗来缓解。	房室延搁是中医术语，指的是心脏的房室传导延迟或阻滞，导致心房和心室之间的电信号传导受阻。这会导致心脏节律失常，如房室传导阻滞、心动过缓等。 房室延搁在生理上是有一定意义的，它可以帮助心脏维持合适的心率和心律。当心脏受到一些外界因素的干扰时，房室延搁可以调节心脏的节律，保证心脏的正常功能。但是如果房室延搁过于严重或持续时间过长，就会影响心脏的正常收缩和舒张，导致心脏功能受损，甚至引发心律失常等严重问题。 举例来说，房室传导阻滞是一种比较常见的心律失常，如果出现症状严重或持续时间过长，就需要及时就医进行治疗。 .	a	a
简述机体排泄的途径？	呼吸器官：以气体的形式，排出CO2、少量水分。皮肤：以不感蒸发和汗液，排出水分、少量氯化钠和尿素。消化道：随粪便排出胆色素的无机盐。肾：以尿液的形式，排出大部分代谢产物、水分、无机盐和有机物。	机体排泄是指身体通过各种途径清除废物、毒素和不需要的物质的过程。中医认为，人体有“五行”平衡理论，即木、火、土、金、水五种元素的平衡与否直接关系到人体的健康。排泄系统是维持这一平衡的重要途径。 人体的排泄途径主要包括以下几个部分： 1. **肺**：通过呼吸排出二氧化碳和其他有害气体。中医认为，肺主气，负责调节呼吸和气血的运行，若肺功能不佳，易导致体内毒素积聚。 2. **大肠**：负责排出体内的废物和未被吸收的食物残渣。中医认为，大肠主纳，负责水谷之精的吸收和排泄，若大肠功能失调，易导致体内水湿不化。 3. **膀胱**：通过尿液排出体内的废物和多余的水分。中医认为，膀胱主液，负责调节水液的代谢，若膀胱功能失常，易导致水湿内蕴。 4. **皮肤**：通过汗液排出体内的废物和热量。中医认为，皮肤主汗，负责调节体温和排出体内的毒素，若皮肤功能不佳，易导致体内热毒蕴积。 5. **耳、鼻、口…	机体排泄的途径主要包括尿液、大便、汗液和呼吸四种途径。其中，尿液主要通过肾脏将体内废物和代谢产物排泄出体外；大便通过肠道将消化后的残渣和有害物质排出体外；汗液则通过皮肤的汗腺排泄出体外，帮助调节体温和排除部分代谢废物；呼吸则通过肺部将二氧化碳排出体外。这些排泄途径协同工作，保持机体内环境的平衡和稳定。 举例来说，如果肾脏功能受损，可能会导致尿液排泄不畅，进而影响体内废物的排除，导致体内毒素积聚。这时就需要中医调理肾气，促进肾脏功能恢复，以帮助机体正常排泄废物。	b	b
简述影响肾小球滤过的因素？	有效滤过压是滤过的动力。肾小球毛细血管血压下降，滤过率下降；血浆胶体渗透压降低，滤过率上升；肾小囊内压降低，滤过率上升。滤过膜通透性和面积是滤过的结构基础。滤过膜通透性改变：孔径增大、负电荷水平下降可引起滤过率上升；膜面积下降，滤过率下降。	影响肾小球滤过的因素主要包括血压、血液蛋白浓度、肾小球的血管通透性以及肾小球的结构和功能等。高血压是最主要的因素之一，因为它可以导致肾小球血管壁的损伤，增加滤过压力，从而影响肾小球滤过功能。血液蛋白浓度的增加也会增加对肾小球滤过的阻力，降低滤过效率。肾小球的血管通透性改变也会影响物质的滤过。另外，肾小球的结构和功能损害，如肾炎、糖尿病肾病等，也会直接影响肾小球滤过的能力。	影响肾小球滤过的因素有很多，主要包括以下几个方面： 1. 血流量：肾小球滤过的主要动力是肾小球内的血流量，血流量增加会促进滤过率的提高，血流量减少则会导致滤过率下降。 2. 肾小球滤过膜的通透性：滤过膜的通透性受到肾小球毛细血管内皮细胞、基底膜和足细胞的影响，如果这些结构受损，就会影响滤过率。 3. 血浆胶体渗透压：血浆胶体渗透压增加会导致滤过率降低，而降低则会增加滤过率。 4. 血管舒缩调节：交感神经系统、肾素-血管紧张素系统等因素会影响肾小球的收缩和扩张，进而影响滤过率。 5. 肾小管重吸收：肾小管对滤过的物质进行再吸收，如果再吸收功能受损，也会影响滤过率。 举例：高血压患者由于血流量增加，也会影响肾小球的滤过率。 。	b	b
简述眼睛屈光不正的原因及矫正方法。	近视：原因：眼球前后径过长（轴性近视），或晶状体曲率过大、折光力过强（屈光性近视）导致物像成在视网膜之前。矫正：用凹透镜，使入眼的平行光线适当分散，成像于视网膜。远视：原因：眼球前后径过短（轴性远视），或晶状体曲率过小、折光力过弱（屈光性远视）导致物像成在视网膜之后。矫正：用凸透镜，使物像成于视网膜。散光：原因：眼的折光表面不呈正球面，导致折光表面不同方位的曲率半径不同，一般是垂直方位的曲率大于水平方位的曲率。矫正：用圆柱形透镜，使曲率异常得到纠正。	眼睛屈光不正，也称为视网膜屈光不正，是指眼睛内的屈光系统（包括晶状体、角膜等）不能正确地将光线聚焦在视网膜上，从而导致远视、近视、散光或屈光不正等视力问题。中医认为，屈光不正与五脏六腑的功能失调有关，尤其与肝肾两脏的关系密切。 原因方面，中医认为屈光不正可能与以下因素有关： 1. 肝郁脾虚：长期情绪压力、工作压力导致肝郁，脾胃功能不和，影响视力。 2. 肾精不足：肾精不足，导致视力下降，尤其是夜盲。 3. 饮食不当：过度摄入辛辣、油腻、生冷等不利于身体健康的食物，影响视力。 4. 生活作息不规律：长时间使用电子设备，睡眠不足，影响眼睛健康。 矫正方法方面，中医通常建议以下几种方法： 1. 药物调理：根据中医辨证施治，使用中药调理五脏六腑，恢复其正常功能。 2. 针灸治疗：针灸可以调整肝肾功能，改善视力。 3. 食疗调理：调整饮食结构，增加营养，减少不利于视力的食物。 4. 生活方式调整：…	眼睛屈光不正的原因主要包括眼轴长度异常、角膜曲率异常以及晶状体折射能力异常等因素。在中医理论中，认为眼睛的屈光不正与肝、肾、脾等脏腑的功能失调有关，导致气血运行不畅，从而影响眼睛的正常功能。 矫正眼睛屈光不正的方法包括配戴眼镜、隐形眼镜、角膜塑形镜等辅助性视力矫正工具，以及进行近视手术等治疗方法。此外，中医治疗眼睛屈光不正的方法主要包括针灸、中药调理、保健按摩等，通过调理脏腑功能，改善气血循环，从而达到改善视力的目的。 举个例子，中医中认为，肝主目，肝气郁结会影响眼睛的功能，因此可以通过调理肝气来改善眼睛的屈光不正情况。 。	b	b
机体调节钙、磷代谢的激素有哪些？各有何作用？	甲状旁腺激素：升血钙，降血磷。促进肾近曲小管重吸收钙，升血钙；抑制远曲小管重吸收磷，降血磷。促进骨钙入血，升高血钙。促进1，25-(OH)2-D3生成，升高血钙。降钙素：降血钙，降血磷。抑制骨钙入血，降血钙和血磷。抑制肾小管对钙、磷、钠、氯的重吸收。抑制1，25-(OH)2-D3生成，降血钙。维生素D3：升血钙，升血磷。促进小肠钙的吸收。PTH的协同下促进骨钙溶解，升血钙。增加肾小管对磷的重吸收，升血磷。由于血磷和血钙都升高，又促进骨的钙化，促进骨生成。	在中医理论中，钙和磷的代谢调节与体内的阴阳平衡、气血运行、脏腑功能等密切相关。以下是一些调节钙磷代谢的激素及其作用： 1. 甲状腺激素（T3和T4）：甲状腺激素对钙磷代谢有重要影响。它们通过调节骨骼代谢，促进钙的释放和磷的吸收，帮助维持血钙水平。甲状腺功能减退可能导致血钙降低，出现“水痘”等症状。 2. 甲状旁腺激素（PTH）：PTH由甲状旁腺分泌，主要调节血钙水平。当血钙水平低时，PTH会促进骨骼释放钙，增加肾脏重吸收钙，减少磷的排泄，进而提高血钙水平。 3. 组织型甲状旁腺激素（PTHrP）：这种激素主要在骨骼和某些肿瘤细胞中产生，参与调节骨骼代谢，尤其在骨骼生长和骨转移性疾病中发挥作用。 4. 维生素D及其活化形式：维生素D在肠道中被吸收，转化为25-羟基维生素D3（25(OH)D3），然后在肝脏和肾脏中转化为活性形式1,25-二羟基维生素D3（1,25(OH)2D3）。1,25(…	机体调节钙、磷代谢的激素主要有甲状旁腺激素（PTH）和活性维生素D。PTH主要的作用是促进肾脏对钙的重吸收，同时促进骨骼中的骨溶解，增加血液中的游离钙离子浓度。活性维生素D则作用于小肠，促进钙和磷的吸收，同时也与PTH协同作用以维持血液中的钙磷平衡。 举个例子，当机体血液中的钙离子浓度下降时，甲状旁腺就会释放PTH，促进肾脏对钙的重吸收，同时通过促进骨骼中的骨溶解释放更多的钙进入血液中。活性维生素D则会促进小肠对钙的吸收，以补充血液中的钙离子。	a	a
何谓骨骼肌的兴奋－收缩耦联？主要包括几个步骤？	当肌细胞兴奋时，首先在肌细胞膜上产生动作电位，然后才发生肌丝滑行，肌节缩短，肌细胞收缩。这种以肌细胞膜动作电位引发机械收缩的中介机制称为兴奋-收缩耦联。兴奋通过横管传向肌细胞内部；三联管处的信息传递；肌质网释放钙离子进入肌质，以及钙离子由胞质向肌质网的再积聚。	骨骼肌的兴奋－收缩耦联是指神经系统通过电信号刺激骨骼肌细胞，引发一系列生化反应，最终导致肌肉收缩的过程。这个过程主要包括以下几个步骤： 1. **神经肌肉接头的兴奋**：当神经细胞释放的神经递质（如乙酰胆碱）到达神经肌肉接头时，会与肌肉细胞上的受体结合，导致接头处的电压门控钠通道打开。 2. **动作电位的产生**：由于钠通道的开放，大量正离子的流入导致肌肉细胞膜电位迅速升高，形成动作电位。这个过程通常称为“电兴奋”。 3. **肌肉收缩**：动作电位的产生触发了肌肉细胞内的肌动蛋白和肌球蛋白的交联，导致肌肉纤维收缩。这个过程通常称为“机械收缩”。 4. **恢复原位**：收缩结束后，肌肉细胞通过ATP（三磷酸腺苷）将钙离子从肌浆网运回肌肉细胞的内存，钙离子与肌动蛋白和肌球蛋白解离，肌肉纤维放松，恢复到原来的状态。 这个过程在中医中被认为是“气机”的体现，气机的顺畅与否直接关系到肌肉的收…	骨骼肌的兴奋-收缩耦联是指神经冲动在神经肌肉接头传导后，引起肌肉纤维产生收缩的过程。主要包括以下几个步骤： 1. 神经冲动传导：神经冲动从中枢神经系统传导到神经肌肉接头。 2. 神经递质释放：神经冲动到达神经肌肉接头后，导致乙酰胆碱释放，乙酰胆碱是一种神经递质，能够与肌肉纤维上的受体结合。 3. 肌肉兴奋传导：乙酰胆碱与肌肉纤维上的受体结合后，引起肌肉兴奋传导，导致肌肉细胞内部的电位发生改变。 4. 肌钙蛋白复合物解离：肌肉细胞内的钙离子释放并与肌钙蛋白复合物结合，使得肌钙蛋白复合物解离。 5. 肌纤维收缩：解离的肌钙蛋白复合物使得肌肉纤维中的肌动蛋白与肌肌蛋白结合，开始进行肌肉收缩。 6. 肌肉收缩：肌肉纤维的肌动蛋白与肌肌蛋白结合后，肌肉开始收缩，完成肌肉收缩过程。 举例：比如当我们想要抬起手臂时，大脑会发送神经冲动到手臂的肌肉，触发乙酰胆碱的释放，然后引起肌肉收缩，最终实现抬起手臂…	a	a
简述物质跨膜转运的形式。	被动转运、主动转运、胞入和胞出。被动转运分为单纯扩散、易化扩散（载体介导的易化扩散、通道介导的易化扩散）。主动转运分为原发性主动转运和继发性主动转运。	在中医理论中，物质跨膜转运主要涉及到药物的吸收、分布、代谢和排泄过程。中医认为，药物的作用机制与人体的气血运行、经络通畅、脏腑功能等密切相关。以下是中医理论中物质跨膜转运的一些主要形式： 1. 经络通畅：中医认为药物通过经络的通畅与否来影响其吸收和分布。例如，若药物具有温经散寒的作用，通过温煦经络，促进药物的吸收和分布。 2. 脏腑功能：药物的代谢和排泄与脏腑的功能状态紧密相关。例如，肝脏是药物代谢的主要场所，若肝功能正常，药物可以被有效代谢和排泄。 3. 气血运行：药物的作用也与气血的运行有关。例如，若药物具有补气养血的作用，通过调和气血，促进药物的吸收和利用。 4. 体液平衡：药物的吸收和排泄也受到体液平衡的影响。例如，药物的脂溶性与水溶性会影响其在体内的分布和排泄。 5. 生理状态：药物的吸收和排泄还受到个体生理状态的影响，如年龄、性别、体重等因素都会影响药物的转运。	中医认为，物质跨膜转运的形式主要有三种：气、血、津液。其中气是人体最重要的生命活动之一，它通过呼吸系统进入人体内部，运行于脏腑经络，维持着人体的正常功能。血是心脏通过血管系统将氧、营养物质等输送到全身各个组织器官的重要介质。津液则是人体内部的一种液体，起着润泽滋养的作用，保持人体的生理平衡。 举例来说，中医认为脾胃是气的转化中心，脾胃功能失调会导致气的运行障碍，引发各种病理变化。同时，肝主疏泄，血的畅通与否与肝的功能密切相关。肝气郁结会导致血液运行不畅，出现血瘀现象。津液则主要是由肾脏调节，肾虚会导致水液代谢失调，出现津液不足的症状。	tie	tie
简述体液的分布，内环境与内环境稳态。	人体内的所有液体总称为体液，其中2/3为细胞内液，1/3为细胞外液。细胞外液包括组织间液、血浆、淋巴液、脑脊液和关节腔液。生理学中将细胞外液称为机体的内环境。机体通过多种调节机制，使内环境的各种化学成分（如水、各种营养物质、电解质等）和理化特性（酸碱度、温度、渗透压等）保持相对稳定，即内环境稳态。	体液的分布主要包括血液、淋巴液、组织间液、细胞内液和体腔内液等。其中，血液约占体重的7%，是维持生命活动的主要载体，负责运输氧气、营养物质、激素和废物。淋巴液主要分布在淋巴系统中，负责免疫功能和维持组织间液的平衡。组织间液是指组织间的液体，包括间隙液和胶原蛋白溶液，提供机体的润滑和支持。细胞内液是指细胞内部的液体，含有细胞器、溶质和水分，维持细胞的正常功能。体腔内液包括胸腔、腹腔和脑脊液，分别填充胸腔、腹腔和脑脊管，保护器官并保持其正常功能。 内环境是指机体内部的微环境，包括血液和组织间液等，维持着机体的正常生理活动。内环境稳态是指机体内部环境的稳定性，包括水电解质平衡、pH值、氧气和二氧化碳的浓度等。内环境稳态的维持对于机体的正常功能至关重要。例如，血液中的pH值需要在略酸性范围内（约7.35-7.45），以保证酶的活性和细胞的正常代谢。 在中医理论中，体液的分布与内环境稳态与“气血”…	体液主要包括血液和淋巴液。血液在血管系统中循环输送养分、氧气和代谢产物，维持机体的正常代谢活动。淋巴液则是通过淋巴系统将组织液中的废物和细菌排出体外。 内环境是指机体细胞外的液体环境，包括血液、淋巴液和细胞外液。内环境稳态是指机体在维持一定的体液组成、pH值、温度等生理指标的情况下，维持细胞内外的稳定环境，使细胞能够正常生长、代谢和功能活动。中医认为，人体的内环境稳定与脏腑功能的协调有密切关系，脏腑功能失调会导致体液分布不均，从而影响内环境的稳定。 举例来说，中医认为肝主疏泄，如果肝气郁结导致肝气不畅，就会影响体液的分布和循环，从而影响内环境的稳定，引发各种疾病。因此，中医强调调理脏腑功能，保持内环境的稳定是预防和治疗疾病的重要手段。	b	a
简述血浆渗透压的构成？何谓等渗溶液？	血浆晶体渗透压：晶体物质（大部分是氯化钠）构成的渗透压称为晶体渗透压，维持细胞内外水的平衡和细胞的正常体积；血浆胶体渗透压：蛋白质形成的渗透压，维持血管内外水平衡。渗透压与血浆渗透压相等的溶液。如0.85%葡萄糖溶液、5%葡萄糖溶液、1.9%尿素溶液。	血浆渗透压是由血浆中溶解的各种物质（如电解质、糖类、蛋白质等）产生的压力，它是维持血液在血管内不渗透到组织间隙的重要因素。血浆渗透压主要由以下几个部分构成： 1. 钠离子（Na+）：这是血浆渗透压中最主要的成分，约占总渗透压的90%左右。 2. 钾离子（K+）：钾离子在血浆渗透压中占比较小，但对于维持细胞内外的电化学平衡至关重要。 3. 胆碱离子（K+）：虽然数量较少，但胆碱离子也对血浆渗透压有贡献。 4. 氯离子（Cl-）：氯离子是血浆渗透压的第二大成分，约占总渗透压的8%左右。 5. 其他电解质：如钙离子（Ca2+）、镁离子（Mg2+）、磷酸盐等，也对血浆渗透压有所贡献。 6. 糖类：如葡萄糖，虽然数量较少，但也对血浆渗透压有影响。 等渗溶液是指溶液中溶质的浓度与血浆渗透压相等的溶液。这种溶液不会引起细胞的渗透压变化，通常不会导致细胞水分的流动。例如，0.9%的氯化钠溶液（即生理盐水…	血浆渗透压是由血浆中的蛋白质和电解质共同构成的，其中蛋白质主要是白蛋白、球蛋白等，而电解质则包括钠、钾、氯等。这些成分维持了血浆的渗透压，有助于维持血液在血管内的稳定性，避免液体外渗。 等渗溶液指的是其渗透压等于血浆渗透压的溶液。在中医中，等渗溶液经常被用来调节体内的水电解质平衡，帮助身体恢复健康。例如，人体出现脱水的情况，可以通过口服盐水来补充体内的水和电解质，帮助恢复血浆的渗透压，促进血液循环和代谢。 。	a	a
简述影响心肌自律性的因素。	4期自动去极化速度。若4期自动去极速度加快，到阈电位水平所需时间就短，则单位时间内产生自动兴奋的次数增多，自律性增高。最大舒张电位与阈电位之间的差距。最大舒张电位水平上移和阈电位水平下移，均使二者之间的差距减小，自动去极化到达阈电位水平所需时间缩短，自律性增高。	影响心肌自律性的因素主要包括内在因素和外在因素。内在因素包括遗传因素、心脏结构的异常、心肌细胞的电生理特性等。例如，某些遗传性心脏病如长QT综合征可能导致心律失常。外在因素则包括生活方式、饮食习惯、心理压力、环境因素等。中医认为，心脏的自律性也受到五行平衡和气血运行的影响。例如，肝火过旺可能导致心脏的不适，气血不足则可能影响心脏的功能。因此，保持心脏的健康，需要综合考虑内在和外在因素，并通过中医的调理方法，如调养气血、平衡五行、适当的运动和饮食来维持心脏的正常自律性。	影响心肌自律性的因素包括神经系统的调节、激素的影响、电解质的平衡、营养状况等。其中，神经系统通过交感神经和副交感神经对心脏起着重要的调节作用，交感神经对心脏有兴奋作用，而副交感神经则有抑制作用。激素如肾上腺素和甲状腺素等也会对心肌自律性产生影响。此外，电解质的平衡也是维持心肌自律性的重要因素，如钠、钾、钙等离子的平衡失调都可能影响心肌的正常功能。营养状况也会对心肌的自律性产生影响，如维生素B1缺乏可能导致心肌病变，影响心肌的正常自律性。 举例来说，如果一个人长期缺乏锻炼、营养不良，导致神经系统调节功能下降，电解质失衡，可能会影响心肌的自律性，导致心律失常等问题的发生。 。	tie	tie
简述影响心肌兴奋性的因素。	最大舒张电位与与电位之间的差距。最大舒张电位水平上移或与电位水平下移，均使二者之间的差距减小，引起兴奋所需的刺激阈值减小，兴奋性升高。Na+（或Ca2+）通道状态。Na+通道有激活、失活和备用三种状态，通道的活动有电压依从性和时间依从性。	影响心肌兴奋性的因素主要包括生理因素和病理因素。生理因素包括心肌细胞的电生理状态，如离子浓度（如钠、钾、钙）、电位差（如动作电位）、以及心脏的自主神经调节（交感和副交感神经系统的平衡）。这些因素共同作用，确保心脏的正常节律和泵血功能。 病理因素则可能导致心肌兴奋性异常，例如心律失常。心律失常可能由多种原因引起，如心脏结构的病变（如心肌炎、心肌梗死）、心脏电传导系统的障碍（如心房颤动、室颤）、内分泌紊乱（如甲状腺功能亢进）、药物副作用、以及中医理论中的“气血”和“阴阳”平衡失调等。 在中医理论中，认为心脏与“心神”密切相关，心神的平和与否直接影响心脏的功能。因此，中医治疗心律失常时，会通过调整气血、调和阴阳、疏通经络等方法来影响心肌的兴奋性。	影响心肌兴奋性的因素有很多，包括心脏自身的病变、自主神经系统的调节、荷尔蒙水平的变化等。在中医理论中，心肌的兴奋性受到心火的调节影响，心火过旺或过虚都会导致心肌兴奋性的异常。比如，情绪波动剧烈、长期忧虑或过度兴奋都会导致心火过旺，而肾气不足、心肝阴血不足等也会影响心肌的正常兴奋性。	tie	a
心肌细胞的综合分类。	普通的心肌细胞：又称工作心肌细胞，包括心房肌和心室肌，属于非自律细胞。特殊分化的心肌细胞：共同构成特殊传导系统，包括窦房结、房室交界、房室束和浦肯野纤维网。	心肌细胞的综合分类主要基于它们的形态和功能特点。根据这些特点，心肌细胞通常被分为以下几种类型： 1. **心室肌细胞**：这类细胞主要分布在心室中，负责心室的收缩和泵血功能。它们具有较大的细胞体积和较长的纤维延伸，能够产生强大的收缩力。心室肌细胞的电活动受心室电活动的控制，尤其是心室的去极化和复极化阶段。 2. **心房肌细胞**：这类细胞主要分布在心房中，负责心房的收缩和传递电信号到心室。心房肌细胞的收缩力较小，主要负责心房的扩张和收缩。它们的电活动受心房电活动的控制，尤其是心房的去极化和复极化阶段。 3. **结缔组织细胞**：这类细胞不直接参与心脏的收缩功能，但在心脏结构中起到支撑和连接作用。它们包括结缔组织细胞、纤维母细胞等。 4. **心脏间质细胞**：这类细胞包括心脏的血管内皮细胞、平滑肌细胞、间叶细胞等，它们在心脏的血液循环、营养供应和电信号传递中起着重要作用。 在中医理论…	心肌细胞可以根据其功能和结构特点进行分类。根据功能分类，心肌细胞可以分为工作细胞和传导细胞。工作细胞主要负责心脏的收缩和舒张，产生心脏的收缩力，从而推动血液流动。传导细胞则负责传导心脏的电信号，控制心脏的节律和顺序性。根据结构分类，心肌细胞可以分为心室肌细胞和心房肌细胞，它们分别位于心脏的心室和心房内部，负责不同部位的心脏功能。此外，还有一些特殊的心肌细胞，如心内膜细胞和心包细胞，它们分别位于心脏内膜和心包组织中，起着保护和滑润的作用。 举例来说，心室肌细胞是心脏中最主要的工作细胞，它们具有丰富的线粒体和肌原纤维，能够产生强大的收缩力，推动血液流向全身。而传导细胞如希氏束和房室结，则负责传导心脏的电信号，确保心脏的节律和协调性。	b	b
什么叫P-R间期？其正常范围？	指P波起点到QRS波起点之间的时程，代表从心房开始去极化到心室开始去极化所需要的时间，即兴奋经由心房、房室交界和房室束到达心室，并引起心室开始兴奋所需要的时间，故称房室传导时间。范围是0.12～0.20秒。	P-R间期是指心电图（ECG）上P波到R波之间的时间间隔。P波代表心房的收缩，而R波代表心室的收缩。P-R间期反映了心脏从心房传导到心室的时间，通常表示心脏的传导系统功能。 正常的P-R间期范围因年龄和心率的不同而有所差异。对于成年人，正常的P-R间期通常在0.12到0.20秒之间，心率在60-100次/分钟时。心率越快，P-R间期通常越短；心率越慢，P-R间期通常越长。 例如，如果一个成年人的心率是80次/分钟，正常的P-R间期可能在0.12到0.20秒之间。如果心率是40次/分钟，P-R间期可能在0.24到0.40秒之间。 P-R间期的延长可能指示心脏传导系统的问题，如心房心室传导阻滞（AV阻滞），这可能需要进一步的诊断和治疗。	P-R间期指的是心电图上P波开始到QRS波群开始之间的时间间隔，反映心房传导到心室的时间。正常情况下，P-R间期的范围是0.12-0.20秒。如果P-R间期过长或过短都可能意味着心脏传导系统存在问题，需要及时就医进行诊断和治疗。	b	a
外周神经中胆碱能纤维的分布。	交感神经和副交感神经的节前纤维副交感神经的节后纤维交感神经的小部分节后纤维（如支配汗腺、胰腺的交感胆碱能纤维和支配骨骼肌血管的交感舒血管纤维）躯体运动神经纤维.	外周神经系统中的胆碱能纤维主要分布在副交感神经纤维中。这些纤维负责传递副交感神经冲动，这些冲动在身体的多个器官和组织中发挥作用，包括心脏、消化系统、呼吸系统、泌尿系统等。 例如，在心脏中，副交感神经纤维的激活会导致心率加快（心动过速），而在消化系统中，它们可以促进胃肠蠕动，从而帮助消化和排泄。同样，在呼吸系统中，副交感神经纤维的激活可以增加气道的分泌物，帮助润滑呼吸道。 这些纤维通过神经节与其他神经纤维相连，形成复杂的神经网络，以便在身体的不同部位协调工作。这种分布确保了身体的多个系统能够根据需要相互协调，以维持生命活动的平衡。	外周神经中胆碱能纤维主要分布在副交感神经系统中，包括一些脑神经如迷走神经、三叉神经等。这些胆碱能纤维在身体内通过释放乙酰胆碱来传递神经冲动，从而调节心血管、消化系统、呼吸系统等器官的功能。例如，迷走神经释放的乙酰胆碱可以减缓心跳，放松血管，调节呼吸等。	tie	tie
简述基底神经节的主要功能和损伤后的表现？	功能：参与运动的设计与编程，协调随意运动和肌紧张；可能也与自主神经活动的调节、感觉的传入、学习和记忆等活动有关。损伤后：运动过少而肌紧张亢进的综合征，如帕金森病。	基底神经节（Basal Ganglia）是大脑中的一组结构，主要负责运动控制和学习新技能的过程。它包括多个部分，如外侧溢出核、内侧溢出核、淡黄质、纹状体和缝隙核。基底神经节的主要功能包括： 1. 运动控制：基底神经节在调节和协调运动中起着关键作用。它帮助控制肌肉的收缩和放松，确保运动的精确性和流畅性。 2. 学习和记忆：基底神经节参与学习新技能的过程，尤其是那些需要反复练习的技能，如骑自行车或弹钢琴。 3. 情绪和认知：基底神经节也与情绪调节和认知功能有关，包括注意力和决策过程。 基底神经节损伤可能导致一系列症状，包括： - 运动障碍：患者可能会出现肌肉僵硬、运动迟缓或过度活动等问题。 - 学习和记忆困难：患者可能会发现学习新技能变得困难，或者难以记住新信息。 - 情绪问题：患者可能会经历情绪波动、抑郁或焦虑。 - 认知功能下降：注意力和决策能力可能会受到影响。 例如，帕金森病是一种常见…	基底神经节是大脑中一个重要的结构，主要参与运动控制、情绪调节和认知功能。其主要功能包括参与运动的启动、调节和抑制，帮助协调肌肉活动，影响运动的速度和力度，以及参与学习和记忆过程。当基底神经节发生损伤时，可能会导致一系列症状，如肌肉僵直、震颤、动作不协调、步态异常、认知功能下降等。例如，帕金森病就是一种由基底神经节功能障碍引起的神经系统疾病，患者常表现为肌肉僵直、震颤和动作缓慢等症状。	a	a
何谓明适应？其机理如何？	从暗处来到强光下时，最初感到眼前一片耀眼光亮，不能视物稍待片刻即可恢复视觉的现象。视杆细胞在暗处时积累了大量视紫红质，进入亮处受到强光刺激，视紫红质迅速分解，产生耀眼的光感。大量视紫红质分解后，视锥细胞的感光色素才能在光亮的环境中感光。	明适应是中医理论中的一个概念，指的是人体在受到外界刺激（如药物、食物、气候等）后，能够根据自身的实际情况选择性地产生适应性反应，以维持或恢复身体的平衡和健康。这种适应性反应通常是无意识的，并且是为了应对特定刺激而调整自身生理功能的。 其机理主要基于中医的“阴阳五行”理论和“脏腑经络”网络。人体的各个脏腑器官和经络系统之间相互联系，通过调节各自的功能活动，人体能够适应外界环境的变化。例如，当人体接触到寒冷的环境时，身体会通过调节肾脏的功能，增加体内的热量生成，以抵御寒冷的影响。 在实际应用中，明适应的概念可以帮助中医医生在诊断和治疗过程中，根据患者的具体情况，选择合适的治疗方法。例如，如果患者体内有寒邪，医生可能会推荐温补的药物或饮食来帮助患者的身体适应寒冷环境，从而恢复健康。	明适应是中医理论中的一个重要概念，指的是人体对外界环境变化产生的适应能力。明适应包括生理适应和病理适应两种形式。生理适应是指人体在外界环境变化下，通过调整机体内部的生理功能，以维持内部环境的稳定，从而适应外界环境的能力。病理适应则是指在病理条件下，机体为了保护自身而产生的适应性改变。 明适应的机理主要涉及中枢神经系统和内分泌系统的调节作用。例如，当人体遇到寒冷环境时，中枢神经系统会通过调节体温、心率等生理功能来适应寒冷环境。另外，内分泌系统也会释放相应的激素来调节机体的代谢和功能。 总的来说，明适应是人体对外界环境变化产生的一种自我调节和适应能力，通过调节生理功能和代谢来保持内部环境的稳定。这一概念在中医理论中也有重要的意义，指导着中医治疗中对患者个体差异和环境因素的考虑。	tie	tie
试述肾上腺素、生长激素和胰高血糖素引起血糖升高的机制？	肾上腺素：促进肝糖原分解成葡萄糖，使血糖升高；或增强肠道对葡萄糖的吸收，抑制胰岛素分泌，间接升血糖。生长激素：降低肌肉、脂肪组织对葡萄糖的摄取利用，减少糖的消耗，同时促进肝转化生成葡萄糖，即生长激素的生糖作用。胰高血糖素：促进糖原分解，或加快氨基酸进入肝细胞，激活糖异生有关酶系，促进氨基酸转化为葡萄糖，使血糖明显升高。	肾上腺素、生长激素和胰高血糖素是人体内调节血糖水平的关键激素，它们通过不同的机制来促进血糖水平的升高。 1. 肾上腺素（肾上腺素也称为肾上腺素素或肾上腺素，简称EP）：肾上腺素是一种交感神经系统激素，主要由肾上腺髓质分泌。当身体面临紧急情况，如压力、恐惧或运动时，交感神经系统会被激活，释放肾上腺素。肾上腺素的作用包括心率加快、血管收缩、肌肉紧张等。同时，肾上腺素也会刺激肝脏释放储存的糖原转化为葡萄糖，并通过肝脏的葡萄糖释放作用增加血糖水平。 2. 生长激素（GH）：生长激素由脑垂体前叶分泌，主要调节生长和发育。除了促进骨骼生长，生长激素还具有促进糖原分解和葡萄糖释放的作用。生长激素通过刺激肝脏释放糖原，增加血糖水平，同时也促进脂肪组织中的脂肪酸分解，增加脂肪酸在血液中的浓度。 3. 胰高血糖素（GLP-1）：胰高血糖素是一种由小肠L细胞分泌的肽类激素，它在餐后被释放。胰高血糖素的主要作用…	肾上腺素、生长激素和胰高血糖素都是影响血糖水平的重要激素。肾上腺素和生长激素的作用主要是通过促进糖原分解和葡萄糖释放到血液中来提高血糖水平，这是机体在应激状态下为了提供更多能量而采取的生理反应。而胰高血糖素则是由胰岛细胞分泌的一种激素，它的作用是促进肝脏释放葡萄糖、抑制胰岛素的分泌，从而导致血糖升高。 总的来说，这三种激素通过不同的机制影响血糖水平，但最终都会导致血糖升高。在中医的视角下，血糖升高可能会导致气血失调、阴阳失衡等病理情况，需要及时调理和治疗。	a	a
胰岛素的生理作用？	调节物质代谢：糖代谢：降低血糖。脂肪代谢：促进脂肪的合成与储存，抑制脂肪的分解与利用。蛋白质代谢：促进蛋白质的合成。促进机体生长：与生长激素共同作用时，发挥明显的促生长作用。	胰岛素是一种由胰腺β细胞分泌的激素，它在人体内扮演着至关重要的角色。其主要生理作用包括： 1. 调节血糖水平：胰岛素的主要功能是促进身体细胞吸收葡萄糖，降低血液中的糖分水平。它帮助将葡萄糖运输到细胞内，供细胞进行能量代谢和其他生命活动。 2. 促进脂肪和蛋白质的合成：胰岛素还促进肝脏和肌肉组织合成蛋白质，帮助修复和增强组织，同时促进脂肪的合成和储存。 3. 促进葡萄糖的储存：胰岛素促进肝脏和肌肉储存葡萄糖，形成糖原，这样在血糖水平低时可以快速释放糖原供能。 4. 影响脂肪代谢：胰岛素还参与调节脂肪的代谢，促进脂肪酸的合成和储存，同时抑制脂肪的分解和释放。 在中医理论中，胰岛素的作用与“调和气血”有关。它帮助维持身体的能量平衡，确保各个器官和组织得以正常运作。然而，中医更侧重于整体调理和自然恢复，而不是依赖外源性药物。因此，中医治疗胰岛素抵抗或糖尿病等疾病，通常会采用饮食调整、运动疗法、草…	胰岛素是一种由胰腺分泌的激素，主要功能是调节血糖水平。它能促进葡萄糖的吸收和利用，降低血糖浓度，同时促进肝脏、肌肉和脂肪组织对葡萄糖的摄取和利用，从而维持血糖平衡。胰岛素还可以促进葡萄糖的转化为脂肪和蛋白质，以及抑制血糖过高时的葡萄糖产生。 临床上，中医认为胰岛素的功能与脾胃相关，脾胃是人体的消化吸收中心，与胰岛素的生理作用密切相关。如果脾胃功能不好，会导致血糖代谢紊乱，进而影响胰岛素的生理作用，容易出现血糖波动和糖尿病等问题。	a	a
机体长期缺碘时患何病？机理如何？	地方性甲状腺肿。食物及饮水中缺碘，使甲状腺激素合成和分泌减少，以至T3和T4对腺垂体的负反馈作用减弱，而TRH对腺垂体的作用增强，引起TSH分泌增多，TSH刺激甲状腺，使甲状腺代偿性肿大。	机体长期缺碘会导致碘缺乏病，主要表现为甲状腺功能减退症，包括甲状腺肿（特别是结节性甲状腺肿）、甲状腺功能减退症和甲状腺癌。碘是甲状腺激素合成的必需元素，缺碘会影响甲状腺激素的合成和分泌，进而影响身体的新陈代谢。 碘缺乏的机理主要是由于甲状腺激素合成受到了影响。甲状腺激素（主要是三碘甲状腺原氨酸T3和甲状腺素T4）在碘的参与下合成。缺碘时，甲状腺无法合成足够的T3和T4，从而导致甲状腺激素水平下降。这种情况下，身体的新陈代谢会受到影响，包括心脏、神经系统、肌肉和生殖系统的功能都会受到影响。 例如，在一些碘缺乏严重的地区，如中国的某些山区，碘缺乏病的发病率非常高。为了解决这一问题，中国政府曾推行了大规模的碘化盐计划，将碘添加到盐中，以补充人体的碘需求，有效地控制了碘缺乏病的流行。	长期缺碘会导致甲状腺功能减退，即所谓的甲状腺功能低下症。这是因为碘是甲状腺激素合成的必需元素，甲状腺激素对于机体的新陈代谢、生长发育等功能至关重要。缺碘时，甲状腺激素的合成受到抑制，逐渐导致甲状腺功能的减退。 举例来说，长期生活在碘缺乏的地区的人群可能会出现甲状腺肿大（即所谓的甲状腺肿）以及甲状腺功能低下的症状，如体力疲乏、代谢率降低、心率变缓等。特别是对于孕妇和儿童，碘缺乏可能导致智力发育不全或智力低下，这在临床上被称为克汀病（cretinism）。 机理上，甲状腺激素的合成需要碘参与，主要通过甲状腺摄取血液中的碘，经过一系列反应合成甲状腺激素。缺乏碘会阻碍这个过程，最终导致甲状腺激素水平下降，从而引发相关的疾病。	a	a
