# Supplementary material
Source: ML conference proceedings conference paper supplement (https://openreview.net/forum?id=R7pR4dzgAV)
Supplement: supplementary_material [file meden_mismatches.xlsx]

## Sheet: Sheet1
id	reference	model_answer_a	model_answer_b
5	这是朱丹溪的核心学术思想之一，是他对人体阴阳的基本观点。他通过对自然现象的观察与格物，发现天大地小、日大月小的规律，说明即是在生理状况下，也存在着阳有余、阴不足和气有余而血不足的情况。具体而言：人之阴阳动静，动多静少人之生长衰老，阴精难成易亏人之情欲无涯，相火易夺阴精因此在防治早衰时，宜注意清心寡欲、茹淡饮食，以免诱发相火妄动；平时注意保养阴血、阴精，慎动而主静。	朱丹溪是明代著名的中医医家，他在中医理论中提出了“阳有余阴不足”的学术观点。这个观点认为，人体的生命活动是由阴阳平衡状态来维持的。在这个观点中，阳代表的是身体的外在活动、生理功能和阳性的生命力，而阴则代表的是身体的内在潜藏、恢复和阴性的生命力。 朱丹溪认为，人体在正常情况下，阳和阴是相辅相成、相互依赖的。然而，他也指出，在某些情况下，阳的功能可能过于强盛，而阴的功能则相对不足。这种情况下，阳的过剩可能导致身体的外在活动过度，而阴的不足则可能导致身体的内在恢复功能受损。 例如，如果一个人在夏季外出工作时间较长，长时间暴露在阳光下，可能会导致阳气过旺，而阴气不足。这种情况下，可能会出现口渴、盗汗、心烦等症状。朱丹溪认为，治疗这种情况需要通过调节阴阳平衡，增强阴气，减轻阳气，以恢复身体的平衡状态。 朱丹溪的这一学术观点在中医理论中占有重要地位，至今仍被用来指导临床治疗和疾病预防。	朱丹溪认为“阳有余阴不足”是指人体阳气过盛，而阴气不足。这种情况在中医学中被认为是一种失衡状态，容易导致身体出现各种症状，比如口干、咽喉干燥、大便干燥等。朱丹溪强调调理阴阳平衡对于维持身体健康至关重要，通过中药调理、针灸或其他中医疗法来调整体内的阴阳平衡，以达到治疗疾病和强身健体的目的。 举例来说，如果一个人出现口干舌燥、心烦易怒、大便干燥等症状，中医会根据朱丹溪的观点认为这个人体内阳气过盛，阴气不足，需要通过药物或针灸来调理阴阳平衡，以达到治疗的效果。 。
6	庞氏指出广义伤寒的病因是寒毒，只不过由于感受邪气的时间、地点、地域和体质的不同，个体表现出狭义伤寒、中风、风温、温病、湿病、暑病等不同的证候。庞氏强调一切外感热病的共同病因都是“毒”，故外感中以“温毒”和“寒毒”为剧。（指出素体盛衰在发病中具有关键性作用。具体而言，人的禀气包含了素体与勇怯两个方面。而素体的寒热，又是“毒气从化”的决定因素。发病与四时气候、地域居处关系密切。	庞安时的寒毒说是中医学中的一种理论，主要是指寒邪和毒邪在人体内的相互作用及其对人体的影响。寒毒说认为，寒邪和毒邪在人体内的相互作用可以导致一系列的病理变化和疾病。 寒毒说认为，寒邪主要是由外界的寒冷环境、饮食过冷、情绪抑郁等因素引起的，它可以导致人体的阳气受损，导致气血运行不畅，导致寒邪内侵。寒邪内侵可以导致多种症状，如身体疼痛、关节炎痛、腹痛、便秘、食欲不振等。 毒邪则是指外界的有毒物质、病原体等进入人体，引起的毒性反应。毒邪可以通过食物、空气、水等途径进入人体，也可以通过外伤、感染等途径引起。毒邪在人体内可以导致气血运行不畅，导致一系列的病理变化，如发热、出疹、疼痛、消化不良等。 寒毒说认为，寒邪和毒邪在人体内的相互作用可以导致更严重的病理变化，如寒毒互结，寒毒相乘等。因此，中医治疗寒毒病症时，需要根据寒毒的具体情况，采取不同的治疗方法，如温阳散寒、清热解毒、活血化瘀等。	庞安时的寒毒主要指的是体内寒气过重所导致的病症。他认为寒气是一种阴邪，容易侵袭人体，导致寒症。寒症表现为体寒、畏寒、肢冷、腹痛、腹泻等症状，严重时还会影响脏腑功能，导致各种疾病。庞安时在《金匮要略》中提出了针对寒症的治疗方法，如温补、祛寒、理气等，以恢复体内的平衡状态。 举例来说，如果一个人常年受寒湿环境的影响，食用生冷食物过多，导致体内寒气过重，就容易引发寒症。针对这种情况，庞安时会建议通过温补的中药调理，避免寒邪的侵袭，以恢复身体的健康状态。
7	王孟英是温病大家，对六气中“暑”的研究有建树。他对历代医家对暑病的认识进行了归纳总结，旗帜鲜明地反对李东垣把“阴暑阳暑”的划分，认为“至暑乃天之热气，流金灼石，纯阳无阴。”他反对东垣“阳邪为热，阴邪为暑”的观点，指出暑与热皆为阳邪。对“暑必兼湿”的观点进行了质疑，指出暑“多”夹湿，但未必夹湿。暑同寒邪无可阳可阴之分，因为夏月寒湿之证不应当属于暑病。对暑病的治疗，与东垣的“清暑益气汤”义相迥，创制王氏“清暑益气汤”，以西洋参与西瓜翠衣为君药。	王士雄是中国古代著名的医家，他在《温病论》中对暑病的研究有着重要的贡献。王士雄认为，暑病是由于暑热侵袭人体所致，主要表现为发热、头痛、咳嗽、咽喉痛等症状。他提出了“温病一气化燥”的理论，认为暑病是由暑热直接作用于人体，导致体内气机失调，引起燥热内蕴，从而形成温病。 王士雄在治疗暑病方面，主张“先清后补”，即首先用清热解毒的方法治疗，待病情有所缓解后，再进行补益。例如，他会使用一些清热解毒的药物，如菊花、黄连等，并且强调饮食上要注意清淡，以减轻体内的热量负担。 王士雄的这些理论和治疗方法，对后世的温病学有着深远的影响，他的贡献至今仍被中医界所重视和学习。	王士雄是清代著名医学家，他在《伤寒杂病论》中对暑病的病因、病机、诊断和治疗等方面做出了重要贡献。他认为暑病的发生是由于热邪侵袭，导致人体阳气不固，阴邪内生，从而引发一系列症状。在治疗方面，他主张辨证施治，根据患者的具体情况采用不同的治疗方法，例如清热解毒、疏风清热、泻火透毒等。他还提出了一些辨证施治的经验，如重视脉象、舌象等诊断方法，以及运用中药调理患者的阴阳平衡。王士雄的贡献对于暑病的治疗和研究具有重要意义。
9	叶天士总结了清以前历代先贤对中风病的治法，如刘河间、李东垣、朱丹溪、薛立斋、缪仲醇等。提出“阳化内风”说，认为是“身中阳气之变动”所致；其病机或由于肾液少，水不涵木，虚风内动；或由于平昔怒劳忧思，五志气火交并于上，肝胆内风鼓动盘旋，上盛而下虚；或由于肝血肾液两枯，阳扰风旋；或由于中阳不足，阳明脉络空虚，内风暗动。叶氏提出滋阴熄风、镇阳熄风、和阳熄风、缓肝熄风、养血熄风、介类潜阳诸法，旨在调和阳气之变动，并指出“身中阳化内风，非发散可解，非沉寒可清”，临床认识十分深刻常选用的方剂有仲景的复脉汤、河间的地黄饮子、丹溪的虎潜丸、景岳的镇阴煎等，并多用介类、石类、养血、缓肝之品。	叶天士（1558-1610），字子高，号松雪，江苏常州人，是明代著名的医家，被誉为“后世医圣”。他在中风病的治疗上有着独到的学术特色，主要体现在以下几个方面： 1. 重视辨证施治：叶天士强调中风病的治疗应根据患者的具体情况进行辨证施治。他认为中风病的原因多种多样，包括内伤、外伤、气血失调等，因此治疗方法也应根据患者的具体病因和症状来定。例如，对于因内伤导致的中风，应侧重于调理内脏；而对于因外伤导致的中风，则应首先处理外伤伤情。 2. 强调温和治疗：叶天士主张中风病的治疗应温和而不应激烈。他认为过于激烈的治疗可能会加重病情，因此在治疗中风时，应避免使用剧烈的药物和手法。例如，他认为使用温和的药物如人参、黄芪等来调养气血，而不是使用强烈的药物如大黄、牡丹皮等来泻火解毒。 3. 重视养生保健：叶天士不仅关注疾病的治疗，还重视预防和养生。他认为良好的生活习惯和饮食习惯对于预防中风病具有重要作用。…	叶天士治疗中风病的学术特色主要体现在他对中风病机的深刻理解和独特治疗方法上。他强调中风病的发病与气血运行失调有关，注重调理脏腑，平衡阴阳，以达到治疗中风病的目的。叶天士的治疗方法包括针灸、草药、推拿等多种手段，综合运用以达到最佳疗效。他在临床实践中积累了丰富的经验，形成了独特的治疗方案，广受患者好评。 举例来说，叶天士在治疗中风病时常常运用穴位刺激来促进气血的流通，调节脏腑功能，加速康复进程。同时，他还注重患者的个体差异，因人而异地制定个性化的治疗方案，使治疗更加精准有效。
10	叶氏尊崇李东垣《脾胃论》，重视脾胃不同的生理功能和病理特点，提到“脏宜藏，腑宜通，脏腑之体用各殊也。”他强调脾胃分治，阐明太阴湿土得阳始运，阳明燥土得阴自安；所以治脾可宗东垣甘温升发，治胃则宜甘凉通降。提出养胃阴，认为不宜苦降和苦寒下夺之品，而应运用甘平或甘凉濡润之品，使津液来复，通降自成。常选用玉竹、花粉、沙参、石斛和麦冬等。华岫云称赞叶氏“此种医论，实超出千古”。	叶桂是中国著名的中医师和学者，她在中医养生领域有着深厚的造诣。叶桂提倡的“养胃阴”思想，主要是指通过调整饮食、生活习惯和适当的中药调理，来增强胃肠功能，保护胃阴，达到养生之目的。 在中医理论中，胃阴是指胃的津液和阴液，它对于维持人体的正常生理功能至关重要。胃阴不足，可能导致消化不良、胃痛、口苦等症状。叶桂认为，养胃阴不仅仅是治疗胃阴不足的症状，更是长期的养生策略。 叶桂提出的养胃阴的方法包括但不限于以下几点： 1. 调整饮食：多吃温和、易于消化的食物，如糙米、豆制品、蔬菜和水果，避免辛辣、油腻、生冷等刺激性食物，以免伤胃阴。 2. 适当补充：可以通过食用一些补胃阴的食物，如梨、蜂蜜、梨汁、黄芪、山药等，来帮助补充胃阴。 3. 调整生活习惯：保持良好的生活习惯，如适时进食、避免过度劳累、保持良好的心态等，以减少对胃的负担。 4. 中药调理：根据个人的体质和病情，适当使用一些中药，如黄芪、山…	叶桂是我国古代著名的中医学家，他在《千金要方》中提到了“养胃阴”的学术思想。在中医理论中，胃主受纳，胃阴不足会导致消化功能减退，出现胃痛、消化不良等症状。叶桂认为通过调养胃阴可以达到调节脏腑功能、平衡阴阳的目的。 养胃阴的方法包括饮食调理、药物治疗等。比如，多食用一些滋阴润燥的食物，如梨、银耳、绿豆等，可以帮助滋养胃阴；同时，也可以运用一些中药如熟地、黄精等进行治疗。叶桂的学术思想强调了内在调养的重要性，通过调整饮食结构和药物治疗来达到治疗胃病的效果。 总的来说，叶桂的“养胃阴”学术思想强调了中医养生的理念，即通过调整体内阴阳平衡来达到治疗疾病、增强身体健康的目的。
11	薛雪，字生白，号一瓢，著《湿热条辨》，对湿热和湿温病的发病与病机规律作了系统总结。薛雪认为湿热病不同与一般的外感热病，从表伤者，十之一二，有口鼻入者，十之八九，主要发病的脏腑有太阴脾土、阳明胃腑、少阳三焦与厥阴肝木。薛雪深刻地认识到湿热病的病机在于：热为天之气，湿为地之气，热得湿而愈炽，湿得热而愈横。湿热两分，其病轻而缓；湿热两合，其病重而速。因此，治疗湿热病一定药运用三焦的特点，分消湿热。具体的治疗中还有湿热本证，湿热表证，湿邪偏盛，湿热并重，热邪偏盛，湿热充斥三焦和湿热阴伤和湿热阳虚等证治。	薛生白是清代著名的中医医家，他在《薛生白医案》中对“湿热病”的病机和治疗有着深入的研究。薛生白认为，“湿热病”是由湿邪和热邪相互作用产生的病证，常见于夏季或湿热多的地区。湿邪主要由饮食不当、生活环境潮湿等因素引起，而热邪则可能由内伤或外感引起。 薛生白认为湿热病的病机主要表现为“湿热相乘”，湿邪阻滞气血，热邪炽盛，导致身体出现发热、恶心、呕吐、腹痛、便秘或腹泻等症状。治疗湿热病，薛生白主张“祛湿除热”为要领。 治疗大法方面，薛生白提倡用药物和针灸结合。药物治疗方面，他主张使用清热燥湿的药物，如黄连、黄芩、茯苓、茅根等。同时，他也强调使用健脾利湿的药物，如茯苓、白术、陈皮等，以帮助脾胃健运，减轻湿邪的影响。 针灸治疗方面，薛生白认为可以选取利湿除热的穴位，如足三里、太冲、神阙等穴位，以助于调和气血，疏通经络，达到祛湿除热的目的。 总之，薛生白的湿热病治疗方法强调了病因病机的辨证施治，通过药…	回答: 薛生白认为“湿热病”是由湿邪和热邪相互结合所致，主要表现为湿浊与热毒相互纠缠，阻滞气血运行，导致机体失衡。治疗“湿热病”的大法主要包括清热利湿、祛湿化痰、疏风散寒等方法。具体的治疗方法可以根据患者具体的症状和体质来定，如可以采用中药调理、针灸、艾灸等中医疗法来帮助患者恢复健康。 举例来说，如果患者出现湿热病的症状，如口干、口苦、舌苔黄腻等，可以选择清热利湿的中药如黄连、黄芩等来治疗。如果患者有痰湿阻滞的症状，可以采用祛湿化痰的中药如半夏、陈皮等来调理。在治疗过程中，还需要注意患者的饮食调理，避免食用辛辣刺激性食物，多食用清淡易消化的食物。 总的来说，薛生白所提出的治疗“湿热病”的大法，是通过调理体内的湿热之邪，恢复机体的平衡，从而达到治疗疾病的目的。
13	北宋的朱肱，字翼中，著《南阳活人书》，是关于《伤寒论》研究的一部重要的学术著作，历史上有深刻而广泛的影响。朱氏从经络辨病位，率先提出六经实质的研究课题。他认为，《伤寒论》的三阴三阳即足之六经。所以，他的学说便被称为足之六经说。朱氏用“经络说”不仅解释症状，而且根据经络分析病位，并结合《素问•热论》的六经病作对比。朱肱的这些贡献对后世伤寒派的研究，以及立“六经提纲证”有很大启发。	宋代朱肱是中国古代著名的医学家之一，他在伤寒六经的研究上做出了重要贡献。朱肱认为，伤寒六经是指六个主要的经络系统，它们分别对应于人体的六个脏腑系统。朱肱的研究成果主要体现在以下几个方面： 1. 经络与脏腑的关系：朱肱强调了经络与脏腑之间的密切关系，他认为经络是脏腑功能活动的通路，是疾病发生发展的途径。例如，他认为心经与心脏相连，肝经与肝脏相连，等等。 2. 经络的分布：朱肱详细描述了经络的分布情况，他认为经络不仅仅分布在身体的表面，还深入到身体的内部，包括在脏腑内部。他还提出了经络的起止点、分支情况等。 3. 经络与疾病的关系：朱肱认为经络是疾病发生发展的关键，他强调了经络病变对人体健康的影响。例如，他认为经络的阻滞可以导致疼痛、肿胀等症状。 4. 经络的调理方法：朱肱提出了许多调理经络的方法，如针灸、按摩、拔罐等。他认为这些方法可以疏通经络，恢复经络的正常功能，从而达到治疗疾病的目的。…	朱肱是宋代著名的医学家，他在《伤寒论》的基础上进行了深入的研究，提出了关于伤寒六经实质的理论。他认为，伤寒病是由外邪侵袭人体所致，导致六经失调，表现为不同的症状。根据六经实质的理论，朱肱提出了相应的治疗方法，包括辨证施治、调理阴阳、疏通经络等。这些理论对后世的中医发展产生了重要影响。 举例来说，朱肱认为在伤寒病的治疗中，应根据患者的具体症状和体质特点来辨证施治，比如对于阳明经实质者，应重视清热泻火；对于太阴经实质者，应重视健脾和胃。通过这种个性化的治疗方法，可以更好地调理六经，达到治疗的效果。
14	各家学说课程把医家、学说和学派三者有机地联系起来，形成了一个整体。三者之间以历代医家的学验作为基石和材料，各种学说和假说作为建筑骨架，学派则是学术思想大厦的顶端；其中学派的概念是最大的——即抓住了学派，也就抓住了中医学术思想发展的主要脉络。掌握了学派思想，便有利于正确全面地评价医家在历史上的贡献与特色。	在中医中，医家、学说和学派之间存在着密切的联系和相互影响的关系。下面我们将逐一解释这些概念，并探讨它们之间的关系。 首先，医家通常指的是在中医领域内具有杰出贡献和影响力的医生或学者。他们通过实践和研究，形成了自己的理论体系和治疗方法。例如，张仲景是中国古代著名的医家，他的《伤寒论》至今仍被广泛使用，是中医药学的经典之作。 其次，学说是指中医理论体系的总称，包括了中医的基本理论、诊断学、治疗学等方面的内容。学说是医家的理论和实践的总结，是中医传承和发展的基础。例如，四诊（望、闻、问、切）是中医诊断学的基本方法，它是医家们通过长期实践总结出来的。 最后，学派则是指在中医理论和实践上形成的特定的派别或流派。学派通常由一群医家共同形成，他们的理论和方法有着共同的特点和特征。例如，四诊学派和脉学派就是在中医理论和实践上形成的两个重要学派。 医家通过实践和研究，形成了自己的学说；学说又为医家提供了理…	回答: 医家、学说和学派是中医领域中常见的三个概念，它们之间的关系可以理解为医家代表了一位医学大家或医学流派的创始人，学说则是该医家或医学流派所倡导的医学理论或治疗方法，而学派则是在这个学说的基础上形成的一支派别或学术团体。 举个例子，孙思邈是唐代的一位著名医家，他创立了孙氏学派，该学派以"四气调神大论"为代表作，主张调理人体的气血阴阳，强调预防和调理。在孙氏学派的基础上，后来形成了一系列的医学流派和派别，如汤液学派、张仲景学派等。 因此，医家代表了医学思想的先驱和代表人物，学说是医学思想的具体体现，而学派则是在学说的基础上形成的一种传承和发展。在学习中，我们需要理解这三者之间的内在联系和发展脉络，以便更好地理解中医学的历史和学术传承。
21	控制呼吸道感染；吸氧；畅通呼吸道，改善呼吸功能（解痉平喘、化痰、必要时呼吸机辅助治疗）;控制心力衰竭;并发症的处理及营养支持	肺心病急性加重期的治疗原则主要包括以下几个方面： 1. **稳定病情**：首先要稳定患者的生命体征，防止病情进一步恶化。可能需要使用氧疗、机械通气等措施来改善患者的呼吸功能。 2. **控制症状**：根据患者的具体症状，使用对症治疗，如使用支气管扩张剂来缓解哮喘症状，使用利尿剂来减轻水肿等。 3. **改善心脏功能**：由于肺心病患者心脏功能受损，治疗时应注重心脏功能的保护，可能需要使用心脏药物如利尿剂、ACE抑制剂等。 4. **调整体液**：由于肺心病患者往往伴有水肿，治疗时应注意体液的平衡，避免过度脱水。 5. **营养支持**：由于患者可能有消化吸收不良，需要通过合理的营养支持来提高患者的能量状态。 6. **心理支持**：对于患者的心理状态也要给予足够的关注和支持，避免焦虑和抑郁等情绪问题对病情的影响。 7. **预防并发症**：在治疗过程中，应密切监测患者的生命体征，预防并发…	肺心病是一种心脏病的并发症，会对肺部造成损害。在急性加重期，治疗原则主要包括以下几点：首先是处理心功能不全，包括卧床休息、氧疗、利尿剂等措施来减轻心脏负担，同时控制心律失常。其次是处理肺部损害，例如使用支气管扩张剂、吸入氧气、抗生素治疗等来缓解肺部症状。最后是控制原发疾病，如高血压、冠心病等，从根本上减轻心脏负担。 举例来说，对于急性加重期的肺心病患者，可以给予洋地黄类药物来增加心肌收缩力，改善心功能；同时也可以利用吸入雾化治疗来改善肺功能，减轻呼吸困难的症状。在治疗过程中要密切监测患者的病情变化，及时调整治疗方案。 。
24	全身症状：全身中毒症状多表现为长期低热，多见于午后，可伴乏力、盗汗、食欲减退、体重减轻、面颊潮红、妇女月经失调等。呼吸系统症状：咳嗽、咯血、胸痛、呼吸困难。体征：取决于病变性质和范围。早期多无异常体征。渗出性病变范围较大或干酪样坏死时，则可以有肺实变体征，如触觉语颤增强、叩诊浊音、听诊闻及支气管呼吸音和细湿啰音。较大的空洞性病变听诊也可以闻及支气管呼吸音。当有较大范围的纤维条索形成时，气管向患侧移位，患侧胸廓塌陷、叩诊浊音、听诊呼吸音减弱并可闻及湿啰音。结核性胸膜炎时有胸腔积液体征：气管向健侧移位，患侧胸廓望诊饱满、触觉语颤减弱、叩诊实音、听诊呼吸音消失。	肺结核是一种常见的慢性传染病，主要影响肺部，但也可以扩散到其他器官。其临床表现多样，主要包括以下几种： 1. **慢性咳嗽**：这是肺结核最常见的症状，咳嗽可能是干咳或带痰，痰液可能是清水样或带血。 2. **咳嗽痰中带血**：随着病情的发展，咳嗽痰中可能出现血丝或血块，这是由于肺部的炎症和组织破坏引起的。 3. **体重减轻**：由于消化系统的影响，患者可能会出现食欲不振和体重减轻。 4. **发热**：发热可能是全身性的，尤其是在病情初期或病情加重时。 5. **夜间盗汗**：患者可能会在睡眠中出汗，白天可能感觉潮湿或冷汗。 6. **疲劳**：患者可能会感到全身无力，活动后容易疲倦。 7. **胸痛**：在某些情况下，患者可能会感到胸痛，尤其是在深呼吸或咳嗽时。 8. **呼吸困难**：如果肺结核导致肺部结构破坏，患者可能会感到呼吸困难。 9. **胸部X光片异常**：在体检中，胸…	肺结核的临床表现包括慢性咳嗽、咳痰、咯血、低热、盗汗、乏力、食欲不振等症状。在中医理论中，肺主气机，肺结核的临床表现与肺气虚弱、肺热炽盛等因素有关。通过中医辨证施治，可以根据患者的具体症状和体质特点制定个性化的治疗方案，包括草药、针灸、艾灸等治疗方法。
28	胸痛，呼吸困难,吞咽困难声音嘶哑,上腔静脉综合症,霍纳综合征等。	原发性支气管肺癌（Non-Small Cell Lung Cancer, NSCLC）是一种常见的肺部恶性肿瘤，可能会通过局部转移（即癌细胞扩散到肺部周围组织）引起一系列症状。这些症状取决于癌细胞转移的位置和数量。以下是一些可能的症状： 1. **胸痛**：当肿瘤局部转移到胸壁、胸膜或肺周围组织时，可能会引起胸痛，尤其是在深呼吸、咳嗽或转体时加剧。 2. **呼吸困难**：如果肿瘤压迫或阻塞了气道，患者可能会感到呼吸困难，尤其是在活动时。 3. **咳嗽**：肿瘤本身可能会引起咳嗽，而局部转移可能会导致咳嗽加重或咳嗽中带有血。 4. **咯血**：肿瘤可能会导致咯血，尤其是如果癌细胞转移到了气管或支气管。 5. **胸腔积液**：癌细胞转移到胸膜后可能会引起胸腔积液，这可能会导致呼吸困难和胸痛。 6. **体重减轻**：由于癌症的代谢改变和可能的食欲不振，患者可能会出现体重减轻。 7. …	中医学认为原发性支气管肺癌肿瘤局部转移引起的症状可能包括咳嗽、咳痰、胸痛、呼吸困难等。根据中医理论，这些症状可能是由于肺经受到阻塞、瘀滞或虚弱引起的。中医治疗原发性支气管肺癌肿瘤局部转移的方法包括清热解毒、活血化瘀、理气祛痰等。具体的治疗方法需要根据患者的具体症状和体质特点来进行个性化调理。 举例来说，对于出现咳嗽、咳痰等症状的患者，中医可能会采用柴胡、枳壳、款冬花等清热化痰的药物进行治疗。而对于胸痛、呼吸困难等症状，中医可能会采用当归、川芎、红花等活血化瘀的药物来缓解疼痛和改善呼吸。综合运用中医药中的各种治疗方法，可以帮助患者减轻症状、提高生活质量。
32	突然发作的胸痛呈压迫性、紧缩性等钝性疼痛。常有一定的诱因。历时短暂，一般不超过十五分钟。休息或含用硝酸甘油后可迅速缓解。	心绞痛，又称为心肌梗死或心脏绞痛，是一种由于冠状动脉供血不足导致的心脏肌肉暂时性缺血和缺氧的症状。典型的心绞痛特点包括： 1. 疼痛的位置：疼痛通常位于胸部，可能向颈部、肩部、臂部、颈部、背部或下颌部放射。 2. 疼痛的特征：疼痛通常是压迫性或紧绷感，可能是刀割样或压迫感，有时也可能是胀痛。 3. 疼痛的持续时间：疼痛通常持续数分钟到30分钟，持续时间较长的疼痛可能是心肌梗死的迹象。 4. 疼痛的诱因：疼痛可能在剧烈运动、情绪压力、寒冷或饥饿时加剧。 5. 疼痛的缓解：疼痛通常在休息或服用尼古丁类药物后缓解。 需要注意的是，心绞痛的症状可能因人而异，有些人可能没有典型的胸痛感，而是出现呼吸困难、恶心、呕吐或出汗等非典型症状。因此，对于疑似心绞痛的症状，应立即就医。	典型心绞痛的特点包括：发作时持续时间短暂（通常在几分钟内），疼痛性质为压榨性、闷痛或窒息感，常常在胸骨后部或胸前部，也可放射至左肩、左臂、颈部或下颚，发作时可伴有出汗、恶心、呕吐、呼吸困难等症状。此外，心绞痛通常会由情绪激动、剧烈运动或寒冷天气等诱发。 举例：一个患者在激烈运动后突然出现胸痛，疼痛感压榨且向左臂放射，同时伴有冒汗、恶心的症状，这种情况可能是典型的心绞痛表现。
36	肝脏本身改变及肝功能减退的临床表现：营养障碍，肝脏肿大或缩小；消化道症状；出血倾向和贫血；内分泌失调。门脉高压症的表现：脾脏肿大；侧支循环建立与开放；腹水。	肝硬化的失代偿期是指肝脏的再生能力已经丧失，无法有效地修复损伤，导致肝功能进一步恶化。在这个阶段，患者可能会出现以下临床表现： 1. 腹水（腹水）：由于肝脏不能有效地处理体液，患者可能会出现腹部肿胀，甚至出现腹水。 2. 食欲不振：肝脏功能受损，影响到消化系统的正常运作，导致食欲下降。 3. 体重减轻：由于消化吸收功能下降，食欲不振，患者可能会出现体重减轻。 4. 肝性脑病：肝脏不能有效清除血液中的毒素，可能导致神经系统受累，出现肝性脑病的症状，如昏睡、谵妄、癫痫等。 5. 出血倾向：肝脏是血液凝固的重要场所，肝功能受损可能导致血液凝固功能障碍，出现出血倾向。 6. 肝肾综合征：肝硬化患者可能会出现肾功能障碍，称为肝肾综合征。 7. 肝癌风险增加：肝硬化患者有较高的风险发展成肝细胞癌。 8. 肌肉无力：肝脏是体内多种维生素和矿物质的代谢中心，功能受损可能导致肌肉无力。 9. 黄疸：肝脏不…	在肝硬化肝功能失代偿期，患者可能会出现以下临床表现： 1. 腹水：由于肝功能减退，导致肝脏无法正常产生足够的蛋白质，从而引起体内蛋白质的流失，造成腹腔内液体聚集。 2. 腹胀、消化不良：肝硬化患者消化功能减弱，肠道功能受损，容易出现腹胀、腹泻、便秘等消化不良症状。 3. 肝性脑病：由于肝功能障碍，无法清除体内毒素，导致脑部受损，出现认知障碍、昏睡、精神异常等症状。 4. 乏力、食欲减退：肝功能减退会导致身体无法正常代谢营养物质，出现乏力、食欲减退等全身症状。 5. 发热、肝区疼痛：肝硬化患者在失代偿期可能会出现发热、肝区疼痛等症状，这是由于肝脏受损引起的炎症反应所致。 临床表现因人而异，还会受到肝硬化病因、病程、合并症等因素的影响，因此在出现上述症状时应及时就医并接受专业治疗。 。
38	诊断依据：暴食或饮酒后突然发生上腹持续疼痛、恶心、呕吐、发热及血清淀粉酶增高。治疗原则；控制炎症发展：禁食及胃肠减压；减少胰腺分泌；减低胰酶活性。全身支持及对症治疗：止痛；补充营养；抗休克。减少并发症：抗感染；多器官受累处理。外科治疗。	急性胰腺炎的诊断主要依据临床症状、实验室检查和影像学检查。临床症状包括上腹痛、恶心、呕吐、体重减轻等。实验室检查中，血清胰腺酶（如胰腺淀粉酶、胰凝血酶原）升高是诊断急性胰腺炎的重要指标。影像学检查如B超可以显示胰腺和周围组织的炎症改变。 处理原则包括： 1. 保持患者的生命体征稳定，尤其是监测血压、心率和呼吸情况。 2. 休息，避免剧烈运动。 3. 通过静脉输液补充水分和电解质，必要时使用胰岛素降低血糖。 4. 对于轻度病例，可能只需要保守治疗；对于中度至重度病例，可能需要手术干预，如切除炎症的胰腺组织。 5. 对于感染性胰腺炎，可能需要抗生素治疗。 6. 遵循中医的原则，如调理脾胃、养阴清热、活血化瘀等，以促进病情恢复。	回答: 急性胰腺炎的诊断依据主要包括患者的症状、体征以及实验室检查结果。常见的症状包括腹痛、恶心、呕吐等；体征包括腹部压痛、腹肌紧张等；实验室检查常见的异常包括血淀粉酶和血清淀粉酶的升高等。处理原则是治疗原发病因、控制炎症、缓解症状并预防并发症。在中医中，可采取清热解毒、理气和胃、活血化瘀等方法来治疗急性胰腺炎，如清热利湿的龙胆泻肝丸、理气和胃的保和丸等。同时，患者还需要注意饮食，避免过于油腻和刺激性食物，保持情绪稳定等。
41	诊断：有尿感反复发作史1年以上，肾外形凹凸不平，两肾大小不等；静脉肾盂造影可见肾盂肾盏变形狭窄；肾盂形状异常；持续性肾小管功能损害	慢性肾盂肾炎的诊断通常需要结合临床症状、实验室检查和影像学检查的结果。以下是诊断慢性肾盂肾炎的一些标准： 1. 临床症状：患者可能会有持续的或反复发作的尿频、尿急、尿痛、尿急尿频伴有尿痛等症状。同时，可能伴有腰痛、下腹痛或全身性症状如发热、乏力等。 2. 实验室检查：血液检查可能显示白细胞增多、尿液检查可能显示尿液中白细胞和蛋白质增多，尿液细菌培养可发现尿路感染的细菌。尿液常规检查中的白细胞计数和红细胞计数也可能升高。 3. 影像学检查：B超、CT扫描或尿路造影等检查可以帮助观察肾脏和输尿管的结构变化，如肾结石、肾盂扩张、输尿管阻塞等。 4. 临床表现：慢性肾盂肾炎的诊断还需要考虑患者的长期症状和病史，包括是否有慢性感染的迹象，如反复发作的感染、慢性炎症反应等。 需要注意的是，慢性肾盂肾炎的诊断不仅仅依赖于单一的检查结果，而是需要综合考虑多方面的信息。因此，确诊时应由专业的医疗人员进行综…	慢性肾盂肾炎的诊断通常需要综合临床表现、实验室检查和影像学检查等多方面的信息。一般来说，慢性肾盂肾炎的诊断标准包括： 1. 临床表现：慢性肾盂肾炎患者常常表现为反复发作的腰痛、尿频、尿急、尿痛等症状。有些患者可能还会有发热、全身不适等表现。 2. 实验室检查：常规尿液检查可以发现白细胞、红细胞、蛋白质等异常，尿培养可能会发现细菌感染。血液检查中白细胞计数增高、C反应蛋白升高等也有助于诊断。 3. 影像学检查：包括B超、CT、MRI等检查可以显示肾盂肾炎的病变情况，如肾盂积水、肾盂肾炎的病灶等。 综合以上信息，结合患者的临床表现和检查结果，医生可以做出慢性肾盂肾炎的诊断。在诊断过程中，还需要排除其他可能引起类似症状的疾病，如肾结石、泌尿系统肿瘤等。 举例：根据患者的临床表现和尿液检查发现白细胞计数增高、尿培养阳性，结合B超检查显示肾盂积水，可以初步诊断为慢性肾盂肾炎。
47	门静脉压力增高；低蛋白血症；肝淋巴液生成过多；继发性醛固酮增多；抗利尿激素分泌增多；有效循环血容量不足。	肝硬化腹水的形成主要是由于肝脏功能受损，导致门脉高压和淋巴回流障碍。门脉高压是由于肝脏纤维化和结节形成，阻塞了门脉血液的正常流向，导致门静脉压力升高，从而使腹水形成。淋巴回流障碍则是由于肝硬化导致的腹腔内淋巴管受压，影响了腹水的正常吸收。 例如，在某些肝硬化患者中，门脉高压可能会导致食管静脉曲张和胃底静脉曲张等并发症，而淋巴系统的功能障碍则可能导致腹水持续积聚，影响患者的生活质量。	肝硬化腹水形成的原因主要是由于肝脏发生严重病变导致肝功能减退，血浆蛋白合成减少，造成体内的血浆胶体渗透压下降，从而引起血浆蛋白渗透性增加，水分在血管和组织间隙内潴留增多，最终形成腹水。此外，肝硬化还可能导致门静脉高压，血液不能正常流回心脏，进而导致腹水的发生。 举例来说，肝硬化最常见的原因是长期酗酒、慢性病毒性肝炎、脂肪肝等造成的肝脏损伤，引发了肝硬化的发展，最终导致腹水形成。 .
55	1987年全国再障学术会议修订了再障的诊断标准：全血细胞减少，网织红细胞绝对值减少。一般无脾肿大。骨髓至少有一部位增生减低或重度减低(如增生活跃，须有巨核细胞明显减少)，骨髓小粒成分中应见非造血细胞增多(有条件者应做骨髓活检)。能除外引起全血细胞减少的其他疾病。一般抗贫血药物治疗无效。	再生障碍性贫血（Aplastic Anemia）是一种罕见的疾病，其诊断标准通常基于临床表现、实验室检查和骨髓活检的结果。以下是诊断再生障碍性贫血的主要步骤和标准： 1. 临床表现：患者可能会出现贫血、感染频繁、出血倾向和骨髓抑制等症状。这些症状可能会逐渐发展，或者在短时间内迅速恶化。 2. 血液检查：通过全血细胞计数（CBC）可以观察到血细胞数量的显著下降，包括红细胞、白细胞和血小板。血液检查还可能显示血细胞的形态学异常。 3. 骨髓活检：这是诊断再生障碍性贫血的金标准。通过活检可以观察到骨髓中造血干细胞的减少或功能障碍，导致血细胞的生成减少。骨髓活检还可以帮助区分其他可能导致类似症状的疾病。 4. 免疫学检查：在某些情况下，可能会进行免疫学检查，以排除免疫介导的再生障碍性贫血，如自身免疫性再生障碍性贫血。 5. 其他检查：可能还包括遗传学检查，以排除遗传性疾病，如Fanconi贫血。…	再生障碍性贫血的诊断标准主要包括：1.全血细胞减少：包括贫血、白细胞减少和/或血小板减少；2.骨髓增生减低：骨髓增生活性减低，表现为骨髓细胞数量减少、巨核细胞减少或消失等；3.排除其他原因所致的全血细胞减少：需要进行详细的病史询问、体格检查、实验室检查等以排除其他原因引起的全血细胞减少，如感染、药物反应、自身免疫性疾病等。 举例来说，如果一个患者出现贫血、白细胞减少和血小板减少的症状，同时骨髓检查显示骨髓增生活性减低，且经过详细检查排除其他病因引起的全血细胞减少，那么可以初步诊断为再生障碍性贫血。
61	发热和感染、出血及贫血 淋巴结和肝脾肿大，病人常有胸骨下端局部压痛，偶见绿色瘤，中枢神经系统白血病(CNL)其他可有齿龈、皮肤、睾丸浸润表现，心肺肾肠生殖道均可受累。	急性白血病（Acute Leukemia）是一种恶性疾病，主要影响骨髓，导致其产生的血细胞出现异常。其主要表现通常包括： 1. 疲劳和乏力：由于骨髓功能受损，无法正常生产血细胞，导致患者感到极度疲劳和乏力。 2. 发热：患者可能会出现持续性或周期性的发热，这是由于白血病细胞的增殖和骨髓功能障碍引起的。 3. 骨痛：骨髓被白血病细胞侵占，可能导致骨痛，尤其是在脊柱、颅骨和长骨等部位。 4. 出血和淤血：由于血小板数量减少，患者可能会出现皮肤淤血、鼻出血、牙龈出血等症状。 5. 肿大淋巴结：白血病细胞可能会累积在淋巴结，导致淋巴结肿大。 6. 皮肤问题：患者可能会出现皮肤瘙痒、紫癜、水肿等皮肤症状。 7. 呼吸困难：白血病细胞可能累积在肺部，导致呼吸困难。 这些症状可能会迅速恶化，需要及时的医疗干预。中医在治疗急性白血病方面，通常会采用调理气血、补益脾肾、活血化瘀等方法，同时配合西医的化疗、…	急性白血病的主要表现包括贫血、出血、感染等症状。患者可能会出现乏力、乏力、头晕、头痛、发热、骨痛、关节痛、淋巴结肿大等症状。此外，急性白血病患者的白细胞数量增多，但功能异常，无法有效对抗感染，因此容易引起各种感染。在中医的角度上，急性白血病属于“白痢”范畴，治疗上一般会根据患者的体质和症状选用相应的中药进行调理。
63	又称心力衰竭，是心血管疾病常见的并发症。当心脏疾病发展到一定程度时，其舒张功能发生障碍，心脏虽有足够的前负荷，排血量仍不能满足机体组织代谢的需要。此时静脉血液回流受阻、脏器淤血，而动脉系统血液供应不足，临床上以肺循环和（或）体循环淤血以及组织血液灌注不良为特征。	心功能不全是指心脏泵血功能减弱，无法有效地将血液泵送到全身的病理状态。它可以分为四个级别：轻度、轻至中度、中度和重度。轻度心功能不全时，心脏仍然能够满足日常生活的需求，但在剧烈运动时可能会感到呼吸困难。中度心功能不全时，患者在日常活动中也会感到呼吸困难，甚至在休息时也可能出现呼吸困难。重度心功能不全时，患者的生命质量受到严重影响，需要定期住院治疗。 心功能不全的原因多种多样，包括心肌病变、心脏结构异常、心律失常、心包炎、心内膜炎、心脏瓣膜病等。治疗心功能不全通常需要综合治疗，包括药物治疗、生活方式的调整、心脏康复训练等。在某些情况下，可能需要手术治疗，如心脏瓣膜手术或心脏移植。 中医对于心功能不全的理解是“心阳虚弱”，认为心脏的功能受到肝郁脾虚、气血不足等因素的影响。中医治疗心功能不全通常采用活血化瘀、补气养阴、强心安神等方法，通过中药、针灸、按摩等手段来调整身体的内环境，提高心脏的功能。	心功能不全是指心脏无法有效地完成泵血和供血的功能，导致心脏无法满足身体的需求。这种情况可能由于心脏肌肉受损、心脏瓣膜问题、心律失常等原因引起。在中医理论中，心功能不全可能与心火过旺、心气不足等因素有关。治疗心功能不全的中医方法包括针灸、中药调理、推拿按摩等，以调整心脏功能，增强心脏健康。 。
64	为左心衰竭的典型表现，常在夜间熟睡后，突然憋醒，被迫坐起，可伴阵咳，咯泡沫痰或呈哮喘状态，称为心源性哮喘。发生阵发性夜间呼吸困难的主要机制可能是：睡眠时的平卧位致使静脉回流增加，膈肌上升，肺活量减少；夜间迷走神经张力增高，支气管发生痉挛而影响呼吸，以及冠状动脉容易收缩而使心肌供血减少等。	阵发性夜间呼吸困难，又称为睡眠呼吸暂停（Sleep Apnea），是一种在睡眠中发生的呼吸暂停现象。这种情况通常会导致患者在睡眠中多次暂停呼吸，这些暂停可能会持续数秒钟到数分钟不等。每次暂停后，患者可能会有强烈的呼吸反应，伴随着打鼾声或打翻身等行为。 睡眠呼吸暂停可能由多种因素引起，包括肥胖、颈部过度肥大、鼻窦炎症、酒精滥用、睡眠位置（侧卧或仰卧）以及某些药物的使用等。这种情况可能会导致患者在白天感到疲劳、注意力不集中、记忆力下降以及情绪波动等问题。 中医认为，睡眠呼吸暂停可能与肺肾两虚、气血不足、痰湿内蕴等体质偏差有关。治疗时，可以通过调整饮食、改善生活习惯、进行适当的运动、使用中药调理气血和润肺止咳等方法来缓解症状。同时，中医还可能会结合针灸、按摩等手段来调整体内气机，促进睡眠质量。	阵发性夜间呼吸困难是指在夜间睡眠中突然发生的呼吸困难症状。这种症状通常是由于气道阻塞、心脏疾病、肺部疾病或者神经系统问题导致的。在中医理论中，阵发性夜间呼吸困难可以与肺气虚弱、心火上炎等病机相关。针对这种症状，中医可以通过调节体内的气血平衡、调理脏腑功能来缓解症状。常用的治疗方法包括针灸、中药调理、推拿按摩等。但在治疗之前，一定要先明确病因，以便进行针对性的治疗。
66	房室传导阻滞是指冲动从心房传至心室的过程中发生障碍。按其阻滞的程度，分为3度：Ⅰ度房室传导阻滞为窦性冲动自心房传至心室的时间延长；Ⅱ度房室传导阻滞为窦性冲动中有一部分不能传至心室；Ⅲ度房室传导阻滞（完全性房室传导阻滞）为窦性冲动全部不能传至心室，以致于由阻滞部位以下起搏点来控制心室活动。	房室传导阻滞是指心脏的房室结（连接心房和心室的结构）传导功能障碍，导致心脏的正常节律被打断。这种情况下，心房的电信号不能正常传递到心室，从而影响心脏的正常跳动。房室传导阻滞可能表现为心房颤动（AF），心房扑动（AT）或心房室折返性心动过速等。 在中医理论中，房室传导阻滞可能与心脏的气血运行不畅有关。例如，若肝火过旺或肾阴虚可能导致心脏的气血运行不畅，从而影响心脏的正常节律。此外，情绪压力、饮食不当、睡眠不足等也可能影响心脏的功能。 治疗房室传导阻滞时，中医可能会采用调理气血、平衡阴阳、疏通经络等方法。例如，通过中药治疗来调和心脏的气血，或者通过针灸、按摩等手段来疏通经络，促进气血流通。同时，生活习惯的调整，如保持良好的饮食习惯、适量运动、保证充足睡眠等，也是非常重要的。	房室传导阻滞是指心脏传导系统中房室传导出现问题，导致心脏搏动的传导速度减慢或者传导阻滞。这种情况可能会导致心脏搏动不协调，心率不规律，甚至引起心悸、头晕、乏力等症状。在中医看来，房室传导阻滞可能与心脏的气血运行不畅、心火过旺等因素有关。针对房室传导阻滞，中医通常会采用针灸、中药调理心脏功能，促进心脏的气血运行，达到调整心脏传导系统的目的。
73	糖尿病患者在病程中出现的严重代谢紊乱。由于脂肪加速分解，造成其代谢产物大量增多，产生大量酮体，并有代谢性酸中毒，高血糖。常常有严重脱水，可造成循环和肾功能衰竭。	糖尿病酮症酸中毒（Diabetic Ketoacidosis, DKA）是一种严重的并发症，主要发生在1型糖尿病患者中，但也可能在2型糖尿病患者中出现，尤其是在没有足够治疗的情况下。它是由于身体缺乏胰岛素而产生的，胰岛素是调节血糖水平的关键激素。当胰岛素水平低于正常水平时，身体开始分解脂肪以获取能量，这个过程会产生酮体。 酮体是一种酸性物质，当它们在体内积累时，会导致血液pH值下降，引发酸中毒。DKA的典型症状包括严重的脱水、口渴、多饮、多尿、疲劳、恶心、呕吐和呼吸急促。严重的情况下，患者可能会出现意识模糊甚至昏迷。 治疗DKA通常包括静脉注射胰岛素、补充水分和电解质，以及监测血糖和血液pH值。早期诊断和治疗对于预防并发症至关重要。例如，未经治疗的DKA可能导致心脏问题、肾衰竭甚至死亡。 在中医的角度看，糖尿病酮症酸中毒可能与肝肾阴虚、脾胃虚弱等体质有关。中医治疗可能包括调理脾胃、补肾阴…	糖尿病酮症酸中毒是糖尿病患者在血糖控制不当或出现严重感染等情况下产生的一种严重并发症。当血糖过高时，机体无法充分利用血糖作为能量来源，转而开始分解脂肪来提供能量，产生大量酮体。当体内酮体过多时，会导致血液变酸，出现酮症酸中毒的症状，如呼吸深快、口渴、尿频等。中医认为糖尿病酮症酸中毒属于糖尿病的并发症，治疗上应当积极控制血糖，调整饮食结构，避免过度饮食甜食，保持规律的生活作息。同时中医药也可以辅助治疗，如服用一些具有降血糖作用的中药或采用针灸等方法来调节体内的阴阳平衡。但是在治疗糖尿病酮症酸中毒时，还是应当优先进行现代医学的治疗，包括紧急补液、胰岛素治疗等。 .
74	类风湿性关节炎是以关节滑膜损害为主要病变的自身免疫性疾病。患者体内产生大量免疫球蛋白，其中包括了类风湿因子，主要有IgG型和IgM型。因此类风湿因子实际上是免疫球蛋白。	类风湿因子（Rheumatoid Factor, RF）是一种抗体，它在体内通常用来识别和清除体内的其他抗体。然而，在某些情况下，类风湿因子可能会错误地攻击身体的健康组织，特别是关节软骨和关节周围的组织。这种情况下，类风湿因子被认为与类风湿关节炎（Rheumatoid Arthritis, RA）等自身免疫性疾病有关。 在中医的观点中，类风湿关节炎可能与体内湿邪或风邪的侵袭有关。湿邪可能导致关节疼痛和肿胀，而风邪则可能导致关节活动受限和疼痛。中医治疗可能包括使用温经散寒、活血化瘀、利水渗湿等方法来缓解症状。	类风湿因子是一种抗核抗体，是类风湿性关节炎的一个重要血清学指标。它是一种自身免疫反应产生的抗体，主要针对自身的关节组织，导致关节炎的发生。类风湿因子的检测可以帮助医生进行类风湿性关节炎的诊断和监测疾病的活动性。一般情况下，类风湿因子的正常值为阴性，但在患有类风湿性关节炎等风湿性疾病的患者体内会产生较高水平的类风湿因子。因此，类风湿因子的检测对于早期发现和治疗类风湿性关节炎具有重要意义。
75	指细胞膜通过本身的能量消耗，将物质逆电-化学梯度进行转运的过程。主要特点是需要额外供能，介导主动转运的膜蛋白本质上也属于载体，能与被转运物质特异性结合。	在中医理论中，主动转运是指药物或治疗手段能够通过自身的活力作用，促进药物或治疗原理在人体内的有效转运和利用。这种转运方式与被动转运相对，被动转运是指药物或治疗原理依赖于外界条件（如温度、湿度等）来促进其在人体内的分布和作用。 主动转运的特点主要包括： 1. 自身活力：药物或治疗手段具有自身的活力，这种活力能够促进药物在人体内的有效转运和利用。 2. 适应性强：主动转运的药物或治疗手段能够根据个体的具体情况调整其作用方式，以达到最佳的治疗效果。 3. 安全性高：由于药物或治疗原理能够根据人体的反应进行调整，因此在治疗过程中相对安全，不易产生不良反应。 4. 效果持久：主动转运的药物或治疗手段能够在人体内持续作用，促进身体的自我恢复和调节。 例如，中药材中的活性成分如黄芪、丹参等，具有活血化瘀、补气健脾的主动转运作用，它们能够根据人体的具体情况，通过自身的活力促进血液循环，增强脾胃功能，从而…	主动转运是中医术语，指的是在治疗过程中，医师对患者进行一系列的引导和教育，使患者在日常生活中能够主动地调整饮食、作息、情绪等方面的因素，从而促进疾病康复和身体健康。主动转运的特点包括： 1. 个性化定制：主动转运强调因人而异，根据患者的具体情况和诉求，制定个性化的养生方案，使患者更容易接受和坚持。 2. 综合治疗：主动转运不仅注重药物治疗，还包括饮食调理、运动锻炼、情绪调节等多方面的干预措施，综合治疗效果更佳。 3. 强调预防：主动转运不仅关注疾病治疗，更强调疾病的预防，通过调整生活方式和养成良好的生活习惯，减少疾病的发生风险。 4. 持续性维护：主动转运不仅是一次性的治疗，而是一个长期的过程，医师和患者需要保持沟通和合作，持续进行健康管理和调整。 举例来说，对于患有高血压的患者，主动转运的治疗方案可能包括控制钠盐摄入、增加运动量、保持心情舒畅等方面的建议，患者需在医师的指导下积极调整生…
76	阈强度：在刺激的持续时间和强度-时间变化率固定的情况下，能够引起可兴奋细胞产生兴奋的最小刺激强度。阈电位：能够引起膜对钠离子通透性突然增大并产生动作电位的临界膜电位称为阈电位。	很抱歉，但根据您提供的问题，阈强度与阈电位并不属于中医的范畴，而是生物电学和神经科学的概念。阈强度通常指的是刺激某一神经或肌肉时所需的最小强度，而阈电位则是指在神经元或肌肉细胞上产生动作电位所需的最小电位变化。 如果您有其他关于中医的具体问题，我会很乐意提供帮助。例如，您可以询问关于中医诊断方法、治疗原则、常见疾病的中医治疗方法等。请随时提出相关问题。	阈强度是指神经元兴奋所需的最低电压强度，可以引发神经元的动作电位。而阈电位是指神经元膜内外电位之间的差值达到一定数值时，神经元才会产生动作电位传递信号。简单来说，阈强度是刺激神经元所需的电压强度，而阈电位是神经元内外电位达到的临界值。 举例来说，如果一个神经元的阈强度为20mV，那么只有当外部刺激电压达到20mV时，这个神经元才会被激活产生动作电位。而阈电位则是指神经元膜内外电位的差值达到一定数值时，神经元才会传递信号。
77	如果给予可兴奋细胞的刺激强度太小，不能引起动作电位；一旦刺激强度达到阈值时，就能引起一个幅度最大的动作电位，继续增加刺激强度，动作电位的幅度也不会增大。	在中医理论中，“全或无”定律是指某些治疗方法或药物在治疗过程中往往需要达到一定的剂量或强度，才能产生预期的治疗效果。如果剂量过小或过弱，可能无法达到治疗目的；反之，如果剂量过大或过强，可能会产生副作用甚至损害健康。这个定律强调了治疗的量变与质变的关系，要求医生在治疗时要精确掌握药物的用量和治疗的强度，以达到最佳的治疗效果。 例如，在中药治疗中，某些药物需要达到一定的浓度才能发挥其治疗作用。如果剂量不足，可能无法有效治疗疾病；如果过量，可能会引起不良反应。因此，中医医生在开具药方时，会根据患者的具体情况和病情的严重程度，精确计算药物的用量，以确保治疗的安全性和有效性。	“全或无”定律是中医理论中的一个重要概念，指的是人体脏腑之间的相互联系和影响。即在疾病发展过程中，某一脏腑出现病变时，会影响到其他相关脏腑的功能，表现为全身症状或者没有任何症状。这个定律强调了脏腑之间的密切联系，也说明了中医治疗疾病时需要综合考虑整体情况，而不是只关注某一个部位。 举例来说，中医认为肝主疏泄，如果肝气郁结导致肝病，就会出现头晕、眩晕、胸闷等全身症状。反之，有时候肝病患者可能并不明显出现肝脏的症状，而是表现为消化不良、失眠等问题。这就是“全或无”定律的体现。 。
91	人体内的所有液体总称为体液，其中2/3为细胞内液，1/3为细胞外液。细胞外液包括组织间液、血浆、淋巴液、脑脊液和关节腔液。生理学中将细胞外液称为机体的内环境。机体通过多种调节机制，使内环境的各种化学成分（如水、各种营养物质、电解质等）和理化特性（酸碱度、温度、渗透压等）保持相对稳定，即内环境稳态。	体液的分布主要包括血液、淋巴液、组织间液、细胞内液和体腔内液等。其中，血液约占体重的7%，是维持生命活动的主要载体，负责运输氧气、营养物质、激素和废物。淋巴液主要分布在淋巴系统中，负责免疫功能和维持组织间液的平衡。组织间液是指组织间的液体，包括间隙液和胶原蛋白溶液，提供机体的润滑和支持。细胞内液是指细胞内部的液体，含有细胞器、溶质和水分，维持细胞的正常功能。体腔内液包括胸腔、腹腔和脑脊液，分别填充胸腔、腹腔和脑脊管，保护器官并保持其正常功能。 内环境是指机体内部的微环境，包括血液和组织间液等，维持着机体的正常生理活动。内环境稳态是指机体内部环境的稳定性，包括水电解质平衡、pH值、氧气和二氧化碳的浓度等。内环境稳态的维持对于机体的正常功能至关重要。例如，血液中的pH值需要在略酸性范围内（约7.35-7.45），以保证酶的活性和细胞的正常代谢。 在中医理论中，体液的分布与内环境稳态与“气血”…	体液主要包括血液和淋巴液。血液在血管系统中循环输送养分、氧气和代谢产物，维持机体的正常代谢活动。淋巴液则是通过淋巴系统将组织液中的废物和细菌排出体外。 内环境是指机体细胞外的液体环境，包括血液、淋巴液和细胞外液。内环境稳态是指机体在维持一定的体液组成、pH值、温度等生理指标的情况下，维持细胞内外的稳定环境，使细胞能够正常生长、代谢和功能活动。中医认为，人体的内环境稳定与脏腑功能的协调有密切关系，脏腑功能失调会导致体液分布不均，从而影响内环境的稳定。 举例来说，中医认为肝主疏泄，如果肝气郁结导致肝气不畅，就会影响体液的分布和循环，从而影响内环境的稳定，引发各种疾病。因此，中医强调调理脏腑功能，保持内环境的稳定是预防和治疗疾病的重要手段。
94	最大舒张电位与与电位之间的差距。最大舒张电位水平上移或与电位水平下移，均使二者之间的差距减小，引起兴奋所需的刺激阈值减小，兴奋性升高。Na+（或Ca2+）通道状态。Na+通道有激活、失活和备用三种状态，通道的活动有电压依从性和时间依从性。	影响心肌兴奋性的因素主要包括生理因素和病理因素。生理因素包括心肌细胞的电生理状态，如离子浓度（如钠、钾、钙）、电位差（如动作电位）、以及心脏的自主神经调节（交感和副交感神经系统的平衡）。这些因素共同作用，确保心脏的正常节律和泵血功能。 病理因素则可能导致心肌兴奋性异常，例如心律失常。心律失常可能由多种原因引起，如心脏结构的病变（如心肌炎、心肌梗死）、心脏电传导系统的障碍（如心房颤动、室颤）、内分泌紊乱（如甲状腺功能亢进）、药物副作用、以及中医理论中的“气血”和“阴阳”平衡失调等。 在中医理论中，认为心脏与“心神”密切相关，心神的平和与否直接影响心脏的功能。因此，中医治疗心律失常时，会通过调整气血、调和阴阳、疏通经络等方法来影响心肌的兴奋性。	影响心肌兴奋性的因素有很多，包括心脏自身的病变、自主神经系统的调节、荷尔蒙水平的变化等。在中医理论中，心肌的兴奋性受到心火的调节影响，心火过旺或过虚都会导致心肌兴奋性的异常。比如，情绪波动剧烈、长期忧虑或过度兴奋都会导致心火过旺，而肾气不足、心肝阴血不足等也会影响心肌的正常兴奋性。
96	指P波起点到QRS波起点之间的时程，代表从心房开始去极化到心室开始去极化所需要的时间，即兴奋经由心房、房室交界和房室束到达心室，并引起心室开始兴奋所需要的时间，故称房室传导时间。范围是0.12～0.20秒。	P-R间期是指心电图（ECG）上P波到R波之间的时间间隔。P波代表心房的收缩，而R波代表心室的收缩。P-R间期反映了心脏从心房传导到心室的时间，通常表示心脏的传导系统功能。 正常的P-R间期范围因年龄和心率的不同而有所差异。对于成年人，正常的P-R间期通常在0.12到0.20秒之间，心率在60-100次/分钟时。心率越快，P-R间期通常越短；心率越慢，P-R间期通常越长。 例如，如果一个成年人的心率是80次/分钟，正常的P-R间期可能在0.12到0.20秒之间。如果心率是40次/分钟，P-R间期可能在0.24到0.40秒之间。 P-R间期的延长可能指示心脏传导系统的问题，如心房心室传导阻滞（AV阻滞），这可能需要进一步的诊断和治疗。	P-R间期指的是心电图上P波开始到QRS波群开始之间的时间间隔，反映心房传导到心室的时间。正常情况下，P-R间期的范围是0.12-0.20秒。如果P-R间期过长或过短都可能意味着心脏传导系统存在问题，需要及时就医进行诊断和治疗。
