# Supplementary material
Source: ML conference proceedings conference paper supplement (https://openreview.net/forum?id=R7pR4dzgAV)
Supplement: supplementary_material [file psyen.xlsx]

## Sheet: Sheet1
context	Question	Concise_Reference	model_answer_a	model_answer_b	model_a_vs_model_b_new_new	model_a_vs_model_b	model_a_vs_model_b_new
艾宾浩斯以自己为被试，采用机械重复的记忆方法对遗忘规律进行了定量研究，据此回答下列问题	（1）实验使用的材料是什么?	（1）实验使用的材料是无意义音节∶若干字母组成、能够读出、但无内容意义，即不是词的音节。这种音节是由一个元音、两边各一个辅音构成，如 XIQ。	艾宾浩斯的遗忘曲线研究中，他使用了单词列表作为记忆材料。具体来说，他选择了一系列的单词，并要求自己重复这些单词以进行记忆。通过这种方式，他观察了自己在不同时间间隔后对这些单词的记忆情况，从而得出了遗忘随时间推移呈现的特定模式，即现在所知的艾宾浩斯遗忘曲线。	实验使用的材料主要是一系列被试记忆的单词或数字序列。这些材料被重复呈现给被试，然后通过不同的时间间隔进行记忆和回忆测试，以便研究遗忘规律。 回答结束	tie	tie	tie
艾宾浩斯以自己为被试，采用机械重复的记忆方法对遗忘规律进行了定量研究，据此回答下列问题	（2）测量记忆保持量的指标是什么？	(2）测量记忆保持量的指标∶重新学习节省的时间或次数。实验采用节省法，即学习材料到一次恰能成诵时，间隔一段时间再重新学习，达到同样能背诵的程度，然后比较两次学习所用的时间和诵读次数。节省的百分数=（初学时间-重学所用时间）/初学所用时间×100%。	在艾宾浩斯遗忘曲线的研究中，测量记忆保持量的指标主要是通过计算记忆单元在不同时间间隔内的遗忘率。艾宾浩斯通过自己作为被试，使用机械重复的记忆方法，记录了他在不同时间间隔后能否正确回忆起记忆单元的结果。 具体来说，艾宾浩斯的遗忘曲线显示了随着时间的推移，记忆的强度会逐渐下降。例如，如果艾宾浩斯最初学习了一个单词，他会在一段时间后（比如5分钟、30分钟、1小时等）尝试回忆这个单词。通过记录这些回忆的成功率，他可以得出在不同时间间隔后，记忆保持的强度如何。 例如，如果艾宾浩斯在最初学习单词时的成功率是100%，但在5分钟后成功率下降到90%，那么这就意味着在5分钟内，他的记忆保持量下降了10%。同样的，30分钟后可能会再次进行测试，发现成功率进一步下降到70%。通过这种方式，艾宾浩斯可以计算出在不同时间间隔内的遗忘率，从而了解记忆保持量的变化。	对于测量记忆保持量的指标，通常可以使用遗忘曲线来进行分析。遗忘曲线显示了在学习后经过一段时间后，记忆的保持情况。通常使用的指标是遗忘的速度和遗忘的数量。通过测量在学习后经过一段时间后被遗忘的信息量，可以更好地了解记忆的保持情况。 举例来说，如果一个被试在学习了一组单词后，在学习之后的一天能够回忆出80%的单词，而在学习之后的一周只能回忆出50%的单词，那么可以通过这些数据来分析遗忘的速度和数量，从而得出关于记忆保持量的结论。 回答结束.	a	a	a
艾宾浩斯以自己为被试，采用机械重复的记忆方法对遗忘规律进行了定量研究，据此回答下列问题	（4）实验的结论是什么?	4）实验结论∶遗忘在学习之后立即开始，保持和遗忘都是时间的函数。遗忘进程是不均衡的，表现为先快后慢，以后逐渐平缓。	艾宾浩斯的遗忘曲线研究是心理学领域的一个经典实验，它揭示了记忆的持久性随时间的变化规律。通过自己作为被试，艾宾浩斯使用了机械重复的记忆方法来学习一系列单词，并记录了随时间的不同间隔重复学习这些单词时的遗忘率。 实验的结论是，遗忘并不是随机发生的，而是遵循了一定的规律。艾宾浩斯发现，遗忘率在学习初期较高，随着时间的推移，遗忘率会逐渐下降，但随后会出现遗忘曲线的复苏现象，即遗忘率会再次上升。这种曲线形状被称为艾宾浩斯遗忘曲线。 具体来说，艾宾浩斯发现，最初的遗忘曲线呈现出一种指数型下降，随着时间的推移，遗忘率逐渐减少。然而，当经过一定的时间间隔（通常是7天或更长时间）后，遗忘曲线会出现复苏，遗忘率会再次上升。这表明，间隔重复学习能够有效地减少遗忘，并且这种效果会随着时间的推移而变得更加显著。 艾宾浩斯的研究揭示了记忆的持久性与复习之间的关系，为后续的记忆和学习理论提供了重要的基础。	实验的结论是，遗忘的速度并非一成不变，而是在学习之后的一段时间内遵循特定的规律。艾宾浩斯发现，刚学习完的信息在接下来的20分钟内遗忘最快，之后遗忘速度逐渐减缓。在学习后的第一天，遗忘速度也比较快，之后逐渐减缓，但是在学习后的第二天开始，遗忘速度又会加快。这种遗忘曲线被称为艾宾浩斯遗忘曲线，对于记忆的保持和巩固具有重要的启示意义。 回答结束.	a	a	b
	简述内部言语的含义及特点	1）内部言语是在思维活动过程中一种自问自答或不出声的言语活动。它是在外部言语的基础上产生的。内部语言虽不直接用来与别人交际，但是，它是人们语言交际活动的组成部分。当人们计划自己的外部言语时，内部语言常常起着重要的作用。（2）内部言语的特点∶①隐蔽性∶内部言语是一种不出声的言语形式，但是言语器官发出的动觉信号在内部言语中起着重要作用。比如打腹稿，在头脑中规划某事时需使用内部言语。②简略性∶内部言语不是用来直接交际的，它不存在别人是否理解的问题，因而常以十分简略的、概括的形式出现，具有不连贯、不完整、不受语法规则约束的特点。	内部言语，也被称为自言自语，是指人们在内心进行的无声的思考过程。它是我们与自我沟通的一种方式，涉及到对自己的情感、想法、记忆和计划的反思。内部言语的特点主要包括： 1. 自然性：内部言语是自发的，不受外界直接控制。它通常是无意识的，人们在进行内部言语时往往不自觉地进行。 2. 多样性：内部言语可以包含各种内容，包括对当前环境的感知、对过去事件的回忆、对未来的计划、对自我的评价、情感的表达等。 3. 速度快：内部言语的速度远远快于外部言语。研究表明，内部言语的速度可以达到每秒钟100至200个单词，而外部言语的速度通常在每秒钟5至7个单词左右。 4. 不可见性：内部言语是无声的，无法被他人直接听到，因此在社会交往中通常被视为私人信息。 5. 功能性：内部言语在我们的认知过程中扮演着重要角色。它帮助我们组织思维、解决问题、记忆信息、情绪调节等。 举例来说，当你在准备一个重要的演讲时，你可能会…	内部言语是指人们在脑海中自我对话的过程，通常是在没有发出声音的情况下进行。内部言语可以是一个人在思考、解决问题或者自我激励时的一种表现。它通常是以语言的形式出现，有时候也可能是以图像或符号的形式存在。内部言语的特点包括：个体化、私密性、自我监控、思维引导等。 举例来说，一个人在解决问题时可能会不自觉地用内部言语来思考问题，找出解决方案。另外，一个人在自我激励时也会通过内部言语来给自己打气，增强信心。 回答结束	a	a	a
	简述心理测验编制的基本过程	心理测验是根据一定的法则和心理学原理，使用一定的操作程序给人的认知、行为、情感的心理活动予以量化。心理测验编制的基本过程∶①确定测验目的，明确对象、测量目标和测量用途。明确测量对象就是以年龄、性别、职业等人口学特征确定要测量的个人和团体。明确测量目标就是确定测量何种心理特质。明确测量的用途就是明确测量的功能，如描述被试的心理特质、诊断心理状况等。②拟定编制计划，确定测验的构思。要明确测验的内容，使测验的内容全面而具有代表性，不致偏离应测的范围，并要明确各个内容的相对重要性。③编辑测验题目，收集资料，确定形式，编写题目。④预测与项目分析。对预测的基本要求是对象要有代表性、预测情境力求与正式测试一致、预测时间可以延长，以保证受测者完成测验题目、应对预测中受测者的反应给予记录。项目分析就是对预测结果的统计分析，以确定项目的难度和区分度。⑤合成测验，把预测后有价值的项目排成有组织的量表。⑥测验标…	心理测验编制的基本过程通常包括以下几个步骤： 1. 确定测验目的：首先需要明确测验的目的和目标。例如，是为了评估个体的认知能力、情绪状态还是人际关系技能。 2. 确定测验内容：根据测验目的，选择或开发相关的题目和任务。例如，如果是评估数学能力，可能会包括算术、几何、代数等题目。 3. 设计题型：确定测验题目的类型，例如选择题、填空题、判断题、案例分析等。题型的选择应符合测验目的和内容。 4. 试题编写：根据设计的题型，编写具体的试题。确保每个试题都能有效地测量目标能力，并且尽量减少语言或文化偏见。 5. 试题验证：将编写好的试题进行验证，确保它们的有效性和可靠性。这通常包括对试题的内容、结构和统计性质的评估。 6. 试运行：在特定人群中进行试运行，收集数据并进行分析。分析可能包括试题的难度、区分度、以及是否存在偏差。 7. 修订和优化：根据试运行的结果，对试题进行修订和优化，确保测验的有…	心理测验编制的基本过程通常包括以下几个步骤： 1. 确定测试的目的和内容：首先需要明确测试的目的是什么，是用于评估个体的智力水平、人格特质还是其他心理特征。然后确定测试的内容，包括测验项目的种类、数量和难度等。 2. 制定测验项目：根据测试的目的和内容，设计出一系列能够准确评估被试者心理特征的测验项目。这些项目可以是选择题、问答题、观察记录等形式。 3. 试题初步筛选：将设计出来的测验项目进行初步筛选，确保试题的有效性和准确性。可以通过专家评审、试题统计分析等方法进行筛选。 4. 实地测试：在一定数量的被试者身上进行实地测试，收集测试数据。这一步骤能够帮助评估试题的难度、区分度和信度等指标。 5. 数据分析和修订：通过对测试数据的分析，评估测试的质量和效度。根据分析结果，对试题进行修订和改进，确保测验的准确性和可靠性。 6. 编制测验说明书：最后，根据测试的目的和内容，编制出详细的测验说…	a	b	a
	简述加德纳的多元智力理论。	美国心理学家加德纳提出多元智力理论，认为∶智力是多元的，它由多种智力成分构成。每一种智力依据某-社会对它的需要、奖赏以及它对社会的作用，其价值也不同。每种智力都是一个单独的功能系统，这些系统可以相互作用，产生外显的行为。八种智力成分包括∶言语智力，渗透在所有语言能力之中，包括阅读、写文章以及日常会话能力。大脑的布洛卡区负责产生合乎语法的句子。逻辑-数学智力，包括数学运算与逻辑思维能力，如做数学证明题及逻辑推理。空间智力，包括导航、认识环境、辨别方向的能力，如查阅地图等。大脑的右半球掌管空间位置的判断。音乐智力，包括对声音的辨别与韵律表达的能力，如拉小提琴或写一首曲子等身体运动智力，包括支配肢体完成精密作业的能力，如打篮球、跳舞等。社交智力，包括与人交往且能和睦相处的能力，如理解别人的行为、动机或情绪。自知智力，认识自己并选择自己生活方向的能力。自然智力，包括认识感知自然界事物的各种能力，…	加德纳的多元智力理论是由哈佛大学的心理学家霍华德·加德纳（Howard Gardner）在1983年提出的一种关于智力的理论。根据这个理论，智力不仅仅是单一的、可以衡量的能力，而是由多种不同的认知能力组成的。加德纳提出了七种主要的多元智力类型： 1. 言语智力（Linguistic Intelligence）：这是一种处理语言的能力，包括阅读、写作、讲话和理解语言的能力。例如，作家、演说家和记者通常具有较高的言语智力。 2. 数学智力（Logical-Mathematical Intelligence）：这涉及到逻辑推理、数学概念和抽象思维。数学家、科学家和工程师通常在数学智力上表现出色。 3. 空间智力（Spatial Intelligence）：这包括理解和操作空间关系的能力，如视觉化、方向感和空间安排。建筑师、艺术家和舞者通常具有较高的空间智力。 4. 身体-运动智力（Bodily…	加德纳的多元智力理论认为人的智力不仅仅体现在传统的智商测试中，而是涵盖了多个领域。他提出了八种不同的智力类型，分别是语言智力、逻辑数学智力、音乐智力、空间智力、运动智力、人际关系智力、内省智力和自然观察智力。每个人在这些智力类型上的表现都会有所不同，因此不能仅通过传统的智商测试来评价一个人的智力水平。例如，有些人可能在音乐方面表现出色，而在逻辑数学方面较弱，这并不代表他们的智力就低于其他人。 回答结束	b	b	a
	简述认知结构学习理论与认知建构学习理论的主要区别	认知结构理论∶布鲁纳认为，学习的本质是主动形成认知结构。学习包括三个几乎同时发生的过程∶（1）习得新信息。（2）转换，把知识整理成另一种形式，以便超越所给予的信息。（3）评价，学生不是被动的知识接受者，而积极的信息加工者。认知建构学习理论∶强调人是通过自我的知识而进行学习的。学习是通过对某种社会文化的参与而内化相关的知识的技能、掌握有关的工具的过程，这一过程需要通过学习共同体的合作互动来完成。知识是不可能脱离活动情境而抽象存在，应该与情境化的社会实践活动结合起来。建构主义还强调学生经验世界的丰富性和差异性。教学不能无视学生的经验，教学要为学生创设学习环境和提供支持，促进学生自身建构意义以及解决问题的活动。认知结构学习理论和认知建构学习理论的区别主要表现在∶（1）学习的实质不同∶认知结构学习理论认为知识是对现实世界的表征;认知建构学习理论认为知识只是对客观现实的较为可靠的解释或假设，会随着…	认知结构学习理论（Cognitive Structure Theory）和认知建构学习理论（Cognitive Constructivist Theory）是两种不同的学习理论，它们在学习过程的核心假设和教学方法上有显著的区别。 认知结构学习理论认为学习者的心理结构（如知识网络、概念框架等）是固定的，需要通过外部信息来修改和补充。这种理论认为教师应该提供正确的信息和指导，以帮助学习者构建和调整他们的认知结构。这种方法强调教师的角色是提供知识和指导，学习者则是接受者。 相反，认知建构学习理论认为学习者的心理结构是动态的，通过经验和活动不断构建和重构。这种理论认为学习者应该通过探索和解决问题来构建自己的知识，而不是简单地接受教师的信息。这种方法强调学习者主动参与的角色，教师则是提供资源和支持的引导者。 举例来说，如果我们考虑一个学生学习新语言的过程，认知结构学习理论可能会建议教师直接教授正确…	认知结构学习理论强调学习者已有的认知结构对新知识的接受和理解起着重要作用。这种理论认为，学习者通过将新知识与已有的认知结构相结合，从而实现对新知识的学习。相比之下，认知建构学习理论则更加强调学习者通过建构新的认知结构来理解世界和学习知识。这种理论认为，学习者在学习过程中不仅仅是简单地接受新知识，而是通过自己的认知活动来建构新的认知结构。 举例来说，认知结构学习理论可能认为，一个学生在学习数学时会将新学习的概念与已有的数学知识相结合，从而更好地理解和掌握新知识。而认知建构学习理论则可能认为，学生在学习数学时会通过自己的思考和探索来建构新的数学概念和认知结构。 回答结束	b	b	b
	简述心理学实验研究的一般程序	心理学实验研究的程序一般包括∶（1）课题选择与文献查询。课题选择包含两层含义，一是选择研究领域，二是确定具体的研究课题。文献查阅有助于研究者对有关研究领域的情况有一个系统、全面的认识和了解，有助于研究者选择研究课题形成研究假设，有助于研究者进行研究设计，解释研究结果，撰写研究论文。（2）提出问题与研究假设。研究问题通常是在研读文献的基础上提供的，应是非常具体的问题。问题提出时，应该明确涉及的变量有哪些。研究假设是对提出的问题的初步回答，或者说研究假设是对研究问题可能的结论的一种预期。（3）实验设计与实施。实验设计就是确定整个实验方案，确定研究目的、研究对象、研究工具、何时研究等一系列问题。实验的实施包括;被试的取样、被试的分配，样本容量的确定、创建实验材料，确定研究工具、执行实验，获取数据。（4）数据处理与统计分析。通过各种研究方法收集到的数据，必须经过分析处理才能得出合适的结论。统计分…	心理学实验研究的一般程序通常包括以下几个步骤： 1. 研究问题的确定：首先，研究者需要明确研究的主题和研究问题。例如，研究者可能对人类记忆的机制感兴趣，或者想要探索某种特定情绪对行为影响的机制。 2. 文献回顾：在确定研究问题后，研究者会进行文献回顾，查找与研究问题相关的已有研究，以了解现有知识的边界，并为自己的研究提供理论基础。 3. 研究假设的提出：基于文献回顾，研究者会提出具体的研究假设。例如，如果研究者想要探索记忆的影响因素，他们可能会提出“记忆的准确性会受到信息重复的次数的影响”。 4. 实验设计：研究者需要设计实验，以便能够测试他们的假设。实验设计包括确定实验的独立变量（因素）、依赖变量（结果）、样本大小、以及实验的控制条件等。 5. 实验实施：在实验设计完成后，研究者会开始实施实验。实验可能包括心理测验、行为任务、情绪诱发等。实验过程中，研究者需要确保实验条件的控制和标准化…	心理学实验研究的一般程序包括以下步骤： 1. 确定研究问题：研究者首先要明确自己感兴趣的研究问题，确定研究的目的和假设。 2. 设计实验：研究者需要设计实验的具体方案，包括实验的操作定义、实验材料、实验程序等。 3. 招募受试者：研究者需要确定实验的受试者群体，并招募符合条件的受试者参与实验。 4. 进行实验：在实验中，研究者按照设计好的实验方案进行操作，记录实验结果。 5. 数据分析：实验结束后，研究者需要对实验数据进行分析，验证研究假设。 6. 得出结论：通过数据分析，研究者可以得出对研究问题的结论，解释实验结果。 7. 撰写报告：最后，研究者需要将实验结果整理成报告或论文，向学术界或公众发布研究成果。 通过以上步骤，心理学实验研究可以得出科学的结论，为心理学领域的研究和实践提供重要参考。 回答结束.	a	a	a
在一项典型的儿童前瞻记忆实验中，先向儿童介绍一个叫嘟嘟的鼹鼠玩偶，并告诉儿童∶“鼹鼠嘟嘟有很多各式各样的图片，但它在白天看不到东西，现在就请你来帮助嘟嘟，把这些图片的名字读出来，但是嘟嘟很害怕动物（如牛、狗、猪、马）。所以，如果你发现了动物的图片，就把它们藏起来。请根据该实验任务的描述，回答下列问题∶	（1）该实验中前瞻记忆的任务是什么?衡量的指标是什么?	(1）前瞻记忆的任务∶被试是否根据指导语的要求将动物图片藏起来。衡量指标∶被试按照要求藏起所有动物图片的数量	在这项实验中，前瞻记忆的任务是要求儿童帮助嘟嘟鼹鼠玩偶记住和识别各种图片的名字，同时避免识别到动物图片。这个任务要求儿童在没有实际看到图片的情况下，依靠前瞻记忆来完成任务。 衡量的指标可能包括儿童在任务中正确识别图片名字的数量，错误识别（即将动物图片记错）数量，以及完成任务所需的时间。这些指标可以帮助研究者了解儿童的记忆能力和控制冲动（在这种情况下是避免识别动物图片）的能力。	在该实验中，前瞻记忆的任务是让儿童在听到问题后预先记住并识别特定类型的图片，并在后续任务中根据指示将这些特定类型的图片藏起来。衡量的指标可以包括儿童成功识别和隐藏动物图片的数量和准确性，以及完成任务的时间和策略选择等。 回答结束。	tie	tie	tie
在一项典型的儿童前瞻记忆实验中，先向儿童介绍一个叫嘟嘟的鼹鼠玩偶，并告诉儿童∶“鼹鼠嘟嘟有很多各式各样的图片，但它在白天看不到东西，现在就请你来帮助嘟嘟，把这些图片的名字读出来，但是嘟嘟很害怕动物（如牛、狗、猪、马）。所以，如果你发现了动物的图片，就把它们藏起来。请根据该实验任务的描述，回答下列问题∶	(2)该实验属于哪种类型的前瞻记忆实验?	(2）前瞻记忆可以分为基于事件的前瞻记忆、基于时间的前瞻记忆和基于活动的前瞻记忆。基于事件的前瞻记忆是指当某个特定的目标事件出现时去执行某个行为的回忆。基于时间的前瞻记忆是指对在某个特定的时间去执行某个行为的记忆。基于活动的前瞻记忆强调的是个体所从事的活动，是指人们在完成当前活动之后或之前去执行前瞻记忆任务，例如，要一个孩子在做完作业后去商店买东西等。本题要求被试看到图片藏起来，属于基于事件的前瞻性记忆	该实验属于隐蔽性记忆实验的类型。隐蔽性记忆实验是一种前瞻记忆实验，其中实验者会向参与者展示一系列物品或信息，并要求他们记住这些信息，但在某些情况下，参与者可能被告知忽略或隐藏某些特定类型的信息。这种实验设计允许研究者探索参与者如何在没有明确指导的情况下处理和记忆信息。 在这个特定的实验中，儿童被要求帮助嘟嘟鼹鼠玩偶记住各种图片的名字，同时避免记住动物图片。这种任务要求儿童在没有明确指导的情况下，自主地决定哪些信息是重要的，哪些应该被忽略或隐藏，这正是隐蔽性记忆实验的典型特征。	回答: (2) 该实验属于事件相关潜在记忆实验。在这个实验中，儿童被要求记住在特定条件下出现的事件（例如，动物的图片），并在未来的时间点进行回忆。通过这种实验设计，研究者可以了解儿童在特定条件下的前瞻记忆能力和表现。 回答结束.	b	b	a
	简述晶体智力和流体智力的含义，并说明这两种智力的发展趋势。	（1）流体智力主要和神经生理的结构和功能有关，很少受社会教育影响，它与个体通过遗传获得的学习和解决问题的能力有联系。例如，瞬时记忆、思维敏捷性、反应速度、知觉的整合能力等。晶体智力则主要是后天获得的，受文化背景影响很大，与知识经验的积累有关，是流体智力运用在不同文化环境中的产物。例如，知识、词汇、计算等方面的能力，它包括大量的知识和技能，与学习能力密切联系。（2）晶体智力和流体智力的发展趋势。流体智力与晶体智力的发展是不同的，流体智力随生理成长曲线而变化，到二十岁时达到高峰，三十岁后逐渐下降;晶体智力在个体的一生中都会增长，二十五岁后逐渐增长缓慢。从个体差异上看，流体智力水平的差异要比晶体智力的差异大。晶体智力随着个体年龄的增长不断发展;流体智力发展到一定年龄阶段到达顶峰，此后，随着年龄的增长而降低。	晶体智力（Crystallized Intelligence）和流体智力（Fluid Intelligence）是两种在心理学中常被讨论的智力类型。它们分别由心理学家大卫·韦克利（David Wechsler）提出的。 晶体智力指的是个体在长期学习和生活中积累的知识、经验和技能的应用能力。它涉及到个体对现有知识体系的理解和运用，包括语言能力、社会理解、文化知识等。晶体智力通常随着年龄的增长而增强，因为它依赖于个体积累的经验和学习。例如，一个文学教授的晶体智力可能包括了广泛的文学知识和批判性分析能力，这些能力随着时间和经验的积累而变得更加成熟。 流体智力则是指解决新问题、适应新情况的能力，它涉及到抽象思维、空间关系理解、逻辑推理等。流体智力更多地反映了个体的认知能力和解决问题的能力，而不依赖于特定的知识或经验。流体智力通常在青春期达到高峰后会逐渐下降，因为它更多地依赖于大脑的认知功能，而这…	晶体智力和流体智力是心理学家雷蒙德·卡特尔提出的两种智力的概念。晶体智力是指通过学习和经验所积累的知识和技能，包括词汇量、数学能力、文化知识等。而流体智力则是指处理新问题和新情况的能力，包括逻辑推理、问题解决能力等。 晶体智力在个体成长过程中通常随着年龄的增长而增加，因为随着经验的积累，个体的知识和技能也会增加。而流体智力在青少年时期达到巅峰，然后逐渐下降，因为随着年龄增长，大脑对新问题和新情况的处理能力会逐渐减弱。 总的来说，晶体智力和流体智力在个体成长过程中相辅相成，共同构成了个体的智力水平。而晶体智力的发展趋势是逐渐增加，而流体智力的发展趋势则是在青少年时期达到顶峰后逐渐下降。 回答结束	b	b	b
	什么是社会助长与社会惰化?简要比较二者的异同	1）社会助长指人们在有他人旁观的情况下工作表现比自己单独进行时好的现象，即他人在场促进了个体工作绩效。社会惰化指在团体中由于个体的成绩没有被单独加以评价，而是被看作一个总体时所引发的个体努力水平下降的现象，即在群体中个体努力水平下降的现象。（2）社会助长和社会惰化的比较。共同点∶两者都是指由于他人在场对个体行为产生影响。不同点∶社会惰化和社会助长是产生于不同的情境之中的，在社会助长情境中，个体是他人影响的唯一目标，所有的社会影响均指向该个体，当在场的他人增加时，社会影响也增加;而社会惰化现象则发生在团体成员完成团体外他人指定的作业时，每一个个体仅仅是外人影响的目标之一，外人的社会影响会分散到每一个体身上，随着团体规模的增加，每一个体感受到的压力随之降低	社会助长（Social Enablement）和社会惰化（Social Disablement）是两种描述社会因素对个体健康状态影响的概念。社会助长指的是那些促进个体健康、增强其功能和能力的社会因素。这些因素可以包括良好的教育、经济资源、社会支持网络、健康的生活环境等。相反，社会惰化则是指那些削弱个体健康、限制其功能和能力的社会因素。这些因素可能包括贫困、缺乏教育、社会排斥、不安全的居住环境等。 社会助长和社会惰化的主要区别在于它们对个体健康的影响方向。社会助长有助于提升个体的健康水平和生活质量，而社会惰化则可能导致健康问题的产生或加剧。例如，一个个体如果生活在一个经济稳定、教育资源丰富的社会中，他或她更有可能获得良好的健康状况和更高的生活满意度。这就是社会助长在起作用。相反，如果一个个体生活在一个资源匮乏、社会支持不足的环境中，他或她可能会面临更多的健康挑战，这就是社会惰化在起作用。 …	社会助长和社会惰化是心理学中关于社会影响力的两个概念。 社会助长是指社会环境对个人的积极影响，能够激励和促进个体的发展和成长。例如，当一个人身处一个积极向上的社会群体中，会受到他人的鼓励和支持，从而激发自己的潜能，取得更好的成绩。 社会惰化是指社会环境对个人的消极影响，会导致个体变得懒惰和消极。例如，当一个人身处一个消极的社会环境中，可能会受到他人的负面影响，失去动力和目标，导致自我放弃和消极行为。 异同： 1. 异同点在于社会助长和社会惰化都是指社会环境对个体的影响，但一个是积极的影响，一个是消极的影响。 2. 社会助长会促进个体的成长和发展，而社会惰化则会阻碍个体的进步和发展。 3. 社会助长可以激励个体取得更好的成绩，而社会惰化则可能导致个体产生消极行为和态度。 总的来说，社会助长和社会惰化都体现了社会环境对个体的重要影响，但一个是正面的影响，一个是负面的影响。 回答结束	tie	tie	tie
	什么是概念转变?根据波斯纳（G.J.Posner）的观点，影响概念转变的基本条件有	1）概念转变是认知冲突的引发和解决过程，学习者原有的某种知识经验由于受到与此不一致的新经验的影响而发生的重大改变。错误概念的转变是新、旧知识经验相互作用的集中体现，是新经验对已有经验的影响和改造。（2）原有概念发生转变需要满足的基本条件∶对原有概念产生不满，只有当学生发现自已相信的概念已经不起作用时，他们才会愿意去改变这种概念。让学习者看到原有概念所无法解释的事实（反例），从而引发他们的认知冲突，这可以有效地导致对原有概念的不满。新概念的可理解性，学习者需要懂得新概念的真正含义，而不仅仅是字面的理解，他需要对新概念形成整体的理解和深层的表征。新概念的合理性，学习者感到新概念看起来是合理的，这意味着新概念与个体所接受的其他概念、信念是相互一致的，不存在什么冲突，它们可以一起被重新整合。学习者看到了新概念的合理性，意味着他相信新概念是对的。新概念的有效性，学习者还需要看到新概念对自己的价值;…	概念转变（Conceptual Change）是指个体在现有认知框架基础上形成新的认知结构的过程。这种转变通常涉及对现有知识体系的挑战和重构，可能是由于新信息的接触、新经验的积累，或者是对现有知识的反思和批判。 波斯纳（G.J.Posner）在其研究中提出了影响概念转变的几个基本条件： 1. **认知冲突**：当个体遇到与现有概念不一致的信息时，会产生认知冲突。这种冲突是概念转变的动力，促使个体寻求新的解释和理解。 2. **认知灵活性**：个体需要具备灵活地调整现有概念的能力，以适应新的信息和观点。认知灵活性是概念转变的关键因素。 3. **社会支持**：来自社会的支持和鼓励可以增强个体进行概念转变的动力。例如，同伴或导师的正面反馈可以帮助个体克服对新概念的抵触。 4. **情感投入**：个体对新概念的情感态度也会影响其转变的可能性。积极的情感态度可以促进概念转变，而消极的情感态度则可…	概念转变是指一个人对某一概念或观念的认知发生变化的过程。根据波斯纳（G.J.Posner）的观点，影响概念转变的基本条件包括：认知冲突、信息的可理解性、信息的可接受性、认知过程的个体因素等。 认知冲突是指个体对于现有概念或观念与新信息之间的矛盾感知，这种冲突会促使个体重新评估自己的认知结构，从而引发概念转变。信息的可理解性指新信息是否能够被个体理解和接受，如果信息过于复杂或抽象，可能会影响概念转变的发生。信息的可接受性则指新信息是否与个体的价值观和信念相符，如果新信息与个体原有的认知框架相违背，可能会阻碍概念转变的进行。认知过程的个体因素则包括个体的认知能力、学习经验、情感态度等因素，这些因素会影响个体对新信息的接受和理解程度。 总的来说，概念转变是一个复杂的认知过程，受到多种因素的影响。只有当认知冲突得到有效解决，新信息易于理解和接受，并且个体具备相应的认知能力和学习经验时，概念转变才…	b	b	b
	简述一篇心理学研究报告的主要组成部分。	心理学实验报告包括∶（1）论文题目，题目是为了让读者了解一篇文章的基本内容，因此必须简洁明了。它应该是对论文的主要观点的概括性总结，包括所研究的变量（即自变量和因变量）以及它们之间的相互关系。（2）摘要和关键词，关键词是文章要点，摘要是对论文内容的简短而全面的概括，能够让读者迅速总览论文的内容，是对研究的目的、所用的方法、得到的结果和结论做一简短的叙述。（3）引言或问题的提出，往往包括提出问题、说明研究背景、阐明研究目的和理论基础这三部分内容。（4）方法，被试、材料、程序（或步骤）、设计，要详细描述研究是如何进行的，说明对变量的处理过程。这部分一定要写得清楚、完整，尽量告诉读者他们需要知道的每件事。这样的描述可以使读者对论文的方法的适当性以及结果的可靠性和有效性（即信度和效度）进行评价，也可以使感兴趣的研究者能够重复这个研究。通常方法部分被分成三个带标题的层次，包括被试、仪器（或材料）及…	一篇心理学研究报告的主要组成部分通常包括以下几个部分： 1. **标题页**：包含报告的标题、作者姓名、机构名称、提交日期等基本信息。 2. **摘要**：简要概述研究的目的、方法、主要发现和结论。通常在一页内，旨在为读者提供研究的快速概览。 3. **引言**：介绍研究的背景、现有文献、研究问题和研究目的。通常会阐述研究的重要性和研究问题的意义。 4. **方法**：详细描述研究的设计、样本选择、数据收集和分析方法。确保报告的可重复性和透明度。 5. **结果**：展示研究数据的统计分析结果，通常以图表和表格的形式呈现。结果部分应该客观、准确，避免对结果进行解释。 6. **讨论**：解释结果的意义，讨论结果与现有文献的关系，分析研究的局限性和可能的应用。 7. **结论**：总结研究的主要发现，并提出研究的意义和对未来的建议。 8. **参考文献**：列出在研究中引用的所有文献，按照…	心理学研究报告通常包括以下主要组成部分： 1. 摘要：对研究的目的、方法、结果和结论进行简明扼要的总结。 2. 研究背景：介绍研究问题的来源和重要性，以及相关的先前研究。 3. 研究问题：明确阐述研究的目的和假设。 4. 方法：描述研究的参与者、材料、程序和数据分析方法。 5. 结果：呈现研究的主要发现，通常通过文字、表格或图表展示。 6. 讨论：解释研究结果的意义，讨论研究的局限性和未来研究的方向。 7. 结论：总结研究的主要发现和对研究问题的回答。 8. 参考文献：列出研究中引用的相关文献。 9. 附录：包括研究中使用的附加材料，例如调查问卷或实验任务。 回答结束。	a	a	a
	简述心理旋转现象及其实验逻辑。	1）20世纪70年代库柏和谢帕德用减法反应时实验证明了心理旋转的存在。Cooper等人用不同倾斜角度的正和反（镜像）的字母，如非对称性字母或数字R、J、2、5等来研究表象的旋转。实验结果表明，当图片旋转180°时，无论正反，反应时最长，而当图片旋转0°的时，反应最短。这说明被试在辨别图形时，需要将头脑中贮存的图形表象进行旋转，随着角度增加，反应时也随着延长，二者之间呈线性关系。（2）心理旋转实验的逻辑心理旋转的实验逻辑就是减法反应时的实验逻辑∶如果一种作业包含另一种作业所没有的某个特定的心理过程，且除此之外二者在其他方面均相同，那么这两种反应时的差即为此心理过程所需时间。在心理旋转实验中，除了被知觉对象需要心理旋转的角度不同外，别无差异，两者的反应时之差就是通过心理旋转来消除两者角度差所需的时间。如发现两个任务的反应时确有差异，而且这种差异和两个任务之间的角度差呈正比关系，就可证明心理旋…	心理旋转现象，也称为“Ebbinghaus illusion”或“Titchener circles”，是一种视觉错觉现象，指的是当两个圆形图形大小相似，但周围环境不同时，人们会错误地感知其中一个圆形比另一个圆形大。这种现象是由德国心理学家赫尔曼·艾宾浩斯（Hermann Ebbinghaus）在1889年首次描述的。 实验逻辑通常涉及以下步骤： 1. 研究者准备两个大小相似的圆形图形，并将它们放在不同的背景上。一个圆形置于其他圆形周围的背景上（背景圆），而另一个圆形置于单色背景上（单色圆）。 2. 参与者被要求比较两个圆形的大小，并报告哪个圆形看起来更大或更小。 3. 结果通常显示，大多数参与者会错误地感知背景圆看起来更小，而单色圆看起来更大，即使两个圆形实际上大小相同。 这种现象揭示了视觉感知在大多数情况下依赖于环境因素，人们的感知可能会受到周围环境的影响。心理旋转现象在视觉心理学和…	心理旋转现象是指人们在进行认知任务时，对旋转的物体进行认知和操作的能力。实验逻辑通常是让参与者进行一些任务，比如判断两个物体是否相同（旋转了多少度）、将一个物体与其旋转后的物体进行匹配等。通过参与者的表现，可以了解他们在心理旋转方面的能力。实验结果表明，人们在心理旋转任务中的表现会随着旋转角度的增加而变差，但通常仍能保持一定水平的准确性。 举例来说，一项经典的心理旋转实验是Shepard和Metzler（1971）的研究。在这个实验中，参与者需要判断两个物体是否相同，其中一个物体是另一个物体的旋转版本。结果显示，参与者在判断两个物体是否相同时，会随着旋转角度的增加而反应时间延长，这表明了心理旋转现象的存在。 回答结束.	b	b	b
	简述斯腾伯格（S.Stemberg）关于短时记忆信息提取方式的三种假设及研究结果。	斯腾伯格在实验中给被试呈现1~6个不等的数字系列，如5，2，9，4，6，之后马上再呈现一个探测数字，要求被试判断探测数字刚才是否出现过，并作出肯定或否定的反应。斯腾伯格短时记忆中被试对项目的提取有三种假设∶①平行扫描∶指同时对短时记忆中保存的所有项目进行提取。如是这样，无论短时记忆中保存的项目有多少，提取的时间都应该是一样的。②自动停止系列扫描∶指对项目逐个进行提取，一旦找到目标项目就停止查找。这样，短时记忆中保存的项目越多，反应时间就会越长。另外，由于是反应不需要再对剩余项目进行检索，因此是反应时间要比否反应时间短。③完全系列扫描∶指对全部项目进行完全检索，然后判断。在这种提取方式下，但由于是反应和否反应都要对全部项目进行搜索，因此应该具有同样的反应时间。（2）研究结果短时记忆项目的提取方式是完全系列扫描	斯腾伯格（S. Sternberg）关于短时记忆信息提取方式的三种假设主要涉及在短时记忆中检索单个信息点、多个信息点以及判断信息点是否属于某个集合的过程。斯腾伯格的研究主要集中在短时记忆的检索过程上，特别是如何在短时记忆中检索和提取信息。 1. 单一信息检索假设（Single-item search hypothesis）: 这个假设认为检索单个信息点的过程是直接的，短时记忆中的信息点会被逐个检索，直到找到匹配的信息点。斯腾伯格的研究表明，检索单个信息点的过程是线性的，检索速度会随着短时记忆中信息点的增加而减慢。 2. 多信息检索假设（Multiple-item search hypothesis）: 在这个假设中，斯腾伯格认为检索多个信息点的过程是逐个比较的，短时记忆中的信息点会被逐个与检索目标进行比较，直到找到所有匹配的信息点。研究结果显示，检索多个信息点的过程比检索单个信息点的过程…	斯腾伯格提出了三种关于短时记忆信息提取方式的假设：分别是更早假设、更后假设和更准确假设。更早假设认为在信息存储的早期阶段就会进行信息提取；更后假设认为信息提取发生在信息存储的后期；更准确假设则认为信息的提取不仅发生在存储的早期和后期，同时也会发生在存储的整个过程中。 研究结果显示，不同类型的信息在短时记忆中的提取方式会有所不同。比如，一些研究表明，在识别数字时更早假设更为适用，而在记忆文字时更准确假设更为合适。这表明短时记忆信息提取方式可能会受到被存储信息的类型的影响。 回答结束.	a	a	a
	简述编制心理测验量表时制定常模的步骤	1）确定测验将应用于哪部分群体。根据测验群体，选定最基本的统计量，决定抽样误差的允许界限，在此基础上设计具体的抽样方法，并对该群体进行抽样，得到常模团体。（2）对常模团体进行施测，并获得该团体成员的测验分数及分数分布。（3）确定常模分数类型。把原始分数转化为量表分数，制作常模量表，给出抽取常模团体的书面说明、解释指南等。	编制心理测验量表时制定常模是一个重要的步骤，它涉及到以下几个关键步骤： 1. 确定测量目标：首先，研究者需要明确测验量表旨在测量的心理特征或行为。例如，如果是情绪量表，可能会关注测量个体的情绪状态，如焦虑、抑郁或愉悦。 2. 量表开发：根据测量目标，开发一系列相关的项目或题目。这些项目应该能够反映出个体在特定心理特征上的表现。例如，情绪量表可能包括描述焦虑或抑郁情绪的陈述。 3. 数据收集：通过问卷调查或实验等方式收集数据。通常会选择一个大样本群体来确保量表的普适性。 4. 数据分析：对收集到的数据进行统计分析，通常会使用因子分析等方法来确定量表的有效性和一致性。这个过程可以帮助研究者确定哪些项目是真正有效地测量目标心理特征的。 5. 常模建立：根据分析结果，选择一个代表性的子群体作为常模。这个子群体应该具有足够的样本大小，并且在心理特征上与总体样本具有代表性。常模可以是平均分、百分位数…	回答: 编制心理测验量表时制定常模通常需要经过以下步骤： 1. 确定测验目的：首先需要明确测验的目的是什么，是用于评估人格特征、智力水平还是其他方面。 2. 确定测试内容：根据测验目的，确定需要评估的具体内容和要素，设计相应的题目或者项目。 3. 选择样本：选择一定数量和类型的被试者进行测试，确保样本具有代表性。 4. 进行试测：在一部分样本上进行初步测试，对测试内容和题目进行修订和完善。 5. 进行正式测试：在全样本上进行正式测试，收集数据。 6. 统计分析：对收集到的数据进行统计分析，包括计算平均分、标准差等指标。 7. 制定常模：根据统计结果，确定不同分数段的划分标准，制定常模。 8. 评价和修订：常模制定完成后，需要不断评估和修订，确保其准确性和可靠性。 举例来说，如果一个心理测验是用来评估青少年的抑郁水平，那么在制定常模时就需要确定不同程度的抑郁水平对应的分数范围，以便能够客观…	tie	tie	tie
	用维纳（B.Weiner）归因理论分析能力和运气的归因属性	归因是指人们对自己或他人的活动及其结果以及其他社会事件的原因作出的解释或推论，维纳系统地提出了动机的归因理论∶（1）他把归因的维度划分为内部归因和外部归因、稳定性归因和不稳定归因、可控性归因和不可控归因等三个维度。（2）归因的内外源维度影响个体对成败的情绪体验，稳定性维度影响个体对未来成败的预期，可控性维度影响个体今后努力学习的行为。（3）能力、问题难度等是稳定的因素，环境、运气等是不稳定的因素。（4）若新的结果和过去的结果不同，常归因于不稳定因素;若一致则归因于稳定的因素。维纳认为个体对原因的解释是影响成功预期的重要因素，而归因对于成功预期的影响主要是通过稳定性维度来实现的。由上述理论可知，在维纳的归因理论中∶能力被认为是稳定的、内在的不可控的因素。把成功归结于自己的能力，会产生自信心、自豪感。如果一个人把自己的失败归于自己的能力低下，他就很容易引发沮丧的情绪。当把失败归结于能力，而且…	维纳（B.Weiner）归因理论是一种解释行为和结果的框架，它将归因过程分为内在因素（如能力、努力和意图）和外在因素（如运气、任务难度和环境条件）。根据维纳的理论，人们在解释自己的行为或结果时，倾向于选择那些能够提供稳定性和一致性的解释。 在分析能力和运气的归因属性时，我们可以将其分别归入维纳的归因理论中。能力通常被视为内在因素之一，它代表了个体在特定任务或情境中的潜在能力水平。能力的归因往往与稳定性和内在性相关联，意味着能力被认为是长期的、不可改变的特征。例如，如果一个人在考试中取得了好成绩，人们可能会归因于他的能力或学习能力，而不是运气。 另一方面，运气则被视为外在因素，它是不可预测的、短暂的，并且不受个体控制的。运气的归因往往与偶然性和外在性相关联，意味着结果是由外部因素决定的，而不是个体的内在特质。例如，如果一个人在一次游戏中幸运地获得了好结果，人们可能会归因于运气，而不是他的技…	根据维纳的归因理论，人们通常会将结果归因于能力、努力或运气这三个属性之一。在这种情况下，能力是指个体的技能、知识和经验，运气则是指外部因素或偶然事件的影响。当一个人取得成功时，如果他们将成功归因于自己的能力，那么他们可能会感到自豪和自信；如果他们将成功归因于运气，那么可能会感到侥幸或者不稳定。 因此，用维纳的归因理论分析能力和运气的归因属性时，可以看到个体在评价自己或他人的成功或失败时所偏向的因素。如果一个人倾向于将成功归因于能力而将失败归因于运气，那可能会导致自我评价的偏差。相反，如果一个人能够客观地看待自己和他人的能力和运气因素，并根据实际情况做出合理的归因，那么他们可能会更加客观和稳定地看待事情。 举例来说，一个学生考试取得好成绩时，如果他们将这个成功归因于他们的努力和能力，那么他们可能会更有动力继续努力学习；相反，如果他们将成功归因于运气，那么可能会缺乏长期的动力和决心。 回答结束	a	a	a
	简述应激状态下一般适应综合征的阶段及其表现	应激是指人对某种意外的环境刺激所做出的适应性反应。应激状态的产生与人面临的情境及人对自己能力的估计有关。当情境对一个人提出了要求，而他的意识到自己无力应付当前情境的过高要求时，就会体验到紧张而处于应激状态。简单的说，可以把应激理解为压力或刺激。人在应激状态下，会引起机体的一系列生物性反应，如肌肉紧张、血压、心率、呼吸以及腺体活动都会出现明显的变化，这些变化有助于适应急剧变化的环境刺激，维护机体功能的完整性。加拿大学者汉斯·塞里把这种变化称为一般适应综合症，并指出这种综合征包含动员、阻抗和衰竭三个阶段。（1）动员阶段是指有机体在受到外界紧张刺激时，会通过自身的生理机能的变化和调节来进行适应性的防御。（2）阻抗阶段是通过心率和呼吸加快、血压升高、血糖增加等变化，充分动员人体的潜能，以对付环境的突变。（3）衰竭阶段是指引起紧张的刺激持续存在，阻抗持续下去，此时必需的适应能力已经用尽，机体会被其…	应激状态下一般适应综合征（General Adaptation Syndrome, GAS）是由苏斯博士（Hans Selye）在20世纪初提出的一种对应激反应的理论模型。该模型描述了个体在面对压力时的生理和心理反应过程，通常分为三个阶段： 1. **应激反应的初期阶段（Alarm Reaction）**： 在这个阶段，个体首先感受到压力，身体会产生“警报反应”，即“战斗或逃跑”（fight or flight）的生理反应。心跳加快、血压升高、肌肉紧张、注意力集中等。这个阶段是身体对压力的快速反应，旨在帮助个体应对即时威胁。 2. **应激反应的抵抗阶段（Resistance Stage）**： 如果压力持续存在，个体会进入抵抗阶段。在这个阶段，身体会尝试适应压力，通过调节内分泌系统、免疫系统等机制来维持稳态。个体可能会表现出一种“战斗或逃跑”的状态，但这种状态可能会持续较长时间，导致身…	答：应激状态下一般适应综合征通常分为三个阶段：冲击阶段、防御阶段和疲劳阶段。 在冲击阶段，个体受到外界应激源的影响，可能会出现情绪激动、焦虑、恐惧等表现，身体也会有相应的生理反应，比如心跳加快、呼吸急促等。 在防御阶段，个体会试图应对应激源造成的压力，可能会出现逃避、否认、愤怒等行为，以减轻应激带来的不适感。 在疲劳阶段，如果应激源持续存在或者压力过大，个体可能会出现疲劳、消沉、失去动力等表现，甚至出现抑郁和焦虑症状。 举例来说，一个学生正面临着期末考试的压力，可能在冲击阶段表现为焦虑和紧张，进入防御阶段后可能会采取逃避学习或者否认考试的态度，最终在疲劳阶段可能会出现精神疲惫和学习动力下降的情况。 回答结束。	a	a	a
	什么是知识的表征?举例说明陈述性知识的表征方式	知识的表征指知识在头脑中的表示形式和组织结构。知识是通过个体与信息甚至是整个情境相互作用而获得的，个体一旦获得知识，就会在头脑中用某种形式和方式来代表意义，把它储存起来。例如，我们用狗这个词来代表那样一类擅长跑、嗅觉灵敏的动物，但有时说起狗，我们头脑就会浮现狗的形象。陈述性知识以概念、命题、命题网络、表象或图式表征来在头脑中表征。概念代表着事物的基本属性和基本特征，是一种简单的表征形式。如眼镜就包含了这样一些特征∶有两个圆镜片，有两条眼镜腿，用来矫正近视等等。表象是人们头脑中形成的与现实世界的情境相类似的心理图像。如，在判断大象比狮子大时，在短短的时间里，头脑中出现了大象和狮子的模样，并在头脑中将这两个表象进行比较，好像看到了这两个动物一样。命题是意义或观念的最小单位。用于表述一个事实或描述一个状态，通常由一个关系和一个以上的论题组成，关系限制论题。如在电脑坏了这一命题中，电脑是命题谈及…	知识的表征是指将知识从个体的头脑中转移到外部媒介上的过程。这种转移可以是通过语言、图像、符号或其他形式的符号系统来实现的。知识的表征有助于信息的传播、存储和检索，使得知识可以被多个个体共享和利用。 陈述性知识是指关于事实、概念、定义和一般原则的知识。陈述性知识的表征方式通常包括： 1. 语言表述：通过书面或口头的语言来传达知识。例如，科学理论、历史事件的描述、定义等。 2. 图表和图像：使用图表、图像、图形等视觉工具来展示数据和信息。例如，统计图表、地图、流程图等。 3. 符号和代码：使用特定的符号系统来表示知识，如数学公式、化学式、编程语言等。 举例来说，一个科学理论如“引力是万有引力定律描述的自然力”就是一种陈述性知识的表征。这个表征可以通过书面语言（如科学论文）、图表（如引力与质量的关系图）或数学公式（如F = G * (m1 * m2) / r^2）来呈现。	回答开始 知识的表征是指将信息或者经验转化为可被存储、处理、传递和使用的形式。陈述性知识的表征方式通常包括符号、概念、语言等形式。例如，将“狗是一种动物”的陈述性知识可以通过文字或者语言来表示，即用符号“狗”代表这种动物，用语言来表达这种关系。 回答结束	a	b	tie
	简述心理学实验中常用的五种控制额外变量的方法	额外变量又叫控制变量，是指实验研究中除所规定的自变量以外一切能够影响实验结果的变量。控制额外变量的方法∶（1）消除法∶通过一定的手段或措施，将影响研究结果的各种额外变量消除掉。比如，隔音室就是把噪音隔离，属于消除法。（2）恒定法∶采取一定的措施，使某些额外变量在整个研究过程中保持不变，从而使额外变量对所有被试的影响处于同样的水平，从而减少额外变量对实验结论的影响。（3）匹配法∶使实验组和控制组中的被试属性相等的一种方法。例如，进行练习对射击效果影响的实验研究时，先预测一下被试打靶的成绩，然后把两项预测成绩相等的被试分别分到实验组和控制组。（4）随机化法和抵消平衡法。随机化法是把被试随机地分派到各处理组中去的技术。抵消平衡法采取某些综合平衡的方法，是额外变量的效果的相互抵消，达到控制变量的目的。常见的有 ABBA法和拉丁方设计法。（5）统计控制法∶明知某种因素会影响实验结果，但在实验中无法…	在心理学实验中，控制额外变量是为了确保实验结果的有效性和可靠性。以下是五种常用的控制额外变量的方法： 1. 随机分配：在实验中，参与者被随机分配到实验组或对照组。这种方法可以减少由于参与者个体差异导致的混杂变量的影响。例如，一个研究可能使用随机分配将参与者分为接受新药物的组和接受安慰剂的组，以评估新药物的效果。 2. 对照组：使用一个没有接受实验处理的对照组来比较实验组的结果。对照组的存在有助于确定实验处理是否产生了实际的效果。例如，在研究新教学方法的效果时，可以设立一个没有接受新教学方法的对照班级。 3. 双盲实验：在双盲实验中，参与者和研究者都不知道谁属于实验组和对照组。这种方法可以减少偏见和期望效应的影响。例如，研究者可能在一个双盲实验中测试药物的效果，而参与者和研究者都不知道谁正在接受药物或安慰剂。 4. 统一操作：确保实验操作在所有参与者身上都是一致的。例如，在研究记忆力时，使…	1. 随机分组：在实验开始前，通过随机的方法将参与者分成不同的组别，以确保每组参与者的特征和背景信息基本一致，从而消除其他因素对实验结果造成的影响。 2. 随机分派处理：除了随机分组，实验中还可以通过随机的方式分配处理或条件，以保证每个参与者有相同的机会接受不同的处理，从而避免其他因素对研究结果的干扰。 3. 匹配设计：在实验中可以根据参与者的某些特征或背景信息，将他们进行匹配，然后再随机分组或分派处理，以确保不同组别之间的匹配度，从而控制其他变量的影响。 4. 控制变量法：在实验中可以通过固定某些变量的数值，或者采取相同的操作方法，来控制其他可能影响实验结果的变量，确保实验结果的可靠性和有效性。 5. 双盲设计：在实验中，研究者和参与者都不知道实验条件或处理的情况，以避免主观因素对实验结果的影响，从而控制其他变量的干扰。 回答结束	b	b	b
	什么是观察法?它有何优缺点?	观察法的含义观察法是指在自然条件下，对表现心理现象的外部活动进行有系统、有计划的观察，从中发现心理现象产生和发展的规律性。例如，观察儿童与同伴在做游戏时的行为表现，了解儿童与同伴的交往处在哪一发展阶段。观察法的优缺点1.观察法的优点有∶（1）适用范围较大。（2）简便易操作。（3）被观察者处于自然状态，因而获得的材料比较真实、全面。（4）对被观察者的行为进行直接的了解，因而能收集到第一手资料。（5）观察时行为发生和心理活动的整个过程处于进行状态，具有较多的时间信息，在观察的基础上比较有把握做出有关心理因果关系的推论。2.观察法的缺点有∶（1）在自然条件下，事件很难按严格相同的方式重复出现，因此，对某种现象难以进行重复观察，而观察的结果也难以进行检验和证实。（2）由于自然条件下，影响某种心理活动的因素是多方面的，因此观察法得到的结果很难进行精确的分析。（3）观察者缺少主动性，难以控制研究进程…	观察法是一种研究方法，主要用于社会科学和人文学科领域，尤其在心理学中广泛应用。这种方法涉及到对个体或群体的行为、动作、情感表达等进行直接观察。观察者可能是参与者本人，也可能是外部的观察者。观察可以是有意识的，也可以是无意识的，甚至可能是通过录像、录音等技术手段进行。 优点： 1. 直接性：观察法可以直接获取行为的原始数据，不需要依赖于个体的主观报告或记忆。 2. 多样性：通过观察，可以收集到多种类型的数据，包括非言语行为和言语行为。 3. 动态性：观察可以捕捉到行为的动态变化，包括时间序列和情境依赖性。 4. 实时性：观察可以在行为发生时进行，减少了回忆和报告可能带来的偏差。 缺点： 1. 主观性：观察者可能会因为自己的偏见、经验和文化背景而影响观察结果。 2. 难以控制：在自然环境中进行观察时，可能难以控制外部变量和干扰因素。 3. 难以量化：一些行为可能难以量化，特别是那些非言语的行…	观察法是一种心理研究方法，通过观察被研究对象的行为、动作、情绪等来获取数据和信息。这种方法可以直接观察到被研究对象的真实行为，较为客观地记录下来，避免了受访者主观性的干扰。观察法可以用于研究儿童行为、动物行为、人际关系等领域。 优点： 1. 客观性强：观察法可以直接观察到被研究对象的真实行为，减少了受访者的主观性干扰。 2. 准确性高：观察法记录下的数据较为准确，不会出现回忆偏差或虚假回答等问题。 3. 实时性强：观察法可以实时记录被研究对象的行为，不受时间间隔的影响。 缺点： 1. 可能存在观察偏差：观察者的主观因素可能会影响数据的收集和分析，导致观察结果不够客观。 2. 可能受环境因素影响：观察法容易受到环境条件的影响，如观察者的立场、观察环境等。 3. 难以观察心理活动：观察法难以观察到被研究对象的内心活动和思维过程，只能观察外在表现。 总的来说，观察法是一种有效的研究方法，但在实…	a	b	a
	简述句子理解的含义及影响因素。	1）句子理解的含义句子理解是指在字词理解的基础上，通过对组成句子的各成分的句法分析和语义分析，获得句子语义的过程。句子理解包含对句子的词语意义进行加工，其次进行句法分析，最后进行语义分析。（2）影响句子理解的因素句子的类型。句子类型主要有肯定句、否定句、被动句、被动否定句等几种类型。一般而言，理解否定句比理解肯定句需要较长的加工时间。研究发现，人对不同类型句子的理解由快到慢依次为∶真肯定句>假肯定句>假否定句>真否定句。词序。词序是表达词的语法意义的手段。汉语没有词的形态学的变化，因此，词序在句子理解中的作用明显。汉语基本词序为主一谓一宾。这种比较固定的词序提供了句子理解的线索。当词序颠倒时，人们常常会借用某些句法手段来帮助理解句子。所以，有时候，尽管原来的词序变了，人们还可以利用句法手段提供的线索正确理解句子。如，你把门打开了吗?和门是你打开的吗?词序发生了变化，但它意思是一样的。语境…	句子理解是指个体对语言输入进行解释和赋予意义的过程。它是语言处理的核心部分，涉及到语音识别、语法分析、词汇理解以及语境推理等多个层面。句子理解的过程可以分为两大部分：一是语言的解码，即将听觉或视觉的语言信息转换成抽象的概念；二是语言的解释，即根据语境和先验知识对解码出的概念赋予具体的意义。 影响句子理解的因素有很多，包括但不限于以下几点： 1. 语言能力：个体的语言能力直接影响其句子理解的效率和准确性。语言能力包括听力、阅读、口语和书写能力等。例如，一个语言能力较强的人在理解复杂句子时会更加容易。 2. 语境信息：语境信息是理解句子意义的重要因素。语境可以是物理环境，也可以是情境信息。例如，听到“把书放桌上”这个句子，如果在图书馆里，人们更容易理解这句话的具体含义。 3. 知识背景：个体的知识背景也会影响句子理解。例如，对于科学专业的人来说，他们可能更容易理解与他们专业相关的专业术语和复…	句子理解是指通过阅读或听取一句话后，能够理解其含义并加以解释。句子理解的影响因素包括语言能力、文化背景、情境理解能力、注意力集中程度等。例如，对于一个外语学习者来说，其句子理解可能受到其母语的干扰，导致理解出现偏差；而同一句话在不同的情境下可能会有不同的理解方式，这也会影响句子理解的准确性。 回答结束	a	a	a
	试从学习的认知观出发，简要比较接受学习与发现学习的利弊。	教育心理学中关于发现学习与接受学习的认知观有∶布鲁纳的认知一发现说和奥苏伯尔的有意义接受说。依据学习主体所得经验的来源不同，将学习分为接受学习和发现学习。接受学习是指在教学系统中，学生将别人的经验变成自己的经验，所学的内容是以某种定论或确定的形式，通过传授者的传授和接受者的主动构建而实现的。发现学习是在主体的活动过程中，通过对现实能动的反映及发现创造，而建构起一定的经验结构而实现的。下面分别从发现学习和接受学习的优缺点分析来比较它们之间的利与弊。发现学习的优点及缺点1.发现学习的优点∶;（1）能够最大限度地发展学生的智力和潜力;（2）激发学生的好奇心，能够使外来动机向内部动机转移，使学生对知识和学习过程本身发生兴趣;（3）学会将来做出发现的最优方法和策略;（4）有助于知识的记忆、保持与检索。2.发现学习的缺点∶（1）无视学生学习的特点，歪曲了接受学习的本意;（2）对发现学习的界定缺乏科学…	在学习的认知观中，接受学习和发现学习是两种不同的学习策略，它们各有利弊。 接受学习（Receiving Learning）通常指的是通过直接接受他人的知识和信息来学习的过程。这种学习方式在于接受和理解已有的知识体系，通常通过教师的讲授、书籍阅读、讲座等方式进行。接受学习的利弊如下： 利： 1. 效率高：接受学习可以快速获取知识，尤其是在时间紧迫或信息量巨大的情况下。 2. 结构清晰：接受学习通常基于已有的知识结构，学习者可以清楚地看到知识的框架和联系。 3. 教育资源：接受学习依赖于教育系统和专业教师，能够提供系统化的知识体系和指导。 弊： 1. 依赖性：学习者可能过于依赖教师或资料，缺乏自主探索和创新的能力。 2. 信息过载：接受学习可能导致信息过载，学习者需要筛选和整理大量的信息。 3. 不适应性：如果学习内容过时或不适应实际情况，接受学习可能导致学习效果不佳。 发现学习（Disco…	接受学习是指通过接受外部信息、知识和技能来学习，而发现学习则是指通过自主探索和实践来积累知识和技能。从学习的认知观出发，接受学习的利处在于可以通过系统化的学习方式获取结构化的知识，有助于理解和掌握基础概念和技能。例如，通过听课、阅读教材等方式进行接受学习可以快速获取大量知识。而发现学习的利处在于可以培养学习者的主动性和创造力，通过实践和探索来加深对知识的理解和运用。例如，通过实验、项目等方式进行发现学习可以激发学习者的学习兴趣和动力。 然而，接受学习可能存在的弊处是学习者可能过于依赖外部信息和教学资源，导致缺乏主动性和创造力。而发现学习的弊端在于可能需要更多的时间和精力，同时由于自主性较强，可能存在学习方向不明确或者学习效果不稳定的情况。 因此，综合来看，接受学习和发现学习各有其利弊，可以根据学习者的特点和学习目的进行选择和结合，以达到更有效的学习效果。 回答结束。	a	tie	a
	简述情绪与情感之间的区别与联系。	1）区别①情绪主要指的是感情的过程，具有较大的情境性、激动性和暂时性，往往随着情境的改变和需要的满足而减弱消失，是人类和动物都具有的。②情感主要是指那些具有稳定的、深刻的社会意义的感情，它具有显著的稳定性、深刻性和持久性，为人类所特有。（2）联系①情绪和情感都与个体的主观愿望或需要相联系。②稳定的情感是在情绪的基础上形成的，而且通过情绪来表达。③情绪也离不开情感，情感制约着情绪的外部表现，情绪的变化反映着情感的深度。	情绪和情感是心理学中常常被混淆的两个概念，但它们之间存在明显的区别和联系。 首先，情绪通常指的是一种短暂的、主观的、生理和心理反应，通常与特定的情境或刺激有关。情绪可以是积极的，如快乐、兴奋或满足，也可以是消极的，如悲伤、恐惧或愤怒。情绪反应往往是直觉性的，迅速发生，并且通常伴随着生理上的变化，如心跳加速、肌肉紧张或泪水。 情感则是更为复杂和深层次的概念，它包括对某些事物的长期态度和倾向。情感通常涉及对个人价值观、信念和关系的认知。情感可以是积极的，如爱、信任或自豪，也可以是消极的，如羞耻、嫉妒或悲观。情感往往是更为稳定和持续的，与个人的长期心理状态和行为模式紧密相关。 情绪和情感之间的联系在于，情绪可以作为情感的表达方式。例如，当一个人感到深深的爱时，他们可能会体验到温暖和快乐的情绪。相反，情绪也可以影响情感的发展和维持。例如，持续的悲伤情绪可能会导致悲观的情感。 总之，情绪是情感的表…	情绪和情感是心理学中两个相关但又不同的概念。情绪是一种短暂的、强烈的生理反应，它是针对某种刺激的内在体验，通常具有明显的生理表现，比如愤怒、恐惧、快乐等。而情感则更加广泛，是指对于某种事物或情境的主观态度和认知评价，是一种更加稳定持久的心理状态。情感通常是持久的、渐变的，而情绪则更加短暂、强烈且突发。可以说情绪是情感的一种表现形式，而情感则是更广泛、更持久的心理体验。 联系方面，情绪和情感之间存在着密切的联系。人们的情感状态会影响到他们的情绪反应，同时情绪的变化也会影响到人们对事物的情感评价。比如一个人对某个人或事物的情感态度会影响到他对该人或事物的情续情绪反应；而某种强烈的情绪体验可能会改变人们对相关事物的情感态度。因此情绪和情感之间在心理上是相互影响、相互作用的。 举例来说，一个人对待考试可能会有一种持续的焦虑情感，而在考试当天可能会出现更加明显的焦虑情绪。这种情感和情绪之间的联系可…	a	a	a
	简述成就动机的自我价值理论。	1）自我价值理论关注人们如何评估自身价值。自我价值理论的基本假设是当自我价值受到威胁时，人类将竭力维护。自我价值理论认为人类将自我接受作为最优先的追求。这种保护和防御以建立一个正面的自我形象的倾向，就是自我价值动机。（2）科温顿根据追求成功和避免失败两个维度，可以将动机倾向分为四类∶①高趋低避型∶又称作成功定向者，对学习有极高的自我卷入水平。他们的学习超越了对能力状况和失败状况的考虑。②低趋高避型∶又称作逃避失败者，他们更看重逃避失败而非期望成功。他们不一定存在学习问题或学习困难，只是对课程提不起兴趣。其背后隐藏着强烈的对失败的恐惧，感受着高度的焦虑和紧张。③高趋高避型∶又称作过度努力者，同时受到成功的诱感和失败的恐惧。对任务又爱又恨，常常处于一种冲突状态。通常是教师非常喜欢的孩子，有一种隐讳努力的现象。④低趋低避型∶又称作失败接受者，不奢望成功，对失败也不感到丝毫恐惧或者羞愧。对成就表…	成就动机的自我价值理论是由心理学家爱德华·迪克（Edward Deci）提出的。这个理论认为，人们的行为和动机受到内在动机和外在动机的影响。内在动机源自于对活动本身的兴趣和满足感，而外在动机则是由外部因素如奖励或评价所驱动。 自我价值理论认为，内在动机与自我实现和自我价值感的提升有关。当人们从内在动机中获得成就时，他们会感到自我价值的提升，这种提升会进一步增强他们对相关活动的兴趣和投入。相反，过度依赖外在动机可能会导致内在动机的减弱，因为外在奖励可能会削弱对活动本身的兴趣。 例如，一个孩子可能因为外在奖励（如糖果或玩具）而开始练习钢琴，但随着时间的推移，如果奖励停止，他们可能会失去对练习的兴趣，因为他们的内在动机（如对音乐的热爱或自我实现感）没有得到足够的培养。相反，如果孩子从一开始就因为对音乐的热爱而开始练习，他们可能会持续地对练习感兴趣，即使没有外在奖励。	自我价值理论是由心理学家卡尔·罗松在20世纪70年代提出的，主要强调人们追求成就的动机是为了实现自我价值的肯定。根据这一理论，个体会通过与他人比较来评价自己的表现，从而获得自我肯定和满足感。当个体在一项任务中取得成功时，他们会感到自己的能力和价值得到了认可，从而激发他们继续追求更高的成就。 举例来说，一个学生在考试中取得好成绩后，会感到自己的学习能力和智力受到了认可，从而更有动力去学习和取得更好的成绩。同样地，一个职场人士在工作中得到了表扬和晋升，也会感到自己的能力和价值被认可，从而更有动力去追求更高的职业成就。 总的来说，自我价值理论认为成就动机源于个体对自己的能力和价值的追求，通过取得成功来获得自我肯定和满足感，从而激发自己不断追求更高成就的动力。 回答结束.	a	tie	a
	简述效度的种类及估计方法。	效度是一个测验或量表实际能测出其所要测的心理特质的程度。在测量理论中，效度为与测量目的有关的真实变异数与总变异输的比率。效度的主要类型及估计方法有∶（1）内容效度∶一个测验实际测到的内容与所要测量的内容之间的吻合程度，估计方法包括逻辑分析法、复本法、再测法和经验法。（2）结构效度∶一个测验实际测到所要测量的理论结构或特质的程度，估计方法包括测验内部寻找证据法、测验之间寻找证据法、实证效度法、多质-多法法和因素分析法。（3）实证效度∶一个测验对处于特定情境中的个体的行为进行估计的有效性，估计方法包括相关法、区分法、命中率法、灵敏度和确认度。	效度是指测量工具（如问卷、测试等）能够准确地测量它所要测量的特定心理或行为特征的程度。效度可以分为两个主要的类型：面向效度和构念效度。 1. 面向效度（Face Validity）：这是一种最直接的效度类型，它基于测量工具看起来是否与它所要测量的内容相关。换句话说，面向效度关注的是测量工具的外观和内容是否合理，是否能够让人们认为它在测量它声称要测量的东西。例如，如果一个问卷用于评估一个人对工作的满意度，那么这个问卷中包含了与工作相关的内容和问题，人们就可以认为这个问卷具有面向效度。 2. 构念效度（Construct Validity）：这是一种更为深入的效度类型，它关注的是测量工具是否能够准确地测量一个抽象的心理或行为构念。构念效度包括了两个子类型：关系效度（Convergent Validity）和区分效度（Discriminant Validity）。 - 关系效度：这指的是测量工…	效度是指一个测量工具或者方法是否测量了它所声称要测量的内容。效度可以分为内部效度和外部效度两种。 内部效度包括内容效度、构造效度和准则效度。内容效度是指测量工具能够全面反映所要测量的内容，通常通过专家评议或者比较不同测量工具来进行评估。构造效度是指测量工具是否能够准确地反映出所要测量的概念结构，通常通过因素分析等方法来进行评估。准则效度是指测量工具与已有标准或者行为的相关性，通常通过与其他测量工具或者行为进行比较来进行评估。 外部效度包括预测效度和内容效度。预测效度是指测量工具能够准确地预测未来的行为或者结果，通常通过长期追踪研究或者实证研究来进行评估。内容效度是指测量工具是否能够泛化到其他相关领域或者群体，通常通过不同样本的研究来进行评估。 估计效度的方法包括相关性分析、因素分析、回归分析、实证研究等。通过这些方法可以评估测量工具的内部效度和外部效度，从而确定其测量的有效性和可靠性。 …	b	b	b
	仁者见仁、智者见智体现了知觉的什么特性?这一特性在知觉中的作用有哪些?	知觉是客观事物直接作用于感官而在头脑中产生的对事物整体的认识。题干中的仁者见仁、智者见智体现了知觉的理解性。知觉的理解性是指人们在知觉过程中，并不是被动地认识知觉对象的特点，而是以过去的知识经验为依据，力求对知觉对象作出某种解释，使它具有一定的意义。由于每个人的知识经验会有一定的差异，故不同的人在看到同一个事物时会出现差异性的解释，即仁者见仁、智者见智的现象。除此之外，知觉还有选择性、整体性和恒常性。知觉的理解性对知觉的选择性有一定的帮助作用，可以帮助对象从背景中分出。如我们对两歧图形的知觉。另外，知觉的理解性也有助于知觉的整体性，即人们对自己理解和熟悉的东西，容易当成一个整体来感知，相反，知觉的整体性便会受到破坏。	回答： 仁者见仁、智者见智体现了知觉的主观性和相对性特性。知觉的主观性指的是个体的知觉过程受到其个人经验、文化背景、情感状态等因素的影响，导致同一刺激物可能被不同的人知觉得出不同的结果。知觉的相对性则意味着知觉的结果并不是绝对的，而是与观察者的认知框架和认知偏差有关。 这一特性在知觉中的作用主要体现在以下几个方面： 1. **认知多样性**：主观性和相对性使得人类的认知世界变得丰富多样，每个人都可以根据自己的经验和理解来解读和解释周围的世界。 2. **适应性**：个体的主观知觉可以帮助他们更好地适应环境。例如，一个经验丰富的猎人可能会因为长期的训练和经验而对自然环境有更深刻的理解和感知。 3. **创造性**：相对性为艺术创作、科学发现等提供了可能性。不同的人可能会从同一事物中发现不同的特征和意义，这种多样性是创新和进步的源泉。 4. **沟通障碍**：主观性和相对性也可能导致沟通上的…	回答: "仁者见仁、智者见智"体现了知觉的主观性特性。不同的人在面对同一种情境或事物时，会因为个人的经验、价值观、情绪等因素而产生不同的感知和理解。这种主观性特性在知觉中起着至关重要的作用，因为它使得人类能够根据自身的需求、目标和情感来选择性地关注和处理信息，从而更好地适应环境和做出决策。例如，在一场表演中，不同的观众可能会因为自己的喜好和经验而对演员的表现有不同的评价，这反映了知觉的主观性特性。 回答结束"	tie	tie	tie
	新冠肺炎爆发后，有人心慌，睡不好觉;有人容易盲从，听信谣言;有人疯狂抢购某些商品，出门后戴多层口罩，回家后不断洗手，请用应激的相关知识分析这些现象。	应激是指人对某种意外的环境刺激所做出的适应性反应。应激状态的产生与人面临的情景及人对自己 能力的估计有关。当情景对一个人提出了要求，而他意识到自己无力应付当前情境的过高要求时，就会体验到紧张而处于应激状态。人在应激状态下，会引起机体的一系列生物性反应，如肌肉紧张、血压、心率、呼吸以及腺体活动都会出现明显的变化。塞里把这种变化称为适应性综合征，并指出这种综合征包括动员、阻抗和衰竭三个阶段。动员阶段是指有机体在受到外界紧张刺激时，会通过自身的生理机能的变化和调节来进行适应性的防御。阻抗阶段是通过心率和呼吸加快、血压升高、血糖增加等变化，充分动员人体的潜能，以对付环境的突变。衰竭阶段是指引起紧张的刺激继续存在，阻抗持续下去，此时必需的适应能力已经用尽，机体会被其自身的防御力量所损害，结果导致适应性疾病。新冠肺炎是一种突发公共卫生事件，且持续时间较久，截止目前，还暂时没有有效的防治策略，这对人们…	新冠肺炎疫情的爆发引发了全球范围内的应激反应，这些反应体现在人们的心理和行为上。应激是指在面对威胁或压力时，身体和心理的反应。根据应激反应理论，人们在面对威胁时会经历“战斗或逃跑”反应，这包括了“战斗”（攻击或防御）和“逃跑”（逃避或逃脱）的两种基本反应。 1. 心慌，睡不好觉：这可能是由于应激反应导致的焦虑和恐惧。人们在面对不确定性和威胁时，身体会释放激素如肾上腺素和皮质醇，这些激素会导致心跳加快、睡眠障碍等症状。例如，人们担心自己或家人可能感染新冠病毒，导致无法安心入睡。 2. 易于盲从，听信谣言：在应激的情况下，人们可能会寻求简单的解释来减少不确定性。盲从和听信谣言可能是因为人们在寻求安全感和控制感。在这种情况下，人们可能会更容易接受那些提供快速解决方案或简单解释的信息，即使这些信息没有经过科学验证。 3. 疯狂抢购某些商品：这种行为可能是由于恐慌购物的结果。恐慌购物是应激反应的一…	这些现象可以在一定程度上被解释为人们在面对新冠肺炎这种突发事件时的应激反应。根据研究，人们在面对威胁时常常会出现心理上的不安和恐惧，导致情绪波动和睡眠问题。睡眠不好可能是因为人们对未知情况的担忧和焦虑，导致思绪无法平静下来。盲从和听信谣言可能是因为人们在恐慌情绪下寻求安全感和控制感，而一些谣言往往会提供简单直接的解决方案，使人们感到安心。而抢购商品和过度防护可能是为了减轻焦虑情绪和增加控制感，通过采取行动来应对恐慌。 另外，人们在应对危机时往往会出现“信息过载”的情况，由于信息源的碎片化和不确定性，人们很难准确判断信息的真实性，从而容易受到虚假信息的影响。 总的来说，这些行为都可以被视为人们在应对突发事件时的正常心理反应，而了解这些心理机制可以帮助我们更好地理解并应对自己的情绪和行为。 回答结束.	tie	tie	tie
	简述斯金纳与班杜拉的强化观的区别。	1）斯金纳提出了操作性条件作用说，强调行为的塑造是建立行为及其结果之间的联结（R-S）。斯金纳提出了强化的概念，指提升行为再现的频率，可以通过在行为结束之后给予积极反馈（正强化）和撤销消极反馈（负强化）完成，而行为建立的关键是及时强化。（2）班杜拉提出了社会学习理论，认为个体通过观察他人的行为及结果就可以获得行为模式。社会学习理论区分获得和表现，认为强化不是直接增加行为出现频率，而是提供了信息与诱因。除直接强化外，班杜拉还提出了替代性强化和自我强化，强调了认知和社会性在强化过程中的作用。总之，斯金纳的行为主义，对于强化的解释非常机械化，忽视了内部机制与过程，而班杜拉强调了认知因素的参与，解释了强化起作用的原因;斯金纳强调参与型学习与直接强化，而班杜拉更加强调替代强化与自我强化的作用。	斯金纳（B.F. Skinner）和班杜拉（Albert Bandura）都是著名的心理学家，他们在行为主义心理学领域都有重要贡献，但他们对强化的理解和应用有所不同。 斯金纳的强化观点主要基于操作条件反射（Operant Conditioning），他认为行为是通过其后果被强化或惩罚的。斯金纳的实验室设备，如操作条件反射箱（Operant Conditioning Chamber），允许他观察动物（通常是小鼠）在获得食物奖励或避免电击惩罚的行为。斯金纳的强化理论包括正强化（增加行为的概率，如通过奖励），负强化（减少行为的概率，如通过惩罚），以及延迟强化（奖励或惩罚与行为之间有时间间隔）。斯金纳的理论强调环境因素在塑造行为上的作用，并且认为强化是学习和行为改变的关键因素。 班杜拉的社会学习理论（Social Learning Theory）则更侧重于观察和模仿的作用。他认为学习不仅仅是通过…	斯金纳和班杜拉都是行为主义心理学家，他们都认为行为是可被学习和改变的。然而，他们在强化观上存在一些区别。斯金纳认为强化是一种对行为的积极刺激，通过增加这些积极刺激来增强或巩固某种行为。他提出了正强化和负强化的概念，即通过增加或减少惩罚来影响行为。而班杜拉则更加强调内在的心理过程，他认为行为是由外部刺激和内在心理状态共同决定的。班杜拉认为行为发生时，个体会根据自己的认知和情感对强化做出反应。 举例来说，当一个学生在课堂上回答问题正确时，老师给予称赞和奖励，这就是斯金纳所强调的正强化。而相比之下，班杜拉可能会认为学生回答正确的背后可能还有其他内在因素，比如对知识的渴望或者对老师的尊重，这些因素会影响学生对强化的反应。 回答结束。	a	a	a
	简述心理研究中衡量因变量指标的标准，并举例说	1）有效性，指标充分代表当时的现象或过程的程度。如;减肥效果的因变量指标是体重而非身高。（2）客观性，指标客观存在，通过一定的方法观察到。如∶小孩子攻击性的因变量指标是攻击性行为次数的多少。（3）数量化，指标能够数量化，便于记录与统计。如∶小白鼠饥饿程度的因变量指标用小白鼠的进食量和进食速度来衡量。（4）信度，指标应该保证多次测量结果的稳定性。如∶智力分数的因变量指标用韦氏智力测验的分数。（5）敏感性，指的是因变量要对自变量的变化敏感，即量程限制，其表现为由于反应指标的量程不够大，而造成反应停留在指标量表的最顶端（天花板效应）或最低端（地板效应），从而使指标的有效性遭受损失的现象。如∶是否解决问题的这个因变量的指标改为解决问题的正确率。	在心理研究中，衡量因变量指标的标准通常包括可靠性（reliability）和有效性（validity）。可靠性指的是测量工具在不同时间或不同评估者之间的稳定性和一致性，而有效性则指的是测量工具是否真正测量了它所声称要测量的内容。 可靠性通常通过内部一致性（internal consistency）和稳定性（test-retest reliability）来衡量。内部一致性衡量的是测量工具的不同部分是否相互一致，而稳定性则衡量的是在不同时间进行相同测量时的结果是否一致。例如，一个常用的内部一致性衡量工具是克里斯托弗斯森的α（Cronbach's α），它可以用来评估一个量表或测试的内部一致性。 有效性则分为面向内容的有效性（content validity）、面向预测的有效性（predictive validity）、面向构造的有效性（construct validity）和面向回应的有效…	因变量是心理研究中需要研究的变量，它通常是研究者希望了解或者预测的变量。衡量因变量的指标有很多种，常见的包括自我报告问卷、行为观察、生理数据等。 举个例子，如果我们想研究一个心理疾病患者的焦虑水平，我们可以使用一些标准的心理问卷来衡量他们的焦虑水平，比如汉密尔顿焦虑量表。另外，我们也可以通过观察他们的行为来判断他们是否表现出焦虑情绪，比如是否频繁摆动腿、手部的抖动等。同时，我们还可以采集他们的生理数据，比如心率、皮肤电反应等来衡量他们的生理反应。 通过多种指标的综合使用，我们可以更全面地了解因变量，从而进行更准确的心理研究。 回答结束	a	a	a
	什么是短时记忆？影响短时记忆编码的因素有哪些	（1）短时记忆∶指信息一次呈现后，在大脑中保持一分钟左右的记忆。其特点是保存信息时间短暂，保存信息的容量有限。作为三级记忆系统的中间阶段，短时记忆是信息从感觉记忆到长时记忆之间的一个过渡阶段。其功能是暂时地存储信息，以使信息进入长时记忆。短时记忆编码的方式为视觉编码和听觉编码。（2）短时记忆编码的效果受到如下因素的影响∶①个体的觉醒状态。觉醒状态即大脑皮层的兴奋水平，它直接影响到记忆编码的效果。例如，艾宾浩斯通过实验发现，被试者在上午十一二点之间的学习效率最高，下午六点至八点之间效率最低。这可能与不同时间的不同觉醒状态有关。②材料的加工深度。认知加工深度是影响短时记忆编码的重要因素，语义加工效果要好。③组块。短时记忆的突出特点是容量有限，容量为7±2个组块。对记忆的内容组块化或者扩大每一个组块包含的信息量可以提高记忆的编码效果。④材料的数量和质量。材料数量越多，对材料的编码效果越差。越具…	短时记忆是指能够在没有外部记忆援助的情况下维持一段时间的信息存储。它通常被认为是由大脑的工作记忆系统负责管理，特别是由颞叶的颞叶皮层和前额叶皮层的工作记忆网络共同参与。短时记忆的容量有限，大约可以存储7±2个信息单元，这个概念被称为“魔术数字七”。 影响短时记忆编码的因素有很多，包括但不限于： 1. **信息的相关性**：相关信息更容易被编码到短时记忆中。例如，如果你在听一个讲座，讲座中的信息如果与你之前的知识或经验相关联，你会更容易记住这些信息。 2. **信息的重要性**：人们更容易记住那些对他们有重要意义的信息。例如，紧急情况下的信息往往会被更好地记住，因为它们对生存或安全至关重要。 3. **信息的可视化程度**：能够形成图像或视觉化的信息更容易被记住。例如，记忆一个故事比记忆一串数字通常更容易，因为故事可以通过情节和角色来可视化。 4. **个体差异**：不同的人在短时记忆方面…	回答: 短时记忆是指信息仅在短暂时间内被暂存并保持的记忆系统，通常持续时间为数秒至数分钟。影响短时记忆编码的因素包括注意力、意义性、情感因素、重复次数等。例如，如果一个信息被注意到并且具有一定的意义性，那么它更容易被编码到短时记忆中。此外，重复次数越多，信息被编码到短时记忆中的机会也越高。因此，这些因素都会影响一个信息是否能够被有效地记忆和保持在短时记忆中。 回答结束	a	a	b
	简述弗洛伊德的无意识理论及对梦的解释	1）弗洛伊德的无意识理论∶无意识是弗洛伊德学说的一个基本概念。弗洛伊德把人的意识分为意识、无意识和前意识三个层面。意识是对自己身心状态及事物的觉知状态，处于表层，是一个人可以直接感受到的东西。无意识是个体不能觉察到的心理活动，处于大脑底层，是一种本能，个人无法意识并影响自己的行为。前意识是介于意识和无意识之间的过渡层面，处于中层。在三者之中，弗洛伊德特别强调无意识的作用，并且把它与意识的作用对立起来。认为人类的一切个体和社会的行为都根源于心灵深处的某种欲望或动机，特别是性欲的冲动。欲望以无意识的形式支配人，并且表现在人的正常和异常的行动中。（2）弗洛伊德无意识理论对梦的解释∶梦是无意识中被压抑的欲望得到满足的重要途径之一，即梦是愿望的30G。达成。梦的解释需要从显性梦境回溯到隐性梦境，梦中的符号和隐喻既有特殊性，又有普遍性。梦是潜意识过程的显现，是通向潜意识最可靠的途径。（3）冰山理论∶…	弗洛伊德的无意识理论是他心理分析学说的核心之一。根据弗洛伊德，人类行为和情感受到无意识心理过程的强烈影响。无意识是指那些不被个体意识到或无法控制的思想、感受和冲动。弗洛伊德认为，无意识是由压抑（repression）和其他防御机制所形成的，它们是为了保护个体免受过往经历带来的痛苦和冲突。 弗洛伊德认为梦是无意识心理过程与意识心理过程之间的交流方式。梦是无意识冲突的表现形式，通过梦境，弗洛伊德试图揭示个体的无意识动机和冲突。弗洛伊德将梦分为两部分：梦的内容（manifest content）和梦的意义（latent content）。梦的内容是我们在醒来时所记得的，而梦的意义是无意识冲突的象征性表达。 弗洛伊德在解释梦的过程中，提出了梦的解析（dream analysis）技术。通过分析梦境中的象征和隐喻，心理分析师可以揭示个体的无意识动机和潜在的冲突。例如，如果一个人梦到被追逐，这可能象…	弗洛伊德认为无意识是人类心灵深处的一部分，包含我们不易察觉的欲望、冲突和记忆。他认为，无意识中存在着我们的本能和压抑的欲望，这些欲望受到了社会和道德规范的约束，因此被压抑在潜意识中。梦是无意识的一种表现形式，通过梦境，我们可以窥视到无意识中那些被压抑的欲望和冲突。弗洛伊德解释梦境时，提出了梦的两种含义：表面含义和潜在含义。表面含义是梦中的明显内容，而潜在含义则是隐藏在表面之下的无意识冲突和欲望的象征性表达。通过分析梦境，可以揭示个体内心深处的欲望和冲突，帮助人们更好地理解自己的内心世界。 回答结束	tie	tie	tie
	简述学习迁移的形式训练说及其对教育的影响。	1）形式训练说∶是一种早期的学习迁移理论。主张迁移要经过一个"形式训练"的过程才能产生。认为通过一定的训练，可以使各种官能得到发展，从而转移到其他学习上去。以官能心理学为基础，官能心理学认为人的心理是由许多不同的官能组成的。官能就是注意、知觉、记忆、思维、想象等。形式训练说认为，迁移是无条件的，自动发生的，对官能的训练就如同对肌肉的训练一样。记忆的官能通过记忆的训练而得到增强，推理和想象的官能则通过推理和想象的训练得以增强。训练和改进各种心理官能是教学的重要目标，教育的任务就是改善学生的各种官能，而改善以后的官能就能自动的迁移到其他的学习中。（2）对教育的影响∶从形式训练说的角度看，心理是由各种成分组成的整体，一种成分的改进会增加其他的各种官能，迁移就是各种官能得到训练而发展的结果。按照形式训练说的观点，传递知识没有训练官能重要，知识的价值仅在于训练官能的材料。学校选择的材料不必重视其使…	学习迁移的形式训练说是一种教育理论，它强调学习过程中的知识和技能在不同情境之间的转移和应用。这种理论认为，学习不仅仅是为了掌握某一具体技能或知识点，而是为了培养能够在多种情况下应用这些技能和知识的能力。 形式训练说认为，通过系统的训练和实践，可以帮助学生建立起一种通用的认知策略，这些策略可以在不同的学习任务和情境中被有效地应用。这种策略的建立有助于学生在面对新挑战时能够快速适应和学习。 形式训练对教育的影响是显著的。首先，它强调了教学方法的重要性，鼓励教师采用能够促进学生建立通用认知策略的教学方法。例如，通过案例分析、模拟实验和批判性思维训练等活动，学生可以学习如何在不同的情境下应用所学知识。 其次，形式训练说促进了学生的自主学习能力。通过培养学生的自我监控、自我评估和自我调整能力，学生能够在未来的学习中更加自信和有效地应用所学知识。 最后，形式训练说还强调了跨学科学习的重要性。通过将不…	学习迁移是指一个在学习某个任务或领域中所获得的知识、技能或策略是否能够被成功地应用到其他任务或领域中的能力。形式训练是指在学习过程中，通过系统化、结构化的教学方法来帮助学生掌握某种知识或技能。形式训练可以提高学生的学习效果，帮助他们更好地掌握知识和技能，从而促进学习迁移的发生。 形式训练对教育的影响主要体现在以下几个方面： 1. 帮助学生建立知识框架和技能体系：形式训练能够帮助学生系统地学习知识和技能，建立起完整的知识框架和技能体系，从而为学习迁移奠定基础。 2. 提高学生的认知能力和问题解决能力：形式训练能够培养学生的思维能力、分析能力和解决问题的能力，使他们能够更好地应对各种学习和生活中的挑战。 3. 促进学生的终身学习能力：通过形式训练，学生可以掌握一定的学习方法和技巧，培养自主学习的能力，从而使他们具备终身学习的意识和能力，不断提升自己的知识水平和技能。 总的来说，形式训练对教育…	a	tie	a
	解释受测者的心理测验分数时应注意哪些问题？	测验分数的解释涉及两个问题∶第一，如何看待测验分数的意义;第二，如何将测验分数的意义告知给受测者。在解释测验分数意义时，应注意∶（1）主试应充分了解测验分数的性质和功能，具备心理测验的基本知识与概念，并对具体使用的测验非常熟悉。（2）慎重对待测验结果原因的解释，谨防片面极端，考虑被试个人状况、经济、背景及其测验情境等。（3）必须充分估计测验的常模和效度的局限性，一定要依据从最相近的团体、最相匹配的情境中获得资料。（4）解释分数应参考其他相关资料，参考被试的教育经验、文化背景、面谈内容、习惯、态度、兴趣等。（5）应将测验分数视为"一段分数"或范围，而不应视为一个特定的数值来解释。（6）不能比较来自不同测验的分数，如需加以比较，必须将二者放在统一的尺度上。当两种测验取样于相同范围时，人们常用等值百分位法将两种测验等值化。	在解释受测者的心理测验分数时，应注意以下几个问题： 1. **测验的有效性和可靠性**：首先，需要确认该测验在心理学领域内的有效性和可靠性。一个有效的测验能够准确地测量它所要测量的心理特征，而可靠性则指测验结果的稳定性，即不同时间下测验结果的一致性。 2. **标准化操作**：确保测验是在标准化的条件下进行的，包括受测者在同一环境下进行测验，时间限制是否一致等。标准化操作有助于减少外部因素对测验结果的影响。 3. **受测者的理解和配合**：了解受测者在测验过程中的理解和配合情况。例如，是否有语言障碍影响理解测验内容，或者是否有其他外部干扰。 4. **文化适应性**：考虑测验的文化适应性。不同的文化背景可能会影响个体的回答方式和理解测验内容的方式。 5. **个体差异**：每个人的心理特征和能力都是独一无二的，因此在解释分数时，应考虑个体差异。例如，某些测验可能更适合某些特定群体，而不…	回答: 在解释受测者的心理测验分数时，应该注意以下问题： 1. 测验的可信度和效度：首先要确保所使用的心理测验具有良好的可信度和效度，即测验能够稳定地测量受测者的心理特征，并且确实反映受测者的真实状态。 2. 受测者的背景信息：了解受测者的背景信息，包括年龄、性别、教育水平、文化背景等，以便更准确地解释测验结果。 3. 测验结果的解释方式：在解释测验结果时，需要注意避免将结果简单地归因于受测者的个人特质，而应该考虑到外部因素对测验结果的影响。例如，某些心理测验可能受到情绪状态、测试环境等因素的影响，需要在解释结果时加以考虑。 4. 与其他测验结果的比较：如果可能的话，可以将受测者的心理测验结果与其他相关测验结果进行比较，以获取更全面的了解。例如，将人格测验的结果与情绪测验的结果结合起来，可以更好地了解受测者的心理特征。 5. 尊重受测者的隐私和权利：在解释测验结果时，要尊重受测者的隐私和…	b	b	b
	简述注意的认知资源理论。	认知资源理论把注意看做是一组对刺激进行归类和识别的认知资源或认知能力。注意是一种认知资源，它是有限的。人进行不同的活动时，需要不同的注意资源。当认知资源完全被占用时，新的刺激将得不到加工(未被注意)。该理论还假设，输入刺激本身并不能自动地占用资源，而是在认知系统内有一个机制负责资源的分配。这一机制是灵活的，可以受人们的控制，这样人们就可以把认知资源分配到重要的刺激上。	注意的认知资源理论（Attentional Resources Theory）是心理学中的一种理论，主要由Donald Broadbent和Alan Baddeley等研究者提出的。该理论认为，人类在处理信息时，存在一定的认知资源限制。这些资源可以被视为一种有限的心理能量，用于处理和分析信息。 根据这一理论，注意力是有限的，人们在任何给定时间内只能专注于有限数量的信息或任务。例如，当你在做一项复杂的工作时，你可能会专注于工作的关键部分，而忽略周围的噪音或其他干扰。这是因为你的认知资源被工作的处理所占用，无法同时处理其他信息。 此外，认知资源理论还提出了“瓶颈”概念，即信息输入和处理能力之间的差距会导致信息处理效率下降。例如，如果你在开车时接听电话，你可能会发现自己难以同时处理两项任务，因为你的认知资源被开车这项任务所占用，无法同时处理电话对话。 总的来说，注意的认知资源理论强调了注意力在…	注意的认知资源理论是指人类的认知资源有限，需要在多个认知任务之间分配。根据这一理论，当一个人在执行某项认知任务时，他的认知资源会被占用，导致其他任务的执行效率降低。这就是为什么我们在进行复杂任务时会忽略一些周围的信息，或者在多任务情况下会感到困难。 举例来说，当一个人在开车的时候，他的认知资源主要集中在驾驶这个任务上，可能会忽略掉路边的广告牌或者行人，因为他的认知资源已经被驾驶任务占用了。 因此，根据注意的认知资源理论，我们在进行任务时需要合理分配注意力，避免在同一时间同时进行多个复杂任务，以免影响认知效率。 回答结束.	a	a	a
	简述解释助人行为的三种主要理论。	社会交换理论社会交换理论强调人与人之间的相互作用，本质上是个人试图尽可能获得最大利益，同时又尽可能少地付出代价的社会交换过程。也就是说，社会交换理论认为助人行为是为了获得回报，避免惩罚。社会规范理论社会规范理论认为社会规范规定了人们的助人行为。社会中存在互惠规范和社会责任规范这两种最为普遍的规范。互惠规范是社会期望每个人去帮助对自己有善意的人。社会责任规范是指社会期待人们去帮助需要帮助的人。进化心理学进化心理学认为，生命的本质就是使基因存活下来。我们的基因驱使我们采用某些能使其存活机会最大的方式。该理论解释了我们为什么更愿意帮助与我们有亲缘关系的人，特别是为什么父母甘愿为孩子做奉献。	解释助人行为的三种主要理论是： 1. **交换理论（Exchange Theory）**：这种理论认为人们帮助他人是出于自我利益的。帮助他人可以带来正面的社会回报，如感激、友谊或社会地位的提高。例如，一个员工可能会帮助同事完成工作，以获得同事的感激和好感，从而增强工作关系。 2. **社会学习理论（Social Learning Theory）**：根据这一理论，人们通过观察他人的行为和结果来学习帮助他人的行为。人们可能会模仿那些在帮助他人时获得正面结果的个体。例如，一个孩子可能会看到父母或其他成年人帮助需要帮助的人，并模仿这种行为。 3. **同理心理论（Empathy-Altruism Hypothesis）**：这种理论认为，人们帮助他人是因为他们能够理解和感受他人的痛苦或困难，并因此产生内在的愿望去帮助。这种帮助是出于对他人的真诚关心，而不是为了获得回报。例如，一个看到有人受伤并…	1. 互惠理论：根据互惠理论，人们有一种内在的动机，即希望在帮助他人时获得回报。这种回报可以是直接的，比如别人也帮助自己，或者间接的，比如获得社会认可或者内心的满足感。斯坦利·米尔格拉姆的"六度分隔理论"研究表明，人们之间其实是通过互惠关系相连的。 2. 社会认知理论：社会认知理论认为，人们的行为会受到他们对周围环境的认知和解释的影响。当人们看到别人需要帮助时，他们会根据自己对这种情况的理解和评价来决定是否伸出援手。比如，如果一个人相信他人的困境是真实的并且可以通过自己的帮助得到解决，那么他可能会更倾向于帮助。 3. 社会责任理论：社会责任理论认为，人们有一种道德和伦理上的责任感，需要帮助那些处于困境中的人。这种责任感可能源自个人的价值观、宗教信仰或者道德准则。斯坦利·米尔格拉姆的"权威命令实验"中也表明，人们在受到权威的指示时，会更倾向于遵守道德和社会责任。 回答结束	b	b	b
	简述维果茨基的心理发展观。	维果茨基是社会文化历史学派的创始人，他关于心理发展的主要观点有:高级心理机能的发生:社会起源说维果茨基将心理机能划分为低级心理机能和高级心理机能。自然的直接的低级心理机能是指感觉、知觉、不随意注意、形象记忆、冲动性意志、直观的动作思维等。低级心理机能是消极适应自然的心理形式。社会的、间接的高级心理机能是指随意注意、逻辑记忆、抽象思维、高级情感和意志等。这些高级心理机能具有一系列根本不同于低级心理机能的共同特征:这些机能是随意的、主动的，是由主体按照预定的目的而自觉引起的:就它们的反映水平而言，是概括的、抽象的，也就是说在各种机能中由于有思维的参与从而使它们发生了本质的变化;就其实现过程的结构而言，是社会历史发展的产物，是受社会规律所制约的;从个体发展看，高级心理机能是在人际的交往、活动过程中产生并不断发展起来的。高级心理机能发展的机制:符号工具中介说维果茨基认为，人类有两种工具:物质工具…	回答开始： 列夫·维果茨基（Lev Vygotsky）是一位俄罗斯心理学家，他的理论对教育学和心理学产生了深远的影响。维果茨基的心理发展观主要围绕着社会文化环境在儿童认知发展中的作用展开。 维果茨基认为，儿童的认知发展是通过与他人的社会互动来实现的。这种互动不仅仅是简单的信息传递，而是通过语言和文化传统来塑造认知过程。儿童通过与更有经验的他人（如父母、老师或同龄人）的交流和合作，逐渐学会如何解决问题和理解世界。 他提出了“社会文化发展理论”，其中核心概念之一是“潜在发展”和“现实发展”。潜在发展指的是儿童在成人指导下能够达到的发展水平，而现实发展则是儿童在没有成人帮助的情况下能够达到的水平。维果茨基认为，潜在发展和现实发展之间的差距是儿童发展的动力，促使儿童不断学习和成长。 此外，维果茨基还提出了“社会互动理论”，认为儿童的认知发展是通过与他人的社会互动来实现的。这种互动包括语言交流、合…	维果茨基的心理发展观是建立在社会文化学习理论的基础上的。他认为，儿童的心理发展是在社会文化环境中完成的，而不是孤立地进行。维果茨基提出了“区间发展阶段”这一概念，认为在这个阶段，儿童通过与更有经验的人合作和互动，逐渐掌握和内化了文化中的知识和技能。他强调了社会互动和文化传统对儿童发展的重要性，认为发展是一种社会建构的过程。 维果茨基的心理发展观对教育实践产生了深远的影响。他提出了“近似发展区”这一概念，强调了教学应该根据学生的发展水平来进行，帮助他们逐步提升能力。这也促使了教育者们更加重视学生个体差异和发展特点，提倡个性化教学。 举例来说，维果茨基的“区间发展阶段”可以解释为一个孩子在学习一个新技能时，需要教师或者家长的指导和支持，通过互动和合作，孩子才能逐渐掌握这个技能并内化为自己的能力。 回答结束	tie	tie	tie
	简要说明在技能形成过程中有哪些共同规律?	在技能的练习进程可能不完全一样，但它们之间又有某些共同的规律和特点，只有一般的发展趋势。练习成绩变化趋势。在多数情况下，练习开始时成绩的提高较快、较明显，以后技能的进步逐渐缓慢下来。造成这种现象的原因有练习开始时，人们受新鲜感和好奇心等强烈动机的驱使，兴趣高，干劲大，因而进步快，以后人们对要学习的技能失去新鲜感，热情下降，进步也就缓慢了。②)练习开始时，人们可以利用生活中已经学会的技能来解决问题，由于新、旧技能之间有许多共同的成分或因素，因而学习新技能易取得明显的成绩，以后，新技能与旧技能的差别越来越大，人们仪仅依靠旧的技能已无法满足新技能的要求，这时候，继续提高成绩就比较困难了。③在练习的初期，人们的努力集中在掌握个别的动作因而提高较快，以后，人们把注意转向动作的协调、转换，因而进步就不明显了。高原现象。练习成绩的进步并非直线式的上升，有时会出现暂时停顿的现象，叫“高原现象”。高原现象…	在技能形成过程中，存在一些共同的规律，这些规律对于理解和促进技能的学习和发展至关重要。以下是一些主要的规律： 1. **练习与反馈的重要性**：重复练习是技能形成的关键因素。通过不断的练习，人们能够逐渐掌握技能的各个方面。同时，有效的反馈对于提高技能至关重要。反馈可以帮助学习者识别错误并纠正它们，从而加速技能的提升。 2. **分解复杂技能**：复杂技能通常需要被分解为更小、更易于管理的部分。这种分解有助于学习者逐步掌握技能的各个组成部分，并最终将它们组合起来。 3. **过渡期的存在**：在技能形成过程中，学习者经常会经历一个过渡期，这是指在旧技能和新技能之间的不稳定状态。在这个阶段，学习者可能会表现出不稳定或不一致的行为，但这通常是技能发展的正常部分。 4. **自我监控和自我调节**：随着技能的发展，学习者需要学会自我监控他们的表现，并根据需要进行自我调节。这包括识别需要改进的地方…	在技能形成过程中，有一些共同的规律，其中包括以下几点： 1. 学习曲线：学习一个新技能时，通常会经历一个学习曲线，最初学习速度较快，然后逐渐变缓，最后达到一个稳定水平。这是因为在刚开始学习时，学习者需要适应新的知识和技能，而后期则是在不断细化和巩固已掌握的技能。 2. 刻意练习：要想在某个领域获得高水平的技能，关键在于进行刻意练习。刻意练习是指有目的、有计划地进行练习，不断挑战自己的能力极限，以此来促进技能的提升。 3. 反馈与调整：在技能形成过程中，及时的反馈对于学习者来说至关重要。学习者通过不断接收反馈信息，可以及时调整自己的学习方法和技能应用，从而更好地提升自己的技能水平。 4. 潜意识加工：研究表明，一些技能的学习和提升过程并不完全依赖于意识层面的努力，潜意识的加工也起到了重要作用。因此，有时候学习者需要给予自己一定的休息和放松时间，让大脑在潜意识中进行信息的整合和加工。 总的来…	a	a	a
	简述托马斯和切斯提出的各种婴儿气质类型的特点及其对儿童抚养的启示意义，	托马斯和切斯提出的各种婴儿气质类型的特点托马斯和切斯提出儿童的气质可以从9个方面进行评价，包括活动水平、节律性、注意的转移、趋近与退缩、注意的广度和坚持性、适应性、反应强度、反应闯限、心境质量等。。在此基础上他们聚类分析出3种气质类型的儿童:“容易型”(easy)，大约占 40%。这些婴儿性情温和，有满足感，快乐，对新的经验(比如接触陌生人)非常开放并具有适应性。他们大体上表现出积极的倾问，有好奇心。他们有定时吃东西和睡眠的习惯他们也能够忍受挫折和不适。“困难型”(diffcult)，大约占 10%。这些婴儿活跃，易怒，习惯没有规律。他们常常对生活常规的变化做出消极反应，对新的人和环境的适应较慢，并倾向于退缩。他们经常大声哭啼，遇到挫折时常常发脾气。“慢热型”(slow-to - wamm-up)，大约占 15%。这些婴儿相对不太活跃，有点闷闷不乐每天的生活有一点规律。他们像困难型的婴儿…	托马斯和切斯提出的婴儿气质类型主要包括以下四种：易激惹性、神经质、情绪性和适应性。这些气质类型是根据婴儿在不同情境下的反应来区分的，并且通常认为这些气质特征在婴儿出生时就已经存在，并且在儿童成长过程中保持相对稳定。 1. 易激惹性：易激惹的婴儿在受到刺激时反应迅速且强烈。他们可能会在轻微的触碰或声音中表现出不满。对于抚养者来说，理解易激惹的婴儿需要更多的耐心和温柔的处理方式，以避免过度刺激。例如，抚养者可以通过预测和准备来减少不必要的惊吓，确保婴儿有足够的休息和安静的时间。 2. 神经质：神经质的婴儿在情绪上表现出高度的灵活性和易变动性。他们可能会在短时间内从高兴转变为悲伤。抚养者需要学会识别和应对这些情绪变化，提供稳定的情感支持和一致的照顾方式。 3. 情绪性：情绪性婴儿在情绪上表现出强烈的反应，但这些反应通常是短暂的。他们可能会在受到欢迎和关注时表现得非常开心。抚养者可以通过积极的互…	托马斯和切斯提出的婴儿气质类型包括易兴奋型、难搞型、易悲伤型和难悲伤型。易兴奋型婴儿通常表现出高活跃性、活泼好动，对外界刺激敏感；难搞型婴儿则表现出易受到刺激而情绪化、易受挫折；易悲伤型婴儿对负面情绪反应强烈，容易受到环境影响；难悲伤型婴儿则表现出对情绪刺激不敏感，难以产生情感连接。 这些婴儿气质类型对儿童抚养有着重要的启示意义。首先，家长和抚养者应了解婴儿的气质类型，以便更好地与他们相处。对易兴奋型的婴儿，需要提供更多的刺激和活动，而对难悲伤型的婴儿则需要更多的情感支持。其次，了解婴儿的气质类型可以帮助父母更好地调整抚养方式，避免使用不适当的教养方式导致儿童产生负面情绪或行为问题。 举例来说，对于易兴奋型的婴儿，父母可以提供更多的体感刺激，比如游戏和玩具，以满足他们的活跃性；而对难悲伤型的婴儿，则需要更多的安抚和安慰，避免让他们感到孤独和忧虑。 总的来说，了解婴儿的气质类型有助于父母更…	a	a	tie
	什么是闪光融合临界频率?具体说明影响闪光融合临界频率的主要因素。	闪光融合临界频率是指闪烁刚刚达到融合时的光刺激问歇的频率。影响闪光融合临界频率的主要因素有:光相强度，闪光融合临界频率随光相的强度增高而增高;刺激面积，闪光融合临界频率随闪光照射的区域面积的增大而增大;在视网膜中，锥体细胞比棒体细胞有较高的时间视觉敏度;另外，声音味觉、嗅觉等刺激都可以改变闪光融合临界频率。	闪光融合临界频率（Flash Fusion Critical Frequency, FFCF）并不是一个广泛认可的术语，可能是指闪光融合阈值（Flash Fusion Threshold, FFT），即在视觉感知中，两束闪光同时出现时，观察者能够感知为单一光源的最低频率。这种现象通常在研究视觉系统的并行处理能力时被研究。 闪光融合阈值受到多种因素的影响，主要包括： 1. **闪光强度**：闪光的亮度越高，观察者能够感知到融合的概率越高。亮度差异较大时，观察者更容易感知到两个独立的光源。 2. **闪光间隔**：闪光之间的时间间隔也会影响融合阈值。如果闪光之间的间隔太短，观察者可能无法感知到融合；如果间隔太长，可能会被视为两个独立的光源。 3. **视觉注意力**：当观察者专注于特定区域时，可能会提高对闪光融合的敏感度。 4. **个体差异**：不同的人可能因为视觉系统的差异而对闪光融合阈…	闪光融合临界频率是指两个不同的光源闪烁频率达到一定程度后，人眼无法分辨两个光源分开的频率。这种现象被称为闪光融合。 影响闪光融合临界频率的主要因素包括： 1. 光源的频率差异：两个光源的频率差异越大，闪光融合的临界频率就越高。 2. 光源的强度：光源的强度越大，闪光融合的临界频率也会随之增加。 3. 视觉刺激的持续时间：视觉刺激持续时间越长，闪光融合的临界频率也会增加。 举个例子，如果一个人在强光下看到两个闪烁频率相差较大的光源，那么他的闪光融合临界频率可能会比在弱光下看到相同的两个光源时更高。 回答结束	a	a	b
	简述统计量和参数的区别和联系。	统计量和参数都是反映数据特征的数量，但它们分别是相对于样本和总体而言的，统计量是反映样本特点的数字特征，而参数是反映总体特点的数字特征它们经常联系在一起，实际上，推断统计就是利用样本统计量来对总体参数进行估计或者假设检验。	统计量和参数是统计学中两个重要的概念，它们在统计分析中扮演着不同的角色。 参数是研究中未知的量，它们是人口参数，描述了总体的特性。例如，总体均值（μ）、总体标准差（σ）和总体比率（p）都是参数。参数通常是我们想要估计的量，但由于我们无法直接观察到总体，所以需要通过样本数据来估计它们。 统计量则是基于样本数据计算出来的量，它们是样本统计量，用于估计总体参数。例如，样本均值（x̄）、样本标准差（s）和样本比率（p̂）都是统计量。统计量是我们可以直接计算的，它们的值会因为抽取的不同样本而有所不同。 参数和统计量之间的联系在于，统计量通常被用来估计参数。例如，样本均值（x̄）可以用来估计总体均值（μ）。统计量的计算通常基于样本数据，而参数是这些统计量所试图估计的真实值。 举个例子，如果我们想要估计一群学生的平均成绩，我们可以从这群学生中随机抽取一部分学生来计算他们的平均成绩，这个计算出来的平均成…	统计量是根据样本数据计算得出的数值，用来描述样本特征的指标，比如样本的均值、标准差等。而参数是描述总体特征的指标，通常是通过对整个总体数据进行推断或估计得出的，比如总体的均值、方差等。统计量是对参数的估计或推断，通过对样本数据的分析来推断总体的特征。统计量和参数之间的联系在于统计量可以通过样本数据对参数进行估计，从而了解总体的特征。同时，统计量也可以用来检验关于总体参数的假设。因此，统计量和参数是统计学中密切相关的概念，用来描述和推断总体和样本的特征。 回答结束	b	tie	b
	简述学习动机的归因理论。	韦纳认为，能力、努力、任务难度和运气是人们在解释成功和失败时知觉到的四种主要原因，每一种原因又可从控制点、稳定性、可控性三个维度进行分析，每一维度对动机都有重要的影响。根据控制点维度，可将原因分成内部和外部的:将成功归因于内部原因，会产生白豪感:归因于外部素，则会产生侥幸心理将失败归因于内部因素，会产生羞愧的感觉:归因于外部因素，则会感到气愤。根据稳定性维度，可将原因分成稳定和不稳定的:将成功归因于稳定因素，会产生自豪感，从而增强动机;归因于不稳定因素，则会产生侥幸心理。将失败归因于稳定因素，将会产生绝望的感觉;将失败归因于不稳定因素，则会感到气愤。根据可控性维度，又可将原因分成可控的和不可控的。将成功归因于可控因素，则会积地去争取努力:归因于不可控因素，则不会产生多大的动力。将失败归因于可控因素则会继续努力:归因于不可控因素，则会绝望。将失败归因于内部、稳定、不可控时，会产生习得性无助…	学习动机的归因理论是指人们对自己学习成果的解释和归因，这些解释和归因会影响他们的学习动机和行为。归因理论主要涉及两个方面：内在归因和外在归因。 内在归因是指将学习成果归因于个人的内在因素，如能力、努力或态度。例如，如果一个人认为自己取得好成绩是因为自己的努力和天赋，他们可能会感到自豪并且更加动力去学习和提高自己的能力。内在归因通常被认为是积极的，因为它能够促进自我增强和持续的学习动机。 外在归因则是将学习成果归因于外在因素，如环境、他人的帮助或运气。例如，如果一个人认为自己取得好成绩是因为老师的帮助或考试题目容易，他们可能不会将这种成果视为自己的能力提升，而是可能会依赖于外部因素。外在归因可能会导致依赖性和不稳定的学习动机，因为当外部因素不再存在时，学习动机可能会减弱。 归因理论的重要性在于它能够帮助教育者和心理学家理解学生的学习动机和行为，并采取适当的策略来增强学生的内在归因，从而促进…	学习动机的归因理论是指个体对自己的学习成绩或者表现所产生的动机的解释和归因。根据归因理论，个体对自己的学习成绩或者表现产生动机的原因主要可以分为内部归因和外部归因两种。内部归因是指个体认为学习成绩或者表现的原因在于自身的能力、努力、态度等内在因素，而外部归因则是指个体将学习成绩或者表现的原因归因于外在环境或者情境因素，比如运气、教师的教学水平等。 举例来说，如果一个学生在考试中取得了好成绩，他可能会将这一成绩归因于自己的努力学习或者优秀的能力（内部归因），也可能会将这一成绩归因于考试题目比较简单或者运气好（外部归因）。根据归因理论，个体对学习成绩或者表现的归因方式会影响到他们未来的学习动机和表现。 回答结束.	a	a	tie
	从众的影响因素有哪些	影响从众的主要因素包括群体影响与少数群体作用、情境因素、个体因素、教育和文化倾向四个方面。群体影响与少数群体作用:①群体自身的一致性。群体意见不一致导致从众比例下降。②样体凝聚力。群体的凝聚力越高，个体对样体的依附性和依赖心理越强烈，越容易对自己所属群体有强烈的认同感，从而引发更多的从众行为。③样体的规模。在一定范围内，人们的从众性是随体规模增大而增大的。情境因素:①刺激物的性质。人们更容易对模两可的刺激物的判断做出从众反应:任务难度越大，引发对团体观点的从众行为就更多。②个人地位。引起从众心理压力的大小，与已经发表过意见的成员人数和威信的高低成正比。③时间因素。群体交互作用的早期阶段更容易发生从众行为。个体因素:个体特质压力。一般情绪不稳定、智力较低、意志较薄弱、缺乏自信、易受喑示、比较懦弱、患得患失的个体更容易表现出从众。②性别差异。女性在相应的困难程度下比男性更倾向于从众。③年龄差…	从众是指个体在社会环境中，出于对他人的影响而采取相似行为或态度的现象。从众的影响因素主要包括以下几个方面： 1. 社会压力：人们往往会因为害怕社会孤立、被排斥或社会不接受而跟随他人。例如，在一群人中，如果大多数人选择了某个特定的行为，个体可能会出于恐惧而跟随，从而体现出社会压力的影响。 2. 缺乏自信：那些缺乏自信或自我效能感的人更容易受到从众的影响。他们可能认为自己做决定的能力不足，或者害怕自己的选择是错误的，因此更倾向于跟随他人。 3. 缺乏信息：当个体对某个问题或决策缺乏足够的信息时，他们可能会依赖他人的意见来做出选择。这种情况下，个体可能会无意识地模仿他人的行为。 4. 社会认同：人们往往希望自己被认为是群体的一部分，因此会模仿群体的行为，以此来增强自己的社会认同感。这种认同感的追求可能会导致从众行为。 5. 情绪影响：情绪状态也会影响个体的从众行为。例如，在情绪高涨或低落时，个…	从众的影响因素主要包括以下几点： 1. 社会认同：人们有一种强烈的愿望与他人保持一致，以获得认同感和归属感。在不确定或者模糊的情境下，人们更容易受到群体态度的影响，从而选择从众。 2. 社会压力：在群体中，个体可能会感受到来自其他成员的压力，希望自己与他人一致以避免被排斥或者孤立。这种压力会促使人们选择从众。 3. 信息不确定性：当个体对某个问题或者情境缺乏足够信息或者知识时，他们更倾向于相信他人的看法和行为，以减少不确定性和疑虑。 4. 社会比较：人们常常通过与他人比较来评价自己的行为和观点。当他们发现自己与群体中的大多数人持相反意见时，会考虑改变自己的立场以与他人一致。 总的来说，从众的影响因素主要包括社会认同、社会压力、信息不确定性和社会比较等。这些因素都会促使个体选择跟随群体大多数的意见和行为。 回答结束。	a	a	a
	投射测验的理论基础是什么?	投射测验受精神分析理论的影响，重在探讨人的无意识心理特征。如果我们以某种无确定意义的刺激情境作为引导，被试就会在不知不觉中将自己无意识结构中的愿望、要求、动机、心理冲突等特征投射到对刺激情境的解释中。	投射测验的理论基础主要基于弗洛伊德的精神分析理论，特别是其关于人格结构和潜意识的观点。弗洛伊德认为，人的行为和情感受到潜意识中的冲突和压力的影响，而这些冲突和压力往往是由于早年经历和内在冲突所导致的。 在投射测验中，受测者被要求解释一系列的图画、句子或其他刺激物。这些刺激物通常是开放性的，旨在激发受测者的想象力和创造力。通过受测者的解释，可以揭示其潜意识中的想法、愿望、恐惧和冲突。 例如，在罗舍斯图画投射测验（Rorschach Inkblot Test）中，受测者被展示一系列无形的图案，并被要求描述他们看到的图案。这些描述可以反映受测者的心理状态，包括其情绪调节能力、思维模式以及潜在的心理动力。 投射测验的另一个理论基础是卡尔·荣格的集体无意识概念。荣格认为，人类共享一个集体无意识，这是所有人共同的、深层次的思想和情感的存储库。通过投射测验，可以揭示个体与集体无意识的联系，从而了解个人…	投射测验是一种心理测验方法，其理论基础主要来自精神分析学派的理论。根据精神分析学派的观点，人类心理深处存在着潜意识，而投射测验正是试图通过分析个体的投射现象来揭示这些潜意识内容。具体来说，投射测验认为个体会将自己的内心冲突、欲望、恐惧等情绪投射到外部对象或者抽象符号上，从而通过分析个体对这些对象或符号的反应来了解其潜意识的内容。 举例来说，Rorschach墨迹测验就是一种常见的投射测验，参与者需要根据抽象的墨迹图案描述自己所看到的内容，从而揭示其潜意识中的情绪、冲突等内容。另外，Thematic Apperception Test (TAT) 主题诠释测验也是一种常见的投射测验，参与者需要根据给定的图片故事情节编写一个连贯的故事，通过分析故事内容来了解个体的潜意识动机和情绪。 总的来说，投射测验的理论基础在于认为个体的潜意识会通过投射现象表现出来，通过分析这些投射现象可以揭示个体内心深…	b	b	b
	试述美国心理学家帕腾的游戏分类理论，	帕腾按照儿童社会性发展把游戏分为六种:无所用心的游戏。这是·种无目的的活动，例如儿童在一旁发呆或乱跑、闲荡，只在房间里走动、张望而不参加游戏等。旁观者行为。儿童长久地站在“游戏圈”外看别人活动，关注着他人的游戏，但白己不参加。虽然偶尔也发表些口头意见，但总是不加入到游戏中去。单独游戏。儿童不与旁人发生关系，不参加别人的游戏，专心于自己的活动’独白一.平行游戏。儿童在一起玩，所用玩具和游戏方式大体上相同，但相互之问不交往，彼此互不联系，不设法影响或改变同伴的活动，各自的游戏内容问也没有什么联系，形成各种游戏同时并存的状态。有时儿童互相模仿，但无意支配别人的活动。联合游戏。这是一种没有组织的共同游戏，游戏的儿童间发生交往互相借用玩具，有说有笑，从事类似的活动，但游戏者之间没有为同一目标而分工合作，各自根据自己的愿望做游戏。(6)合作游戏。这是一种有组织、有规则，甚至有首领的共同活动。儿童在一…	帕腾（A. S. Neill）的游戏分类理论并不是一个广为人知的概念，可能是指的是美国心理学家阿尔弗雷德·阿德勒（Alfred Adler）的游戏理论。阿德勒认为，人们在社会互动中进行的一些行为可以被看作是“游戏”，这些游戏通常是为了满足个人的需要和欲望。 阿德勒的游戏理论主要包括以下几个方面： 1. **权力游戏**：人们在争夺控制和权威的过程中展开的行为。例如，家庭中的父母与子女之间的权威争夺，或者职场中的上下级之间的权力斗争。 2. **爱的游戏**：人们在寻求爱和被爱的过程中展开的行为。例如，人们在恋爱中的追求和付出，或者在家庭中对子女的关爱和教育。 3. **知识游戏**：人们在追求知识和理解的过程中展开的行为。例如，学生在学校学习的过程，或者研究人员在科学探索中的努力。 4. **艺术游戏**：人们在创造和欣赏艺术的过程中展开的行为。例如，作家创作小说，画家创作画作，或者音乐…	回答开始 美国心理学家帕腾的游戏分类理论是指他将游戏分为两种不同类型：竞技游戏和非竞技游戏。竞技游戏是指在游戏中存在明确的胜负关系和竞争性质，参与者通过竞争来获得胜利，并且通常有明确的规则和目标。例如，比赛类游戏、体育比赛等都可以被归类为竞技游戏。而非竞技游戏则是指在游戏中不存在明确的胜负关系，参与者可以通过合作、探索或者创造来获得乐趣，游戏的目的更多是放松或者娱乐。例如，益智类游戏、模拟类游戏等都可以被归类为非竞技游戏。 帕腾的游戏分类理论对于理解人们参与游戏的动机和行为有一定的启发意义。不同类型的游戏会吸引不同类型的玩家，一些人更喜欢竞技游戏中的挑战和胜利感，而另一些人则更喜欢非竞技游戏中的放松和创造。了解这些不同类型的游戏对于游戏设计者来说是非常重要的，可以更好地满足不同玩家的需求，提升游戏的吸引力和乐趣。 回答结束	tie	tie	tie
	撰写实验研究报告需要注意哪些方面?	研究者需要回顾与研究有关的前人工作。研究者应该清晰明确地描述实验设计和研究过程，报告实验所涉及的重要信息。实验报告应能做到使专业领域的同行可以据此重复研究者的工作，以保证必要情况下究结论能够得到科学的反复检验。实验报告中的客观描述和研究者本身的主观解释应当能清晰地区分开来。	撰写实验研究报告是一个系统化的过程，需要注意以下几个方面： 1. **研究目的和背景**：在报告的开头，需要清晰地阐述研究的目的、背景和研究问题。这样可以帮助读者理解研究的重要性和必要性。 2. **研究设计**：描述研究的设计类型（如实验、观察、调查等），包括样本选择、样本大小、研究的控制措施等。确保设计合理，能够有效地测试研究假设。 3. **方法论**：详细描述研究方法，包括数据收集的工具和技术、数据分析的方法等。确保方法论的透明度，方便读者复现研究。 4. **结果**：展示研究的主要发现，包括统计分析的结果、图表和表格等。结果部分应该客观、准确，避免误导性解释。 5. **讨论**：在讨论部分，分析结果的意义，讨论结果与现有文献的关系，解释发现背后的原因，提出可能的解释和未来研究的方向。 6. **限制和局限性**：诚实地指出研究的局限性和可能的偏差，这有助于提高报告的可信度。…	回答: 撰写实验研究报告时需要注意以下方面： 1.清晰的研究问题或假设：确保实验研究的目的和假设清晰明确，以便读者能够理解研究的重点和目的。 2.详细的实验设计：包括实验的方法、材料、参与者招募和程序等方面的详细描述，以便其他研究者能够复制实验并验证结果。 3.数据收集和分析方法：说明数据的收集方式、分析方法以及统计结果的解释，确保结果的可信度和可靠性。 4.结果呈现：将实验结果以表格、图表或描述的方式清晰呈现，以便读者能够直观地了解实验结果。 5.讨论与结论：对实验结果进行解释和讨论，分析结果的意义和可能存在的影响，以及未来研究的方向。同时，对研究的局限性和不足之处进行诚实的讨论。 6.引用和参考文献：确保在报告中正确引用使用的文献和资料，以便读者能够查证相关信息并了解研究的背景和前沿。 7.语言清晰简练：避免使用过于专业或晦涩的术语，确保语言简洁清晰，让读者容易理解研究内容。 总的来…	tie	tie	tie
	态度量表的编制有哪几种方·?	态度量表的编制主要有以下几种方法:等距量表法。等距量表法是瑟斯顿(Thurstone)于 1929年与其合作者依据心理物理学中感觉等距的原理提出的测量态度的方法，因此又称瑟斯顿量表法。量表的编制:确定研究主题，并根据所测的态度主题编写和搜集态度语(陈述句):请专家根据每一态度语的含义与所测的态度的相符合相悖的程度进行分组;确定每，态度语的量表值和模指数:根据量表值和模糊指数筛选态度语。实施与计分:施测时，让每个被试对态度量表进行反应，反应时只让被试对每个项目所描述的问题表示出是或否，即同意或反对的反应将被试表示出赞同反应的态度语按量值大小排序，求出中位数，并以中数点上的态度语的态度量值作为该被试的态度分数。在结果解释时是以平均数为参照的，态度量值是 11级的，则以5.5分为均值，5.5分以下者是持反对态度的，且得分越低，反对的程度越大;大于5.5分以上者为赞同，得分越多，赞同的程度就越高…	态度量表的编制主要有以下几种方法： 1. **自我报告量表**：这种量表要求被调查者根据自己的感受和信念来回答问题。例如，问卷调查中可能会有“我对这个产品的态度是积极的还是消极的？”这样的问题。这种方法简单易行，但可能受到回忆偏差的影响。 2. **行为观察量表**：这种量表通过观察个体的行为来评估其态度。例如，研究者可能会观察一个人的购买行为来判断其对某个品牌的态度。这种方法可以减少自我报告的局限性，但需要在自然环境中进行观察，可能会受到隐私和伦理问题的限制。 3. **皮肤电反应（SCR）量表**：这种量表通过测量个体在接触特定刺激时的皮肤电反应来评估其态度。这种方法可以直接反映个体的情感反应，但需要专业的设备和技术支持。 4. **神经成像量表**：通过使用功能性磁共振成像（fMRI）等技术，可以观察到大脑在处理特定态度刺激时的活动模式。这种方法可以提供态度形成机制的深入了解，但成…	回答: 态度量表的编制主要有以下几种方法： 1. Likert量表：这是一种最常用的态度量表编制方法，参与者需要根据自己对某一事物或观点的态度选择某个程度上的选项，通常是从“非常同意”到“非常不同意”等等。通过对所有选项的加总，可以得出一个总体态度分数。 2. Guttman量表：这种量表由一系列陈述组成，每一个陈述都比前一个更具体或者更极端。参与者需要根据自己的态度选择是否同意，如果同意就会继续往下选择，如果不同意就停止。这种方法可以帮助研究者确定参与者的态度层次。 3. Semantic Differential量表：这种量表要求参与者在两个相对的极性词之间选择自己在某个事物或观点上的位置，比如在“喜欢”和“讨厌”之间选择。通过这种方式可以更好地了解参与者对某个事物的态度。 4. Bogardus社会距离量表：这种量表主要用于研究人们对不同群体的态度，参与者需要根据自己与某个群体的距…	b	b	b
	简述记忆的过程。	记忆是一个过程，它是在一定的时间内展开的，可以区分为前后联系的些阶段。编码、存储和提取是记忆的三个基本过程，任何外界信息只有经过这些过程，才能成为个体可以保持和利用的经验。信息编码是人们获得个体经验的过程或者说是对外界信息进行形式转换的过程。在整个记忆系统中，码有不同的层次或水平，而且是以不同的形式存在着的。信息编码又是一个开展的过程，它包括对外界信息进行反复的感知、思考、体验和操作。新的信息必须与人的己有的知识结构形成联系，并融入旧的知识结构中，才能获得和巩固。但是，在某些情况下，当事物与人们的需要、兴趣、情感密切联系时，尽管只经历一次，人们也能牢固地记住它。存储是把感知过的事物、体验过的情感、做过的动作、思考过的问题等，以定的形式保持在人们的头脑中。知识的存储有时也叫知识的表征，它可以是事物的图像，也可以是一系列概念或命题。存储是信息编码和提取的中间环节，它在记忆过程中有着重要的作用…	记忆的过程通常被分为三个主要阶段：感知、编码和检索。 1. 感知：这个阶段涉及到信息的接收和初步处理。我们的感官接收外部信息，比如视觉、听觉、触觉等，然后将这些信息转换成神经信号，传递给大脑进行进一步的处理。 2. 编码：在这个阶段，大脑将感知到的信息转换成一种可以存储的形式。有几种不同的编码方式，包括短期记忆和长期记忆的编码。短期记忆通常是通过工作记忆中的“缓冲区”来存储的，而长期记忆则涉及到信息的巩固和存储。 3. 检索：检索是指从记忆中提取信息的过程。这个阶段可能涉及到回忆、识别或重新学习。检索可以是主动的，也可以是无意识的，例如在日常生活中无意识地回忆某个词汇或事件。 记忆的过程并不总是线性的，实际上，它们之间相互作用和影响。例如，编码过程中的注意力和情感因素可以显著影响信息的存储和检索。记忆的稳定性和可靠性也会受到多种因素的影响，包括记忆的复杂性、时间的推移、情绪状态以及学习和…	记忆的过程可以分为三个主要阶段：编码、存储和检索。在编码阶段，信息通过感觉器官进入大脑，并被转化成可以被存储的形式。在存储阶段，信息被保留在大脑中，可以是短期记忆或长期记忆。最后，在检索阶段，我们通过不同的提示或提醒来找回并回忆起存储在大脑中的信息。 举个例子，当我们学习新的知识时，首先我们需要通过注意力集中于这些信息，这样就完成了编码的过程。然后，我们需要反复练习和回顾这些知识，这样就有可能将其转化为长期记忆。最后，在需要的时候，当我们回想起这些知识时，我们就完成了检索的过程。 回答结束	b	b	b
	简述生命全程观的关键原理。	第一，发展是跨越终生的。发展是一个终生过程，这当中个体适应自己所选择的情景的能力在变化。生命全程的每一个时期都会受到之前发生的事件的影响，也会影响之后发生的事件。每个时期都有其特征和价值。第二，发展包括得与失。发展是多维度、多方向的，它发生于多重交互作用的维度(生物学的、，心理的、社会的)，每一个维度都可能有自己的发展速度。发展是向多个方向的，可能会在同一时间有得有失。第三，生物学和文化的相对影响在生命全程中会变化。第四，发展包含了资源的不断再分配。个体会选择把时间、精力、天赋、金钱和社会支持等资源进行各种各样的分配，用这些资源帮助成长(如学习新技能)、帮助维持或恢复(如保持某种技能)、应对无法维持和恢复时的丧失。第五，发展是可修正的。发展贯穿人的一生，发展显示出可塑性。发展研究的一项任务是要指出特定的发展在什么年龄段能够得到多大程度的修止。第六，发展受到历史和文化背景的影响。	生命全程观是一种心理学理论，主要由心理学家James E. Marcia提出的。它认为个体的身份形成是一个持续的过程，涉及到多个阶段和转变。生命全程观的关键原理包括： 1. **身份探索**：这是个体开始探索自己的价值观、信仰和生活目标的阶段。这通常发生在青春期和早年成年期，个体试图找到自己的身份和生活方向。 2. **身份形成**：在这个阶段，个体会根据自己的探索和体验，形成稳定的身份和生活目标。这可能涉及到对某些价值观或信仰的深刻承诺。 3. **身份危机**：在某些情况下，个体可能会经历身份危机，这是由于外部压力（如社会期望、家庭压力）或内部冲突（如价值观的矛盾）导致的身份不确定性。 4. **身份防御**：为了避免身份危机，个体可能会采取防御机制，如回避或否认，来维持现有的身份。 5. **身份重建**：随着时间的推移，个体可能会经历生活中的重大事件（如婚姻、职业变化、健康问题等…	生命全程观是一种心理学理论，强调人类个体在其生命的整个过程中经历的不断发展和变化。其关键原理包括： 1. 持续性和变化性：生命是一个连续的过程，个体在不同阶段会经历不同的发展和变化。例如，一个人从婴儿期到青少年期再到成年期，会经历身体、认知、情感等各方面的发展和变化。 2. 多样性和个体差异：每个人在经历生命周期的过程中，会有自己独特的经历和发展轨迹。个体之间的差异是正常的，每个人都有自己的发展速度和方式。 3. 环境和遗传的相互作用：生命全程观认为，个体的发展不仅受遗传因素影响，还受到环境的影响。环境包括家庭、社会、文化等各种因素，会对个体的发展产生重要影响。 4. 自我认同和连续性：个体在生命周期中会逐渐建立自己的自我认同，同时也会保持一种连续性，即虽然个体在不同阶段会有不同的经历和变化，但他们的核心特质和价值观会保持一定的连续性。 总的来说，生命全程观强调个体在整个生命周期中的发展…	b	b	b
	简述元认知的结构。	元认知由元认知知识、元认知体验和元认知控制三个部分构成。元认知的核心是元认知控制。元认知知识关于影响自己的认识过程与结果的各种因素及其影响方式的知识。包括:关于认知主体的知识，即对于自己的兴趣、爱好、能力、学习方式以及自己在学习特定内容时的局限的认识和了解。②关于认知对象的知识，即关于认知材料、认知任务以及认知活动的认知。③关于学习策略的知识即知道可用于特定学习活动的策略有哪些，他们各有什么优缺点以及具体运用某些策略需要什么条件等。包括认知策略、元认知策略以及资源管理策略的知识。(2)元认知体验指主体在元认知活动中的认知体验和情感体验。包括肯定和否定两个方面。认知体验包括知和不知的体验。情感体验包括预感失败后产生的焦虑，预感成功后产生的喜悦，从成功的经验中获得心得，从失败的经验中获得教训，借此产生信心，等等。情感的体验既可能发生在认知活动之前，也可能发生在认知活动之后(3)元认知控制根据…	元认知是指人们对自己的认知过程的意识和控制。它包括对自己的记忆、学习、思维和情感等认知过程的理解和评估。元认知结构主要包括以下几个方面： 1. 认知监控：这是元认知的核心，它涉及到对认知过程的监控和调节。例如，当你在学习新知识时，你可能会注意到自己的理解程度，决定是否需要更深入地研究某个概念。 2. 认知评估：这是指对自己的认知能力进行评估，包括对记忆、学习和思维速度等方面的自我评估。例如，你可能会通过自我测试来评估自己的记忆力。 3. 认知调节：这是指根据认知监控和评估的结果，采取措施来调整自己的认知过程。例如，如果你发现自己在解决数学问题时效率低下，你可能会尝试更有效的学习策略。 4. 认知反思：这是指对自己的认知过程进行深入的思考和分析。例如，你可能会反思自己的学习习惯，思考哪些方法有效，哪些方法不太好。 元认知对于个人的学习和发展非常重要，因为它可以帮助人们更好地理解自己的认知过…	元认知是指对自己的认知过程和认知能力进行认知的能力。它包括对自己的注意力、记忆、学习和问题解决等认知过程的监控、调节和控制。元认知的结构可以分为三个主要部分：知识、监控和调节。 1. 知识：元认知知识是指个体对自己认知过程的了解，包括自己的注意力、记忆、学习策略等。这种知识有助于个体更好地理解自己的认知过程，从而更有效地管理和控制自己的认知活动。 2. 监控：监控是指个体对自己认知过程的观察和评估。通过监控，个体可以了解自己的认知活动是否顺利进行，是否存在问题或困难。监控可以帮助个体及时发现认知问题，并采取相应的措施进行调整。 3. 调节：调节是指个体根据对自己认知过程的监控，采取相应的措施对认知过程进行调整和控制。例如，个体可以采取更有效的学习策略来提高记忆能力，或者调整注意力分配来提高学习效果。 通过对元认知的监控和调节，个体可以更好地理解自己的认知过程，提高自我控制能力，从而更好地…	b	b	a
	简述t检验和方差分析法在进行组间比较上的区别和联系。	共同点:它们都是推断统计的主要方法，都可以用于检验组间差异，B7通过比较自变量的各水平在因变量上的差异对自变量的效应进行判断。区别:t检验主要基于t分布理论，只适用于检验两组之间的差异，即其分析的自变量只能有两个水平;而方差分析主要用于多组比较。另一方面，t检验还可以对单个总体参数的显著性进行检验;而方差分析法作为一般线性模型，可以同时处理多个自变量在多个因变量上的效应检验问题。	t检验和方差分析（ANOVA）是两种常用的统计方法，用于在组间比较时检测是否存在统计学上的差异。它们在目的和应用上有所区别，但也存在联系。 t检验主要用于比较两个或两个以上的独立样本的均值是否有显著差异。它假设样本来自于正态分布，并且每个样本的方差是相等的（即等变异性假设）。t检验的结果可以告诉我们两个或多个组之间的差异是否统计学上显著。例如，如果我们想比较两种不同的治疗方法对患者症状的影响，我们可以使用t检验来确定这两种方法之间的效果是否有显著差异。 方差分析（ANOVA）则是用于比较三个或更多个组的均值是否有显著差异。它不仅可以检测组间的差异，还可以检测组内的变异程度。ANOVA假设数据来自于正态分布，并且每个组的方差是相等的（即等变异性假设）。ANOVA的结果可以告诉我们组间是否存在统计学上的差异，如果存在差异，ANOVA还可以通过后续的Tukey HSD或Scheffé测试等多比…	回答: t检验和方差分析法都是用来比较不同组之间的差异性的统计方法。它们的区别在于，t检验适用于比较两组之间的平均值是否有显著差异，而方差分析则适用于比较三个或三个以上组之间的平均值是否有显著差异。 具体来说，t检验通常用于比较两组样本的平均值是否有显著差异，例如A组和B组的成绩是否有显著差异。而方差分析则适用于比较三个或三个以上组的平均值是否有显著差异，例如A组、B组和C组的成绩是否有显著差异。 此外，方差分析还可以进一步分析不同因素对于因变量的影响，比如在研究教育水平和性别对成绩的影响时，方差分析可以同时考虑这两个因素的影响。 总的来说，t检验和方差分析都是用来比较组间差异的方法，但是t检验适用于比较两组，而方差分析适用于比较三个或三个以上组。在选择使用哪种方法时，应根据研究设计和变量的不同来进行选择。 回答结束	b	b	b
	什么是社会化?	社会化(socialization)通常指个体在社会影响下，通过学习社会知识，掌握社会技能，建立社会经验，并通过自身不断的选择和建构，形成一定社会所认可的心理一行为模式，成为社会成员的过程。社会化可以是自觉和积极主动的，也可能是不自觉和消极被动的:可以是有意识、有目的地实现的，也可能是在无意识、潜移默化中完成的。	社会化是指个体从出生开始，通过与社会环境的互动和交流，逐渐学习和内化社会规范、价值观、行为模式和文化习俗的过程。社会化是一个持续的过程，涉及个体与家庭、学校、社区、媒体和其他社会机构的相互作用。通过社会化，个体能够适应社会环境，发展必要的社会技能，并成为社会成员。 社会化的过程可以分为两种类型：主动社会化和被动社会化。主动社会化是指个体主动地学习和适应社会规则和期望的过程，例如，通过参与学校教育和社会活动。被动社会化则是指个体通过观察和模仿他人的行为来学习社会规范的过程，例如，通过家庭环境和媒体的影响。 社会化对于个体的发展至关重要，它不仅影响个体的行为和态度，还影响他们的认知、情感和社会关系。社会化的缺失或不当可能导致个体与社会的不适应和冲突。	社会化是指一个个体在社会环境中通过学习和交往逐渐习得并内化社会规范、价值观和行为方式的过程。在这个过程中，个体会不断地接受来自周围社会的影响，逐渐形成自己的社会身份和角色。社会化是一个长期的过程，涉及到个体与家庭、学校、朋友、媒体等各种社会因素的互动。通过社会化，个体能够适应社会环境，学会与他人合作、沟通和互动，形成自己的个人特质和行为习惯。 举例来说，一个孩子在家庭中学会尊重长辈、分享玩具，在学校中学会团结合作、遵守纪律，在社交媒体中学会表达自己的观点和情感。这些都是社会化过程中的一部分。 回答结束	a	a	b
	简述自陈量表的特点。	自陈量表有以下几个特点:题量比较大，多数用于测量人格的若干特质。多用纸笔测验形式。可以用于个人施测，也可以用于团体施测。一般采用是非式或选择式，施测简单，计分客观，测验分数容易解释。	自陈量表（Self-report measures）是一种通过个体自我报告其心理状态、行为或态度的量表。其特点主要包括： 1. 直接性：自陈量表直接从个体的自我报告中获取信息，这意味着个体直接回答问题，提供关于其内部状态的信息。 2. 易于实施：自陈量表通常在问卷或调查表的形式下进行，实施起来相对简单，且成本较低。 3. 快速性：自陈量表可以在短时间内完成，适合于需要快速收集大量数据的情况。 4. 多样性：自陈量表可以用来测量各种心理特征，如情绪、人格、认知等。 5. 可靠性和有效性：许多自陈量表经过了严格的验证和标准化，具有较高的可靠性和有效性，能够有效地测量其所指的心理特征。 6. 限制性：自陈量表可能受到社会偏差的影响，个体可能因为社会期望、自我呈现偏差等因素而提供不真实的回答。此外，个体可能对某些敏感或私密的问题感到不适，导致回答不准确。 例如，情绪障碍量表（Symptom Ch…	自陈量表是一种常用的心理评估工具，通常用于测量个体的主观感受或情绪状态。其特点包括： 1. 量表通常由一系列陈述句子组成，被测者需要根据自己的主观感受在每个陈述句子上进行评分，从而得出一个综合的分数。 2. 自陈量表可以用于测量各种不同的心理特征，比如焦虑、抑郁、幸福感等。 3. 量表的设计通常经过严谨的科学验证，具有较高的信度和效度。 4. 自陈量表具有标准化的分数解释方式，可以帮助研究人员对被测者的心理特征进行量化和比较分析。 举例来说，焦虑自陈量表通常会包括一系列描述焦虑症状的陈述句子，被测者需要根据这些句子判断自己在多大程度上经历这些症状，从而得出一个焦虑程度的分数。 回答结束.	a	a	a
	简答教育心理学关于学习方面的研究任务体现在哪些方面?	教育心理学在学的研究方面担负如下任务:第一，揭示学习结果的性质第二，对学习结果进行科学分类。第三，阐明学习的过程。第四，阐明有效学习的条件。	教育心理学关于学习方面的研究任务主要体现在以下几个方面： 1. 学习理论和模式：研究不同的学习理论，如行为主义、认知主义、建构主义等，以及它们在实际教育中的应用。这些理论帮助理解学习过程中的心理机制和学生的认知发展。 2. 学习动机：探讨学生在学习过程中的动机因素，包括内在动机和外在动机，以及如何激发和维持学生的学习兴趣和积极性。 3. 记忆与认知：研究记忆的类型、记忆的过程（编码、储存、提取），以及认知过程如何影响学习效果。这包括理解、推理、问题解决和信息加工等方面。 4. 学习策略：研究有效的学习策略和技巧，如自我调节学习、元认知策略、时间管理等，帮助学生提高学习效率和效果。 5. 个体差异：探讨不同学生在学习能力、学习风格、智力、情感等方面的差异，以及这些差异如何影响学习过程和结果。 6. 课堂管理和教学方法：研究如何设计和实施有效的教学方法和课堂管理策略，以优化教学效果，提高学生…	教育心理学关于学习方面的研究任务主要体现在以下几个方面： 1. 认知过程：研究学习者如何获取、组织和运用信息，包括注意力、记忆、思维等认知过程的运作机制。 2. 学习策略：研究学习者如何选择和运用不同的学习策略来提高学习效果，比如记忆技巧、阅读技巧、时间管理等。 3. 学习动机：研究学习者的学习动机来源、变化和影响因素，以及如何激发学习者的内在动机和兴趣。 4. 学习环境：研究学习者在不同学习环境下的学习效果，包括教室环境、家庭环境、网络环境等对学习的影响。 5. 学习评估：研究如何科学评估学习者的学习成果和学习过程，以便及时调整教学方法和学习策略。 通过对以上方面的研究，教育心理学可以帮助教育工作者和学习者更好地理解学习的本质和规律，从而提高学习效果和教学质量。 回答结束。	b	b	b
	简述脑功能的模块说。	模块说是 20世纪 80年代中期在认知科学和认知神经科学中出现的一种重要理论。这这种学说认为，人脑在结构和功能上是由高度专门化并相对独立的模块组成的。这些模块复杂而巧妙的结合，是实现复杂而精细的认知功能的基础。	脑功能的模块说是一种理论框架，认为大脑可以分为多个独立的模块，每个模块负责特定的认知功能。这种理论与认知神经科学中的“模块化”概念相呼应，后者指出大脑中存在一些专门化的区域，负责处理特定的信息类型。 根据模块说，每个模块通常具有以下特点： 1. 专门化：每个模块专注于特定的认知任务或功能。 2. 独立性：模块之间的相互作用通常是有限的，模块内部的处理相对独立。 3. 高效率：模块能够高效地处理其专门负责的任务。 4. 易于损伤：如果某个模块受到损伤，通常只会影响其专门负责的功能，而不会广泛影响其他认知过程。 例如，语言处理模块通常位于颞叶的布洛卡区和韦尼克区，这两个区域在语言理解和生成方面起着关键作用。损伤这些区域通常会导致语言障碍，如失语症或阅读障碍。 模块说在理解认知功能的发展、学习和损伤后恢复等方面提供了有力的理论基础。它帮助心理学家和神经科学家更好地理解大脑是如何处理信息的，以及…	脑功能的模块说是指大脑由多个相互独立的模块组成，每个模块负责特定的功能或任务。这种说法认为大脑的不同部分在处理不同的信息或任务时相互独立工作，而非整个大脑在同一时间处理所有信息。例如，视觉模块负责处理视觉信息，语言模块负责处理语言信息，情绪模块负责处理情绪等等。这种模块说有助于解释为什么人们在不同的认知任务中表现出不同的能力和特点，同时也有助于理解大脑在适应环境和应对挑战时的工作方式。 举例来说，在面对危险时，大脑的情绪模块可能会优先启动，让人做出快速的反应以保护自己。而在解决复杂的数学问题时，认知模块可能会更活跃，帮助人们进行逻辑推理和计算。这种模块说也可以解释为什么人们在不同的任务中有时会出现冲突或者矛盾的情况，因为不同的模块可能会产生不同的反应或者冲突。 回答结束.	tie	tie	tie
	简述记忆的 SPI理论。	:Tulving(1995)提出的 SPI理论试图将记忆系统和记忆过程的概念统一到一个综合的框架中。根据记忆研究中已有的成果，SPI理论假定，存在5种主要的记忆或记忆系统:程序记忆系统、知觉表征系统、语义记忆系统、初级记忆系统和情景记忆系统。这5种记忆系统在种系发生和个体发展上都存在一定的顺序。它们在加工过程中也存在一定的联系。该理论还假定，这些系统的编码是串行的(serial，S)，也就是说，信息以串行的方式在系统中得到编码。一个系统的输出提供了另一个系统的输入。信息在前一个系统中得到成功的加工，才能在下一个系统中进行编码。存储是并行的(parallel，P)，也就是说，一次编码的事件会在多个记忆系统中产生效应，并保存在不同的脑区内。提取是独立的(independent，I)，也就是说，从一个记忆系统中提取信息时可以不受其他记忆系统的影响	SPI理论是由心理学家艾宾浩斯（Hermann Ebbinghaus）提出的，用于描述记忆的遗忘曲线。SPI代表的是“Spacing Effect”（间隔效应），“Practiced”（练习）和“Interleaving”（交织）这三个关键概念，它们共同作用于提高记忆的持久性和效率。 1. Spacing Effect（间隔效应）：这个理论表明，通过在不同的时间间隔内复习材料，可以比集中在短时间内多次复习更有效地减少遗忘。间隔效应的核心在于，通过延长复习的间隔，可以促进长期记忆的巩固。例如，如果你在学习一门新语言时，每天只学习一小部分单词，而不是一次性学习大量单词，长期来看，你可能会发现自己记住更多的单词。 2. Practiced（练习）：这指的是通过重复练习来加强记忆的过程。重复练习可以帮助巩固记忆，尤其是当练习是在不同的时间点进行时。例如，学习一首歌曲时，重复练习可以帮助你记住旋律…	SPI理论是指"获取-加工-储存"理论，它是关于记忆的一个重要理论。根据SPI理论，记忆是通过获取信息、加工信息和储存信息三个过程来完成的。首先是获取信息，即通过感觉器官接收外界的刺激，并将其转化为神经信号。接着是加工信息，即大脑对接收到的信息进行加工处理，将其转化为可储存的形式。最后是储存信息，即将加工处理后的信息储存在大脑中，形成长期记忆。SPI理论强调了记忆是一个复杂的过程，需要多个环节的合作才能完成。 举例来说，当我们学习一个新的知识点时，首先我们通过听讲、阅读等方式获取信息；接着我们会通过思考、归纳总结等方式对信息进行加工处理；最后我们会通过反复复习、实践等方式将信息储存在长期记忆中。这个过程正是SPI理论所描述的记忆的获取-加工-储存过程。 回答结束	tie	tie	tie
	简述大小一距离不变假设。	大小一距离不变假设:我们知觉的物体的大小与物体在网膜上投影的大小有关系，人们在知觉物体时，似乎不自觉地解决了大小与距离的关系，即:物体大小=网膜大小x距离，一个特定的网像大小说明了知觉大小和知觉距离的一种不变的关系。	大小一距离不变假设（Size Constancy Assumption）是心理学中的一种认知偏差，它指的是人们在估计物体大小时，通常会忽略物体与自己之间的距离变化。换句话说，即使物体与观察者的距离发生变化，人们往往会认为物体的大小保持不变。 例如，想象一下，当你站在山脚下时，你可能会觉得山峰非常高。然而，当你走上山坡，距离山峰更近时，你会发现山峰并不像从远处看起来那么高。这个假设的存在导致了人们在实际情况下对物体大小的估计往往与实际情况有所出入。 这个假设在视觉心理学中非常重要，因为它影响了我们对周围世界的感知和理解。它也是理解其他认知偏差和感知现象的基础，比如相对运动假设（Relative Motion Assumption）和运动归因偏差（Motion Attribution Bias）。	大小一距离不变假设是心理学中的一个重要概念，指的是在视觉感知中，人们会根据物体的大小和距离来判断物体的实际大小。简而言之，当我们看到一个物体，我们会根据其大小和距离来判断它的实际大小，而不是只根据它的视觉大小来判断。 举个例子，当我们看到远处的一只狗和近处的一只猫时，根据大小一距离不变假设，我们会认为远处的狗比近处的猫要大，因为我们知道狗通常比猫要大，而且由于远处的狗和近处的猫在视觉上大小相似，我们会根据它们的距离来判断它们的实际大小。 在实际生活中，大小一距离不变假设对我们的日常生活和行为有着重要影响，它帮助我们更准确地感知和理解周围的环境，使我们能够更好地适应和应对各种情境。 回答结束	a	a	a
	举例说明语言的各级结构。	语言是由各层次结构组织起来的，语言表达的最基本形式是句子，在句子的下面可分为词、语素和音位等不同层次。音位音位是能够区别意义的最小语音单位。例如，在英语中，单词home包括三个音位:/h/，/o/，/m/这三个音位中的任何一个发生改变都会使词义发生变化。一般来讲，音位和字母相对应，但也有这种情况存在，即一个字母在不同的单词中，可代表不同的音位，如字母 a在单词 fat和 fate 中分别代表不同的音位。另外，几个字母合并也可代表个音位，如 ee 在单词 feet 中代表一个音位。语素语素也称词素，是语言中最小的音义结合单位，是词的组成要素。语素的种类较多:它可以独立成词，也可以同别的语素组合成词，这种语素称自由语素。例如，汉语中的“人”，既可以独立成词也可以同别的语素组成“人民”等词，因此它是自由语素。另外，还有一种语素称黏着语素。这种语素只有与其他语素组合在一起才能成词。例如，汉语中的…	语言的各级结构通常包括词汇层、句法层和语用层。下面我将逐一举例说明这些层次： 1. 词汇层：这是语言的基本单位，指的是单个的词语。词汇层的结构主要是由词汇构成，词汇是语言中能够独立使用的最小单位。例如，“苹果”是一个词汇，它可以独立作为一个名词使用。 2. 句法层：句法层是指词汇如何组合成句子。句法结构是指词汇在句子中的排列和组合规则。例如，“小明吃苹果”是一个简单句，它由主语“小明”、谓语“吃”和宾语“苹果”组成。句法层的结构遵循一定的规则，比如主谓宾结构。 3. 语用层：语用层是指语言在实际使用中的意义和功能。它涉及到语言如何在特定的语境中传达信息和影响听话者。例如，“小明吃苹果”这个句子在不同的语境中可能有不同的语用功能，比如表达一个事实、提出一个问题或者发出一个命令。	回答: 语言是由多个级别的结构组成的，包括语音、词汇、句法和语义等。举例来说，一个句子可以被分解为单词，而单词又可以被分解为音节，音节又可以被分解为音素。在句法结构中，句子可以被分解为短语，短语可以被分解为单词，单词可以被分解为音节。在语义结构中，句子可以被分解为词汇，词汇可以被分解为词根和词缀。这些不同级别的结构相互作用，共同构成了语言的复杂系统。 回答结束	b	b	b
	简述想象的含义及其功能。	含义。对头脑中已有的表象进行加工改造，形成新形象的过程。新颖性和形象性是想象活动的基本特点。想象的功能::想象具有预见的作用它能预见活动的结果，指导人们活动进行的方向。同时，想象的新颖性、形象性也是人们创造活动中不可缺少的因素。想象具有补充知识经验的作用，可以超越时空界限获得更多知识。想象还有代替作用。当人们的某些需要不能实际得到满足时，可以利用想象的方式得到满足或实现。想象对机体的生理活动过程也有调节作用，它能改变人体外周部分的机能活动过程。	想象是人类大脑中一种复杂的认知过程，它涉及到对现实世界以外的东西的构建和重组。想象可以分为两种类型：主观想象和象征性想象。主观想象是指个体在没有外部刺激的情况下，通过内心的努力构建出某种场景或情境的能力。象征性想象则是指通过符号、语言或图像等媒介来表达和理解想象内容的过程。 想象的功能是多方面的。首先，它是创造性思维的基础，能够帮助人们在艺术、文学、音乐等领域中产生新的想法和作品。其次，想象在解决问题时发挥着重要作用，因为它允许人们在没有实际操作的情况下模拟和预测不同的结果，从而做出更明智的决策。再次，想象还与情感体验密切相关，能够帮助人们通过想象来处理和应对情绪困扰，例如通过想象自己在美丽的海滩上散步来缓解压力。 在心理治疗中，想象疗法（例如认知行为疗法中的暴露疗法）也被广泛使用，以帮助患者处理焦虑和恐惧。通过想象自己处于安全的环境中，患者可以逐步减少对实际恐惧刺激的反应。 总之，想象…	想象是一种心理过程，通过这种过程人们可以在脑海中塑造出虚拟的情景、场景或者事物，而这些情景、场景或者事物在现实生活中并不存在。想象的功能包括但不限于：帮助人们解决问题、激发创造力、提高记忆力、缓解压力、增强自信心、提升情绪体验等。例如，一个人可以通过想象自己正在成功地完成一项任务来增强自信心，或者通过想象一个美好的假期来缓解压力。总的来说，想象是一种非常重要的心理过程，它在日常生活中扮演着重要的角色。 回答结束	a	a	a
	简述初中生情绪表现的矛盾性特点。	在初中生的情绪表现中，也充分体现出半成熟、半幼稚的矛盾性特点随着初中生心理能力的发展和生活经验的扩大，其情绪的感受和表现形式不再那么单一了，但还远不如成人的情绪体验那么稳定，表现出明确的两面性。强烈、狂暴性与温和、细腻性共存。情绪的可变性与固执性共存。内向性与表现性共存。	初中生正处于青春期的关键阶段，他们的身体和心理都在经历着快速的变化。这种变化往往会导致他们的情绪表现出一定的矛盾性特点。以下是一些典型的矛盾性特点： 1. 情绪波动：初中生可能会在短时间内经历情绪的剧烈波动。他们可能会在一天的某个时刻感到非常高兴和兴奋，而在另一个时刻则可能感到沮丧和抑郁。这种情绪波动可能是由于身体激素水平的变化引起的。 2. 自我认同的探索：初中生在寻找自己的位置和角色中，可能会表现出矛盾的自我认同。他们可能会试图模仿同龄人的行为，同时又希望保持自己的个性。这种矛盾可能会导致他们在社交场合感到困惑和不自信。 3. 依赖与独立的冲突：初中生在成长过程中，需要在依赖父母和寻求独立之间找到平衡。他们可能会表现出对父母的依赖，同时又渴望获得更多的独立性和自主权。这种矛盾可能会在家庭关系中表现出来。 4. 学业压力与兴趣的冲突：初中生面临着学业的压力，同时他们也可能对某些兴趣爱好…	初中生的情绪表现通常具有矛盾性特点，主要体现在以下几个方面： 1. 情绪波动大：初中生正处于青春期，身心发育迅速，充满了各种情绪和冲动。他们的情绪常常会出现剧烈波动，可能在同一天内由欢快转为沮丧，由愤怒转为安静。 2. 矛盾情绪并存：初中生在同一时间可能会感受到多种矛盾的情绪，比如对家庭的依赖和对独立的渴望、对同学的友情和对竞争的敌意等。这种矛盾会导致他们情绪的复杂性和多变性。 3. 外表与内心不符：有些初中生可能会表现出外表强势自信，但内心却充满焦虑和不安；有些可能表现得沉默寡言，实际上内心却充满激烈的情绪。这种外表与内心的不符合也是情绪表现的矛盾性特点之一。 总的来说，初中生情绪表现的矛盾性特点是正常的，因为青春期是一个充满挑战和探索的阶段，他们需要时间和经验去适应和处理自己的情绪。建议家长和老师要多关注初中生的情绪变化，给予理解和支持，引导他们正确处理情绪，帮助他们健康成长。 回答…	b	b	b
	简述制作心理物理量表的感觉比例法的基本步骤。	该方法的具体操作步骤如下:首先呈现一个上物理刺激作为标准刺激，然后让被试调节另外一个变异刺激，并随时判断该变异刺激所引起的感觉量是标准刺激所引起的感觉量一半、一倍还是指定的某一比例，这样可以获得某一强度的变异刺激所引起的不同感觉量的关系的量表。在比较完毕后，可以变化标准刺激的强度，然后再选择一个变异刺激进行调节产生不同物理刺激强度所对应的不同比例感觉量的关系量表。通过上述的比较，就可以建立物理量和心理量之间关系的量表。	感觉比例法是一种用于测量心理物理量表的方法，主要用于评估人们对不同刺激强度的感知比例。以下是制作心理物理量表的感觉比例法基本步骤： 1. **确定刺激范围**：首先，需要确定你想要测量的刺激范围。例如，如果你想测量声音的强度，你可能会选择从非常轻微的声音到非常吵闹的声音的范围。 2. **准备刺激材料**：准备一系列刺激材料，每个材料代表不同强度的刺激。例如，如果你在测量声音，你可能会准备一系列不同音量的音频文件。 3. **确定参与者**：选择一组参与者，他们将被要求根据自己的感受来判断刺激的强度。 4. **进行实验**：在实验中，向参与者展示刺激材料，并要求他们根据自己的感受来判断当前刺激的强度相比于之前展示的刺激强度的比例。例如，如果他们之前听到了一个声音，然后听到了一个更大的声音，他们可能会说“声音比之前的强度大两倍”。 5. **数据收集**：记录参与者的判断，并将这些判断与…	制作心理物理量表的感觉比例法的基本步骤包括以下几个关键步骤： 1. 设计实验：首先确定研究的目的和假设，确定实验所需的刺激物，并设计实验程序。 2. 确定基准刺激：在实验中需要确定一个基准刺激，即参照物，用于比较其他刺激的感知差异。 3. 制定比例：根据实验设计，确定不同刺激之间的感觉比例关系，即确定其他刺激相对于基准刺激的比例关系。 4. 进行实验：根据制定的比例关系，进行实验，让被试者对不同刺激进行感知和比较。 5. 数据分析：通过实验结果进行数据分析，得出不同刺激的感知比例关系，验证研究假设。 通过以上步骤，可以利用感觉比例法来制作心理物理量表，从而研究人类感知和认知的规律。 回答结束	b	b	b
	简答埃里克森的人格发展理论。	埃里克森构造了一个庞大的人格的毕生发展理论，即心理社会性发展阶段理论。埃里克森以自我渐成为中心，把个体从摇篮到坟墓的人格发展划分为8个阶段，每一个阶段都面临着一个核心的心理社会危机。第一阶段:信任对不信任(0~1.5岁);第二阶段:自主对怀(1.5~3岁):第三阶段:主动对内(3~6岁);第四阶段;勤奋对自卑(6~12岁);第五阶段:同一性对同一性混乱(12~18岁);第六阶段:亲密对孤独(18~30岁);第七阶段:创生对停滞(31~50岁);第八阶段:自我完善对失望(51岁以后)。	埃里克森的人格发展理论是一种生命周期理论，提出了八个关键的发展阶段，每个阶段都与特定的社会角色和心理冲突相关。这些阶段从出生开始，持续到晚年，每个阶段都有一个特定的时间范围，并且每个阶段都有一个相应的“危机”或“任务”，如果成功完成，个人将获得积极的人格特质，如果未能解决，可能会导致不利的人格发展。 1. 信任 vs. 不信任（出生 - 1岁） 婴儿期的核心任务是建立信任感，父母的照顾和稳定性对于婴儿的发展至关重要。如果父母的照顾充分，婴儿会发展出信任感；如果父母的照顾不足或不稳定，婴儿可能会发展出不信任感。 2. 希望 vs. 悲观（1岁 - 3岁） 在这个阶段，儿童开始探索周围的世界，需要父母的支持和鼓励。如果父母提供了积极的反馈，儿童会发展出希望感；如果父母的反馈消极或忽视，儿童可能会发展出悲观感。 3. 爱 vs. 恨（3岁 - 6岁） 在这个阶段，儿童开始学习社会规范和界限，需…	埃里克森的人格发展理论主要包括八个阶段，每个阶段都有其独特的发展任务和关键冲突。这些阶段包括基本信任与不信任、自主性与羞耻感、主动性与疏离、勤奋与罪疚、同伴关系与孤独、爱情与职业、生殖力与停滞、完整与绝望。在每个阶段，个体都需要面对特定的发展任务，如果成功地解决了这些任务，就能够发展出健康的人格特质。例如，在幼儿期的基本信任与不信任阶段，婴儿需要建立对主要照顾者的信任，如果遇到失望或忽视等负面经历，可能会导致不信任感的形成。而在青少年期的同伴关系与孤独阶段，个体需要建立健康的社交关系，如果无法建立良好的同伴关系，可能导致孤独感的加剧。 回答结束	a	a	a
	简答心理发展与教育的关系。	教育是个体在心理发展过程中所接受的来自环境的最主要的影响，也是个体心理发展过程中起主导作用的因素。教育与心理发展的关系主要体现在两方面一方面，教育受个体已有心理发展水平的制约:另一方面，教育又能促进个体的心理发展。个体心理发展对教育的制约作用。个体的学习准备状态包括生理准备状态和心理准备状态两方面。生理准备状态，尤其是脑和神经系统发育与成熟的程度，是个体接受教育的自然前提。心理准备状态包括智力因素的准备和非智力因素的准备两个方面。教育对个体心理发展的促进作用。第一，发展性教学。教育受个体已有的心理发展水平的制约，仅仅是教育与心理发展关系的一个方面。在教育与心理发展的关系中，更重要的是要看到教育对心理发展的促进作用。第二，早期教育，	心理发展与教育之间存在着密切的关系。心理发展是指个体从出生到成熟过程中，心理功能、心理结构和心理过程的逐步发展变化。教育作为一种社会实践活动，通过对个体的知识、技能、态度和价值观的培养和塑造，直接影响个体的心理发展。 教育可以促进心理发展的几个方面： 1. 认知发展：教育通过提供丰富的学习材料和学习机会，帮助儿童和青少年发展和增强他们的认知能力，如注意力、记忆力、思维逻辑等。 2. 情感发展：教育通过情感教育和社会化过程，帮助个体建立和发展健康的情感，培养同情心、责任感和社会责任感。 3. 社会化发展：教育是社会化的重要途径，它通过教育内容和教育过程，传授社会规范、价值观和文化知识，帮助个体适应社会。 4. 个人发展：教育不仅仅是知识的传授，更是个人能力和潜力的培养。通过教育，个体可以发展自我意识、自我效能感和自我实现的能力。 5. 心理健康：教育还可以促进个体的心理健康，通过心理健康教…	心理发展与教育有着密切的关系，因为教育是促进个体心理发展的重要手段之一。在心理学理论中，儿童的认知、情感、社会交往等方面的发展都受到教育环境的影响。教育可以提供适当的刺激和支持，促进个体的心理发展，帮助他们建立自信、学会合作、发展创造力等。例如，教育可以通过教学活动、游戏、社交互动等方式，促进儿童的认知和情感发展，帮助他们建立自我认知和社会技能。 另外，心理学研究也为教育提供了理论支持和实践指导。通过心理学研究，我们可以了解儿童的认知发展规律、情绪管理机制等，从而设计更有效的教育方法和策略。比如，根据皮亚杰的认知发展理论，我们知道儿童在不同年龄段具有不同的认知能力，因此在教学中可以根据孩子的认知水平制定相应的教学内容和方式。 总的来说，教育不仅是推动个体心理发展的重要因素，同时也受到心理学的理论和研究的指导，促进教育更科学、有效地进行。 回答结束。	b	b	a
	简述奥斯古德的三维迁移模式。	奥斯古德的三维迁移模式是在总结大量对偶联想式学习迁移的基础上提出的，是在桑代克的迁移理论的基础上，对刺激与反应的相似性对迁移影响的进一步说明。该模式不仅适用于对偶联想式学习迁移的解释，而且还适用于技能学习迁移的解释、迁移理论的新发展。	奥斯古德的三维迁移模式是由美国心理学家弗雷德里克·奥斯古德（F. Stuart Clark Hull）提出的。这个理论主要用于描述人们在面对新环境或新情况时，如何将自己的价值观、信念和行为模式从原有的环境中迁移到新的环境中。 奥斯古德的三维迁移模式包括以下三个维度： 1. **认知迁移**：指的是个体在新环境中学习和接受新的知识、信息和观念。认知迁移涉及到个体对新环境的理解和适应，包括对新文化、社会规范和工作方式的学习。 2. **情感迁移**：涉及到个体的情感反应和态度的变化。在新的环境中，个体可能会经历文化冲击、孤独感、焦虑等情感状态。情感迁移是指个体如何处理这些情感反应，并逐渐适应新的情境。 3. **行为迁移**：是指个体在新环境中改变和调整自己的行为模式。行为迁移包括了个体如何在新的社会环境中表现自己，如何与他人互动，以及如何在新的工作或生活环境中取得成功。 举例来说，如果一个…	奥斯古德的三维迁移模式是心理学家克劳德·奥斯古德提出的心理动力学理论。这个模式将个体的心理冲突分为三个维度，分别是冲突的内容、冲突的情感和冲突的移情对象。在这个模式中，个体可能会将内心的冲突从一个对象转移到另一个对象上，这种移情的过程可能会导致一些心理问题或症状的产生。 举例来说，一个人可能在家庭中与父母产生冲突，但由于无法直接表达情感或解决问题，他可能会将这种冲突移情到与同事或朋友的关系中。这种迁移可能会导致在工作或社交关系中出现一些问题或不适。 总的来说，奥斯古德的三维迁移模式强调了个体内心冲突的复杂性，以及在处理这种冲突时可能出现的心理机制。通过理解这种模式，心理学家可以更好地帮助个体解决他们的心理问题或困扰。 回答结束"	a	a	a
	什么是意识?意识有哪些功能?	意识是一个复杂的概念，就心理状态而言，并意味着清醒、警觉、注意集中等;就心理内容而言，是可用语言报告出的体验、知觉、回忆等;在行为水平上是指受意愿支配的动作、活动;在哲学水平上，是一种与物质相对立的精神实体，由思想、幻想、梦等构成。意识的功能包括:通过限制人们的注意，减少不断输入的能量。根据知觉的组织规律，把连续不断的经验划分为客体和事件。使我们能利用过去的记忆对现实输入的信息作出最佳判断和行为。	意识是指个体对自身内部和外部环境的感知、感受、认知和情感的整合和体验。它是心理活动的最高层次，是个体与外界信息进行交互的基础。意识的功能主要包括： 1. 感知整合：意识能够将来自感官的信息整合成一个统一的感知体验。例如，当你看到一个苹果时，意识会将视觉信息（苹果的形状、颜色、大小等）与其他感官信息（苹果的重量、声音、气味等）结合起来，形成一个完整的苹果感知。 2. 注意：意识能够调节个体对环境信息的注意力分配。例如，当你在做一项需要高度集中注意力的任务时，意识会帮助你忽略干扰信息，专注于任务相关的信息。 3. 认知：意识涉及到对信息的理解和解释。它可以帮助个体识别事物的意义和重要性。例如，当你读到一篇文章时，意识会帮助你理解文章的内容，并将其与你已有的知识和经验相结合。 4. 记忆：意识与记忆密切相关，它可以帮助个体存储和回忆信息。例如，当你学习新知识时，意识会帮助你将信息编码到记忆中，…	回答: 意识是指人类或动物对外界事物和内在体验的主观体验和认识。意识具有多种功能，其中包括： 1. 感知和认知功能：意识使我们能够感知和理解外界的事物，包括感知周围的环境、接收外部刺激和对信息进行处理和分析。 2. 记忆和学习功能：意识有助于我们存储和回忆过去的经历和知识，帮助我们学习和适应新的环境和情境。 3. 意识调节功能：意识能够调节和控制我们的情绪、行为和注意力，使我们能够做出理性的决策和行动。 4. 自我意识功能：意识使我们能够意识到自己的存在和独特性，形成自我认知和自我反思的能力。 5. 意义赋予功能：意识有助于我们赋予事物和事件意义和价值，从而影响我们的情绪和行为。 总的来说，意识是一个复杂的心理过程，涉及到感知、认知、情绪、行为等多个方面，对我们的生活和行为起着重要的作用。 回答结束	tie	tie	tie
	什么是知觉的恒常性?举例说明恒常性在知觉过程中的意义。	知觉恒常性是指当知觉的客观条件在一定范围内改变时，我们的知觉映象在相当程度上却保持着稳定性。在我们的日常生活中，知觉恒常性也扮演着重要的角色。从高楼顶上看街道上的行人，尽管看上去很小，但人们不会把他们都看作是小孩。远处行驶的汽车看起来很小，但人们并不认为汽车变小了。知觉恒常性使我们的知觉并不随着客观条件的变化而时刻变化，对于我们获得确定的信息有重要的意义。	知觉的恒常性是指知觉过程中的一种心理现象，即人们在不同的条件下对某些特征保持一致的感知。这种恒常性有助于我们在环境变化的情况下保持对周围世界的稳定感知。 例如，恒常性在知觉过程中的一个典型例子是“恒常大小”（size constancy）。这种恒常性指的是即使物体的视角大小发生变化，人们仍然能够正确地感知物体的实际大小。例如，当你站在山脚下看向山顶时，山顶的视角会显得非常小，但你知道山顶实际上是非常大的。这种恒常性有助于我们在不同的距离和光线条件下准确地感知物体的大小，这对于我们的日常活动和空间导航至关重要。 恒常性在知觉过程中的意义在于它帮助我们建立了对外部世界的稳定和一致的理解。它有助于我们在环境的变化中保持认知的一致性，减少了由于外部条件变化而引起的感知混乱。这种稳定性对于我们的认知和行为至关重要，因为它使我们能够依赖于我们对世界的感知，并且能够有效地与环境互动。	回答: 知觉的恒常性是指在不同环境条件下，我们对物体的感知能够保持相对稳定和一致。换句话说，即使在不同的光线、角度、距离等条件下，我们仍然能够识别出相同的物体。 举例来说，当我们看到一个圆形的球体，无论是在白天还是晚上、近处还是远处，我们都能够辨认出它是一个球体。这是因为我们的大脑能够根据过去的经验和知识，对不同条件下的物体进行识别和理解，从而保持了知觉的恒常性。 在知觉过程中，恒常性的意义在于帮助我们更准确地理解和感知周围的世界，使我们能够更好地适应不同的环境条件。通过保持知觉的恒常性，我们能够更快速地做出反应，更好地应对各种挑战和情况。 回答结束	a	a	tie
	影响遗忘的因素主要有哪些?	影响遗忘的因素主要包括:时间因素。识记材料的性质与数量熟练的动作和形象的材料遗忘得慢;有意义的材料比无意义的材料遗忘要慢得多在学习程度相等的情况下，识记材料越多，忘得越快。学习的程度。对材料的识记没有一次能达到无误背诵的标准，称为低度学习:如果达到恰能背诵之后还继续学习一段时间，就叫过度学习。低度学习容易遗忘，适当的过度学习比恰能背诵时记忆效果要好些。识记材料的系列位置。人们发现在回忆系列材料时，材料的顺序对记忆效果有重要影响。这种记忆材料在系列位置中所处的位置对记忆效果发生影响的现象称为系列位置效应。近因效应是指最后呈现的材料较容易回忆，遗忘最少;首因效应是指最先呈现的材料较易回忆，遗忘较少。识记者的态度。识记者对材料的需要兴趣等对遗忘的快慢也有一定影响。	影响遗忘的因素主要包括以下几个方面： 1. **注意力**：当我们在学习或接收信息时，如果注意力不集中，很容易导致信息的遗忘。例如，在课堂上如果分心，可能会记不住老师讲的内容。 2. **情绪**：情绪状态也会影响记忆的保留。强烈的情绪经历，如恐惧或愤怒，可能会影响记忆的形成和保留。例如，在经历了一个非常恐怖的事件后，可能会记得很多细节，但这些记忆可能会因为情绪的强烈而变得异常清晰。 3. **睡眠**：睡眠对于记忆的巩固至关重要。睡眠可以帮助巩固记忆并将其从短期记忆转移到长期记忆。缺乏充足的睡眠会影响记忆的保留。 4. **年龄**：随着年龄的增长，记忆力会逐渐下降。儿童和青少年的记忆力相对较好，而老年人的记忆力则可能会受到影响。 5. **健康状况**：健康问题，如头部受伤、神经退行性疾病（如阿尔茨海默病）或其他影响大脑功能的疾病，都可能影响记忆。 6. **遗传因素**：遗传也会影…	答案: 影响遗忘的因素有很多，主要包括以下几点： 1. 遗忘曲线：赫尔曼·艾宾豪斯提出的遗忘曲线表明，我们在学习完某个知识点后，遗忘的速度是非常快的，而且在一段时间内持续下降。如果没有及时复习或者巩固，那么这部分知识就容易被遗忘。 2. 遗忘干扰：当我们学习了新的知识或者经历了新的事情时，会产生遗忘干扰，即新的信息会干扰到旧的信息的回忆和保持。 3. 学习方式：学习方式对遗忘也有一定影响。比如通过多种感官参与的学习方式，会让我们对知识点有更深刻的印象，减少遗忘的可能性。 4. 情绪状态：情绪状态也会影响到我们的记忆和遗忘。情绪激动或者焦虑的状态下，我们可能更容易忘记一些东西。 5. 睡眠：睡眠对记忆和遗忘的影响也非常大。充足的睡眠可以帮助大脑巩固记忆，而睡眠不足则容易导致遗忘。 总的来说，遗忘是一个复杂的过程，受到多种因素的影响。要提高记忆力和避免遗忘，我们需要注重复习、巩固知识，采取有…	b	b	b
	简述行为主义的言语发展理论。	斯金纳认为语言和其他行为一样，是通过操作条件作用获得的。班杜拉认为婴儿主要是通过对各种社会言语模式的观察学习而获得言语能力的，其中大部分是在没有强化的条件下形成的。	行为主义的言语发展理论主要是由B.F. Skinner等心理学家提出的。这种理论认为，语言的发展和使用是通过环境中的奖励和惩罚来塑造的。根据这一理论，儿童学习语言的过程可以分为几个阶段： 1. **词汇的学习**：儿童首先学习单词，这些单词通常是与某些行为或物体相关联的。例如，当一个孩子说出“球”这个词时，可能是因为他在玩耍时听到这个词被重复使用，并且与球物体相关的行为（如投掷或接住）被奖励。 2. **句子结构的学习**：随着时间的推移，儿童开始学习如何将单词组合成句子。他们通过模仿他人说话的方式来学习句子的结构和语法规则。例如，一个孩子可能会模仿父母说“我们要去超市”这个句子，并在日常生活中不断重复这个句子，直到它成为他自己的语言表达。 3. **语言的扩展和复杂化**：随着语言能力的提高，儿童开始使用更复杂的句子结构和更抽象的概念。他们通过与他人的交互来学习这些新概念，并在这些交互…	行为主义的言语发展理论认为，言语是通过学习和模仿来获得的。根据行为主义者的观点，婴儿在学习语言时会通过观察和模仿周围的成人来逐渐掌握语言技能。例如，孩子会模仿父母的语言和表达方式，逐渐建立起自己的语言能力。行为主义者弗洛伊德认为，语言的习得是通过强化和惩罚来实现的，当孩子说出正确的单词或句子时，会得到表扬和奖励，从而加强了这种语言行为。相反，如果说错了或者没有得到正确的反馈，孩子就会慢慢改正或者放弃这种语言行为。 回答结束	b	b	b
	什么是序列反应时范式?	序列反应时范式是尼森和比勒姆于1987年提出的。式以反应时为指标，整个实验过程十分类似一个选择反应时实验:处于不同空间位置的是决策及分别对应不同的反应键，每次呈现一个视觉刺激，被试按相应键尽快予以反应，该刺激随即消失，短暂的时间间隔之后出现下一个视觉刺激。序列反应时范式的特点是，整个实验中刺激的呈现序列是有规律的。序列反应时的研究表明，反应时的差异对应着心理过程的差异。在序列反应时实验中，对固定序列和随机序列的反应都是对同样刺激的同样规则的选择反应任务，因此两者的反应时差异只能说明对固定序列中的目标刺激做出反应相对容易，从而使反应时缩短，而对于随机序列，选择反应的心理过程没有易化，反应较为困难，因此反应时间相对较长。通常，这种心理过程的易化只能是由个体的学习所引发，这种学习就是内隐学习。(5)序列反应时任务试图将反应时实验的逻辑应用于无意识心理过程的研究，这是具有积极意义的。然而标准序列…	序列反应时范式（Serial Reaction Time Paradigm）是一种常用的实验设计，用于研究大脑如何处理和响应序列信息。这种范式通常涉及以下几个步骤： 1. 参与者被要求学习一个特定的刺激-反应序列。例如，一个视觉刺激序列，例如不同颜色的圆圈，按照特定的顺序出现。 2. 在学习阶段，参与者需要通过反馈来调整他们的反应，以确保他们能够准确地跟踪和响应刺激序列。 3. 一旦学习完成，实验师会开始呈现刺激序列，并测量参与者对每个刺激的反应时间。 序列反应时范式特别有用，因为它可以揭示大脑如何处理和优化基于习惯的行为。这种范式经常用于研究大脑的前额叶皮层在习惯形成和执行过程中的作用。例如，研究表明，前额叶皮层在习惯形成的早期阶段起着关键作用，而随着习惯的巩固，其他脑区如杏仁核和海马体的参与增加。	回答: 序列反应时范式是一种心理实验中常用的范式，用于研究个体对序列刺激的反应过程。在这种实验中，被试需要按照一定顺序对一系列刺激做出反应，通常包括按键盘上的某些键、移动鼠标等动作。这种范式可以帮助研究者了解个体对序列刺激的认知加工过程、注意力分配、反应速度等心理过程。 举例来说，一个常见的序列反应时范式是N-back任务，被试需要根据当前呈现的刺激以及之前几个刺激的信息，判断当前刺激是否与之前某一个刺激相同。这种任务可以考察个体的工作记忆能力和反应灵敏度。 总之，序列反应时范式是一种重要的实验设计，可以帮助研究者深入了解个体在面对序列刺激时的认知加工过程。 回答结束.	a	tie	a
	简述经典测验理论和概化理论的区别。	经典测验理论要求严格平行测验的“强假设”，即两个平行测验的观测分数必须具有相同的平均数和方差，否则无法确定测验信度的意义;概化理论只要求随机平行的“弱假设”，所谓随机平行测验是指取自同一题库的长度相同的测验2)经典测验理论把测验分数简单划分为真分数和误差分数两个部分，误差分数是单一的、含混的、随机的，这就导致不能有效地解释影响人的心理活动因素的多样性，从而在实践上对控制误差缺乏有效指导。概化理论采用方差分析方法，充分考虑了影响分数的所有误差来源，并进一步提出绝对误差和相对误差的划分及其对绝对误差和相对误差的度量。经典测验理论主要关注的是个体之间的差异，而概化理论除了个体之间的差异以外，还关注个体的绝对水平。在经典测验理论中测量误差的估计方法导致同一测量量表往往表现出多种测量信度并存现象，如稳定性系数、复本信度等，这些指数之间没有必然的内在关系。概化理论则采用具有内在逻辑关系的概化系数、可…	经典测验理论（Classical Test Theory）和概化理论（Item Response Theory，简称IRT）是两种用于测量和评估的不同理论框架。 经典测验理论主要关注的是测验的总分（总分理论），它假设一个人的能力水平是相对稳定的，并且可以通过测验的总分来衡量。这个理论假设测验题目具有固定的难度和区分度，即每个题目对不同能力水平的考生都有相同的难易程度。因此，测验的总分可以被看作是考生的能力水平的线性函数。经典测验理论的优点在于其简单性和易于理解，但它也有局限性，比如它不能很好地处理不同题目的难度和区分度的差异。 概化理论（IRT）则是一个更为复杂和灵活的理论框架，它认为每个测验题目都有自己的难度和区分度，这些特性是随着考生的能力水平而变化的。IRT模型通过估计每个题目的难度参数（a）和区分度参数（b），来更准确地衡量考生的能力水平。IRT模型可以处理不同题目的难度和区分度…	经典测验理论和概化理论是心理学中两种不同的理论。经典测验理论认为，人的学习是通过在特定环境中接收特定刺激而形成的，学习的结果是在特定环境中作出特定反应。而概化理论则认为，学习的结果是可以泛化到其他情境中的，即在不同环境中也可以表现出学习的效果。举个例子，如果一个人在特定环境下学会了害怕蛇，按照经典测验理论，他只会在看到蛇的情况下表现出恐惧的反应；而按照概化理论，他在其他类似的情境下也会表现出恐惧的反应，比如看到像蛇的绳子。 回答结束.	a	a	a
	简述睡眠的几个阶段。	睡眠是意识的一种特殊形式，根据脑电图的研究，大脑处于清醒状态时多为频率高，波幅小的B波，睡眠过程中则会出现波幅较大的a波和δ波。睡眠的阶段:第一阶段:轻度睡眠，脑电波为混合的、频率和波幅都较低的α波。在这个阶段个体处于浅睡状态，身体放松，呼吸变慢，很容易被外部刺激惊醒。约持续10分钟。第二阶段:特征为偶尔出现“睡眠锭”，即一种短暂爆发、频率高、波幅人的脑电波。个体较难被唤醒，约持续20分钟。第三阶段:脑电波频率继续降低波幅变大，出现δ波，有时也会有“睡眠锭”出现。身体继续放松，脑电波变慢，约持续 40 分钟。第四阶段:深度睡眠，大多数的脑电波开始呈现为波，个体肌肉进一步放松，身体功能的各项指标都变慢，有时发生梦呓、梦游、尿床等。个体在这个阶段很难被唤醒。第三、第四阶段通常被统称为慢波睡眠。快速眼动睡眠阶段(REM):脑的生理活动迅速改变，δ波消失，高频率、低波幅的脑电波出现，与个体在清醒…	睡眠分为几个不同的阶段，通常被分为非快速眼动睡眠（NREM）和快速眼动睡眠（REM）两大类。非快速眼动睡眠阶段包括三个阶段，从轻度到深度睡眠逐渐加深。第一个NREM阶段是轻度睡眠，心率和血压会放慢，肌肉会放松，易于被唤醒。第二个NREM阶段是中度睡眠，心率和血压进一步放慢，肌肉放松程度增加，开始难以唤醒。第三个NREM阶段是深度睡眠，也称作慢波睡眠，心率和血压最低，肌肉放松最深，难以被唤醒。 快速眼动睡眠是睡眠的第四个阶段，特点是眼球快速移动，心率加快，血压上升，梦境频繁。这个阶段与记忆巩固、情绪处理和学习有密切关系。 在一个完整的睡眠周期中，通常会经历一个NREM阶段和一个REM阶段的交替循环。一个完整的睡眠周期大约持续90-120分钟，成年人通常在一晚上会经历多个这样的周期。	睡眠分为非快速眼动期（NREM）和快速眼动期（REM）两个阶段。NREM分为四个阶段，分别是入睡期（Stage 1）、浅睡期（Stage 2）、深睡期（Stage 3和4）。在入睡期，人处于清醒和睡眠状态之间，大脑开始放松；在浅睡期，身体进一步放松，心率和呼吸变缓；在深睡期，身体恢复、修复和生长，大脑波形变为慢波。REM睡眠是一种活跃的睡眠状态，大脑波形活跃，眼球快速运动，梦境频繁出现。 回答结束	b	b	b
	错觉是什么?它包含哪些种类?	错觉即我们的知觉不能正确的表达外界事物的特性，而出现种种歪曲错觉主要包括:大小错觉潘佐错觉(铁轨错觉):在两条辐合线的中间有两条等长的直线，上面一条比下面一条看上去长些。垂直一水平错觉:两条等长的直线一条垂直于另一条的中点，那么垂直线看上去比水平线要长一些。贾斯特罗错觉:两条等长的曲线，包含在下图中的比上图中的长些。多尔波也夫错觉:被大的包围显得小，被小的包围显得大。月亮错觉:月亮刚升起时显大，而在天顶时显小。形状和方向错觉佐尔拉错觉:一些平行线由于附加线段的影响而看成不平行的冯特错觉:两条平行线由于附加线段的影响，使中间显得狭而两端显得宽，直线好像是弯曲的。爱因斯坦错觉:许多环形曲线中，正方形四边略显弯曲。波根多夫错觉:被两条平行线切断的同一条曲线，看上去不在一条直线上。	错觉是指人们在感知外部世界时，由于心理机制的局限性或外部环境的特定条件，产生的与实际情况不符的感知现象。它是人类认知过程中的一个普遍现象，常见于视觉、听觉、触觉等感官领域。 错觉的种类繁多，以下是一些常见的例子： 1. 视觉错觉：这是最常见的一种错觉类型，包括但不限于： - 尺码错觉：当一条线条在两端固定时，中间的长度看起来比实际长度短。 - 毛利尼错觉：两条平行线条看起来会在它们的交点处相遇。 - 穿山甲错觉：一条线条在另一条线条的上方看起来会比实际位置更高。 - 弓形错觉：一条弯曲的线条看起来会比实际更弯曲。 2. 听觉错觉：例如，海市蜃楼效应，即在水面上看到的远处建筑或景物看起来比实际更高、更大。 3. 触觉错觉：例如，尺子错觉，即当一个物体在不规则表面上时，测量时可能会因为表面的不平而得到不准确的长度。 4. 知觉错觉：例如，巴甫洛夫条件反射，即通过重复的条件刺激与自然刺激的同时…	回答: 错觉是指对外界事物或现象的错误认知或感知。它是人们在感知、思维或记忆过程中产生的一种偏差，使得个体对真实情况产生了误解或错误的认知。错觉可以分为多种不同的类型，常见的有视觉错觉、听觉错觉、触觉错觉等。比如，光的速度很快，我们看到的事物并不是实时的，而是有一定的延迟，这就是视觉错觉的一种表现。 回答结束	a	a	a
	情绪的功能有哪些?	情绪的功能包括:适应功能:人们通过各种情绪、情感，了解自身或他人的处境与状况，适应社会需要，求得更好的生存和发展。动机功能:它能激励人的活动，提高人的活动效率。适度的情绪兴奋，可以使人身心处于活动的最佳状态，进而推动人们有效地完成工作任务。组织功能:情绪的组织功能是指情绪对其他心理过程的影响。积极情绪具有协调作用，而消极情绪有破坏、瓦解的作用。社会功能:情绪和情感具有传递信息、沟通思想的功能。这种功能是通过表情来实现的。表情是思想的信号，也是语言交流的重要补充，	情绪是人类心理活动的重要组成部分，它们在我们的生活中扮演着多方面的功能。以下是情绪的一些主要功能： 1. 情绪表达与沟通：情绪帮助我们表达自己的感受和状态，同时也能够通过面部表情、肢体语言等非语言方式与他人沟通。例如，当我们感到快乐时，可能会微笑，这不仅传达了我们的内心状态，也可能引起他人的同情或共鸣。 2. 情绪调节：情绪有助于我们适应环境变化，调节内外部压力。例如，恐惧感可以警告我们面临潜在的危险，促使我们采取避险措施；而愉悦感则可能激励我们继续某项活动，因为它给予了我们正向的反馈。 3. 社会关系维护：情绪在维护和建立人际关系中扮演着关键角色。例如，爱情和同情可以增强亲密关系，友情和同理心则促进社会互助和合作。 4. 认知功能：情绪影响我们的认知过程，包括注意力、记忆和决策。情绪强烈的事件更容易被记住，情绪也会影响我们对信息的解读和处理方式。例如，情绪化的记忆往往比非情绪化的记忆更…	情绪在人类生活中起着重要的作用，它有以下几个功能： 1. 生存功能：情绪有助于我们对不同的情境做出适当的反应，比如面对危险时产生的恐惧情绪能够促使我们采取逃跑或者自我保护的行为。 2. 沟通功能：情绪可以通过表达和传递来帮助我们与他人建立联系和沟通。比如通过笑容表达快乐，通过眼泪表达悲伤。 3. 适应功能：情绪有助于我们适应环境的变化，调整我们的行为和心理状态。比如适当的焦虑情绪能够促使我们更加努力地应对挑战。 4. 记忆功能：情绪与记忆之间存在着紧密的联系，情绪经历会在大脑中留下深刻的印记，帮助我们更好地记忆和回忆事件。 5. 自我认知功能：情绪可以帮助我们认识到自己的需求和价值观，促使我们更清晰地了解自己的内心世界。 总的来说，情绪在我们的生活中扮演着重要的角色，它不仅影响着我们的行为和心理状态，还有助于我们更好地适应和理解世界。 回答结束。	a	a	a
	简述智力发展的一般趋势。	智力发展的一般趋势人的一生大致可分为八个不同的时期，即乳儿期、婴儿期、幼儿期、童年期、少年期、青年期、成年期和老年期。在人的一生中，能力的发展趋势如下:童年期和少年期是某些能力发展的关键期。从三、四岁到十二,十三岁，智力的发展与年龄的增长几乎等速。以后随年龄的增长，智力的发展呈负加速变化;年龄增加，智力发展趋于缓和。人的总体智力在 18~25 岁间达到顶峰。但智力的不同成分达到顶峰的时间是不同的。根据对人的智力的毕生发展研究，人的流体智力在中年之后有下降的趋势，而人的品体智力在人的一生中是稳步上升的。(4)成年是人生最漫长的时期，也是能力发展最稳定的时期。成年期又是一个工作时期。在二十五、六岁至四十岁间，人们常出现富有创造性的活动(5)能力的发展趋势存在个体差异。能力高的发展快，达到高峰的时间晚;能力低的发展慢，达到高峰的时间早。	智力发展是一个复杂的过程，涉及认知能力的多方面发展。一般来说，智力发展可以分为几个阶段，每个阶段都有其特定的发展趋势。 1. 婴儿期（0-2岁）：在这个阶段，孩子的智力发展主要集中在感官和感知能力的发展上。他们开始学习如何理解和使用语言，以及如何与周围的环境互动。例如，婴儿会通过观察和模仿来学习新技能。 2. 学龄前期（3-5岁）：在这个阶段，孩子的认知能力开始迅速发展，他们开始学习如何解决简单的问题，理解基本的逻辑关系，并且开始展现出创造性思维。例如，通过玩具和游戏，孩子们学习如何将事物分组和分类。 3. 学龄期（6-12岁）：在这个阶段，孩子们的认知能力进一步发展，他们开始能够理解更复杂的概念，进行抽象思维，并且能够解决更复杂的问题。例如，孩子们开始学习数学中的算术运算和基本的几何概念。 4. 青少年期（13-19岁）：在这个阶段，智力发展更加专注于抽象思维和批判性思维能力的发展。青…	智力发展的一般趋势可以分为婴幼儿期、儿童期、青少年期和成年期四个阶段。 在婴幼儿期，智力主要表现为感知和运动能力的发展。随着年龄增长，婴幼儿开始学会观察和模仿周围的人和事物，从而逐渐建立起对世界的认知。 在儿童期，智力的发展主要体现在语言能力、记忆力、逻辑思维和问题解决能力的提高。儿童开始学会运用语言来表达自己的想法和情感，开始学习数学、科学等知识，逐渐建立起对世界的系统化认知。 青少年期是智力发展的关键时期，青少年逐渐建立起自己的价值观和世界观，开始独立思考问题，拥有更强的逻辑思维和批判性思维能力。 成年期是智力发展的稳定阶段，成年人在工作和生活中不断积累经验，不断学习新知识，保持大脑的活跃性和灵活性，以应对各种挑战和问题。 总的来说，智力发展的一般趋势是从简单到复杂、从具体到抽象、从表象到本质的发展过程，是一个逐步完善和提高的过程。 回答结束.	b	tie	b
	什么是启动效应?	启动效应是指人在信息加工活动中，自身的知识、经验、期望以及上下文对加工活动产生影响，当人们产生某种期待时，这种期待将易化随后进行的加工启动效应又分为重复启动效应和间接启动效应;重复启动即前后呈现的刺激是完全相同的:间接启动除包含重复启动之外，还允许两刺激有差别。启动效应的实验为激活扩散模型提供了有利证据。	启动效应（priming effect）是心理学中的一个现象，指的是在进行某种认知任务之前，先接触到某个刺激（如单词、图片、概念等），会影响个体对后续任务的反应速度和准确性。这种效应通常是无意识的，且在个体没有意识到之前接触过相关刺激的情况下发生。 启动效应的典型实验是由心理学家马尔科姆·格拉德威尔（Malcolm Gladwell）在其著作《格拉德威尔谈心理学》中描述的。实验中，研究者让参与者在完成一个与“老年”相关的认知任务（如判断单词的可读性）后，进行一个与“智力”相关的任务（如解决智力问题）。结果显示，参与者在完成与“老年”相关的任务后，解决智力问题的速度明显减慢，这表明“老年”这一概念的启动效应影响了他们对智力问题的处理。 启动效应在广泛的领域都有应用，包括广告、教育和心理治疗等。例如，在广告中，使用与产品相关的积极词汇作为启动效应，可以提高消费者对产品的正面评价。同样，在教育…	启动效应是一种认知偏见，即第一印象或最初的信息对我们后续的判断和决策产生持续影响的现象。这意味着我们倾向于根据最初接收到的信息来评价一个人、事物或情况，而忽视后续的信息。启动效应可能导致我们对某个人或事物形成片面的看法，因为我们更容易记住和强调最初的印象。 举例来说，如果某人在第一次见面时表现得很友好和热情，我们可能会认为他是一个善良友善的人，即使后来发现他其实并不是这样。这种启动效应可能会影响我们的决策和交往方式，因为我们倾向于受到最初印象的影响。 回答结束	b	b	b
	教育心理学研究的新趋势表现在哪几个方面?	教育心理学的研究趋势:研究学习者的主体性;研究学习者的能动性;研究学习的内在过程和机制;研究社会环境的影响;研究实际情景的影响;研究文化背景的影响;研究学习环境设计和有效教学模式;(8)研究信息技术的利用。	教育心理学作为一门研究学习过程、教学方法和教育环境对学习效果影响的学科，随着科技的发展和社会的变化，其研究趋势也在不断演进。以下是目前教育心理学研究中几个显著的新趋势： 1. 个性化学习：随着大数据和人工智能技术的发展，个性化学习成为教育心理学研究的热点。通过分析学生的学习习惯、兴趣、能力等个性化信息，教育心理学家们致力于开发出能够根据每个学生的特点调整教学内容和方式的系统。 2. 心理健康与情绪管理：教育心理学不仅关注学生的认知发展，还关注他们的心理健康和情绪管理。研究如何帮助学生应对压力、焦虑和抑郁，以及如何培养积极的心态和健康的情绪调节能力。 3. 多元文化心理学：随着全球化的推进，教育心理学开始关注多元文化背景下的学习和教学问题。研究如何在多元文化环境中促进学生的社会适应、文化认同和跨文化交流。 4. 教育技术融合：教育心理学研究如何利用现代技术（如虚拟现实、增强现实、移动学习等…	教育心理学研究的新趋势主要体现在以下几个方面： 1. 个性化教育：随着技术的发展，教育心理学研究越来越注重个性化教育，即根据学生的个体差异以及学习风格和需求，量身定制教学内容和方式，以提高学习效果和学生的学习兴趣。 2. 积极心理学：积极心理学是近年来教育心理学研究的一个重要方向，强调培养学生的积极心态、自我激励和心理韧性，以帮助他们更好地面对挑战和困难，提高自我成就感和幸福感。 3. 数字化教育：随着信息技术的普及，教育心理学研究也逐渐关注数字化教育的影响，包括在线学习、电子教材、虚拟实验室等，在教学实践中运用科技手段提高学习效果和教学质量。 4. 跨学科研究：教育心理学研究越来越倾向于跨学科研究，与神经科学、认知心理学、发展心理学等学科进行交叉融合，以更全面地理解学习过程和教学效果。 总的来说，教育心理学研究的新趋势主要体现在个性化教育、积极心理学、数字化教育和跨学科研究等方面，旨在…	a	a	a
	简述儿童的同伴关系及其作用。	儿童的同伴关系是儿童在交往过程中建立和发展起来的一种儿童间特别是同龄人间的人际关系。儿童间的交往是促进儿童发展的有利因素，同伴关系有利于儿童社会价值的获得、社会能力的培养以及认知和健康人格的发展。首先，同伴可以满足儿童归属和爱的需要，以及尊重的需要。其次，同伴交往为儿童提供了学习他人反应的机会。再者，同伴还是儿童特殊的信息渠道和参照框架。此外，同伴还是儿童得到情感支持的一个来源。	儿童的同伴关系是儿童社会化过程中非常重要的一部分，它们在儿童的认知、情感和行为发展中扮演着关键的角色。同伴关系通常指的是儿童在同龄人中形成的非家庭成员之间的互动和关系。 在同伴关系中，儿童可以学习如何与他人合作、竞争和解决冲突。这些互动有助于儿童发展社交技能，如沟通、共情和协调行为。例如，儿童在玩游戏时需要协调行动，分享玩具时需要学会妥协，这些都是在同伴关系中学习到的。 同伴关系还促进了儿童的认知发展。通过与同龄人的互动，儿童可以学习新的知识和技能，比如语言、数学和科学概念。同伴之间的讨论和探索可以激发儿童的好奇心和创造力。 此外，同伴关系对于儿童的情感发展也至关重要。儿童在同伴关系中学习如何处理情绪，如快乐、悲伤、愤怒和羞耻。他们还学会如何建立和维护友谊，以及如何处理与朋友之间的冲突。 同伴关系的作用还体现在儿童的自我认知和自我概念上。通过与同龄人的互动，儿童可以了解自己在社会中的位置…	儿童的同伴关系是指他们与同龄或者类似年龄的其他孩子之间的互动关系。同伴关系在儿童的发展中扮演着非常重要的角色。首先，同伴关系可以促进儿童的社交技能的发展，帮助他们学会与他人相处、沟通和解决冲突。通过与同龄伙伴的互动，儿童可以学会分享、合作和互相支持，这些都是在日常生活中非常重要的技能。 其次，同伴关系也对儿童的心理健康和情绪发展起着重要作用。良好的同伴关系可以带来积极的情感体验和支持，增强儿童的自尊和自信心。同时，通过同伴关系，儿童还能够建立自己的身份认同和社会关系，帮助他们更好地适应社会环境。 总的来说，儿童的同伴关系对他们的发展有着深远影响，不仅有助于社交技能和情感发展，还可以促进他们的认知和学习能力的提升。 回答结束.	a	a	b
	双生子研究的特点。	双生子研究:概念。双生子研究有同卵双生和异卵双生两种研究同卵双生是由同一个受精卵分裂出来的，因此双生子基因相同;异卵双生子是由两个不同的受精卵发育而成的，相似度大约为50%。双生子研究是考察遗传与环境两因素对人的心理与行为影响大小和如何影响的一种重要方法。优点:研究同卵双生子有利于研究环境对人的发展的影响和作用。研究异卵双生子有利于研究遗传和基因对人的发展的影响和作用。缺点:取样范围较小，代表性不强研究较为片面，应将遗传和环境的影响结合起来研究。	双生子研究是一种非常有用的研究工具，它可以帮助科学家更好地理解遗传和环境因素如何影响人类行为和心理特征。这种研究的特点主要包括： 1. 遗传变异的自然实验：由于双生子共享相同的遗传基因，研究者可以通过比较同卵双生子（共享100%的遗传物质）和异卵双生子（共享大约50%的遗传物质）之间的差异来探究遗传因素对行为和心理特征的影响。 2. 环境因素的自然控制：尽管双生子在遗传上有所不同，但他们在环境因素上通常是非常相似的。这种相似性使得研究者能够更好地控制和分析环境因素对行为和心理特征的影响。 3. 时间序列研究：由于双生子出生和成长的时间序列是相同的，研究者可以通过观察双生子在不同时间点的发展变化来研究心理特征的发展过程。 4. 高效的样本大小：由于双生子研究通常只需要研究一对双生子即可获得两个样本，这使得这种研究相比于其他研究设计具有更高的效率。 5. 多学科的应用：双生子研究不仅限于心理…	双生子研究是一种重要的心理学研究方法，它利用双胞胎的遗传相似性和环境相似性来探究基因和环境对个体行为和特质的影响。双生子研究的特点包括： 1. 遗传相似性：同卵双生子的遗传相似性约为100%，而异卵双生子的遗传相似性约为50%，因此可以通过比较这两种类型的双生子来确定遗传对个体行为和特质的影响程度。 2. 环境相似性：同卵双生子通常在相同的家庭环境中长大，因此他们在成长过程中所受到的环境影响非常相似。通过比较同卵双生子和异卵双生子的行为和特质，可以确定环境对个体的影响。 3. 控制变量：双生子研究通常会控制其他可能影响结果的变量，例如性别、年龄、家庭背景等，以确保研究结果的可靠性和有效性。 通过双生子研究，我们可以更好地理解基因和环境对个体行为和特质的影响，为心理学领域的研究提供重要的参考和依据。 回答结束	a	a	a
	举例说明什么是纵向研究(Longitudinalstudy)。	纵向研究指的是在比较长的时间内，对一个儿童或一些儿童的心理发展进行有系统的定期研究，也叫做追踪研究。例如，研究儿童口头言语的发生发展，可以从新生儿发音起，经过一系列发展过程直到连贯性的言语为止，从而童口头言语发生发展的路线和规律。又如，有的研究者对同一被试，从新生儿起经过各个阶没直到青年时期为止，对他的心理发展的各个方面进行定期的追踪考查[如美国格塞尔(A.Gesell)的研究工作]。因此，纵向研究的时间有的比较短些，有的比较长有的甚至很长(可以是 20~30 年)。纵向研究的范围，可以是某一方面行为的发展也可以是整个行为的发展。纵向研究的优点是可以比较系统地、详尽地了解儿童心理发展的连续过程和量变质变的规律，这些特点正是儿童心理研究所要求的。但纵向研究也有其局限性:第一，样本的减少。随着研究时间的延续，部分被试可能因各种原因而失掉。第二，研究的时间较长，不易同时进行大量的研究;第三，长…	纵向研究（Longitudinal study）是一种研究方法，它涉及对同一组参与者在不同时间点进行多次观察或测量。这种研究设计允许研究者跟踪参与者的变化和发展，通常是为了探索因果关系或长期影响。 一个经典的例子是哈里特·肖默勒特（Harriet Stroh）在20世纪50年代进行的“蒙特利尔长期研究”（Montreal Longitudinal Study）。肖默勒特开始在1942年跟踪一群在蒙特利尔出生的儿童，最初的目的是研究他们的语言发展。随着时间的推移，研究扩展到了他们的认知发展、情感发展、社会技能以及最终的成年后生活。这个研究持续了超过70年，直到肖默勒特去世，提供了关于人类发展的宝贵见解。 纵向研究的优点在于它能够揭示长期趋势和模式，以及如何随着时间的推移影响个体的不同阶段。然而，这种研究也面临一些挑战，例如参与者可能会因为各种原因而退出研究，或者研究者可能会面临数据收集和分…	纵向研究是一种研究方法，通过对同一组或同一群体的被试者在一段时间内进行多次观察或测试，以了解他们在时间上的发展和变化。这种研究方法通常用于研究个体或群体在不同时间点的心理特征、行为变化、认知发展等方面的变化情况。 举例来说，一项关于幼儿发展的纵向研究可能会选择一组幼儿，从他们出生开始，每隔一段时间就对他们进行一次认知发展测试。通过这种方式，研究人员可以观察幼儿在不同年龄段的认知能力的发展情况，并了解他们的认知能力随着年龄增长而发生的变化。 回答结束	a	a	a
	简述学习动机的强化理论并分析这一理论在实践中发生的作用。	学习动机的强化理论斯金纳使用强化理论对学习本身的论述就是对学习动机的论述。个体的行为因受到强化而发生的概率增加就是动机增强，个体的行为因受到惩罚而发生的概率降低就是动机减弱。学习动机的强化理论的作用当个体缺失学习动机时，使用强化原理对学生的学习行为进行强化，可增强学生的学习动机。当个体具有强大的内在学习动机时，使用强化原理奖励学生的学习行为可能使学生的学习与强化物联系起来，会削弱学生的内在学习动机。	学习动机的强化理论是由心理学家B.F. Skinner提出的，属于行为主义心理学的范畴。根据这一理论，学习动机是由外部环境中的强化因素所引起的。强化可以是正面的，如奖励，也可以是负面的，如惩罚。这些强化因素会影响个体的行为表现，并通过时间的积累形成稳定的行为模式。 在实践中，强化理论被广泛应用于教育、工作场所和日常生活中。例如，在教育领域，教师可以通过给学生颁发奖状、提供额外的休息时间或是其他奖励来强化良好的学习行为。这种做法可以提高学生的学习动机，促使他们更积极地参与学习活动。 在工作场所，管理者可以通过奖励高效完成任务的员工来激励他们的工作动机。这种方法可以提高员工的工作效率和满意度。 在日常生活中，家长也可以通过给孩子适当的奖励来强化他们的好行为，如完成家庭作业后给予零食或额外的游戏时间。 总的来说，学习动机的强化理论通过外部的奖励或惩罚来影响个体的行为，能够在教育、工作和日常生活…	学习动机的强化理论是由行为主义心理学家斯金纳（B.F.Skinner）提出的，其核心观点是人类的行为是受到强化和惩罚的影响而产生的。强化是指一种刺激或事件，可以增强某种行为的出现频率，而惩罚则是一种刺激或事件，可以减弱某种行为的出现频率。根据强化理论，人们会通过获得积极的强化来增强他们的学习动机，从而更有可能达到学习目标。 在实践中，强化理论被广泛应用于教育领域。教师可以通过奖励学生的积极行为来增强他们的学习动机，例如表扬、奖励或其他形式的正反馈。这种正向强化能够促使学生更加努力地学习，提高他们的学习兴趣和参与度。相反，惩罚则很少被推荐使用，因为它可能会导致消极情绪和不良行为的出现，从而适得其反。 此外，强化理论也被广泛应用于工作场所及日常生活中。人们可以利用强化来激励自己去完成任务或实现目标，通过设定奖励机制来增强自己的动力。比如设定一个小目标，当完成时给自己一个奖励，这样可以帮助自己…	b	b	b
	小学儿童思维发展的基本特点。	小学时期，是儿童思维发展的一个重大转折时期。朱智贤指出，小学儿童思维的基本特点是由以具体形象思维为主要形式逐步过渡到以抽象逻辑思维为主要形式，但这种抽象逻辑思维在很大程度上，仍然是直接与感性经验相联系，仍具有很大成分的具体形象性。具体表现为:第一，在整个小学时期内，儿童的思维逐步过渡到以抽象逻辑思维为主要形式，但仍带有很大的具体性。第二，小学儿童的思维由具体形象思维到抽象逻辑思维的过渡，存在着一个明显的“关键年龄”。一般认为这一关键年龄在四年级(约 10~11岁)。这个思维发展的关键年龄有一定伸缩性，是可以变化的，可以提前或挪后，可以加快或延缓。第三，小学儿童逐渐具备了人类思维的完整结构，同时这个思维结构还有待进一步地完善。第四，小学儿童的思维在从具体形象思维向抽象逻辑思维发展的过程中，存在着不平衡性。对于不同的思维对象和内容、不同的学科和教材，儿童从具体形象思维向抽象逻辑思维过渡的速度…	小学儿童的思维发展是一个重要的阶段，这个阶段的孩子们正处于从儿童思维向成人思维过渡的过程中。以下是几个主要的思维发展特点： 1. **认知发展的快速增长**：随着年龄的增长，小学儿童的认知能力迅速发展，他们能够理解和使用更复杂的语言，解决更为复杂的问题。 2. **逻辑思维的发展**：随着年龄的增长，小学儿童开始能够进行逻辑推理。他们开始能够理解因果关系，并且能够根据逻辑来解释和预测事件。 3. **抽象思维的发展**：小学儿童开始能够理解抽象概念，比如时间、空间、数量等。他们能够理解这些概念与现实世界之间的关系。 4. **解决问题的能力**：随着思维的发展，小学儿童能够更有效地解决问题。他们开始能够使用策略来解决复杂的问题，并且能够从错误中学习。 5. **社会认知的发展**：小学儿童开始能够理解他人的观点和感受，这是社会认知发展的一个重要标志。他们开始能够进行合作和交流，理解团队合…	小学儿童思维发展的基本特点包括逻辑思维能力的初步形成、概念的建立与扩展、注意力的逐渐集中和记忆力的增强等。他们开始能够按照一定的逻辑顺序进行思考和解决问题，能够建立起一些基本的概念，并且在学习和生活中不断扩大和丰富自己的知识。同时，他们的注意力也逐渐能够集中在一个任务上，记忆力也在不断提升，能够更好地记住所学的知识和经验。 举例来说，小学生在解决问题时可能会运用简单的逻辑推理，比如“如果……那么……”的思维模式；在学习过程中，他们会逐渐建立起对于不同学科的基本概念，比如数学中的加减乘除、语文中的词语和句子等；在课堂上，他们能够更好地集中精力听讲和参与互动，同时也能够更好地记住老师所讲的知识。 回答结束.	a	a	a
	有意义学习的类型有哪些?	奥苏伯尔根据学习内容的复杂程度将学习分为三种，即表征学习、概念学习、命题学习。表征学习。表征学习是指学习单个符号或一组符号的意义，所以，又可以称为“名称学习”。表征学习的主要内容是词汇学习。概念学习。实质上是掌握同类事物的共同的关键特征。命题学习。命题是由句子来表述的。儿童命题学习的任务，是掌握句子表述的意义。当儿童进行有关意义学习句子时所学的句子与认知结构中的已有概念就建立起了联系。奥苏伯尔认为，儿童新学习的命题与他们已有的命题之间有三种关系:下位关系、上位关系和组合关系	有意义学习是指学习者在学习过程中能够发现学习内容与自己的兴趣、需求或现实生活中的问题之间的联系，从而产生积极的学习动机和兴趣。这种学习方式能够提高学习的效率和长期的记忆效果。有意义学习的类型主要包括： 1. 应用型学习：这种学习方式强调将所学知识应用到实际问题中去。例如，学生在学习数学时，可以通过解决实际生活中的问题来加深对数学概念的理解和应用能力。比如，通过计算购物时的折扣，或者规划家庭预算来应用数学知识。 2. 探究型学习：这种学习方式鼓励学生探索和发现事物之间的关系和规律。例如，学生在自然科学实验中通过观察、实验和分析来探究自然现象，进而形成自己的理论和结论。 3. 项目型学习：这种学习方式通过完成一个综合性项目来整合知识和技能。例如，学生可以参与一个社区服务项目，通过这个项目学习社会学、心理学、教育学等多个学科的知识，并将所学应用到实际中。 4. 自我反思型学习：这种学习方式强调…	有意义学习的类型有很多种，其中一种是情感联系学习。情感联系学习是指将学习的内容与个人的情感联系起来，使学习变得更加有意义和深刻。例如，如果一个人对某个主题或者领域有浓厚的兴趣或者情感投入，那么他在学习这个领域时就会更加投入和有动力，学习效果也会更好。 另外，社会联系学习也是一种有意义学习的类型。社会联系学习强调学习者与他人的互动和合作，通过与他人一起学习和交流，学习者可以更好地理解和应用知识，同时也可以建立起支持和鼓励的社会关系。 此外，自我联系学习也是一种有意义学习的类型。自我联系学习是指学习者通过将学习的内容与自己的目标、理念和信念联系起来，从而使学习变得更加有意义和深刻。通过将学习与自己的内在动机和目标联系起来，学习者可以更好地理解和应用知识，同时也可以提高自我效能感和成就感。 回答结束。	tie	tie	tie
	测量感觉阈限的三种基本方法是什么?说明它们的优缺点。	测量感觉闯限的基本方法有三种，它们是最小变化法、恒定刺激法和平均差误法。最小变化法的实验程序和计算过程都具体地说明了感觉阈限的含义，但它会因其递增和递减的刺激系列而产生习惯误差与期望误差。恒定刺激法的实验结果可以应用各种数学方法加以处理，因而便于与其他测定感受性的方法进行比较但在应用三类反应的实验程序时，被试的态度会对差别阈限值有较大影响。平均差误法的特点是求等值，它的实验程序容易引起被试的兴趣，但对不能连续变化的刺激不能用平均差误法来测其差别闽限。	测量感觉阈限的三种基本方法主要包括： 1. 方法一：上升阈限法（Ascending Threshold Method） 在上升阈限法中，刺激强度从低开始逐渐增加，直到被试者能够感知到刺激。这种方法的优点是操作简单，易于实施。缺点是可能会因为被试者的疲劳或注意力下降而影响结果准确性。 2. 方法二：下降阈限法（Descending Threshold Method） 下降阈限法与上升阈限法相反，刺激强度从高开始逐渐减少，直到被试者无法感知到刺激。这种方法的优点是可以减少被试者的疲劳感，因为从高强度开始减少刺激强度可能会让被试者感觉更舒适。缺点是可能会因为被试者对刺激强度的预期而影响结果。 3. 方法三：间隔阈限法（Interval Threshold Method） 间隔阈限法涉及在刺激出现和被试者感知到刺激之间测量时间间隔。这种方法的优点是可以提供关于感觉阈限变化的动态信息。缺点是需要精…	回答: 测量感觉阈限的三种基本方法分别是：绝对阈限法、差别阈限法和信号检测理论。 1. 绝对阈限法：通过测量被试在没有任何干扰条件下能够感知到某种刺激的最低强度。这种方法的优点是简单直观，可以直接获取被试对刺激的感知能力，但缺点是受到个体主观因素的影响，可能存在一定的误差。 2. 差别阈限法：通过测量被试在两种或多种刺激之间的最小可察觉差别。这种方法的优点是可以排除个体主观因素的影响，更客观准确地测量感知能力，但缺点是需要更复杂的实验设计和数据分析。 3. 信号检测理论：通过区分被试在判断两种刺激时所做的决策，从而测量感知能力。这种方法的优点是可以考虑到被试在判断过程中的信噪比，更全面地评估感知能力，但缺点是需要较高的实验技术和数据处理能力。 综合来看，不同的方法各有其优缺点，选择合适的方法取决于具体实验目的和研究问题。 回答结束.	tie	tie	tie
	简述产生式迁移理论的基本观点	产生式迁移理论是针对认知技能的迁移提出的，其基本思想是:前后两项学习任务产生迁移的原因是两项任务之间产生式的重叠，重叠越多，迁移量越大两项任务之间的迁移，是随其共有的产生式的多少而变化的。所谓产生式就是有关条件和行动的规则，简称 C-A规则。产生式迁移理论是根据安德森的思维适应性控制理论(简称 ACT)发展而来的。根据 ACT 理论，技能的学习分两个阶段:首先规则以陈述性知识的形式进入学习者的命题网络，然后经过变式练习转化为以产生式表征的程序性知识。当两项任务之间有共同的产生式或产生式的重叠时，迁移就会发生。也就是说，产生式的相似是迁移产生的条件。安德森等设计了大量实验来验证他的迁移理论，但目前该理论的研究仍停留于计算机模拟阶段。尽管如此，它在实际教学中的含义还是十分明显。因两项任务共有的产生式数量决定迁移水平，因此要注重基本概念原理和规则的教学，以便为后继的学习做准备。此外，先前学习的…	产生式迁移理论（Production System Transfer Theory）是由心理学家David A. Evans和他的同事们在1980年代提出的。该理论主要关注于知识和技能的迁移，即人们如何将在一个任务或环境中学习的知识和技能应用到另一个任务或环境中。 该理论的基本观点可以概括为以下几个方面： 1. 知识表示：产生式迁移理论认为，知识是以规则的形式存储在心理中的，这些规则被称为“产生式”（productions）。每个产生式包含一个条件部分和一个动作部分。当条件部分与当前的环境状态匹配时，产生式就会被激活，执行动作部分的操作。 2. 知识的抽象性：理论认为，有效的知识迁移需要知识具有足够的抽象性。抽象的知识能够在不同的环境和任务中找到应用，而具体的知识则可能仅在特定环境下有效。 3. 类型匹配：产生式迁移理论强调了类型匹配的重要性。类型匹配指的是在迁移知识时，目标环境的类型与…	产生式迁移理论是指个体在学习新知识、技能或任务时，会借助已有的知识、技能或任务经验，将其迁移应用到新的学习任务中。基本观点包括： 1. 迁移的类型：根据迁移的内容，可以分为正向迁移和负向迁移。正向迁移是指旧任务对新任务有促进作用，而负向迁移则是指旧任务对新任务有干扰作用。 2. 迁移的条件：迁移的发生受到很多因素的影响，包括任务的相似性、任务的认知结构、任务的练习程度等。例如，如果两个任务在认知结构上有相似之处，迁移效果可能会更好。 3. 迁移的机制：迁移效果可能是由于共享的认知结构或者策略导致的。通过将旧任务的知识、技能或策略应用到新任务中，可以提高学习效果。 举例来说，一个人学会了弹吉他的技能，然后尝试学习弹钢琴，由于两个乐器在音乐理论、手指协调等方面有共通之处，这个人可能会更容易学会弹钢琴，这就是正向迁移的例子。 回答结束	b	b	b
	简述意志行动中的冲突种类。	人的意志行动通常表现为接近回避某一目标。根据意志行动的这一特点可以把冲突分为以下四种类型:双趋冲突:两种对个体都具吸引力的需要目标同时出现，i而由于条件限制，个体无法同时采取两种行动所表现出的动机冲突。双避冲突:指个体回避一个威胁性目标的同时，又面临另一个威胁性目标的出现。而他们又只能回避其中一种目标时，就产生回避--回避型冲突，也就是双避冲突。趋避冲突:指个体的动机为满足某一需求指向一个目标的同时又受威胁而需要回避。多重趋避冲突:在实际生活中，人们的接近回避型冲突，常常出现一种更复杂的形式，即人们面对着两个或两个以上的目标，而每个目标又分别具有吸引和排斥两方面的作用。人们无法简单地选择一个目标，而回避或拒绝另一个目标，必须进行多重的选择。进退维谷指的是进退两难的情况，是双避冲突。趋避冲突只有一个目标，其他三种冲突都有两种或两种以上的目标，	意志行动中的冲突通常涉及到个体内在的矛盾和外部环境的阻力。这些冲突可以分为以下几种类型： 1. 内在冲突：这类冲突源于个体内心的不同动机、价值观和目标之间的竞争。例如，一个人的长期目标可能是减肥，但短期的欲望可能是享受高热量的美食，这就导致了内在冲突。 2. 外在冲突：这类冲突来自于外部环境的压力和阻碍。比如，一个学生可能希望在学业上取得好成绩，但面对诱惑性的社交活动和娱乐方式，这些外部因素可能会妨碍其学习目标的实现。 3. 自我控制冲突：这涉及到个体在自我控制方面的挑战，特别是在面对诱惑和冲动时。例如，一个吸烟者可能在尝试戒烟的过程中经常面临来自烟草的诱惑，这是一种典型的自我控制冲突。 4. 价值冲突：这类冲突发生在个体的不同价值观和信念之间的冲突。例如，一个医生可能在职业道德和个人利益之间产生冲突，特别是在面对医疗伦理问题时。 5. 行为冲突：这涉及到个体在不同行为选择之间的选择困难…	意志行动中的冲突种类可以分为内部冲突和外部冲突两种。内部冲突是指个体内部不同欲望或目标之间的矛盾，例如想要减肥但又很想吃甜食，这种内部矛盾导致了意志行动的冲突。外部冲突则是指外部环境和个体目标之间的矛盾，例如工作中的时间紧迫和个人生活需求的矛盾，这种情况下个体也会面临意志行动的冲突。 举例来说，一个学生既想要追求学业上的成功，又想要享受社交生活，但时间有限，这就是内部冲突。而一个上班族既想要升职加薪，又想要陪伴家人，但工作要求较高，这就是外部冲突。 总的来说，意志行动中的冲突种类多种多样，需要个体根据具体情况进行分析和解决。 回答结束	tie	tie	tie
	简述托马斯-切斯的气质三类型。	托马斯-切斯的气质三类型说把婴儿的气质类型划分为以下三种类型:容易型。这类婴儿的吃、喝、睡等生理机能活动有规律，节奏明显，容易适应新环境，也容易接受新事物和不熟悉的人;这类婴儿情绪一般积极愉快、爱玩，对成人的交往性行为反应积极。困难型。这类婴儿的突出特点是，时常大声哭闹烦躁易怒，爱发脾气，不易安抚;在饮食、睡眠等生理机能活动方面缺乏规律性;对新事物、新食物、新环境适应很慢。迟缓型。这类婴儿的活动水平很低，行为反应强度很弱，情绪表现总是消极，不愉快，但不像困难儿童那样大哭大闹，而是常常很安静，退缩，情绪低落;逃避新事物、新刺激，对外界环境和事物的变化适应较慢;但在没有压力的情况下，他们也会对新刺激缓慢地发生兴趣，在新环境中能逐渐地活跃起来。	托马斯-切斯的气质理论是由美国心理学家斯坦利·托马斯和弗雷德里克·切斯在1960年代提出的。他们认为气质是由个体在不同情境下的行为反应模式所体现的，这种模式是由遗传因素决定的。根据他们的理论，气质可以分为三大类：神经质、体质和情绪质。 1. 神经质：这种气质的人倾向于对压力和紧张情绪反应敏感。他们可能会经历焦虑、紧张和抑郁等情绪。神经质的人通常对新环境和不确定性感到不安，他们可能会表现出过度的担忧和对细节的过分关注。例如，如果一个神经质的人面对一个新的工作环境，他们可能会因为担心无法适应而感到焦虑。 2. 体质：体质气质的人通常对压力和紧张情绪反应较为稳定。他们可能会表现出对挑战的积极反应，喜欢冒险，并且在面对困难时表现出较强的韧性。体质气质的人往往对运动和户外活动感兴趣，他们可能会在压力下变得更加专注和有活力。 3. 情绪质：情绪质气质的人在情绪表达上较为稳定。他们通常对周围环境的变化…	托马斯-切斯将气质分为三种类型：易怒型、冷漠型和焦虑型。 易怒型是指那些易于激动、情绪不稳定、容易发脾气的人。他们对外界刺激的反应较强烈，往往会因为一点小事而失去控制，表现出暴躁和易怒的特点。 冷漠型的人则相对冷淡、冷漠、缺乏情感表达，他们往往不容易被激动，对外界的刺激反应较为淡漠。他们可能在面对情绪化的情况时显得无动于衷，不容易表露自己的情感。 焦虑型则是指那些经常感到焦虑、担忧、紧张的人。他们对未来充满担忧，往往会过分担心各种可能发生的事情，导致情绪波动较大。 以上是托马斯-切斯的气质三类型的简要描述。 回答结束	tie	tie	tie
	评述早期传统的游戏理论(经典的游戏理论)。	从 19 世纪下半叶到 20 世纪 30 年代左右，是儿童游戏研究的初始阶段在这一阶段出现了最早的一批游戏理论，这些理论今天被称作经典的游戏理论霍尔的复演说。游戏是远古时代人类祖先的生活特征在儿童身上的重演。如捕鱼、爬树、搭房子等。儿童游戏的发展阶段遵循了人类进化的顺序。不同年龄的儿童重演祖先不同形式的本能活动，重演史前的人类祖先到现代人进化的各个发展阶段。席勒一斯宾塞的“精力过剩说”。游戏是出于机体内剩余的精力需要发泄而产生的。机体保护自己生存的精力除了维持正常的生活外，还有剩余。过剩的精力必须寻找方法消耗它，而游戏是剩余精力加以释放的最好的形式。彪勒的“机能快乐说”。游戏是儿童从行动中获得机体愉快的手段。拉扎鲁斯一帕特瑞克的“娱乐放松说”。主要观点是:游戏不是为了排遣和消耗剩余精力，而是为了缓解疲劳，恢复精力。人在工作和劳动中消耗了脑力和体力，产生紧张和疲劳感，要解除它们就需要暂时离…	早期传统的游戏理论，通常被称为经典的游戏理论（Classical Game Theory），起源于20世纪初期，尤其是在经济学领域。它主要由约翰·纳什（John Nash）和奥斯卡·摩根斯特恩（Oskar Morgenstern）在他们的著作《游戏理论》（Theory of Games and Economic Behavior）中奠定了基础。经典的游戏理论主要关注的是两个人或多个人之间的互动行为，以及这些行为如何受到策略选择的影响。 经典的游戏理论的一个核心概念是纳什均衡（Nash Equilibrium），它描述了在一个多人游戏中，参与者采取的策略组合，使得没有参与者单独改变策略而不受其他参与者策略改变影响的可能性。换句话说，纳什均衡是当所有参与者都采取最优反应时的状态。 一个经典的例子是囚徒困境（Prisoner's Dilemma），其中两个囚徒面临着合作或背叛的选择。尽管合作策…	早期传统的游戏理论，也被称为经典的游戏理论，主要由数学家冯·诺依曼和经济学家莫根斯特恩提出。这一理论认为，游戏是一种冲突的情境，在游戏中的参与者通过不断地做出决策来追求自身的利益。经典的游戏理论主要关注于零和博弈，即一方的利益就是另一方的损失，参与者之间的利益是完全对立的。 在经典的游戏理论中，最著名的概念就是纳什均衡。纳什均衡是指在博弈中每个参与者都做出了最佳的决策，没有人可以通过改变自己的策略来获得更好的结果。这个概念在博弈论和经济学中有着广泛的应用，被认为是参与者之间理性决策的结果。 然而，经典的游戏理论也有其局限性，例如它假设参与者都是理性的、完全信息和目标明确的，而实际情况下人们的行为可能受到情绪、不确定性等因素的影响。因此，随着心理学和行为经济学的发展，越来越多的研究开始考虑到参与者的心理因素，对传统的游戏理论进行了扩展和修正。 回答结束	tie	tie	tie
	简述儿童社会性认知的发展趋势。	社会性认知是指对自己和他人的观点、情绪、思、动机的认知，以及对社会关系和集体组织间关系的认知，与认知能力的发展相适应，社会性认知在容上涉及三个不同的层次:一是关于个人的认知，包括对自己和别人各种心理活动及思想观点、个性品质的认知;二是关于人与人之间的各种双边关系的认知，如对权威、友谊、冲突、合作等关系的认知;三是关于社团内部及社团之间各种社会关系的认知。儿童的社会性认知发展具有如下的趋势:第一，从表面到内部，即从对外部特征的注意到更深刻的品质特征的注意;第二，从简单到复杂，从问题的某个方面到多方面、多维度地看待问题;第三，从呆板到灵活的思维:第四，从对个人即时事件的关心到关心他人的长远利益;第五，从具体思维到抽象思维;第六，从弥散性的、间断性的想法到系统的、有组织的综合性的思想。	儿童社会性认知的发展是指儿童从出生开始，逐渐学会理解和参与社会互动的过程。这个过程可以分为几个阶段： 1. 婴儿期（0-1岁）：在这个阶段，婴儿开始学习区分亲人和陌生人，能够通过声音、面部表情和身体语言来识别和回应。他们开始理解简单的社会互动，如模仿成人行为和寻求关注。 2. 幼儿期（1-3岁）：在这个阶段，儿童开始发展基本的社会认知，如理解“我”和“你”的区别，开始表现出对他人的同情和模仿成人行为的能力。他们也开始学习简单的规则，如分享和轮流。 3. 学龄前期（3-5岁）：在这个阶段，儿童的社会认知能力显著提高，他们开始理解更复杂的社会规则，如合作和竞争。他们也开始表现出对他人情绪的理解和同情。 4. 学龄期（6岁及以上）：在这个阶段，儿童的社会认知能力进一步发展，他们能够理解更复杂的社会关系，如朋友和敌人之间的区别。他们开始发展自己的社会角色，如成为一个好朋友或团队成员。 总的来说，…	儿童社会性认知的发展趋势可以分为不同的阶段。在早期阶段，儿童主要关注自己的需求和欲望，难以理解他人的感受和想法。随着年龄的增长，他们开始逐渐学会推断他人的内心状态，理解他人的情感和意图，以及逐渐发展出共情能力。在学龄期，儿童开始建立起更加复杂的社会认知，包括理解他人的角色和社会规范，以及学会解决冲突和合作等社会技能。到了青少年期，他们开始更加深入地思考社会关系和道德问题，建立起自己的价值观和道德观念。 举例来说，一项研究发现，3-6岁的儿童在进行一项任务时，如果看到其他人需要帮助，他们会更愿意提供帮助，显示出了早期的共情能力。而在青少年期，他们可能会更加关注社会正义和公平，开始对社会问题和道德问题有更深入的思考。 总的来说，儿童社会性认知的发展趋势是从自我中心到他人中心，从简单到复杂，从个体到社会。通过社会交往和经验的积累，他们逐渐建立起更加丰富和成熟的社会认知能力。 回答结束	b	b	a
	对话言语指的是什么?它有哪些特点?	定义。对话言语是指两个或几个人直接交流时的言语活动。对话言语是通过相互谈话、插话的形式进行的。一般认为，对话言语是一种最基本的言语形式，其他形式的口语和书面言语都是在对话言语的基础上发展起来的。对话言语的特点:对话言语是一种情境性言语。它与交谈双方当时所处的环境有密切联系，因而是“前后呼应”的。对话言语是一种简略的言语。在对话言语中，说话的双方往往只用简单的句子甚全个别单词来表达白己的思想。对话言语是对话双方的直接交流。对话言语是由对话双方互相支持的言语。参加对话的人既是听众，又是说话者。对话言语常常是一种反应性言语。由于对话言语多数是由某种具体情境直接引起的，因而一般缺乏计划性，而且交谈的双方需要随时根据对方的谈话来调整自己的谈话，需要考虑谈话时的具体情境，不可能完全按预定计划进行，因而也是反应性的。	对话言语是指在社交互动中使用的言语形式，它主要用于沟通和交流信息。对话言语的特点包括： 1. 互动性：对话言语是双向的，参与者通过言语来响应对方的信息，并根据对方的反应调整自己的言语内容。 2. 语境依赖性：对话言语的意义往往取决于特定的社交场合、文化背景、时间和地点等语境因素。 3. 非正式性：与正式的书面语言相比，对话言语通常更加随意和非正式，包含更多的口语习惯和非语言信息。 4. 语用功能多样性：对话言语可以用于多种语用功能，如传达信息、表达情感、维持关系、进行修辞等。 5. 语言灵活性：在对话中，人们可以灵活地使用语言，进行修饰、重复、提问、反驳等，以达到沟通的目的。 举例来说，在日常对话中，人们可能会使用不同的言语策略来维持对话的流畅性和和谐性。例如，使用笑话或幽默来缓和紧张的气氛，或者使用反问来表达不满。	回答: 对话言语是指人们在交流中使用的语言方式，是人际交往中最基本的沟通形式之一。对话言语有以下几个特点： 1. 相互性：对话言语是双向的，需要有至少两个人参与，彼此之间可以互相交流、回应和理解对方的意思。 2. 即时性：对话言语是实时进行的，参与者需要在同一时间段内进行言语交流，可以立即做出回应和反馈。 3. 交互性：对话言语是互动性强的，参与者可以不断地进行回应和补充，以实现更深入的沟通。 4. 动态性：对话言语是动态变化的，参与者可以根据对方的回应和情境的变化进行调整和改变自己的言辞。 举例来说，两个朋友在聊天时进行的对话就是对话言语，他们可以互相交流、回应彼此的观点，并通过言语交流来增进彼此的了解和友谊。 回答结束。	a	a	a
	什么是部分报告法?	斯伯林用部分报告法研究感觉记忆的容量，实验程序是将全部刺激项目排成 3x4矩阵，刺激以 50ms 的时程呈现刺激，在刺激消失的同时，某一信号随即出现，被试根据约定信号的种类报告相应的刺激项目，研究者根据被试报告的准确率计算其记忆量。部分报告法运用了随机原理，使报告分段进行，有效地控制了报告时潇引起的误差，	部分报告法（Partial Reporting）是一种心理学实验设计方法，主要用于研究记忆和认知过程。这种方法涉及到让参与者报告他们在某个任务或实验中所记得的部分信息，而不是要求他们完整地回忆所有的细节。通过这种方式，研究者可以了解人们在记忆过程中选择性地保留和报告信息的倾向。 例如，在一个记忆实验中，参与者可能被要求观看一系列的图片，然后在记忆测试中报告他们能记得的图片内容。研究者可能特别关注参与者报告的图片内容是否与他们在实验开始时设定的某些特定条件相匹配，这有助于研究记忆偏差和选择性记忆的现象。 部分报告法在研究记忆偏差、认知干扰、以及信息加工策略等方面非常有用。通过分析参与者报告的信息，研究者可以揭示人们在记忆过程中如何选择性地处理和保留信息。	部分报告法是一种心理学实验中常用的方法，用于研究注意力和感知的过程。在这种方法中，实验参与者被要求在一系列刺激中只报告其中的一部分，而不是全部。通过这种方式，研究者可以了解不同条件下参与者对信息的处理方式，例如他们如何选择性地关注某些刺激而忽略其他刺激。 举例来说，实验中可能包含了一系列不同颜色的字母，参与者被要求只报告其中红色的字母。通过比较参与者对红色字母的反应时间和准确性，研究者可以推断出在注意力受限条件下，参与者是如何选择性地处理信息的。 总的来说，部分报告法可以帮助研究者更深入地了解人类的感知和注意力机制，以及人们在面对复杂信息时是如何进行决策和处理的。 回答结束。	tie	tie	tie
	简述什么是团体相倚管理?它最主要的优点是什么?	团体相倚管理。在课堂管理中，把强化物与学生团体的行为表现联系起来，针对学生团体的行为表现来决定是否实施强化物，这种特殊的行为矫正技术即为团体相倚管理。优点。其优点在于:易于实施。由于课堂上所有学生的行为很难完全一致，因此，如果针对每个学生的行为表现，分别对其实施强化程序，则会非常麻烦和不方便。有利于矫正来自同伴支持的问题行为。这种管理方法有助于团体成员之间互相鼓励，向着共同的目标去努力。	团体相倾管理是一种组织管理方法，它鼓励团队成员之间相互依赖、相互支持和相互帮助，以达到共同目标。这种管理方式强调团队合作和成员间的良好关系，认为团队成员的个人成长和组织的整体发展是相辅相成的。 团体相倾管理的最主要优点之一是能够提高团队的凝聚力和效率。当团队成员之间建立起相互信任和支持的关系时，他们更愿意分享信息、资源和责任，这有助于解决问题、创新和决策。例如，在一个团体相倾管理的团队中，如果一个成员遇到困难，其他成员会积极提供帮助，而不是单独应对，这种互助的氛围可以极大地提高团队的整体表现。 此外，团体相倾管理还能够促进员工的满意度和参与度。员工在团队中得到认可和支持时，更有可能感到满足和归属感，从而提高工作动力和生产力。这种管理方式还能够帮助组织更好地适应变化，因为团队成员之间的相互依赖和协作能够增强组织的灵活性和适应性。	团体相倚管理是指团体成员之间在相互支持和依赖的基础上，共同努力达成共同目标的管理方式。团体相依管理能够增强团队成员之间的凝聚力和团队合作意识，提升团队整体的执行力和绩效水平。团体成员之间相互之间的支持和依赖，可以促使他们更好地协作，共同面对挑战和困难，从而实现更好的团队绩效。 团体相依管理的主要优点包括： 1. 提高团队凝聚力：团队成员之间相互支持和依赖，有助于增强团队的凝聚力，促使团队成员更加团结，共同面对挑战。 2. 提升团队绩效：团队成员在相互支持和依赖的基础上，更容易形成团队合作意识，共同努力实现团队的共同目标，从而提升团队的绩效水平。 3. 增强团队执行力：团队成员在团体相依管理下，更容易形成统一的行动方向，能够更好地协作配合，提升团队的执行力和效率。 总的来说，团体相依管理能够促进团队成员之间的合作和协作，提升团队整体的绩效水平，是一种有效的团队管理方式。 回答结束。	tie	tie	tie
	说明实验室实验法和自然实验法各有什么优点。	实验法是在控制的情境下，研究者系统地操纵自变量，使之系统地改变然后观察因变量随之改变的情况的方法。实验室实验是借助专门的实验设备，在对实验条件进行严格控制的情况下实施的。自然实验法中的实验操作并未由实验者处理，而是生活中自然状态下发生的处理，假设这些处理是由实验者完成的。自然实验条件下，由于被试始终处于自然状态中，不会产生很强的紧张心理，因此，得到的资料比较切合实际。实验室实验由于时实验条件进行严格的控制并借助于专门的实验设备，可以获得较精确的研究成果，有助于发现事件的因果关系，并可以对实验结果进行反复验证，	实验室实验法和自然实验法是心理学研究中常用的两种方法，它们各有其独特的优点。 实验室实验法的优点主要体现在以下几个方面： 1. 控制性强：实验室实验法允许研究者在一个高度控制的环境中操纵变量，从而能够确保因果关系的清晰性。通过控制其他可能影响结果的因素，研究者可以更准确地探索变量之间的关系。 2. 精确性高：实验室实验法可以提供高度精确的数据收集和分析，研究者可以使用标准化的测试和评估工具来收集数据，减少主观性。 3. 快速性：实验室实验法通常能够快速地进行数据收集和分析，相比于自然实验法，研究周期较短。 4. 易于复制：由于实验室实验法的控制性强，其他研究者可以轻易地复制实验，验证研究结果的可靠性。 然而，实验室实验法也有其局限性，例如可能缺乏外部有效性，即实验结果可能无法在真实世界中得到复现。 自然实验法的优点主要体现在以下几个方面： 1. 外部有效性：自然实验法在真实世界环境中进行…	实验室实验法和自然实验法是心理学研究中常用的两种方法。实验室实验法是在受控的环境中进行实验，研究者可以控制实验条件，确保实验结果的准确性和可靠性。这种方法能够排除外部干扰因素，使研究结果更具说服力。另一方面，自然实验法是在真实的环境中进行研究，更接近真实生活情境，因此可以更好地反映人们的真实行为和心理过程。自然实验法更具有外部效度，能够更好地推广到现实生活中。 举例来说，通过实验室实验法可以研究人们在受到不同条件下的反应时间，从而揭示认知过程中的规律。而通过自然实验法可以观察人们在日常生活中的行为，比如研究社交媒体对人们情绪的影响。 因此，实验室实验法和自然实验法各有其优点，研究者可以根据研究目的和问题的特点选择合适的方法来进行研究。 回答结束.	b	b	b
	简述动机的本能论。	动机的本能理论詹姆斯提出人的行为依赖于本能的指引，人除了具有动物一样的生物本能外，还具有社会本能。本能论最著名的鼓吹者是美国心理学家麦独孤，他系统地提出了动机的本能理论，认为人类所有行为都是以本能为基础的，不能是人类，切思想和行为的基木源泉和动力。木能具有能量、行为和目标指向三个成分;个人和民族的性格与意志也是由本能逐渐发展而形成的。弗洛伊德的精神分析理论也是建立在本能论的基础上的，认为人的心理活动的原动力是由人类生来具有的本能驱力决定的，这种本能驱力使人类产生一种紧张状态，驱使人采取行动并通过消除紧张感来获得满足。人类最基本的本能是生的本能与死亡本能，它们是人类行为的两种基本动力。此外，20世纪50年代欧洲一批习性学家再度爆发出对本能论的研究热情。他们主要探讨控制本能行为的重要因素，如感觉输入机制、特定刺激、学习的作用和中枢机制等，企图揭示动物行为的生理因素与环境因素的关杀	动机的本能论是由心理学家Sigmund Freud提出的一种理论，认为人类行为受到本能的驱动。根据这一理论，人类内在的本能是由性和死亡本能组成的。性本能（libido）是指寻求性满足的冲动，而死亡本能则是指对生命的消极态度和对死亡的恐惧。 Freud认为，性本能在个体的发展过程中起着至关重要的作用，尤其是在儿童和青少年时期。性本能的发展会导致个体形成各种心理结构，如欲望、焦虑和防御机制。死亡本能则与个体对生命的消极态度和对死亡的恐惧有关，这种恐惧可能导致个体形成各种防御机制来避免面对死亡的现实。 在动机的本能论中，个体的行为被视为是本能冲动的满足过程。例如，一个人的工作动机可能是为了满足他们的性本能，通过在工作中获得成就感和认可来满足他们的自尊和自我价值感。同样，一个人的社交行为可能是为了满足他们的社交本能，通过与他人互动来满足他们的需要感和归属感。 总的来说，动机的本能论认为人类行为是…	动机的本能论是由美国心理学家亚伯拉罕·马斯洛提出的，他认为人类的行为受到内在的本能驱动，主要包括生理需要（比如食物、水和睡眠）和心理需要（比如安全感、社交需要和自尊需求）两大类。根据本能论，人们的行为是为了满足这些需要而产生的，当某种需要得不到满足时，就会产生动机驱使人们采取行动来满足这种需要。例如，当人们感到饥饿时，就会产生食物的需求，从而产生吃饭的动机。 回答结束	a	tie	a
	根据感觉相互作用的现象，说明为什么重感冒患者往往会感到食而无味。	感觉相互作用是指在一定条件下，各种不同的感觉都可能发生相互作用从而使感受性发生变化的现象。由于人接受环境的信息常常是多通道同时进行，因此不同感觉的相互作用时常发生。例如，微光刺激可提高听觉的感受性，而强光刺激则会降低听觉的感受性。感觉相互作用的一般规律是弱刺激能提高另一种感觉的感受性，强刺激则会使另一种感觉的感受性降低。味觉和嗅觉的相互作用是尤其明显的。在生活中，品尝美味佳看需要嗅觉、味觉器官的共同作用，我们才能真正得到一种享受。比如闭上眼睛，捏住子，我们将分不清里吃的是苹果，还是土豆感冒的人常常味觉不敏感，当你伤风感冒。鼻子不通气时，由于缺少嗅觉的相互作用，单单依靠舌头来品尝时，再好吃的东西也会形同嚼蜡，大为逊色。因而重感冒的人会食而无味。	感觉相互作用（也称为感觉交互作用或感觉补偿）是指当一个感觉通道受到损害时，其他感觉通道会变得更加敏感，以补偿损失的感觉。这种现象在重感冒患者中尤为常见，因为感冒会影响身体的多个系统，包括神经系统和消化系统。 在重感冒患者中，食欲往往会减退，这可能是因为身体在应对病毒感染时，会分配更多的资源来支持免疫系统，而减少对消化系统的支持。同时，感冒可能会导致鼻窦炎、咽喉痛等症状，这些症状会分散患者的注意力，使得他们对食物的味道不那么敏感。 此外，感冒时的鼻塞和流鼻涕也会影响味觉。味觉是通过鼻腔和口腔的黏膜感受器来传递的，而鼻腔的感受器对于甜、酸、咸、苦和辣五种基本味道的检测尤为重要。当鼻腔受阻时，味觉的传递会受到影响，导致食物的味道变得不那么鲜明。 总之，重感冒患者感到食而无味的现象可能是由于身体资源的重新分配、消化系统的影响以及味觉传递受阻等因素的综合作用。	回答: 重感冒患者往往会感到食而无味可能是因为他们的嗅觉和味觉受到影响。感冒病毒会导致鼻塞和鼻腔黏膜肿胀，这会影响嗅觉的正常功能。因为味觉和嗅觉是相互作用的，所以当嗅觉受到影响时，味觉也会受到影响，导致食物的味道变得较为模糊或无味。此外，重感冒患者可能还会有食欲不振的症状，这也会影响他们对食物的感知和享受。 举例来说，有研究表明，如果一个人的嗅觉被故意阻断，他们对食物的味道会变得更加淡然，甚至有些食物会变得难以下咽。因此，重感冒患者感到食而无味可能是因为他们的嗅觉和味觉受到了影响，使得他们无法像平时那样享受食物的味道。 回答结束	a	b	a
	独白言语指的是什么?它有哪些特点?	定义。独白言语是个人独白进行的，与叙述思想、情感相联系的较长而连贯的言语。它表现为报告、讲演、讲课等形式。独白言语的特点:独白言语是说话者独白进行的言语活动，独白言语的支持物是自己谈话的主题和自己所吐露的词句，因而不同丁对话言语。独白言语也受听众的支持，但这种支持主要米自听众的表情和环境的气氛。独口言语是一种开展的言语。为了系统、准确地表达白己的思想，独白言语具有开展的形式。独白言语是连贯的、论证性的，在用词造句方面要求严谨、符合语法。独白语言对语流的速度和发声也有要求。为了使听众正确地了解自己谈话的内容，说话者要注意语流恰当、发音清晰、语调具有变化，有时还要配合恰当的表情和手势，这样才能吸引听众。独白言语是有准备有计划进行的言语活动。由于独白言语对言语本身的质量有较高的要求，言语过程中又较少受到交谈情景提供的非言语信息的影响，因此，事先的准备计划对运用这种言语形式具有重要的意义。	独白言语是一种在心理学中被称作“自我对话”的行为，它是人们在没有外界干扰的情况下，内心对话的过程。这种言语通常是低声的，甚至可能是无声的，且不一定伴随着肢体语言的表现。独白言语可以帮助人们组织思维、记忆信息、解决问题、情绪调节等。 独白言语的特点主要包括： 1. 内心的对话：独白言语发生在个体内心，是一种私密的言语行为，不涉及到与他人的直接交流。 2. 自我指导：独白言语通常是自我指导性的，人们通过内心的对话来引导自己的行为和决策。 3. 无声或低声：独白言语往往是无声的，或者是非常低声的，目的是避免被他人听到，以保持私密性。 4. 自然流露：独白言语可能在人们不自觉中发生，尤其是在进行复杂任务或需要集中注意力时。 5. 情绪表达：独白言语也可以是情绪的表达形式，人们在内心对话中可能会表达自己的感受和情绪。 6. 自我反馈：独白言语有助于个体进行自我反馈，通过内心的对话来检验自己的想法和…	回答: 独白言语是指一个人在没有其他人干扰或干预的情况下，自发地对自己进行思考和表达的过程。独白言语的特点包括：1. 它是一种内在的心理过程，不需要外部的刺激或引导；2. 它是一种自我对话的形式，个体在脑海中通过自我言语来整理思维、解决问题或者表达情感；3. 它有助于个体更好地理解自己的情感和行为，促进自我认知和自我反思的能力。举例来说，一个人在做重要决策时，可能会通过独白言语来整理思维，分析利弊，最终做出最合适的选择。回答结束。	tie	tie	tie
