# Supplementary material
Source: ML conference proceedings conference paper supplement (https://openreview.net/forum?id=R7pR4dzgAV)
Supplement: supplementary_material [file psyen_mismatches.xlsx]

## Sheet: Sheet1
id	reference	model_answer_a	model_answer_b
2	4）实验结论∶遗忘在学习之后立即开始，保持和遗忘都是时间的函数。遗忘进程是不均衡的，表现为先快后慢，以后逐渐平缓。	艾宾浩斯的遗忘曲线研究是心理学领域的一个经典实验，它揭示了记忆的持久性随时间的变化规律。通过自己作为被试，艾宾浩斯使用了机械重复的记忆方法来学习一系列单词，并记录了随时间的不同间隔重复学习这些单词时的遗忘率。 实验的结论是，遗忘并不是随机发生的，而是遵循了一定的规律。艾宾浩斯发现，遗忘率在学习初期较高，随着时间的推移，遗忘率会逐渐下降，但随后会出现遗忘曲线的复苏现象，即遗忘率会再次上升。这种曲线形状被称为艾宾浩斯遗忘曲线。 具体来说，艾宾浩斯发现，最初的遗忘曲线呈现出一种指数型下降，随着时间的推移，遗忘率逐渐减少。然而，当经过一定的时间间隔（通常是7天或更长时间）后，遗忘曲线会出现复苏，遗忘率会再次上升。这表明，间隔重复学习能够有效地减少遗忘，并且这种效果会随着时间的推移而变得更加显著。 艾宾浩斯的研究揭示了记忆的持久性与复习之间的关系，为后续的记忆和学习理论提供了重要的基础。	实验的结论是，遗忘的速度并非一成不变，而是在学习之后的一段时间内遵循特定的规律。艾宾浩斯发现，刚学习完的信息在接下来的20分钟内遗忘最快，之后遗忘速度逐渐减缓。在学习后的第一天，遗忘速度也比较快，之后逐渐减缓，但是在学习后的第二天开始，遗忘速度又会加快。这种遗忘曲线被称为艾宾浩斯遗忘曲线，对于记忆的保持和巩固具有重要的启示意义。 回答结束.
4	心理测验是根据一定的法则和心理学原理，使用一定的操作程序给人的认知、行为、情感的心理活动予以量化。心理测验编制的基本过程∶①确定测验目的，明确对象、测量目标和测量用途。明确测量对象就是以年龄、性别、职业等人口学特征确定要测量的个人和团体。明确测量目标就是确定测量何种心理特质。明确测量的用途就是明确测量的功能，如描述被试的心理特质、诊断心理状况等。②拟定编制计划，确定测验的构思。要明确测验的内容，使测验的内容全面而具有代表性，不致偏离应测的范围，并要明确各个内容的相对重要性。③编辑测验题目，收集资料，确定形式，编写题目。④预测与项目分析。对预测的基本要求是对象要有代表性、预测情境力求与正式测试一致、预测时间可以延长，以保证受测者完成测验题目、应对预测中受测者的反应给予记录。项目分析就是对预测结果的统计分析，以确定项目的难度和区分度。⑤合成测验，把预测后有价值的项目排成有组织的量表。⑥测验标…	心理测验编制的基本过程通常包括以下几个步骤： 1. 确定测验目的：首先需要明确测验的目的和目标。例如，是为了评估个体的认知能力、情绪状态还是人际关系技能。 2. 确定测验内容：根据测验目的，选择或开发相关的题目和任务。例如，如果是评估数学能力，可能会包括算术、几何、代数等题目。 3. 设计题型：确定测验题目的类型，例如选择题、填空题、判断题、案例分析等。题型的选择应符合测验目的和内容。 4. 试题编写：根据设计的题型，编写具体的试题。确保每个试题都能有效地测量目标能力，并且尽量减少语言或文化偏见。 5. 试题验证：将编写好的试题进行验证，确保它们的有效性和可靠性。这通常包括对试题的内容、结构和统计性质的评估。 6. 试运行：在特定人群中进行试运行，收集数据并进行分析。分析可能包括试题的难度、区分度、以及是否存在偏差。 7. 修订和优化：根据试运行的结果，对试题进行修订和优化，确保测验的有…	心理测验编制的基本过程通常包括以下几个步骤： 1. 确定测试的目的和内容：首先需要明确测试的目的是什么，是用于评估个体的智力水平、人格特质还是其他心理特征。然后确定测试的内容，包括测验项目的种类、数量和难度等。 2. 制定测验项目：根据测试的目的和内容，设计出一系列能够准确评估被试者心理特征的测验项目。这些项目可以是选择题、问答题、观察记录等形式。 3. 试题初步筛选：将设计出来的测验项目进行初步筛选，确保试题的有效性和准确性。可以通过专家评审、试题统计分析等方法进行筛选。 4. 实地测试：在一定数量的被试者身上进行实地测试，收集测试数据。这一步骤能够帮助评估试题的难度、区分度和信度等指标。 5. 数据分析和修订：通过对测试数据的分析，评估测试的质量和效度。根据分析结果，对试题进行修订和改进，确保测验的准确性和可靠性。 6. 编制测验说明书：最后，根据测试的目的和内容，编制出详细的测验说…
5	美国心理学家加德纳提出多元智力理论，认为∶智力是多元的，它由多种智力成分构成。每一种智力依据某-社会对它的需要、奖赏以及它对社会的作用，其价值也不同。每种智力都是一个单独的功能系统，这些系统可以相互作用，产生外显的行为。八种智力成分包括∶言语智力，渗透在所有语言能力之中，包括阅读、写文章以及日常会话能力。大脑的布洛卡区负责产生合乎语法的句子。逻辑-数学智力，包括数学运算与逻辑思维能力，如做数学证明题及逻辑推理。空间智力，包括导航、认识环境、辨别方向的能力，如查阅地图等。大脑的右半球掌管空间位置的判断。音乐智力，包括对声音的辨别与韵律表达的能力，如拉小提琴或写一首曲子等身体运动智力，包括支配肢体完成精密作业的能力，如打篮球、跳舞等。社交智力，包括与人交往且能和睦相处的能力，如理解别人的行为、动机或情绪。自知智力，认识自己并选择自己生活方向的能力。自然智力，包括认识感知自然界事物的各种能力，…	加德纳的多元智力理论是由哈佛大学的心理学家霍华德·加德纳（Howard Gardner）在1983年提出的一种关于智力的理论。根据这个理论，智力不仅仅是单一的、可以衡量的能力，而是由多种不同的认知能力组成的。加德纳提出了七种主要的多元智力类型： 1. 言语智力（Linguistic Intelligence）：这是一种处理语言的能力，包括阅读、写作、讲话和理解语言的能力。例如，作家、演说家和记者通常具有较高的言语智力。 2. 数学智力（Logical-Mathematical Intelligence）：这涉及到逻辑推理、数学概念和抽象思维。数学家、科学家和工程师通常在数学智力上表现出色。 3. 空间智力（Spatial Intelligence）：这包括理解和操作空间关系的能力，如视觉化、方向感和空间安排。建筑师、艺术家和舞者通常具有较高的空间智力。 4. 身体-运动智力（Bodily…	加德纳的多元智力理论认为人的智力不仅仅体现在传统的智商测试中，而是涵盖了多个领域。他提出了八种不同的智力类型，分别是语言智力、逻辑数学智力、音乐智力、空间智力、运动智力、人际关系智力、内省智力和自然观察智力。每个人在这些智力类型上的表现都会有所不同，因此不能仅通过传统的智商测试来评价一个人的智力水平。例如，有些人可能在音乐方面表现出色，而在逻辑数学方面较弱，这并不代表他们的智力就低于其他人。 回答结束
9	(2）前瞻记忆可以分为基于事件的前瞻记忆、基于时间的前瞻记忆和基于活动的前瞻记忆。基于事件的前瞻记忆是指当某个特定的目标事件出现时去执行某个行为的回忆。基于时间的前瞻记忆是指对在某个特定的时间去执行某个行为的记忆。基于活动的前瞻记忆强调的是个体所从事的活动，是指人们在完成当前活动之后或之前去执行前瞻记忆任务，例如，要一个孩子在做完作业后去商店买东西等。本题要求被试看到图片藏起来，属于基于事件的前瞻性记忆	该实验属于隐蔽性记忆实验的类型。隐蔽性记忆实验是一种前瞻记忆实验，其中实验者会向参与者展示一系列物品或信息，并要求他们记住这些信息，但在某些情况下，参与者可能被告知忽略或隐藏某些特定类型的信息。这种实验设计允许研究者探索参与者如何在没有明确指导的情况下处理和记忆信息。 在这个特定的实验中，儿童被要求帮助嘟嘟鼹鼠玩偶记住各种图片的名字，同时避免记住动物图片。这种任务要求儿童在没有明确指导的情况下，自主地决定哪些信息是重要的，哪些应该被忽略或隐藏，这正是隐蔽性记忆实验的典型特征。	回答: (2) 该实验属于事件相关潜在记忆实验。在这个实验中，儿童被要求记住在特定条件下出现的事件（例如，动物的图片），并在未来的时间点进行回忆。通过这种实验设计，研究者可以了解儿童在特定条件下的前瞻记忆能力和表现。 回答结束.
19	知识的表征指知识在头脑中的表示形式和组织结构。知识是通过个体与信息甚至是整个情境相互作用而获得的，个体一旦获得知识，就会在头脑中用某种形式和方式来代表意义，把它储存起来。例如，我们用狗这个词来代表那样一类擅长跑、嗅觉灵敏的动物，但有时说起狗，我们头脑就会浮现狗的形象。陈述性知识以概念、命题、命题网络、表象或图式表征来在头脑中表征。概念代表着事物的基本属性和基本特征，是一种简单的表征形式。如眼镜就包含了这样一些特征∶有两个圆镜片，有两条眼镜腿，用来矫正近视等等。表象是人们头脑中形成的与现实世界的情境相类似的心理图像。如，在判断大象比狮子大时，在短短的时间里，头脑中出现了大象和狮子的模样，并在头脑中将这两个表象进行比较，好像看到了这两个动物一样。命题是意义或观念的最小单位。用于表述一个事实或描述一个状态，通常由一个关系和一个以上的论题组成，关系限制论题。如在电脑坏了这一命题中，电脑是命题谈及…	知识的表征是指将知识从个体的头脑中转移到外部媒介上的过程。这种转移可以是通过语言、图像、符号或其他形式的符号系统来实现的。知识的表征有助于信息的传播、存储和检索，使得知识可以被多个个体共享和利用。 陈述性知识是指关于事实、概念、定义和一般原则的知识。陈述性知识的表征方式通常包括： 1. 语言表述：通过书面或口头的语言来传达知识。例如，科学理论、历史事件的描述、定义等。 2. 图表和图像：使用图表、图像、图形等视觉工具来展示数据和信息。例如，统计图表、地图、流程图等。 3. 符号和代码：使用特定的符号系统来表示知识，如数学公式、化学式、编程语言等。 举例来说，一个科学理论如“引力是万有引力定律描述的自然力”就是一种陈述性知识的表征。这个表征可以通过书面语言（如科学论文）、图表（如引力与质量的关系图）或数学公式（如F = G * (m1 * m2) / r^2）来呈现。	回答开始 知识的表征是指将信息或者经验转化为可被存储、处理、传递和使用的形式。陈述性知识的表征方式通常包括符号、概念、语言等形式。例如，将“狗是一种动物”的陈述性知识可以通过文字或者语言来表示，即用符号“狗”代表这种动物，用语言来表达这种关系。 回答结束
21	观察法的含义观察法是指在自然条件下，对表现心理现象的外部活动进行有系统、有计划的观察，从中发现心理现象产生和发展的规律性。例如，观察儿童与同伴在做游戏时的行为表现，了解儿童与同伴的交往处在哪一发展阶段。观察法的优缺点1.观察法的优点有∶（1）适用范围较大。（2）简便易操作。（3）被观察者处于自然状态，因而获得的材料比较真实、全面。（4）对被观察者的行为进行直接的了解，因而能收集到第一手资料。（5）观察时行为发生和心理活动的整个过程处于进行状态，具有较多的时间信息，在观察的基础上比较有把握做出有关心理因果关系的推论。2.观察法的缺点有∶（1）在自然条件下，事件很难按严格相同的方式重复出现，因此，对某种现象难以进行重复观察，而观察的结果也难以进行检验和证实。（2）由于自然条件下，影响某种心理活动的因素是多方面的，因此观察法得到的结果很难进行精确的分析。（3）观察者缺少主动性，难以控制研究进程…	观察法是一种研究方法，主要用于社会科学和人文学科领域，尤其在心理学中广泛应用。这种方法涉及到对个体或群体的行为、动作、情感表达等进行直接观察。观察者可能是参与者本人，也可能是外部的观察者。观察可以是有意识的，也可以是无意识的，甚至可能是通过录像、录音等技术手段进行。 优点： 1. 直接性：观察法可以直接获取行为的原始数据，不需要依赖于个体的主观报告或记忆。 2. 多样性：通过观察，可以收集到多种类型的数据，包括非言语行为和言语行为。 3. 动态性：观察可以捕捉到行为的动态变化，包括时间序列和情境依赖性。 4. 实时性：观察可以在行为发生时进行，减少了回忆和报告可能带来的偏差。 缺点： 1. 主观性：观察者可能会因为自己的偏见、经验和文化背景而影响观察结果。 2. 难以控制：在自然环境中进行观察时，可能难以控制外部变量和干扰因素。 3. 难以量化：一些行为可能难以量化，特别是那些非言语的行…	观察法是一种心理研究方法，通过观察被研究对象的行为、动作、情绪等来获取数据和信息。这种方法可以直接观察到被研究对象的真实行为，较为客观地记录下来，避免了受访者主观性的干扰。观察法可以用于研究儿童行为、动物行为、人际关系等领域。 优点： 1. 客观性强：观察法可以直接观察到被研究对象的真实行为，减少了受访者的主观性干扰。 2. 准确性高：观察法记录下的数据较为准确，不会出现回忆偏差或虚假回答等问题。 3. 实时性强：观察法可以实时记录被研究对象的行为，不受时间间隔的影响。 缺点： 1. 可能存在观察偏差：观察者的主观因素可能会影响数据的收集和分析，导致观察结果不够客观。 2. 可能受环境因素影响：观察法容易受到环境条件的影响，如观察者的立场、观察环境等。 3. 难以观察心理活动：观察法难以观察到被研究对象的内心活动和思维过程，只能观察外在表现。 总的来说，观察法是一种有效的研究方法，但在实…
23	教育心理学中关于发现学习与接受学习的认知观有∶布鲁纳的认知一发现说和奥苏伯尔的有意义接受说。依据学习主体所得经验的来源不同，将学习分为接受学习和发现学习。接受学习是指在教学系统中，学生将别人的经验变成自己的经验，所学的内容是以某种定论或确定的形式，通过传授者的传授和接受者的主动构建而实现的。发现学习是在主体的活动过程中，通过对现实能动的反映及发现创造，而建构起一定的经验结构而实现的。下面分别从发现学习和接受学习的优缺点分析来比较它们之间的利与弊。发现学习的优点及缺点1.发现学习的优点∶;（1）能够最大限度地发展学生的智力和潜力;（2）激发学生的好奇心，能够使外来动机向内部动机转移，使学生对知识和学习过程本身发生兴趣;（3）学会将来做出发现的最优方法和策略;（4）有助于知识的记忆、保持与检索。2.发现学习的缺点∶（1）无视学生学习的特点，歪曲了接受学习的本意;（2）对发现学习的界定缺乏科学…	在学习的认知观中，接受学习和发现学习是两种不同的学习策略，它们各有利弊。 接受学习（Receiving Learning）通常指的是通过直接接受他人的知识和信息来学习的过程。这种学习方式在于接受和理解已有的知识体系，通常通过教师的讲授、书籍阅读、讲座等方式进行。接受学习的利弊如下： 利： 1. 效率高：接受学习可以快速获取知识，尤其是在时间紧迫或信息量巨大的情况下。 2. 结构清晰：接受学习通常基于已有的知识结构，学习者可以清楚地看到知识的框架和联系。 3. 教育资源：接受学习依赖于教育系统和专业教师，能够提供系统化的知识体系和指导。 弊： 1. 依赖性：学习者可能过于依赖教师或资料，缺乏自主探索和创新的能力。 2. 信息过载：接受学习可能导致信息过载，学习者需要筛选和整理大量的信息。 3. 不适应性：如果学习内容过时或不适应实际情况，接受学习可能导致学习效果不佳。 发现学习（Disco…	接受学习是指通过接受外部信息、知识和技能来学习，而发现学习则是指通过自主探索和实践来积累知识和技能。从学习的认知观出发，接受学习的利处在于可以通过系统化的学习方式获取结构化的知识，有助于理解和掌握基础概念和技能。例如，通过听课、阅读教材等方式进行接受学习可以快速获取大量知识。而发现学习的利处在于可以培养学习者的主动性和创造力，通过实践和探索来加深对知识的理解和运用。例如，通过实验、项目等方式进行发现学习可以激发学习者的学习兴趣和动力。 然而，接受学习可能存在的弊处是学习者可能过于依赖外部信息和教学资源，导致缺乏主动性和创造力。而发现学习的弊端在于可能需要更多的时间和精力，同时由于自主性较强，可能存在学习方向不明确或者学习效果不稳定的情况。 因此，综合来看，接受学习和发现学习各有其利弊，可以根据学习者的特点和学习目的进行选择和结合，以达到更有效的学习效果。 回答结束。
25	1）自我价值理论关注人们如何评估自身价值。自我价值理论的基本假设是当自我价值受到威胁时，人类将竭力维护。自我价值理论认为人类将自我接受作为最优先的追求。这种保护和防御以建立一个正面的自我形象的倾向，就是自我价值动机。（2）科温顿根据追求成功和避免失败两个维度，可以将动机倾向分为四类∶①高趋低避型∶又称作成功定向者，对学习有极高的自我卷入水平。他们的学习超越了对能力状况和失败状况的考虑。②低趋高避型∶又称作逃避失败者，他们更看重逃避失败而非期望成功。他们不一定存在学习问题或学习困难，只是对课程提不起兴趣。其背后隐藏着强烈的对失败的恐惧，感受着高度的焦虑和紧张。③高趋高避型∶又称作过度努力者，同时受到成功的诱感和失败的恐惧。对任务又爱又恨，常常处于一种冲突状态。通常是教师非常喜欢的孩子，有一种隐讳努力的现象。④低趋低避型∶又称作失败接受者，不奢望成功，对失败也不感到丝毫恐惧或者羞愧。对成就表…	成就动机的自我价值理论是由心理学家爱德华·迪克（Edward Deci）提出的。这个理论认为，人们的行为和动机受到内在动机和外在动机的影响。内在动机源自于对活动本身的兴趣和满足感，而外在动机则是由外部因素如奖励或评价所驱动。 自我价值理论认为，内在动机与自我实现和自我价值感的提升有关。当人们从内在动机中获得成就时，他们会感到自我价值的提升，这种提升会进一步增强他们对相关活动的兴趣和投入。相反，过度依赖外在动机可能会导致内在动机的减弱，因为外在奖励可能会削弱对活动本身的兴趣。 例如，一个孩子可能因为外在奖励（如糖果或玩具）而开始练习钢琴，但随着时间的推移，如果奖励停止，他们可能会失去对练习的兴趣，因为他们的内在动机（如对音乐的热爱或自我实现感）没有得到足够的培养。相反，如果孩子从一开始就因为对音乐的热爱而开始练习，他们可能会持续地对练习感兴趣，即使没有外在奖励。	自我价值理论是由心理学家卡尔·罗松在20世纪70年代提出的，主要强调人们追求成就的动机是为了实现自我价值的肯定。根据这一理论，个体会通过与他人比较来评价自己的表现，从而获得自我肯定和满足感。当个体在一项任务中取得成功时，他们会感到自己的能力和价值得到了认可，从而激发他们继续追求更高的成就。 举例来说，一个学生在考试中取得好成绩后，会感到自己的学习能力和智力受到了认可，从而更有动力去学习和取得更好的成绩。同样地，一个职场人士在工作中得到了表扬和晋升，也会感到自己的能力和价值被认可，从而更有动力去追求更高的职业成就。 总的来说，自我价值理论认为成就动机源于个体对自己的能力和价值的追求，通过取得成功来获得自我肯定和满足感，从而激发自己不断追求更高成就的动力。 回答结束.
31	（1）短时记忆∶指信息一次呈现后，在大脑中保持一分钟左右的记忆。其特点是保存信息时间短暂，保存信息的容量有限。作为三级记忆系统的中间阶段，短时记忆是信息从感觉记忆到长时记忆之间的一个过渡阶段。其功能是暂时地存储信息，以使信息进入长时记忆。短时记忆编码的方式为视觉编码和听觉编码。（2）短时记忆编码的效果受到如下因素的影响∶①个体的觉醒状态。觉醒状态即大脑皮层的兴奋水平，它直接影响到记忆编码的效果。例如，艾宾浩斯通过实验发现，被试者在上午十一二点之间的学习效率最高，下午六点至八点之间效率最低。这可能与不同时间的不同觉醒状态有关。②材料的加工深度。认知加工深度是影响短时记忆编码的重要因素，语义加工效果要好。③组块。短时记忆的突出特点是容量有限，容量为7±2个组块。对记忆的内容组块化或者扩大每一个组块包含的信息量可以提高记忆的编码效果。④材料的数量和质量。材料数量越多，对材料的编码效果越差。越具…	短时记忆是指能够在没有外部记忆援助的情况下维持一段时间的信息存储。它通常被认为是由大脑的工作记忆系统负责管理，特别是由颞叶的颞叶皮层和前额叶皮层的工作记忆网络共同参与。短时记忆的容量有限，大约可以存储7±2个信息单元，这个概念被称为“魔术数字七”。 影响短时记忆编码的因素有很多，包括但不限于： 1. **信息的相关性**：相关信息更容易被编码到短时记忆中。例如，如果你在听一个讲座，讲座中的信息如果与你之前的知识或经验相关联，你会更容易记住这些信息。 2. **信息的重要性**：人们更容易记住那些对他们有重要意义的信息。例如，紧急情况下的信息往往会被更好地记住，因为它们对生存或安全至关重要。 3. **信息的可视化程度**：能够形成图像或视觉化的信息更容易被记住。例如，记忆一个故事比记忆一串数字通常更容易，因为故事可以通过情节和角色来可视化。 4. **个体差异**：不同的人在短时记忆方面…	回答: 短时记忆是指信息仅在短暂时间内被暂存并保持的记忆系统，通常持续时间为数秒至数分钟。影响短时记忆编码的因素包括注意力、意义性、情感因素、重复次数等。例如，如果一个信息被注意到并且具有一定的意义性，那么它更容易被编码到短时记忆中。此外，重复次数越多，信息被编码到短时记忆中的机会也越高。因此，这些因素都会影响一个信息是否能够被有效地记忆和保持在短时记忆中。 回答结束
33	1）形式训练说∶是一种早期的学习迁移理论。主张迁移要经过一个"形式训练"的过程才能产生。认为通过一定的训练，可以使各种官能得到发展，从而转移到其他学习上去。以官能心理学为基础，官能心理学认为人的心理是由许多不同的官能组成的。官能就是注意、知觉、记忆、思维、想象等。形式训练说认为，迁移是无条件的，自动发生的，对官能的训练就如同对肌肉的训练一样。记忆的官能通过记忆的训练而得到增强，推理和想象的官能则通过推理和想象的训练得以增强。训练和改进各种心理官能是教学的重要目标，教育的任务就是改善学生的各种官能，而改善以后的官能就能自动的迁移到其他的学习中。（2）对教育的影响∶从形式训练说的角度看，心理是由各种成分组成的整体，一种成分的改进会增加其他的各种官能，迁移就是各种官能得到训练而发展的结果。按照形式训练说的观点，传递知识没有训练官能重要，知识的价值仅在于训练官能的材料。学校选择的材料不必重视其使…	学习迁移的形式训练说是一种教育理论，它强调学习过程中的知识和技能在不同情境之间的转移和应用。这种理论认为，学习不仅仅是为了掌握某一具体技能或知识点，而是为了培养能够在多种情况下应用这些技能和知识的能力。 形式训练说认为，通过系统的训练和实践，可以帮助学生建立起一种通用的认知策略，这些策略可以在不同的学习任务和情境中被有效地应用。这种策略的建立有助于学生在面对新挑战时能够快速适应和学习。 形式训练对教育的影响是显著的。首先，它强调了教学方法的重要性，鼓励教师采用能够促进学生建立通用认知策略的教学方法。例如，通过案例分析、模拟实验和批判性思维训练等活动，学生可以学习如何在不同的情境下应用所学知识。 其次，形式训练说促进了学生的自主学习能力。通过培养学生的自我监控、自我评估和自我调整能力，学生能够在未来的学习中更加自信和有效地应用所学知识。 最后，形式训练说还强调了跨学科学习的重要性。通过将不…	学习迁移是指一个在学习某个任务或领域中所获得的知识、技能或策略是否能够被成功地应用到其他任务或领域中的能力。形式训练是指在学习过程中，通过系统化、结构化的教学方法来帮助学生掌握某种知识或技能。形式训练可以提高学生的学习效果，帮助他们更好地掌握知识和技能，从而促进学习迁移的发生。 形式训练对教育的影响主要体现在以下几个方面： 1. 帮助学生建立知识框架和技能体系：形式训练能够帮助学生系统地学习知识和技能，建立起完整的知识框架和技能体系，从而为学习迁移奠定基础。 2. 提高学生的认知能力和问题解决能力：形式训练能够培养学生的思维能力、分析能力和解决问题的能力，使他们能够更好地应对各种学习和生活中的挑战。 3. 促进学生的终身学习能力：通过形式训练，学生可以掌握一定的学习方法和技巧，培养自主学习的能力，从而使他们具备终身学习的意识和能力，不断提升自己的知识水平和技能。 总的来说，形式训练对教育…
39	托马斯和切斯提出的各种婴儿气质类型的特点托马斯和切斯提出儿童的气质可以从9个方面进行评价，包括活动水平、节律性、注意的转移、趋近与退缩、注意的广度和坚持性、适应性、反应强度、反应闯限、心境质量等。。在此基础上他们聚类分析出3种气质类型的儿童:“容易型”(easy)，大约占 40%。这些婴儿性情温和，有满足感，快乐，对新的经验(比如接触陌生人)非常开放并具有适应性。他们大体上表现出积极的倾问，有好奇心。他们有定时吃东西和睡眠的习惯他们也能够忍受挫折和不适。“困难型”(diffcult)，大约占 10%。这些婴儿活跃，易怒，习惯没有规律。他们常常对生活常规的变化做出消极反应，对新的人和环境的适应较慢，并倾向于退缩。他们经常大声哭啼，遇到挫折时常常发脾气。“慢热型”(slow-to - wamm-up)，大约占 15%。这些婴儿相对不太活跃，有点闷闷不乐每天的生活有一点规律。他们像困难型的婴儿…	托马斯和切斯提出的婴儿气质类型主要包括以下四种：易激惹性、神经质、情绪性和适应性。这些气质类型是根据婴儿在不同情境下的反应来区分的，并且通常认为这些气质特征在婴儿出生时就已经存在，并且在儿童成长过程中保持相对稳定。 1. 易激惹性：易激惹的婴儿在受到刺激时反应迅速且强烈。他们可能会在轻微的触碰或声音中表现出不满。对于抚养者来说，理解易激惹的婴儿需要更多的耐心和温柔的处理方式，以避免过度刺激。例如，抚养者可以通过预测和准备来减少不必要的惊吓，确保婴儿有足够的休息和安静的时间。 2. 神经质：神经质的婴儿在情绪上表现出高度的灵活性和易变动性。他们可能会在短时间内从高兴转变为悲伤。抚养者需要学会识别和应对这些情绪变化，提供稳定的情感支持和一致的照顾方式。 3. 情绪性：情绪性婴儿在情绪上表现出强烈的反应，但这些反应通常是短暂的。他们可能会在受到欢迎和关注时表现得非常开心。抚养者可以通过积极的互…	托马斯和切斯提出的婴儿气质类型包括易兴奋型、难搞型、易悲伤型和难悲伤型。易兴奋型婴儿通常表现出高活跃性、活泼好动，对外界刺激敏感；难搞型婴儿则表现出易受到刺激而情绪化、易受挫折；易悲伤型婴儿对负面情绪反应强烈，容易受到环境影响；难悲伤型婴儿则表现出对情绪刺激不敏感，难以产生情感连接。 这些婴儿气质类型对儿童抚养有着重要的启示意义。首先，家长和抚养者应了解婴儿的气质类型，以便更好地与他们相处。对易兴奋型的婴儿，需要提供更多的刺激和活动，而对难悲伤型的婴儿则需要更多的情感支持。其次，了解婴儿的气质类型可以帮助父母更好地调整抚养方式，避免使用不适当的教养方式导致儿童产生负面情绪或行为问题。 举例来说，对于易兴奋型的婴儿，父母可以提供更多的体感刺激，比如游戏和玩具，以满足他们的活跃性；而对难悲伤型的婴儿，则需要更多的安抚和安慰，避免让他们感到孤独和忧虑。 总的来说，了解婴儿的气质类型有助于父母更…
40	闪光融合临界频率是指闪烁刚刚达到融合时的光刺激问歇的频率。影响闪光融合临界频率的主要因素有:光相强度，闪光融合临界频率随光相的强度增高而增高;刺激面积，闪光融合临界频率随闪光照射的区域面积的增大而增大;在视网膜中，锥体细胞比棒体细胞有较高的时间视觉敏度;另外，声音味觉、嗅觉等刺激都可以改变闪光融合临界频率。	闪光融合临界频率（Flash Fusion Critical Frequency, FFCF）并不是一个广泛认可的术语，可能是指闪光融合阈值（Flash Fusion Threshold, FFT），即在视觉感知中，两束闪光同时出现时，观察者能够感知为单一光源的最低频率。这种现象通常在研究视觉系统的并行处理能力时被研究。 闪光融合阈值受到多种因素的影响，主要包括： 1. **闪光强度**：闪光的亮度越高，观察者能够感知到融合的概率越高。亮度差异较大时，观察者更容易感知到两个独立的光源。 2. **闪光间隔**：闪光之间的时间间隔也会影响融合阈值。如果闪光之间的间隔太短，观察者可能无法感知到融合；如果间隔太长，可能会被视为两个独立的光源。 3. **视觉注意力**：当观察者专注于特定区域时，可能会提高对闪光融合的敏感度。 4. **个体差异**：不同的人可能因为视觉系统的差异而对闪光融合阈…	闪光融合临界频率是指两个不同的光源闪烁频率达到一定程度后，人眼无法分辨两个光源分开的频率。这种现象被称为闪光融合。 影响闪光融合临界频率的主要因素包括： 1. 光源的频率差异：两个光源的频率差异越大，闪光融合的临界频率就越高。 2. 光源的强度：光源的强度越大，闪光融合的临界频率也会随之增加。 3. 视觉刺激的持续时间：视觉刺激持续时间越长，闪光融合的临界频率也会增加。 举个例子，如果一个人在强光下看到两个闪烁频率相差较大的光源，那么他的闪光融合临界频率可能会比在弱光下看到相同的两个光源时更高。 回答结束
41	统计量和参数都是反映数据特征的数量，但它们分别是相对于样本和总体而言的，统计量是反映样本特点的数字特征，而参数是反映总体特点的数字特征它们经常联系在一起，实际上，推断统计就是利用样本统计量来对总体参数进行估计或者假设检验。	统计量和参数是统计学中两个重要的概念，它们在统计分析中扮演着不同的角色。 参数是研究中未知的量，它们是人口参数，描述了总体的特性。例如，总体均值（μ）、总体标准差（σ）和总体比率（p）都是参数。参数通常是我们想要估计的量，但由于我们无法直接观察到总体，所以需要通过样本数据来估计它们。 统计量则是基于样本数据计算出来的量，它们是样本统计量，用于估计总体参数。例如，样本均值（x̄）、样本标准差（s）和样本比率（p̂）都是统计量。统计量是我们可以直接计算的，它们的值会因为抽取的不同样本而有所不同。 参数和统计量之间的联系在于，统计量通常被用来估计参数。例如，样本均值（x̄）可以用来估计总体均值（μ）。统计量的计算通常基于样本数据，而参数是这些统计量所试图估计的真实值。 举个例子，如果我们想要估计一群学生的平均成绩，我们可以从这群学生中随机抽取一部分学生来计算他们的平均成绩，这个计算出来的平均成…	统计量是根据样本数据计算得出的数值，用来描述样本特征的指标，比如样本的均值、标准差等。而参数是描述总体特征的指标，通常是通过对整个总体数据进行推断或估计得出的，比如总体的均值、方差等。统计量是对参数的估计或推断，通过对样本数据的分析来推断总体的特征。统计量和参数之间的联系在于统计量可以通过样本数据对参数进行估计，从而了解总体的特征。同时，统计量也可以用来检验关于总体参数的假设。因此，统计量和参数是统计学中密切相关的概念，用来描述和推断总体和样本的特征。 回答结束
42	韦纳认为，能力、努力、任务难度和运气是人们在解释成功和失败时知觉到的四种主要原因，每一种原因又可从控制点、稳定性、可控性三个维度进行分析，每一维度对动机都有重要的影响。根据控制点维度，可将原因分成内部和外部的:将成功归因于内部原因，会产生白豪感:归因于外部素，则会产生侥幸心理将失败归因于内部因素，会产生羞愧的感觉:归因于外部因素，则会感到气愤。根据稳定性维度，可将原因分成稳定和不稳定的:将成功归因于稳定因素，会产生自豪感，从而增强动机;归因于不稳定因素，则会产生侥幸心理。将失败归因于稳定因素，将会产生绝望的感觉;将失败归因于不稳定因素，则会感到气愤。根据可控性维度，又可将原因分成可控的和不可控的。将成功归因于可控因素，则会积地去争取努力:归因于不可控因素，则不会产生多大的动力。将失败归因于可控因素则会继续努力:归因于不可控因素，则会绝望。将失败归因于内部、稳定、不可控时，会产生习得性无助…	学习动机的归因理论是指人们对自己学习成果的解释和归因，这些解释和归因会影响他们的学习动机和行为。归因理论主要涉及两个方面：内在归因和外在归因。 内在归因是指将学习成果归因于个人的内在因素，如能力、努力或态度。例如，如果一个人认为自己取得好成绩是因为自己的努力和天赋，他们可能会感到自豪并且更加动力去学习和提高自己的能力。内在归因通常被认为是积极的，因为它能够促进自我增强和持续的学习动机。 外在归因则是将学习成果归因于外在因素，如环境、他人的帮助或运气。例如，如果一个人认为自己取得好成绩是因为老师的帮助或考试题目容易，他们可能不会将这种成果视为自己的能力提升，而是可能会依赖于外部因素。外在归因可能会导致依赖性和不稳定的学习动机，因为当外部因素不再存在时，学习动机可能会减弱。 归因理论的重要性在于它能够帮助教育者和心理学家理解学生的学习动机和行为，并采取适当的策略来增强学生的内在归因，从而促进…	学习动机的归因理论是指个体对自己的学习成绩或者表现所产生的动机的解释和归因。根据归因理论，个体对自己的学习成绩或者表现产生动机的原因主要可以分为内部归因和外部归因两种。内部归因是指个体认为学习成绩或者表现的原因在于自身的能力、努力、态度等内在因素，而外部归因则是指个体将学习成绩或者表现的原因归因于外在环境或者情境因素，比如运气、教师的教学水平等。 举例来说，如果一个学生在考试中取得了好成绩，他可能会将这一成绩归因于自己的努力学习或者优秀的能力（内部归因），也可能会将这一成绩归因于考试题目比较简单或者运气好（外部归因）。根据归因理论，个体对学习成绩或者表现的归因方式会影响到他们未来的学习动机和表现。 回答结束.
50	元认知由元认知知识、元认知体验和元认知控制三个部分构成。元认知的核心是元认知控制。元认知知识关于影响自己的认识过程与结果的各种因素及其影响方式的知识。包括:关于认知主体的知识，即对于自己的兴趣、爱好、能力、学习方式以及自己在学习特定内容时的局限的认识和了解。②关于认知对象的知识，即关于认知材料、认知任务以及认知活动的认知。③关于学习策略的知识即知道可用于特定学习活动的策略有哪些，他们各有什么优缺点以及具体运用某些策略需要什么条件等。包括认知策略、元认知策略以及资源管理策略的知识。(2)元认知体验指主体在元认知活动中的认知体验和情感体验。包括肯定和否定两个方面。认知体验包括知和不知的体验。情感体验包括预感失败后产生的焦虑，预感成功后产生的喜悦，从成功的经验中获得心得，从失败的经验中获得教训，借此产生信心，等等。情感的体验既可能发生在认知活动之前，也可能发生在认知活动之后(3)元认知控制根据…	元认知是指人们对自己的认知过程的意识和控制。它包括对自己的记忆、学习、思维和情感等认知过程的理解和评估。元认知结构主要包括以下几个方面： 1. 认知监控：这是元认知的核心，它涉及到对认知过程的监控和调节。例如，当你在学习新知识时，你可能会注意到自己的理解程度，决定是否需要更深入地研究某个概念。 2. 认知评估：这是指对自己的认知能力进行评估，包括对记忆、学习和思维速度等方面的自我评估。例如，你可能会通过自我测试来评估自己的记忆力。 3. 认知调节：这是指根据认知监控和评估的结果，采取措施来调整自己的认知过程。例如，如果你发现自己在解决数学问题时效率低下，你可能会尝试更有效的学习策略。 4. 认知反思：这是指对自己的认知过程进行深入的思考和分析。例如，你可能会反思自己的学习习惯，思考哪些方法有效，哪些方法不太好。 元认知对于个人的学习和发展非常重要，因为它可以帮助人们更好地理解自己的认知过…	元认知是指对自己的认知过程和认知能力进行认知的能力。它包括对自己的注意力、记忆、学习和问题解决等认知过程的监控、调节和控制。元认知的结构可以分为三个主要部分：知识、监控和调节。 1. 知识：元认知知识是指个体对自己认知过程的了解，包括自己的注意力、记忆、学习策略等。这种知识有助于个体更好地理解自己的认知过程，从而更有效地管理和控制自己的认知活动。 2. 监控：监控是指个体对自己认知过程的观察和评估。通过监控，个体可以了解自己的认知活动是否顺利进行，是否存在问题或困难。监控可以帮助个体及时发现认知问题，并采取相应的措施进行调整。 3. 调节：调节是指个体根据对自己认知过程的监控，采取相应的措施对认知过程进行调整和控制。例如，个体可以采取更有效的学习策略来提高记忆能力，或者调整注意力分配来提高学习效果。 通过对元认知的监控和调节，个体可以更好地理解自己的认知过程，提高自我控制能力，从而更好地…
52	社会化(socialization)通常指个体在社会影响下，通过学习社会知识，掌握社会技能，建立社会经验，并通过自身不断的选择和建构，形成一定社会所认可的心理一行为模式，成为社会成员的过程。社会化可以是自觉和积极主动的，也可能是不自觉和消极被动的:可以是有意识、有目的地实现的，也可能是在无意识、潜移默化中完成的。	社会化是指个体从出生开始，通过与社会环境的互动和交流，逐渐学习和内化社会规范、价值观、行为模式和文化习俗的过程。社会化是一个持续的过程，涉及个体与家庭、学校、社区、媒体和其他社会机构的相互作用。通过社会化，个体能够适应社会环境，发展必要的社会技能，并成为社会成员。 社会化的过程可以分为两种类型：主动社会化和被动社会化。主动社会化是指个体主动地学习和适应社会规则和期望的过程，例如，通过参与学校教育和社会活动。被动社会化则是指个体通过观察和模仿他人的行为来学习社会规范的过程，例如，通过家庭环境和媒体的影响。 社会化对于个体的发展至关重要，它不仅影响个体的行为和态度，还影响他们的认知、情感和社会关系。社会化的缺失或不当可能导致个体与社会的不适应和冲突。	社会化是指一个个体在社会环境中通过学习和交往逐渐习得并内化社会规范、价值观和行为方式的过程。在这个过程中，个体会不断地接受来自周围社会的影响，逐渐形成自己的社会身份和角色。社会化是一个长期的过程，涉及到个体与家庭、学校、朋友、媒体等各种社会因素的互动。通过社会化，个体能够适应社会环境，学会与他人合作、沟通和互动，形成自己的个人特质和行为习惯。 举例来说，一个孩子在家庭中学会尊重长辈、分享玩具，在学校中学会团结合作、遵守纪律，在社交媒体中学会表达自己的观点和情感。这些都是社会化过程中的一部分。 回答结束
63	教育是个体在心理发展过程中所接受的来自环境的最主要的影响，也是个体心理发展过程中起主导作用的因素。教育与心理发展的关系主要体现在两方面一方面，教育受个体已有心理发展水平的制约:另一方面，教育又能促进个体的心理发展。个体心理发展对教育的制约作用。个体的学习准备状态包括生理准备状态和心理准备状态两方面。生理准备状态，尤其是脑和神经系统发育与成熟的程度，是个体接受教育的自然前提。心理准备状态包括智力因素的准备和非智力因素的准备两个方面。教育对个体心理发展的促进作用。第一，发展性教学。教育受个体已有的心理发展水平的制约，仅仅是教育与心理发展关系的一个方面。在教育与心理发展的关系中，更重要的是要看到教育对心理发展的促进作用。第二，早期教育，	心理发展与教育之间存在着密切的关系。心理发展是指个体从出生到成熟过程中，心理功能、心理结构和心理过程的逐步发展变化。教育作为一种社会实践活动，通过对个体的知识、技能、态度和价值观的培养和塑造，直接影响个体的心理发展。 教育可以促进心理发展的几个方面： 1. 认知发展：教育通过提供丰富的学习材料和学习机会，帮助儿童和青少年发展和增强他们的认知能力，如注意力、记忆力、思维逻辑等。 2. 情感发展：教育通过情感教育和社会化过程，帮助个体建立和发展健康的情感，培养同情心、责任感和社会责任感。 3. 社会化发展：教育是社会化的重要途径，它通过教育内容和教育过程，传授社会规范、价值观和文化知识，帮助个体适应社会。 4. 个人发展：教育不仅仅是知识的传授，更是个人能力和潜力的培养。通过教育，个体可以发展自我意识、自我效能感和自我实现的能力。 5. 心理健康：教育还可以促进个体的心理健康，通过心理健康教…	心理发展与教育有着密切的关系，因为教育是促进个体心理发展的重要手段之一。在心理学理论中，儿童的认知、情感、社会交往等方面的发展都受到教育环境的影响。教育可以提供适当的刺激和支持，促进个体的心理发展，帮助他们建立自信、学会合作、发展创造力等。例如，教育可以通过教学活动、游戏、社交互动等方式，促进儿童的认知和情感发展，帮助他们建立自我认知和社会技能。 另外，心理学研究也为教育提供了理论支持和实践指导。通过心理学研究，我们可以了解儿童的认知发展规律、情绪管理机制等，从而设计更有效的教育方法和策略。比如，根据皮亚杰的认知发展理论，我们知道儿童在不同年龄段具有不同的认知能力，因此在教学中可以根据孩子的认知水平制定相应的教学内容和方式。 总的来说，教育不仅是推动个体心理发展的重要因素，同时也受到心理学的理论和研究的指导，促进教育更科学、有效地进行。 回答结束。
66	知觉恒常性是指当知觉的客观条件在一定范围内改变时，我们的知觉映象在相当程度上却保持着稳定性。在我们的日常生活中，知觉恒常性也扮演着重要的角色。从高楼顶上看街道上的行人，尽管看上去很小，但人们不会把他们都看作是小孩。远处行驶的汽车看起来很小，但人们并不认为汽车变小了。知觉恒常性使我们的知觉并不随着客观条件的变化而时刻变化，对于我们获得确定的信息有重要的意义。	知觉的恒常性是指知觉过程中的一种心理现象，即人们在不同的条件下对某些特征保持一致的感知。这种恒常性有助于我们在环境变化的情况下保持对周围世界的稳定感知。 例如，恒常性在知觉过程中的一个典型例子是“恒常大小”（size constancy）。这种恒常性指的是即使物体的视角大小发生变化，人们仍然能够正确地感知物体的实际大小。例如，当你站在山脚下看向山顶时，山顶的视角会显得非常小，但你知道山顶实际上是非常大的。这种恒常性有助于我们在不同的距离和光线条件下准确地感知物体的大小，这对于我们的日常活动和空间导航至关重要。 恒常性在知觉过程中的意义在于它帮助我们建立了对外部世界的稳定和一致的理解。它有助于我们在环境的变化中保持认知的一致性，减少了由于外部条件变化而引起的感知混乱。这种稳定性对于我们的认知和行为至关重要，因为它使我们能够依赖于我们对世界的感知，并且能够有效地与环境互动。	回答: 知觉的恒常性是指在不同环境条件下，我们对物体的感知能够保持相对稳定和一致。换句话说，即使在不同的光线、角度、距离等条件下，我们仍然能够识别出相同的物体。 举例来说，当我们看到一个圆形的球体，无论是在白天还是晚上、近处还是远处，我们都能够辨认出它是一个球体。这是因为我们的大脑能够根据过去的经验和知识，对不同条件下的物体进行识别和理解，从而保持了知觉的恒常性。 在知觉过程中，恒常性的意义在于帮助我们更准确地理解和感知周围的世界，使我们能够更好地适应不同的环境条件。通过保持知觉的恒常性，我们能够更快速地做出反应，更好地应对各种挑战和情况。 回答结束
69	序列反应时范式是尼森和比勒姆于1987年提出的。式以反应时为指标，整个实验过程十分类似一个选择反应时实验:处于不同空间位置的是决策及分别对应不同的反应键，每次呈现一个视觉刺激，被试按相应键尽快予以反应，该刺激随即消失，短暂的时间间隔之后出现下一个视觉刺激。序列反应时范式的特点是，整个实验中刺激的呈现序列是有规律的。序列反应时的研究表明，反应时的差异对应着心理过程的差异。在序列反应时实验中，对固定序列和随机序列的反应都是对同样刺激的同样规则的选择反应任务，因此两者的反应时差异只能说明对固定序列中的目标刺激做出反应相对容易，从而使反应时缩短，而对于随机序列，选择反应的心理过程没有易化，反应较为困难，因此反应时间相对较长。通常，这种心理过程的易化只能是由个体的学习所引发，这种学习就是内隐学习。(5)序列反应时任务试图将反应时实验的逻辑应用于无意识心理过程的研究，这是具有积极意义的。然而标准序列…	序列反应时范式（Serial Reaction Time Paradigm）是一种常用的实验设计，用于研究大脑如何处理和响应序列信息。这种范式通常涉及以下几个步骤： 1. 参与者被要求学习一个特定的刺激-反应序列。例如，一个视觉刺激序列，例如不同颜色的圆圈，按照特定的顺序出现。 2. 在学习阶段，参与者需要通过反馈来调整他们的反应，以确保他们能够准确地跟踪和响应刺激序列。 3. 一旦学习完成，实验师会开始呈现刺激序列，并测量参与者对每个刺激的反应时间。 序列反应时范式特别有用，因为它可以揭示大脑如何处理和优化基于习惯的行为。这种范式经常用于研究大脑的前额叶皮层在习惯形成和执行过程中的作用。例如，研究表明，前额叶皮层在习惯形成的早期阶段起着关键作用，而随着习惯的巩固，其他脑区如杏仁核和海马体的参与增加。	回答: 序列反应时范式是一种心理实验中常用的范式，用于研究个体对序列刺激的反应过程。在这种实验中，被试需要按照一定顺序对一系列刺激做出反应，通常包括按键盘上的某些键、移动鼠标等动作。这种范式可以帮助研究者了解个体对序列刺激的认知加工过程、注意力分配、反应速度等心理过程。 举例来说，一个常见的序列反应时范式是N-back任务，被试需要根据当前呈现的刺激以及之前几个刺激的信息，判断当前刺激是否与之前某一个刺激相同。这种任务可以考察个体的工作记忆能力和反应灵敏度。 总之，序列反应时范式是一种重要的实验设计，可以帮助研究者深入了解个体在面对序列刺激时的认知加工过程。 回答结束.
74	智力发展的一般趋势人的一生大致可分为八个不同的时期，即乳儿期、婴儿期、幼儿期、童年期、少年期、青年期、成年期和老年期。在人的一生中，能力的发展趋势如下:童年期和少年期是某些能力发展的关键期。从三、四岁到十二,十三岁，智力的发展与年龄的增长几乎等速。以后随年龄的增长，智力的发展呈负加速变化;年龄增加，智力发展趋于缓和。人的总体智力在 18~25 岁间达到顶峰。但智力的不同成分达到顶峰的时间是不同的。根据对人的智力的毕生发展研究，人的流体智力在中年之后有下降的趋势，而人的品体智力在人的一生中是稳步上升的。(4)成年是人生最漫长的时期，也是能力发展最稳定的时期。成年期又是一个工作时期。在二十五、六岁至四十岁间，人们常出现富有创造性的活动(5)能力的发展趋势存在个体差异。能力高的发展快，达到高峰的时间晚;能力低的发展慢，达到高峰的时间早。	智力发展是一个复杂的过程，涉及认知能力的多方面发展。一般来说，智力发展可以分为几个阶段，每个阶段都有其特定的发展趋势。 1. 婴儿期（0-2岁）：在这个阶段，孩子的智力发展主要集中在感官和感知能力的发展上。他们开始学习如何理解和使用语言，以及如何与周围的环境互动。例如，婴儿会通过观察和模仿来学习新技能。 2. 学龄前期（3-5岁）：在这个阶段，孩子的认知能力开始迅速发展，他们开始学习如何解决简单的问题，理解基本的逻辑关系，并且开始展现出创造性思维。例如，通过玩具和游戏，孩子们学习如何将事物分组和分类。 3. 学龄期（6-12岁）：在这个阶段，孩子们的认知能力进一步发展，他们开始能够理解更复杂的概念，进行抽象思维，并且能够解决更复杂的问题。例如，孩子们开始学习数学中的算术运算和基本的几何概念。 4. 青少年期（13-19岁）：在这个阶段，智力发展更加专注于抽象思维和批判性思维能力的发展。青…	智力发展的一般趋势可以分为婴幼儿期、儿童期、青少年期和成年期四个阶段。 在婴幼儿期，智力主要表现为感知和运动能力的发展。随着年龄增长，婴幼儿开始学会观察和模仿周围的人和事物，从而逐渐建立起对世界的认知。 在儿童期，智力的发展主要体现在语言能力、记忆力、逻辑思维和问题解决能力的提高。儿童开始学会运用语言来表达自己的想法和情感，开始学习数学、科学等知识，逐渐建立起对世界的系统化认知。 青少年期是智力发展的关键时期，青少年逐渐建立起自己的价值观和世界观，开始独立思考问题，拥有更强的逻辑思维和批判性思维能力。 成年期是智力发展的稳定阶段，成年人在工作和生活中不断积累经验，不断学习新知识，保持大脑的活跃性和灵活性，以应对各种挑战和问题。 总的来说，智力发展的一般趋势是从简单到复杂、从具体到抽象、从表象到本质的发展过程，是一个逐步完善和提高的过程。 回答结束.
77	儿童的同伴关系是儿童在交往过程中建立和发展起来的一种儿童间特别是同龄人间的人际关系。儿童间的交往是促进儿童发展的有利因素，同伴关系有利于儿童社会价值的获得、社会能力的培养以及认知和健康人格的发展。首先，同伴可以满足儿童归属和爱的需要，以及尊重的需要。其次，同伴交往为儿童提供了学习他人反应的机会。再者，同伴还是儿童特殊的信息渠道和参照框架。此外，同伴还是儿童得到情感支持的一个来源。	儿童的同伴关系是儿童社会化过程中非常重要的一部分，它们在儿童的认知、情感和行为发展中扮演着关键的角色。同伴关系通常指的是儿童在同龄人中形成的非家庭成员之间的互动和关系。 在同伴关系中，儿童可以学习如何与他人合作、竞争和解决冲突。这些互动有助于儿童发展社交技能，如沟通、共情和协调行为。例如，儿童在玩游戏时需要协调行动，分享玩具时需要学会妥协，这些都是在同伴关系中学习到的。 同伴关系还促进了儿童的认知发展。通过与同龄人的互动，儿童可以学习新的知识和技能，比如语言、数学和科学概念。同伴之间的讨论和探索可以激发儿童的好奇心和创造力。 此外，同伴关系对于儿童的情感发展也至关重要。儿童在同伴关系中学习如何处理情绪，如快乐、悲伤、愤怒和羞耻。他们还学会如何建立和维护友谊，以及如何处理与朋友之间的冲突。 同伴关系的作用还体现在儿童的自我认知和自我概念上。通过与同龄人的互动，儿童可以了解自己在社会中的位置…	儿童的同伴关系是指他们与同龄或者类似年龄的其他孩子之间的互动关系。同伴关系在儿童的发展中扮演着非常重要的角色。首先，同伴关系可以促进儿童的社交技能的发展，帮助他们学会与他人相处、沟通和解决冲突。通过与同龄伙伴的互动，儿童可以学会分享、合作和互相支持，这些都是在日常生活中非常重要的技能。 其次，同伴关系也对儿童的心理健康和情绪发展起着重要作用。良好的同伴关系可以带来积极的情感体验和支持，增强儿童的自尊和自信心。同时，通过同伴关系，儿童还能够建立自己的身份认同和社会关系，帮助他们更好地适应社会环境。 总的来说，儿童的同伴关系对他们的发展有着深远影响，不仅有助于社交技能和情感发展，还可以促进他们的认知和学习能力的提升。 回答结束.
88	社会性认知是指对自己和他人的观点、情绪、思、动机的认知，以及对社会关系和集体组织间关系的认知，与认知能力的发展相适应，社会性认知在容上涉及三个不同的层次:一是关于个人的认知，包括对自己和别人各种心理活动及思想观点、个性品质的认知;二是关于人与人之间的各种双边关系的认知，如对权威、友谊、冲突、合作等关系的认知;三是关于社团内部及社团之间各种社会关系的认知。儿童的社会性认知发展具有如下的趋势:第一，从表面到内部，即从对外部特征的注意到更深刻的品质特征的注意;第二，从简单到复杂，从问题的某个方面到多方面、多维度地看待问题;第三，从呆板到灵活的思维:第四，从对个人即时事件的关心到关心他人的长远利益;第五，从具体思维到抽象思维;第六，从弥散性的、间断性的想法到系统的、有组织的综合性的思想。	儿童社会性认知的发展是指儿童从出生开始，逐渐学会理解和参与社会互动的过程。这个过程可以分为几个阶段： 1. 婴儿期（0-1岁）：在这个阶段，婴儿开始学习区分亲人和陌生人，能够通过声音、面部表情和身体语言来识别和回应。他们开始理解简单的社会互动，如模仿成人行为和寻求关注。 2. 幼儿期（1-3岁）：在这个阶段，儿童开始发展基本的社会认知，如理解“我”和“你”的区别，开始表现出对他人的同情和模仿成人行为的能力。他们也开始学习简单的规则，如分享和轮流。 3. 学龄前期（3-5岁）：在这个阶段，儿童的社会认知能力显著提高，他们开始理解更复杂的社会规则，如合作和竞争。他们也开始表现出对他人情绪的理解和同情。 4. 学龄期（6岁及以上）：在这个阶段，儿童的社会认知能力进一步发展，他们能够理解更复杂的社会关系，如朋友和敌人之间的区别。他们开始发展自己的社会角色，如成为一个好朋友或团队成员。 总的来说，…	儿童社会性认知的发展趋势可以分为不同的阶段。在早期阶段，儿童主要关注自己的需求和欲望，难以理解他人的感受和想法。随着年龄的增长，他们开始逐渐学会推断他人的内心状态，理解他人的情感和意图，以及逐渐发展出共情能力。在学龄期，儿童开始建立起更加复杂的社会认知，包括理解他人的角色和社会规范，以及学会解决冲突和合作等社会技能。到了青少年期，他们开始更加深入地思考社会关系和道德问题，建立起自己的价值观和道德观念。 举例来说，一项研究发现，3-6岁的儿童在进行一项任务时，如果看到其他人需要帮助，他们会更愿意提供帮助，显示出了早期的共情能力。而在青少年期，他们可能会更加关注社会正义和公平，开始对社会问题和道德问题有更深入的思考。 总的来说，儿童社会性认知的发展趋势是从自我中心到他人中心，从简单到复杂，从个体到社会。通过社会交往和经验的积累，他们逐渐建立起更加丰富和成熟的社会认知能力。 回答结束
93	动机的本能理论詹姆斯提出人的行为依赖于本能的指引，人除了具有动物一样的生物本能外，还具有社会本能。本能论最著名的鼓吹者是美国心理学家麦独孤，他系统地提出了动机的本能理论，认为人类所有行为都是以本能为基础的，不能是人类，切思想和行为的基木源泉和动力。木能具有能量、行为和目标指向三个成分;个人和民族的性格与意志也是由本能逐渐发展而形成的。弗洛伊德的精神分析理论也是建立在本能论的基础上的，认为人的心理活动的原动力是由人类生来具有的本能驱力决定的，这种本能驱力使人类产生一种紧张状态，驱使人采取行动并通过消除紧张感来获得满足。人类最基本的本能是生的本能与死亡本能，它们是人类行为的两种基本动力。此外，20世纪50年代欧洲一批习性学家再度爆发出对本能论的研究热情。他们主要探讨控制本能行为的重要因素，如感觉输入机制、特定刺激、学习的作用和中枢机制等，企图揭示动物行为的生理因素与环境因素的关杀	动机的本能论是由心理学家Sigmund Freud提出的一种理论，认为人类行为受到本能的驱动。根据这一理论，人类内在的本能是由性和死亡本能组成的。性本能（libido）是指寻求性满足的冲动，而死亡本能则是指对生命的消极态度和对死亡的恐惧。 Freud认为，性本能在个体的发展过程中起着至关重要的作用，尤其是在儿童和青少年时期。性本能的发展会导致个体形成各种心理结构，如欲望、焦虑和防御机制。死亡本能则与个体对生命的消极态度和对死亡的恐惧有关，这种恐惧可能导致个体形成各种防御机制来避免面对死亡的现实。 在动机的本能论中，个体的行为被视为是本能冲动的满足过程。例如，一个人的工作动机可能是为了满足他们的性本能，通过在工作中获得成就感和认可来满足他们的自尊和自我价值感。同样，一个人的社交行为可能是为了满足他们的社交本能，通过与他人互动来满足他们的需要感和归属感。 总的来说，动机的本能论认为人类行为是…	动机的本能论是由美国心理学家亚伯拉罕·马斯洛提出的，他认为人类的行为受到内在的本能驱动，主要包括生理需要（比如食物、水和睡眠）和心理需要（比如安全感、社交需要和自尊需求）两大类。根据本能论，人们的行为是为了满足这些需要而产生的，当某种需要得不到满足时，就会产生动机驱使人们采取行动来满足这种需要。例如，当人们感到饥饿时，就会产生食物的需求，从而产生吃饭的动机。 回答结束
94	感觉相互作用是指在一定条件下，各种不同的感觉都可能发生相互作用从而使感受性发生变化的现象。由于人接受环境的信息常常是多通道同时进行，因此不同感觉的相互作用时常发生。例如，微光刺激可提高听觉的感受性，而强光刺激则会降低听觉的感受性。感觉相互作用的一般规律是弱刺激能提高另一种感觉的感受性，强刺激则会使另一种感觉的感受性降低。味觉和嗅觉的相互作用是尤其明显的。在生活中，品尝美味佳看需要嗅觉、味觉器官的共同作用，我们才能真正得到一种享受。比如闭上眼睛，捏住子，我们将分不清里吃的是苹果，还是土豆感冒的人常常味觉不敏感，当你伤风感冒。鼻子不通气时，由于缺少嗅觉的相互作用，单单依靠舌头来品尝时，再好吃的东西也会形同嚼蜡，大为逊色。因而重感冒的人会食而无味。	感觉相互作用（也称为感觉交互作用或感觉补偿）是指当一个感觉通道受到损害时，其他感觉通道会变得更加敏感，以补偿损失的感觉。这种现象在重感冒患者中尤为常见，因为感冒会影响身体的多个系统，包括神经系统和消化系统。 在重感冒患者中，食欲往往会减退，这可能是因为身体在应对病毒感染时，会分配更多的资源来支持免疫系统，而减少对消化系统的支持。同时，感冒可能会导致鼻窦炎、咽喉痛等症状，这些症状会分散患者的注意力，使得他们对食物的味道不那么敏感。 此外，感冒时的鼻塞和流鼻涕也会影响味觉。味觉是通过鼻腔和口腔的黏膜感受器来传递的，而鼻腔的感受器对于甜、酸、咸、苦和辣五种基本味道的检测尤为重要。当鼻腔受阻时，味觉的传递会受到影响，导致食物的味道变得不那么鲜明。 总之，重感冒患者感到食而无味的现象可能是由于身体资源的重新分配、消化系统的影响以及味觉传递受阻等因素的综合作用。	回答: 重感冒患者往往会感到食而无味可能是因为他们的嗅觉和味觉受到影响。感冒病毒会导致鼻塞和鼻腔黏膜肿胀，这会影响嗅觉的正常功能。因为味觉和嗅觉是相互作用的，所以当嗅觉受到影响时，味觉也会受到影响，导致食物的味道变得较为模糊或无味。此外，重感冒患者可能还会有食欲不振的症状，这也会影响他们对食物的感知和享受。 举例来说，有研究表明，如果一个人的嗅觉被故意阻断，他们对食物的味道会变得更加淡然，甚至有些食物会变得难以下咽。因此，重感冒患者感到食而无味可能是因为他们的嗅觉和味觉受到了影响，使得他们无法像平时那样享受食物的味道。 回答结束
